# Supplementary material for: Transcriptome Analysis of Rice Reveals the lncRNA–mRNA Regulatory Network in Response to Rice Black-Streaked Dwarf Virus Infection
Source: MDPI journal article supplement (doi:10.3390/v12090951), 2020-08-27
Supplement: s1 [file s1]

**Table S1.** PCR primer sequences used for qRT-PCR analysis.

| Primer-name                                   | Foreword primer               | Reverse primer            |
|-----------------------------------------------|-------------------------------|---------------------------|
|                                               | CAATCCGTTTGTAGAGCCATAATTGCATT | GAGGTTGCCTGAGTCACAGTTAAG  |
| <i>UBC</i> (LOC_Os02g42314)                   | G                             | TG                        |
| LOC_Os01g06730                                | CAATTCCTCCTTGCTGATCG          | CCTCCAATGTGCAACTTTCGT     |
| LOC_Os10g25090                                | AAGTTTGGCTGCTTCATGCC          | TGATCGATATCACTGCAACTAGC   |
| LOC_Os01g28500                                | TGTTTCACTGCTCCGATGCC          | TCCAGCTCATCGGACCCAC       |
| LOC_Os01g56330                                | AAGTTTTGGCTACCTTGACCC         | GGACCTCAAATAGCACAAACACC   |
| LOC_Os05g39720                                | GGCCGTCAATTTGATCAGCAT         | AAGTCACAAACCTTACCGGAG     |
| LOC_Os12g02450                                | TCAATCTGAATTGAGCAGGAGC        | TGCACCGTCTTTGTAGCCTT      |
| LOC_Os01g23970                                | CAATTTGATCTGTGGCAACGAC        | CGCTTTCACCTACGATTTCCC     |
| LOC_Os08g42700                                | AGAATTGCTCCCTCCACACT          | TGTTGTCTTTGCCACTGGAAGT    |
| LOC_Os02g03960                                | AAGCAACTAAGCACTGCACC          | TACCATGAGTCCATGAGACAGC    |
| TCONS_00005781                                | AGCCTTGCTAGTTAGATTGCAT        | TGCGGTCATACCTGTTTCGT      |
| TCONS_00056787                                | GAGTTTGCCACTTGCTTTTCGT        | AATGACTCGGCAACAACCTGA     |
| TCONS_00089479                                | ACACAAAAGCACAGAGTAGTGA        | TCCCAGTCCCTGCTTCAACGA     |
| TCONS_00008316                                | CTCATAGAGCCACCCTACAGT         | ATGTAATTTGCGCCCATCCAC     |
| TCONS_00040997                                | CGCAAGACATGATTACGACACGA       | ACAATTGCCCTAGATAGCTCCT    |
| TCONS_00049628                                | GCCAGATAATACGCCTCGCA          | ACGAGTGGCTCAATGTGCTT      |
| TCONS_00065705_silen<br>cing effect detection | ACCCAGAAGAAAGTAAGCCT          | TTCACTGGATTCATGCACGAG     |
| TCONS_00089479_silen<br>cing effect detection | TCCATGTACTCGAACGTGCCTA        | TGTCCAACATCCTGCTCGACT     |
| TCONS_00059822_silen<br>cing effect detection | GTACACGCCGAAACCTCGTC          | TGAAAGCTTCCCCGTCCCAA      |
| LOC_Os06g44010                                | CTTGGCTATATATCCTCCTCGTC       | AAGTCTGCTCAATCCACGAATCC   |
| LOC_Os01g06730                                | CAATTCCTCCTTGCTGATCG          | CCTCCAATGTGCAACTTTCGT     |
| LOC_Os03g18030                                | TCGCTGGCCTTCTTCTACAACC        | TGTGCTCGCGGTACTCGTCGAAG   |
| LOC_Os03g10640                                | CTATTTGGACTAAAGGGAGAAAATTCCG  | TGTCTAGAATGCCTTCAAATACATT |
|                                               | AT                            | TATCCTC                   |
| LOC_Os04g51660                                | TCATTGACCGCACGATCATCC         | AATCGAACGCATGTTTGGCT      |
| LOC_Os01g28500                                | TGTTTCACTGCTCCGATGCC          | TCCAGCTCATCGGACCCAC       |
| LOC_Os03g03034                                | TACCGGAACTACACCTACGACGA       | GTTGTTCTGAAGAGCTCCAAGCA   |
| LOC_Os02g47470                                | TGTGGCATTGCTGTCCATCTTCGG      | GTTGTACCCCTTCTCCAGCGTCAG  |

**Table S2.** PCR primer sequences used for vector construction.

| Primer-name                       | Primer-sequence                                   |
|-----------------------------------|---------------------------------------------------|
| 1300(BamHI)TCONS89479(exon)-F     | AGCTCGGTACCCGGGGATCCGAGCTAGCTACCCTCTACTCA         |
| TCONS89479(exon)+Intron-R         | AAAAATCAGACTTACAACGTAGAGCTTCTGACGGGGAAGA          |
| Intron+TCONS89479(exon)-F         | TTGGACCCAGCAGATAGAGCAGAGCTTCTGACGGGGAAGA          |
| TCONS89479(exon)(BamHI)1300-R     | AGGTCGACTCTAGAGGATCCGAGCTAGCTACCCTCTACTCA         |
| 1300(BamHI)TCONS65705(promoter)-F | AGCTCGGTACCCGGGGATCCGGTTCTCAAAGATACAAGTCAT<br>G   |
| TCONS65705(promoter)+Intron-R     | AAAAATCAGACTTACAACGTCCAAAATTTTATTAATTCCGTGT<br>AT |
| Intron+TCONS65705(promoter)-F     | TTGGACCCAGCAGATAGAGCCCAAATTTTATTAATTCCGTGT<br>AT  |
| TCONS65705(promoter)(BamHI)1300-R | AGGTCGACTCTAGAGGATCCGGTTCTCAAAGATACAAGTCAT<br>G   |
| 1300(BamHI)GUS600-F               | AGCTCGGTACCCGGGGATCCGTGGTGATGTGGAGTATTGCCA        |
| GUS600(BamHI)1300-R               | AGGTCGACTCTAGAGGATCCGTGGTGATGTGGAGTATTGCCA        |
| 1300(BamHI)59822(promoter)-F      | AGCTCGGTACCCGGGGATCCGACTAGTCGGTCCTGGTTAGG         |
| 59822(promoter)+Intron-R          | AAAAATCAGACTTACAACGTGTGGCATTATTTCCAAAATGG         |
| Intron+59822(promoter)-F          | TTGGACCCAGCAGATAGAGCGTGGCATTATTTCCAAAATG<br>G     |
| 59822(promoter)(BamHI)1300-R      | AGGTCGACTCTAGAGGATCCGACTAGTCGGTCCTGGTTAGG         |

**Table S4.** KEGG pathway enrichment for DEmRNAs.

| Pathway                                                  | DEGs with<br>pathway<br>annotation (871) | All genes with<br>pathway annotation<br>(21127) | <i>p</i> -value | Pathway<br>ID |
|----------------------------------------------------------|------------------------------------------|-------------------------------------------------|-----------------|---------------|
| Biosynthesis of secondary metabolites                    | 208 (23.88%)                             | 3435 (16.26%)                                   | 2.03E-09        | ko01110       |
| Metabolic pathways                                       | 274 (31.46%)                             | 4974 (23.54%)                                   | 3.11E-08        | ko01100       |
| Phenylalanine, tyrosine and tryptophan<br>biosynthesis   | 14 (1.61%)                               | 67 (0.32%)                                      | 4.72E-07        | ko00400       |
| Amino sugar and nucleotide sugar metabolism              | 27 (3.1%)                                | 228 (1.08%)                                     | 8.78E-07        | ko00520       |
| ABC transporters                                         | 21 (2.41%)                               | 164 (0.78%)                                     | 4.12E-06        | ko02010       |
| Stilbenoid, diarylheptanoid and gingerol<br>biosynthesis | 31 (3.56%)                               | 329 (1.56%)                                     | 1.75E-05        | ko00945       |
| Flavonoid biosynthesis                                   | 28 (3.21%)                               | 283 (1.34%)                                     | 1.82E-05        | ko00941       |
| Plant-pathogen interaction                               | 115 (13.2%)                              | 1931 (9.14%)                                    | 3.44E-05        | ko04626       |
| Plant hormone signal transduction                        | 73 (8.38%)                               | 1120 (5.3%)                                     | 7.20E-05        | ko04075       |
| Limonene and pinene degradation                          | 22 (2.53%)                               | 224 (1.06%)                                     | 1.55E-04        | ko00903       |
| Diterpenoid biosynthesis                                 | 20 (2.3%)                                | 195 (0.92%)                                     | 1.70E-04        | ko00904       |
| Glutathione metabolism                                   | 16 (1.84%)                               | 139 (0.66%)                                     | 2.01E-04        | ko00480       |
| Starch and sucrose metabolism                            | 32 (3.67%)                               | 394 (1.86%)                                     | 2.20E-04        | ko00500       |
| Isoflavonoid biosynthesis                                | 15 (1.72%)                               | 135 (0.64%)                                     | 4.60E-04        | ko00943       |
| Galactose metabolism                                     | 11 (1.26%)                               | 106 (0.5%)                                      | 4.32E-03        | ko00052       |
| Pyruvate metabolism                                      | 11 (1.26%)                               | 108 (0.51%)                                     | 4.98E-03        | ko00620       |
| Phenylpropanoid biosynthesis                             | 31 (3.56%)                               | 475 (2.25%)                                     | 8.23E-03        | ko00940       |
| Ascorbate and aldarate metabolism                        | 10 (1.15%)                               | 102 (0.48%)                                     | 9.40E-03        | ko00053       |
| Carbon fixation in photosynthetic organisms              | 9 (1.03%)                                | 91 (0.43%)                                      | 1.27E-02        | ko00710       |
| Steroid biosynthesis                                     | 9 (1.03%)                                | 92 (0.44%)                                      | 1.36E-02        | ko00100       |

**Table S7.** KEGG pathway enrichment for mRNAs which are co-located with DElncRNAs.

| Pathway                                        | DEGs with pathway<br>annotation (109) | All genes with<br>pathway annotation<br>(21127) | <i>p</i> -value | Pathway<br>ID |
|------------------------------------------------|---------------------------------------|-------------------------------------------------|-----------------|---------------|
| Indole alkaloid biosynthesis                   | 2 (1.83%)                             | 41 (0.19%)                                      | 1.90E-02        | ko00901       |
| Lysine degradation                             | 2 (1.83%)                             | 47 (0.22%)                                      | 2.45E-02        | ko00310       |
| Valine, leucine and isoleucine degradation     | 2 (1.83%)                             | 56 (0.27%)                                      | 3.39E-02        | ko00280       |
| Ubiquitin mediated proteolysis                 | 5 (4.59%)                             | 354 (1.68%)                                     | 3.66E-02        | ko04120       |
| Plant-pathogen interaction                     | 16 (14.68%)                           | 1931 (9.14%)                                    | 3.91E-02        | ko04626       |
| Pyrimidine metabolism                          | 6 (5.5%)                              | 495 (2.34%)                                     | 4.32E-02        | ko00240       |
| Non-homologous end-joining                     | 1 (0.92%)                             | 9 (0.04%)                                       | 4.55E-02        | ko03450       |
| Synthesis and degradation of ketone bodies     | 1 (0.92%)                             | 9 (0.04%)                                       | 4.55E-02        | ko00072       |
| Cutin, suberine and wax biosynthesis           | 3 (2.75%)                             | 163 (0.77%)                                     | 5.23E-02        | ko00073       |
| Porphyrin and chlorophyll metabolism           | 2 (1.83%)                             | 76 (0.36%)                                      | 5.87E-02        | ko00860       |
| Nucleotide excision repair                     | 3 (2.75%)                             | 171 (0.81%)                                     | 5.87E-02        | ko03420       |
| Alanine, aspartate and glutamate<br>metabolism | 2 (1.83%)                             | 83 (0.39%)                                      | 6.85E-02        | ko00250       |
| Thiamine metabolism                            | 1 (0.92%)                             | 16 (0.08%)                                      | 7.94E-02        | ko00730       |
| Photosynthesis - antenna proteins              | 1 (0.92%)                             | 16 (0.08%)                                      | 7.94E-02        | ko00196       |
| Mismatch repair                                | 2 (1.83%)                             | 92 (0.44%)                                      | 8.19E-02        | ko03430       |
| Steroid biosynthesis                           | 2 (1.83%)                             | 92 (0.44%)                                      | 8.19E-02        | ko00100       |
| RNA polymerase                                 | 4 (3.67%)                             | 359 (1.7%)                                      | 1.15E-01        | ko03020       |
| Vitamin B6 metabolism                          | 1 (0.92%)                             | 25 (0.12%)                                      | 1.21E-01        | ko00750       |
| DNA replication                                | 2 (1.83%)                             | 126 (0.6%)                                      | 1.38E-01        | ko03030       |
| Selenocompound metabolism                      | 1 (0.92%)                             | 29 (0.14%)                                      | 1.39E-01        | ko00450       |

**Table S9.** KEGG pathway enrichment for mRNAs which are co-expressed with DElncRNAs.

| Pathway                                            | DEGs with<br>pathway<br>annotation (2045) | All genes with<br>pathway<br>annotation (21127) | <i>p</i> -value | Pathway<br>ID |
|----------------------------------------------------|-------------------------------------------|-------------------------------------------------|-----------------|---------------|
| Biosynthesis of secondary metabolites              | 410 (20.05%)                              | 3435 (16.26%)                                   | 1.07E-06        | ko01110       |
| Tryptophan metabolism                              | 25 (1.22%)                                | 122 (0.58%)                                     | 2.36E-04        | ko00380       |
| Other glycan degradation                           | 29 (1.42%)                                | 155 (0.73%)                                     | 4.02E-04        | ko00511       |
| Homologous recombination                           | 250 (12.22%)                              | 2155 (10.2%)                                    | 1.04E-03        | ko03440       |
| Carotenoid biosynthesis                            | 33 (1.61%)                                | 211 (1%)                                        | 3.96E-03        | ko00906       |
| Plant hormone signal transduction                  | 134 (6.55%)                               | 1120 (5.3%)                                     | 5.54E-03        | ko04075       |
| Plant-pathogen interaction                         | 219 (10.71%)                              | 1931 (9.14%)                                    | 6.12E-03        | ko04626       |
| Metabolic pathways                                 | 527 (25.77%)                              | 4974 (23.54%)                                   | 7.12E-03        | ko01100       |
| RNA degradation                                    | 183 (8.95%)                               | 1595 (7.55%)                                    | 7.58E-03        | ko03018       |
| alpha-Linolenic acid metabolism                    | 21 (1.03%)                                | 132 (0.62%)                                     | 1.57E-02        | ko00592       |
| Glucosinolate biosynthesis                         | 11 (0.54%)                                | 56 (0.27%)                                      | 1.71E-02        | ko00966       |
| Glycosphingolipid biosynthesis - ganglio<br>series | 6 (0.29%)                                 | 23 (0.11%)                                      | 1.95E-02        | ko00604       |
| Amino sugar and nucleotide sugar<br>metabolism     | 32 (1.56%)                                | 228 (1.08%)                                     | 2.08E-02        | ko00520       |
| Flavonoid biosynthesis                             | 38 (1.86%)                                | 283 (1.34%)                                     | 2.42E-02        | ko00941       |
| Zeatin biosynthesis                                | 127 (6.21%)                               | 1108 (5.24%)                                    | 2.42E-02        | ko00908       |
| Phenylpropanoid biosynthesis                       | 59 (2.89%)                                | 475 (2.25%)                                     | 2.78E-02        | ko00940       |
| Ribosome biogenesis in eukaryotes                  | 176 (8.61%)                               | 1593 (7.54%)                                    | 3.19E-02        | ko03008       |
| Phenylalanine metabolism                           | 30 (1.47%)                                | 222 (1.05%)                                     | 3.84E-02        | ko00360       |
| Glycosaminoglycan degradation                      | 7 (0.34%)                                 | 35 (0.17%)                                      | 4.75E-02        | ko00531       |
| Galactose metabolism                               | 16 (0.78%)                                | 106 (0.5%)                                      | 4.87E-02        | ko00052       |
