# Supplementary material for: Transcriptome Analysis of Rice Reveals the lncRNA–mRNA Regulatory Network in Response to Rice Black-Streaked Dwarf Virus Infection
Source: MDPI journal article supplement (doi:10.3390/v12090951), 2020-08-27
Supplement: s1 [file s1]

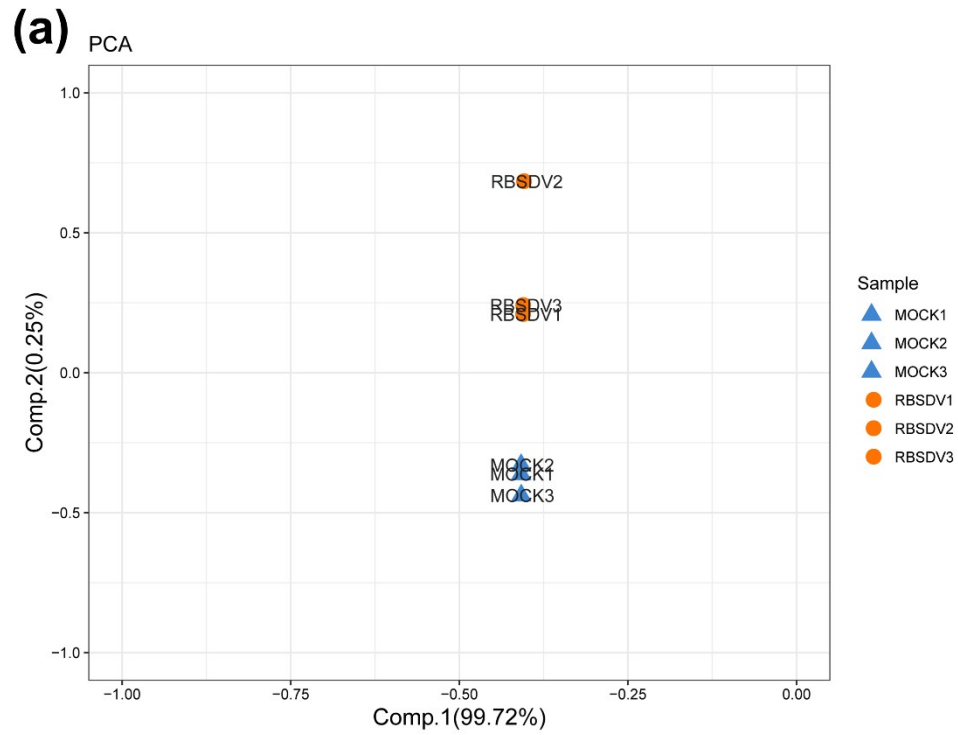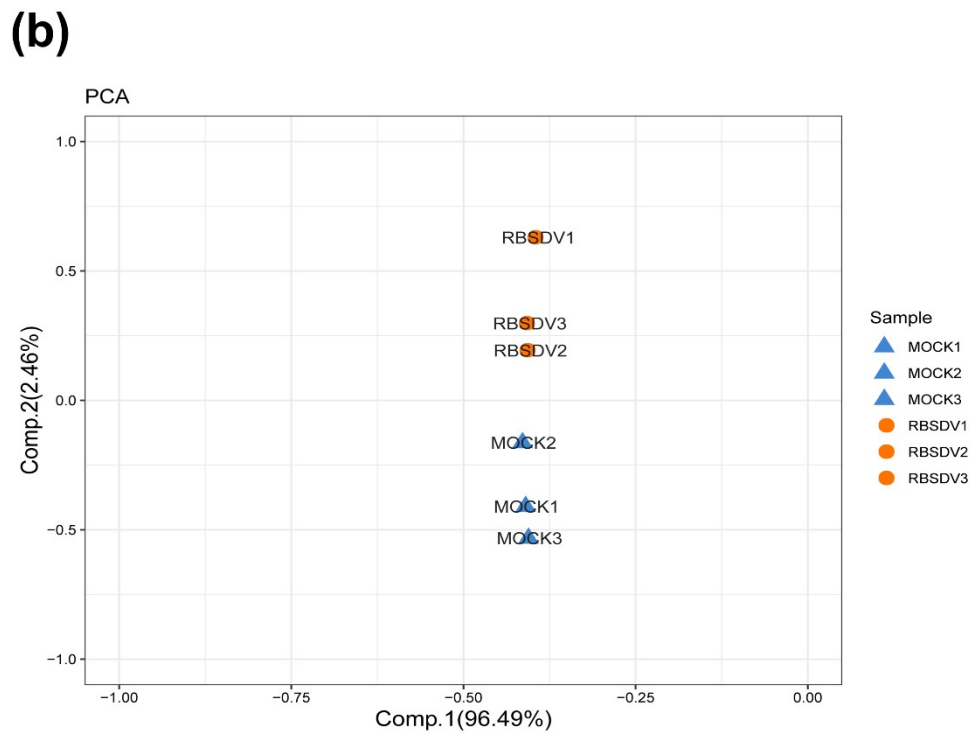

**Figure S1.** The principal component analysis (PCA) of mRNAs (a) and lncRNAs (b). The yellow circles represent RBSDV-infected rice plants. The blue triangles represent the MOCK rice plants.

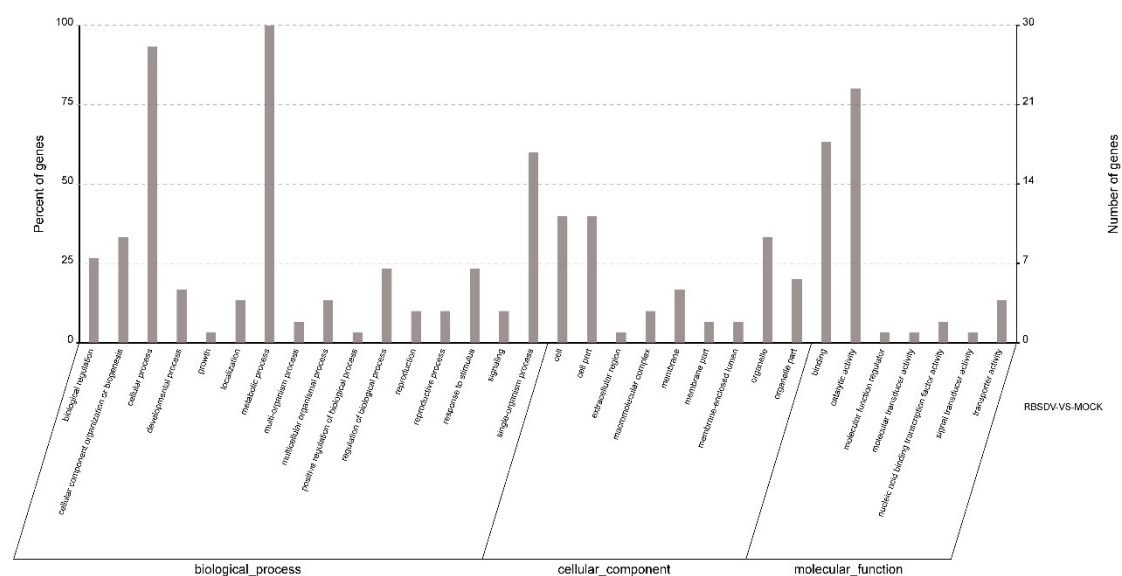

**Figure S2.** GO enrichment analysis of mRNAs co-located with DElncRNAs identified between the RBSDV-infected and the mock rice plants.

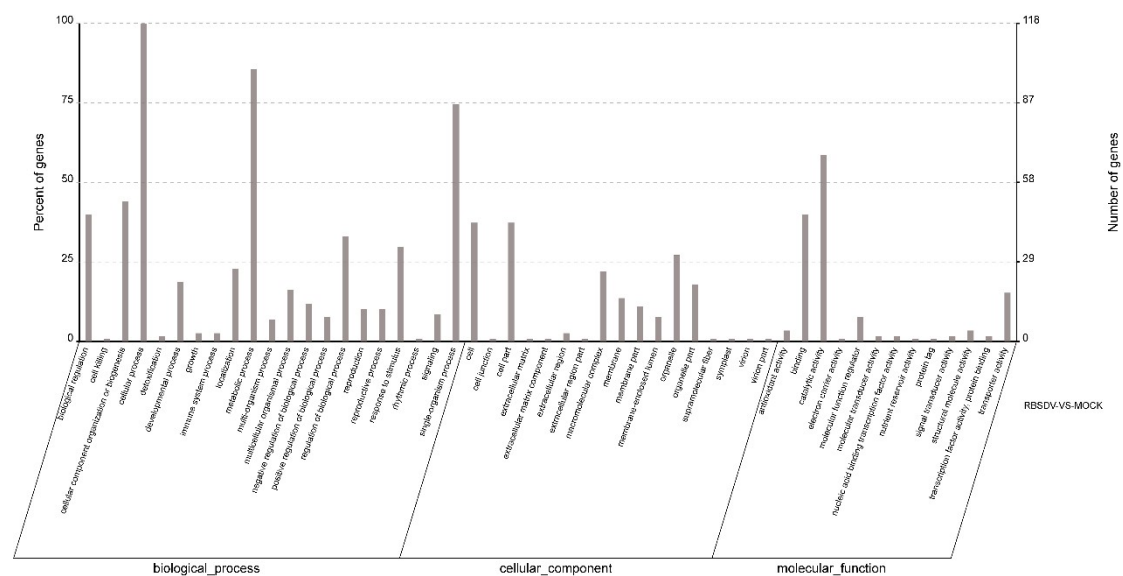

**Figure S3.** GO enrichment analysis of mRNAs co-expressed with DElncRNAs identified between the RBSDV-infected and the mock rice plants.

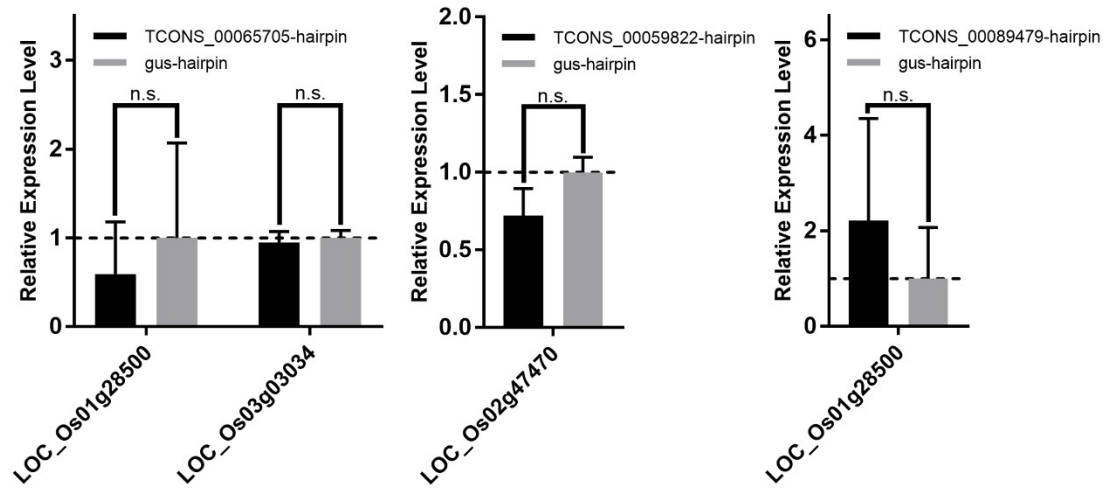

**Figure S4.** The qRT-PCR data of the mRNAs with no significant changes after silencing lncRNAs. The total RNA of rice callus in Fig. 8 was used for qRT-PCR analyses. *OsUBC* served as an internal reference in relative quantification. The values represent means of the mRNA expression levels  $\pm$  standard deviations (SD) relative to the gus-hairpin-expressed callus tissues ( $n = 3$  biological replicates). The significant differences between lncRNA-silenced and gus-hairpin-expressed callus tissues were determined by Student's *t*-test.(two-sided, n.s. = not significant)
