# Supplementary material for: Transcriptome Analysis of Rice Reveals the lncRNA–mRNA Regulatory Network in Response to Rice Black-Streaked Dwarf Virus Infection
Source: Viruses. 2020 Aug 27;12(9):951. doi: 10.3390/v12090951 (PMC7552052; doi:10.3390/v12090951)
Supplement: Supplementary file 1 [file viruses-12-00951-s001.zip]

Archive with 8 entries (8 files):
- Supplementary Data-Figures.pdf
- Supplementary Data-Tables 1,2,4,7,9.pdf
- Table S10. Detail information of the DElncRNA-DEmRNA co-expressed pairs.xlsx
- Table S11. Detail information of the DElncRNA-DEmRNA co-expressed pairs involved in the plant-pathogen interaction pathway.xlsx
- Table S3.Detail information of the DEmRNAs.xlsx
- Table S5. DEmRNAs involved in the plant-pathogen interaction pathway.xlsx
- Table S6. The 304 mRNAs co-located with DElncRNAs..xlsx
- Table S8. The 17335 mRNAs co-expressed with DElncRNAs.xlsx
