# Supplementary material for: Transcriptome Analysis of Rice Reveals the lncRNA–mRNA Regulatory Network in Response to Rice Black-Streaked Dwarf Virus Infection
Source: Viruses. 2020 Aug 27;12(9):951. doi: 10.3390/v12090951 (PMC7552052; doi:10.3390/v12090951)
Supplement: Supplementary file 1 [file viruses-12-00951-s001.zip › Table S3.Detail information of the DEmRNAs.xlsx]

## Sheet: Sheet1
GeneID	length	JNICK1_readsCount(CK)	JNICK2_readsCount(CK)	JNICK3_readsCount(CK)	JNIRB1_readsCount(RBSDV)	JNIRB2_readsCount(RBSDV)	JNIRB3_readsCount(RBSDV)	logCPM	log2Ratio(RBSDV/CK)	Up-Down-Regulation(RBSDV/CK)	P-value	FDR	Pathway	GO Component	GO Function	GO Process	Blast nr
LOC_Os01g72370	747	3	1	0	1624	3	170	4.98134	8.87085	up	3.22e-08	3e-06	-	GO:0090575//RNA polymerase II transcription factor complex	GO:0000977//RNA polymerase II regulatory region sequence-specific DNA binding;GO:0046983//protein dimerization activity;GO:0003700//transcription factor activity, sequence-specific DNA binding	GO:0006357//regulation of transcription from RNA polymerase II promoter;GO:0010106//cellular response to iron ion starvation;GO:0055072//iron ion homeostasis	gi|15528806|dbj|BAB64701.1|;gi|113534955|dbj|BAF07338.1|/1.20151e-163;1.05856e-162/bHLH transcription factor-like [Oryza sativa Japonica Group] ;Os01g0952800 [Oryza sativa Japonica Group]
LOC_Os01g03360	765	0	0	0	1	31	131	1.55803	8.86533	up	9.34e-08	7.4e-06	-	GO:0005576//extracellular region;GO:0016023//cytoplasmic, membrane-bounded vesicle	GO:0004867//serine-type endopeptidase inhibitor activity	GO:0010951//negative regulation of endopeptidase activity	gi|152032528|sp|Q0JR25.2|IBBR_ORYSJ/3.39293e-175/RecName: Full=Bowman-Birk type bran trypsin inhibitor; AltName: Full=OSE727A; AltName: Full=Protein RBBI3-3; AltName: Full=RBTI; Flags: Precursor
LOC_Os01g37000	1221	5	1	1	28.54	40.75	1525.86	4.81092	7.95758	up	8.93e-09	9.57e-07	-	GO:0016023//cytoplasmic, membrane-bounded vesicle	-	-	gi|113532834|dbj|BAF05217.1|/0/Os01g0550800 [Oryza sativa Japonica Group]
LOC_Os03g26760	5469	0	0	0	32.97	9.97	35.99	0.599658	7.82704	up	1.43e-09	2.05e-07	ko03440//Homologous recombination;ko00240//Pyrimidine metabolism;ko01100//Metabolic pathways;ko03460//Fanconi anemia pathway;ko02020//Two-component system;ko02010//ABC transporters;ko00670//One carbon pool by folate	-	GO:0003676//nucleic acid binding;GO:0008270//zinc ion binding	GO:0015074//DNA integration	gi|108708504|gb|ABF96299.1|/0/retrotransposon protein, putative, Ty3-gypsy subclass, expressed [Oryza sativa Japonica Group]
LOC_Os10g40720	807	1	0	0	17	174	79	2.21603	7.71639	up	1.85e-14	7.1e-12	-	GO:0005576//extracellular region;GO:0016020//membrane;GO:0016023//cytoplasmic, membrane-bounded vesicle;GO:0005618//cell wall	-	GO:0071555//cell wall organization;GO:0019953//sexual reproduction	gi|115502197|sp|Q336T5.2|EXPB3_ORYSJ/2.13319e-176/RecName: Full=Expansin-B3; AltName: Full=Beta-expansin-3; AltName: Full=OsEXPB3; AltName: Full=OsaEXPb1.10; Flags: Precursor
LOC_Os09g36700	780	1	0	0	57	23	159	2.10024	7.60822	up	2.27e-14	8.53e-12	-	GO:0016023//cytoplasmic, membrane-bounded vesicle	GO:0003723//RNA binding;GO:0033897//ribonuclease T2 activity	GO:0090502//RNA phosphodiester bond hydrolysis, endonucleolytic	gi|937934256|dbj|BAT09171.1|/9.23512e-165/Os09g0538000 [Oryza sativa Japonica Group]
LOC_Os09g36680	759	10	26	3	3446	735	2252	6.80964	7.49183	up	8.57e-25	1.83e-21	-	GO:0016023//cytoplasmic, membrane-bounded vesicle	GO:0003723//RNA binding;GO:0033897//ribonuclease T2 activity	GO:0090502//RNA phosphodiester bond hydrolysis, endonucleolytic	gi|17105171|gb|AAL35582.1|AF439449_1/0/RNase S-like protein [Oryza sativa]
LOC_Os10g03340	3345	0	0	0	32.13	16.38	9.42	0.204263	7.36527	up	9.57e-08	7.55e-06	-	-	-	-	gi|18997234|gb|AAL83351.1|AC074282_18/0/Putative retrotransposable elements TNP2 [Oryza sativa Japonica Group]
LOC_Os11g18570	1455	1	6	1	127	517	542	4.33945	7.26586	up	2.63e-28	1.23e-24	ko01120//Microbial metabolism in diverse environments;ko01100//Metabolic pathways;ko00905//Brassinosteroid biosynthesis;ko01110//Biosynthesis of secondary metabolites;ko00020//Citrate cycle (TCA cycle)	GO:0016021//integral component of membrane;GO:0016023//cytoplasmic, membrane-bounded vesicle	GO:0016705//oxidoreductase activity, acting on paired donors, with incorporation or reduction of molecular oxygen;GO:0004497//monooxygenase activity;GO:0020037//heme binding;GO:0005506//iron ion binding	GO:0016132//brassinosteroid biosynthetic process;GO:0055114//oxidation-reduction process;GO:0010268//brassinosteroid homeostasis;GO:0007275//multicellular organism development;GO:0016125//sterol metabolic process	gi|77550029|gb|ABA92826.1|/0/Cytochrome P450 family protein, expressed [Oryza sativa Japonica Group]
LOC_Os11g18366	1845	0	1	0	12	60	113	1.72684	7.20141	up	3.32e-12	8.05e-10	ko01100//Metabolic pathways;ko00100//Steroid biosynthesis;ko01110//Biosynthesis of secondary metabolites	GO:0016020//membrane;GO:0016021//integral component of membrane	GO:0016866//intramolecular transferase activity	-	gi|108864254|gb|ABG22450.1|;gi|108864253|gb|ABG22449.1|;gi|108864255|gb|ABG22451.1|/0;0;0/Cycloartenol synthase, putative, expressed [Oryza sativa Japonica Group];Cycloartenol synthase, putative, expressed [Oryza sativa Japonica Group];Cycloartenol synthase, putative, expressed [Oryza sativa Japonica Group]
LOC_Os07g15460	1557	5	4	2	1351	1	97	4.67883	7.17755	up	1.37e-06	7.28e-05	-	GO:0016021//integral component of membrane	GO:0005381//iron ion transmembrane transporter activity	GO:0055072//iron ion homeostasis;GO:0034755//iron ion transmembrane transport	gi|122167523|sp|Q0D7E4.1|NRAM1_ORYSJ/0/RecName: Full=Metal transporter Nramp1; Short=OsNramp1
LOC_Os08g05360	5301	0	0	0	27.71	0	19.25	-0.0332847	7.09797	up	0.00012417	0.00321334	-	-	GO:0008270//zinc ion binding	-	gi|77551147|gb|ABA93944.1|/0/transposon protein, putative, Mutator sub-class [Oryza sativa Japonica Group]
LOC_Os07g01820	804	0	1	0	34	89	30	1.44738	6.9009	up	2.69e-15	1.26e-12	-	GO:0005634//nucleus	GO:0003700//transcription factor activity, sequence-specific DNA binding;GO:0003677//DNA binding;GO:0046983//protein dimerization activity;GO:0005515//protein binding	GO:0006355//regulation of transcription, DNA-templated;GO:0006351//transcription, DNA-templated	gi|573950211|ref|XP_006657400.1|;gi|45385962|gb|AAS59826.1|;gi|215704258|dbj|BAG93098.1|;gi|33146447|dbj|BAC79555.1|;gi|1002281937|ref|XP_015645261.1|;gi|218198968|gb|EEC81395.1|/1.57291e-76;4.30988e-136;3.9848e-47;4.64151e-137;3.63309e-123;1.92501e-160/PREDICTED: MADS-box transcription factor 15 [Oryza brachyantha];MADS-box protein RMADS215 [Oryza sativa];unnamed protein product [Oryza sativa Ja…
LOC_Os04g52440	1494	2	0	1	19	14	314	2.63511	6.8819	up	2.35e-08	2.32e-06	ko00260//Glycine, serine and threonine metabolism;ko00330//Arginine and proline metabolism;ko00680//Methane metabolism;ko00430//Taurine and hypotaurine metabolism;ko01120//Microbial metabolism in diverse environments;ko01100//Metabolic pathways;ko00640//Propanoate metabolism;ko00620//Pyruvate metabolism;ko01110//Biosynthesis of secondary metabolites;ko00250//Alanine, aspartate and glutamate metab…	GO:0005739//mitochondrion	GO:0030170//pyridoxal phosphate binding;GO:0042802//identical protein binding;GO:0008483//transaminase activity	-	gi|1002262742|ref|XP_015635716.1|/0/PREDICTED: probable gamma-aminobutyrate transaminase 2, mitochondrial isoform X1 [Oryza sativa Japonica Group]
LOC_Os12g31140	3333	0	0	0	26.68	0	9.29	-0.338268	6.71565	up	0.000437826	0.00885627	-	-	GO:0003677//DNA binding;GO:0008234//cysteine-type peptidase activity	GO:0006508//proteolysis	gi|32490233|emb|CAE05677.1|/0/OSJNBb0033P05.16 [Oryza sativa Japonica Group]
LOC_Os10g40700	828	0	0	0	3	15	19	-0.322434	6.7106	up	2.05e-05	0.000734454	-	GO:0005576//extracellular region;GO:0016020//membrane;GO:0016023//cytoplasmic, membrane-bounded vesicle;GO:0005618//cell wall	-	GO:0071555//cell wall organization;GO:0019953//sexual reproduction	gi|75232353|sp|Q7XCA7.1|EXPB6_ORYSJ/0/RecName: Full=Expansin-B6; AltName: Full=Beta-expansin-6; AltName: Full=OsEXPB6; AltName: Full=OsaEXPb1.8; Flags: Precursor
LOC_Os03g56930	711	3	0	1	243	28	130	2.83774	6.70859	up	7.08e-15	3.02e-12	-	-	-	-	-
LOC_Os06g35520	1092	2	1	1	242	43	104	2.79108	6.65116	up	1.1e-17	8.1e-15	ko00940//Phenylpropanoid biosynthesis;ko00360//Phenylalanine metabolism;ko01100//Metabolic pathways;ko01110//Biosynthesis of secondary metabolites	GO:0005576//extracellular region;GO:0016023//cytoplasmic, membrane-bounded vesicle	GO:0046872//metal ion binding;GO:0020037//heme binding;GO:0004601//peroxidase activity	GO:0098869//cellular oxidant detoxification;GO:0006979//response to oxidative stress;GO:0042744//hydrogen peroxide catabolic process;GO:0055114//oxidation-reduction process	gi|1002279095|ref|XP_015643864.1|/0/PREDICTED: peroxidase P7 [Oryza sativa Japonica Group]
LOC_Os01g28500	504	7	4	5	216	311	870	4.60552	6.58452	up	3.21e-28	1.23e-24	ko04626//Plant-pathogen interaction;ko04075//Plant hormone signal transduction	GO:0005576//extracellular region;GO:0016023//cytoplasmic, membrane-bounded vesicle	-	GO:0006952//defense response;GO:0009607//response to biotic stimulus	gi|113532622|dbj|BAF05005.1|/2.75482e-123/Os01g0382400 [Oryza sativa Japonica Group]
LOC_Os04g56430	777	20	4	8	22	72	2528	5.53526	6.55333	up	9.98e-07	5.58e-05	-	GO:0009506//plasmodesma;GO:0016023//cytoplasmic, membrane-bounded vesicle;GO:0005886//plasma membrane	GO:0004674//protein serine/threonine kinase activity	GO:0006952//defense response;GO:0006468//protein phosphorylation	gi|33465895|gb|AAQ19329.1|/6.44434e-164/receptor like-protein kinase DUF26 [Oryza sativa]
LOC_Os10g02880	1101	0	1	1	11	8	160	1.71313	6.41142	up	2.91e-07	2.01e-05	ko00940//Phenylpropanoid biosynthesis;ko01100//Metabolic pathways;ko00945//Stilbenoid, diarylheptanoid and gingerol biosynthesis;ko01110//Biosynthesis of secondary metabolites;ko00944//Flavone and flavonol biosynthesis;ko00402//Benzoxazinoid biosynthesis	-	GO:0046983//protein dimerization activity;GO:0008757//S-adenosylmethionine-dependent methyltransferase activity;GO:0008171//O-methyltransferase activity	GO:0032259//methylation;GO:0019438//aromatic compound biosynthetic process	gi|31429903|gb|AAP51892.1|/0/O-methyltransferase family protein, expressed [Oryza sativa Japonica Group]
LOC_Os04g51796	665	0	0	0	11	7	10	-0.614408	6.328	up	2.18e-05	0.000771406	-	GO:0016023//cytoplasmic, membrane-bounded vesicle;GO:0016020//membrane	-	-	gi|1002260418|ref|XP_015634536.1|;gi|937915982|dbj|BAS90901.1|/1.01599e-149;1.61187e-149/PREDICTED: uncharacterized protein LOC9271971 isoform X2 [Oryza sativa Japonica Group];Os04g0607150 [Oryza sativa Japonica Group]
LOC_Os03g19427	999	0	0	0	18	0	9	-0.643922	6.30475	up	0.000802387	0.0144699	-	-	GO:0030410//nicotianamine synthase activity	GO:0030418//nicotianamine biosynthetic process;GO:0006826//iron ion transport	gi|122170359|sp|Q0DSH9.1|NAS1_ORYSJ/0/RecName: Full=Nicotianamine synthase 1; AltName: Full=S-adenosyl-L-methionine:S-adenosyl-L-methionine:S-adenosyl-methionine 3-amino-3-carboxypropyltransferase 1; Short=OsNAS1
LOC_Os06g18670	1446	2	0	0	65	58	43	1.5838	6.27182	up	4.34e-20	4.9e-17	ko00943//Isoflavonoid biosynthesis;ko00940//Phenylpropanoid biosynthesis	GO:0043231//intracellular membrane-bounded organelle	GO:0080044//quercetin 7-O-glucosyltransferase activity;GO:0080043//quercetin 3-O-glucosyltransferase activity;GO:0000166//nucleotide binding	GO:0009813//flavonoid biosynthetic process;GO:0052696//flavonoid glucuronidation	gi|113595457|dbj|BAF19331.1|/0/Os06g0289900 [Oryza sativa Japonica Group]
LOC_Os12g43440	549	1	1	0	23	47	90	1.53968	6.22023	up	7.91e-14	2.76e-11	-	GO:0005576//extracellular region;GO:0016023//cytoplasmic, membrane-bounded vesicle	-	-	gi|113649842|dbj|BAF30354.1|/1.28538e-108/Os12g0630100 [Oryza sativa Japonica Group]
LOC_Os04g12040	5859	0	0	0	11.87	1.58	11.54	-0.723772	6.18556	up	0.000224126	0.0052095	ko03440//Homologous recombination;ko00240//Pyrimidine metabolism;ko01100//Metabolic pathways;ko03460//Fanconi anemia pathway;ko02020//Two-component system;ko02010//ABC transporters;ko00670//One carbon pool by folate	GO:0009536//plastid;GO:0005739//mitochondrion	GO:0004523//RNA-DNA hybrid ribonuclease activity;GO:0003676//nucleic acid binding	GO:0090502//RNA phosphodiester bond hydrolysis, endonucleolytic;GO:0015074//DNA integration	gi|38344225|emb|CAE03695.2|/0/OSJNBb0026E15.13 [Oryza sativa Japonica Group]
LOC_Os02g04200	4971	0	0	0	11.75	0	10.67	-0.828142	6.03888	up	0.00113876	0.018956	-	-	GO:0008270//zinc ion binding	-	gi|18855019|gb|AAL79711.1|AC091774_2/0/putative transposon protein [Oryza sativa Japonica Group]
LOC_Os11g26790	519	5	3	19	813	58	561	4.67102	5.92662	up	2.68e-12	6.77e-10	-	-	-	-	gi|122207812|sp|Q2R4Z4.1|DHR21_ORYSJ/2.42335e-24/RecName: Full=Water stress-inducible protein Rab21
LOC_Os04g21130	972	0	1	0	40	15	13	0.423215	5.77229	up	1.37e-07	1.06e-05	-	-	-	-	gi|39546269|emb|CAD39818.3|/0/OSJNBa0079F16.17 [Oryza sativa Japonica Group]
LOC_Os10g33810	831	2	0	0	59	18	35	1.07542	5.72856	up	4.46e-11	8.73e-09	-	-	GO:0003677//DNA binding	-	gi|10140742|gb|AAG13574.1|AC037425_5/1.00374e-155/myb factor [Oryza sativa Japonica Group]
LOC_Os03g54850	1569	0	0	1.44	52.76	19.02	12.48	0.696975	5.69954	up	1.33e-08	1.37e-06	-	-	-	-	gi|37718797|gb|AAR01668.1|/0/hypothetical protein [Oryza sativa Japonica Group]
LOC_Os12g43490	777	1	0	1	15	2	89	1.01386	5.67695	up	8.67e-06	0.000363151	-	GO:0016023//cytoplasmic, membrane-bounded vesicle	-	-	gi|1002310775|ref|XP_015618746.1|/4.55133e-170/PREDICTED: alpha-amylase/trypsin inhibitor [Oryza sativa Japonica Group]
LOC_Os11g32650	1197	3	1	2	91	143	55	2.34715	5.63759	up	4.93e-23	8.59e-20	ko00941//Flavonoid biosynthesis;ko01100//Metabolic pathways;ko04712//Circadian rhythm - plant;ko01110//Biosynthesis of secondary metabolites	-	GO:0016210//naringenin-chalcone synthase activity	GO:0009813//flavonoid biosynthetic process	gi|122207322|sp|Q2R3A1.1|CHS1_ORYSJ/0/RecName: Full=Chalcone synthase 1; Short=OsCHS1; AltName: Full=Naregenin-chalcone synthase
LOC_Os04g48930	1407	0	1	0	40	1	14	0.176052	5.48432	up	0.000134477	0.00341469	ko04626//Plant-pathogen interaction	GO:0016020//membrane	-	-	gi|116309691|emb|CAH66739.1|;gi|937915711|dbj|BAS90630.1|/0;0/H0404F02.15 [Oryza sativa Indica Group];Os04g0578600, partial [Oryza sativa Japonica Group]
LOC_Os04g12970	1401	1	2	3	125	53.01	72	2.17667	5.45875	up	5.56e-20	5.61e-17	-	GO:0043231//intracellular membrane-bounded organelle	GO:0080043//quercetin 3-O-glucosyltransferase activity;GO:0080044//quercetin 7-O-glucosyltransferase activity	GO:0009813//flavonoid biosynthetic process;GO:0052696//flavonoid glucuronidation	gi|38345012|emb|CAE01609.2|/0/OSJNBa0052O21.15 [Oryza sativa Japonica Group]
LOC_Os06g13390	1059	0	5	3	7	21	281	2.49132	5.36555	up	5.72e-06	0.000251583	ko00592//alpha-Linolenic acid metabolism	-	GO:0016740//transferase activity	-	gi|937922084|dbj|BAS97001.1|/0/Os06g0242000, partial [Oryza sativa Japonica Group]
LOC_Os11g15624	390	1	3	0	129	0	30	1.57155	5.34214	up	6.69e-05	0.00193064	-	-	-	-	gi|1002293957|ref|XP_015651309.1|;gi|149390977|gb|ABR25506.1|/2.93317e-09;5.45323e-55/PREDICTED: uncharacterized protein LOC107282084 isoform X2 [Oryza sativa Japonica Group];unknown, partial [Oryza sativa Indica Group]
LOC_Os11g26760	495	1	0	0	23	4	22	0.0355952	5.33027	up	1.73e-05	0.000638684	-	-	-	GO:0050896//response to stimulus	gi|152013504|sp|A2ZDX6.1|DH16C_ORYSI/9.97866e-30/RecName: Full=Dehydrin Rab16C
LOC_Os12g27830	1050	2	0	0	48	9	26	0.693433	5.30559	up	1.48e-07	1.13e-05	-	GO:0016021//integral component of membrane;GO:0016023//cytoplasmic, membrane-bounded vesicle	-	-	gi|108862659|gb|ABA98146.2|/0/oxidoreductase, short chain dehydrogenase/reductase family protein, expressed [Oryza sativa Japonica Group]
LOC_Os01g28960	936	0	0	1	23	5	20	0.0103399	5.30049	up	1.34e-05	0.000517702	-	-	-	-	gi|77551641|gb|ABA94438.1|/2.91416e-161/retrotransposon protein, putative, Ty3-gypsy subclass [Oryza sativa Japonica Group]
LOC_Os07g04930	510	2	0	1	98	2	12	1.09603	5.25523	up	3.12e-05	0.00103574	-	GO:0016023//cytoplasmic, membrane-bounded vesicle	-	GO:0007275//multicellular organism development	gi|24059937|dbj|BAC21400.1|/4.35528e-11/proline-rich protein-like [Oryza sativa Japonica Group]
LOC_Os03g28160	581	0	0	1	18	13	16	-0.0218749	5.24912	up	1.15e-06	6.32e-05	-	-	-	-	gi|14165340|gb|AAK55472.1|AC084295_5;gi|108708657|gb|ABF96452.1|/2.82366e-119;5.06239e-106/putative salt-induced protein [Oryza sativa Japonica Group];Jacalin-like lectin domain containing protein, expressed [Oryza sativa Japonica Group]
LOC_Os01g71670	1005	6	6	5	165	204	216	3.36859	5.22297	up	8.68e-42	1.66e-37	-	GO:0046658//anchored component of plasma membrane;GO:0016023//cytoplasmic, membrane-bounded vesicle	GO:0004553//hydrolase activity, hydrolyzing O-glycosyl compounds;GO:0030247//polysaccharide binding	GO:0005975//carbohydrate metabolic process	gi|113534903|dbj|BAF07286.1|/0/Os01g0944700 [Oryza sativa Japonica Group]
LOC_Os08g10310	3075	3	2	1	25	44	142	1.94712	5.21338	up	2.57e-11	5.35e-09	ko05142//Chagas disease (American trypanosomiasis);ko05133//Pertussis;ko05145//Toxoplasmosis;ko04626//Plant-pathogen interaction;ko04075//Plant hormone signal transduction;ko04722//Neurotrophin signaling pathway;ko05162//Measles;ko04620//Toll-like receptor signaling pathway;ko05164//Influenza A;ko05140//Leishmaniasis;ko05152//Tuberculosis;ko04064//NF-kappa B signaling pathway;ko04210//Apoptosis	GO:0005886//plasma membrane;GO:0016021//integral component of membrane;GO:0016023//cytoplasmic, membrane-bounded vesicle;GO:0005739//mitochondrion	GO:0005524//ATP binding;GO:0004674//protein serine/threonine kinase activity	GO:0006468//protein phosphorylation	gi|1002291248|ref|XP_015649962.1|;gi|113623192|dbj|BAF23137.1|/0;0/PREDICTED: probable LRR receptor-like serine/threonine-protein kinase At1g56140 isoform X2 [Oryza sativa Japonica Group];Os08g0203400 [Oryza sativa Japonica Group]
LOC_Os02g43370	2025	35	33	19	2362	52	405	5.66332	5.19284	up	4.3e-08	3.83e-06	-	GO:0016021//integral component of membrane;GO:0005886//plasma membrane	-	GO:0055072//iron ion homeostasis;GO:0006811//ion transport;GO:0055085//transmembrane transport	gi|223635842|sp|Q6H3Z6.2|YSL2_ORYSJ/0/RecName: Full=Metal-nicotianamine transporter YSL2; AltName: Full=Protein YELLOW STRIPE LIKE 2; Short=OsYSL2
LOC_Os03g48770	684	0	2.4	0	57.6	12.65	19.15	0.79256	5.16172	up	7.29e-08	6.04e-06	-	GO:0005618//cell wall;GO:0048046//apoplast;GO:0016023//cytoplasmic, membrane-bounded vesicle	GO:0045735//nutrient reservoir activity;GO:0030145//manganese ion binding;GO:0046564//oxalate decarboxylase activity	GO:0033609//oxalate metabolic process	gi|75243631|sp|Q851K0.1|GL35_ORYSJ/7.18672e-165/RecName: Full=Germin-like protein 3-5; Flags: Precursor
LOC_Os01g42370	4335	2	0	2	5	29	104	1.36506	5.16137	up	7.53e-07	4.4e-05	ko03040//Spliceosome;ko04976//Bile secretion;ko02010//ABC transporters	GO:0005886//plasma membrane;GO:0016021//integral component of membrane	GO:0042626//ATPase activity, coupled to transmembrane movement of substances;GO:0005524//ATP binding	GO:0055085//transmembrane transport	gi|113533069|dbj|BAF05452.1|/0/Os01g0609200 [Oryza sativa Japonica Group]
LOC_Os07g44070	1236	0	1	0	5	24	14	-0.133919	5.07683	up	3.06e-05	0.00102505	-	GO:0016023//cytoplasmic, membrane-bounded vesicle	GO:0016787//hydrolase activity	-	gi|113611918|dbj|BAF22296.1|/1.62058e-166/Os07g0634600 [Oryza sativa Japonica Group]
LOC_Os12g13340	2721	31	48	35	2994	39	239	5.88362	5.01632	up	2.28e-06	0.000114624	-	GO:0044611//nuclear pore inner ring	GO:0017056//structural constituent of nuclear pore	GO:0006999//nuclear pore organization;GO:0000059//protein import into nucleus, docking	gi|108862382|gb|ABG21937.1|;gi|77554105|gb|ABA96901.1|/0;0/expressed protein [Oryza sativa Japonica Group];expressed protein [Oryza sativa Japonica Group]
LOC_Os02g37654	1308	1	4	2	71	79	65	1.96421	5.00878	up	6.38e-23	1.02e-19	ko00564//Glycerophospholipid metabolism;ko04142//Lysosome	-	GO:0008374//O-acyltransferase activity	GO:0006629//lipid metabolic process	gi|113536809|dbj|BAF09192.1|/0/Os02g0589000 [Oryza sativa Japonica Group]
LOC_Os06g01250	1557	3	2	3	94	77	70	2.12669	5.00189	up	6.9e-24	1.32e-20	ko00941//Flavonoid biosynthesis;ko00943//Isoflavonoid biosynthesis;ko01100//Metabolic pathways;ko00909//Sesquiterpenoid and triterpenoid biosynthesis;ko01110//Biosynthesis of secondary metabolites;ko00944//Flavone and flavonol biosynthesis	GO:0016021//integral component of membrane	GO:0016709//oxidoreductase activity, acting on paired donors, with incorporation or reduction of molecular oxygen, NAD(P)H as one donor, and incorporation of one atom of oxygen;GO:0020037//heme binding;GO:0005506//iron ion binding	GO:0044550//secondary metabolite biosynthetic process;GO:0055114//oxidation-reduction process	gi|113594573|dbj|BAF18447.1|/0/Os06g0102100 [Oryza sativa Japonica Group]
LOC_Os01g10110	1698	9	10	13	268	490	186	4.03731	4.99669	up	3.86e-32	2.47e-28	ko00908//Zeatin biosynthesis	GO:0005615//extracellular space	GO:0019139//cytokinin dehydrogenase activity;GO:0016614//oxidoreductase activity, acting on CH-OH group of donors;GO:0050660//flavin adenine dinucleotide binding	GO:0022900//electron transport chain;GO:0009736//cytokinin-activated signaling pathway;GO:0010229//inflorescence development;GO:0009690//cytokinin metabolic process	gi|122219620|sp|Q4ADV8.1|CKX2_ORYSJ/0/RecName: Full=Cytokinin dehydrogenase 2; AltName: Full=Cytokinin oxidase 2; Short=OsCKX2; AltName: Full=QTL grain number 1a; Short=Gn1a; Flags: Precursor
LOC_Os03g05840	669	0	1	0	12	15	13	-0.206773	4.996	up	6.62e-06	0.000285484	-	-	GO:0071949//FAD binding;GO:0004497//monooxygenase activity	GO:0044550//secondary metabolite biosynthetic process;GO:0055114//oxidation-reduction process	gi|108706238|gb|ABF94033.1|/3.34945e-141/monooxygenase, putative, expressed [Oryza sativa Japonica Group]
LOC_Os01g38580	1659	1	0	0	15	6	18	-0.22693	4.99397	up	3.48e-05	0.00112704	ko01100//Metabolic pathways;ko00906//Carotenoid biosynthesis;ko01110//Biosynthesis of secondary metabolites	GO:0009507//chloroplast	GO:0046872//metal ion binding;GO:0016702//oxidoreductase activity, acting on single donors with incorporation of molecular oxygen, incorporation of two atoms of oxygen	GO:1901601//strigolactone biosynthetic process;GO:0010223//secondary shoot formation;GO:0055114//oxidation-reduction process;GO:0016121//carotene catabolic process	gi|125526469|gb|EAY74583.1|/0/hypothetical protein OsI_02472 [Oryza sativa Indica Group]
LOC_Os04g52260	465	6	10	2	271	94	148	3.20812	4.95793	up	3.86e-20	4.62e-17	-	GO:0016023//cytoplasmic, membrane-bounded vesicle	-	-	gi|38568019|emb|CAE05204.3|/1.04172e-41/OSJNBa0070C17.11 [Oryza sativa Japonica Group]
LOC_Os11g26780	495	1	0	5	94	14	60	1.6508	4.92048	up	1.63e-09	2.25e-07	-	-	-	GO:0050896//response to stimulus	gi|122207813|sp|Q2R4Z5.1|DH16B_ORYSJ/1.42691e-45/RecName: Full=Dehydrin Rab16B
LOC_Os07g11790	1623	1	3	5	16	200	44	2.19114	4.89251	up	4.7e-09	5.59e-07	ko00909//Sesquiterpenoid and triterpenoid biosynthesis;ko01110//Biosynthesis of secondary metabolites	-	GO:0000287//magnesium ion binding;GO:0010333//terpene synthase activity	GO:0008152//metabolic process	gi|1002282931|ref|XP_015645760.1|/0/PREDICTED: alpha-humulene synthase isoform X1 [Oryza sativa Japonica Group]
LOC_Os01g12420	2442	2	0	0	7	12	41	0.289317	4.83141	up	2.23e-05	0.00078886	ko05142//Chagas disease (American trypanosomiasis);ko05133//Pertussis;ko05145//Toxoplasmosis;ko04626//Plant-pathogen interaction;ko04075//Plant hormone signal transduction;ko04722//Neurotrophin signaling pathway;ko05162//Measles;ko04620//Toll-like receptor signaling pathway;ko05164//Influenza A;ko05140//Leishmaniasis;ko05152//Tuberculosis;ko04064//NF-kappa B signaling pathway;ko04210//Apoptosis	GO:0016021//integral component of membrane;GO:0016023//cytoplasmic, membrane-bounded vesicle;GO:0005886//plasma membrane	GO:0004674//protein serine/threonine kinase activity;GO:0005524//ATP binding	GO:0006468//protein phosphorylation;GO:0048544//recognition of pollen	gi|113531979|dbj|BAF04362.1|/0/Os01g0223900 [Oryza sativa Japonica Group]
LOC_Os04g10060	2529	1	3	0	1	70	44	1.10011	4.80751	up	1.93e-05	0.000704361	ko00904//Diterpenoid biosynthesis;ko01100//Metabolic pathways;ko01110//Biosynthesis of secondary metabolites	GO:0009536//plastid	GO:0009899//ent-kaurene synthase activity;GO:0034279//syn-pimara-7,15-diene synthase activity;GO:0000287//magnesium ion binding	GO:0051501//diterpene phytoalexin metabolic process;GO:0006952//defense response	gi|122234827|sp|Q0JEZ8.1|KSL4_ORYSJ/0/RecName: Full=Syn-pimara-7,15-diene synthase; AltName: Full=9-beta-pimara-7,15-diene synthase; AltName: Full=Ent-kaurene synthase-like 4; Short=OsKS4; Short=OsKSL4; AltName: Full=OsDTS2
LOC_Os06g01966	1077	2	0	0	22	21	16	0.260984	4.78643	up	2.49e-07	1.78e-05	-	GO:0005886//plasma membrane;GO:0016021//integral component of membrane;GO:0016023//cytoplasmic, membrane-bounded vesicle	GO:0022857//transmembrane transporter activity	GO:0055085//transmembrane transport	gi|113594614|dbj|BAF18488.1|/0/Os06g0109200 [Oryza sativa Japonica Group]
LOC_Os01g60770	756	1	1	0	7	35	18	0.269994	4.77557	up	4.44e-06	0.000204342	-	GO:0005576//extracellular region;GO:0016020//membrane;GO:0016023//cytoplasmic, membrane-bounded vesicle;GO:0005618//cell wall	-	GO:0009664//plant-type cell wall organization	gi|115502192|sp|Q40636.2|EXPA2_ORYSJ/3.6856e-155/RecName: Full=Expansin-A2; AltName: Full=Alpha-expansin-2; AltName: Full=OsEXP2; AltName: Full=OsEXPA2; AltName: Full=OsaEXPa1.23; AltName: Full=RiExB; AltName: Full=RiExC; Flags: Precursor
LOC_Os01g03680	540	0	2	0	4	16	39	0.267464	4.76984	up	5.05e-05	0.00153324	-	GO:0005576//extracellular region;GO:0016023//cytoplasmic, membrane-bounded vesicle	GO:0004867//serine-type endopeptidase inhibitor activity	GO:0010951//negative regulation of endopeptidase activity	gi|113531436|dbj|BAF03819.1|/2.19552e-115/Os01g0127600 [Oryza sativa Japonica Group]
LOC_Os05g24770	756	2	0	1	46	7	25	0.630973	4.7197	up	1.85e-06	9.6e-05	ko00740//Riboflavin metabolism;ko01100//Metabolic pathways;ko00100//Steroid biosynthesis	GO:0016021//integral component of membrane;GO:0005789//endoplasmic reticulum membrane	-	-	gi|113578715|dbj|BAF17078.1|/3.19583e-160/Os05g0312500 [Oryza sativa Japonica Group]
LOC_Os02g48570	1755	10	0	9	297	68	69	2.98139	4.68859	up	8.77e-11	1.65e-08	-	GO:0016021//integral component of membrane	GO:0005215//transporter activity	GO:0006810//transport	gi|42408043|dbj|BAD09179.1|/0/peptide transporter-like [Oryza sativa Japonica Group]
LOC_Os09g39890	3075	0	1	0	12.65	0	18.82	-0.450828	4.68477	up	0.00210453	0.0295506	-	-	-	-	gi|108864290|gb|ABA92873.2|/0/retrotransposon protein, putative, unclassified [Oryza sativa Japonica Group]
LOC_Os11g47600	906	4	3	12	226	120	86	2.96318	4.65053	up	3.03e-19	2.64e-16	ko00500//Starch and sucrose metabolism;ko00520//Amino sugar and nucleotide sugar metabolism;ko01100//Metabolic pathways;ko01110//Biosynthesis of secondary metabolites	GO:0005576//extracellular region;GO:0016023//cytoplasmic, membrane-bounded vesicle	GO:0004568//chitinase activity;GO:0008061//chitin binding	GO:0006032//chitin catabolic process;GO:0045493//xylan catabolic process	gi|62733220|gb|AAX95337.1|/0/chitinase (EC 3.2.1.14) III C10701 - rice [Oryza sativa Japonica Group]
LOC_Os07g11870	1560	3	5	3	35	174	54	2.22725	4.63584	up	1.33e-12	3.7e-10	ko00943//Isoflavonoid biosynthesis;ko00624//Polycyclic aromatic hydrocarbon degradation;ko00903//Limonene and pinene degradation;ko00904//Diterpenoid biosynthesis;ko01120//Microbial metabolism in diverse environments;ko01100//Metabolic pathways;ko00627//Aminobenzoate degradation;ko00945//Stilbenoid, diarylheptanoid and gingerol biosynthesis;ko00363//Bisphenol degradation;ko01110//Biosynthesis of …	GO:0016021//integral component of membrane	GO:0005506//iron ion binding;GO:0016709//oxidoreductase activity, acting on paired donors, with incorporation or reduction of molecular oxygen, NAD(P)H as one donor, and incorporation of one atom of oxygen;GO:0020037//heme binding	GO:0044550//secondary metabolite biosynthetic process;GO:0016102//diterpenoid biosynthetic process;GO:0055114//oxidation-reduction process	gi|113610732|dbj|BAF21110.1|/0/Os07g0218700 [Oryza sativa Japonica Group]
LOC_Os12g43450	717	7	3	13	130	153	233	3.21409	4.63349	up	2.59e-26	6.22e-23	-	GO:0016023//cytoplasmic, membrane-bounded vesicle	-	-	gi|113649843|dbj|BAF30355.1|/1.46517e-144/Os12g0630200 [Oryza sativa Japonica Group]
LOC_Os02g37800	1323	2	0	2	17	27	52	0.891577	4.62326	up	1.77e-09	2.39e-07	ko00564//Glycerophospholipid metabolism;ko04142//Lysosome	-	GO:0008374//O-acyltransferase activity	GO:0006629//lipid metabolic process	gi|113536815|dbj|BAF09198.1|/0/Os02g0590400 [Oryza sativa Japonica Group]
LOC_Os03g50490	1113	0	0	2	23	6	22	0.101692	4.61068	up	2.75e-05	0.000934786	ko00521//Streptomycin biosynthesis;ko00790//Folate biosynthesis;ko04727//GABAergic synapse;ko00910//Nitrogen metabolism;ko00330//Arginine and proline metabolism;ko04724//Glutamatergic synapse;ko01120//Microbial metabolism in diverse environments;ko01100//Metabolic pathways;ko00523//Polyketide sugar unit biosynthesis;ko02020//Two-component system;ko02010//ABC transporters;ko00630//Glyoxylate and d…	GO:0009507//chloroplast	GO:0005524//ATP binding;GO:0004356//glutamate-ammonia ligase activity	GO:0009399//nitrogen fixation;GO:0006542//glutamine biosynthetic process	gi|75317706|sp|Q4W8D0.1|GLN13_ORYSJ/0/RecName: Full=Glutamine synthetase cytosolic isozyme 1-3; AltName: Full=Glutamate--ammonia ligase GLN1;3; Short=OsGLN1;3; AltName: Full=OsGS1;3
LOC_Os09g15480	801	0	0	2	19	7	25	0.100792	4.60798	up	1.97e-05	0.000710607	-	-	-	-	gi|113631104|dbj|BAF24785.1|/3.8077e-112/Os09g0323500 [Oryza sativa Japonica Group]
LOC_Os03g55340	1455	1	1	3	69	9	36	1.13583	4.59559	up	1.4e-07	1.08e-05	-	-	-	-	gi|113549823|dbj|BAF13266.1|/0/Os03g0761300 [Oryza sativa Japonica Group]
LOC_Os03g54750	834	0	1	0	13	8	9	-0.509337	4.59448	up	9.9e-05	0.0026564	-	GO:0005886//plasma membrane;GO:0031225//anchored component of membrane;GO:0016021//integral component of membrane;GO:0016023//cytoplasmic, membrane-bounded vesicle	-	GO:0010215//cellulose microfibril organization;GO:0016049//cell growth	gi|37718803|gb|AAR01674.1|/8.83192e-175/putative phytochelatin synthetase, 3'-partial, partial [Oryza sativa Japonica Group]
LOC_Os07g33954	1119	0	39.9	4.38	429.85	280.38	272.17	4.13866	4.54575	up	3.18e-08	2.98e-06	-	GO:0016021//integral component of membrane	GO:0005215//transporter activity	GO:0034219//carbohydrate transmembrane transport	gi|28564759|dbj|BAC57673.1|/0/putative glucose-6-phosphate/phosphate- translocator precursor [Oryza sativa Japonica Group]
LOC_Os11g41710	1539	0	33	4	232	406	183	3.85824	4.52189	up	7.08e-09	7.85e-07	ko00943//Isoflavonoid biosynthesis;ko00624//Polycyclic aromatic hydrocarbon degradation;ko00903//Limonene and pinene degradation;ko00904//Diterpenoid biosynthesis;ko01120//Microbial metabolism in diverse environments;ko01100//Metabolic pathways;ko00627//Aminobenzoate degradation;ko00945//Stilbenoid, diarylheptanoid and gingerol biosynthesis;ko00363//Bisphenol degradation;ko01110//Biosynthesis of …	GO:0016021//integral component of membrane;GO:0016023//cytoplasmic, membrane-bounded vesicle	GO:0005506//iron ion binding;GO:0016709//oxidoreductase activity, acting on paired donors, with incorporation or reduction of molecular oxygen, NAD(P)H as one donor, and incorporation of one atom of oxygen;GO:0020037//heme binding	GO:0044550//secondary metabolite biosynthetic process;GO:0055114//oxidation-reduction process	gi|77552106|gb|ABA94903.1|/0/Cytochrome P450 family protein, expressed [Oryza sativa Japonica Group]
LOC_Os04g41620	690	12	5	18	199	231	287	3.68483	4.50734	up	3.97e-33	3.8e-29	ko00500//Starch and sucrose metabolism;ko00520//Amino sugar and nucleotide sugar metabolism;ko01100//Metabolic pathways;ko01110//Biosynthesis of secondary metabolites	GO:0016023//cytoplasmic, membrane-bounded vesicle	GO:0004568//chitinase activity;GO:0008061//chitin binding	GO:0006032//chitin catabolic process;GO:0006952//defense response;GO:0051707//response to other organism;GO:0000272//polysaccharide catabolic process;GO:0016998//cell wall macromolecule catabolic process	gi|2055262|dbj|BAA19793.1|/3.00354e-173/chitinase IIb [Oryza sativa Japonica Group]
LOC_Os07g34006	1179	5.16	0	9.8	198.8	18.54	81.33	2.47035	4.50196	up	7.76e-08	6.3e-06	-	GO:0016021//integral component of membrane	GO:0005215//transporter activity	GO:0034219//carbohydrate transmembrane transport	gi|28564759|dbj|BAC57673.1|/0/putative glucose-6-phosphate/phosphate- translocator precursor [Oryza sativa Japonica Group]
LOC_Os04g06230	2322	0	0	1.08	12.08	0	15.74	-0.576069	4.45676	up	0.00286881	0.036921	-	-	-	-	gi|38346267|emb|CAE02087.2|/0/OSJNBa0074B10.17 [Oryza sativa Japonica Group]
LOC_Os07g20430	3864	0	1.32	0	16.39	0	16.13	-0.406278	4.42891	up	0.00196657	0.0282903	-	GO:0016020//membrane	GO:0008270//zinc ion binding;GO:0003676//nucleic acid binding	-	gi|62701678|gb|AAX92751.1|/0/transposon protein, putative, mutator sub-class [Oryza sativa Japonica Group]
LOC_Os03g55090	1776	11	7	12	313	127	131	3.37616	4.40553	up	9.6e-21	1.23e-17	ko00500//Starch and sucrose metabolism;ko04910//Insulin signaling pathway	GO:0009570//chloroplast stroma	GO:0008184//glycogen phosphorylase activity;GO:0030170//pyridoxal phosphate binding	GO:0005980//glycogen catabolic process;GO:0009414//response to water deprivation	gi|190689248|dbj|BAG49328.1|/0/plastidial starch phosphorylase 1 [Oryza sativa Japonica Group]
LOC_Os12g44200	3597	1.2	0	0	12.69	4.04	12.75	-0.517599	4.40274	up	0.00027795	0.00620297	ko00900//Terpenoid backbone biosynthesis;ko00908//Zeatin biosynthesis;ko01100//Metabolic pathways;ko03008//Ribosome biogenesis in eukaryotes;ko01110//Biosynthesis of secondary metabolites;ko03018//RNA degradation	-	GO:0003677//DNA binding;GO:0020037//heme binding;GO:0004601//peroxidase activity;GO:0008270//zinc ion binding	GO:0098869//cellular oxidant detoxification;GO:0006979//response to oxidative stress;GO:0015074//DNA integration;GO:0006310//DNA recombination;GO:0055114//oxidation-reduction process	gi|77556816|gb|ABA99612.1|/0/retrotransposon protein, putative, unclassified [Oryza sativa Japonica Group]
LOC_Os03g04080	348	2	1	3	44	5	65	1.1487	4.35753	up	7.72e-07	4.5e-05	-	-	-	-	gi|108706035|gb|ABF93830.1|/6.95655e-79/expressed protein [Oryza sativa Japonica Group]
LOC_Os12g26290	1857	23	21	37	63	216	1159	4.7111	4.32999	up	2.68e-08	2.61e-06	ko00592//alpha-Linolenic acid metabolism	-	GO:0020037//heme binding;GO:0046872//metal ion binding;GO:0004601//peroxidase activity;GO:0051213//dioxygenase activity	GO:0098869//cellular oxidant detoxification;GO:0055114//oxidation-reduction process;GO:0006979//response to oxidative stress	gi|1002314022|ref|XP_015620387.1|;gi|108862637|gb|ABG22012.1|;gi|133761837|gb|AAF64042.2|AF229813_1;gi|532137998|pdb|4KVJ|A;gi|108862638|gb|ABG22013.1|/0;0;0;0;0/PREDICTED: alpha-dioxygenase 1 isoform X2 [Oryza sativa Japonica Group];alpha-dioxygenase, putative, expressed [Oryza sativa Japonica Group];fatty acid alpha-oxidase [Oryza sativa];Chain A, Crystal Structure Of Oryza Sativa Fatty Acid Al…
LOC_Os03g14250	3123	9	2	7	49	44	223	2.5517	4.29859	up	9.66e-10	1.42e-07	-	-	-	-	gi|108707154|gb|ABF94949.1|/0/expressed protein [Oryza sativa Japonica Group]
LOC_Os08g31860	1158	5	1	13	138	56	131	2.58885	4.262	up	3.33e-14	1.21e-11	-	-	-	-	gi|113623766|dbj|BAF23711.1|/0/Os08g0412800 [Oryza sativa Japonica Group]
LOC_Os08g06190	1689	2	1	0	28	5	24	0.254031	4.25623	up	4.37e-05	0.0013626	-	-	GO:0016491//oxidoreductase activity	-	gi|937928997|dbj|BAT03913.1|/0/Os08g0158400 [Oryza sativa Japonica Group]
LOC_Os11g10860	5940	0	2.12	0	11.92	9.59	21.54	-0.0897152	4.25616	up	4.6e-05	0.00142595	-	GO:0005739//mitochondrion;GO:0005634//nucleus	GO:0008234//cysteine-type peptidase activity;GO:0003677//DNA binding;GO:0046983//protein dimerization activity	GO:0006355//regulation of transcription, DNA-templated;GO:0006508//proteolysis	gi|77549348|gb|ABA92145.1|/0/transposon protein, putative, CACTA, En/Spm sub-class [Oryza sativa Japonica Group]
LOC_Os01g28840	1878	8	2	8	163	44	99	2.50778	4.24813	up	1.68e-13	5.47e-11	-	GO:0016021//integral component of membrane	-	GO:0055085//transmembrane transport	gi|21743361|dbj|BAC03353.1|/0/C4-dicarboxylate transporter-like protein [Oryza sativa Japonica Group]
LOC_Os03g04190	1548	2	1	6	108	12	34	1.55913	4.23904	up	3.05e-07	2.1e-05	ko00941//Flavonoid biosynthesis;ko00624//Polycyclic aromatic hydrocarbon degradation;ko00903//Limonene and pinene degradation;ko01120//Microbial metabolism in diverse environments;ko01100//Metabolic pathways;ko00627//Aminobenzoate degradation;ko00945//Stilbenoid, diarylheptanoid and gingerol biosynthesis;ko00363//Bisphenol degradation;ko01110//Biosynthesis of secondary metabolites;ko00944//Flavon…	GO:0016021//integral component of membrane	GO:0016709//oxidoreductase activity, acting on paired donors, with incorporation or reduction of molecular oxygen, NAD(P)H as one donor, and incorporation of one atom of oxygen;GO:0020037//heme binding;GO:0005506//iron ion binding	GO:0044550//secondary metabolite biosynthetic process;GO:0055114//oxidation-reduction process	gi|937907248|dbj|BAS82168.1|/0/Os03g0134500 [Oryza sativa Japonica Group]
LOC_Os06g11660	975	1	1	0	4	14	22	-0.179727	4.21995	up	0.000198681	0.00476238	-	GO:0016023//cytoplasmic, membrane-bounded vesicle	-	-	gi|1002279412|ref|XP_015644023.1|;gi|222635212|gb|EEE65344.1|/1.307e-172;1.81435e-108/PREDICTED: protein EXORDIUM [Oryza sativa Japonica Group];hypothetical protein OsJ_20619 [Oryza sativa Japonica Group]
LOC_Os02g12680	1503	2	0	5	3	14	100	1.18562	4.19762	up	0.000130138	0.00334074	ko00592//alpha-Linolenic acid metabolism;ko01100//Metabolic pathways	-	GO:0047987//hydroperoxide dehydratase activity;GO:0004497//monooxygenase activity;GO:0005506//iron ion binding;GO:0020037//heme binding;GO:0016705//oxidoreductase activity, acting on paired donors, with incorporation or reduction of molecular oxygen	GO:0031408//oxylipin biosynthetic process;GO:0016125//sterol metabolic process;GO:0055114//oxidation-reduction process	gi|73619654|sp|Q6Z6L1.1|C74A3_ORYSJ/0/RecName: Full=Allene oxide synthase 3; AltName: Full=Cytochrome P450 74A3; AltName: Full=Hydroperoxide dehydrase 3
LOC_Os09g12660	1503	8	16	11	205	114	257	3.40295	4.185	up	6.44e-22	9.5e-19	ko00500//Starch and sucrose metabolism;ko00520//Amino sugar and nucleotide sugar metabolism;ko01100//Metabolic pathways	GO:0005829//cytosol;GO:0009501//amyloplast;GO:0009507//chloroplast	GO:0005524//ATP binding;GO:0008878//glucose-1-phosphate adenylyltransferase activity	GO:0019252//starch biosynthetic process;GO:0005978//glycogen biosynthetic process	gi|50725092|dbj|BAD33225.1|/0/ADP-glucose pyrophosphorylase small subunit [Oryza sativa Japonica Group]
LOC_Os04g52250	609	2	2	0	23	27	22	0.533438	4.18423	up	5.34e-08	4.57e-06	-	-	-	-	gi|38568018|emb|CAE05203.3|/1.13746e-46/OSJNBa0070C17.10 [Oryza sativa Japonica Group]
LOC_Os02g15560	2226	10.43	4	13	196.18	71.68	162.07	2.9919	4.13767	up	5.61e-17	3.84e-14	ko04120//Ubiquitin mediated proteolysis	-	GO:0003677//DNA binding;GO:0008270//zinc ion binding;GO:0004803//transposase activity	GO:0006313//transposition, DNA-mediated	gi|53982305|gb|AAV25284.1|/0/hypothetical protein [Oryza sativa Japonica Group]
LOC_Os03g04240	678	1	1	0	8	19	11	-0.240961	4.1325	up	9.17e-05	0.00249495	ko00980//Metabolism of xenobiotics by cytochrome P450;ko05200//Pathways in cancer;ko00480//Glutathione metabolism;ko00982//Drug metabolism - cytochrome P450;ko05215//Prostate cancer	GO:0005737//cytoplasm	GO:0004364//glutathione transferase activity	GO:0006749//glutathione metabolic process	gi|46276329|gb|AAS86423.1|/1.1382e-169/glutathione S-transferase GSTF15 [Oryza sativa Japonica Group]
LOC_Os01g70180	1170	1	0	1	16	10	11	-0.261923	4.12989	up	7.13e-05	0.00204084	-	GO:0000139//Golgi membrane;GO:0016021//integral component of membrane;GO:0016023//cytoplasmic, membrane-bounded vesicle	GO:0016757//transferase activity, transferring glycosyl groups	GO:0071555//cell wall organization	gi|125528940|gb|EAY77054.1|;gi|75159223|sp|Q8S1X9.1|GT13_ORYSJ/0;0/hypothetical protein OsI_05011 [Oryza sativa Indica Group];RecName: Full=Probable glucuronosyltransferase Os01g0926400; AltName: Full=OsGT47D
LOC_Os09g17660	603	0	1	1	9	11	17	-0.261771	4.1171	up	8.37e-05	0.00232626	-	-	-	-	gi|255678809|dbj|BAH94518.1|/1.03167e-135/Os09g0345500 [Oryza sativa Japonica Group]
LOC_Os04g10980	5763	2.22	0	0	11.72	5.26	22.27	-0.187051	4.10323	up	0.000254955	0.00575179	-	GO:0005739//mitochondrion;GO:0005634//nucleus	GO:0008234//cysteine-type peptidase activity;GO:0003677//DNA binding;GO:0046983//protein dimerization activity	GO:0006355//regulation of transcription, DNA-templated;GO:0006508//proteolysis	gi|108710048|gb|ABF97843.1|/0/transposon protein, putative, CACTA, En/Spm sub-class [Oryza sativa Japonica Group]
LOC_Os06g48200	873	1	1	0	7	17	13	-0.267754	4.09856	up	0.000113038	0.00295719	ko04075//Plant hormone signal transduction	GO:0005618//cell wall;GO:0048046//apoplast;GO:0016023//cytoplasmic, membrane-bounded vesicle	GO:0004553//hydrolase activity, hydrolyzing O-glycosyl compounds;GO:0016762//xyloglucan:xyloglucosyl transferase activity	GO:0071555//cell wall organization;GO:0010411//xyloglucan metabolic process;GO:0042546//cell wall biogenesis	gi|113596499|dbj|BAF20373.1|/0/Os06g0697000 [Oryza sativa Japonica Group]
LOC_Os07g37730	1689	1	3	7	35	39	99	1.71365	4.09846	up	1.25e-10	2.29e-08	ko00564//Glycerophospholipid metabolism;ko00260//Glycine, serine and threonine metabolism;ko00061//Fatty acid biosynthesis;ko01120//Microbial metabolism in diverse environments;ko01100//Metabolic pathways;ko00640//Propanoate metabolism;ko02020//Two-component system;ko00620//Pyruvate metabolism;ko00190//Oxidative phosphorylation;ko01110//Biosynthesis of secondary metabolites	GO:0005739//mitochondrion	GO:0008137//NADH dehydrogenase (ubiquinone) activity	GO:0055114//oxidation-reduction process	gi|113611539|dbj|BAF21917.1|/0/Os07g0564500 [Oryza sativa Japonica Group]
LOC_Os07g33910	855	3.84	7.1	3.82	113.35	58.08	60.51	2.1182	4.09259	up	1.96e-15	9.83e-13	-	GO:0016021//integral component of membrane	GO:0005215//transporter activity	GO:0034219//carbohydrate transmembrane transport	gi|937926912|dbj|BAT01829.1|/2.8298e-141/Os07g0523400 [Oryza sativa Japonica Group]
LOC_Os10g35460	1278	10	24	15	539	112	95	3.78301	4.07346	up	2.81e-10	4.68e-08	-	GO:0005886//plasma membrane;GO:0031225//anchored component of membrane;GO:0016021//integral component of membrane;GO:0016023//cytoplasmic, membrane-bounded vesicle	-	GO:0010215//cellulose microfibril organization;GO:0016049//cell growth	gi|75162257|sp|Q8W3E8.1|COBL4_ORYSJ/0/RecName: Full=COBRA-like protein 4; AltName: Full=Protein BRITTLE CULM1-like 9; Flags: Precursor
LOC_Os08g04540	1545	6	11	11	154	156	115	2.95929	4.05125	up	9.87e-27	2.7e-23	ko01100//Metabolic pathways;ko00950//Isoquinoline alkaloid biosynthesis;ko00350//Tyrosine metabolism;ko01110//Biosynthesis of secondary metabolites	-	GO:0030170//pyridoxal phosphate binding;GO:0016831//carboxy-lyase activity	GO:0006520//cellular amino acid metabolic process	gi|113622937|dbj|BAF22882.1|/0/Os08g0140300 [Oryza sativa Japonica Group]
LOC_Os03g56060	1374	1	0	7	63	12	45	1.22826	4.04663	up	7.12e-07	4.2e-05	-	GO:0016021//integral component of membrane;GO:0000139//Golgi membrane	GO:0016757//transferase activity, transferring glycosyl groups	GO:0071555//cell wall organization	gi|108711292|gb|ABF99087.1|/0/glycosyl transferase, group 2 family protein, expressed [Oryza sativa Japonica Group]
LOC_Os04g50940	1728	1	0	1	4	21	9	-0.363403	3.97542	up	0.000571749	0.0109968	-	GO:0016021//integral component of membrane	GO:0005215//transporter activity	GO:0006810//transport	gi|113565308|dbj|BAF15651.1|;gi|39545859|emb|CAE03937.3|/0;0/Os04g0597600 [Oryza sativa Japonica Group];OSJNba0093F12.11 [Oryza sativa Japonica Group]
LOC_Os04g06590	2256	32	3	19	395	70	269	3.77207	3.96772	up	2.52e-09	3.18e-07	-	GO:0016021//integral component of membrane;GO:0016023//cytoplasmic, membrane-bounded vesicle	-	-	gi|1002265641|ref|XP_015637155.1|/0/PREDICTED: uncharacterized protein LOC4335022 [Oryza sativa Japonica Group]
LOC_Os03g07180	1203	11	1	7	172	16	73	2.30829	3.96296	up	3.4e-07	2.28e-05	-	GO:0016023//cytoplasmic, membrane-bounded vesicle	-	-	gi|108706383|gb|ABF94178.1|;gi|222624261|gb|EEE58393.1|/1.34282e-24;1.87398e-24/Late embryogenesis abundant protein, expressed [Oryza sativa Japonica Group];hypothetical protein OsJ_09557 [Oryza sativa Japonica Group]
LOC_Os01g04050	303	13	19	6	176	87	266	3.29942	3.9408	up	3.4e-15	1.55e-12	-	GO:0016021//integral component of membrane;GO:0016023//cytoplasmic, membrane-bounded vesicle;GO:0005576//extracellular region	GO:0008233//peptidase activity;GO:0004867//serine-type endopeptidase inhibitor activity	GO:0010951//negative regulation of endopeptidase activity	gi|15887006|dbj|BAB69446.1|/1.11596e-57/wound induced protein homolog [Oryza sativa]
LOC_Os12g40810	5727	0	0	1.98	14.06	3.69	13.86	-0.421604	3.93852	up	0.000822783	0.014787	ko03440//Homologous recombination;ko00240//Pyrimidine metabolism;ko01100//Metabolic pathways;ko03460//Fanconi anemia pathway;ko02020//Two-component system;ko02010//ABC transporters;ko00670//One carbon pool by folate	GO:0009536//plastid	GO:0004523//RNA-DNA hybrid ribonuclease activity;GO:0003964//RNA-directed DNA polymerase activity;GO:0003677//DNA binding;GO:0003723//RNA binding	GO:0090502//RNA phosphodiester bond hydrolysis, endonucleolytic;GO:0006278//RNA-dependent DNA biosynthetic process;GO:0015074//DNA integration;GO:0006310//DNA recombination	gi|77556987|gb|ABA99783.1|/0/retrotransposon protein, putative, unclassified [Oryza sativa Japonica Group]
LOC_Os01g04160	2658	1	2	1	34	4	21	0.314617	3.92951	up	0.000118345	0.00307921	-	-	-	-	gi|1002226262|ref|XP_015625985.1|/0/PREDICTED: uncharacterized protein LOC4325802 [Oryza sativa Japonica Group]
LOC_Os07g04560	1032	5	3	8	83	64	74	2.05601	3.91906	up	3.72e-18	2.86e-15	-	GO:0005634//nucleus	GO:0003677//DNA binding	GO:0006355//regulation of transcription, DNA-templated	gi|1002284392|ref|XP_015646514.1|/0/PREDICTED: transcription factor JUNGBRUNNEN 1-like [Oryza sativa Japonica Group]
LOC_Os02g02230	1581	51	3	49	35	109	1189	4.63301	3.91704	up	0.000191157	0.00460507	ko01100//Metabolic pathways;ko00100//Steroid biosynthesis;ko01110//Biosynthesis of secondary metabolites	GO:0005886//plasma membrane;GO:0005783//endoplasmic reticulum	GO:0008398//sterol 14-demethylase activity;GO:0046872//metal ion binding	GO:0016126//sterol biosynthetic process	gi|255670543|dbj|BAF07575.2|/0/Os02g0113200 [Oryza sativa Japonica Group]
LOC_Os05g50380	1560	49	132	30	1075	823	1034	5.74217	3.91018	up	1.53e-16	9.44e-14	ko00500//Starch and sucrose metabolism;ko00520//Amino sugar and nucleotide sugar metabolism;ko01100//Metabolic pathways	GO:0009501//amyloplast;GO:0009507//chloroplast	GO:0005524//ATP binding;GO:0008878//glucose-1-phosphate adenylyltransferase activity	GO:0019252//starch biosynthetic process;GO:0005978//glycogen biosynthetic process	gi|169244411|gb|ACA50479.1|/0/ADP-glucose pyrophosphorylase large subunit [Oryza sativa Japonica Group]
LOC_Os05g12040	1503	0	5	9	15	32	143	1.8601	3.90026	up	5.65e-06	0.000250032	ko01100//Metabolic pathways;ko00100//Steroid biosynthesis;ko01110//Biosynthesis of secondary metabolites	GO:0005886//plasma membrane;GO:0005783//endoplasmic reticulum	GO:0008398//sterol 14-demethylase activity;GO:0005506//iron ion binding;GO:0020037//heme binding	GO:0070988//demethylation;GO:0016126//sterol biosynthetic process;GO:0055114//oxidation-reduction process	gi|1002267674|ref|XP_015638157.1|/0/PREDICTED: obtusifoliol 14-alpha demethylase [Oryza sativa Japonica Group]
LOC_Os07g03710	507	2	1	0	8	11	26	-0.0220466	3.90007	up	0.000133875	0.00340476	ko04626//Plant-pathogen interaction;ko04075//Plant hormone signal transduction	GO:0005576//extracellular region;GO:0016023//cytoplasmic, membrane-bounded vesicle	-	-	gi|937924997|dbj|BAS99913.1|/1.00022e-91/Os07g0129200, partial [Oryza sativa Japonica Group]
LOC_Os01g72270	1650	9	0	41	256	63	317	3.57183	3.89102	up	4.26e-06	0.000196965	ko00624//Polycyclic aromatic hydrocarbon degradation;ko00903//Limonene and pinene degradation;ko00073//Cutin, suberine and wax biosynthesis;ko01120//Microbial metabolism in diverse environments;ko01100//Metabolic pathways;ko00627//Aminobenzoate degradation;ko00945//Stilbenoid, diarylheptanoid and gingerol biosynthesis;ko00363//Bisphenol degradation;ko01110//Biosynthesis of secondary metabolites	GO:0016023//cytoplasmic, membrane-bounded vesicle	GO:0005488;GO:0016491//oxidoreductase activity	-	gi|19386832|dbj|BAB86210.1|/0/putative cytochrome P450-dependent fatty acid hydroxylase [Oryza sativa Japonica Group]
LOC_Os03g22210	549	0	1	1	20	1	10	-0.436663	3.89102	up	0.00272103	0.0356167	-	GO:0016023//cytoplasmic, membrane-bounded vesicle	-	-	gi|108708069|gb|ABF95864.1|/9.37861e-75/expressed protein [Oryza sativa Japonica Group]
LOC_Os10g25090	2160	2	1	6	65	15	41	1.24721	3.88245	up	7.14e-08	5.95e-06	ko04626//Plant-pathogen interaction	GO:0016021//integral component of membrane	GO:0004672//protein kinase activity;GO:0005524//ATP binding	GO:0006468//protein phosphorylation	gi|113639111|dbj|BAF26416.1|/0/Os10g0389800 [Oryza sativa Japonica Group]
LOC_Os04g32850	801	6	0	3	54	22	45	1.24276	3.87548	up	4.12e-09	5e-07	-	GO:0005737//cytoplasm	GO:0046914//transition metal ion binding	GO:0046916//cellular transition metal ion homeostasis;GO:0030001//metal ion transport	gi|113564256|dbj|BAF14599.1|/1.50306e-24/Os04g0401000 [Oryza sativa Japonica Group]
LOC_Os01g54030	1758	5	5	18	203	24	133	2.76699	3.87055	up	3.6e-08	3.3e-06	ko03320//PPAR signaling pathway;ko00710//Carbon fixation in photosynthetic organisms;ko01120//Microbial metabolism in diverse environments;ko01100//Metabolic pathways;ko00620//Pyruvate metabolism	-	GO:0046872//metal ion binding;GO:0004471//malate dehydrogenase (decarboxylating) (NAD+) activity;GO:0051287//NAD binding	GO:0006108//malate metabolic process;GO:0055114//oxidation-reduction process	gi|38261493|gb|AAR15892.1|/0/cytosolic NADP malic enzyme [Oryza sativa Indica Group]
LOC_Os01g42190	594	1	1	1	21	10	12	-0.0717511	3.83765	up	7.14e-05	0.00204084	-	GO:0005739//mitochondrion	-	-	gi|53792186|dbj|BAD52819.1|/1.50352e-133/heat shock-like protein [Oryza sativa Japonica Group]
LOC_Os06g51050	963	3	1	22	26	108	193	2.60669	3.82519	up	2.32e-06	0.000115821	ko00500//Starch and sucrose metabolism;ko00520//Amino sugar and nucleotide sugar metabolism;ko01100//Metabolic pathways;ko01110//Biosynthesis of secondary metabolites	GO:0016023//cytoplasmic, membrane-bounded vesicle	GO:0008843//endochitinase activity;GO:0008061//chitin binding;GO:0016231//beta-N-acetylglucosaminidase activity	GO:0006032//chitin catabolic process;GO:0016998//cell wall macromolecule catabolic process;GO:0050832//defense response to fungus;GO:0000272//polysaccharide catabolic process	gi|82654928|sp|P24626.2|CHI3_ORYSJ/0/RecName: Full=Chitinase 3; AltName: Full=Basic endochitinase 1; AltName: Full=Class I chitinase c; Short=OsChia1c; AltName: Full=Pathogenesis related (PR)-3 chitinase 3; Flags: Precursor
LOC_Os08g41890	1467	2	1	1	25	8	21	0.207763	3.80315	up	3.12e-05	0.00103574	-	-	GO:0008017//microtubule binding	GO:0000226//microtubule cytoskeleton organization;GO:0000910//cytokinesis	gi|113624300|dbj|BAF24245.1|/0/Os08g0531100 [Oryza sativa Japonica Group]
LOC_Os01g56810	1605	2	0	0	12	4	13	-0.508078	3.79518	up	0.00112437	0.0188305	ko00908//Zeatin biosynthesis	GO:0005615//extracellular space;GO:0016023//cytoplasmic, membrane-bounded vesicle	GO:0050660//flavin adenine dinucleotide binding;GO:0016614//oxidoreductase activity, acting on CH-OH group of donors;GO:0019139//cytokinin dehydrogenase activity	GO:0009690//cytokinin metabolic process;GO:0022900//electron transport chain	gi|1002226254|ref|XP_015625931.1|;gi|75252917|sp|Q5ZAY9.1|CKX5_ORYSJ/8.52167e-139;0/PREDICTED: cytokinin dehydrogenase 5 isoform X2 [Oryza sativa Japonica Group];RecName: Full=Cytokinin dehydrogenase 5; AltName: Full=Cytokinin oxidase 5; Short=OsCKX5; Flags: Precursor
LOC_Os07g17350	2175	0	0	2.06	11.89	1.18	16.15	-0.495958	3.7911	up	0.00357878	0.043879	-	-	GO:0003677//DNA binding;GO:0008234//cysteine-type peptidase activity	GO:0006508//proteolysis	gi|38678223|tpg|DAA02091.1|/0/TPA_exp: transposase [Oryza sativa]
LOC_Os02g16940	2208	5	10	5	135	44	70	2.24418	3.77043	up	6.59e-12	1.52e-09	-	GO:0005618//cell wall;GO:0016023//cytoplasmic, membrane-bounded vesicle	GO:0004252//serine-type endopeptidase activity	-	gi|113536048|dbj|BAF08431.1|/0/Os02g0269600 [Oryza sativa Japonica Group]
LOC_Os01g24710	438	23	9	134	155	126	1639	5.16933	3.76459	up	0.000112861	0.00295719	-	-	GO:0030246//carbohydrate binding	-	gi|122222563|sp|Q0JMY8.1|SALT_ORYSJ/3.77537e-100/RecName: Full=Salt stress-induced protein; Short=Salt protein; AltName: Full=Protein lectin-like; AltName: Full=Protein mannose-binding lectin
LOC_Os11g44830	5049	3.59	0	0	30.96	7.12	9.1	0.0464638	3.76132	up	0.000448011	0.0090138	-	-	GO:0004386//helicase activity	GO:0006259//DNA metabolic process;GO:0044763;GO:0051276//chromosome organization;GO:0044710	gi|77552439|gb|ABA95236.1|/0/AT hook motif-containing protein, putative, expressed [Oryza sativa Japonica Group]
LOC_Os06g37300	1533	20	76	20	421	778	279	4.73754	3.75084	up	9.76e-13	2.79e-10	ko00904//Diterpenoid biosynthesis;ko01100//Metabolic pathways;ko01110//Biosynthesis of secondary metabolites	GO:0016021//integral component of membrane;GO:0016023//cytoplasmic, membrane-bounded vesicle;GO:0009707//chloroplast outer membrane;GO:0005783//endoplasmic reticulum	GO:0052615//ent-kaurene oxidase activity;GO:0052616//ent-kaur-16-en-19-ol oxidase activity;GO:0020037//heme binding;GO:0005506//iron ion binding;GO:0052617//ent-kaur-16-en-19-al oxidase activity	GO:0051502;GO:0009686//gibberellin biosynthetic process;GO:0009740//gibberellic acid mediated signaling pathway;GO:0016032//viral process;GO:0010241//ent-kaurene oxidation to kaurenoic acid	gi|122168094|sp|Q0DBF4.1|C7018_ORYSJ;gi|53792007|dbj|BAD54592.1|/0;6.98243e-172/RecName: Full=Ent-sandaracopimaradiene 3-hydroxylase; AltName: Full=Cytochrome P450 701A8; AltName: Full=Ent-kaurene oxidase 4; Short=OsKO4; AltName: Full=Ent-kaurene oxidase-like 4; Short=OsKOL4; AltName: Full=OsKOS1;putative ent-kaurene oxidase [Oryza sativa Japonica Group]
LOC_Os03g57640	1083	17	3	33	190	164	273	3.54192	3.74604	up	3.78e-15	1.68e-12	ko04075//Plant hormone signal transduction	-	GO:0016787//hydrolase activity	GO:0008152//metabolic process	gi|113549986|dbj|BAF13429.1|/0/Os03g0790500 [Oryza sativa Japonica Group]
LOC_Os02g53130	2670	2	0	8	84	26	8	1.21731	3.70669	up	4.89e-05	0.00150121	ko00910//Nitrogen metabolism;ko00591//Linoleic acid metabolism;ko01120//Microbial metabolism in diverse environments;ko01100//Metabolic pathways;ko00920//Sulfur metabolism	-	GO:0009703//nitrate reductase (NADH) activity;GO:0050464//nitrate reductase (NADPH) activity;GO:0030151//molybdenum ion binding;GO:0020037//heme binding;GO:0050463;GO:0043546//molybdopterin cofactor binding	GO:0006809//nitric oxide biosynthetic process;GO:0042128//nitrate assimilation;GO:0022900//electron transport chain	gi|113537784|dbj|BAF10167.1|/0/Os02g0770800 [Oryza sativa Japonica Group]
LOC_Os11g03960	4317	1.69	0	1.29	21.4	1.89	14.72	-0.198728	3.70527	up	0.0016371	0.0247775	-	-	GO:0003677//DNA binding;GO:0008234//cysteine-type peptidase activity	GO:0006508//proteolysis	gi|77548609|gb|ABA91406.1|/0/transposon protein, putative, CACTA, En/Spm sub-class [Oryza sativa Japonica Group]
LOC_Os02g43390	5283	3.84	1	0	37.61	4.31	17.24	0.331926	3.6922	up	0.000236182	0.00541102	ko05166//HTLV-I infection;ko04115//p53 signaling pathway;ko03440//Homologous recombination;ko00240//Pyrimidine metabolism;ko04110//Cell cycle;ko00908//Zeatin biosynthesis;ko05202//Transcriptional misregulation in cancer;ko01100//Metabolic pathways;ko03460//Fanconi anemia pathway;ko02020//Two-component system;ko04064//NF-kappa B signaling pathway;ko02010//ABC transporters;ko01110//Biosynthesis of …	GO:0016023//cytoplasmic, membrane-bounded vesicle	GO:0003676//nucleic acid binding;GO:0004190//aspartic-type endopeptidase activity;GO:0008270//zinc ion binding	GO:0006508//proteolysis;GO:0015074//DNA integration	gi|116310101|emb|CAH67121.1|/0/H0502G05.12 [Oryza sativa Indica Group]
LOC_Os01g31840	3963	0	1.47	2.92	35.62	0	17.7	0.208226	3.68282	up	0.0036554	0.0445899	ko05166//HTLV-I infection;ko04115//p53 signaling pathway;ko04110//Cell cycle;ko00908//Zeatin biosynthesis;ko05202//Transcriptional misregulation in cancer;ko01100//Metabolic pathways;ko03008//Ribosome biogenesis in eukaryotes;ko04064//NF-kappa B signaling pathway;ko01110//Biosynthesis of secondary metabolites;ko04210//Apoptosis;ko03018//RNA degradation	-	GO:0003676//nucleic acid binding;GO:0008270//zinc ion binding	GO:0015074//DNA integration	gi|62734723|gb|AAX96832.1|/0/retrotransposon protein, putative, Ty1-copia sub-class [Oryza sativa Japonica Group]
LOC_Os04g33820	936	3	1	5	41	10	54	1.07278	3.68162	up	9.35e-07	5.32e-05	ko04075//Plant hormone signal transduction	GO:0016021//integral component of membrane	-	-	gi|32479726|emb|CAE01513.1|/0/OJ991214_12.2 [Oryza sativa Japonica Group]
LOC_Os11g06770	957	1	0	2	12	7	19	-0.203764	3.67892	up	0.000370801	0.00771202	-	-	-	-	gi|937937932|dbj|BAT12845.1|;gi|125533543|gb|EAY80091.1|/6.39865e-79;4.62515e-86/Os11g0168500 [Oryza sativa Japonica Group];hypothetical protein OsI_35260 [Oryza sativa Indica Group]
LOC_Os04g12950	1266	3	0	2	15	9	36	0.345964	3.67277	up	3.95e-05	0.00124748	-	GO:0009536//plastid;GO:0005739//mitochondrion	GO:0080043//quercetin 3-O-glucosyltransferase activity;GO:0080044//quercetin 7-O-glucosyltransferase activity	GO:0009813//flavonoid biosynthetic process;GO:0052696//flavonoid glucuronidation	gi|125589416|gb|EAZ29766.1|/0/hypothetical protein OsJ_13824 [Oryza sativa Japonica Group]
LOC_Os11g06980	1887	8	1	12	5	25	204	2.17124	3.66971	up	0.000288507	0.00638109	-	GO:0005794//Golgi apparatus	-	-	gi|1002304339|ref|XP_015615529.1|/0/PREDICTED: BURP domain-containing protein 17 [Oryza sativa Japonica Group]
LOC_Os07g05940	1749	28	3	60	214	187	595	4.21899	3.66136	up	4.82e-08	4.2e-06	ko01100//Metabolic pathways;ko00906//Carotenoid biosynthesis;ko01110//Biosynthesis of secondary metabolites	GO:0009570//chloroplast stroma	GO:0046872//metal ion binding;GO:0045549//9-cis-epoxycarotenoid dioxygenase activity	GO:0055114//oxidation-reduction process;GO:0009688//abscisic acid biosynthetic process	gi|1002283127|ref|XP_015645858.1|/0/PREDICTED: LOW QUALITY PROTEIN: 9-cis-epoxycarotenoid dioxygenase 1, chloroplastic [Oryza sativa Japonica Group]
LOC_Os04g14690	1566	7	3	1	75	18	34	1.32667	3.65723	up	2.06e-07	1.51e-05	ko00680//Methane metabolism;ko01120//Microbial metabolism in diverse environments;ko00380//Tryptophan metabolism;ko00982//Drug metabolism - cytochrome P450	-	GO:0050660//flavin adenine dinucleotide binding;GO:0004499//N,N-dimethylaniline monooxygenase activity;GO:0050661//NADP binding	GO:0055114//oxidation-reduction process	gi|38344124|emb|CAD39837.2|/0/OSJNBb0072N21.3 [Oryza sativa Japonica Group]
LOC_Os12g15680	1797	3	3	17	42	120	102	2.30492	3.6565	up	1.67e-10	3.02e-08	ko01100//Metabolic pathways;ko00053//Ascorbate and aldarate metabolism	GO:0048046//apoplast;GO:0016023//cytoplasmic, membrane-bounded vesicle	GO:0016722//oxidoreductase activity, oxidizing metal ions;GO:0005507//copper ion binding;GO:0052716//hydroquinone:oxygen oxidoreductase activity	GO:0046274//lignin catabolic process;GO:0055114//oxidation-reduction process	gi|937941668|dbj|BAT16580.1|/0/Os12g0258700 [Oryza sativa Japonica Group]
LOC_Os03g63970	1119	3	6	4	28	63	61	1.54905	3.64532	up	2.81e-11	5.73e-09	ko00904//Diterpenoid biosynthesis;ko01100//Metabolic pathways;ko01110//Biosynthesis of secondary metabolites	-	GO:0045544//gibberellin 20-oxidase activity;GO:0005506//iron ion binding	GO:0055114//oxidation-reduction process;GO:0009416//response to light stimulus;GO:0009908//flower development;GO:0009686//gibberellin biosynthetic process;GO:0009740//gibberellic acid mediated signaling pathway;GO:0009826//unidimensional cell growth	gi|113550422|dbj|BAF13865.1|/0/Os03g0856700 [Oryza sativa Japonica Group]
LOC_Os10g38940	879	1	5	0	26	40	8	0.58925	3.63847	up	4.85e-05	0.00149367	ko00906//Carotenoid biosynthesis	GO:0016021//integral component of membrane	GO:0016491//oxidoreductase activity;GO:0005506//iron ion binding	GO:0006633//fatty acid biosynthetic process;GO:0055114//oxidation-reduction process	gi|113639764|dbj|BAF27069.1|/1.02885e-142/Os10g0533500 [Oryza sativa Japonica Group]
LOC_Os05g33130	1023	20	4	43	131	172	398	3.71567	3.57949	up	8.84e-10	1.32e-07	ko00500//Starch and sucrose metabolism;ko00520//Amino sugar and nucleotide sugar metabolism;ko01100//Metabolic pathways;ko01110//Biosynthesis of secondary metabolites	GO:0016023//cytoplasmic, membrane-bounded vesicle;GO:0005576//extracellular region	GO:0008061//chitin binding;GO:0004568//chitinase activity	GO:0006032//chitin catabolic process;GO:0016998//cell wall macromolecule catabolic process;GO:0050832//defense response to fungus;GO:0000272//polysaccharide catabolic process	gi|146386456|pdb|2DKV|A/0/Chain A, Crystal Structure Of Class I Chitinase From Oryza Sativa L. Japonica
LOC_Os05g47690	663	1	1	3	14	14	29	0.283213	3.5792	up	2.69e-05	0.000921918	ko00740//Riboflavin metabolism;ko01100//Metabolic pathways;ko00100//Steroid biosynthesis	GO:0016021//integral component of membrane;GO:0005789//endoplasmic reticulum membrane	-	-	gi|937920290|dbj|BAS95208.1|/2.68333e-161/Os05g0550250 [Oryza sativa Japonica Group]
LOC_Os08g01370	291	1	0	3	25	2	18	0.00767863	3.57381	up	0.00189188	0.0276317	-	-	-	-	gi|113622747|dbj|BAF22692.1|/1.67855e-65/Os08g0104400 [Oryza sativa Japonica Group]
LOC_Os11g26570	981	12	0	15	162	32	86	2.42842	3.5699	up	5.3e-07	3.3e-05	-	-	-	-	gi|62733137|gb|AAX95254.1|/2.16673e-45/embryogenic-cell protein 40 (ecp40) [Oryza sativa Japonica Group]
LOC_Os05g50570	1341	23	4	40	217	67	399	3.69704	3.56106	up	7.31e-08	6.04e-06	-	GO:0016023//cytoplasmic, membrane-bounded vesicle	GO:0004185//serine-type carboxypeptidase activity	GO:0051603//proteolysis involved in cellular protein catabolic process	gi|937920620|dbj|BAS95538.1|/0/Os05g0582500 [Oryza sativa Japonica Group]
LOC_Os07g35300	1803	5	3	4	62	38	30	1.35309	3.55483	up	2.07e-10	3.64e-08	ko05142//Chagas disease (American trypanosomiasis);ko05133//Pertussis;ko05145//Toxoplasmosis;ko04626//Plant-pathogen interaction;ko04722//Neurotrophin signaling pathway;ko05162//Measles;ko04620//Toll-like receptor signaling pathway;ko05164//Influenza A;ko05140//Leishmaniasis;ko05152//Tuberculosis;ko04064//NF-kappa B signaling pathway;ko04210//Apoptosis	GO:0009506//plasmodesma;GO:0005886//plasma membrane	GO:0004674//protein serine/threonine kinase activity	GO:0006952//defense response;GO:0006468//protein phosphorylation	gi|28411831|dbj|BAC57306.1|/0/serine/threonine kinase receptor precursor-like protein [Oryza sativa Japonica Group]
LOC_Os01g32670	345	0	1	2	12	6	17	-0.288039	3.55178	up	0.000668526	0.0124826	-	-	-	-	gi|113532696|dbj|BAF05079.1|/1.27497e-65/Os01g0510200 [Oryza sativa Japonica Group]
LOC_Os05g10390	3150	1.42	1.05	0	14.55	1.06	13.44	-0.486753	3.5373	up	0.0028105	0.0363904	-	-	GO:0003677//DNA binding;GO:0008234//cysteine-type peptidase activity	GO:0006508//proteolysis	gi|53749279|gb|AAU90138.1|/0/putative polyprotein [Oryza sativa Japonica Group]
LOC_Os02g21810	1515	2	11	2	35	87	43	1.6603	3.5283	up	8.06e-09	8.79e-07	ko01100//Metabolic pathways;ko00100//Steroid biosynthesis;ko01110//Biosynthesis of secondary metabolites	GO:0016023//cytoplasmic, membrane-bounded vesicle;GO:0005783//endoplasmic reticulum;GO:0005886//plasma membrane	GO:0008398//sterol 14-demethylase activity;GO:0020037//heme binding;GO:0008168//methyltransferase activity;GO:0005506//iron ion binding	GO:0055114//oxidation-reduction process;GO:0032259//methylation;GO:0070988//demethylation;GO:0016126//sterol biosynthetic process	gi|113536224|dbj|BAF08607.1|/0/Os02g0323600 [Oryza sativa Japonica Group]
LOC_Os03g05880	951	2	12	3	44	60	79	1.82077	3.528	up	8.36e-11	1.59e-08	ko01100//Metabolic pathways;ko00906//Carotenoid biosynthesis;ko01110//Biosynthesis of secondary metabolites	-	GO:0071949//FAD binding;GO:0004497//monooxygenase activity	GO:0044550//secondary metabolite biosynthetic process;GO:0055114//oxidation-reduction process	gi|108706242|gb|ABF94037.1|/0/FAD binding domain containing protein, expressed [Oryza sativa Japonica Group]
LOC_Os01g34560	1437	1	3	0	5	24	17	0.0146149	3.51008	up	0.000474471	0.00937985	ko01110//Biosynthesis of secondary metabolites;ko00062//Fatty acid elongation	GO:0016021//integral component of membrane	GO:0016747//transferase activity, transferring acyl groups other than amino-acyl groups	GO:0006633//fatty acid biosynthetic process	gi|113532766|dbj|BAF05149.1|/0/Os01g0529800, partial [Oryza sativa Japonica Group]
LOC_Os01g39020	1209	5	3	0	39	6	39	0.793666	3.50436	up	7.54e-05	0.00214232	-	GO:0005739//mitochondrion;GO:0005634//nucleus	GO:0044212//transcription regulatory region DNA binding;GO:0043565//sequence-specific DNA binding;GO:0005515//protein binding;GO:0003700//transcription factor activity, sequence-specific DNA binding	GO:0045893//positive regulation of transcription, DNA-templated;GO:0071456//cellular response to hypoxia;GO:0034620//cellular response to unfolded protein;GO:0010286//heat acclimation;GO:0010200//response to chitin;GO:0034605//cellular response to heat;GO:0009644//response to high light intensity;GO:0042542//response to hydrogen peroxide	gi|75288808|sp|Q657C0.1|HFA6B_ORYSJ/0/RecName: Full=Heat stress transcription factor A-6a; AltName: Full=Heat stress transcription factor 1; Short=OsHsf-01
LOC_Os08g13440	675	11	32	36	28	85	685	3.92385	3.50325	up	4.72e-05	0.00145676	-	GO:0005618//cell wall;GO:0048046//apoplast;GO:0016023//cytoplasmic, membrane-bounded vesicle	GO:0045735//nutrient reservoir activity;GO:0030145//manganese ion binding;GO:0046564//oxalate decarboxylase activity	GO:0033609//oxalate metabolic process	gi|75225559|sp|Q6ZCR3.1|GL812_ORYSJ/1.05888e-153/RecName: Full=Germin-like protein 8-12; Flags: Precursor
LOC_Os03g08580	639	2	1	3	18	4	41	0.42471	3.50313	up	0.00019216	0.0046234	-	-	-	-	gi|108706546|gb|ABF94341.1|/1.67421e-159/expressed protein [Oryza sativa Japonica Group]
LOC_Os09g09650	432	7	4	6	108	13	50	1.75142	3.4903	up	7.2e-07	4.24e-05	-	GO:0016021//integral component of membrane;GO:0071013//catalytic step 2 spliceosome	GO:0003676//nucleic acid binding;GO:0008270//zinc ion binding	GO:0000398//mRNA splicing, via spliceosome	gi|49389030|dbj|BAD26273.1|/1.86005e-103/unknown protein [Oryza sativa Japonica Group]
LOC_Os03g56270	3090	5	6	5	82	47	36	1.68392	3.4894	up	3.76e-11	7.51e-09	ko00903//Limonene and pinene degradation;ko00642//Ethylbenzene degradation;ko00362//Benzoate degradation;ko00240//Pyrimidine metabolism;ko00051//Fructose and mannose metabolism;ko01120//Microbial metabolism in diverse environments;ko01100//Metabolic pathways;ko00627//Aminobenzoate degradation;ko00350//Tyrosine metabolism	GO:0016021//integral component of membrane;GO:0005886//plasma membrane	GO:0004672//protein kinase activity;GO:0033612//receptor serine/threonine kinase binding;GO:0043621//protein self-association;GO:0005524//ATP binding	GO:0048437//floral organ development;GO:0006468//protein phosphorylation;GO:0010075//regulation of meristem growth;GO:0048229//gametophyte development	gi|108711313|gb|ABF99108.1|;gi|1002257232|ref|XP_015632935.1|/0;0/Receptor protein kinase CLAVATA1 precursor, putative, expressed [Oryza sativa Japonica Group];PREDICTED: leucine-rich repeat receptor-like serine/threonine-protein kinase BAM1 [Oryza sativa Japonica Group]
LOC_Os08g40270	2220	4	6	9	56	43	94	1.90582	3.48466	up	9.77e-12	2.2e-09	ko00903//Limonene and pinene degradation;ko05142//Chagas disease (American trypanosomiasis);ko05133//Pertussis;ko05145//Toxoplasmosis;ko04626//Plant-pathogen interaction;ko00642//Ethylbenzene degradation;ko00362//Benzoate degradation;ko04075//Plant hormone signal transduction;ko04722//Neurotrophin signaling pathway;ko05162//Measles;ko00240//Pyrimidine metabolism;ko00051//Fructose and mannose meta…	-	GO:0005488;GO:0016301//kinase activity	-	gi|1002290014|ref|XP_015649334.1|/0/PREDICTED: uncharacterized protein LOC4346025 [Oryza sativa Japonica Group]
LOC_Os06g37150	1902	3	126	1	155	432	810	4.7036	3.48255	up	0.00224807	0.0311482	ko01100//Metabolic pathways;ko00053//Ascorbate and aldarate metabolism	-	GO:0016722//oxidoreductase activity, oxidizing metal ions;GO:0005507//copper ion binding	-	gi|1002277823|ref|XP_015643242.1|/0/PREDICTED: L-ascorbate oxidase isoform X2 [Oryza sativa Japonica Group]
LOC_Os01g52530	1230	10	13	16	152	111	129	2.89337	3.47472	up	2.93e-21	4.02e-18	ko00230//Purine metabolism;ko01120//Microbial metabolism in diverse environments;ko01100//Metabolic pathways;ko00030//Pentose phosphate pathway;ko00190//Oxidative phosphorylation;ko01110//Biosynthesis of secondary metabolites;ko00730//Thiamine metabolism	GO:0009507//chloroplast	GO:0005524//ATP binding;GO:0000287//magnesium ion binding;GO:0016301//kinase activity;GO:0004749//ribose phosphate diphosphokinase activity	GO:0009165//nucleotide biosynthetic process;GO:0009116//nucleoside metabolic process;GO:0016310//phosphorylation	gi|68571765|sp|Q8S2E5.1|KPRS3_ORYSJ/0/RecName: Full=Ribose-phosphate pyrophosphokinase 3, chloroplastic; AltName: Full=Phosphoribosyl pyrophosphate synthase 3; Flags: Precursor
LOC_Os06g05410	372	2	0	6	23	16	42	0.739574	3.46502	up	3.88e-06	0.000181337	-	-	-	-	gi|125596047|gb|EAZ35827.1|/6.84573e-12/hypothetical protein OsJ_20120 [Oryza sativa Japonica Group]
LOC_Os01g74020	717	3	1	4	46	6	28	0.733161	3.45456	up	3.22e-05	0.00106431	ko04075//Plant hormone signal transduction	-	-	-	gi|75332124|sp|Q94DH3.1|PCL1_ORYSJ/5.70888e-108/RecName: Full=Transcription factor PCL1; AltName: Full=Protein PHYTOCLOCK 1 homolog; Short=OsPCL1
LOC_Os05g24780	594	2	0	15	98	30	36	1.68734	3.44751	up	7.51e-06	0.000318725	ko04626//Plant-pathogen interaction	GO:0009536//plastid	GO:0005509//calcium ion binding	-	gi|125551781|gb|EAY97490.1|/2.41556e-50/hypothetical protein OsI_19419 [Oryza sativa Indica Group]
LOC_Os01g03290	879	1	1	1	10	12	11	-0.354674	3.44626	up	0.000331852	0.00710223	ko04115//p53 signaling pathway;ko04310//Wnt signaling pathway;ko04120//Ubiquitin mediated proteolysis	GO:0005737//cytoplasm;GO:0005634//nucleus	GO:0016874//ligase activity;GO:0061630//ubiquitin protein ligase activity;GO:0008270//zinc ion binding	GO:0042787//protein ubiquitination involved in ubiquitin-dependent protein catabolic process;GO:0043161//proteasome-mediated ubiquitin-dependent protein catabolic process;GO:0007275//multicellular organism development;GO:0006915//apoptotic process	gi|937894172|dbj|BAS70152.1|/0/Os01g0123700 [Oryza sativa Japonica Group]
LOC_Os01g52240	798	40	80	34	659	489	390	4.84372	3.44618	up	5.27e-20	5.61e-17	ko00196//Photosynthesis - antenna proteins;ko01100//Metabolic pathways	GO:0016021//integral component of membrane;GO:0009522//photosystem I;GO:0009941//chloroplast envelope;GO:0009535//chloroplast thylakoid membrane;GO:0009523//photosystem II;GO:0010287//plastoglobule	GO:0016168//chlorophyll binding;GO:0046872//metal ion binding;GO:0031409//pigment binding	GO:0009416//response to light stimulus;GO:0018298//protein-chromophore linkage;GO:0009768//photosynthesis, light harvesting in photosystem I	gi|113533621|dbj|BAF06004.1|/3.15121e-169/Os01g0720500 [Oryza sativa Japonica Group]
LOC_Os01g65460	2760	3	1	0	23	6	13	-0.0693793	3.44203	up	0.000717602	0.0132442	ko00531//Glycosaminoglycan degradation;ko00052//Galactose metabolism;ko00400//Phenylalanine, tyrosine and tryptophan biosynthesis;ko00051//Fructose and mannose metabolism;ko04142//Lysosome;ko00520//Amino sugar and nucleotide sugar metabolism;ko00604//Glycosphingolipid biosynthesis - ganglio series;ko01100//Metabolic pathways;ko00600//Sphingolipid metabolism;ko03010//Ribosome;ko01110//Biosynthesis…	GO:0009505//plant-type cell wall;GO:0005773//vacuole;GO:0016023//cytoplasmic, membrane-bounded vesicle	GO:0030246//carbohydrate binding;GO:0004565//beta-galactosidase activity	GO:0005975//carbohydrate metabolic process	gi|937899517|dbj|BAS75497.1|/0/Os01g0875500 [Oryza sativa Japonica Group]
LOC_Os03g60380	1005	0	2	5	32	18	21	0.569067	3.43655	up	3.14e-06	0.000151102	ko00940//Phenylpropanoid biosynthesis;ko01100//Metabolic pathways;ko01110//Biosynthesis of secondary metabolites	GO:0005829//cytosol	GO:0050662//coenzyme binding;GO:0003824//catalytic activity	-	gi|125588404|gb|EAZ29068.1|/0/hypothetical protein OsJ_13122 [Oryza sativa Japonica Group]
LOC_Os01g55240	984	1	0	2	5	12	15	-0.38725	3.41429	up	0.00131163	0.0211894	ko00904//Diterpenoid biosynthesis	-	GO:0005506//iron ion binding;GO:0052634//C-19 gibberellin 2-beta-dioxygenase activity	GO:0045487//gibberellin catabolic process;GO:0009416//response to light stimulus;GO:0055114//oxidation-reduction process	gi|20161223|dbj|BAB90150.1|/0
LOC_Os05g33960	1815	1	1	3	34	4	12	0.144285	3.41276	up	0.000986556	0.0169063	-	GO:0016021//integral component of membrane	GO:0005215//transporter activity	GO:0006810//transport	gi|1002267576|ref|XP_015638108.1|/0/PREDICTED: protein NRT1/ PTR FAMILY 3.1 [Oryza sativa Japonica Group]
LOC_Os03g09910	1323	1	3	5	14	23	52	0.863116	3.4127	up	2.71e-06	0.00013233	ko00230//Purine metabolism;ko01100//Metabolic pathways;ko00300//Lysine biosynthesis;ko01110//Biosynthesis of secondary metabolites	-	GO:0010285//L,L-diaminopimelate aminotransferase activity;GO:0030170//pyridoxal phosphate binding	GO:0009862//systemic acquired resistance, salicylic acid mediated signaling pathway;GO:0042742//defense response to bacterium;GO:0009089//lysine biosynthetic process via diaminopimelate;GO:0010150//leaf senescence	gi|75129647|sp|Q6VMN7.1|ALD1_ORYSJ/0/RecName: Full=Aminotransferase ALD1 homolog
LOC_Os09g27700	1788	8	6	10	77	87	69	2.15848	3.41034	up	2.65e-17	1.88e-14	-	-	GO:0008017//microtubule binding	GO:0000226//microtubule cytoskeleton organization;GO:0000910//cytokinesis	gi|51535888|dbj|BAD37971.1|/0/putative microtubule-associated protein MAP65-1a [Oryza sativa Japonica Group]
LOC_Os04g41680	867	15	4	12	74	118	106	2.49994	3.40629	up	2.31e-16	1.39e-13	ko00500//Starch and sucrose metabolism;ko00520//Amino sugar and nucleotide sugar metabolism;ko01100//Metabolic pathways;ko01110//Biosynthesis of secondary metabolites	GO:0016023//cytoplasmic, membrane-bounded vesicle	GO:0004568//chitinase activity;GO:0008061//chitin binding	GO:0006032//chitin catabolic process;GO:0006952//defense response;GO:0051707//response to other organism;GO:0000272//polysaccharide catabolic process;GO:0016998//cell wall macromolecule catabolic process	gi|75296762|sp|Q7Y1Z0.1|CHI5_ORYSJ/2.22843e-179/RecName: Full=Chitinase 5; AltName: Full=Class IV chitinase a; Short=OsChia4a; AltName: Full=Pathogenesis related (PR)-3 chitinase 5; Flags: Precursor
LOC_Os08g18740	5022	0	0	3.65	16.82	14.8	6.13	-0.202123	3.40109	up	0.000780236	0.0141818	-	-	GO:0003676//nucleic acid binding;GO:0004190//aspartic-type endopeptidase activity;GO:0008270//zinc ion binding	GO:0006508//proteolysis	gi|62734122|gb|AAX96231.1|/0/hypothetical protein LOC_Os11g17280 [Oryza sativa Japonica Group]
LOC_Os12g35330	312	1	4	1	12	20	29	0.377034	3.39949	up	3.45e-05	0.00111967	ko00230//Purine metabolism;ko00240//Pyrimidine metabolism;ko01100//Metabolic pathways	GO:0005634//nucleus;GO:0016023//cytoplasmic, membrane-bounded vesicle	GO:0009055//electron carrier activity;GO:0015035//protein disulfide oxidoreductase activity	GO:0045454//cell redox homeostasis;GO:0055114//oxidation-reduction process	gi|77556540|gb|ABA99336.1|/8.26478e-70/Glutaredoxin-like family protein [Oryza sativa Japonica Group]
LOC_Os06g46740	840	58	25	104	882	287	527	5.00741	3.38018	up	2.59e-12	6.63e-10	-	GO:0016021//integral component of membrane;GO:0016023//cytoplasmic, membrane-bounded vesicle;GO:0046658//anchored component of plasma membrane	GO:0009055//electron carrier activity	-	gi|113596416|dbj|BAF20290.1|/5.37549e-79/Os06g0681200 [Oryza sativa Japonica Group]
LOC_Os05g36010	2286	3	4	3	27	45	26	0.977856	3.37899	up	5.32e-09	6.14e-07	-	GO:0005618//cell wall;GO:0016023//cytoplasmic, membrane-bounded vesicle	GO:0004252//serine-type endopeptidase activity	GO:0006508//proteolysis	gi|113579197|dbj|BAF17560.1|/0/Os05g0435800 [Oryza sativa Japonica Group]
LOC_Os08g39860	1500	1	10	1	19	51	49	1.23927	3.37369	up	2.32e-06	0.000115821	ko00500//Starch and sucrose metabolism;ko02030//Bacterial chemotaxis;ko00940//Phenylpropanoid biosynthesis;ko00460//Cyanoamino acid metabolism;ko01100//Metabolic pathways;ko02020//Two-component system;ko01110//Biosynthesis of secondary metabolites	GO:0016023//cytoplasmic, membrane-bounded vesicle;GO:0005739//mitochondrion	GO:0102483//scopolin beta-glucosidase activity;GO:0008422//beta-glucosidase activity	GO:0005975//carbohydrate metabolic process;GO:1901657//glycosyl compound metabolic process	gi|75149042|sp|Q84YK7.1|BGL27_ORYSJ;gi|937931266|dbj|BAT06182.1|/0;0/RecName: Full=Beta-glucosidase 27; Short=Os8bglu27; Flags: Precursor;Os08g0509200 [Oryza sativa Japonica Group]
LOC_Os09g10170	4524	3	0	0	12.38	5	13	-0.431365	3.35793	up	0.00248529	0.0334442	ko03440//Homologous recombination;ko00240//Pyrimidine metabolism;ko01100//Metabolic pathways;ko03460//Fanconi anemia pathway;ko02020//Two-component system;ko02010//ABC transporters;ko00670//One carbon pool by folate	-	GO:0003676//nucleic acid binding	GO:0015074//DNA integration	gi|55168131|gb|AAV43998.1|/0/hypothetical protein [Oryza sativa Japonica Group]
LOC_Os03g46070	690	58	35	35	399	476	311	4.46804	3.35542	up	3.98e-28	1.27e-24	-	GO:0016023//cytoplasmic, membrane-bounded vesicle	-	-	gi|1002257185|ref|XP_015632910.1|/9.60738e-150/PREDICTED: alpha-amylase/trypsin inhibitor [Oryza sativa Japonica Group]
LOC_Os01g06740	849	62	11	95	556	286	649	4.8219	3.35536	up	2.98e-10	4.88e-08	-	-	GO:0030598//rRNA N-glycosylase activity	GO:0006952//defense response;GO:0017148//negative regulation of translation	gi|19071830|dbj|BAB85659.1|/1.41184e-154/ribosome inactivating protein 2 [Oryza sativa]
LOC_Os10g38080	2280	9	3	9	75	66	54	1.91932	3.35235	up	4.91e-14	1.74e-11	-	GO:0005618//cell wall;GO:0016023//cytoplasmic, membrane-bounded vesicle	GO:0004252//serine-type endopeptidase activity	GO:0006508//proteolysis	gi|31433153|gb|AAP54706.1|/0/Subtilisin N-terminal Re
LOC_Os08g36680	816	3	0	8	13	42	48	1.04863	3.35049	up	4.59e-06	0.000210773	ko00910//Nitrogen metabolism	-	GO:0008270//zinc ion binding;GO:0004089//carbonate dehydratase activity	GO:0006730//one-carbon metabolic process	gi|1002289320|ref|XP_015648960.1|/0/PREDICTED: alpha carbonic anhydrase 5 [Oryza sativa Japonica Group]
LOC_Os09g10620	558	1	0	3	3	11	25	-0.154731	3.34179	up	0.00293729	0.0376507	-	-	-	-	gi|255678735|dbj|BAF24667.2|/1.59528e-06/Os09g0278000 [Oryza sativa Japonica Group]
LOC_Os07g34080	3009	0	0	2.99	11.28	4.93	13.59	-0.451329	3.34176	up	0.00251147	0.033634	-	GO:0005739//mitochondrion	-	-	gi|38346732|emb|CAE04297.2|/0/OSJNBa0083I11.7 [Oryza sativa Japonica Group]
LOC_Os11g17504	801	5	4	2	14	38	52	1.06661	3.34069	up	3.85e-07	2.51e-05	ko00623//Toluene degradation;ko00361//Chlorocyclohexane and chlorobenzene degradation;ko00364//Fluorobenzoate degradation;ko01120//Microbial metabolism in diverse environments;ko01100//Metabolic pathways;ko00100//Steroid biosynthesis;ko01110//Biosynthesis of secondary metabolites	GO:0016023//cytoplasmic, membrane-bounded vesicle	GO:0016787//hydrolase activity	-	gi|113644904|dbj|BAF28045.1|;gi|1002304272|ref|XP_015615499.1|/2.09635e-68;2.82386e-180/Os11g0275200 [Oryza sativa Japonica Group];PREDICTED: endo-1,3;1,4-beta-D-glucanase [Oryza sativa Japonica Group]
LOC_Os10g26940	1035	1	8	17	64	125	53	2.20363	3.3353	up	1.26e-09	1.82e-07	-	-	-	-	gi|75141703|sp|Q7XES5.1|BURPG_ORYSJ/0/RecName: Full=BURP domain-containing protein 16; Short=OsBURP16; AltName: Full=Protein WGP1; Short=OsWGP1; Flags: Precursor
LOC_Os01g03340	756	101	340	89	1100	1474	2362	6.5341	3.32747	up	6.3e-11	1.21e-08	-	GO:0005576//extracellular region;GO:0016023//cytoplasmic, membrane-bounded vesicle	GO:0004867//serine-type endopeptidase inhibitor activity	GO:0010951//negative regulation of endopeptidase activity	gi|145944486|gb|ABP98945.1|/0/Bowman-Birk type proteinase inhibitor A [Oryza sativa Japonica Group]
LOC_Os04g32810	642	6	1	5	13	22	74	1.14245	3.32742	up	1.32e-05	0.000511877	-	GO:0005737//cytoplasm	GO:0046914//transition metal ion binding	GO:0046916//cellular transition metal ion homeostasis;GO:0030001//metal ion transport	gi|38605807|emb|CAE05278.3|/1.84047e-95/OSJNBb0014D23.12 [Oryza sativa Japonica Group]
LOC_Os07g28200	4902	1.64	1	1	7.3	11.5	17.13	-0.248794	3.32435	up	0.000296746	0.00653319	ko03440//Homologous recombination;ko00240//Pyrimidine metabolism;ko01100//Metabolic pathways;ko02020//Two-component system;ko02010//ABC transporters;ko00670//One carbon pool by folate	-	GO:0003964//RNA-directed DNA polymerase activity;GO:0003677//DNA binding;GO:0003723//RNA binding;GO:0004190//aspartic-type endopeptidase activity;GO:0008270//zinc ion binding	GO:0006278//RNA-dependent DNA biosynthetic process;GO:0006508//proteolysis;GO:0015074//DNA integration;GO:0006310//DNA recombination	gi|19225021|gb|AAL86497.1|AC099040_1/0/putative polyprotein [Oryza sativa Japonica Group]
LOC_Os02g57400	1488	4	3	6	34	26	58	1.24824	3.31409	up	1.05e-08	1.11e-06	-	-	-	GO:0010264//myo-inositol hexakisphosphate biosynthetic process	gi|170799872|gb|ACB38660.1|;gi|170799866|gb|ACB38657.1|/0;0/mutant low phytic acid protein 1 [Oryza sativa Japonica Group];mutant low phytic acid protein 1 [Oryza sativa Japonica Group]
LOC_Os06g35700	1587	3	1	12	8	44	89	1.48344	3.2937	up	7.92e-05	0.002228	-	GO:0016023//cytoplasmic, membrane-bounded vesicle	GO:0016614//oxidoreductase activity, acting on CH-OH group of donors;GO:0050660//flavin adenine dinucleotide binding	GO:0055114//oxidation-reduction process;GO:0050794//regulation of cellular process	gi|113595873|dbj|BAF19747.1|/0/Os06g0549900 [Oryza sativa Japonica Group]
LOC_Os08g26710	1524	7	7	6	50	57	72	1.81	3.2894	up	2.89e-13	9.09e-11	-	GO:0016021//integral component of membrane	-	-	gi|937930156|dbj|BAT05072.1|/0/Os08g0355400 [Oryza sativa Japonica Group]
LOC_Os04g16430	5469	4.26	0	0	16.81	4.74	17.99	-0.126979	3.28881	up	0.00238347	0.0324613	ko03440//Homologous recombination;ko00240//Pyrimidine metabolism;ko01100//Metabolic pathways;ko03460//Fanconi anemia pathway;ko02020//Two-component system;ko02010//ABC transporters;ko00670//One carbon pool by folate	-	GO:0003964//RNA-directed DNA polymerase activity;GO:0003677//DNA binding;GO:0003723//RNA binding;GO:0004190//aspartic-type endopeptidase activity;GO:0008270//zinc ion binding	GO:0006278//RNA-dependent DNA biosynthetic process;GO:0006508//proteolysis;GO:0015074//DNA integration;GO:0006310//DNA recombination	gi|32489461|emb|CAE05815.1|/0/OSJNBa0028M15.7 [Oryza sativa Japonica Group]
LOC_Os03g21040	1047	18	18	29	317	111	137	3.43821	3.28722	up	1.67e-13	5.47e-11	-	-	-	-	gi|1296955|emb|CAA64683.1|;gi|108707932|gb|ABF95727.1|/0;2.88001e-177/osr40c1 [Oryza sativa Indica Group];expressed protein [Oryza sativa Japonica Group]
LOC_Os07g41200	2823	2	1	1	14	10	14	-0.179592	3.28708	up	0.000330621	0.00708529	-	-	-	GO:0051513//regulation of monopolar cell growth	gi|113611748|dbj|BAF22126.1|/0/Os07g0603300 [Oryza sativa Japonica Group]
LOC_Os04g58200	1164	6	14	8	44	120	90	2.28096	3.28684	up	1.41e-11	3.1e-09	ko00860//Porphyrin and chlorophyll metabolism;ko01100//Metabolic pathways;ko01110//Biosynthesis of secondary metabolites	GO:0009507//chloroplast	GO:0016630//protochlorophyllide reductase activity	GO:0015995//chlorophyll biosynthetic process;GO:0015979//photosynthesis;GO:0055114//oxidation-reduction process	gi|75232717|sp|Q7XKF3.1|PORA_ORYSJ/0/RecName: Full=Protochlorophyllide reductase A, chloroplastic; Short=PCR A; AltName: Full=NADPH-protochlorophyllide oxidoreductase A; Short=POR A; Flags: Precursor
LOC_Os09g08130	1158	7	23	2	56	130	108	2.48907	3.28294	up	1.43e-08	1.47e-06	ko00400//Phenylalanine, tyrosine and tryptophan biosynthesis;ko01100//Metabolic pathways;ko01110//Biosynthesis of secondary metabolites	GO:0009536//plastid	GO:0004640//phosphoribosylanthranilate isomerase activity;GO:0004425//indole-3-glycerol-phosphate synthase activity	GO:0000162//tryptophan biosynthetic process	gi|113630926|dbj|BAF24607.1|;gi|937932163|dbj|BAT07078.1|/0;0/Os09g0255400 [Oryza sativa Japonica Group];Os09g0255400 [Oryza sativa Japonica Group]
LOC_Os12g03050	1191	20	8	33	239	104	171	3.3053	3.25675	up	3.22e-13	9.95e-11	-	GO:0005634//nucleus	GO:0003677//DNA binding	GO:0006355//regulation of transcription, DNA-templated	gi|84029362|sp|Q5CD17.2|NAC77_ORYSJ/0/RecName: Full=NAC domain-containing protein 77; Short=ONAC077; AltName: Full=NAC domain-containing protein 300; Short=ONAC300
LOC_Os04g59190	1023	6	2	3	16	14	65	0.971218	3.24781	up	2.38e-05	0.00082763	ko00940//Phenylpropanoid biosynthesis;ko00360//Phenylalanine metabolism;ko01100//Metabolic pathways;ko01110//Biosynthesis of secondary metabolites	GO:0009505//plant-type cell wall;GO:0005576//extracellular region;GO:0016023//cytoplasmic, membrane-bounded vesicle	GO:0046872//metal ion binding;GO:0020037//heme binding;GO:0004601//peroxidase activity	GO:0098869//cellular oxidant detoxification;GO:0006979//response to oxidative stress;GO:0042744//hydrogen peroxide catabolic process;GO:0009664//plant-type cell wall organization;GO:0055114//oxidation-reduction process	gi|5777627|emb|CAB53488.1|/0/CAA303715.1 protein [Oryza sativa]
LOC_Os01g64670	639	0	2	3	26	8	11	0.0263995	3.23959	up	0.000765844	0.0139865	ko00190//Oxidative phosphorylation	GO:0016020//membrane;GO:0005737//cytoplasm	GO:0004427//inorganic diphosphatase activity;GO:0000287//magnesium ion binding	GO:0006796//phosphate-containing compound metabolic process	gi|113534438|dbj|BAF06821.1|/1.66488e-157/Os01g0866500 [Oryza sativa Japonica Group]
LOC_Os01g06730	3081	9	2	11	47	34	104	1.87182	3.23876	up	2.31e-08	2.28e-06	ko04626//Plant-pathogen interaction	GO:0016021//integral component of membrane;GO:0016023//cytoplasmic, membrane-bounded vesicle	-	-	gi|1002227256|ref|XP_015630998.1|/0/PREDICTED: receptor-like protein 12 [Oryza sativa Japonica Group]
LOC_Os01g21960	1551	0	3	1	16	9	12	-0.204157	3.23226	up	0.000828126	0.0148551	ko05142//Chagas disease (American trypanosomiasis);ko05133//Pertussis;ko05145//Toxoplasmosis;ko04626//Plant-pathogen interaction;ko04722//Neurotrophin signaling pathway;ko05162//Measles;ko04620//Toll-like receptor signaling pathway;ko05164//Influenza A;ko05140//Leishmaniasis;ko05152//Tuberculosis;ko04064//NF-kappa B signaling pathway;ko04210//Apoptosis	GO:0016021//integral component of membrane;GO:0009536//plastid	GO:0004713//protein tyrosine kinase activity;GO:0005524//ATP binding;GO:0004674//protein serine/threonine kinase activity	GO:0006468//protein phosphorylation	gi|12328581|dbj|BAB21240.1|/0/receptor protein kinase PERK1-like protein [Oryza sativa Japonica Group]
LOC_Os10g36880	3180	4	0	3	17	19	25	0.391154	3.22264	up	1.51e-05	0.000570434	-	GO:0005871//kinesin complex	GO:0008017//microtubule binding;GO:0016887//ATPase activity;GO:0005524//ATP binding;GO:0008270//zinc ion binding;GO:0003777//microtubule motor activity	GO:0007018//microtubule-based movement	gi|937936722|dbj|BAT11636.1|/0/Os10g0512800 [Oryza sativa Japonica Group]
LOC_Os07g09190	2142	14	40	4	64	224	218	3.26184	3.20779	up	3.78e-07	2.49e-05	ko00900//Terpenoid backbone biosynthesis;ko01100//Metabolic pathways;ko02010//ABC transporters;ko01110//Biosynthesis of secondary metabolites	GO:0009507//chloroplast	GO:0046872//metal ion binding;GO:0008661//1-deoxy-D-xylulose-5-phosphate synthase activity	GO:0016114//terpenoid biosynthetic process;GO:0009228//thiamine biosynthetic process;GO:0052865//1-deoxy-D-xylulose 5-phosphate biosynthetic process	gi|75225072|sp|Q6YU51.1|DXS2_ORYSJ/0/RecName: Full=Probable 1-deoxy-D-xylulose-5-phosphate synthase 2, chloroplastic; Short=1-deoxyxylulose-5-phosphate synthase; Short=DXP synthase; Short=DXPS; Flags: Precursor
LOC_Os02g14440	966	5	2	2	20	4	51	0.673945	3.19452	up	0.000347905	0.00735548	ko00940//Phenylpropanoid biosynthesis;ko00360//Phenylalanine metabolism;ko01100//Metabolic pathways;ko01110//Biosynthesis of secondary metabolites	GO:0005576//extracellular region;GO:0016023//cytoplasmic, membrane-bounded vesicle	GO:0046872//metal ion binding;GO:0020037//heme binding;GO:0004601//peroxidase activity	GO:0098869//cellular oxidant detoxification;GO:0006979//response to oxidative stress;GO:0042744//hydrogen peroxide catabolic process;GO:0055114//oxidation-reduction process	gi|55700925|tpe|CAH69271.1|/0/TPA: class III peroxidase 29 precursor [Oryza sativa Japonica Group]
LOC_Os05g49730	1146	6	2	13	69	33	69	1.76673	3.18905	up	5.14e-09	5.97e-07	ko04075//Plant hormone signal transduction	-	GO:0004721//phosphoprotein phosphatase activity;GO:0043169//cation binding	-	gi|75288846|sp|Q65XK7.1|P2C51_ORYSJ/0/RecName: Full=Probable protein phosphatase 2C 51; Short=OsPP2C51
LOC_Os09g31970	1731	10	9	21	125	47	151	2.66011	3.18759	up	2.8e-10	4.68e-08	ko00900//Terpenoid backbone biosynthesis;ko04976//Bile secretion;ko01100//Metabolic pathways;ko01110//Biosynthesis of secondary metabolites	GO:0016021//integral component of membrane;GO:0005739//mitochondrion;GO:0005778//peroxisomal membrane;GO:0005789//endoplasmic reticulum membrane	GO:0004420//hydroxymethylglutaryl-CoA reductase (NADPH) activity;GO:0050661//NADP binding	GO:0015936//coenzyme A metabolic process;GO:0055114//oxidation-reduction process;GO:0008299//isoprenoid biosynthetic process;GO:0016126//sterol biosynthetic process	gi|113631774|dbj|BAF25455.1|/0/Os09g0492700 [Oryza sativa Japonica Group]
LOC_Os04g58960	3174	1	0	5	21	14	16	0.17601	3.18402	up	0.000115499	0.00301334	ko04120//Ubiquitin mediated proteolysis	-	GO:0046872//metal ion binding	-	gi|38345822|emb|CAD41927.2|/0/OSJNBa0070M12.5 [Oryza sativa Japonica Group]
LOC_Os10g37940	4758	2	1	0	11	3	13	-0.542556	3.18248	up	0.00420288	0.0490233	ko03013//RNA transport;ko03015//mRNA surveillance pathway;ko03008//Ribosome biogenesis in eukaryotes;ko03018//RNA degradation	GO:0005739//mitochondrion	-	-	gi|110289448|gb|AAP54692.2|/0/retrotransposon protein, putative, unclassified [Oryza sativa Japonica Group]
LOC_Os03g63790	6084	3.14	1.66	0.8	24.32	9.12	14.34	0.103334	3.17227	up	0.000193559	0.00465125	ko03440//Homologous recombination;ko00240//Pyrimidine metabolism;ko01100//Metabolic pathways;ko03460//Fanconi anemia pathway;ko02020//Two-component system;ko02010//ABC transporters;ko00670//One carbon pool by folate	GO:0009536//plastid	GO:0004523//RNA-DNA hybrid ribonuclease activity;GO:0003676//nucleic acid binding	GO:0090502//RNA phosphodiester bond hydrolysis, endonucleolytic;GO:0015074//DNA integration	gi|29126347|gb|AAO66539.1|/0/retrotransposon protein, putative, unclassified [Oryza sativa Japonica Group]
LOC_Os12g16720	1572	51	38	115	793	420	398	4.94277	3.16195	up	1.05e-14	4.19e-12	ko00624//Polycyclic aromatic hydrocarbon degradation;ko00903//Limonene and pinene degradation;ko00966//Glucosinolate biosynthesis;ko01120//Microbial metabolism in diverse environments;ko01100//Metabolic pathways;ko00627//Aminobenzoate degradation;ko00380//Tryptophan metabolism;ko00945//Stilbenoid, diarylheptanoid and gingerol biosynthesis;ko00363//Bisphenol degradation;ko01110//Biosynthesis of se…	GO:0016021//integral component of membrane	GO:0016709//oxidoreductase activity, acting on paired donors, with incorporation or reduction of molecular oxygen, NAD(P)H as one donor, and incorporation of one atom of oxygen;GO:0020037//heme binding;GO:0005506//iron ion binding	GO:0044550//secondary metabolite biosynthetic process;GO:0055114//oxidation-reduction process	gi|77554241|gb|ABA97037.1|/0/Cytochrome P450 family protein, expressed [Oryza sativa Japonica Group]
LOC_Os01g73930	3249	2.08	0	2.25	18.13	7.05	11.53	-0.205229	3.15384	up	0.000996215	0.0170262	-	GO:0016020//membrane;GO:0005739//mitochondrion	GO:0003676//nucleic acid binding;GO:0008270//zinc ion binding	-	gi|38605784|emb|CAE05885.3|/0/OSJNBa0044K18.27 [Oryza sativa Japonica Group]
LOC_Os04g32800	648	4	3	0	5	18	36	0.357563	3.15013	up	0.00104505	0.0176875	-	GO:0005737//cytoplasm	GO:0046914//transition metal ion binding	GO:0046916//cellular transition metal ion homeostasis;GO:0030001//metal ion transport	gi|937914114|dbj|BAS89033.1|/5.07028e-71/Os04g0400000 [Oryza sativa Japonica Group]
LOC_Os01g54620	2970	1	7	4	39	10	49	1.02561	3.14942	up	3.25e-05	0.001068	-	GO:0005618//cell wall;GO:0016021//integral component of membrane;GO:0005886//plasma membrane	GO:0046872//metal ion binding;GO:0016760//cellulose synthase (UDP-forming) activity	GO:0009414//response to water deprivation;GO:0030244//cellulose biosynthetic process;GO:0042742//defense response to bacterium;GO:0071555//cell wall organization;GO:0006970//response to osmotic stress;GO:0050832//defense response to fungus;GO:0009834//plant-type secondary cell wall biogenesis	gi|75106446|sp|Q5JN63.1|CESA4_ORYSJ/0/RecName: Full=Cellulose synthase A catalytic subunit 4 [UDP-forming]; AltName: Full=OsCesA4
LOC_Os01g72360	657	1	6	4	60	12	18	0.910551	3.14736	up	8.91e-05	0.00244028	-	-	-	-	gi|113534954|dbj|BAF07337.1|/1.21477e-115/Os01g0952900 [Oryza sativa Japonica Group]
LOC_Os05g03610	1797	3	10	4	6	77	60	1.49709	3.14599	up	4.61e-05	0.00142867	ko04020//Calcium signaling pathway;ko00562//Inositol phosphate metabolism;ko01100//Metabolic pathways;ko04070//Phosphatidylinositol signaling system	GO:0005622//intracellular	GO:0004871//signal transducer activity;GO:0004435//phosphatidylinositol phospholipase C activity	GO:0035556//intracellular signal transduction;GO:0016042//lipid catabolic process	gi|113578082|dbj|BAF16445.1|/0/Os05g0127200 [Oryza sativa Japonica Group]
LOC_Os08g34860	2139	3	1	0	13	4	17	-0.287385	3.1423	up	0.00324175	0.0405768	-	-	-	-	gi|42407609|dbj|BAD08724.1|/0/F-box protein family-like [Oryza sativa Japonica Group]
LOC_Os08g38910	879	15	43	8	210	158	171	3.37547	3.14208	up	2.7e-11	5.56e-09	ko00941//Flavonoid biosynthesis;ko00940//Phenylpropanoid biosynthesis;ko00360//Phenylalanine metabolism;ko01100//Metabolic pathways;ko00945//Stilbenoid, diarylheptanoid and gingerol biosynthesis;ko01110//Biosynthesis of secondary metabolites	GO:0005739//mitochondrion	GO:0008757//S-adenosylmethionine-dependent methyltransferase activity;GO:0046872//metal ion binding;GO:0008171//O-methyltransferase activity	GO:0032259//methylation	gi|75326706|sp|Q7F8T6.1|OMT17_ORYSJ;gi|937931169|dbj|BAT06085.1|/0;3.02829e-128/RecName: Full=Tricin synthase 2; AltName: Full=Caffeoyl-CoA 3-O-methyltransferase ROMT17;Os08g0498400 [Oryza sativa Japonica Group]
LOC_Os03g36279	882	9	1	18	131	16	67	2.09482	3.13567	up	3.72e-05	0.0011938	-	-	-	-	gi|108709311|gb|ABF97106.1|/0/retrotransposon protein, putative, Ty3-gypsy subclass, expressed [Oryza sativa Japonica Group]
LOC_Os10g23310	1311	16	5	13	43	77	146	2.37831	3.12653	up	1.65e-09	2.26e-07	ko00941//Flavonoid biosynthesis;ko00940//Phenylpropanoid biosynthesis;ko00945//Stilbenoid, diarylheptanoid and gingerol biosynthesis;ko01110//Biosynthesis of secondary metabolites	-	GO:0016747//transferase activity, transferring acyl groups other than amino-acyl groups	-	gi|78708430|gb|ABB47405.1|/0/Transferase family protein, expressed [Oryza sativa Japonica Group]
LOC_Os05g45930	1725	5	3	2	30	23	28	0.763923	3.12586	up	2.18e-07	1.59e-05	-	-	-	-	gi|113579711|dbj|BAF18074.1|/0/Os05g0535900 [Oryza sativa Japonica Group]
LOC_Os06g47120	1710	1	1	2	14	3	16	-0.316727	3.10647	up	0.00334413	0.0416139	-	-	-	-	gi|937924271|dbj|BAS99188.1|/0/Os06g0685200 [Oryza sativa Japonica Group]
LOC_Os03g08550	2157	8	3	7	82	23	34	1.49413	3.10456	up	5.58e-07	3.42e-05	ko04626//Plant-pathogen interaction	GO:0016021//integral component of membrane;GO:0016023//cytoplasmic, membrane-bounded vesicle	GO:0004672//protein kinase activity;GO:0005524//ATP binding	GO:0006468//protein phosphorylation	gi|1002848586|ref|XP_006649512.2|/0/PREDICTED: protein STRUBBELIG-RECEPTOR FAMILY 7-like [Oryza brachyantha]
LOC_Os04g04060	2082	7	2	2	14	27	46	0.857444	3.10036	up	7.09e-06	0.000303566	ko05100//Bacterial invasion of epithelial cells;ko04961//Endocrine and other factor-regulated calcium reabsorption;ko04721//Synaptic vesicle cycle;ko04666//Fc gamma R-mediated phagocytosis;ko04144//Endocytosis	-	GO:0003924//GTPase activity;GO:0005525//GTP binding	-	gi|38344415|emb|CAE02378.2|/0/OSJNBb0080H08.3 [Oryza sativa Japonica Group]
LOC_Os01g42860	219	18	1	8	82	39	84	2.02723	3.09867	up	1.04e-07	8.21e-06	-	-	GO:0008233//peptidase activity;GO:0004867//serine-type endopeptidase inhibitor activity	GO:0010951//negative regulation of endopeptidase activity;GO:0009611//response to wounding	gi|54290294|dbj|BAD61239.1|/3.18068e-44/protease inhibitor-like [Oryza sativa Japonica Group]
LOC_Os03g33520	1671	2	5	3	31	11	37	0.745	3.09594	up	1.18e-05	0.000467382	ko04910//Insulin signaling pathway	GO:0009536//plastid	-	-	gi|108709147|gb|ABF96942.1|/0/Exo70 exocyst complex subunit family protein [Oryza sativa Japonica Group]
LOC_Os09g36350	1587	2	6	5	47	28	27	1.07161	3.08634	up	8.2e-08	6.58e-06	ko00500//Starch and sucrose metabolism;ko00520//Amino sugar and nucleotide sugar metabolism;ko01100//Metabolic pathways;ko01110//Biosynthesis of secondary metabolites	GO:0016021//integral component of membrane;GO:0005576//extracellular region;GO:0016023//cytoplasmic, membrane-bounded vesicle	GO:0008810//cellulase activity	GO:0071555//cell wall organization;GO:0030245//cellulose catabolic process	gi|75118825|sp|Q69SG5.1|GUN24_ORYSJ/0/RecName: Full=Endoglucanase 24; AltName: Full=Endo-1,4-beta glucanase 24; Flags: Precursor
LOC_Os10g38120	1599	1	1	3	16	20	5	-0.085445	3.08297	up	0.00119598	0.0196526	ko00073//Cutin, suberine and wax biosynthesis;ko01100//Metabolic pathways	GO:0016021//integral component of membrane;GO:0016023//cytoplasmic, membrane-bounded vesicle	GO:0004497//monooxygenase activity;GO:0005506//iron ion binding;GO:0020037//heme binding;GO:0016705//oxidoreductase activity, acting on paired donors, with incorporation or reduction of molecular oxygen	GO:0022900//electron transport chain	gi|110289453|gb|AAP54710.2|/0/Cytochrome P450 family protein [Oryza sativa Japonica Group]
LOC_Os05g02820	2670	2	1	2	15	6	19	-0.0972857	3.08075	up	0.000970433	0.0166803	-	GO:0009536//plastid	-	-	gi|1002272577|ref|XP_015640591.1|/0/PREDICTED: WEB family protein At3g02930, chloroplastic-like [Oryza sativa Japonica Group]
LOC_Os08g28710	1464	21	19	48	154	108	385	3.65766	3.06209	up	7.76e-10	1.18e-07	ko00903//Limonene and pinene degradation;ko05142//Chagas disease (American trypanosomiasis);ko05133//Pertussis;ko05145//Toxoplasmosis;ko00642//Ethylbenzene degradation;ko00362//Benzoate degradation;ko04722//Neurotrophin signaling pathway;ko05162//Measles;ko00240//Pyrimidine metabolism;ko00051//Fructose and mannose metabolism;ko04620//Toll-like receptor signaling pathway;ko05164//Influenza A;ko011…	-	GO:0004672//protein kinase activity;GO:0005524//ATP binding	GO:0006468//protein phosphorylation	gi|1002288363|ref|XP_015648480.1|/0/PREDICTED: putative serine/threonine-protein kinase-like protein CCR3 [Oryza sativa Japonica Group]
LOC_Os10g20120	2403	2	2	1	8	11	21	-0.100905	3.05748	up	0.00091502	0.0160053	ko05142//Chagas disease (American trypanosomiasis);ko05133//Pertussis;ko05145//Toxoplasmosis;ko04626//Plant-pathogen interaction;ko04075//Plant hormone signal transduction;ko04722//Neurotrophin signaling pathway;ko05162//Measles;ko04620//Toll-like receptor signaling pathway;ko05164//Influenza A;ko05140//Leishmaniasis;ko05152//Tuberculosis;ko04064//NF-kappa B signaling pathway;ko04210//Apoptosis	GO:0005886//plasma membrane;GO:0016021//integral component of membrane	GO:0030246//carbohydrate binding;GO:0005524//ATP binding;GO:0004674//protein serine/threonine kinase activity	GO:0048544//recognition of pollen;GO:0006468//protein phosphorylation	gi|31431340|gb|AAP53135.1|/0/D-mannose binding lectin family protein, expressed [Oryza sativa Japonica Group]
LOC_Os04g40630	1068	12	20	21	108	184	112	2.95677	3.05611	up	9.36e-17	6.19e-14	ko05211//Renal cell carcinoma;ko00624//Polycyclic aromatic hydrocarbon degradation;ko00903//Limonene and pinene degradation;ko04916//Melanogenesis;ko05166//HTLV-I infection;ko05200//Pathways in cancer;ko05016//Huntington's disease;ko04310//Wnt signaling pathway;ko04330//Notch signaling pathway;ko05169//Epstein-Barr virus infection;ko04110//Cell cycle;ko05164//Influenza A;ko01120//Microbial metabo…	GO:0005634//nucleus	GO:0003712//transcription cofactor activity;GO:0008270//zinc ion binding;GO:0004402//histone acetyltransferase activity	GO:0006355//regulation of transcription, DNA-templated;GO:0016573//histone acetylation	gi|38345257|emb|CAD41101.2|;gi|1002265369|ref|XP_015637018.1|/0;0/OSJNBb0011N17.18 [Oryza sativa Japonica Group];PREDICTED: BTB/POZ and TAZ domain-containing protein 1 isoform X2 [Oryza sativa Japonica Group]
LOC_Os01g05870	3198	6	5	5	41	54	28	1.31143	3.05352	up	2.66e-09	3.33e-07	ko04626//Plant-pathogen interaction	GO:0016021//integral component of membrane;GO:0016023//cytoplasmic, membrane-bounded vesicle	GO:0004674//protein serine/threonine kinase activity;GO:0003677//DNA binding;GO:0005524//ATP binding	GO:0006468//protein phosphorylation;GO:0006306//DNA methylation	gi|113531574|dbj|BAF03957.1|/0/Os01g0152000 [Oryza sativa Japonica Group]
LOC_Os11g37970	441	17	6	22	105	106	122	2.69856	3.04616	up	2.34e-15	1.12e-12	-	GO:0016023//cytoplasmic, membrane-bounded vesicle	-	GO:0050832//defense response to fungus;GO:0042742//defense response to bacterium	gi|125535003|gb|EAY81551.1|/7.8087e-93/hypothetical protein OsI_36717 [Oryza sativa Indica Group]
LOC_Os04g44370	4962	2.8	1.34	1.01	14.46	4.13	21.46	-0.0899271	3.04429	up	0.00190906	0.0277966	ko03013//RNA transport;ko03008//Ribosome biogenesis in eukaryotes;ko03018//RNA degradation	GO:0071013//catalytic step 2 spliceosome	GO:0003964//RNA-directed DNA polymerase activity;GO:0003723//RNA binding	GO:0000398//mRNA splicing, via spliceosome;GO:0006278//RNA-dependent DNA biosynthetic process	gi|116310953|emb|CAH67890.1|/0/OSIGBa0153E02-OSIGBa0093I20.19 [Oryza sativa Indica Group]
LOC_Os09g32510	1125	17	22	31	206	119	187	3.31994	3.03039	up	1.08e-16	6.9e-14	ko04712//Circadian rhythm - plant	GO:0005634//nucleus	GO:0046983//protein dimerization activity	-	gi|125564259|gb|EAZ09639.1|;gi|113631815|dbj|BAF25496.1|/0;0/hypothetical protein OsI_31923 [Oryza sativa Indica Group];Os09g0501600 [Oryza sativa Japonica Group]
LOC_Os06g04900	1563	2	1	6	7	38	24	0.549504	3.02988	up	0.000209128	0.00495091	-	GO:0005887//integral component of plasma membrane	GO:0005355//glucose transmembrane transporter activity;GO:0005351//sugar:proton symporter activity	GO:0046323//glucose import;GO:0035428//hexose transmembrane transport	gi|937921164|dbj|BAS96081.1|/0/Os06g0141100 [Oryza sativa Japonica Group]
LOC_Os01g63190	1680	4	7	5	45	35	40	1.29367	3.02758	up	1.67e-09	2.27e-07	ko01100//Metabolic pathways;ko00053//Ascorbate and aldarate metabolism	GO:0048046//apoplast;GO:0016023//cytoplasmic, membrane-bounded vesicle	GO:0016722//oxidoreductase activity, oxidizing metal ions;GO:0005507//copper ion binding;GO:0052716//hydroquinone:oxygen oxidoreductase activity	GO:0046274//lignin catabolic process;GO:0055114//oxidation-reduction process	gi|75321170|sp|Q5N7B4.1|LAC7_ORYSJ;gi|56784497|dbj|BAD82648.1|/0;0/RecName: Full=Laccase-7; AltName: Full=Benzenediol:oxygen oxidoreductase 7; AltName: Full=Diphenol oxidase 7; AltName: Full=Urishiol oxidase 7; Flags: Precursor;laccase LAC5-4-like protein [Oryza sativa Japonica Group]
LOC_Os04g55840	1647	1	4	2	27	17	10	0.260048	3.01943	up	0.000254537	0.00575179	-	GO:0005634//nucleus	GO:0004843//thiol-dependent ubiquitin-specific protease activity;GO:0019784//NEDD8-specific protease activity;GO:0043130//ubiquitin binding	GO:0071108//protein K48-linked deubiquitination	gi|38345899|emb|CAE03543.2|/0/OSJNBa0060D06.9 [Oryza sativa Japonica Group]
LOC_Os04g05010	663	22	47	12	210	248	151	3.54915	3.01806	up	6.34e-13	1.87e-10	-	GO:0009536//plastid	GO:0003824//catalytic activity	-	gi|38347506|emb|CAE02417.2|/1.32024e-141/OSJNBa0095E20.4 [Oryza sativa Japonica Group]
LOC_Os01g67820	1779	5	0	2	33	8	11	0.222847	3.01596	up	0.0011415	0.0189847	ko04910//Insulin signaling pathway	GO:0000145//exocyst	-	GO:0006887//exocytosis	gi|1002225932|ref|XP_015624439.1|/0/PREDICTED: exocyst complex component EXO70A1 [Oryza sativa Japonica Group]
LOC_Os01g74160	1023	21	24	22	175	274	51	3.25222	3.01379	up	1e-09	1.46e-07	-	GO:0016023//cytoplasmic, membrane-bounded vesicle	-	-	gi|937900461|dbj|BAS76441.1|/0/Os01g0973100 [Oryza sativa Japonica Group]
LOC_Os06g34070	1128	2	1	3	21	9	15	0.0465697	3.00106	up	0.000230343	0.00532176	ko00230//Purine metabolism;ko04142//Lysosome;ko01120//Microbial metabolism in diverse environments;ko01100//Metabolic pathways;ko00030//Pentose phosphate pathway;ko00906//Carotenoid biosynthesis;ko01110//Biosynthesis of secondary metabolites;ko00511//Other glycan degradation;ko00250//Alanine, aspartate and glutamate metabolism	GO:0005739//mitochondrion	GO:0016788//hydrolase activity, acting on ester bonds	-	gi|113595825|dbj|BAF19699.1|/0/Os06g0531600 [Oryza sativa Japonica Group]
LOC_Os01g24790	1368	3	9	2	18	70	19	1.11541	2.98843	up	3.83e-05	0.0012154	ko00073//Cutin, suberine and wax biosynthesis	-	GO:0016747//transferase activity, transferring acyl groups other than amino-acyl groups	-	gi|113532512|dbj|BAF04895.1|/0/Os01g0350000 [Oryza sativa Japonica Group]
LOC_Os08g14000	831	4	0	2	9.62	13	22	0.0330474	2.98743	up	0.00049206	0.00967769	ko00623//Toluene degradation;ko00361//Chlorocyclohexane and chlorobenzene degradation;ko00364//Fluorobenzoate degradation;ko01120//Microbial metabolism in diverse environments;ko01100//Metabolic pathways;ko00100//Steroid biosynthesis;ko01110//Biosynthesis of secondary metabolites	GO:0016023//cytoplasmic, membrane-bounded vesicle	GO:0016787//hydrolase activity	-	gi|113623292|dbj|BAF23237.1|/3.24782e-180/Os08g0238200 [Oryza sativa Japonica Group]
LOC_Os04g57880	1461	13	2	13	133	8	52	1.97046	2.98474	up	0.000224107	0.0052095	-	GO:0016020//membrane;GO:0009536//plastid	-	-	gi|38344928|emb|CAE03244.2|/0/OSJNBa0018M05.19 [Oryza sativa Japonica Group]
LOC_Os07g09420	1551	41	14	100	432	191	434	4.36776	2.97462	up	1.23e-08	1.3e-06	-	GO:0016021//integral component of membrane	GO:0005524//ATP binding	-	gi|50510113|dbj|BAD30881.1|/0/AAA-type ATPase-like [Oryza sativa Japonica Group]
LOC_Os01g62630	1347	3	0	2	14	7	16	-0.179657	2.97441	up	0.000937374	0.0162818	ko00903//Limonene and pinene degradation;ko00642//Ethylbenzene degradation;ko00362//Benzoate degradation;ko00240//Pyrimidine metabolism;ko00051//Fructose and mannose metabolism;ko01120//Microbial metabolism in diverse environments;ko01100//Metabolic pathways;ko00627//Aminobenzoate degradation;ko00350//Tyrosine metabolism	-	GO:0004190//aspartic-type endopeptidase activity	GO:0006508//proteolysis;GO:0030163//protein catabolic process	gi|937899207|dbj|BAS75187.1|/0/Os01g0844500 [Oryza sativa Japonica Group]
LOC_Os10g36180	1341	12	0	9	92	16	36	1.56224	2.96521	up	0.000104251	0.00276122	-	-	-	-	gi|78708883|gb|ABB47858.1|/0/expressed protein [Oryza sativa Japonica Group]
LOC_Os09g36930	873	69	150	41	529	1037	343	5.17327	2.962	up	6.6e-10	1.02e-07	-	GO:0009506//plasmodesma;GO:0005887//integral component of plasma membrane;GO:0005773//vacuole	GO:0015254//glycerol channel activity;GO:0015250//water channel activity	GO:0009992//cellular water homeostasis;GO:0006833//water transport;GO:0015793//glycerol transport;GO:0034220//ion transmembrane transport	gi|82581514|sp|Q651D5.2|PIP27_ORYSJ/0/RecName: Full=Probable aquaporin PIP2-7; AltName: Full=OsPIP2;7; AltName: Full=Plasma membrane intrinsic protein 2-7
LOC_Os01g47080	1752	5	16	5	57	69	61	1.90056	2.95635	up	2.84e-10	4.69e-08	ko00230//Purine metabolism;ko04930//Type II diabetes mellitus;ko00710//Carbon fixation in photosynthetic organisms;ko01120//Microbial metabolism in diverse environments;ko01100//Metabolic pathways;ko00620//Pyruvate metabolism;ko01110//Biosynthesis of secondary metabolites;ko00010//Glycolysis / Gluconeogenesis;ko00730//Thiamine metabolism	GO:0005739//mitochondrion;GO:0009570//chloroplast stroma	GO:0030955//potassium ion binding;GO:0004743//pyruvate kinase activity;GO:0000287//magnesium ion binding;GO:0016301//kinase activity	GO:0006633//fatty acid biosynthetic process;GO:0010431//seed maturation;GO:0006096//glycolytic process	gi|1002236291|ref|XP_015622342.1|/0/PREDICTED: plastidial pyruvate kinase 2 [Oryza sativa Japonica Group]
LOC_Os06g14030	2577	78	46	83	758	234	414	4.78183	2.94829	up	1.17e-12	3.29e-10	ko04626//Plant-pathogen interaction	GO:0005887//integral component of plasma membrane	GO:0005249//voltage-gated potassium channel activity	GO:0034765//regulation of ion transmembrane transport;GO:0071805//potassium ion transmembrane transport;GO:0042391//regulation of membrane potential	gi|75114599|sp|Q653P0.1|KOR1_ORYSJ/0/RecName: Full=Potassium channel KOR1; AltName: Full=K(+) outward-rectifying channel 1
LOC_Os05g37520	1455	14	27	13	179	101	99	2.89975	2.94548	up	2.58e-12	6.63e-10	-	GO:0009536//plastid	-	GO:0006396//RNA processing	gi|1002272553|ref|XP_015640578.1|;gi|113579246|dbj|BAF17609.1|/0;0/PREDICTED: uncharacterized protein LOC4338950 isoform X2 [Oryza sativa Japonica Group];Os05g0447700 [Oryza sativa Japonica Group]
LOC_Os04g53606	522	1	1	5	18	12	20	0.177216	2.94228	up	0.000189499	0.00457087	-	GO:0009536//plastid	GO:0003743//translation initiation factor activity	GO:0006413//translational initiation	gi|215766177|dbj|BAG98405.1|/1.96837e-40/unnamed protein product [Oryza sativa Japonica Group]
LOC_Os05g23924	1740	3	1	2	24	8	11	-0.000285136	2.93682	up	0.000589082	0.0112512	-	-	GO:0004553//hydrolase activity, hydrolyzing O-glycosyl compounds	GO:0005975//carbohydrate metabolic process	gi|1002269688|ref|XP_015639187.1|;gi|113578696|dbj|BAF17059.1|/0;0/PREDICTED: uncharacterized protein LOC4338360 isoform X2 [Oryza sativa Japonica Group];Os05g0304900 [Oryza sativa Japonica Group]
LOC_Os02g43740	2073	2	2	1	15	14	8	-0.18437	2.93574	up	0.00100203	0.0171104	-	GO:0005737//cytoplasm;GO:0005634//nucleus;GO:0005886//plasma membrane	GO:0004674//protein serine/threonine kinase activity;GO:0005524//ATP binding	GO:0006468//protein phosphorylation;GO:0035556//intracellular signal transduction	gi|113537141|dbj|BAF09524.1|/0/Os02g0654300 [Oryza sativa Japonica Group]
LOC_Os12g42760	1464	2	3	3	21	27	10	0.34766	2.93402	up	6.94e-05	0.00199561	ko04113//Meiosis - yeast	GO:0005694//chromosome;GO:0005634//nucleus	GO:0030957//Tat protein binding;GO:0046872//metal ion binding;GO:0003677//DNA binding;GO:0005524//ATP binding;GO:0003918//DNA topoisomerase type II (ATP-hydrolyzing) activity;GO:0042803//protein homodimerization activity	GO:0006302//double-strand break repair;GO:0000737//DNA catabolic process, endonucleolytic;GO:0007131//reciprocal meiotic recombination;GO:0006265//DNA topological change	gi|122248503|sp|Q2QM00.2|SPO14_ORYSJ/0/RecName: Full=Meiotic recombination protein SPO11-4; Short=OsSPO11-4; AltName: Full=OsSPO11D
LOC_Os05g31750	960	2	10	0	25	32	30	0.872353	2.93023	up	3.41e-05	0.00111057	-	-	GO:0005509//calcium ion binding;GO:0005544//calcium-dependent phospholipid binding	-	gi|937918864|dbj|BAS93782.1|/0/Os05g0382600 [Oryza sativa Japonica Group]
LOC_Os03g55420	975	1	0	12	36	15	37	0.900645	2.92781	up	0.000376761	0.00781056	ko00940//Phenylpropanoid biosynthesis;ko00360//Phenylalanine metabolism;ko01100//Metabolic pathways;ko01110//Biosynthesis of secondary metabolites	GO:0005576//extracellular region;GO:0016023//cytoplasmic, membrane-bounded vesicle	GO:0046872//metal ion binding;GO:0020037//heme binding;GO:0004601//peroxidase activity	GO:0098869//cellular oxidant detoxification;GO:0006979//response to oxidative stress;GO:0042744//hydrogen peroxide catabolic process;GO:0055114//oxidation-reduction process	gi|55700969|tpe|CAH69293.1|/0/TPA: class III peroxidase 51 precursor [Oryza sativa Japonica Group]
LOC_Os04g12960	1389	24	2	14	136.73	31	98	2.41614	2.92717	up	5.02e-06	0.000226926	-	GO:0043231//intracellular membrane-bounded organelle	GO:0080043//quercetin 3-O-glucosyltransferase activity;GO:0080044//quercetin 7-O-glucosyltransferase activity	GO:0009813//flavonoid biosynthetic process;GO:0052696//flavonoid glucuronidation	gi|38345011|emb|CAD40029.2|/0/OSJNBa0052O21.14 [Oryza sativa Japonica Group]
LOC_Os11g25590	4002	3.07	0	2.09	13.55	4.01	18.97	-0.185474	2.92568	up	0.00418699	0.0489096	ko03440//Homologous recombination;ko00240//Pyrimidine metabolism;ko01100//Metabolic pathways;ko03460//Fanconi anemia pathway;ko02020//Two-component system;ko02010//ABC transporters;ko00670//One carbon pool by folate	-	GO:0003676//nucleic acid binding;GO:0004190//aspartic-type endopeptidase activity;GO:0008270//zinc ion binding	GO:0006508//proteolysis;GO:0015074//DNA integration	gi|62734156|gb|AAX96265.1|/0/retrotransposon protein, putative, Ty3-gypsy sub-class [Oryza sativa Japonica Group]
LOC_Os11g19840	1125	29	2	100	425	59	361	4.06632	2.92367	up	0.000621717	0.0117459	ko00945//Stilbenoid, diarylheptanoid and gingerol biosynthesis;ko00944//Flavone and flavonol biosynthesis;ko00402//Benzoxazinoid biosynthesis	-	GO:0046983//protein dimerization activity;GO:0008757//S-adenosylmethionine-dependent methyltransferase activity;GO:0008171//O-methyltransferase activity	GO:0032259//methylation;GO:0019438//aromatic compound biosynthetic process	gi|62732812|gb|AAX94931.1|/0/O-methyltransferase [Oryza sativa Japonica Group]
LOC_Os05g46480	603	139	18	281	1497	434	898	5.79316	2.91242	up	1.15e-05	0.000459021	-	-	-	-	gi|937920221|dbj|BAS95139.1|;gi|158517754|sp|P0C5A4.1|LEA3_ORYSJ/9.44612e-61;5.89533e-67/Os05g0542500 [Oryza sativa Japonica Group];RecName: Full=Late embryogenesis abundant protein, group 3; Short=LEA-3
LOC_Os03g55670	675	14	8	19	67	62	145	2.45028	2.90627	up	4.89e-10	7.81e-08	-	GO:0009507//chloroplast	-	GO:0009793//embryo development ending in seed dormancy	gi|108711250|gb|ABF99045.1|/8.08044e-98/expressed protein [Oryza sativa Japonica Group]
LOC_Os02g36220	2466	3	10	4.83	28	64	32	1.33485	2.88775	up	2.89e-07	2.01e-05	ko00904//Diterpenoid biosynthesis;ko01100//Metabolic pathways;ko01110//Biosynthesis of secondary metabolites	GO:0009536//plastid;GO:0005739//mitochondrion	GO:0034280;GO:0034281;GO:0009899//ent-kaurene synthase activity;GO:0000287//magnesium ion binding;GO:0034282	GO:0051501//diterpene phytoalexin metabolic process;GO:0006952//defense response;GO:0009685//gibberellin metabolic process	gi|1002243449|ref|XP_015625952.1|;gi|75133931|sp|Q6Z5J6.1|KSL5_ORYSJ/0;0/PREDICTED: ent-pimara-8(14),15-diene synthase isoform X4 [Oryza sativa Japonica Group];RecName: Full=Ent-pimara-8(14),15-diene synthase; AltName: Full=Ent-kaurene synthase-like 5; Short=OsKS5; Short=OsKSL5; AltName: Full=Ent-kaurene synthase-like 6; Short=OsKS6
LOC_Os05g03690	5061	1.84	1	2	13.16	2.51	18.01	-0.272493	2.88736	up	0.00336151	0.041776	ko03440//Homologous recombination;ko00240//Pyrimidine metabolism;ko01100//Metabolic pathways;ko02020//Two-component system;ko02010//ABC transporters;ko00670//One carbon pool by folate	-	GO:0003964//RNA-directed DNA polymerase activity;GO:0003677//DNA binding;GO:0003723//RNA binding;GO:0004190//aspartic-type endopeptidase activity;GO:0008270//zinc ion binding	GO:0006278//RNA-dependent DNA biosynthetic process;GO:0006508//proteolysis;GO:0015074//DNA integration;GO:0006310//DNA recombination	gi|57863933|gb|AAS90689.2|/0/putative polyprotein [Oryza sativa Japonica Group]
LOC_Os11g35470	2445	2.88	3.77	0	7.56	21.16	18.68	0.107975	2.88547	up	0.000740959	0.0136098	-	GO:0009536//plastid	GO:0008234//cysteine-type peptidase activity	GO:0006508//proteolysis	gi|77551504|gb|ABA94301.1|/0/transposon protein, putative, CACTA, En/Spm sub-class [Oryza sativa Japonica Group]
LOC_Os06g13720	1197	13	6	8	98	25	54	1.85322	2.8767	up	3.3e-07	2.23e-05	ko00290//Valine, leucine and isoleucine biosynthesis;ko01120//Microbial metabolism in diverse environments;ko01100//Metabolic pathways;ko00620//Pyruvate metabolism;ko01110//Biosynthesis of secondary metabolites;ko00010//Glycolysis / Gluconeogenesis;ko00650//Butanoate metabolism;ko00020//Citrate cycle (TCA cycle)	GO:0005759//mitochondrial matrix	GO:0004739//pyruvate dehydrogenase (acetyl-transferring) activity	GO:0055114//oxidation-reduction process;GO:0006086//acetyl-CoA biosynthetic process from pyruvate;GO:0006096//glycolytic process	gi|75253319|sp|Q654V6.1|ODPA2_ORYSJ/0/RecName: Full=Pyruvate dehydrogenase E1 component subunit alpha-2, mitochondrial; Short=PDHE1-A; Flags: Precursor
LOC_Os03g61160	620	18	6	28	92	48	193	2.73784	2.8708	up	2.67e-07	1.88e-05	-	-	-	-	gi|108711863|gb|ABF99658.1|;gi|108711861|gb|ABF99656.1|;gi|108711865|gb|ABF99660.1|;gi|108711864|gb|ABF99659.1|;gi|108711862|gb|ABF99657.1|/4.96272e-102;7.00931e-119;9.87133e-103;5.88912e-61;1.10791e-119/expressed protein [Oryza sativa Japonica Group];expressed protein [Oryza sativa Japonica Group];expressed protein [Oryza sativa Japonica Group];expressed protein [Oryza sativa Japonica Group];exp…
LOC_Os02g37590	2250	8	2	4	46	23	24	0.973776	2.86859	up	3.3e-06	0.000157778	ko00564//Glycerophospholipid metabolism;ko00600//Sphingolipid metabolism;ko00511//Other glycan degradation	GO:0016023//cytoplasmic, membrane-bounded vesicle	GO:0008889//glycerophosphodiester phosphodiesterase activity	GO:0006629//lipid metabolic process	gi|113536806|dbj|BAF09189.1|/0/Os02g0588500 [Oryza sativa Japonica Group]
LOC_Os11g37950	453	99	72	65	674	527	346	4.90804	2.86235	up	2e-19	1.82e-16	-	GO:0016023//cytoplasmic, membrane-bounded vesicle	GO:0030246//carbohydrate binding;GO:0004518//nuclease activity	GO:0042742//defense response to bacterium;GO:0009626//plant-type hypersensitive response;GO:0090305//nucleic acid phosphodiester bond hydrolysis;GO:0050832//defense response to fungus;GO:0031640//killing of cells of other organism	gi|113645410|dbj|BAF28551.1|/6.96035e-91/Os11g0592000 [Oryza sativa Japonica Group]
LOC_Os02g37720	3153	19.16	0	0	23.7	28.3	71.57	1.35743	2.85658	up	0.00294883	0.0377482	-	-	-	-	gi|77554254|gb|ABA97050.1|/0/transposon protein, putative, CACTA, En/Spm sub-class [Oryza sativa Japonica Group]
LOC_Os09g26420	1092	162	249	132	1248	1344	1010	6.12043	2.85595	up	6.32e-20	6.06e-17	-	GO:0005634//nucleus	GO:0003700//transcription factor activity, sequence-specific DNA binding;GO:0003677//DNA binding	GO:0006351//transcription, DNA-templated;GO:0006355//regulation of transcription, DNA-templated	gi|194396113|gb|ACF60474.1|/0/EREBP transcription factor [Oryza sativa Japonica Group]
LOC_Os03g18030	1164	8	17	13	68	68	114	2.32432	2.85567	up	2.89e-11	5.83e-09	ko00941//Flavonoid biosynthesis;ko01100//Metabolic pathways;ko01110//Biosynthesis of secondary metabolites	-	GO:0051213//dioxygenase activity;GO:0005506//iron ion binding	GO:0055114//oxidation-reduction process	gi|125543430|gb|EAY89569.1|;gi|125543432|gb|EAY89571.1|/0;9.746e-173/hypothetical protein OsI_11101 [Oryza sativa Indica Group];hypothetical protein OsI_11102 [Oryza sativa Indica Group]
LOC_Os02g42780	2025	7	1	2	8	15	43	0.533518	2.85361	up	0.000924272	0.0161126	ko00903//Limonene and pinene degradation;ko05142//Chagas disease (American trypanosomiasis);ko05133//Pertussis;ko05145//Toxoplasmosis;ko00642//Ethylbenzene degradation;ko00362//Benzoate degradation;ko04722//Neurotrophin signaling pathway;ko05162//Measles;ko00240//Pyrimidine metabolism;ko00051//Fructose and mannose metabolism;ko04620//Toll-like receptor signaling pathway;ko04976//Bile secretion;ko…	GO:0016021//integral component of membrane;GO:0016023//cytoplasmic, membrane-bounded vesicle	GO:0030246//carbohydrate binding;GO:0005524//ATP binding;GO:0004674//protein serine/threonine kinase activity	GO:0006468//protein phosphorylation	gi|113537078|dbj|BAF09461.1|/0/Os02g0640500 [Oryza sativa Japonica Group]
LOC_Os04g09260	1278	3	6	2	14	38	23	0.679311	2.84583	up	3.77e-05	0.00120356	ko00073//Cutin, suberine and wax biosynthesis	-	GO:0016747//transferase activity, transferring acyl groups other than amino-acyl groups	-	gi|32483192|emb|CAE02223.1|/0/OSJNBb0015C06.1 [Oryza sativa Japonica Group]
LOC_Os04g43680	774	16	22	21	133	73	174	2.92311	2.84392	up	6.11e-12	1.45e-09	-	-	-	-	gi|73921025|sp|Q7XBH4.2|MYB4_ORYSJ/2.79143e-140/RecName: Full=Myb-related protein Myb4; AltName: Full=OsMyb4; AltName: Full=Transcription factor RLTR1
LOC_Os07g34570	1068	36	37	61	425	287	151	4.07455	2.84323	up	2.3e-13	7.35e-11	-	GO:0009570//chloroplast stroma;GO:0005829//cytosol	GO:0016491//oxidoreductase activity	GO:0009228//thiamine biosynthetic process;GO:0006950//response to stress;GO:0052837//thiazole biosynthetic process;GO:0055114//oxidation-reduction process	gi|32352138|dbj|BAC78562.1|;gi|937926949|dbj|BAT01866.1|/0;0/thiamine biosynthetic enzyme [Oryza sativa Japonica Group];Os07g0529600 [Oryza sativa Japonica Group]
LOC_Os12g26790	4224	7.96	1.86	0	17.66	9.49	37.11	0.506329	2.84013	up	0.00132096	0.0212866	ko03440//Homologous recombination;ko00240//Pyrimidine metabolism;ko01100//Metabolic pathways;ko03460//Fanconi anemia pathway;ko02020//Two-component system;ko02010//ABC transporters;ko00670//One carbon pool by folate	-	GO:0003676//nucleic acid binding;GO:0004190//aspartic-type endopeptidase activity;GO:0008270//zinc ion binding	GO:0006508//proteolysis;GO:0015074//DNA integration	gi|77555315|gb|ABA98111.1|/0/retrotransposon protein, putative, Ty3-gypsy subclass [Oryza sativa Japonica Group]
LOC_Os10g39680	786	89	86	80	345	534	765	5.00067	2.83782	up	3.18e-18	2.54e-15	ko00500//Starch and sucrose metabolism;ko00520//Amino sugar and nucleotide sugar metabolism;ko01100//Metabolic pathways;ko01110//Biosynthesis of secondary metabolites	GO:0016023//cytoplasmic, membrane-bounded vesicle	GO:0004568//chitinase activity	GO:0006032//chitin catabolic process;GO:0000272//polysaccharide catabolic process;GO:0016998//cell wall macromolecule catabolic process	gi|75141289|sp|Q7XCK6.1|CHI8_ORYSJ/2.38761e-172/RecName: Full=Chitinase 8; AltName: Full=Class II chitinase a; Short=OsChia2a; AltName: Full=Pathogenesis related (PR)-3 chitinase 8; Flags: Precursor
LOC_Os01g51570	1017	4	56	9	203	155	108	3.19736	2.8378	up	2.38e-05	0.00082763	-	GO:0046658//anchored component of plasma membrane;GO:0016023//cytoplasmic, membrane-bounded vesicle	GO:0004553//hydrolase activity, hydrolyzing O-glycosyl compounds;GO:0030247//polysaccharide binding	GO:0005975//carbohydrate metabolic process	gi|1002236502|ref|XP_015622443.1|/0/PREDICTED: glucan endo-1,3-beta-glucosidase GII [Oryza sativa Japonica Group]
LOC_Os12g01740	1542	2	2.22	4.62	18.01	19.91	20.89	0.382783	2.83664	up	3.23e-05	0.00106431	ko05142//Chagas disease (American trypanosomiasis);ko05133//Pertussis;ko05145//Toxoplasmosis;ko04626//Plant-pathogen interaction;ko04722//Neurotrophin signaling pathway;ko05162//Measles;ko04620//Toll-like receptor signaling pathway;ko05164//Influenza A;ko05140//Leishmaniasis;ko05152//Tuberculosis;ko04064//NF-kappa B signaling pathway;ko04210//Apoptosis	GO:0016021//integral component of membrane	GO:0005524//ATP binding;GO:0004674//protein serine/threonine kinase activity	GO:0006468//protein phosphorylation	gi|222616487|gb|EEE52619.1|/0/hypothetical protein OsJ_34956 [Oryza sativa Japonica Group]
LOC_Os08g35600	1437	2	1	2	14	9	11	-0.265508	2.83546	up	0.00166653	0.0251435	ko00903//Limonene and pinene degradation;ko00642//Ethylbenzene degradation;ko00362//Benzoate degradation;ko00240//Pyrimidine metabolism;ko00051//Fructose and mannose metabolism;ko04976//Bile secretion;ko01120//Microbial metabolism in diverse environments;ko01100//Metabolic pathways;ko00627//Aminobenzoate degradation;ko00350//Tyrosine metabolism;ko02010//ABC transporters	GO:0009536//plastid	GO:0004672//protein kinase activity;GO:0005524//ATP binding	GO:0006468//protein phosphorylation	gi|113623937|dbj|BAF23882.1|/0/Os08g0457400 [Oryza sativa Japonica Group]
LOC_Os01g24780	1572	2	6	2	16	40	12	0.551288	2.82317	up	0.000285847	0.00633609	ko00908//Zeatin biosynthesis;ko01100//Metabolic pathways;ko00905//Brassinosteroid biosynthesis;ko01110//Biosynthesis of secondary metabolites	GO:0016021//integral component of membrane;GO:0016023//cytoplasmic, membrane-bounded vesicle	GO:0004497//monooxygenase activity;GO:0005506//iron ion binding;GO:0020037//heme binding;GO:0016705//oxidoreductase activity, acting on paired donors, with incorporation or reduction of molecular oxygen	GO:0055114//oxidation-reduction process	gi|113532511|dbj|BAF04894.1|/0/Os01g0349800 [Oryza sativa Japonica Group]
LOC_Os08g05780	831	3	2	4	13	19	27	0.389817	2.81942	up	6.61e-05	0.00191097	-	GO:0016021//integral component of membrane	-	-	gi|113622980|dbj|BAF22925.1|/3.43216e-174/Os08g0153900 [Oryza sativa Japonica Group]
LOC_Os06g42710	2637	6.99	2.27	5.99	43.93	15.95	36.8	1.03768	2.815	up	4.97e-06	0.000225376	-	-	GO:0005488	-	gi|108706843|gb|ABF94638.1|/0/transposon protein, putative, Mutator sub-class [Oryza sativa Japonica Group]
LOC_Os12g38720	309	12	34.97	8	84.91	99.78	170.72	2.82411	2.80786	up	2.89e-08	2.73e-06	-	-	-	-	gi|77556204|gb|ABA99000.1|/1.85582e-35/expressed protein [Oryza sativa Japonica Group]
LOC_Os11g04830	2661	7	7	6	95.01	19	12	1.39633	2.80175	up	0.000166814	0.00407495	-	GO:0016021//integral component of membrane	-	GO:0007165//signal transduction	gi|77548641|gb|ABA91438.1|/0/expressed protein [Oryza sativa Japonica Group]
LOC_Os02g30300	1140	5	1	6	33	8	34	0.711174	2.80043	up	0.000220855	0.00515221	-	-	-	-	gi|48716133|dbj|BAD23173.1|/1.24694e-162/F-box protein-like [Oryza sativa Japonica Group]
LOC_Os01g43580	2124	2	3	4	19	13	26	0.376996	2.79928	up	8.73e-05	0.00239554	-	GO:0005886//plasma membrane;GO:0005634//nucleus;GO:0005871//kinesin complex;GO:0005874//microtubule	GO:0008017//microtubule binding;GO:0016887//ATPase activity;GO:0005524//ATP binding;GO:0003777//microtubule motor activity	GO:0007018//microtubule-based movement	gi|1002225205|ref|XP_015620912.1|/0/PREDICTED: kinesin-13A [Oryza sativa Japonica Group]
LOC_Os10g37340	1395	287	63	138	1495	534	910	5.85996	2.78575	up	8.6e-09	9.26e-07	ko00450//Selenocompound metabolism;ko00270//Cysteine and methionine metabolism	GO:0005829//cytosol	GO:0030170//pyridoxal phosphate binding;GO:0018826//methionine gamma-lyase activity	GO:0051289//protein homotetramerization	gi|31433074|gb|AAP54634.1|/0/Cys/Met metabolism PLP-dependent enzyme family protein, expressed [Oryza sativa Japonica Group]
LOC_Os09g34160	2928	26	5	34	227	61	102	2.97058	2.78303	up	1.1e-06	6.06e-05	ko04626//Plant-pathogen interaction	-	-	-	gi|937934061|dbj|BAT08976.1|/0/Os09g0517200 [Oryza sativa Japonica Group]
LOC_Os10g17260	1581	8	14	10	80	85	37	2.0223	2.77725	up	1.49e-09	2.1e-07	ko00941//Flavonoid biosynthesis;ko01100//Metabolic pathways;ko01110//Biosynthesis of secondary metabolites;ko00944//Flavone and flavonol biosynthesis	GO:0016021//integral component of membrane	GO:0016709//oxidoreductase activity, acting on paired donors, with incorporation or reduction of molecular oxygen, NAD(P)H as one donor, and incorporation of one atom of oxygen;GO:0020037//heme binding;GO:0005506//iron ion binding	GO:0044550//secondary metabolite biosynthetic process;GO:0055114//oxidation-reduction process	gi|113638947|dbj|BAF26252.1|/0/Os10g0320100 [Oryza sativa Japonica Group]
LOC_Os02g01380	1113	3	2	0	9	11	13	-0.295395	2.77487	up	0.00273711	0.0357053	-	-	-	-	gi|113535144|dbj|BAF07527.1|/6.57918e-141/Os02g0104500 [Oryza sativa Japonica Group]
LOC_Os09g10340	1530	2	9	1	28	20	29	0.739111	2.77345	up	7.53e-05	0.00214232	ko00943//Isoflavonoid biosynthesis;ko00624//Polycyclic aromatic hydrocarbon degradation;ko00903//Limonene and pinene degradation;ko00904//Diterpenoid biosynthesis;ko01120//Microbial metabolism in diverse environments;ko01100//Metabolic pathways;ko00627//Aminobenzoate degradation;ko00945//Stilbenoid, diarylheptanoid and gingerol biosynthesis;ko00363//Bisphenol degradation;ko01110//Biosynthesis of …	GO:0016020//membrane	GO:0016709//oxidoreductase activity, acting on paired donors, with incorporation or reduction of molecular oxygen, NAD(P)H as one donor, and incorporation of one atom of oxygen;GO:0020037//heme binding;GO:0005506//iron ion binding	GO:0044550//secondary metabolite biosynthetic process;GO:0055114//oxidation-reduction process	gi|113630984|dbj|BAF24665.1|/0/Os09g0275400 [Oryza sativa Japonica Group]
LOC_Os07g34070	1092	1	6	3	19	22	23	0.497542	2.76703	up	9.52e-05	0.00257066	-	GO:0016021//integral component of membrane;GO:0005886//plasma membrane	GO:0022857//transmembrane transporter activity	GO:0055085//transmembrane transport	gi|113611359|dbj|BAF21737.1|/0/Os07g0524900 [Oryza sativa Japonica Group]
LOC_Os04g49980	369	3	1	8	34	10	29	0.67889	2.76004	up	0.000233882	0.00538407	-	-	-	-	gi|38346714|emb|CAE04864.2|/7.77782e-48/OSJNBa0086O06.12 [Oryza sativa Japonica Group]
LOC_Os01g67630	1674	4	7	3	23	55	12	0.917371	2.75789	up	4.82e-05	0.00148666	-	GO:0016020//membrane;GO:0016021//integral component of membrane	GO:0005215//transporter activity	GO:0006857//oligopeptide transport	gi|937899785|dbj|BAS75765.1|;gi|215769147|dbj|BAH01376.1|/0;0/Os01g0902700 [Oryza sativa Japonica Group];unnamed protein product [Oryza sativa Japonica Group]
LOC_Os12g39630	1086	12	6	17	95	35	80	2.10223	2.75751	up	2.88e-08	2.73e-06	ko04075//Plant hormone signal transduction	GO:0005737//cytoplasm;GO:0005634//nucleus	GO:0004674//protein serine/threonine kinase activity;GO:0005524//ATP binding	GO:0006468//protein phosphorylation;GO:0035556//intracellular signal transduction;GO:0009738//abscisic acid-activated signaling pathway	gi|71153748|sp|Q75V57.1|SAPK9_ORYSJ/0/RecName: Full=Serine/threonine-protein kinase SAPK9; AltName: Full=Osmotic stress/abscisic acid-activated protein kinase 9
LOC_Os08g31850	1137	17	0	30	144	43	88	2.48125	2.75625	up	0.000102862	0.00273576	-	-	-	-	gi|113623765|dbj|BAF23710.1|/0/Os08g0412700 [Oryza sativa Japonica Group]
LOC_Os09g27040	1920	26	6	25	66	101	174	2.76948	2.75268	up	1.29e-08	1.36e-06	-	GO:0016021//integral component of membrane;GO:0016023//cytoplasmic, membrane-bounded vesicle	-	-	gi|113631523|dbj|BAF25204.1|/0/Os09g0442400 [Oryza sativa Japonica Group]
LOC_Os02g43194	1464	4	7	1	22	33	21	0.712948	2.74868	up	2.63e-05	0.000905727	ko00903//Limonene and pinene degradation;ko00310//Lysine degradation;ko02030//Bacterial chemotaxis;ko00071//Fatty acid metabolism;ko00330//Arginine and proline metabolism;ko01120//Microbial metabolism in diverse environments;ko01100//Metabolic pathways;ko00340//Histidine metabolism;ko00640//Propanoate metabolism;ko00380//Tryptophan metabolism;ko00280//Valine, leucine and isoleucine degradation;ko…	GO:0016021//integral component of membrane	GO:0004029//aldehyde dehydrogenase (NAD) activity;GO:0004030//aldehyde dehydrogenase [NAD(P)+] activity;GO:0004028//3-chloroallyl aldehyde dehydrogenase activity	GO:0006081//cellular aldehyde metabolic process;GO:0055114//oxidation-reduction process	gi|113537106|dbj|BAF09489.1|/0/Os02g0646500 [Oryza sativa Japonica Group]
LOC_Os02g48210	2244	16	9	8	45	70	85	2.01982	2.73784	up	5.01e-10	7.95e-08	ko00903//Limonene and pinene degradation;ko05142//Chagas disease (American trypanosomiasis);ko05133//Pertussis;ko05145//Toxoplasmosis;ko00642//Ethylbenzene degradation;ko00362//Benzoate degradation;ko04722//Neurotrophin signaling pathway;ko05162//Measles;ko00240//Pyrimidine metabolism;ko00051//Fructose and mannose metabolism;ko04620//Toll-like receptor signaling pathway;ko05164//Influenza A;ko011…	GO:0016021//integral component of membrane;GO:0016023//cytoplasmic, membrane-bounded vesicle;GO:0005739//mitochondrion	GO:0030246//carbohydrate binding;GO:0005524//ATP binding;GO:0004674//protein serine/threonine kinase activity	GO:0006468//protein phosphorylation	gi|113537440|dbj|BAF09823.1|/0/Os02g0712700 [Oryza sativa Japonica Group]
LOC_Os05g31020	1323	45	18	97	541	102	266	4.19119	2.71688	up	3.29e-06	0.000157778	ko03015//mRNA surveillance pathway	GO:0005737//cytoplasm	GO:0016149//translation release factor activity, codon specific	GO:0006415//translational termination	gi|113578921|dbj|BAF17284.1|/0/Os05g0373900 [Oryza sativa Japonica Group]
LOC_Os01g12820	993	8	0	25	86	26	76	1.95743	2.71501	up	0.000224837	0.00521971	-	GO:0016021//integral component of membrane	-	-	gi|113532009|dbj|BAF04392.1|/2.94311e-159/Os01g0228500 [Oryza sativa Japonica Group]
LOC_Os05g33400	1314	6	0	9	20	19	49	0.922186	2.71468	up	0.000175188	0.0042578	-	GO:0016023//cytoplasmic, membrane-bounded vesicle	GO:0004190//aspartic-type endopeptidase activity	GO:0030163//protein catabolic process;GO:0006508//proteolysis	gi|113579047|dbj|BAF17410.1|/0/Os05g0402900 [Oryza sativa Japonica Group]
LOC_Os05g05520	2895	5.59	3.01	5.01	29.9	18.37	33.13	0.819331	2.71447	up	6e-06	0.000263306	ko04120//Ubiquitin mediated proteolysis	-	GO:0003676//nucleic acid binding	-	gi|108706843|gb|ABF94638.1|/0/transposon protein, putative, Mutator sub-class [Oryza sativa Japonica Group]
LOC_Os10g02260	1731	2	3	2	21	12	10	0.0204458	2.70387	up	0.00126356	0.0205165	-	GO:0016021//integral component of membrane	GO:0005215//transporter activity	GO:0006857//oligopeptide transport	gi|1002299478|ref|XP_015613144.1|;gi|78707635|gb|ABB46610.1|/0;0/PREDICTED: protein NRT1/ PTR FAMILY 8.3 [Oryza sativa Japonica Group];POT family protein, expressed [Oryza sativa Japonica Group]
LOC_Os06g18140	1458	8	8	3	38	41	35	1.25715	2.70298	up	5.25e-08	4.52e-06	ko00943//Isoflavonoid biosynthesis;ko00940//Phenylpropanoid biosynthesis	GO:0043231//intracellular membrane-bounded organelle	GO:0080043//quercetin 3-O-glucosyltransferase activity;GO:0080044//quercetin 7-O-glucosyltransferase activity	GO:0009813//flavonoid biosynthetic process;GO:0052696//flavonoid glucuronidation	gi|113595456|dbj|BAF19330.1|/0/Os06g0289200 [Oryza sativa Japonica Group]
LOC_Os04g59330	948	1	5	2	16	11	22	0.180975	2.70218	up	0.000933326	0.0162409	-	GO:0016020//membrane	-	-	gi|113565917|dbj|BAF16260.1|/6.80981e-163/Os04g0689500, partial [Oryza sativa Japonica Group]
LOC_Os01g56330	2691	10	6	4	58	27	33	1.31378	2.70029	up	9.34e-07	5.32e-05	ko00903//Limonene and pinene degradation;ko05142//Chagas disease (American trypanosomiasis);ko05133//Pertussis;ko05145//Toxoplasmosis;ko04626//Plant-pathogen interaction;ko00642//Ethylbenzene degradation;ko00362//Benzoate degradation;ko04722//Neurotrophin signaling pathway;ko05162//Measles;ko00240//Pyrimidine metabolism;ko00051//Fructose and mannose metabolism;ko04620//Toll-like receptor signalin…	GO:0016021//integral component of membrane;GO:0016023//cytoplasmic, membrane-bounded vesicle	GO:0005524//ATP binding;GO:0004674//protein serine/threonine kinase activity	GO:0006468//protein phosphorylation	gi|113533903|dbj|BAF06286.1|/0/Os01g0769700 [Oryza sativa Japonica Group]
LOC_Os02g36140	2490	7	75	19	158	357	113	3.6118	2.69783	up	2.98e-05	0.000999763	ko00904//Diterpenoid biosynthesis;ko01100//Metabolic pathways;ko01110//Biosynthesis of secondary metabolites	GO:0009507//chloroplast;GO:0005739//mitochondrion	GO:0009899//ent-kaurene synthase activity;GO:0034277//ent-cassa-12,15-diene synthase activity;GO:0000287//magnesium ion binding	GO:0051501//diterpene phytoalexin metabolic process;GO:0006952//defense response;GO:0009686//gibberellin biosynthetic process	gi|122171243|sp|Q0E088.1|KSL7_ORYSJ/0/RecName: Full=Ent-cassa-12,15-diene synthase; AltName: Full=Diterpene cyclase 1; Short=OsDTC1; AltName: Full=Ent-kaurene synthase-like 7; Short=OsKSL7; AltName: Full=OsKS3
LOC_Os03g52910	1035	14	15	11	133	35	64	2.25205	2.69187	up	2.18e-07	1.59e-05	-	GO:0016021//integral component of membrane	-	-	gi|108710985|gb|ABF98780.1|/0/expressed protein [Oryza sativa Japonica Group]
LOC_Os01g50910	648	4	0	8	38	8	23	0.616736	2.6915	up	0.00137421	0.0219233	-	-	-	-	gi|13872923|dbj|BAB44029.1|/1.83624e-76/WSI18 protein induced by water stress [Oryza sativa Japonica Group]
LOC_Os03g02874	456	8	0	32.03	89.65	28	105.01	2.19778	2.68934	up	0.000571637	0.0109968	-	-	-	-	gi|255678726|dbj|BAH94471.1|;gi|255677297|dbj|BAH93669.1|/4.56169e-20;8.82629e-51/Os09g0269500 [Oryza sativa Japonica Group];Os06g0662550, partial [Oryza sativa Japonica Group]
LOC_Os02g52010	987	13	2	14	110	21	33	1.77285	2.6875	up	9.22e-05	0.00250077	-	-	-	-	gi|113537701|dbj|BAF10084.1|/0/Os02g0756800 [Oryza sativa Japonica Group]
LOC_Os05g19740	2871	5.22	0	1.56	11.08	10.36	19.03	-0.0480492	2.68642	up	0.0024221	0.0328939	ko03440//Homologous recombination;ko00240//Pyrimidine metabolism;ko01100//Metabolic pathways;ko03460//Fanconi anemia pathway;ko02020//Two-component system;ko02010//ABC transporters;ko00670//One carbon pool by folate	GO:0009536//plastid	GO:0003964//RNA-directed DNA polymerase activity;GO:0003676//nucleic acid binding;GO:0004190//aspartic-type endopeptidase activity;GO:0008270//zinc ion binding	GO:0006278//RNA-dependent DNA biosynthetic process;GO:0006508//proteolysis;GO:0015074//DNA integration	gi|38344617|emb|CAE02516.2|/0/OSJNBb0003A12.3 [Oryza sativa Japonica Group]
LOC_Os07g10770	3246	35	58	31	263	176	280	3.84613	2.67799	up	3.33e-14	1.21e-11	-	GO:0005886//plasma membrane;GO:0016021//integral component of membrane	GO:0046872//metal ion binding;GO:0016760//cellulose synthase (UDP-forming) activity	GO:0071555//cell wall organization;GO:0030244//cellulose biosynthetic process	gi|75149238|sp|Q84ZN6.1|CESA8_ORYSJ/0/RecName: Full=Probable cellulose synthase A catalytic subunit 8 [UDP-forming]; AltName: Full=OsCesA8
LOC_Os12g12080	432	23	0	57	229	50	158	3.15159	2.67446	up	0.00113878	0.018956	-	-	-	-	gi|108862346|gb|ABG21920.1|;gi|108862348|gb|ABG21921.1|;gi|108862347|gb|ABA96768.2|;gi|108862345|gb|ABG21919.1|/1.6336e-85;9.39052e-53;3.70414e-86;2.57825e-46/expressed protein [Oryza sativa Japonica Group];expressed protein [Oryza sativa Japonica Group];expressed protein [Oryza sativa Japonica Group];expressed protein [Oryza sativa Japonica Group]
LOC_Os07g49310	1242	3	2	2	23	13	6	-0.00576955	2.67431	up	0.00274763	0.0358182	ko01040//Biosynthesis of unsaturated fatty acids	GO:0016021//integral component of membrane;GO:0005739//mitochondrion	GO:0016717//oxidoreductase activity, acting on paired donors, with oxidation of a pair of donors resulting in the reduction of molecular oxygen to two molecules of water	GO:0055114//oxidation-reduction process;GO:0006629//lipid metabolic process	gi|937928446|dbj|BAT03363.1|;gi|57014072|gb|AAW32557.1|/0;0/Os07g0693800 [Oryza sativa Japonica Group];FAD8 [Oryza sativa Japonica Group]
LOC_Os06g16640	1230	4	11	5	50.43	58.25	11.14	1.31661	2.67388	up	4.58e-05	0.00142432	-	GO:0016023//cytoplasmic, membrane-bounded vesicle	-	-	gi|55296403|dbj|BAD68526.1|/0/carboxyl-terminal peptidase-like [Oryza sativa Japonica Group]
LOC_Os08g29980	4362	10	7	0	15	19	65	1.08615	2.66971	up	0.000649331	0.0121955	ko05166//HTLV-I infection;ko04115//p53 signaling pathway;ko00900//Terpenoid backbone biosynthesis;ko04110//Cell cycle;ko00908//Zeatin biosynthesis;ko05202//Transcriptional misregulation in cancer;ko01100//Metabolic pathways;ko03008//Ribosome biogenesis in eukaryotes;ko04064//NF-kappa B signaling pathway;ko01110//Biosynthesis of secondary metabolites;ko04210//Apoptosis;ko03018//RNA degradation	-	GO:0005488	-	gi|113623687|dbj|BAF23632.1|/0/Os08g0389500 [Oryza sativa Japonica Group]
LOC_Os01g24010	4356	13	29	29	187	149	75	3.03783	2.66811	up	2.25e-10	3.89e-08	ko03040//Spliceosome;ko04976//Bile secretion;ko02010//ABC transporters	GO:0005886//plasma membrane;GO:0016021//integral component of membrane	GO:0042626//ATPase activity, coupled to transmembrane movement of substances;GO:0005524//ATP binding	GO:0055085//transmembrane transport	gi|75330328|sp|Q8LQX2.1|AB32G_ORYSJ/0/RecName: Full=ABC transporter G family member 32; Short=OsABCG32; AltName: Full=Pleiotropic drug resistance protein 16; Short=OsPDR16
LOC_Os03g10640	3060	30	41	43	409	65	167	3.69991	2.66409	up	5.62e-07	3.42e-05	ko00230//Purine metabolism	GO:0043231//intracellular membrane-bounded organelle;GO:0005887//integral component of plasma membrane	GO:0005388//calcium-transporting ATPase activity;GO:0005516//calmodulin binding;GO:0046872//metal ion binding;GO:0005524//ATP binding	GO:0070588//calcium ion transmembrane transport	gi|113547778|dbj|BAF11221.1|/0/Os03g0203700 [Oryza sativa Japonica Group]
LOC_Os05g08080	3201	10.1	2.36	2.7	11.86	7.92	65.74	0.90191	2.65826	up	0.00211224	0.02963	-	-	GO:0008270//zinc ion binding	-	gi|52353740|gb|AAU44306.1|/0/putative polyprotein [Oryza sativa Japonica Group]
LOC_Os02g51230	3522	5.87	0	5.73	28.85	6.16	29.96	0.546372	2.65254	up	0.00237166	0.0323968	-	GO:0009536//plastid	GO:0008234//cysteine-type peptidase activity	GO:0006508//proteolysis	gi|58531971|emb|CAE03081.3|/0/OSJNBa0089E12.19 [Oryza sativa Japonica Group]
LOC_Os03g59430	1518	7	16	12	66	72	63	2.03845	2.64977	up	5.64e-11	1.09e-08	ko00052//Galactose metabolism	-	GO:0047274//galactinol-sucrose galactosyltransferase activity	-	gi|108711674|gb|ABF99469.1|/0/Raffinose synthase or seed imbibition protein Sip1 containing protein, expressed [Oryza sativa Japonica Group]
LOC_Os12g13380	726	10	4	10	67	30	38	1.50267	2.64834	up	3.85e-07	2.51e-05	ko00230//Purine metabolism;ko00240//Pyrimidine metabolism;ko01100//Metabolic pathways;ko01110//Biosynthesis of secondary metabolites	GO:0005737//cytoplasm	GO:0004017//adenylate kinase activity;GO:0005524//ATP binding	GO:0006163//purine nucleotide metabolic process;GO:0046939//nucleotide phosphorylation	gi|585337|sp|Q08479.1|KAD3_ORYSJ/7.3954e-178/RecName: Full=Adenylate kinase 3; AltName: Full=ATP-AMP transphosphorylase 3; AltName: Full=ATP:AMP phosphotransferase; AltName: Full=Adenylate kinase A; Short=AK A; AltName: Full=Adenylate monophosphate kinase 3
LOC_Os02g22160	1320	3	3	16	26	28	69	1.37659	2.64828	up	4.17e-05	0.00130756	-	GO:0016021//integral component of membrane	GO:0008375//acetylglucosaminyltransferase activity	-	gi|113536242|dbj|BAF08625.1|/0/Os02g0327500 [Oryza sativa Japonica Group]
LOC_Os04g03920	1416	3	4	2	13	6	33	0.266786	2.64513	up	0.00272896	0.0356485	-	GO:0016021//integral component of membrane	-	-	gi|38346513|emb|CAE03808.2|/0/OSJNBa0027H09.8 [Oryza sativa Japonica Group]
LOC_Os01g56690	822	2	6	4	10	12	47	0.619411	2.64155	up	0.000880701	0.0155509	-	-	-	-	gi|255673731|dbj|BAH91314.1|/4.20052e-118/Os01g0773800 [Oryza sativa Japonica Group]
LOC_Os12g23660	3249	2	2	7.01	24.42	4	33	0.47918	2.63574	up	0.00265592	0.0350044	-	-	-	GO:0044260;GO:0090304	gi|108862577|gb|ABA97931.2|/0/retrotransposon protein, putative, Ty3-gypsy subclass [Oryza sativa Japonica Group]
LOC_Os12g02340	357	17	21	21	116	115	101	2.74297	2.63334	up	2e-15	9.83e-13	-	GO:0016023//cytoplasmic, membrane-bounded vesicle;GO:0016021//integral component of membrane	GO:0008289//lipid binding	GO:0006869//lipid transport	gi|77553491|gb|ABA96287.1|;gi|937940686|dbj|BAT15598.1|/4.25145e-38;1.20356e-64/Nonspecific lipid-transfer protein 3 precursor, putative, expressed [Oryza sativa Japonica Group];Os12g0115500 [Oryza sativa Japonica Group]
LOC_Os01g18050	1344	1	4	2	12	13	16	-0.0282023	2.62517	up	0.00164032	0.0248065	ko04540//Gap junction;ko04145//Phagosome;ko05130//Pathogenic Escherichia coli infection	GO:0005737//cytoplasm;GO:0005874//microtubule	GO:0005200//structural constituent of cytoskeleton;GO:0005525//GTP binding;GO:0003924//GTPase activity	GO:0007018//microtubule-based movement	gi|661890154|emb|CDP06213.1|/0/unnamed protein product [Coffea canephora]
LOC_Os04g22080	1170	3	1	2	6	14	15	-0.215205	2.62066	up	0.00372381	0.0450881	-	GO:0005576//extracellular region;GO:0005618//cell wall	GO:0045735//nutrient reservoir activity;GO:0046564//oxalate decarboxylase activity;GO:0030145//manganese ion binding	GO:0033609//oxalate metabolic process	gi|38568035|emb|CAD40409.3|/0/OSJNBa0065J03.5 [Oryza sativa Japonica Group]
LOC_Os03g31200	4371	7.99	0	3.46	26.5	6.19	30.05	0.506329	2.61812	up	0.0028098	0.0363904	ko04978//Mineral absorption;ko00908//Zeatin biosynthesis;ko01100//Metabolic pathways;ko03008//Ribosome biogenesis in eukaryotes;ko01110//Biosynthesis of secondary metabolites;ko03018//RNA degradation	GO:0016021//integral component of membrane	GO:0003676//nucleic acid binding;GO:0008270//zinc ion binding	GO:0015074//DNA integration	gi|41469360|gb|AAS07202.1|/0/putative integrase [Oryza sativa Japonica Group]
LOC_Os02g53850	2187	3	5	2	28	25	5	0.386148	2.61669	up	0.00204227	0.0289965	-	GO:0044464	-	-	gi|222623776|gb|EEE57908.1|/0/hypothetical protein OsJ_08597 [Oryza sativa Japonica Group]
LOC_Os01g42110	780	9	4	11	69	21	41	1.47195	2.61423	up	4.17e-06	0.000192931	-	GO:0005887//integral component of plasma membrane	GO:0051119//sugar transmembrane transporter activity	GO:0034219//carbohydrate transmembrane transport	gi|75157485|sp|Q8LR09.1|SWT6A_ORYSJ/1.85653e-167/RecName: Full=Bidirectional sugar transporter SWEET6a; Short=OsSWEET6a
LOC_Os06g18770	939	2	1	6	14	8	28	0.220055	2.61154	up	0.00189795	0.0276769	-	-	GO:0004523//RNA-DNA hybrid ribonuclease activity;GO:0003964//RNA-directed DNA polymerase activity;GO:0003677//DNA binding;GO:0003723//RNA binding	GO:0090502//RNA phosphodiester bond hydrolysis, endonucleolytic;GO:0006278//RNA-dependent DNA biosynthetic process;GO:0015074//DNA integration;GO:0006310//DNA recombination	gi|110288686|gb|AAP52380.2|/4.48937e-160/retrotransposon protein, putative, Ty3-gypsy subclass [Oryza sativa Japonica Group]
LOC_Os08g02230	1770	19	34	18	40	195	166	2.9981	2.6057	up	4.11e-07	2.66e-05	-	GO:0016020//membrane	GO:0050660//flavin adenine dinucleotide binding;GO:0003885//D-arabinono-1,4-lactone oxidase activity	GO:0055114//oxidation-reduction process	gi|113622819|dbj|BAF22764.1|/0/Os08g0114300 [Oryza sativa Japonica Group]
LOC_Os03g55660	2025	4	2	7	26	10	35	0.663094	2.60058	up	0.000243744	0.00556086	ko03013//RNA transport	-	-	-	gi|108711249|gb|ABF99044.1|/0/nucleoporin, putative, expressed [Oryza sativa Japonica Group]
LOC_Os06g25010	747	41	11	49	192	106	238	3.44236	2.59919	up	5.75e-09	6.56e-07	ko00500//Starch and sucrose metabolism;ko00520//Amino sugar and nucleotide sugar metabolism;ko01100//Metabolic pathways;ko01110//Biosynthesis of secondary metabolites	GO:0005576//extracellular region;GO:0016023//cytoplasmic, membrane-bounded vesicle	GO:0004568//chitinase activity;GO:0008061//chitin binding	GO:0006032//chitin catabolic process;GO:0006952//defense response;GO:0045493//xylan catabolic process	gi|255677030|dbj|BAF19513.2|/5.11185e-168/Os06g0356800 [Oryza sativa Japonica Group]
LOC_Os08g17870	2085	5	0	2	21	8	10	-0.0780414	2.59699	up	0.00427475	0.0497105	-	-	-	-	gi|222640261|gb|EEE68393.1|/0/hypothetical protein OsJ_26729 [Oryza sativa Japonica Group]
LOC_Os10g38360	702	39	28	22	138	161	187	3.28904	2.59569	up	1.03e-15	5.51e-13	ko00980//Metabolism of xenobiotics by cytochrome P450;ko05200//Pathways in cancer;ko00480//Glutathione metabolism;ko00982//Drug metabolism - cytochrome P450;ko05215//Prostate cancer	GO:0005737//cytoplasm	GO:0004364//glutathione transferase activity	GO:0009407//toxin catabolic process;GO:0006749//glutathione metabolic process	gi|31433189|gb|AAP54731.1|/4.40837e-127/Glutathione S-transferase, N-terminal domain containing protein, expressed [Oryza sativa Japonica Group]
LOC_Os04g06520	684	8	9	3	54	22	34	1.23677	2.5916	up	6.62e-06	0.000285484	-	-	-	-	gi|125589277|gb|EAZ29627.1|/3.76369e-115/hypothetical protein OsJ_13694 [Oryza sativa Japonica Group]
LOC_Os04g52550	3330	15	4	14	88	29	59	1.87959	2.5911	up	1.14e-06	6.28e-05	-	-	GO:0003676//nucleic acid binding	GO:0031047//gene silencing by RNA	gi|75144522|sp|Q7XTS3.2|AGO3_ORYSJ/0/RecName: Full=Protein argonaute 3; Short=OsAGO3
LOC_Os10g27990	2370	7	3	7	29	27	37	1.00526	2.58927	up	1.27e-06	6.88e-05	-	GO:0000145//exocyst	-	GO:0006904//vesicle docking involved in exocytosis	gi|113639208|dbj|BAF26513.1|/0/Os10g0415200 [Oryza sativa Japonica Group]
LOC_Os03g14050	999	38	33	67	170	240	332	3.89338	2.58882	up	1.18e-13	4.06e-11	-	GO:0016023//cytoplasmic, membrane-bounded vesicle	-	-	gi|113548004|dbj|BAF11447.1|;gi|937908301|dbj|BAS83221.1|/8.97839e-163;3.55534e-143/Os03g0244200 [Oryza sativa Japonica Group];Os03g0244200, partial [Oryza sativa Japonica Group]
LOC_Os06g46920	1104	18	11	28	138	48	116	2.63537	2.58555	up	3.61e-08	3.3e-06	ko00941//Flavonoid biosynthesis;ko01100//Metabolic pathways;ko01110//Biosynthesis of secondary metabolites	-	GO:0050662//coenzyme binding;GO:0003824//catalytic activity	-	gi|113596426|dbj|BAF20300.1|/0/Os06g0683100 [Oryza sativa Japonica Group]
LOC_Os05g39720	1719	17	15	21	35	84	167	2.54532	2.58547	up	5.29e-07	3.3e-05	ko04626//Plant-pathogen interaction	GO:0009536//plastid	-	-	gi|46394394|tpg|DAA05135.1|/0/TPA_inf: WRKY transcription factor 70 [Oryza sativa (indica cultivar-group)] [Oryza sativa Indica Group]
LOC_Os02g38000	4368	10	3	5	12.01	22	63	1.06811	2.58083	up	0.000276114	0.00617825	ko00900//Terpenoid backbone biosynthesis;ko00908//Zeatin biosynthesis;ko01100//Metabolic pathways;ko03008//Ribosome biogenesis in eukaryotes;ko01110//Biosynthesis of secondary metabolites;ko03018//RNA degradation	-	GO:0003677//DNA binding	GO:0006310//DNA recombination	gi|255674783|dbj|BAH92311.1|/0/Os03g0680566 [Oryza sativa Japonica Group]
LOC_Os01g03870	1902	15	10	7	41	57	76	1.85088	2.5806	up	8.52e-09	9.23e-07	-	GO:0022625//cytosolic large ribosomal subunit;GO:0016020//membrane	GO:0003735//structural constituent of ribosome;GO:0003723//RNA binding	GO:0042254//ribosome biogenesis;GO:0006412//translation	gi|113531448|dbj|BAF03831.1|/0/Os01g0129500 [Oryza sativa Japonica Group]
LOC_Os01g66610	2481	2	5	8	14	40	29	0.844564	2.57534	up	4.98e-05	0.00152107	ko05142//Chagas disease (American trypanosomiasis);ko05133//Pertussis;ko05145//Toxoplasmosis;ko04626//Plant-pathogen interaction;ko04075//Plant hormone signal transduction;ko04722//Neurotrophin signaling pathway;ko05162//Measles;ko04620//Toll-like receptor signaling pathway;ko05164//Influenza A;ko05140//Leishmaniasis;ko05152//Tuberculosis;ko04064//NF-kappa B signaling pathway;ko04210//Apoptosis	GO:0016021//integral component of membrane;GO:0009536//plastid;GO:0005886//plasma membrane	GO:0004674//protein serine/threonine kinase activity;GO:0005524//ATP binding	GO:0006468//protein phosphorylation;GO:0048544//recognition of pollen	gi|113534579|dbj|BAF06962.1|/0/Os01g0889900 [Oryza sativa Japonica Group]
LOC_Os03g02140	3318	7.49	0	3.77	14.77	12.09	33.47	0.456085	2.57167	up	0.00164674	0.024884	-	GO:0016023//cytoplasmic, membrane-bounded vesicle	GO:0008270//zinc ion binding;GO:0030598//rRNA N-glycosylase activity	GO:0006952//defense response;GO:0017148//negative regulation of translation	gi|108705814|gb|ABF93609.1|/0/transposon protein, putative, Mutator sub-class [Oryza sativa Japonica Group]
LOC_Os12g32610	627	14	0	16	90	21	44	1.71133	2.56678	up	0.000335813	0.00714223	-	-	-	-	gi|255670343|dbj|BAH95705.1|/2.32296e-14/Os12g0510750 [Oryza sativa Japonica Group]
LOC_Os03g18490	831	6	2	4	26	3	34	0.523711	2.55127	up	0.00346043	0.0426735	-	-	-	-	gi|108707645|gb|ABF95440.1|/3.21189e-105/expressed protein [Oryza sativa Japonica Group]
LOC_Os07g31390	771	4	2	8	16	16	42	0.718118	2.54959	up	0.000230816	0.00532626	-	GO:0005576//extracellular region;GO:0016023//cytoplasmic, membrane-bounded vesicle	-	-	gi|115502172|sp|Q850K7.2|EXLB1_ORYSJ/0/RecName: Full=Expansin-like B1; AltName: Full=Expansin-related 1; AltName: Full=OsEXLB1; AltName: Full=OsEXPR1; AltName: Full=OsaEXPb3.1; Flags: Precursor
LOC_Os11g42200	1773	15	46	21	122	215	110	3.16072	2.54915	up	1.92e-09	2.56e-07	ko01100//Metabolic pathways;ko00053//Ascorbate and aldarate metabolism	GO:0048046//apoplast;GO:0016023//cytoplasmic, membrane-bounded vesicle	GO:0016722//oxidoreductase activity, oxidizing metal ions;GO:0005507//copper ion binding;GO:0052716//hydroquinone:oxygen oxidoreductase activity	GO:0046274//lignin catabolic process;GO:0055114//oxidation-reduction process	gi|122248731|sp|Q2R0L2.1|LAC19_ORYSJ/0/RecName: Full=Laccase-19; AltName: Full=Benzenediol:oxygen oxidoreductase 19; AltName: Full=Diphenol oxidase 19; AltName: Full=Urishiol oxidase 19; Flags: Precursor
LOC_Os02g50600	1122	22	6	29	115	55	123	2.59496	2.54803	up	1.48e-07	1.13e-05	ko00500//Starch and sucrose metabolism;ko00520//Amino sugar and nucleotide sugar metabolism;ko01110//Biosynthesis of secondary metabolites	GO:0005794//Golgi apparatus;GO:0016023//cytoplasmic, membrane-bounded vesicle	GO:0016757//transferase activity, transferring glycosyl groups	GO:0000271//polysaccharide biosynthetic process	gi|113537598|dbj|BAF09981.1|/0/Os02g0739400 [Oryza sativa Japonica Group]
LOC_Os12g15530	2763	96.93	25	318	766.88	526	925.99	5.48166	2.54483	up	1.79e-05	0.000658567	ko01100//Metabolic pathways;ko00053//Ascorbate and aldarate metabolism	GO:0048046//apoplast;GO:0016023//cytoplasmic, membrane-bounded vesicle	GO:0016722//oxidoreductase activity, oxidizing metal ions;GO:0005507//copper ion binding;GO:0052716//hydroquinone:oxygen oxidoreductase activity	GO:0046274//lignin catabolic process;GO:0055114//oxidation-reduction process	gi|77554492|gb|ABA97288.1|/0/retrotransposon protein, putative, Ty1-copia subclass, expressed [Oryza sativa Japonica Group]
LOC_Os08g04630	1074	32	22	70	244	115	275	3.69187	2.54301	up	4.75e-09	5.59e-07	ko00564//Glycerophospholipid metabolism;ko00260//Glycine, serine and threonine metabolism;ko00061//Fatty acid biosynthesis;ko01120//Microbial metabolism in diverse environments;ko01100//Metabolic pathways;ko00640//Propanoate metabolism;ko02020//Two-component system;ko00620//Pyruvate metabolism;ko00190//Oxidative phosphorylation;ko01110//Biosynthesis of secondary metabolites	GO:0005739//mitochondrion	GO:0016491//oxidoreductase activity;GO:0005509//calcium ion binding	GO:0055114//oxidation-reduction process	gi|937928871|dbj|BAT03787.1|/0/Os08g0141400 [Oryza sativa Japonica Group]
LOC_Os02g02970	1794	5	6	6	21	18	51	0.97634	2.54212	up	4.04e-05	0.00127285	ko03018//RNA degradation	-	GO:0016740//transferase activity	-	gi|255670556|dbj|BAH91508.1|/0/Os02g0122100 [Oryza sativa Japonica Group]
LOC_Os06g37560	2148	11	11	22	36	72	122	2.24462	2.53976	up	2.65e-07	1.88e-05	ko00531//Glycosaminoglycan degradation;ko00052//Galactose metabolism;ko00400//Phenylalanine, tyrosine and tryptophan biosynthesis;ko00051//Fructose and mannose metabolism;ko04142//Lysosome;ko00520//Amino sugar and nucleotide sugar metabolism;ko00604//Glycosphingolipid biosynthesis - ganglio series;ko01100//Metabolic pathways;ko00600//Sphingolipid metabolism;ko03010//Ribosome;ko01110//Biosynthesis…	GO:0016023//cytoplasmic, membrane-bounded vesicle;GO:0005773//vacuole;GO:0048046//apoplast;GO:0005618//cell wall	GO:0004565//beta-galactosidase activity	GO:0005975//carbohydrate metabolic process	gi|75112285|sp|Q5Z7L0.1|BGAL9_ORYSJ/0/RecName: Full=Beta-galactosidase 9; Short=Lactase 9; Flags: Precursor
LOC_Os03g48780	690	28	23.6	58	267.4	129.35	165.85	3.51678	2.53557	up	9.46e-11	1.76e-08	-	GO:0005618//cell wall;GO:0048046//apoplast;GO:0016023//cytoplasmic, membrane-bounded vesicle	GO:0045735//nutrient reservoir activity;GO:0030145//manganese ion binding;GO:0046564//oxalate decarboxylase activity	GO:0033609//oxalate metabolic process	gi|75243632|sp|Q851K1.1|GL36_ORYSJ/1.83554e-150/RecName: Full=Germin-like protein 3-6; Flags: Precursor
LOC_Os12g43140	462	6	0	5	16	17	25	0.4051	2.53525	up	0.000687105	0.0127427	-	-	-	-	gi|77556700|gb|ABA99496.1|/1.55712e-44/expressed protein [Oryza sativa Japonica Group]
LOC_Os01g12660	2523	3	1	2	10	14	9	-0.272493	2.53391	up	0.0022851	0.0315472	-	GO:0016021//integral component of membrane;GO:0005634//nucleus	GO:0005524//ATP binding;GO:0008568//microtubule-severing ATPase activity	GO:0031122//cytoplasmic microtubule organization	gi|113531995|dbj|BAF04378.1|/0/Os01g0226400 [Oryza sativa Japonica Group]
LOC_Os10g34930	690	116	81	189	1066	463	437	5.30966	2.53014	up	2.04e-10	3.62e-08	-	GO:0016023//cytoplasmic, membrane-bounded vesicle	-	-	gi|113639535|dbj|BAF26840.1|/2.14344e-131/Os10g0491000 [Oryza sativa Japonica Group]
LOC_Os11g10520	1143	6	30	17	45	197	49	2.53672	2.53007	up	3.87e-05	0.00122618	ko00980//Metabolism of xenobiotics by cytochrome P450;ko00260//Glycine, serine and threonine metabolism;ko00071//Fatty acid metabolism;ko00910//Nitrogen metabolism;ko00051//Fructose and mannose metabolism;ko01120//Microbial metabolism in diverse environments;ko01100//Metabolic pathways;ko00626//Naphthalene degradation;ko00830//Retinol metabolism;ko00040//Pentose and glucuronate interconversions;k…	GO:0005737//cytoplasm	GO:0008270//zinc ion binding;GO:0016491//oxidoreductase activity;GO:0004022//alcohol dehydrogenase (NAD) activity	GO:0055114//oxidation-reduction process	gi|108864137|gb|ABG22414.1|;gi|148762354|dbj|BAF63879.1|/0;0/Alcohol dehydrogenase 2, putative, expressed [Oryza sativa Japonica Group];alcohol dehydrogenase 3 [Oryza sativa Japonica Group]
LOC_Os11g45690	5919	4.14	4.12	0	17.42	7.7	19.37	0.0885253	2.52771	up	0.00383576	0.0462316	ko03440//Homologous recombination;ko00240//Pyrimidine metabolism;ko01100//Metabolic pathways;ko03460//Fanconi anemia pathway;ko02020//Two-component system;ko02010//ABC transporters;ko00670//One carbon pool by folate	-	GO:0004523//RNA-DNA hybrid ribonuclease activity;GO:0003676//nucleic acid binding	GO:0090502//RNA phosphodiester bond hydrolysis, endonucleolytic;GO:0015074//DNA integration	gi|77552494|gb|ABA95291.1|/0/transposon protein, putative, unclassified [Oryza sativa Japonica Group]
LOC_Os04g10100	5415	2.22	3.15	2.01	17.39	7.95	14.34	-0.0483739	2.52399	up	0.00231428	0.0318583	ko03440//Homologous recombination;ko00240//Pyrimidine metabolism;ko01100//Metabolic pathways;ko03460//Fanconi anemia pathway;ko02020//Two-component system;ko02010//ABC transporters;ko00670//One carbon pool by folate	GO:0005739//mitochondrion	GO:0003964//RNA-directed DNA polymerase activity;GO:0003677//DNA binding;GO:0003723//RNA binding;GO:0004190//aspartic-type endopeptidase activity;GO:0008270//zinc ion binding	GO:0006278//RNA-dependent DNA biosynthetic process;GO:0006508//proteolysis;GO:0015074//DNA integration;GO:0006310//DNA recombination	gi|21741597|emb|CAD39713.1|/0/OSJNBa0052P16.18 [Oryza sativa Japonica Group]
LOC_Os01g60980	5415	6.93	2	1.15	15.22	15.78	22.4	0.304552	2.52082	up	0.000665286	0.0124342	ko03440//Homologous recombination;ko00240//Pyrimidine metabolism;ko01100//Metabolic pathways;ko03460//Fanconi anemia pathway;ko02020//Two-component system;ko02010//ABC transporters;ko00670//One carbon pool by folate	-	GO:0003676//nucleic acid binding;GO:0004190//aspartic-type endopeptidase activity;GO:0008270//zinc ion binding	GO:0006508//proteolysis;GO:0015074//DNA integration	gi|77555686|gb|ABA98482.1|/0/retrotransposon protein, putative, Ty3-gypsy subclass [Oryza sativa Japonica Group]
LOC_Os08g30020	1375	53	123	225	381	557	1111	5.3667	2.51976	up	1.42e-07	1.09e-05	-	GO:0016020//membrane;GO:0016023//cytoplasmic, membrane-bounded vesicle;GO:0016021//integral component of membrane	-	-	gi|40253412|dbj|BAD05341.1|;gi|215694369|dbj|BAG89362.1|;gi|937930364|dbj|BAT05280.1|/0;0;9.3634e-38/membrane protein-like [Oryza sativa Japonica Group];unnamed protein product [Oryza sativa Japonica Group];Os08g0389700 [Oryza sativa Japonica Group]
LOC_Os06g12640	2037	2	0	4	11	8	13	-0.297269	2.5196	up	0.0041379	0.0486502	-	-	-	-	gi|937922011|dbj|BAS96928.1|/0/Os06g0232700 [Oryza sativa Japonica Group]
LOC_Os06g51060	1050	246	255	405	1823	1307	1492	6.53633	2.51696	up	3.15e-18	2.54e-15	ko00500//Starch and sucrose metabolism;ko00520//Amino sugar and nucleotide sugar metabolism;ko01100//Metabolic pathways;ko01110//Biosynthesis of secondary metabolites	GO:0016023//cytoplasmic, membrane-bounded vesicle	GO:0008843//endochitinase activity;GO:0008061//chitin binding;GO:0016231//beta-N-acetylglucosaminidase activity	GO:0006032//chitin catabolic process;GO:0016998//cell wall macromolecule catabolic process;GO:0050832//defense response to fungus;GO:0000272//polysaccharide catabolic process	gi|1002278483|ref|XP_015643568.1|/0/PREDICTED: chitinase 1 [Oryza sativa Japonica Group]
LOC_Os10g05710	3678	4	6	1	13	22	24.01	0.425479	2.51371	up	0.000612171	0.0115998	ko03013//RNA transport;ko00908//Zeatin biosynthesis;ko01100//Metabolic pathways;ko01110//Biosynthesis of secondary metabolites	GO:0005739//mitochondrion	GO:0003677//DNA binding;GO:0008270//zinc ion binding	GO:0015074//DNA integration;GO:0006310//DNA recombination	gi|15209145|gb|AAK91878.1|AC091665_4/0/Putative copia-type pol polyprotein [Oryza sativa]
LOC_Os10g07480	2733	7	3	2	20	19	24	0.511961	2.51175	up	0.000148247	0.00372092	-	-	-	-	gi|1002303243|ref|XP_015614996.1|/0/PREDICTED: filament-like plant protein 4 [Oryza sativa Japonica Group]
LOC_Os01g42380	4374	453	269	567	2113	1617	2751	7.02867	2.51062	up	1.89e-15	9.81e-13	ko03040//Spliceosome;ko04976//Bile secretion;ko02010//ABC transporters	GO:0005886//plasma membrane;GO:0016021//integral component of membrane	GO:0042626//ATPase activity, coupled to transmembrane movement of substances;GO:0005524//ATP binding	GO:0055085//transmembrane transport	gi|122241165|sp|Q0JLC5.1|AB36G_ORYSJ/0/RecName: Full=ABC transporter G family member 36; Short=OsABCG36; AltName: Full=Pleiotropic drug resistance protein 9; Short=OsPDR9
LOC_Os02g26720	1068	2	0	18	29	20	51	1.12113	2.50889	up	0.00203248	0.0289758	ko00562//Inositol phosphate metabolism;ko01100//Metabolic pathways;ko04070//Phosphatidylinositol signaling system	GO:0005622//intracellular	GO:0052726//inositol-1,3,4-trisphosphate 5-kinase activity;GO:0047325//inositol tetrakisphosphate 1-kinase activity;GO:0005524//ATP binding;GO:0000287//magnesium ion binding;GO:0052725//inositol-1,3,4-trisphosphate 6-kinase activity	GO:0010264//myo-inositol hexakisphosphate biosynthetic process;GO:0016310//phosphorylation;GO:0032957//inositol trisphosphate metabolic process	gi|113536343|dbj|BAF08726.1|/0/Os02g0466400, partial [Oryza sativa Japonica Group]
LOC_Os08g42570	1485	5	0	3	12	14	16	0.0136557	2.50615	up	0.00199507	0.0286317	-	-	-	-	gi|1002292083|ref|XP_015650379.1|/0/PREDICTED: UPF0481 protein At3g47200 [Oryza sativa Japonica Group]
LOC_Os01g63060	981	76	41	93	515	161	368	4.41456	2.50415	up	2.22e-09	2.84e-07	-	GO:0005794//Golgi apparatus;GO:0016021//integral component of membrane	GO:0016740//transferase activity	GO:0006952//defense response;GO:0006665//sphingolipid metabolic process	gi|75103416|sp|Q5N7A7.1|IPCS_ORYSJ/0/RecName: Full=Phosphatidylinositol:ceramide inositolphosphotransferase; AltName: Full=Inositol-phosphorylceramide synthase; Short=IPC synthase; AltName: Full=Protein ENHANCING RPW8-MEDIATED HR-LIKE CELL DEATH 1; AltName: Full=Sphingolipid synthase
LOC_Os12g39110	777	7	5	4	30	26	27	0.867307	2.50016	up	3.78e-06	0.000177257	ko04120//Ubiquitin mediated proteolysis;ko04141//Protein processing in endoplasmic reticulum;ko01100//Metabolic pathways;ko00563//Glycosylphosphatidylinositol(GPI)-anchor biosynthesis	-	GO:0008270//zinc ion binding	-	gi|108862882|gb|ABA99126.2|/2.17626e-157/Zinc finger, C3HC4 type family protein, expressed [Oryza sativa Japonica Group]
LOC_Os08g11310	3657	2.15	3.82	2.97	11.61	8.62	26.53	0.152025	2.49723	up	0.00165445	0.0249809	-	GO:0005739//mitochondrion;GO:0005634//nucleus	GO:0008234//cysteine-type peptidase activity;GO:0003677//DNA binding;GO:0046983//protein dimerization activity	GO:0006355//regulation of transcription, DNA-templated;GO:0006508//proteolysis	gi|62733149|gb|AAX95266.1|/0/transposon protein, putative, CACTA, En/Spm sub-class [Oryza sativa Japonica Group]
LOC_Os07g07990	1128	4	0	20	58	19	41	1.34838	2.49311	up	0.0013617	0.02179	ko04626//Plant-pathogen interaction	GO:0016023//cytoplasmic, membrane-bounded vesicle	GO:0016301//kinase activity	GO:0016310//phosphorylation	gi|1002284784|ref|XP_015646691.1|/0/PREDICTED: leucine-rich repeat extensin-like protein 6 [Oryza sativa Japonica Group]
LOC_Os03g27230	1668	18	63	22	216	121	194	3.44244	2.49133	up	4.82e-08	4.2e-06	ko00400//Phenylalanine, tyrosine and tryptophan biosynthesis;ko01100//Metabolic pathways;ko04122//Sulfur relay system;ko01110//Biosynthesis of secondary metabolites;ko00730//Thiamine metabolism	GO:0009507//chloroplast	GO:0003849//3-deoxy-7-phosphoheptulonate synthase activity	GO:0033587//shikimate biosynthetic process;GO:0009423//chorismate biosynthetic process;GO:0009073//aromatic amino acid family biosynthetic process	gi|1002252288|ref|XP_015630375.1|/0/PREDICTED: phospho-2-dehydro-3-deoxyheptonate aldolase 1, chloroplastic [Oryza sativa Japonica Group]
LOC_Os02g20100	5415	6	2	2	15.93	7.22	28	0.265278	2.48852	up	0.00205814	0.0290891	ko03440//Homologous recombination;ko00240//Pyrimidine metabolism;ko01100//Metabolic pathways;ko03460//Fanconi anemia pathway;ko02020//Two-component system;ko02010//ABC transporters;ko00670//One carbon pool by folate	-	GO:0004523//RNA-DNA hybrid ribonuclease activity;GO:0003676//nucleic acid binding	GO:0090502//RNA phosphodiester bond hydrolysis, endonucleolytic;GO:0015074//DNA integration	gi|77552546|gb|ABA95343.1|/0/retrotransposon protein, putative, Ty3-gypsy subclass [Oryza sativa Japonica Group]
LOC_Os06g45184	495	4	1	17	67	6	34	1.22699	2.48384	up	0.00399861	0.0474782	-	-	-	-	gi|255675268|dbj|BAH92554.1|/1.9679e-22/Os04g0274700 [Oryza sativa Japonica Group]
LOC_Os04g10350	1128	37	31	32	131	161	211	3.3559	2.48072	up	5.14e-15	2.24e-12	ko00941//Flavonoid biosynthesis;ko01100//Metabolic pathways;ko01110//Biosynthesis of secondary metabolites;ko00402//Benzoxazinoid biosynthesis	-	GO:0051213//dioxygenase activity;GO:0046872//metal ion binding	GO:0055114//oxidation-reduction process	gi|38346195|emb|CAD39522.2|/0/OSJNBa0027O01.11 [Oryza sativa Japonica Group]
LOC_Os11g29290	1671	9	6	7	10	48	54	1.25861	2.47245	up	9.35e-05	0.00253296	ko00624//Polycyclic aromatic hydrocarbon degradation;ko00903//Limonene and pinene degradation;ko00073//Cutin, suberine and wax biosynthesis;ko01120//Microbial metabolism in diverse environments;ko01100//Metabolic pathways;ko00627//Aminobenzoate degradation;ko00945//Stilbenoid, diarylheptanoid and gingerol biosynthesis;ko00363//Bisphenol degradation;ko01110//Biosynthesis of secondary metabolites	GO:0016020//membrane;GO:0016023//cytoplasmic, membrane-bounded vesicle	GO:0046872//metal ion binding;GO:0016491//oxidoreductase activity	-	gi|108864395|gb|ABA93683.2|/0/Cytochrome P450 family protein, expressed [Oryza sativa Japonica Group]
LOC_Os08g08350	3846	10.21	0	6.8	31.38	6.11	45.4	0.888079	2.4719	up	0.00390965	0.04664	ko04978//Mineral absorption;ko05166//HTLV-I infection;ko04115//p53 signaling pathway;ko00900//Terpenoid backbone biosynthesis;ko04110//Cell cycle;ko00908//Zeatin biosynthesis;ko05202//Transcriptional misregulation in cancer;ko01100//Metabolic pathways;ko03008//Ribosome biogenesis in eukaryotes;ko04064//NF-kappa B signaling pathway;ko01110//Biosynthesis of secondary metabolites;ko04210//Apoptosis;…	-	GO:0003676//nucleic acid binding	GO:0015074//DNA integration	gi|77550728|gb|ABA93525.1|/0/retrotransposon protein, putative, Ty1-copia subclass [Oryza sativa Japonica Group]
LOC_Os04g55710	1002	76	201	55	352	1192	212	5.10151	2.46632	up	2.28e-05	0.00080052	-	-	GO:0004067//asparaginase activity	-	gi|32488923|emb|CAE04504.1|/0/OSJNBb0059K02.14 [Oryza sativa Japonica Group]
LOC_Os05g13920	3969	8.07	0.93	2.08	15.32	11.53	28.73	0.367163	2.4663	up	0.00192331	0.027856	ko03460//Fanconi anemia pathway	-	GO:0004523//RNA-DNA hybrid ribonuclease activity;GO:0003676//nucleic acid binding	GO:0090502//RNA phosphodiester bond hydrolysis, endonucleolytic;GO:0015074//DNA integration	gi|13486715|dbj|BAB39950.1|/0/putative polyprotein [Oryza sativa Japonica Group]
LOC_Os07g42960	1398	72	220	79	634	581	675	5.25455	2.46463	up	1.61e-09	2.23e-07	ko00400//Phenylalanine, tyrosine and tryptophan biosynthesis;ko01100//Metabolic pathways;ko04122//Sulfur relay system;ko01110//Biosynthesis of secondary metabolites;ko00730//Thiamine metabolism	GO:0009507//chloroplast	GO:0003849//3-deoxy-7-phosphoheptulonate synthase activity	GO:0033587//shikimate biosynthetic process;GO:0009423//chorismate biosynthetic process;GO:0009073//aromatic amino acid family biosynthetic process	gi|113611850|dbj|BAF22228.1|/0/Os07g0622200 [Oryza sativa Japonica Group]
LOC_Os01g43460	2028	211	62	229	1168	647	610	5.6179	2.46164	up	3.15e-09	3.87e-07	-	GO:0005623//cell;GO:0016021//integral component of membrane	GO:0008308//voltage-gated anion channel activity	GO:1903959//regulation of anion transmembrane transport;GO:0006873//cellular ion homeostasis	gi|1002235199|ref|XP_015621820.1|/0/PREDICTED: S-type anion channel SLAH2 isoform X1 [Oryza sativa Japonica Group]
LOC_Os05g50990	1668	2	6	2	9	20	23	0.275039	2.46104	up	0.00198127	0.0284805	ko05020//Prion diseases	-	-	-	gi|48475090|gb|AAT44159.1|/0/unknow protein, contains tetratricopeptide (TPR) domain [Oryza sativa Japonica Group]
LOC_Os03g16920	1962	54	60	50	485	132	187	4.04645	2.45744	up	2.89e-08	2.73e-06	ko03040//Spliceosome;ko05145//Toxoplasmosis;ko05134//Legionellosis;ko05162//Measles;ko05169//Epstein-Barr virus infection;ko04144//Endocytosis;ko04141//Protein processing in endoplasmic reticulum;ko05164//Influenza A;ko04010//MAPK signaling pathway;ko05020//Prion diseases;ko04612//Antigen processing and presentation	-	GO:0005524//ATP binding	-	gi|937908605|dbj|BAS83525.1|/0/Os03g0277300 [Oryza sativa Japonica Group]
LOC_Os08g43120	3975	23	4	75	81	57	340	3.31133	2.45049	up	0.00137966	0.021992	ko03040//Spliceosome;ko04976//Bile secretion;ko02010//ABC transporters	GO:0016021//integral component of membrane	GO:0016887//ATPase activity;GO:0005524//ATP binding	GO:0006810//transport	gi|218201551|gb|EEC83978.1|/0/hypothetical protein OsI_30122 [Oryza sativa Indica Group]
LOC_Os02g46460	1833	28	26	34	56	202	179	3.14527	2.44737	up	1.33e-08	1.37e-06	-	GO:0016021//integral component of membrane	GO:0005215//transporter activity	GO:0006810//transport	gi|113537318|dbj|BAF09701.1|/0/Os02g0689900 [Oryza sativa Japonica Group]
LOC_Os03g61150	444	31	21	25	89	52	230	2.94983	2.44359	up	1.06e-06	5.87e-05	-	-	-	-	gi|108711857|gb|ABF99652.1|;gi|108711859|gb|ABF99654.1|;gi|108711858|gb|ABF99653.1|/3.1538e-88;1.01832e-65;1.01763e-61/expressed protein [Oryza sativa Japonica Group];expressed protein [Oryza sativa Japonica Group];expressed protein [Oryza sativa Japonica Group]
LOC_Os06g11990	3378	39	29	35	157	153	192	3.36079	2.43977	up	5.1e-16	2.96e-13	ko04140//Regulation of autophagy	GO:0005634//nucleus;GO:0005737//cytoplasm	-	-	gi|1002277407|ref|XP_015643045.1|/0/PREDICTED: uncharacterized protein LOC4340531 [Oryza sativa Japonica Group]
LOC_Os04g10160	1599	3	9	7	5	48	43	1.05374	2.43309	up	0.00102498	0.0174092	ko00943//Isoflavonoid biosynthesis;ko00624//Polycyclic aromatic hydrocarbon degradation;ko00903//Limonene and pinene degradation;ko00940//Phenylpropanoid biosynthesis;ko00904//Diterpenoid biosynthesis;ko01120//Microbial metabolism in diverse environments;ko01100//Metabolic pathways;ko00627//Aminobenzoate degradation;ko00945//Stilbenoid, diarylheptanoid and gingerol biosynthesis;ko00363//Bisphenol…	GO:0016021//integral component of membrane	GO:0020037//heme binding;GO:0036209;GO:0005506//iron ion binding	GO:0006952//defense response;GO:0055114//oxidation-reduction process;GO:0051502;GO:0071395//cellular response to jasmonic acid stimulus	gi|205688119|sp|Q7X7X4.2|C99A2_ORYSJ/0/RecName: Full=Cytochrome P450 99A2
LOC_Os07g18240	2100	12	11	16	41	99	53	1.99751	2.43187	up	2.75e-08	2.65e-06	ko05142//Chagas disease (American trypanosomiasis);ko05133//Pertussis;ko05145//Toxoplasmosis;ko04626//Plant-pathogen interaction;ko04075//Plant hormone signal transduction;ko04722//Neurotrophin signaling pathway;ko05162//Measles;ko04620//Toll-like receptor signaling pathway;ko05164//Influenza A;ko05140//Leishmaniasis;ko05152//Tuberculosis;ko04064//NF-kappa B signaling pathway;ko04210//Apoptosis	GO:0016021//integral component of membrane	GO:0030246//carbohydrate binding;GO:0005524//ATP binding;GO:0004674//protein serine/threonine kinase activity	GO:0006468//protein phosphorylation	gi|255677673|dbj|BAH93870.1|/0/Os07g0283125 [Oryza sativa Japonica Group]
LOC_Os07g36544	2580	47	11	53	191	129	206	3.43492	2.43128	up	7.13e-09	7.86e-07	ko05142//Chagas disease (American trypanosomiasis);ko05133//Pertussis;ko05145//Toxoplasmosis;ko04626//Plant-pathogen interaction;ko04722//Neurotrophin signaling pathway;ko05162//Measles;ko04620//Toll-like receptor signaling pathway;ko05164//Influenza A;ko05140//Leishmaniasis;ko05152//Tuberculosis;ko04064//NF-kappa B signaling pathway;ko04210//Apoptosis	GO:0016021//integral component of membrane;GO:0009506//plasmodesma;GO:0016023//cytoplasmic, membrane-bounded vesicle;GO:0005886//plasma membrane	GO:0004674//protein serine/threonine kinase activity;GO:0005524//ATP binding	GO:0006952//defense response;GO:0006468//protein phosphorylation;GO:0048544//recognition of pollen	gi|1002284748|ref|XP_015646672.1|;gi|937927126|dbj|BAT02043.1|/0;0/PREDICTED: receptor-like serine/threonine-protein kinase SD1-8 isoform X2 [Oryza sativa Japonica Group];Os07g0550500 [Oryza sativa Japonica Group]
LOC_Os04g12540	3033	60	42	122	533	244	285	4.44126	2.42972	up	1.49e-09	2.1e-07	-	GO:0016021//integral component of membrane;GO:0016023//cytoplasmic, membrane-bounded vesicle;GO:0005886//plasma membrane	GO:0004674//protein serine/threonine kinase activity;GO:0005524//ATP binding;GO:0030246//carbohydrate binding	GO:0006952//defense response;GO:0006468//protein phosphorylation	gi|530656694|gb|AGT37611.1|/0/G-type lectin receptor kinase [Oryza sativa Indica Group]
LOC_Os03g19290	540	10	12	26	129	41	59	2.26882	2.4257	up	2.56e-06	0.000126052	-	GO:0031305//integral component of mitochondrial inner membrane;GO:0005744//mitochondrial inner membrane presequence translocase complex	GO:0015266//protein channel activity	GO:0030150//protein import into mitochondrial matrix	gi|113548355|dbj|BAF11798.1|/1.85978e-63/Os03g0305600 [Oryza sativa Japonica Group]
LOC_Os01g69830	1239	8	7	14	27	14	97	1.57641	2.42521	up	0.000334442	0.00713376	-	-	-	-	gi|160185554|sp|Q0JGI1.2|SPL2_ORYSJ/0/RecName: Full=Squamosa promoter-binding-like protein 2
LOC_Os10g02314	717	1.98	4.67	5	21.99	15	20.63	0.414908	2.42343	up	0.000351823	0.00742201	-	-	GO:0008233//peptidase activity	GO:0006508//proteolysis	gi|110288535|gb|ABG65887.1|/6.70205e-157/hypothetical protein LOC_Os10g02314 [Oryza sativa Japonica Group]
LOC_Os12g38170	702	32	384	49	880	891	600	5.57831	2.42122	up	0.000448434	0.0090138	-	GO:0016023//cytoplasmic, membrane-bounded vesicle	-	-	gi|113649581|dbj|BAF30093.1|/1.05892e-147/Os12g0569500 [Oryza sativa Japonica Group]
LOC_Os05g45670	1308	10	2	3	29	12	31	0.705434	2.4149	up	0.000546638	0.0106312	ko00230//Purine metabolism;ko04623//Cytosolic DNA-sensing pathway;ko05016//Huntington's disease;ko05169//Epstein-Barr virus infection;ko00240//Pyrimidine metabolism;ko01100//Metabolic pathways;ko03020//RNA polymerase	-	-	-	gi|222632342|gb|EEE64474.1|/0/hypothetical protein OsJ_19324 [Oryza sativa Japonica Group]
LOC_Os01g72520	1563	5	9	4	41	21	26	0.962753	2.41368	up	2.85e-05	0.000963695	ko00564//Glycerophospholipid metabolism;ko00740//Riboflavin metabolism;ko00562//Inositol phosphate metabolism;ko00565//Ether lipid metabolism;ko01120//Microbial metabolism in diverse environments;ko01100//Metabolic pathways;ko00627//Aminobenzoate degradation	-	GO:0016788//hydrolase activity, acting on ester bonds	GO:0008152//metabolic process	gi|113534966|dbj|BAF07349.1|/0/Os01g0955000 [Oryza sativa Japonica Group]
LOC_Os08g33740	1785	2	16	6	9	62	50	1.36413	2.41087	up	0.00100376	0.0171247	-	GO:0016021//integral component of membrane	-	-	gi|75225129|sp|Q6YWK8.1|CSLAB_ORYSJ/0/RecName: Full=Probable mannan synthase 11; AltName: Full=Cellulose synthase-like protein A11; AltName: Full=OsCslA11
LOC_Os03g46060	669	149	56	250	1144	577	388	5.42526	2.40366	up	3.26e-07	2.22e-05	-	GO:0016023//cytoplasmic, membrane-bounded vesicle	-	-	gi|113549303|dbj|BAF12746.1|/1.8291e-124/Os03g0663400 [Oryza sativa Japonica Group]
LOC_Os12g08700	396	2	3	8	19	21	23	0.525046	2.40292	up	0.000258218	0.00581854	-	-	-	-	gi|77553219|gb|ABA96015.1|/4.49644e-64/expressed protein [Oryza sativa Japonica Group]
LOC_Os10g09240	411	10	4	7	46	25	29	1.13208	2.39905	up	5.19e-06	0.000233759	-	-	-	-	gi|31430451|gb|AAP52360.1|/5.57441e-36/expressed protein [Oryza sativa Japonica Group]
LOC_Os08g41780	1317	6	3	5	16	28	24	0.617485	2.39848	up	8e-05	0.00224149	-	-	GO:0016788//hydrolase activity, acting on ester bonds	GO:0016042//lipid catabolic process	gi|113624290|dbj|BAF24235.1|/0/Os08g0529800 [Oryza sativa Japonica Group]
LOC_Os06g05320	1458	2	1	9	25	13	19	0.407116	2.39628	up	0.00195536	0.0281924	ko00330//Arginine and proline metabolism	-	GO:0016747//transferase activity, transferring acyl groups other than amino-acyl groups	-	gi|113594829|dbj|BAF18703.1|/0/Os06g0145600 [Oryza sativa Japonica Group]
LOC_Os07g18154	2535	12.42	10.99	16.26	49.33	56.57	82.29	1.98881	2.39471	up	6.2e-09	7.03e-07	ko01100//Metabolic pathways;ko00380//Tryptophan metabolism;ko00906//Carotenoid biosynthesis;ko01110//Biosynthesis of secondary metabolites	GO:0005829//cytosol	GO:0051537//2 iron, 2 sulfur cluster binding;GO:0009055//electron carrier activity;GO:0016614//oxidoreductase activity, acting on CH-OH group of donors;GO:0016903//oxidoreductase activity, acting on the aldehyde or oxo group of donors;GO:0004854//xanthine dehydrogenase activity;GO:0050660//flavin adenine dinucleotide binding;GO:0005506//iron ion binding	GO:0055114//oxidation-reduction process;GO:0009115//xanthine catabolic process	gi|1002280598|ref|XP_015644602.1|;gi|75289690|sp|Q69R21.1|ALDO4_ORYSJ/0;0/PREDICTED: probable aldehyde oxidase 4 isoform X2 [Oryza sativa Japonica Group];RecName: Full=Probable aldehyde oxidase 4; Short=AO-4
LOC_Os01g16160	4917	8.52	3.85	3.18	33.55	6.07	33.76	0.739398	2.3935	up	0.00163356	0.0247635	ko05166//HTLV-I infection;ko04115//p53 signaling pathway;ko00900//Terpenoid backbone biosynthesis;ko04110//Cell cycle;ko00908//Zeatin biosynthesis;ko05202//Transcriptional misregulation in cancer;ko01100//Metabolic pathways;ko03008//Ribosome biogenesis in eukaryotes;ko04064//NF-kappa B signaling pathway;ko01110//Biosynthesis of secondary metabolites;ko04210//Apoptosis;ko03018//RNA degradation	-	GO:0003676//nucleic acid binding;GO:0008270//zinc ion binding	GO:0015074//DNA integration	gi|23928439|gb|AAN40025.1|/0/putative gag-pol polyprotein [Zea mays]
LOC_Os02g37890	1329	7.8	1	3	20.27	11.01	24.5	0.383744	2.38471	up	0.00186539	0.0273896	ko00904//Diterpenoid biosynthesis;ko01100//Metabolic pathways;ko01110//Biosynthesis of secondary metabolites	GO:0016021//integral component of membrane	-	GO:0009061//anaerobic respiration;GO:0018171//peptidyl-cysteine oxidation;GO:0070483//detection of hypoxia	gi|32488770|emb|CAE04323.1|/2.24741e-174/OSJNBb0016D16.14 [Oryza sativa Japonica Group]
LOC_Os01g31370	1611	8	4	15	43	31	52	1.44526	2.38241	up	2.22e-06	0.000112532	-	GO:0005576//extracellular region;GO:0016021//integral component of membrane	GO:0016757//transferase activity, transferring glycosyl groups	-	gi|55297629|dbj|BAD69004.1|/0/HGA1-like protein [Oryza sativa Japonica Group]
LOC_Os07g38430	1017	4	5	9	29	22	34	0.920022	2.37853	up	1.61e-05	0.00060536	-	-	GO:0016740//transferase activity	-	gi|113611591|dbj|BAF21969.1|/0/Os07g0572000 [Oryza sativa Japonica Group]
LOC_Os03g08940	555	4	3	9	23	16	36	0.760307	2.37718	up	0.000161966	0.00396156	-	-	-	-	-
LOC_Os05g39250	504	32	13	43	175	62	163	3.06498	2.3755	up	3.44e-07	2.29e-05	-	GO:0016021//integral component of membrane	-	-	gi|255676433|dbj|BAF17716.2|/5.30719e-119/Os05g0468800 [Oryza sativa Japonica Group]
LOC_Os03g25790	1437	43	28	56	357	91	131	3.59124	2.37331	up	5.32e-07	3.3e-05	ko04075//Plant hormone signal transduction	GO:0046658//anchored component of plasma membrane	GO:0004553//hydrolase activity, hydrolyzing O-glycosyl compounds;GO:0030247//polysaccharide binding	GO:0005975//carbohydrate metabolic process	gi|108708413|gb|ABF96208.1|/0/Glycosyl hydrolases family 17 protein, expressed [Oryza sativa Japonica Group]
LOC_Os01g65780	1868	64	41	95	371	174	366	4.23541	2.37205	up	2.09e-10	3.64e-08	-	GO:0016021//integral component of membrane	GO:0016757//transferase activity, transferring glycosyl groups	-	gi|56784626|dbj|BAD81673.1|/0/glycogenin-like protein [Oryza sativa Japonica Group]
LOC_Os01g51980	1458	12	8	3	27	64	20	1.24959	2.37099	up	7.89e-05	0.00222477	ko03008//Ribosome biogenesis in eukaryotes	GO:0016021//integral component of membrane;GO:0016023//cytoplasmic, membrane-bounded vesicle	GO:0016846//carbon-sulfur lyase activity	-	gi|125527502|gb|EAY75616.1|/0/hypothetical protein OsI_03520 [Oryza sativa Indica Group]
LOC_Os10g04380	1512	5	4	7	21	31	24	0.764812	2.36963	up	2.12e-05	0.00075717	ko00230//Purine metabolism;ko04623//Cytosolic DNA-sensing pathway;ko05016//Huntington's disease;ko05169//Epstein-Barr virus infection;ko00240//Pyrimidine metabolism;ko01100//Metabolic pathways;ko03020//RNA polymerase	-	GO:0005524//ATP binding	GO:0006915//apoptotic process	gi|937934869|dbj|BAT09783.1|/0/Os10g0133166 [Oryza sativa Japonica Group]
LOC_Os03g53800	1878	239	146	243	1119	738	1016	5.87806	2.36759	up	5.55e-16	3.13e-13	ko00500//Starch and sucrose metabolism;ko02030//Bacterial chemotaxis;ko00940//Phenylpropanoid biosynthesis;ko00460//Cyanoamino acid metabolism;ko01100//Metabolic pathways;ko02020//Two-component system;ko01110//Biosynthesis of secondary metabolites	GO:0016023//cytoplasmic, membrane-bounded vesicle	GO:0008422//beta-glucosidase activity	GO:0009251//glucan catabolic process	gi|108711087|gb|ABF98882.1|/0/Glycosyl hydrolase family 3 N terminal domain containing protein, expressed [Oryza sativa Japonica Group]
LOC_Os04g41380	2757	4	4	5	14	15	32	0.496915	2.3587	up	0.00053852	0.0104839	ko00230//Purine metabolism;ko04623//Cytosolic DNA-sensing pathway;ko04626//Plant-pathogen interaction;ko05016//Huntington's disease;ko05169//Epstein-Barr virus infection;ko00240//Pyrimidine metabolism;ko01100//Metabolic pathways;ko03020//RNA polymerase	-	-	-	gi|32483317|emb|CAE02492.1|/0/OSJNBa0076N16.15 [Oryza sativa Japonica Group]
LOC_Os01g03330	780	36	64	25	76	174	337	3.59801	2.35863	up	2.59e-06	0.000127089	-	GO:0005576//extracellular region;GO:0016023//cytoplasmic, membrane-bounded vesicle	GO:0004867//serine-type endopeptidase inhibitor activity	GO:0010951//negative regulation of endopeptidase activity	gi|113531418|dbj|BAF03801.1|/2.52634e-162/Os01g0124100 [Oryza sativa Japonica Group]
LOC_Os04g33200	1344	11	5	2	54	11	18	0.902229	2.35502	up	0.00167536	0.025237	ko00531//Glycosaminoglycan degradation;ko04142//Lysosome;ko01100//Metabolic pathways	GO:0016021//integral component of membrane	-	-	gi|113564277|dbj|BAF14620.1|/0/Os04g0404900 [Oryza sativa Japonica Group]
LOC_Os04g58504	2136	1	3	5	14	13	15.71	0.0561289	2.3537	up	0.00174802	0.026106	-	GO:0016021//integral component of membrane	-	-	gi|32488632|emb|CAE03425.1|/0/OSJNBa0032F06.8 [Oryza sativa Japonica Group]
LOC_Os08g02450	2478	7	1	3	27	11	13	0.276384	2.35193	up	0.00284378	0.036722	-	GO:0012505//endomembrane system;GO:0016021//integral component of membrane	GO:0005451//monovalent cation:proton antiporter activity	GO:1902600//hydrogen ion transmembrane transport;GO:0006885//regulation of pH	gi|113622833|dbj|BAF22778.1|/0/Os08g0117800 [Oryza sativa Japonica Group]
LOC_Os03g49600	1479	24	29	49	238	106	117	3.26346	2.34314	up	7.03e-09	7.84e-07	ko00500//Starch and sucrose metabolism;ko00940//Phenylpropanoid biosynthesis;ko00460//Cyanoamino acid metabolism;ko01100//Metabolic pathways;ko01110//Biosynthesis of secondary metabolites	GO:0005576//extracellular region;GO:0016023//cytoplasmic, membrane-bounded vesicle	GO:0050224;GO:0047701;GO:0080079//cellobiose glucosidase activity;GO:0033907;GO:0047668//amygdalin beta-glucosidase activity;GO:0004567//beta-mannosidase activity;GO:0042973//glucan endo-1,3-beta-D-glucosidase activity;GO:0004565//beta-galactosidase activity;GO:0042803//protein homodimerization activity;GO:0080083//beta-gentiobiose beta-glucosidase activity;GO:0102483//scopolin beta-glucosidase a…	GO:0005975//carbohydrate metabolic process;GO:1901657//glycosyl compound metabolic process	gi|108710631|gb|ABF98426.1|;gi|108710630|gb|ABF98425.1|;gi|108710629|gb|ABF98424.1|;gi|75226342|sp|Q75I93.1|BGL07_ORYSJ/0;0;0;0/Glycosyl hydrolase family 1 protein, expressed [Oryza sativa Japonica Group];Glycosyl hydrolase family 1 protein, expressed [Oryza sativa Japonica Group];Glycosyl hydrolase family 1 protein, expressed [Oryza sativa Japonica Group];RecName: Full=Beta-glucosidase 7; Short=…
LOC_Os03g08320	630	58	8	120	224	186	406	4.07883	2.34133	up	8.15e-05	0.00227383	ko04626//Plant-pathogen interaction;ko04075//Plant hormone signal transduction	GO:0005634//nucleus	GO:0003714//transcription corepressor activity	GO:1903507//negative regulation of nucleic acid-templated transcription;GO:2000022//regulation of jasmonic acid mediated signaling pathway;GO:0009611//response to wounding;GO:0031347//regulation of defense response;GO:0006351//transcription, DNA-templated	gi|75150198|sp|Q8GRS2.1|TI11C_ORYSJ/3.02982e-111/RecName: Full=Protein TIFY 11c; Short=OsTIFY11c; AltName: Full=Jasmonate ZIM domain-containing protein 11; Short=OsJAZ11; AltName: Full=OsJAZ2
LOC_Os05g07810	612	4	6	1	19	15	18	0.297999	2.34087	up	0.00156149	0.0240894	-	-	-	-	gi|937917561|dbj|BAS92479.1|/9.42527e-121/Os05g0170200 [Oryza sativa Japonica Group]
LOC_Os01g38610	1401	2	7	10	34	22	31	0.958679	2.33138	up	5.08e-05	0.00153885	-	-	-	-	gi|255673375|dbj|BAF05278.2|/1.0869e-133/Os01g0566800, partial [Oryza sativa Japonica Group]
LOC_Os07g04190	3072	5	2	2	12	15	15	0.037114	2.32701	up	0.00176123	0.0262419	ko00903//Limonene and pinene degradation;ko00642//Ethylbenzene degradation;ko00362//Benzoate degradation;ko00240//Pyrimidine metabolism;ko00051//Fructose and mannose metabolism;ko01120//Microbial metabolism in diverse environments;ko01100//Metabolic pathways;ko00627//Aminobenzoate degradation;ko00350//Tyrosine metabolism	GO:0016021//integral component of membrane;GO:0005886//plasma membrane	GO:0004672//protein kinase activity;GO:0033612//receptor serine/threonine kinase binding;GO:0043621//protein self-association;GO:0005524//ATP binding	GO:0048437//floral organ development;GO:0006468//protein phosphorylation;GO:0010075//regulation of meristem growth;GO:0048229//gametophyte development	gi|937925041|dbj|BAS99957.1|/0/Os07g0134200 [Oryza sativa Japonica Group]
LOC_Os08g02030	1407	84	20	176	427	283	508	4.65467	2.32535	up	5.68e-06	0.000250596	ko00941//Flavonoid biosynthesis;ko00940//Phenylpropanoid biosynthesis;ko00945//Stilbenoid, diarylheptanoid and gingerol biosynthesis;ko01110//Biosynthesis of secondary metabolites	-	-	-	gi|1002290979|ref|XP_015649827.1|/0/PREDICTED: uncharacterized acetyltransferase At3g50280 [Oryza sativa Japonica Group]
LOC_Os02g53520	3024	9	11	14	36	57	62	1.72677	2.32516	up	8.03e-08	6.49e-06	-	GO:0005871//kinesin complex;GO:0005874//microtubule	GO:0008017//microtubule binding;GO:0016887//ATPase activity;GO:0005524//ATP binding;GO:0003777//microtubule motor activity	GO:0007018//microtubule-based movement	gi|1002246193|ref|XP_015627269.1|/0/PREDICTED: kinesin-related protein 4 [Oryza sativa Japonica Group]
LOC_Os08g27170	1563	4	6	14	66	14	27	1.2446	2.32357	up	0.000434613	0.00881919	ko04916//Melanogenesis;ko04020//Calcium signaling pathway;ko04270//Vascular smooth muscle contraction;ko05133//Pertussis;ko04744//Phototransduction;ko04626//Plant-pathogen interaction;ko04910//Insulin signaling pathway;ko04970//Salivary secretion;ko04912//GnRH signaling pathway;ko04722//Neurotrophin signaling pathway;ko05034//Alcoholism;ko05031//Amphetamine addiction;ko04745//Phototransduction - …	-	GO:0005516//calmodulin binding	GO:0006950//response to stress	gi|1002289249|ref|XP_015648922.1|/0/PREDICTED: protein SAR DEFICIENT 1-like [Oryza sativa Japonica Group]
LOC_Os11g34460	1669	11	7	21	74	26	72	1.89064	2.31886	up	8.91e-06	0.000371596	ko04712//Circadian rhythm - plant	GO:0016021//integral component of membrane;GO:0005634//nucleus	GO:0009881//photoreceptor activity;GO:0001047//core promoter binding	GO:0016567//protein ubiquitination;GO:0007165//signal transduction;GO:0018298//protein-chromophore linkage;GO:0048511//rhythmic process;GO:0009911//positive regulation of flower development;GO:0006355//regulation of transcription, DNA-templated;GO:0007623//circadian rhythm;GO:0009637//response to blue light	gi|110832734|sp|Q2R2W1.2|ADO3_ORYSJ;gi|108864482|gb|ABG22521.1|/0;0/RecName: Full=Ada;Ada
LOC_Os06g08110	1704	60	21	81	384	120	200	3.87803	2.31694	up	9.94e-07	5.58e-05	-	GO:0016021//integral component of membrane;GO:0005739//mitochondrion	-	GO:0055085//transmembrane transport	gi|24413989|dbj|BAC22240.1|/0/nodulin-like protein [Oryza sativa Japonica Group]
LOC_Os05g15770	894	418	431	499	1314	1490	3182	6.94547	2.31453	up	1.58e-11	3.45e-09	ko00500//Starch and sucrose metabolism;ko00520//Amino sugar and nucleotide sugar metabolism;ko01100//Metabolic pathways;ko01110//Biosynthesis of secondary metabolites	GO:0005576//extracellular region;GO:0016023//cytoplasmic, membrane-bounded vesicle	GO:0004568//chitinase activity;GO:0008061//chitin binding	GO:0005975//carbohydrate metabolic process;GO:0006032//chitin catabolic process;GO:0006952//defense response	gi|255676171|dbj|BAF16931.2|/0/Os05g0247100 [Oryza sativa Japonica Group]
LOC_Os05g31760	1119	5	15	2	19	51	33	1.16718	2.30726	up	0.000383668	0.00794516	-	-	GO:0005509//calcium ion binding;GO:0005544//calcium-dependent phospholipid binding	-	gi|113578959|dbj|BAF17322.1|/0/Os05g0382900 [Oryza sativa Japonica Group]
LOC_Os02g47840	534	23	7	23	101	43	87	2.29942	2.30441	up	9.76e-07	5.51e-05	-	-	-	GO:0006950//response to stress	gi|41053162|dbj|BAD08104.1|/3.6307e-130/ethylene-responsive protein-like [Oryza sativa Japonica Group]
LOC_Os11g03130	852	2	2	5	12	12	17	0.0155214	2.30251	up	0.00245926	0.0332104	-	GO:0016021//integral component of membrane	GO:0015292//uniporter activity	GO:0055085//transmembrane transport	gi|937937558|dbj|BAT12471.1|/6.04823e-141/Os11g0124500 [Oryza sativa Japonica Group]
LOC_Os10g06630	546	3	3	13	26	31	28	0.923597	2.30234	up	5.98e-05	0.0017533	-	GO:0016020//membrane	GO:0003755//peptidyl-prolyl cis-trans isomerase activity	GO:0006457//protein folding;GO:0000413//protein peptidyl-prolyl isomerization	gi|113638797|dbj|BAF26102.1|/2.59935e-119/Os10g0154700 [Oryza sativa Japonica Group]
LOC_Os03g18890	1107	7	5	3	36	9	22	0.632707	2.30028	up	0.00109605	0.0184206	ko00500//Starch and sucrose metabolism;ko00520//Amino sugar and nucleotide sugar metabolism;ko01110//Biosynthesis of secondary metabolites	GO:0005794//Golgi apparatus;GO:0016023//cytoplasmic, membrane-bounded vesicle	GO:0016757//transferase activity, transferring glycosyl groups	GO:0000271//polysaccharide biosynthetic process	gi|113548332|dbj|BAF11775.1|/0/Os03g0300900 [Oryza sativa Japonica Group]
LOC_Os01g28450	495	18	143	49	229	551	203	4.31206	2.29788	up	8.02e-05	0.0022432	ko04626//Plant-pathogen interaction;ko04075//Plant hormone signal transduction	GO:0005576//extracellular region;GO:0016023//cytoplasmic, membrane-bounded vesicle	-	GO:0006952//defense response;GO:0009607//response to biotic stimulus	gi|1888551|gb|AAB49685.1|/1.49414e-106/pathogenesis-related protein class 1 [Oryza sativa Indica Group]
LOC_Os06g10210	1287	12	37	40	141	97	153	3.0381	2.28513	up	2.72e-08	2.64e-06	-	-	GO:0016872//intramolecular lyase activity	-	gi|113595126|dbj|BAF19000.1|/0/Os06g0203600 [Oryza sativa Japonica Group]
LOC_Os10g38160	699	8.75	5.19	8	20.31	38	39.23	1.1063	2.28443	up	7.55e-06	0.000319575	ko00980//Metabolism of xenobiotics by cytochrome P450;ko05200//Pathways in cancer;ko00480//Glutathione metabolism;ko00982//Drug metabolism - cytochrome P450;ko05215//Prostate cancer	GO:0005737//cytoplasm	GO:0004364//glutathione transferase activity	GO:0009407//toxin catabolic process;GO:0006749//glutathione metabolic process	gi|113639724|dbj|BAF27029.1|/9.78074e-170/Os10g0525600 [Oryza sativa Japonica Group]
LOC_Os08g34240	1356	11	22	18	100	85	42	2.26056	2.28357	up	2.2e-07	1.59e-05	ko00903//Limonene and pinene degradation;ko00642//Ethylbenzene degradation;ko00362//Benzoate degradation;ko04150//mTOR signaling pathway;ko04910//Insulin signaling pathway;ko00240//Pyrimidine metabolism;ko00051//Fructose and mannose metabolism;ko01120//Microbial metabolism in diverse environments;ko01100//Metabolic pathways;ko00627//Aminobenzoate degradation;ko04140//Regulation of autophagy;ko003…	-	GO:0004674//protein serine/threonine kinase activity;GO:0005524//ATP binding	GO:0010540//basipetal auxin transport;GO:0006468//protein phosphorylation;GO:0007275//multicellular organism development;GO:0042538//hyperosmotic salinity response;GO:0007165//signal transduction	gi|75325520|sp|Q6Z9F4.1|CIPK6_ORYSJ/0/RecName: Full=CBL-interacting protein kinase 6; AltName: Full=OsCIPK06
LOC_Os03g11830	3168	14.69	0	9.25	28.6	24.23	50.32	1.19381	2.28201	up	0.000632193	0.0119086	-	-	GO:0008270//zinc ion binding	-	gi|108706867|gb|ABF94662.1|/0/Transposable element protein, putative, MuDR [Oryza sativa Japonica Group]
LOC_Os03g21510	1905	2	2	9	20	15	22	0.423233	2.27387	up	0.00152732	0.0237726	ko04075//Plant hormone signal transduction	GO:0016021//integral component of membrane;GO:0016023//cytoplasmic, membrane-bounded vesicle	GO:0004672//protein kinase activity;GO:0005524//ATP binding	GO:0006468//protein phosphorylation	gi|108707983|gb|ABF95778.1|/0/Protein kinase domain containing protein, expressed [Oryza sativa Japonica Group]
LOC_Os07g47100	1608	49	58	54	289	135	270	3.86323	2.26974	up	1.02e-10	1.89e-08	-	GO:0016021//integral component of membrane;GO:0005774//vacuolar membrane;GO:0005886//plasma membrane	GO:0015385//sodium:proton antiporter activity	GO:1902600//hydrogen ion transmembrane transport;GO:0055075//potassium ion homeostasis;GO:0009651//response to salt stress;GO:0035725//sodium ion transmembrane transport;GO:0006885//regulation of pH	gi|255678050|dbj|BAF22485.2|;gi|5731737|dbj|BAA83337.1|/0;0/Os07g0666900, partial [Oryza sativa Japonica Group];OsNHX1 [Oryza sativa Japonica Group]
LOC_Os10g37660	1692	50	29	72	259	136	246	3.74753	2.2674	up	8.99e-10	1.34e-07	ko00500//Starch and sucrose metabolism	GO:0005886//plasma membrane	GO:0004555//alpha,alpha-trehalase activity	GO:0005993//trehalose catabolic process	gi|75263102|sp|Q9FWC1.1|TRE_ORYSJ/0/RecName: Full=Probable trehalase; AltName: Full=Alpha,alpha-trehalase; AltName: Full=Alpha,alpha-trehalose glucohydrolase
LOC_Os04g48850	1452	17	10	17	45	46	98	2.02155	2.26403	up	7.36e-07	4.32e-05	ko00270//Cysteine and methionine metabolism;ko01100//Metabolic pathways;ko01110//Biosynthesis of secondary metabolites	-	GO:0030170//pyridoxal phosphate binding;GO:0003824//catalytic activity	GO:0009058//biosynthetic process	gi|32488497|emb|CAE03249.1|/0/OSJNBa0011J08.4 [Oryza sativa Japonica Group]
LOC_Os04g59540	4146	18	13	46	186	78	62	2.78516	2.26216	up	8.36e-06	0.000351507	ko04145//Phagosome;ko00562//Inositol phosphate metabolism;ko04810//Regulation of actin cytoskeleton;ko04070//Phosphatidylinositol signaling system	-	GO:0005524//ATP binding;GO:0016307//phosphatidylinositol phosphate kinase activity	GO:0046854//phosphatidylinositol phosphorylation	gi|113565934|dbj|BAF16277.1|/0/Os04g0691900 [Oryza sativa Japonica Group]
LOC_Os07g35480	1662	11	7	18	25	44	85	1.73652	2.25652	up	1.95e-05	0.000705247	ko04075//Plant hormone signal transduction	GO:0046658//anchored component of plasma membrane;GO:0016023//cytoplasmic, membrane-bounded vesicle	GO:0004553//hydrolase activity, hydrolyzing O-glycosyl compounds;GO:0030247//polysaccharide binding	GO:0005975//carbohydrate metabolic process	gi|113611419|dbj|BAF21797.1|/0/Os07g0539100 [Oryza sativa Japonica Group]
LOC_Os09g21120	2139	3	2	31	67	29	54	1.70971	2.25573	up	0.00188957	0.0276317	ko04120//Ubiquitin mediated proteolysis;ko04141//Protein processing in endoplasmic reticulum	-	GO:0003824//catalytic activity	-	gi|255678852|dbj|BAF24963.2|/0/Os09g0378700 [Oryza sativa Japonica Group]
LOC_Os05g32110	1373	11	13	13	51	36	72	1.78676	2.25331	up	4.15e-07	2.67e-05	-	GO:0005886//plasma membrane;GO:0031225//anchored component of membrane;GO:0016021//integral component of membrane;GO:0016023//cytoplasmic, membrane-bounded vesicle	-	GO:0010215//cellulose microfibril organization;GO:0016049//cell growth	gi|75113832|sp|Q60E70.1|COBL3_ORYSJ;gi|125552171|gb|EAY97880.1|/0;0/RecName: Full=COBRA-like protein 3; AltName: Full=Protein BRITTLE CULM1-like 4; Flags: Precursor;hypothetical protein OsI_19799 [Oryza sativa Indica Group]
LOC_Os01g01030	1782	6	2	4	15	15	22	0.312026	2.24474	up	0.00107771	0.0181921	ko01100//Metabolic pathways;ko00053//Ascorbate and aldarate metabolism	GO:0009505//plant-type cell wall;GO:0009506//plasmodesma;GO:0016021//integral component of membrane;GO:0005739//mitochondrion	GO:0016722//oxidoreductase activity, oxidizing metal ions;GO:0005507//copper ion binding	GO:0055114//oxidation-reduction process	gi|1002232960|ref|XP_015619189.1|/0/PREDICTED: monocopper oxidase-like protein SKU5 isoform X1 [Oryza sativa Japonica Group]
LOC_Os12g29400	897	40	17	72	200	68	263	3.49313	2.24417	up	1.07e-05	0.000432658	-	-	-	GO:0098755//maintenance of seed dormancy by absisic acid;GO:0009793//embryo development ending in seed dormancy;GO:0010029//regulation of seed germination	gi|1002310335|ref|XP_015618529.1|/4.39601e-170/PREDICTED: GEM-like protein 5 [Oryza sativa Japonica Group]
LOC_Os01g70190	1248	2	11	2	17	18	31	0.614964	2.23262	up	0.00265898	0.0350196	-	GO:0000139//Golgi membrane;GO:0016021//integral component of membrane;GO:0016023//cytoplasmic, membrane-bounded vesicle	GO:0016757//transferase activity, transferring glycosyl groups	GO:0071555//cell wall organization	gi|75159222|sp|Q8S1X8.1|GT14_ORYSJ/0/RecName: Full=Probable glucuronosyltransferase Os01g0926600
LOC_Os01g49380	1164	12	12	10	67	24	52	1.65107	2.22666	up	8.28e-06	0.000348957	-	GO:0016020//membrane	GO:0016298//lipase activity	GO:0006629//lipid metabolic process	gi|937897793|dbj|BAS73773.1|;gi|125527306|gb|EAY75420.1|/0;2.22113e-137/Os01g0688200, partial [Oryza sativa Japonica Group];hypothetical protein OsI_03323 [Oryza sativa Indica Group]
LOC_Os12g37780	2181	25	20	21	148	70	59	2.56098	2.22555	up	1.94e-07	1.44e-05	-	-	-	-	gi|113649554|dbj|BAF30066.1|/0/Os12g0565300 [Oryza sativa Japonica Group]
LOC_Os08g16120	2340	9	2	4	27	23	14	0.570604	2.22499	up	0.000844487	0.0150921	ko04626//Plant-pathogen interaction	GO:0016023//cytoplasmic, membrane-bounded vesicle;GO:0009536//plastid	GO:0043531//ADP binding	-	gi|113623361|dbj|BAF23306.1|/0/Os08g0261000 [Oryza sativa Japonica Group]
LOC_Os01g72900	291	8	1	19	53	14	47	1.34797	2.22162	up	0.00172003	0.0258086	-	-	-	GO:0006950//response to stress	gi|573915411|ref|XP_006645360.1|/8.01999e-16/PREDICTED: abscisic stress-ripening protein 3-like [Oryza brachyantha]
LOC_Os08g10500	276	22	5	68	168	61	153	3.02604	2.21931	up	0.000352862	0.00743245	-	-	-	-	gi|1002288953|ref|XP_015648773.1|/1.11291e-12/PREDICTED: cysteine-rich and transmembrane domain-containing protein A [Oryza sativa Japonica Group]
LOC_Os04g40070	2121	9	3	23	56	38	50	1.65323	2.21388	up	2.59e-05	0.000894328	-	GO:0016021//integral component of membrane	-	-	gi|38344486|emb|CAE05501.2|/0/OSJNBa0022H21.21 [Oryza sativa Japonica Group]
LOC_Os02g36150	1548	30.68	33.91	37.37	146.85	178.62	103.7	3.16377	2.21157	up	2.74e-12	6.78e-10	ko00624//Polycyclic aromatic hydrocarbon degradation;ko00903//Limonene and pinene degradation;ko00460//Cyanoamino acid metabolism;ko00904//Diterpenoid biosynthesis;ko01120//Microbial metabolism in diverse environments;ko01100//Metabolic pathways;ko00627//Aminobenzoate degradation;ko00945//Stilbenoid, diarylheptanoid and gingerol biosynthesis;ko00363//Bisphenol degradation;ko01110//Biosynthesis of…	GO:0016021//integral component of membrane;GO:0016023//cytoplasmic, membrane-bounded vesicle	GO:0005506//iron ion binding;GO:0016709//oxidoreductase activity, acting on paired donors, with incorporation or reduction of molecular oxygen, NAD(P)H as one donor, and incorporation of one atom of oxygen;GO:0020037//heme binding	GO:0044550//secondary metabolite biosynthetic process;GO:0016102//diterpenoid biosynthetic process;GO:0055114//oxidation-reduction process	gi|403399731|sp|A3A871.1|C71Z6_ORYSJ/0/RecName: Full=Ent-isokaurene C2-hydroxylase; AltName: Full=Cytochrome P450 71Z6
LOC_Os05g14240	756	8	18	13	38	46	80	1.83272	2.20769	up	2.92e-06	0.000141214	-	GO:0009705//plant-type vacuole membrane;GO:0005887//integral component of plasma membrane;GO:0042807//central vacuole	GO:0015254//glycerol channel activity;GO:0015250//water channel activity	GO:0009992//cellular water homeostasis;GO:0006833//water transport;GO:0015793//glycerol transport;GO:0034220//ion transmembrane transport	gi|75294967|sp|Q75GA5.1|TIP41_ORYSJ/3.27665e-123/RecName: Full=Probable aquaporin TIP4-1; AltName: Full=Tonoplast intrinsic protein 4-1; Short=OsTIP4;1
LOC_Os01g34890	3675	11	9	18	31	39	87	1.77502	2.20681	up	1.24e-05	0.000484075	-	GO:0016021//integral component of membrane;GO:0000148//1,3-beta-D-glucan synthase complex	GO:0003843//1,3-beta-D-glucan synthase activity	GO:0006075//(1->3)-beta-D-glucan biosynthetic process	gi|218188390|gb|EEC70817.1|/0/hypothetical protein OsI_02281 [Oryza sativa Indica Group]
LOC_Os02g45040	1719	22	11	53	60	48	237	2.88674	2.2059	up	0.000406142	0.00832071	ko03008//Ribosome biogenesis in eukaryotes;ko03018//RNA degradation	GO:0009536//plastid	GO:0003677//DNA binding	GO:0006310//DNA recombination	gi|937905183|dbj|BAS80237.1|/0/Os02g0671800 [Oryza sativa Japonica Group]
LOC_Os07g14150	559	74	17	88	229	119	366	3.91926	2.19948	up	9.9e-06	0.000405522	-	GO:0005829//cytosol	GO:0047974//guanosine deaminase activity;GO:0008270//zinc ion binding	GO:0009451//RNA modification	gi|1002280847|ref|XP_015644720.1|;gi|149392256|gb|ABR25967.1|;gi|992278950|gb|KXG37214.1|/1.98972e-58;2.60109e-67;5.41121e-115/PREDICTED: guanine deaminase [Oryza sativa Japonica Group];cytidine/deoxycytidylate deaminase family protein [Oryza sativa Indica Group] ;hypothetical protein SORBI_001G026900 [Sorghum bicolor]
LOC_Os02g41630	2106	161	250	207	864	606	1075	5.73583	2.19443	up	2.76e-12	6.78e-10	ko00940//Phenylpropanoid biosynthesis;ko00360//Phenylalanine metabolism;ko01100//Metabolic pathways;ko01110//Biosynthesis of secondary metabolites	GO:0005737//cytoplasm	GO:0045548//phenylalanine ammonia-lyase activity	GO:0009800//cinnamic acid biosynthetic process;GO:0006559//L-phenylalanine catabolic process	gi|110815839|sp|P14717.2|PAL1_ORYSJ/0/RecName: Full=Phenylalanine ammonia-lyase
LOC_Os10g16974	1608	11	12	2	20	29	56	1.22942	2.19409	up	0.000396204	0.00817826	ko00941//Flavonoid biosynthesis;ko01100//Metabolic pathways;ko01110//Biosynthesis of secondary metabolites;ko00944//Flavone and flavonol biosynthesis	GO:0016021//integral component of membrane;GO:0016023//cytoplasmic, membrane-bounded vesicle	GO:0005506//iron ion binding;GO:0016709//oxidoreductase activity, acting on paired donors, with incorporation or reduction of molecular oxygen, NAD(P)H as one donor, and incorporation of one atom of oxygen;GO:0020037//heme binding	GO:0044550//secondary metabolite biosynthetic process;GO:0055114//oxidation-reduction process	gi|113638942|dbj|BAF26247.1|/0/Os10g0317900 [Oryza sativa Japonica Group]
LOC_Os02g48360	1854	4	3	7	25	12	21	0.461469	2.19361	up	0.00112338	0.0188304	ko00230//Purine metabolism;ko00051//Fructose and mannose metabolism;ko01100//Metabolic pathways;ko01110//Biosynthesis of secondary metabolites	GO:0005737//cytoplasm	GO:0003872//6-phosphofructokinase activity;GO:0047334//diphosphate-fructose-6-phosphate 1-phosphotransferase activity;GO:0005524//ATP binding	GO:0061615//glycolytic process through fructose-6-phosphate;GO:0046835//carbohydrate phosphorylation;GO:0006002//fructose 6-phosphate metabolic process	gi|113537449|dbj|BAF09832.1|/0/Os02g0714200 [Oryza sativa Japonica Group]
LOC_Os09g19970	804	10	6	13	37	22	59	1.39408	2.18851	up	3.4e-05	0.00111023	-	GO:0016021//integral component of membrane	-	-	gi|113631232|dbj|BAF24913.1|/1.58546e-66/Os09g0364400 [Oryza sativa Japonica Group]
LOC_Os11g22370	3834	14.37	0.25	7.58	34.04	25.5	30.79	1.02899	2.18825	up	0.000468215	0.00930413	ko05166//HTLV-I infection;ko04115//p53 signaling pathway;ko04110//Cell cycle;ko00908//Zeatin biosynthesis;ko05202//Transcriptional misregulation in cancer;ko01100//Metabolic pathways;ko03008//Ribosome biogenesis in eukaryotes;ko04064//NF-kappa B signaling pathway;ko01110//Biosynthesis of secondary metabolites;ko04210//Apoptosis;ko03018//RNA degradation	-	GO:0003676//nucleic acid binding;GO:0008270//zinc ion binding	GO:0015074//DNA integration	gi|62701755|gb|AAX92828.1|/0/retrotransposon protein, putative, Ty1-copia sub-class [Oryza sativa Japonica Group]
LOC_Os04g51160	1008	54	18	67	240	121	193	3.55346	2.18335	up	9.15e-08	7.28e-06	-	GO:0016021//integral component of membrane;GO:0070469//respiratory chain;GO:0005739//mitochondrion	GO:0009916//alternative oxidase activity;GO:0046872//metal ion binding	GO:0055114//oxidation-reduction process	gi|3218543|dbj|BAA28771.1|/0/alternative oxidase [Oryza sativa Japonica Group]
LOC_Os06g48180	833	8	2	15	29	17	54	1.17498	2.17897	up	0.000620828	0.0117406	ko04075//Plant hormone signal transduction	GO:0005618//cell wall;GO:0048046//apoplast;GO:0016023//cytoplasmic, membrane-bounded vesicle	GO:0004553//hydrolase activity, hydrolyzing O-glycosyl compounds;GO:0016762//xyloglucan:xyloglucosyl transferase activity	GO:0071555//cell wall organization;GO:0010411//xyloglucan metabolic process;GO:0042546//cell wall biogenesis	gi|113596497|dbj|BAF20371.1|/0/Os06g0696600 [Oryza sativa Japonica Group]
LOC_Os11g18110	1710	3	13	2	26	34	17	0.81035	2.17842	up	0.00156731	0.0241328	-	GO:0016020//membrane	-	-	gi|108864250|gb|ABA92742.2|/0/POT family protein [Oryza sativa Japonica Group]
LOC_Os04g49450	1392	33	11	73	148	92	220	3.29299	2.1744	up	1.73e-05	0.000638684	ko04712//Circadian rhythm - plant	GO:0005634//nucleus	GO:0003677//DNA binding	GO:0006355//regulation of transcription, DNA-templated	gi|261488390|emb|CBH19570.1|;gi|38346813|emb|CAD41380.2|/0;0/DNA binding domain protein [Oryza sativa Indica Group];OSJNBa0088A01.20 [Oryza sativa Japonica Group]
LOC_Os08g39730	1521	231	57	369	995	617	951	5.7506	2.16559	up	3.37e-06	0.000160191	ko00941//Flavonoid biosynthesis;ko00624//Polycyclic aromatic hydrocarbon degradation;ko00903//Limonene and pinene degradation;ko00940//Phenylpropanoid biosynthesis;ko00904//Diterpenoid biosynthesis;ko01120//Microbial metabolism in diverse environments;ko01100//Metabolic pathways;ko00627//Aminobenzoate degradation;ko00945//Stilbenoid, diarylheptanoid and gingerol biosynthesis;ko00363//Bisphenol de…	GO:0016021//integral component of membrane;GO:0016023//cytoplasmic, membrane-bounded vesicle	GO:0005506//iron ion binding;GO:0016709//oxidoreductase activity, acting on paired donors, with incorporation or reduction of molecular oxygen, NAD(P)H as one donor, and incorporation of one atom of oxygen;GO:0020037//heme binding	GO:0006952//defense response;GO:0051502;GO:0055114//oxidation-reduction process	gi|19849281|gb|AAL99547.1|AF488522_1/0/Cyt-P450 monooxygenase [Oryza sativa Japonica Group]
LOC_Os07g39740	1218	5	10	8	29	41	25	1.0893	2.1631	up	2.04e-05	0.00073361	ko00230//Purine metabolism;ko04142//Lysosome;ko01120//Microbial metabolism in diverse environments;ko01100//Metabolic pathways;ko00030//Pentose phosphate pathway;ko00906//Carotenoid biosynthesis;ko01110//Biosynthesis of secondary metabolites;ko00511//Other glycan degradation;ko00250//Alanine, aspartate and glutamate metabolism	GO:0016023//cytoplasmic, membrane-bounded vesicle;GO:0005739//mitochondrion	GO:0016788//hydrolase activity, acting on ester bonds	-	gi|218199924|gb|EEC82351.1|/0/hypothetical protein OsI_26660 [Oryza sativa Indica Group]
LOC_Os02g54254	3183	900	202	2511	5550	2518	5826	8.19437	2.16239	up	0.000362686	0.00758436	ko00310//Lysine degradation;ko01100//Metabolic pathways;ko01110//Biosynthesis of secondary metabolites	GO:0016021//integral component of membrane	GO:0016491//oxidoreductase activity	GO:0055114//oxidation-reduction process	gi|311893431|dbj|BAJ25847.1|;gi|47497245|dbj|BAD19289.1|/0;2.67344e-156/lysine ketoglutarate reductase/saccharopine dehydrogenase [Oryza sativa Japonica Group];lysine-ketoglutarate reductase/saccharopine dehydrogenase bifunctional enzyme-like [Oryza sativa Japonica Group]
LOC_Os03g01580	2640	18	14	47	107	97	110	2.7426	2.15936	up	6.41e-08	5.44e-06	-	GO:0005739//mitochondrion	-	-	gi|108705737|gb|ABF93532.1|/0/expressed protein [Oryza sativa Japonica Group]
LOC_Os07g14850	3279	13	14	18	62	49	70	1.97748	2.15882	up	3.58e-08	3.3e-06	-	GO:0005886//plasma membrane;GO:0016021//integral component of membrane	GO:0016760//cellulose synthase (UDP-forming) activity;GO:0008270//zinc ion binding	GO:0071555//cell wall organization;GO:0030244//cellulose biosynthetic process	gi|75325284|sp|Q6YVM4.1|CESA6_ORYSJ/0/RecName: Full=Probable cellulose synthase A catalytic subunit 6 [UDP-forming]; AltName: Full=OsCesA6
LOC_Os03g27980	1479	13	2	23	65	23	60	1.71169	2.15542	up	0.00041922	0.00855208	ko04075//Plant hormone signal transduction	GO:0046658//anchored component of plasma membrane	GO:0004553//hydrolase activity, hydrolyzing O-glycosyl compounds;GO:0030247//polysaccharide binding	GO:0005975//carbohydrate metabolic process	gi|255674565|dbj|BAH92189.1|/0/Os03g0397600 [Oryza sativa Japonica Group]
LOC_Os06g47130	1623	68	33	111	390	139	295	4.13183	2.15454	up	6.81e-07	4.04e-05	-	GO:0016021//integral component of membrane;GO:0005783//endoplasmic reticulum	GO:0008289//lipid binding	-	gi|937924273|dbj|BAS99190.1|;gi|52076667|dbj|BAD45567.1|/0;0/Os06g0685300 [Oryza sativa Japonica Group];putative CLB1 protein [Oryza sativa Japonica Group]
LOC_Os10g38140	735	13	10	5	40	55	20	1.34114	2.15406	up	5.73e-05	0.00169743	ko00980//Metabolism of xenobiotics by cytochrome P450;ko05200//Pathways in cancer;ko00480//Glutathione metabolism;ko00982//Drug metabolism - cytochrome P450;ko05215//Prostate cancer	GO:0005737//cytoplasm	GO:0004364//glutathione transferase activity	GO:0009407//toxin catabolic process;GO:0006749//glutathione metabolic process	gi|110289454|gb|ABB47914.2|/3.21882e-169/Glutathione S-transferase, N-terminal domain containing protein, expressed [Oryza sativa Japonica Group]
LOC_Os01g40260	741	4	26	4	55	35	51	1.63751	2.15384	up	0.000670397	0.0124932	ko04626//Plant-pathogen interaction	-	GO:0043565//sequence-specific DNA binding;GO:0003700//transcription factor activity, sequence-specific DNA binding	GO:0006355//regulation of transcription, DNA-templated	gi|14588677|dbj|BAB61842.1|/5.20568e-151/WRKY transcription factor 28-like [Oryza sativa Japonica Group]
LOC_Os01g20206	804	30	6	44	119	69	122	2.73649	2.14628	up	1.23e-05	0.000481195	-	GO:0005768//endosome;GO:0005774//vacuolar membrane;GO:0005802//trans-Golgi network	GO:0008757//S-adenosylmethionine-dependent methyltransferase activity	GO:0032259//methylation	gi|1002226152|ref|XP_015625388.1|/0/PREDICTED: putative methyltransferase DDB_G0268948 [Oryza sativa Japonica Group]
LOC_Os12g04370	2934	4	2	4	15.01	10	15.56	0.0295454	2.14563	up	0.00372086	0.0450881	ko04075//Plant hormone signal transduction	-	-	-	gi|77552978|gb|ABA95774.1|/0/GRAS family transcription factor containing protein [Oryza sativa Japonica Group]
LOC_Os08g42960	1674	14	13	18	49	50	80	1.96396	2.14386	up	1.55e-07	1.18e-05	-	GO:0016021//integral component of membrane	-	-	gi|113624363|dbj|BAF24308.1|/0/Os08g0542700 [Oryza sativa Japonica Group]
LOC_Os02g36264	2466	1	9	8.17	20	38	17	0.777387	2.14363	up	0.00090907	0.0159637	ko00904//Diterpenoid biosynthesis;ko01100//Metabolic pathways;ko01110//Biosynthesis of secondary metabolites	GO:0009536//plastid;GO:0005739//mitochondrion	GO:0034281;GO:0009899//ent-kaurene synthase activity;GO:0000287//magnesium ion binding;GO:0034282	GO:0051501//diterpene phytoalexin metabolic process;GO:0006952//defense response;GO:0009685//gibberellin metabolic process	gi|229890376|sp|A4KAG8.2|KSL6_ORYSJ/0/RecName: Full=Ent-isokaur-15-ene synthase; AltName: Full=Ent-kaurene synthase-like 5; Short=OsKS5; AltName: Full=Ent-kaurene synthase-like 6; Short=OsKS6; Short=OsKSL6; AltName: Full=Iso-kaurene synthase
LOC_Os07g41310	1341	4	4	4	13	18	18	0.251072	2.14207	up	0.00142785	0.0226275	-	GO:0005886//plasma membrane;GO:0031225//anchored component of membrane;GO:0016023//cytoplasmic, membrane-bounded vesicle	-	GO:0010215//cellulose microfibril organization;GO:0016049//cell growth	gi|75133695|sp|Q6Z4G8.1|COBL1_ORYSJ/0/RecName: Full=COBRA-like protein 1; AltName: Full=Protein BRITTLE CULM1-like 6; Flags: Precursor
LOC_Os02g02780	1752	21	11	30	44	49	148	2.38673	2.13808	up	4.35e-05	0.0013576	ko04075//Plant hormone signal transduction;ko04530//Tight junction;ko04010//MAPK signaling pathway	GO:0009536//plastid	GO:0016597//amino acid binding;GO:0005524//ATP binding;GO:0004674//protein serine/threonine kinase activity	GO:0006468//protein phosphorylation	gi|113535237|dbj|BAF07620.1|/0/Os02g0120100 [Oryza sativa Japonica Group]
LOC_Os05g39350	1503	5	17	10	57	31	40	1.51067	2.13148	up	3.6e-05	0.00116362	-	GO:0016021//integral component of membrane;GO:0005794//Golgi apparatus	GO:0016413//O-acetyltransferase activity	GO:0071554//cell wall organization or biogenesis	gi|937919564|dbj|BAS94482.1|/0/Os05g0470000 [Oryza sativa Japonica Group]
LOC_Os04g37570	1395	26	7	9	90	30	43	1.84651	2.12853	up	0.000138276	0.00349353	ko00903//Limonene and pinene degradation;ko00642//Ethylbenzene degradation;ko00362//Benzoate degradation;ko00240//Pyrimidine metabolism;ko00051//Fructose and mannose metabolism;ko01120//Microbial metabolism in diverse environments;ko01100//Metabolic pathways;ko00627//Aminobenzoate degradation;ko00350//Tyrosine metabolism	GO:0016020//membrane	GO:0004190//aspartic-type endopeptidase activity	GO:0006508//proteolysis;GO:0030163//protein catabolic process	gi|38344830|emb|CAD40872.2|/0/OSJNBa0064H22.11 [Oryza sativa Japonica Group]
LOC_Os10g07210	594	7	8	5	24	24	32	0.879325	2.12837	up	6.55e-05	0.00189928	ko04141//Protein processing in endoplasmic reticulum	GO:0009536//plastid	-	-	gi|31430296|gb|AAP52230.1|/3.02617e-126/Hsp20/alpha crystallin family protein, expressed [Oryza sativa Japonica Group]
LOC_Os06g36560	927	66	11	100	212	139	320	3.83891	2.12756	up	5.95e-05	0.00174825	ko00562//Inositol phosphate metabolism;ko00053//Ascorbate and aldarate metabolism	GO:0005737//cytoplasm	GO:0005506//iron ion binding;GO:0050113//inositol oxygenase activity	GO:0019310//inositol catabolic process;GO:0055114//oxidation-reduction process	gi|75112464|sp|Q5Z8T3.1|MIOX_ORYSJ/0/RecName: Full=Probable inositol oxygenase; AltName: Full=Myo-inositol oxygenase; Short=MI oxygenase
LOC_Os04g15610	5976	14.09	2.56	4.49	25.76	16.74	40.15	0.92898	2.12751	up	0.00102424	0.0174092	ko03440//Homologous recombination;ko00240//Pyrimidine metabolism;ko01100//Metabolic pathways;ko03460//Fanconi anemia pathway;ko02020//Two-component system;ko02010//ABC transporters;ko00670//One carbon pool by folate	-	GO:0004523//RNA-DNA hybrid ribonuclease activity;GO:0003676//nucleic acid binding	GO:0090502//RNA phosphodiester bond hydrolysis, endonucleolytic;GO:0015074//DNA integration	gi|38346888|emb|CAE03913.2|/0/OSJNBb0015G09.7 [Oryza sativa Japonica Group]
LOC_Os08g43400	3012	10	13	12	47	48	44	1.6145	2.12543	up	2.22e-07	1.6e-05	-	-	-	-	gi|222640978|gb|EEE69110.1|;gi|937931640|dbj|BAT06556.1|;gi|113624398|dbj|BAF24343.1|/0;0;0/hypothetical protein OsJ_28179 [Oryza sativa Japonica Group];Os08g0547500 [Oryza sativa Japonica Group];Os08g0547500 [Oryza sativa Japonica Group]
LOC_Os03g43684	4608	40	40	36	152	145	159	3.27707	2.12277	up	3.57e-13	1.09e-10	-	-	GO:0003779//actin binding;GO:0016301//kinase activity	GO:0016310//phosphorylation	gi|108710002|gb|ABF97797.1|/0/expressed protein [Oryza sativa Japonica Group]
LOC_Os09g26780	699	5	15	38	28	61	136	2.28698	2.12255	up	0.00086195	0.0153186	ko04626//Plant-pathogen interaction;ko04075//Plant hormone signal transduction	GO:0005829//cytosol;GO:0005634//nucleus	GO:0003714//transcription corepressor activity	GO:1903507//negative regulation of nucleic acid-templated transcription;GO:2000022//regulation of jasmonic acid mediated signaling pathway;GO:0009611//response to wounding;GO:0006355//regulation of transcription, DNA-templated;GO:0031347//regulation of defense response	gi|75118454|sp|Q69P94.1|TI10C_ORYSJ/3.53152e-132/RecName: Full=Protein TIFY 10c; Short=OsTIFY10c; AltName: Full=Jasmonate ZIM domain-containing protein 8; Short=OsJAZ8; AltName: Full=OsJAZ7
LOC_Os10g04450	1194	5	6	7	20	29	23	0.736076	2.12164	up	0.000112931	0.00295719	-	-	GO:0005524//ATP binding	GO:0006915//apoptotic process	gi|1002299852|ref|XP_015613325.1|/0/PREDICTED: uncharacterized protein LOC4348050 [Oryza sativa Japonica Group]
LOC_Os05g23320	2013	128	55	162	479	302	536	4.80309	2.1206	up	4.63e-09	5.55e-07	-	-	-	-	gi|1002271023|ref|XP_015639835.1|/0/PREDICTED: ankycorbin [Oryza sativa Japonica Group]
LOC_Os05g33644	2700	26	11	49	140	101	90	2.82452	2.11975	up	4.57e-07	2.88e-05	ko00240//Pyrimidine metabolism	-	-	-	gi|1002266785|ref|XP_015637724.1|/0/PREDICTED: uncharacterized protein LOC4338757 isoform X1 [Oryza sativa Japonica Group]
LOC_Os03g50810	2889	27	26	40	128	133	103	2.95294	2.11782	up	1.86e-11	4.01e-09	ko00903//Limonene and pinene degradation;ko00642//Ethylbenzene degradation;ko00362//Benzoate degradation;ko00240//Pyrimidine metabolism;ko00051//Fructose and mannose metabolism;ko01120//Microbial metabolism in diverse environments;ko01100//Metabolic pathways;ko00627//Aminobenzoate degradation;ko00350//Tyrosine metabolism	GO:0016021//integral component of membrane	GO:0005524//ATP binding;GO:0004674//protein serine/threonine kinase activity	GO:0006468//protein phosphorylation	gi|108710763|gb|ABF98558.1|/0/Protein kinase domain containing protein, expressed [Oryza sativa Japonica Group]
LOC_Os11g36200	1605	8	12	7	42	19	45	1.26395	2.1153	up	9.07e-05	0.00247326	ko04626//Plant-pathogen interaction	-	GO:0016301//kinase activity	GO:0016310//phosphorylation	gi|1002303385|ref|XP_015615078.1|/0/PREDICTED: putative receptor-like protein kinase At3g47110 isoform X1 [Oryza sativa Japonica Group]
LOC_Os08g10300	3072	39	41	33	173	134	135	3.23596	2.11507	up	5.55e-12	1.33e-09	ko05142//Chagas disease (American trypanosomiasis);ko05133//Pertussis;ko05145//Toxoplasmosis;ko04722//Neurotrophin signaling pathway;ko05162//Measles;ko04620//Toll-like receptor signaling pathway;ko05164//Influenza A;ko05140//Leishmaniasis;ko05152//Tuberculosis;ko04064//NF-kappa B signaling pathway;ko04210//Apoptosis	GO:0005886//plasma membrane;GO:0016021//integral component of membrane;GO:0016023//cytoplasmic, membrane-bounded vesicle;GO:0005739//mitochondrion	GO:0005524//ATP binding;GO:0004674//protein serine/threonine kinase activity	GO:0006468//protein phosphorylation	gi|1002291244|ref|XP_015649960.1|/0/PREDICTED: probable LRR receptor-like serine/threonine-protein kinase At1g56140 [Oryza sativa Japonica Group]
LOC_Os01g61760	1554	3	8	6	18	25	25	0.666747	2.11468	up	0.000338441	0.0071871	-	-	-	-	gi|1002236694|ref|XP_015622536.1|;gi|1002236692|ref|XP_015622534.1|/0;0/PREDICTED: interactor of constitutive active ROPs 2, chloroplastic isoform X2 [Oryza sativa Japonica Group];PREDICTED: interactor of constitutive active ROPs 2, chloroplastic isoform X1 [Oryza sativa Japonica Group]
LOC_Os02g09940	678	6	7	6	30	24	21	0.797059	2.10881	up	9.2e-05	0.00249766	ko04146//Peroxisome;ko05146//Amoebiasis	GO:0009570//chloroplast stroma	GO:0004601//peroxidase activity;GO:0051920//peroxiredoxin activity	GO:0098869//cellular oxidant detoxification;GO:0055114//oxidation-reduction process	gi|75139348|sp|Q7F8S5.1|PR2E2_ORYSJ/1.51111e-112/RecName: Full=Peroxiredoxin-2E-2, chloroplastic; AltName: Full=Peroxiredoxin IIE-2; AltName: Full=Thioredoxin reductase 2E-2; Flags: Precursor
LOC_Os02g37700	1308	7	12	6	18	38	43	1.15855	2.10246	up	0.000111785	0.00294046	ko00564//Glycerophospholipid metabolism;ko04142//Lysosome	-	GO:0008374//O-acyltransferase activity	GO:0006629//lipid metabolic process	gi|255671041|dbj|BAF09195.2|/0/Os02g0589700 [Oryza sativa Japonica Group]
LOC_Os03g49380	2634	76	45	199	381	261	554	4.67048	2.09855	up	2.54e-06	0.000125509	ko00591//Linoleic acid metabolism	-	GO:0046872//metal ion binding;GO:0016702//oxidoreductase activity, acting on single donors with incorporation of molecular oxygen, incorporation of two atoms of oxygen	GO:0031408//oxylipin biosynthetic process;GO:0055114//oxidation-reduction process	gi|73920878|sp|Q53RB0.1|LOX4_ORYSJ;gi|108710598|gb|ABF98393.1|/0;0/RecName: Full=Probable linoleate 9S-lipoxygenase 4; AltName: Full=Lipoxygenase 4;Lipoxygenase 3, putative, expressed [Oryza sativa Japonica Group]
LOC_Os05g46350	1227	12	4	17	49	22	54	1.48909	2.0984	up	9.93e-05	0.00265815	-	-	-	-	gi|113579737|dbj|BAF18100.1|/0/Os05g0541100 [Oryza sativa Japonica Group]
LOC_Os10g42610	684	27	61	26	88	182	181	3.25682	2.09815	up	3.95e-07	2.57e-05	-	GO:0009536//plastid	-	-	gi|31433670|gb|AAP55154.1|;gi|78709047|gb|ABB48022.1|/1.42105e-84;3.00859e-71/expressed protein [Oryza sativa Japonica Group];expressed protein [Oryza sativa Japonica Group]
LOC_Os02g45780	495	22	3	35	91	27	103	2.28324	2.08873	up	0.000882852	0.0155603	ko01100//Metabolic pathways;ko00563//Glycosylphosphatidylinositol(GPI)-anchor biosynthesis	GO:0016023//cytoplasmic, membrane-bounded vesicle	GO:0008270//zinc ion binding	-	gi|113537281|dbj|BAF09664.1|/1.2621e-78/Os02g0682300 [Oryza sativa Japonica Group]
LOC_Os01g47070	906	14	22	20	78	69	69	2.2316	2.08865	up	9.79e-09	1.04e-06	ko00500//Starch and sucrose metabolism;ko00520//Amino sugar and nucleotide sugar metabolism;ko01100//Metabolic pathways;ko01110//Biosynthesis of secondary metabolites	GO:0005576//extracellular region;GO:0016023//cytoplasmic, membrane-bounded vesicle	GO:0004568//chitinase activity;GO:0008061//chitin binding	GO:0005975//carbohydrate metabolic process;GO:0006032//chitin catabolic process	gi|2696231|dbj|BAA23811.1|/0/chitinase [Oryza sativa Japonica Group]
LOC_Os09g04970	2835	10.32	9.34	0.97	29.48	11.39	38.52	0.88921	2.08062	up	0.00339189	0.0419903	-	-	-	-	gi|62733859|gb|AAX95968.1|/0/retrotransposon protein, putative, Ty3-gypsy sub-class [Oryza sativa Japonica Group]
LOC_Os12g29580	2364	3	4	8	13	20	25	0.471935	2.07995	up	0.00167744	0.0252393	-	GO:0005737//cytoplasm;GO:0005634//nucleus;GO:0005886//plasma membrane	GO:0004674//protein serine/threonine kinase activity;GO:0005524//ATP binding	GO:0006468//protein phosphorylation;GO:0035556//intracellular signal transduction	gi|255670306|dbj|BAF29788.2|;gi|1002313529|ref|XP_015620136.1|/0;0/Os12g0480200 [Oryza sativa Japonica Group];PREDICTED: serine/threonine-protein kinase D6PKL1 [Oryza sativa Japonica Group]
LOC_Os03g28330	2451	16	37	30	88	91	139	2.77922	2.07889	up	7.74e-08	6.3e-06	ko00500//Starch and sucrose metabolism;ko01100//Metabolic pathways	GO:0000124//SAGA complex;GO:0005643//nuclear pore;GO:0070390//transcription export complex 2;GO:0071819//DUBm complex	GO:0016157//sucrose synthase activity;GO:0003713//transcription coactivator activity	GO:0045893//positive regulation of transcription, DNA-templated;GO:0006406//mRNA export from nucleus;GO:0015031//protein transport;GO:0005985//sucrose metabolic process;GO:0016578//histone deubiquitination;GO:0010037//response to carbon dioxide;GO:0006368//transcription elongation from RNA polymerase II promoter	gi|401140|sp|P31924.1|SUS1_ORYSJ/0/RecName: Full=Sucrose synthase 1; Short=OsSUS1; AltName: Full=Sucrose synthase 2; Short=RSs2; AltName: Full=Sucrose-UDP glucosyltransferase 1
LOC_Os02g07060	1344	17	20	11	55	55	74	2.01347	2.07691	up	2.66e-07	1.88e-05	ko04540//Gap junction;ko04145//Phagosome;ko05130//Pathogenic Escherichia coli infection	GO:0005737//cytoplasm;GO:0005874//microtubule	GO:0005200//structural constituent of cytoskeleton;GO:0005525//GTP binding;GO:0003924//GTPase activity	GO:0007018//microtubule-based movement	gi|1174600|sp|P46265.1|TBB5_ORYSJ/0/RecName: Full=Tubulin beta-5 chain; AltName: Full=Beta-5-tubulin
LOC_Os06g48300	984	79	28	135	408	142	336	4.25139	2.07675	up	1.34e-05	0.000517702	ko04075//Plant hormone signal transduction	-	GO:0046872//metal ion binding;GO:0004722//protein serine/threonine phosphatase activity	GO:0006470//protein dephosphorylation	gi|113596504|dbj|BAF20378.1|/0/Os06g0698300 [Oryza sativa Japonica Group]
LOC_Os09g37200	1359	25	13	38	107	92	87	2.62498	2.0763	up	1.92e-08	1.92e-06	ko00941//Flavonoid biosynthesis;ko00940//Phenylpropanoid biosynthesis;ko00945//Stilbenoid, diarylheptanoid and gingerol biosynthesis;ko01110//Biosynthesis of secondary metabolites	-	GO:0016747//transferase activity, transferring acyl groups other than amino-acyl groups	-	gi|113632062|dbj|BAF25743.1|/0/Os09g0544000 [Oryza sativa Japonica Group]
LOC_Os03g04660	1551	25	50	27	130	146	118	3.07358	2.07587	up	2e-09	2.64e-07	ko00073//Cutin, suberine and wax biosynthesis;ko01100//Metabolic pathways	GO:0016020//membrane	GO:0020037//heme binding;GO:0016705//oxidoreductase activity, acting on paired donors, with incorporation or reduction of molecular oxygen;GO:0004497//monooxygenase activity;GO:0005506//iron ion binding	GO:0055114//oxidation-reduction process	gi|108706099|gb|ABF93894.1|/0/Cytochrome P450 family protein, expressed [Oryza sativa Japonica Group]
LOC_Os03g15270	1104	23	4	21	61	36	81	1.97619	2.07442	up	5.28e-05	0.00158191	ko04075//Plant hormone signal transduction	GO:0005739//mitochondrion	GO:0016787//hydrolase activity	GO:0008152//metabolic process	gi|108707266|gb|ABF95061.1|/0/expressed protein [Oryza sativa Japonica Group]
LOC_Os01g03390	558	510	413	511	1342	1514	2529	6.83227	2.07254	up	2.1e-12	5.51e-10	-	GO:0005576//extracellular region;GO:0016023//cytoplasmic, membrane-bounded vesicle	GO:0004867//serine-type endopeptidase inhibitor activity	GO:0010951//negative regulation of endopeptidase activity	gi|7635919|emb|CAB88391.1|/5.13657e-90/putative Bowman Birk trypsin inhibitor [Oryza sativa Indica Group]
LOC_Os07g47700	1338	47	57	44	220	187	156	3.58526	2.07002	up	2.05e-12	5.46e-10	ko00521//Streptomycin biosynthesis;ko03440//Homologous recombination;ko00520//Amino sugar and nucleotide sugar metabolism;ko01100//Metabolic pathways;ko00523//Polyketide sugar unit biosynthesis;ko02010//ABC transporters;ko03430//Mismatch repair;ko01110//Biosynthesis of secondary metabolites;ko03030//DNA replication	GO:0016021//integral component of membrane	-	-	gi|50284521|dbj|BAD29712.1|/0/UDP-glucuronic acid decarboxylase [Oryza sativa Japonica Group]
LOC_Os11g47840	1125	27	9	38	124	46	102	2.57244	2.06932	up	2.14e-05	0.000761664	-	GO:0005794//Golgi apparatus;GO:0016021//integral component of membrane	GO:0004252//serine-type endopeptidase activity	GO:0016485//protein processing	gi|113645769|dbj|BAF28910.1|/0/Os11g0704800 [Oryza sativa Japonica Group]
LOC_Os06g35200	2052	2	12	7	20	47	16	0.917495	2.06823	up	0.00149614	0.0234428	ko04075//Plant hormone signal transduction	GO:0016020//membrane;GO:0016023//cytoplasmic, membrane-bounded vesicle	GO:0016301//kinase activity	GO:0016310//phosphorylation	gi|937923225|dbj|BAS98142.1|/0/Os06g0544100 [Oryza sativa Japonica Group]
LOC_Os07g03020	1437	20	23	18	73	83.08	76	2.33219	2.06589	up	2.12e-09	2.77e-07	-	-	-	-	gi|125598962|gb|EAZ38538.1|/0/hypothetical protein OsJ_22926 [Oryza sativa Japonica Group]
LOC_Os02g49310	1767	11	4	9	28	48	16	1.05604	2.06517	up	0.000254714	0.00575179	-	GO:0009536//plastid;GO:0005634//nucleus;GO:0005886//plasma membrane	GO:0004674//protein serine/threonine kinase activity;GO:0005524//ATP binding	GO:0006468//protein phosphorylation;GO:0035556//intracellular signal transduction	gi|113537511|dbj|BAF09894.1|/0/Os02g0725000 [Oryza sativa Japonica Group]
LOC_Os04g17510	3621	2.25	5.96	5.44	15.62	15.28	21.62	0.354713	2.06277	up	0.00251135	0.033634	-	GO:0071013//catalytic step 2 spliceosome	-	GO:0000398//mRNA splicing, via spliceosome	gi|38344351|emb|CAD40173.2|/0/OSJNBa0061A09.12 [Oryza sativa Japonica Group]
LOC_Os05g06390	5811	5	4	4	14.67	10	24.82	0.286735	2.06204	up	0.00342836	0.042387	ko03013//RNA transport;ko03015//mRNA surveillance pathway;ko03008//Ribosome biogenesis in eukaryotes;ko03018//RNA degradation	GO:0005739//mitochondrion	GO:0003676//nucleic acid binding	-	gi|45267888|gb|AAS55787.1|/0/hypothetical protein [Oryza sativa Japonica Group]
LOC_Os05g08370	3231	45	62	42	163	151	248	3.59192	2.06125	up	3.83e-10	6.18e-08	-	GO:0005886//plasma membrane;GO:0016021//integral component of membrane	GO:0046872//metal ion binding;GO:0016760//cellulose synthase (UDP-forming) activity	GO:0071555//cell wall organization;GO:0030244//cellulose biosynthetic process	gi|75254483|sp|Q6AT26.1|CESA1_ORYSJ/0/RecName: Full=Probable cellulose synthase A catalytic subunit 1 [UDP-forming]; AltName: Full=OsCesA1
LOC_Os01g62900	2208	131	157	119	782	291	444	5.02295	2.05728	up	1.58e-08	1.61e-06	ko00330//Arginine and proline metabolism;ko01100//Metabolic pathways	GO:0005737//cytoplasm	GO:0004349//glutamate 5-kinase activity;GO:0004350//glutamate-5-semialdehyde dehydrogenase activity	GO:0016310//phosphorylation;GO:0006561//proline biosynthetic process;GO:0055114//oxidation-reduction process	gi|113534333|dbj|BAF06716.1|/0/Os01g0848200 [Oryza sativa Japonica Group]
LOC_Os07g05470	2463	8	7	8	26	29	32	0.999556	2.05428	up	3.27e-05	0.00107201	-	GO:0009574//preprophase band;GO:0009524//phragmoplast;GO:0009536//plastid;GO:0055028//cortical microtubule	-	-	gi|50509252|dbj|BAD30535.1|;gi|1002286155|ref|XP_015647374.1|/0;0/putative leucine rich repeat protein [Oryza sativa Japonica Group];PREDICTED: 187-kDa microtubule-associated protein AIR9 isoform X2 [Oryza sativa Japonica Group]
LOC_Os10g19160	3102	10	3	9	21	35	27	0.930716	2.05273	up	0.000109382	0.00288517	ko04626//Plant-pathogen interaction	-	GO:0016301//kinase activity	-	gi|937935474|dbj|BAT10388.1|/0/Os10g0337400 [Oryza sativa Japonica Group]
LOC_Os11g34110	1347	4	8	5	33	21	11	0.622795	2.05162	up	0.00189023	0.0276317	ko00531//Glycosaminoglycan degradation;ko04142//Lysosome;ko01100//Metabolic pathways	GO:0016021//integral component of membrane	-	-	gi|77551354|gb|ABA94151.1|/0/expressed protein [Oryza sativa Japonica Group]
LOC_Os12g36850	477	22	59	28	73	194	152	3.15506	2.04868	up	2.88e-06	0.000139931	-	GO:0005737//cytoplasm;GO:0005634//nucleus	GO:0004864//protein phosphatase inhibitor activity;GO:0004872//receptor activity;GO:0010427//abscisic acid binding	GO:0006952//defense response;GO:0009738//abscisic acid-activated signaling pathway;GO:0043086//negative regulation of catalytic activity;GO:0080163//regulation of protein serine/threonine phosphatase activity;GO:0009607//response to biotic stimulus	gi|77556752|gb|ABA99548.1|/3.52433e-113/Pathogenesis-related protein Bet v I family protein, expressed [Oryza sativa Japonica Group]
LOC_Os03g35560	3747	3.62	5.57	5.59	19.57	11.96	24.17	0.435614	2.04637	up	0.00218331	0.0304046	ko05166//HTLV-I infection;ko04115//p53 signaling pathway;ko00900//Terpenoid backbone biosynthesis;ko04110//Cell cycle;ko00908//Zeatin biosynthesis;ko05202//Transcriptional misregulation in cancer;ko01100//Metabolic pathways;ko03008//Ribosome biogenesis in eukaryotes;ko04064//NF-kappa B signaling pathway;ko01110//Biosynthesis of secondary metabolites;ko04210//Apoptosis;ko03018//RNA degradation	-	GO:0003676//nucleic acid binding;GO:0008270//zinc ion binding	GO:0015074//DNA integration	gi|108709252|gb|ABF97047.1|/0/retrotransposon protein, putative, Ty1-copia subclass [Oryza sativa Japonica Group]
LOC_Os10g26720	1284	16	14	5	26	31	74	1.55841	2.04481	up	0.000264439	0.00594477	-	-	-	-	gi|937935871|dbj|BAT10785.1|/0/Os10g0407400 [Oryza sativa Japonica Group]
LOC_Os11g45740	858	67	30	104	181	174	373	3.9673	2.04436	up	9.1e-07	5.23e-05	-	-	GO:0003677//DNA binding	-	gi|13177578|gb|AAK08983.1|/0/Myb transcription factor JAMyb [Oryza sativa Japonica Group]
LOC_Os04g01400	3594	8.26	4.07	2	17.96	11.17	24.65	0.392682	2.04379	up	0.00385314	0.0463537	ko03440//Homologous recombination;ko00240//Pyrimidine metabolism;ko01100//Metabolic pathways;ko03460//Fanconi anemia pathway;ko02020//Two-component system;ko02010//ABC transporters;ko00670//One carbon pool by folate	-	GO:0003723//RNA binding;GO:0003964//RNA-directed DNA polymerase activity;GO:0004523//RNA-DNA hybrid ribonuclease activity;GO:0003677//DNA binding;GO:0005351//sugar:proton symporter activity	GO:0090502//RNA phosphodiester bond hydrolysis, endonucleolytic;GO:0006310//DNA recombination;GO:0009401//phosphoenolpyruvate-dependent sugar phosphotransferase system;GO:0006278//RNA-dependent DNA biosynthetic process;GO:0015074//DNA integration	gi|38346203|emb|CAD39341.2|/0/OSJNBa0094O15.10 [Oryza sativa Japonica Group]
LOC_Os10g25290	516	24	29	31	101	75	134	2.75503	2.0398	up	1.33e-08	1.37e-06	ko04626//Plant-pathogen interaction;ko04075//Plant hormone signal transduction	GO:0005634//nucleus	GO:0003714//transcription corepressor activity	GO:1903507//negative regulation of nucleic acid-templated transcription;GO:2000022//regulation of jasmonic acid mediated signaling pathway;GO:0009611//response to wounding;GO:0006355//regulation of transcription, DNA-templated;GO:0031347//regulation of defense response	gi|75141737|sp|Q7XEZ1.1|TI11D_ORYSJ/4.81945e-109/RecName: Full=Protein TIFY 11d; Short=OsTIFY11d; AltName: Full=Jasmonate ZIM domain-containing protein 12; Short=OsJAZ12; AltName: Full=OsJAZ1
LOC_Os02g55590	1641	23	23	22	94	80	77	2.45216	2.03022	up	2.22e-09	2.84e-07	-	GO:0016021//integral component of membrane	-	-	gi|113537939|dbj|BAF10322.1|;gi|937906340|dbj|BAS81394.1|/0;0/Os02g0799300 [Oryza sativa Japonica Group];Os02g0799300, partial [Oryza sativa Japonica Group]
LOC_Os04g58090	768	41	17	87	170	147	202	3.48289	2.02525	up	1.35e-06	7.17e-05	-	GO:0016020//membrane	-	-	gi|38344198|emb|CAE05763.2|/1.42748e-138/OSJNBa0064G10.14 [Oryza sativa Japonica Group]
LOC_Os07g07930	513	36	12	52	97	128	136	2.96021	2.02255	up	3.31e-07	2.23e-05	-	-	GO:0008289//lipid binding;GO:0008233//peptidase activity	GO:0006869//lipid transport;GO:0006508//proteolysis	gi|25553602|dbj|BAC24867.1|/2.09951e-69/protease inhibitor-like protein [Oryza sativa Japonica Group]
LOC_Os02g46910	1056	7	4	35	47	52	66	1.87126	2.02081	up	0.000450233	0.00902159	-	GO:0005618//cell wall;GO:0048046//apoplast;GO:0016023//cytoplasmic, membrane-bounded vesicle	GO:0004553//hydrolase activity, hydrolyzing O-glycosyl compounds;GO:0016762//xyloglucan:xyloglucosyl transferase activity	GO:0071555//cell wall organization;GO:0010411//xyloglucan metabolic process;GO:0042546//cell wall biogenesis	gi|113537345|dbj|BAF09728.1|/0/Os02g0696500 [Oryza sativa Japonica Group]
LOC_Os07g43990	1758	4	7	2	16	16	17	0.27476	2.01871	up	0.00302539	0.0384204	-	GO:0016021//integral component of membrane;GO:0042175//nuclear outer membrane-endoplasmic reticulum membrane network;GO:0005794//Golgi apparatus	GO:0005509//calcium ion binding	-	gi|125559281|gb|EAZ04817.1|/0/hypothetical protein OsI_26994 [Oryza sativa Indica Group]
LOC_Os08g41130	2712	13.63	0	20.17	57.37	25.67	36.85	1.44503	2.01866	up	0.002807	0.0363904	-	-	GO:0008270//zinc ion binding	-	gi|113632167|dbj|BAF25848.1|/0/Os09g0562400 [Oryza sativa Japonica Group]
LOC_Os01g72970	2505	27	18	57	159	65	138	2.98523	2.01496	up	6.45e-06	0.000280533	-	-	-	-	gi|20146230|dbj|BAB89012.1|/0/bzip transcription factor-like [Oryza sativa Japonica Group]
LOC_Os04g50890	822	8	7	6	25	19	33	0.853713	2.01381	up	0.000248149	0.00562472	-	GO:0005886//plasma membrane;GO:0030658//transport vesicle membrane;GO:0016021//integral component of membrane	-	GO:0015031//protein transport	gi|122228346|sp|Q0JAI9.1|SCAM6_ORYSJ/0/RecName: Full=Secretory carrier-associated membrane protein 6; Short=Secretory carrier membrane protein 6
LOC_Os03g06510	8109	41	19	32	151	68	110	2.84741	2.01279	up	4.21e-07	2.7e-05	-	-	-	-	gi|108706311|gb|ABF94106.1|/0/Viral A-type inclusion protein repeat containing protein, expressed [Oryza sativa Japonica Group]
LOC_Os05g45800	6081	9.18	2.01	3.33	12.68	17.56	23.08	0.379893	2.01198	up	0.0037812	0.0457465	ko03440//Homologous recombination;ko00240//Pyrimidine metabolism;ko01100//Metabolic pathways;ko03460//Fanconi anemia pathway;ko02020//Two-component system;ko02010//ABC transporters;ko00670//One carbon pool by folate	GO:0009536//plastid	GO:0004523//RNA-DNA hybrid ribonuclease activity;GO:0003676//nucleic acid binding	GO:0090502//RNA phosphodiester bond hydrolysis, endonucleolytic;GO:0015074//DNA integration	gi|45680421|gb|AAS75222.1|/0/putative polyprotein [Oryza sativa Japonica Group]
LOC_Os09g24850	4086	47	10	73	203	47	201	3.30735	2.00897	up	0.000724815	0.013326	-	-	GO:0003964//RNA-directed DNA polymerase activity;GO:0003677//DNA binding;GO:0003682//chromatin binding;GO:0003723//RNA binding;GO:0004190//aspartic-type endopeptidase activity	GO:0006333//chromatin assembly or disassembly;GO:0006278//RNA-dependent DNA biosynthetic process;GO:0006508//proteolysis;GO:0006310//DNA recombination	gi|78708062|gb|ABB47037.1|/0/retrotransposon protein, putative, unclassified, expressed [Oryza sativa Japonica Group]
LOC_Os04g38680	1368	73	19	228	500	163	442	4.58321	2.00815	up	0.001196	0.0196526	ko05033//Nicotine addiction;ko04721//Synaptic vesicle cycle;ko04727//GABAergic synapse;ko04723//Retrograde endocannabinoid signaling;ko05032//Morphine addiction	GO:0016021//integral component of membrane	GO:0015171//amino acid transmembrane transporter activity	GO:0003333//amino acid transmembrane transport	gi|38344962|emb|CAD40982.2|/0/OSJNBa0072F16.7 [Oryza sativa Japonica Group]
LOC_Os06g17070	1989	8.75	1.26	31.55	59.41	32.39	54.01	1.71341	2.00628	up	0.00206207	0.0290966	ko04978//Mineral absorption;ko03008//Ribosome biogenesis in eukaryotes;ko03018//RNA degradation	GO:0016020//membrane	GO:0046872//metal ion binding	-	gi|77551574|gb|ABA94371.1|/0/retrotransposon protein, putative, Ty1-copia subclass [Oryza sativa Japonica Group]
LOC_Os03g59340	3222	22	16	24	91	61	71	2.29579	2.00443	up	4.62e-08	4.06e-06	-	GO:0005886//plasma membrane;GO:0016021//integral component of membrane	GO:0046872//metal ion binding;GO:0016760//cellulose synthase (UDP-forming) activity	GO:0071555//cell wall organization;GO:0030244//cellulose biosynthetic process	gi|75147119|sp|Q84M43.1|CESA2_ORYSJ/0/RecName: Full=Probable cellulose synthase A catalytic subunit 2 [UDP-forming]; AltName: Full=OsCesA2
LOC_Os03g19462	1773	11	8	11	34	37	38	1.30823	2.00264	up	5.46e-06	0.00024352	-	GO:0005634//nucleus;GO:0005737//cytoplasm	-	-	gi|218197824|gb|EEC80251.1|/0/hypothetical protein OsI_22208 [Oryza sativa Indica Group]
LOC_Os10g36060	2949	8	2	6	20	17	21	0.489012	2.00155	up	0.00203812	0.0289934	-	GO:0005739//mitochondrion	-	-	gi|110289363|gb|AAP54507.2|/0/Chorion family 2 protein, expressed [Oryza sativa Japonica Group]
LOC_Os12g38670	3402	27.4	14.02	18.75	65.62	45.42	103.28	2.24791	1.99943	up	2.84e-06	0.000138166	-	-	GO:0008234//cysteine-type peptidase activity	GO:0006508//proteolysis	gi|77556205|gb|ABA99001.1|/0/transposon protein, putative, CACTA, En/Spm sub-class [Oryza sativa Japonica Group]
LOC_Os01g37750	753	13	9	14	62	30	37	1.54574	1.99871	up	2.28e-05	0.000800933	ko00980//Metabolism of xenobiotics by cytochrome P450;ko05200//Pathways in cancer;ko00480//Glutathione metabolism;ko00982//Drug metabolism - cytochrome P450;ko05215//Prostate cancer	GO:0005737//cytoplasm	GO:0004364//glutathione transferase activity	GO:0009407//toxin catabolic process;GO:0006749//glutathione metabolic process	gi|113532863|dbj|BAF05246.1|/3.33648e-129/Os01g0558100 [Oryza sativa Japonica Group]
LOC_Os08g32160	936	10	12	7	27	25	53	1.26866	1.99575	up	0.0001605	0.00394339	ko00904//Diterpenoid biosynthesis;ko01100//Metabolic pathways;ko01110//Biosynthesis of secondary metabolites	-	GO:0051213//dioxygenase activity;GO:0046872//metal ion binding	GO:0055114//oxidation-reduction process	gi|113623781|dbj|BAF23726.1|/0/Os08g0417000 [Oryza sativa Japonica Group]
LOC_Os03g50510	1809	42	31	46	132	107	184	3.20185	1.99477	up	2.02e-09	2.65e-07	ko00260//Glycine, serine and threonine metabolism;ko00290//Valine, leucine and isoleucine biosynthesis;ko00270//Cysteine and methionine metabolism;ko01100//Metabolic pathways;ko01110//Biosynthesis of secondary metabolites	GO:0005737//cytoplasm	GO:0030170//pyridoxal phosphate binding;GO:0004794//L-threonine ammonia-lyase activity	GO:0009097//isoleucine biosynthetic process	gi|937911134|dbj|BAS86054.1|/0/Os03g0713000 [Oryza sativa Japonica Group]
LOC_Os02g57010	951	19	34	10	77	124	34	2.34546	1.99457	up	0.000117167	0.00305272	ko03040//Spliceosome;ko05130//Pathogenic Escherichia coli infection	GO:0019013//viral nucleocapsid;GO:0030529//intracellular ribonucleoprotein complex	GO:0003676//nucleic acid binding;GO:0000166//nucleotide binding	-	gi|113538031|dbj|BAF10414.1|/2.13868e-166/Os02g0815200 [Oryza sativa Japonica Group]
LOC_Os02g43330	786	47	18	82	226	89	194	3.47476	1.99016	up	1.65e-05	0.000614254	-	GO:0005634//nucleus	GO:0043565//sequence-specific DNA binding;GO:0003700//transcription factor activity, sequence-specific DNA binding	GO:0006355//regulation of transcription, DNA-templated	gi|75123340|sp|Q6H6S3.1|HOX24_ORYSJ/4.09215e-156/RecName: Full=Homeobox-leucine zipper protein HOX24; AltName: Full=HD-ZIP protein HOX24; AltName: Full=Homeodomain transcription factor HOX24; AltName: Full=OsHox24
LOC_Os10g28240	3108	6	7	6	32	10	26	0.705125	1.98526	up	0.00184579	0.0272059	ko00230//Purine metabolism	GO:0009536//plastid;GO:0005887//integral component of plasma membrane	GO:0005388//calcium-transporting ATPase activity;GO:0004672//protein kinase activity;GO:0046872//metal ion binding;GO:0005524//ATP binding	GO:0006468//protein phosphorylation;GO:0070588//calcium ion transmembrane transport	gi|1002299332|ref|XP_015613068.1|/0/PREDICTED: putative calcium-transporting ATPase 13, plasma membrane-type [Oryza sativa Japonica Group]
LOC_Os01g62670	1548	17	5	10	46	26	41	1.36951	1.98281	up	9.03e-05	0.00246746	-	-	-	-	gi|125528361|gb|EAY76475.1|/0/hypothetical protein OsI_04412 [Oryza sativa Indica Group]
LOC_Os08g40680	894	8	10	11	39	35	30	1.25055	1.97901	up	1.21e-05	0.0004745	ko00500//Starch and sucrose metabolism;ko00520//Amino sugar and nucleotide sugar metabolism;ko01100//Metabolic pathways;ko01110//Biosynthesis of secondary metabolites	GO:0005576//extracellular region;GO:0016023//cytoplasmic, membrane-bounded vesicle	GO:0004568//chitinase activity;GO:0008061//chitin binding	GO:0006032//chitin catabolic process;GO:0006952//defense response;GO:0045493//xylan catabolic process	gi|1002287724|ref|XP_015648171.1|/0/PREDICTED: xylanase inhibitor protein 2-like [Oryza sativa Japonica Group]
LOC_Os10g42690	2577	71	59	144	357	200	394	4.366	1.97888	up	6.93e-08	5.83e-06	-	GO:0000792//heterochromatin;GO:0005634//nucleus	GO:0032454//histone demethylase activity (H3-K9 specific);GO:0046872//metal ion binding;GO:0051213//dioxygenase activity	GO:0045815//positive regulation of gene expression, epigenetic;GO:0055114//oxidation-reduction process;GO:0006355//regulation of transcription, DNA-templated;GO:0033169//histone H3-K9 demethylation;GO:0048439//flower morphogenesis	gi|122212059|sp|Q336N8.1|JM706_ORYSJ/0/RecName: Full=Lysine-specific demethylase JMJ706; AltName: Full=Jumonji domain-containing protein 706; AltName: Full=Lysine-specific histone demethylase JMJ706; AltName: Full=Protein JUMONJI 706
LOC_Os01g32780	504	87	32	162	462	151	347	4.38597	1.97882	up	5.05e-05	0.00153324	-	-	-	GO:0006950//response to stress	gi|113532701|dbj|BAF05084.1|/9.3622e-88/Os01g0511100 [Oryza sativa Japonica Group]
LOC_Os11g44430	1614	6	6	12	32	13	39	0.98305	1.96939	up	0.000783051	0.0142195	ko05142//Chagas disease (American trypanosomiasis);ko05133//Pertussis;ko05145//Toxoplasmosis;ko04626//Plant-pathogen interaction;ko04722//Neurotrophin signaling pathway;ko05162//Measles;ko04620//Toll-like receptor signaling pathway;ko05164//Influenza A;ko05140//Leishmaniasis;ko05152//Tuberculosis;ko04064//NF-kappa B signaling pathway;ko04210//Apoptosis	-	GO:0005524//ATP binding;GO:0004674//protein serine/threonine kinase activity	GO:0006468//protein phosphorylation	gi|77552359|gb|ABA95156.1|/0/Protein kinase domain containing protein, expressed [Oryza sativa Japonica Group]
LOC_Os08g43320	972	12	11	8	28	52	31	1.33039	1.96206	up	2.74e-05	0.000934786	-	GO:0016020//membrane	GO:0004252//serine-type endopeptidase activity	GO:0016485//protein processing	gi|113624391|dbj|BAF24336.1|/3.90587e-161/Os08g0546700 [Oryza sativa Japonica Group]
LOC_Os01g32364	1551	18	38	15	138	72	43	2.48092	1.9594	up	0.000101452	0.00271332	ko00500//Starch and sucrose metabolism;ko00940//Phenylpropanoid biosynthesis;ko00460//Cyanoamino acid metabolism;ko01100//Metabolic pathways;ko01110//Biosynthesis of secondary metabolites	GO:0016023//cytoplasmic, membrane-bounded vesicle	GO:0102483//scopolin beta-glucosidase activity;GO:0008422//beta-glucosidase activity	GO:0005975//carbohydrate metabolic process;GO:1901657//glycosyl compound metabolic process	gi|75251390|sp|Q5QMT0.1|BGL01_ORYSJ/0/RecName: Full=Beta-glucosidase 1; Short=Os1bglu1; Flags: Precursor
LOC_Os07g01860	3270	8	7	10	31	25	32	1.03611	1.95914	up	4.57e-05	0.00142111	-	-	-	GO:0051513//regulation of monopolar cell growth	gi|113610259|dbj|BAF20637.1|/0/Os07g0109400 [Oryza sativa Japonica Group]
LOC_Os01g71340	993	22	82	52	120	213	224	3.58695	1.95523	up	3.36e-06	0.000160083	-	GO:0046658//anchored component of plasma membrane;GO:0016023//cytoplasmic, membrane-bounded vesicle	GO:0004553//hydrolase activity, hydrolyzing O-glycosyl compounds;GO:0030247//polysaccharide binding	GO:0005975//carbohydrate metabolic process	gi|4884526|dbj|BAA77783.1|/0/beta 1,3-glucanase [Oryza sativa]
LOC_Os02g55890	2289	8	9	23	35	41	63	1.65059	1.95511	up	4.34e-05	0.00135634	ko00190//Oxidative phosphorylation	GO:0016021//integral component of membrane;GO:0016023//cytoplasmic, membrane-bounded vesicle	GO:0009678//hydrogen-translocating pyrophosphatase activity;GO:0004427//inorganic diphosphatase activity	GO:0055085//transmembrane transport;GO:0015992//proton transport	gi|38488588|dbj|BAD02276.1|/0/vacuolar proton pyrophosphatase [Oryza sativa Japonica Group]
LOC_Os01g12430	2418	27	10	25	69	41	102	2.24383	1.95235	up	1.95e-05	0.000705247	ko00903//Limonene and pinene degradation;ko05142//Chagas disease (American trypanosomiasis);ko05133//Pertussis;ko05145//Toxoplasmosis;ko04626//Plant-pathogen interaction;ko00642//Ethylbenzene degradation;ko00362//Benzoate degradation;ko04075//Plant hormone signal transduction;ko04722//Neurotrophin signaling pathway;ko05162//Measles;ko00240//Pyrimidine metabolism;ko00051//Fructose and mannose meta…	GO:0016021//integral component of membrane;GO:0016023//cytoplasmic, membrane-bounded vesicle;GO:0005886//plasma membrane	GO:0004674//protein serine/threonine kinase activity;GO:0005524//ATP binding	GO:0006468//protein phosphorylation;GO:0048544//recognition of pollen	gi|255673013|dbj|BAF04363.2|/0/Os01g0224000 [Oryza sativa Japonica Group]
LOC_Os02g37910	1365	15	14	23	89	34	56	2.00946	1.95011	up	2.15e-05	0.000763336	ko00790//Folate biosynthesis;ko01120//Microbial metabolism in diverse environments;ko01100//Metabolic pathways;ko00627//Aminobenzoate degradation;ko02020//Two-component system	GO:0016021//integral component of membrane;GO:0016023//cytoplasmic, membrane-bounded vesicle	-	-	gi|50726474|dbj|BAD34083.1|/0/phosphodiesterase/alkaline phosphatase D-like protein [Oryza sativa Japonica Group]
LOC_Os03g18910	2016	24	10	23	86	39	70	2.12722	1.94902	up	1.08e-05	0.000433959	-	GO:0031225//anchored component of membrane;GO:0016021//integral component of membrane;GO:0016023//cytoplasmic, membrane-bounded vesicle	-	GO:0010215//cellulose microfibril organization;GO:0016049//cell growth	gi|937908849|dbj|BAS83769.1|/0/Os03g0301200 [Oryza sativa Japonica Group]
LOC_Os06g48240	1527	8	6	5	17	23	27	0.67952	1.94713	up	0.000680097	0.0126494	-	-	GO:0000166//nucleotide binding	-	gi|53793232|dbj|BAD54457.1|/0/AAA ATPase-like [Oryza sativa Japonica Group]
LOC_Os11g24510	1440	147	174	197	580	627	589	5.26914	1.94236	up	1.11e-14	4.34e-12	ko00940//Phenylpropanoid biosynthesis;ko04142//Lysosome;ko04614//Renin-angiotensin system	GO:0016023//cytoplasmic, membrane-bounded vesicle	GO:0004185//serine-type carboxypeptidase activity;GO:0016747//transferase activity, transferring acyl groups other than amino-acyl groups	GO:0019748//secondary metabolic process;GO:0051603//proteolysis involved in cellular protein catabolic process	gi|108864332|gb|ABA93121.2|;gi|108864333|gb|ABG22468.1|/0;0/Serine carboxypeptidase family protein, expressed [Oryza sativa Japonica Group];Serine carboxypeptidase family protein, expressed [Oryza sativa Japonica Group]
LOC_Os04g33390	1311	9	19	5	31	40	46	1.41663	1.94145	up	0.0001591	0.00391701	ko00400//Phenylalanine, tyrosine and tryptophan biosynthesis;ko01100//Metabolic pathways;ko01110//Biosynthesis of secondary metabolites	GO:0009570//chloroplast stroma	GO:0047769//arogenate dehydratase activity;GO:0004664//prephenate dehydratase activity;GO:0016597//amino acid binding	GO:0009094//L-phenylalanine biosynthetic process	gi|113564287|dbj|BAF14630.1|/0/Os04g0406600 [Oryza sativa Japonica Group]
LOC_Os01g42410	4332	420	309	1053	2388	1405	2193	7.01684	1.94	up	9.05e-07	5.21e-05	ko03040//Spliceosome;ko04976//Bile secretion;ko02010//ABC transporters	GO:0005886//plasma membrane;GO:0016021//integral component of membrane	GO:0042626//ATPase activity, coupled to transmembrane movement of substances;GO:0005524//ATP binding	GO:0055085//transmembrane transport	gi|75328829|sp|Q8GU89.1|AB37G_ORYSJ/0/RecName: Full=ABC transporter G family member 37; Short=OsABCG37; AltName: Full=Pleiotropic drug resistance protein 8; Short=OsPDR8
LOC_Os04g02620	960	11	13	6	40	45	21	1.27685	1.93954	up	0.000140909	0.00355536	ko00140//Steroid hormone biosynthesis;ko01100//Metabolic pathways;ko01040//Biosynthesis of unsaturated fatty acids;ko01110//Biosynthesis of secondary metabolites;ko00062//Fatty acid elongation	GO:0016021//integral component of membrane	-	GO:0044699	gi|38344108|emb|CAE01715.2|/0/OSJNBb0050O03.5 [Oryza sativa Japonica Group]
LOC_Os02g49230	1362	25	23	34	116	50	113	2.63345	1.93708	up	2.17e-06	0.000110179	ko04712//Circadian rhythm - plant	GO:0005622//intracellular	GO:0008270//zinc ion binding;GO:0003677//DNA binding	-	gi|222623584|gb|EEE57716.1|;gi|1002246501|ref|XP_015627429.1|/0;0/hypothetical protein OsJ_08199 [Oryza sativa Japonica Group];PREDICTED: zinc finger protein CONSTANS-LIKE 9 isoform X2 [Oryza sativa Japonica Group]
LOC_Os03g62090	3279	16	16	17	70	46	53	1.92516	1.93605	up	8.89e-07	5.14e-05	-	GO:0005886//plasma membrane;GO:0016021//integral component of membrane	GO:0016760//cellulose synthase (UDP-forming) activity;GO:0008270//zinc ion binding	GO:0071555//cell wall organization;GO:0030244//cellulose biosynthetic process	gi|75328327|sp|Q851L8.1|CESA5_ORYSJ/0/RecName: Full=Probable cellulose synthase A catalytic subunit 5 [UDP-forming]; AltName: Full=OsCesA5
LOC_Os01g25650	5088	11.36	2	7.42	25.05	15.77	30.28	0.766457	1.93604	up	0.00167113	0.025193	ko03440//Homologous recombination;ko00240//Pyrimidine metabolism;ko01100//Metabolic pathways;ko03460//Fanconi anemia pathway;ko02020//Two-component system;ko02010//ABC transporters;ko00670//One carbon pool by folate	-	GO:0003824//catalytic activity	GO:0006259//DNA metabolic process	gi|77555168|gb|ABA97964.1|/0/retrotransposon protein, putative, unclassified [Oryza sativa Japonica Group]
LOC_Os10g28120	867	38	15	37	110	71	123	2.74904	1.93226	up	7.11e-07	4.2e-05	-	GO:0005576//extracellular region	GO:0004568//chitinase activity;GO:0008061//chitin binding	GO:0005975//carbohydrate metabolic process;GO:0006032//chitin catabolic process	gi|113639217|dbj|BAF26522.1|/0/Os10g0416800 [Oryza sativa Japonica Group]
LOC_Os03g17700	1110	26	40	24	112	68	129	2.77592	1.92672	up	6.66e-07	4e-05	ko05218//Melanoma;ko05160//Hepatitis C;ko05211//Renal cell carcinoma;ko04540//Gap junction;ko04725//Cholinergic synapse;ko04360//Axon guidance;ko04916//Melanogenesis;ko05142//Chagas disease (American trypanosomiasis);ko04270//Vascular smooth muscle contraction;ko05133//Pertussis;ko04062//Chemokine signaling pathway;ko05145//Toxoplasmosis;ko05221//Acute myeloid leukemia;ko04320//Dorso-ventral axis…	GO:0005622//intracellular	GO:0004707//MAP kinase activity;GO:0005524//ATP binding	GO:0010120//camalexin biosynthetic process;GO:0000169//activation of MAPK activity involved in osmosensory signaling pathway;GO:0010183//pollen tube guidance;GO:0048481//plant ovule development;GO:0010224//response to UV-B;GO:0009555//pollen development;GO:0010229//inflorescence development;GO:0006952//defense response;GO:0080136//priming of cellular response to stress	gi|122247193|sp|Q10N20.1|MPK5_ORYSJ/0/RecName: Full=Mitogen-activated protein kinase 5; Short=MAP kinase 5; AltName: Full=Benzothiadiazole-induced MAP kinase 1; AltName: Full=MAP kinase 2; AltName: Full=Multiple stress-responsive MAP kinase 2; AltName: Full=OsBIMK1; AltName: Full=OsMAP1; AltName: Full=OsMAPK2; AltName: Full=OsMAPK5; AltName: Full=OsMPK3; AltName: Full=OsMSRMK2
LOC_Os08g45030	4035	30	19	50	105	85	143	2.87709	1.92371	up	3.84e-07	2.51e-05	ko04976//Bile secretion;ko02010//ABC transporters	GO:0016021//integral component of membrane;GO:0009506//plasmodesma;GO:0005886//plasma membrane	GO:0010328//auxin influx transmembrane transporter activity;GO:0010329//auxin efflux transmembrane transporter activity;GO:0042626//ATPase activity, coupled to transmembrane movement of substances;GO:0005524//ATP binding	GO:0009958//positive gravitropism;GO:0060919//auxin influx;GO:0043481//anthocyanin accumulation in tissues in response to UV light;GO:0009640//photomorphogenesis;GO:0008361//regulation of cell size;GO:0010315//auxin efflux;GO:0009637//response to blue light;GO:0009926//auxin polar transport;GO:0055085//transmembrane transport;GO:0048443//stamen development	gi|937931822|dbj|BAT06738.1|/0/Os08g0564300 [Oryza sativa Japonica Group]
LOC_Os11g01740	1539	3	7.78	10.38	23.99	24.09	25.11	0.799182	1.92237	up	0.000532531	0.0103884	ko05142//Chagas disease (American trypanosomiasis);ko05133//Pertussis;ko05145//Toxoplasmosis;ko04626//Plant-pathogen interaction;ko04722//Neurotrophin signaling pathway;ko05162//Measles;ko04620//Toll-like receptor signaling pathway;ko05164//Influenza A;ko05140//Leishmaniasis;ko05152//Tuberculosis;ko04064//NF-kappa B signaling pathway;ko04210//Apoptosis	GO:0016021//integral component of membrane	GO:0005524//ATP binding;GO:0004674//protein serine/threonine kinase activity	GO:0006468//protein phosphorylation	gi|108863918|gb|ABA91125.2|/0/Protein kinase domain containing protein, expressed [Oryza sativa Japonica Group]
LOC_Os08g38990	2025	7	12	21	50	37	49	1.63036	1.91844	up	1.88e-05	0.000687304	ko04626//Plant-pathogen interaction	-	GO:0043565//sequence-specific DNA binding;GO:0003700//transcription factor activity, sequence-specific DNA binding	GO:0006355//regulation of transcription, DNA-templated	gi|58042751|gb|AAW63719.1|/0/WRKY30 [Oryza sativa Japonica Group]
LOC_Os06g47200	453	35	25	30	119	76	109	2.75079	1.91694	up	2.82e-08	2.7e-06	-	GO:0016023//cytoplasmic, membrane-bounded vesicle;GO:0016021//integral component of membrane	-	-	gi|1002273280|ref|XP_015640951.1|;gi|113596440|dbj|BAF20314.1|/5.2738e-70;1.23819e-63/PREDICTED: lipid transfer-like protein VAS [Oryza sativa Japonica Group];Os06g0686400 [Oryza sativa Japonica Group]
LOC_Os10g39700	537	32	7	14	49	62	68	2.0012	1.91523	up	2.73e-05	0.000931496	ko00500//Starch and sucrose metabolism;ko00520//Amino sugar and nucleotide sugar metabolism;ko01100//Metabolic pathways;ko01110//Biosynthesis of secondary metabolites	GO:0016023//cytoplasmic, membrane-bounded vesicle	GO:0004568//chitinase activity	GO:0006032//chitin catabolic process;GO:0000272//polysaccharide catabolic process;GO:0016998//cell wall macromolecule catabolic process	gi|937936969|dbj|BAT11883.1|/6.74866e-85/Os10g0543400, partial [Oryza sativa Japonica Group]
LOC_Os07g32630	1458	3	7	9	19	30	17	0.658943	1.9135	up	0.00140984	0.0223801	-	GO:0043231//intracellular membrane-bounded organelle	GO:0080043//quercetin 3-O-glucosyltransferase activity;GO:0080044//quercetin 7-O-glucosyltransferase activity	GO:0009813//flavonoid biosynthetic process;GO:0052696//flavonoid glucuronidation	gi|113611291|dbj|BAF21669.1|/0/Os07g0510500 [Oryza sativa Japonica Group]
LOC_Os04g43650	1119	56	79	29	142	245	183	3.62299	1.91348	up	1.84e-07	1.37e-05	ko00260//Glycine, serine and threonine metabolism;ko00310//Lysine degradation;ko01120//Microbial metabolism in diverse environments;ko01100//Metabolic pathways;ko02020//Two-component system;ko01110//Biosynthesis of secondary metabolites;ko00020//Citrate cycle (TCA cycle)	GO:0005829//cytosol	GO:0008732//L-allo-threonine aldolase activity	GO:0006567//threonine catabolic process;GO:0006545//glycine biosynthetic process	gi|38344656|emb|CAD41482.2|/0/OSJNBb0072M01.18 [Oryza sativa Japonica Group]
LOC_Os09g18159	2028	15	21	13	40	81	49	1.91924	1.91331	up	6.43e-06	0.000280504	ko05142//Chagas disease (American trypanosomiasis);ko05133//Pertussis;ko05145//Toxoplasmosis;ko04626//Plant-pathogen interaction;ko04722//Neurotrophin signaling pathway;ko05162//Measles;ko04620//Toll-like receptor signaling pathway;ko05164//Influenza A;ko05140//Leishmaniasis;ko05152//Tuberculosis;ko04064//NF-kappa B signaling pathway;ko04210//Apoptosis	GO:0016021//integral component of membrane;GO:0016023//cytoplasmic, membrane-bounded vesicle	GO:0005524//ATP binding;GO:0004674//protein serine/threonine kinase activity	GO:0006468//protein phosphorylation	gi|1002294781|ref|XP_015610826.1|/0/PREDICTED: probable leucine-rich repeat receptor-like protein kinase At2g28990 isoform X2 [Oryza sativa Japonica Group]
LOC_Os10g31330	645	30	47	45	117	126	171	3.18376	1.90933	up	4.63e-09	5.55e-07	-	-	-	-	gi|1002302061|ref|XP_015614412.1|/3.5382e-35/PREDICTED: glycine-rich cell wall structural protein 2 [Oryza sativa Japonica Group]
LOC_Os05g07940	587	109	37	147	304	178	476	4.39421	1.90824	up	1.51e-05	0.000570434	-	-	GO:0016829//lyase activity	-	gi|113578327|dbj|BAF16690.1|;gi|937917577|dbj|BAS92495.1|/4.6764e-132;1.22357e-74/Os05g0171900 [Oryza sativa Japonica Group];Os05g0171900 [Oryza sativa Japonica Group]
LOC_Os03g12820	1392	199	40	324	689	284	847	5.31935	1.90794	up	0.000497552	0.00975569	-	-	GO:0003950//NAD+ ADP-ribosyltransferase activity	-	gi|108706982|gb|ABF94777.1|/0/Poly polymerase catalytic domain containing protein, expressed [Oryza sativa Japonica Group]
LOC_Os02g17400	2883	11	14	25	62	21	83	1.9206	1.90635	up	0.000355259	0.00745344	ko04626//Plant-pathogen interaction	GO:0016021//integral component of membrane;GO:0016023//cytoplasmic, membrane-bounded vesicle	-	-	gi|1002242802|ref|XP_015625623.1|/0/PREDICTED: probable LRR receptor-like serine/threonine-protein kinase At4g36180 [Oryza sativa Japonica Group]
LOC_Os05g42330	834	10	12	5	30	36	27	1.11271	1.90592	up	0.000127826	0.00328578	-	GO:0005886//plasma membrane;GO:0030658//transport vesicle membrane;GO:0016021//integral component of membrane	-	GO:0015031//protein transport	gi|75113853|sp|Q60EA5.1|SCAM3_ORYSJ/2.81629e-178/RecName: Full=Secretory carrier-associated membrane protein 3; Short=Secretory carrier membrane protein 3
LOC_Os07g46990	459	144	133	133	594	312	464	4.90312	1.90393	up	1.93e-10	3.47e-08	ko04146//Peroxisome;ko05016//Huntington's disease;ko05020//Prion diseases;ko05014//Amyotrophic lateral sclerosis (ALS)	GO:0005737//cytoplasm	GO:0046872//metal ion binding;GO:0004784//superoxide dismutase activity	GO:0019430//removal of superoxide radicals;GO:0055114//oxidation-reduction process	gi|937928181|dbj|BAT03098.1|/6.92953e-105/Os07g0665200, partial [Oryza sativa Japonica Group]
LOC_Os03g62230	1158	5	6	15	20	31	37	1.04173	1.90378	up	0.000447523	0.0090138	-	-	-	-	gi|255675036|dbj|BAH92434.1|/0/Os03g0838800 [Oryza sativa Japonica Group]
LOC_Os10g33540	1788	8	9	7	40	27	15	0.951059	1.9034	up	0.00077317	0.0140801	-	GO:0016021//integral component of membrane	GO:0050660//flavin adenine dinucleotide binding;GO:0046577//long-chain-alcohol oxidase activity	GO:0055114//oxidation-reduction process	gi|110289246|gb|ABB47786.2|/0/GMC oxidoreductase family protein, expressed [Oryza sativa Japonica Group]
LOC_Os06g49350	6657	4.71	9.2	6.43	16.28	17.3	35.9	0.741692	1.90318	up	0.00158755	0.0243738	ko00230//Purine metabolism;ko05166//HTLV-I infection;ko04623//Cytosolic DNA-sensing pathway;ko04115//p53 signaling pathway;ko05016//Huntington's disease;ko00900//Terpenoid backbone biosynthesis;ko05169//Epstein-Barr virus infection;ko00240//Pyrimidine metabolism;ko04110//Cell cycle;ko00908//Zeatin biosynthesis;ko05202//Transcriptional misregulation in cancer;ko01100//Metabolic pathways;ko03008//R…	-	GO:0008270//zinc ion binding;GO:0003676//nucleic acid binding	GO:0015074//DNA integration	gi|77553001|gb|ABA95797.1|/0/retrotransposon protein, putative, unclassified [Oryza sativa Japonica Group]
LOC_Os09g26660	3024	46	52	69	241	159	159	3.61397	1.901	up	8.46e-10	1.28e-07	ko04626//Plant-pathogen interaction	GO:0016021//integral component of membrane	GO:0050664//oxidoreductase activity, acting on NAD(P)H, oxygen as acceptor;GO:0004601//peroxidase activity;GO:0005509//calcium ion binding	GO:0098869//cellular oxidant detoxification;GO:0055114//oxidation-reduction process	gi|113631500|dbj|BAF25181.1|/0/Os09g0438000 [Oryza sativa Japonica Group]
LOC_Os08g26840	1641	5	39	16	44	107	60	2.21648	1.90092	up	0.000873478	0.0154519	-	GO:0016021//integral component of membrane	-	-	gi|113623591|dbj|BAF23536.1|/0/Os08g0356700 [Oryza sativa Japonica Group]
LOC_Os06g42380	3342	14	6	7	18	15	57	1.08745	1.90047	up	0.00284901	0.0367488	ko03013//RNA transport;ko03008//Ribosome biogenesis in eukaryotes;ko03018//RNA degradation	-	-	-	gi|222635925|gb|EEE66057.1|/0/hypothetical protein OsJ_22054 [Oryza sativa Japonica Group]
LOC_Os02g17750	3333	10.09	6.71	1.96	23.55	18.94	21.54	0.634013	1.89949	up	0.00261762	0.0346414	-	-	GO:0003677//DNA binding;GO:0008234//cysteine-type peptidase activity	GO:0006508//proteolysis	gi|53749409|gb|AAU90267.1|/0/Transposase family protein [Oryza sativa Japonica Group]
LOC_Os02g48870	1392	11	38	25	49	61	141	2.48694	1.89839	up	0.000211927	0.00498028	ko00903//Limonene and pinene degradation;ko00642//Ethylbenzene degradation;ko00362//Benzoate degradation;ko00240//Pyrimidine metabolism;ko00051//Fructose and mannose metabolism;ko01120//Microbial metabolism in diverse environments;ko01100//Metabolic pathways;ko00627//Aminobenzoate degradation;ko00350//Tyrosine metabolism	GO:0016023//cytoplasmic, membrane-bounded vesicle	GO:0004190//aspartic-type endopeptidase activity	GO:0030163//protein catabolic process;GO:0006508//proteolysis	gi|113537485|dbj|BAF09868.1|/0/Os02g0720600 [Oryza sativa Japonica Group]
LOC_Os01g04330	546	84	17	59	248	55	213	3.52182	1.8957	up	0.000528394	0.0103182	ko04626//Plant-pathogen interaction	-	GO:0005509//calcium ion binding	-	gi|75322067|sp|Q5ZCK5.1|CML16_ORYSJ/6.24251e-118/RecName: Full=Probable calcium-binding protein CML16; AltName: Full=Calmodulin-like protein 16
LOC_Os07g48170	3021	8	5	13	45	17	24	1.0263	1.88943	up	0.00104464	0.0176875	-	GO:0009536//plastid	-	-	gi|1002284950|ref|XP_015646775.1|/0/PREDICTED: uncharacterized protein LOC4344291 [Oryza sativa Japonica Group]
LOC_Os01g04580	2052	17	10	11	39	30	57	1.53635	1.88469	up	5.17e-05	0.00155795	ko05142//Chagas disease (American trypanosomiasis);ko05133//Pertussis;ko05145//Toxoplasmosis;ko04626//Plant-pathogen interaction;ko04075//Plant hormone signal transduction;ko04722//Neurotrophin signaling pathway;ko05162//Measles;ko04620//Toll-like receptor signaling pathway;ko05164//Influenza A;ko05140//Leishmaniasis;ko05152//Tuberculosis;ko04064//NF-kappa B signaling pathway;ko04210//Apoptosis	GO:0016021//integral component of membrane	GO:0030247//polysaccharide binding;GO:0005524//ATP binding;GO:0004674//protein serine/threonine kinase activity	GO:0006468//protein phosphorylation	gi|113531501|dbj|BAF03884.1|/0/Os01g0138400 [Oryza sativa Japonica Group]
LOC_Os04g40040	2517	150	155	213	459	556	693	5.21331	1.87823	up	6.18e-12	1.45e-09	ko00260//Glycine, serine and threonine metabolism;ko00360//Phenylalanine metabolism;ko01100//Metabolic pathways;ko00950//Isoquinoline alkaloid biosynthesis;ko00410//beta-Alanine metabolism;ko00350//Tyrosine metabolism;ko00960//Tropane, piperidine and pyridine alkaloid biosynthesis;ko01110//Biosynthesis of secondary metabolites	GO:0005777//peroxisome	GO:0008131//primary amine oxidase activity;GO:0005507//copper ion binding;GO:0048038//quinone binding	GO:0009308//amine metabolic process;GO:0055114//oxidation-reduction process	gi|125590732|gb|EAZ31082.1|/0/hypothetical protein OsJ_15179 [Oryza sativa Japonica Group]
LOC_Os03g43990	1875	10	16	16	47	59	35	1.67549	1.87728	up	9.11e-06	0.000377364	-	-	-	-	gi|108710041|gb|ABF97836.1|;gi|1002257650|ref|XP_015633150.1|/0;0/transposon protein, putative, Mutator sub-class, expressed [Oryza sativa Japonica Group];PREDICTED: BTB/POZ domain-containing protein At1g30440-like [Oryza sativa Japonica Group]
LOC_Os11g04720	606	54.53	49.48	47.03	216.3	165.62	117.45	3.45394	1.87366	up	2.3e-09	2.93e-07	ko04075//Plant hormone signal transduction	GO:0005634//nucleus	GO:0000156//phosphorelay response regulator activity	GO:0000160//phosphorelay signal transduction system;GO:0009736//cytokinin-activated signaling pathway;GO:0006355//regulation of transcription, DNA-templated	gi|122220165|sp|Q4GZK2.1|ORR9_ORYSI;gi|937937723|dbj|BAT12636.1|/2.67469e-124;5.50092e-130/RecName: Full=Two-component response regulator ORR9; AltName: Full=Type A response regulator 9; Short=OsRR9;Os11g0143300 [Oryza sativa Japonica Group]
LOC_Os07g38610	1071	10	10	3	30	22	25	0.878735	1.87168	up	0.000860288	0.0153032	-	GO:0000139//Golgi membrane;GO:0016021//integral component of membrane	GO:0005351//sugar:proton symporter activity	GO:0008643//carbohydrate transport;GO:0015992//proton transport	gi|75136421|sp|Q6ZL17.1|CSTR2_ORYSJ/0/RecName: Full=CMP-sialic acid transporter 2; Short=CMP-SA-Tr 2; Short=CMP-Sia-Tr 2; AltName: Full=CMP-sialic acid transporter-like protein 2; Short=OsCSTLP2
LOC_Os07g48460	1203	14	38	34	72	116	99	2.66466	1.86719	up	1.93e-06	9.97e-05	-	-	-	-	gi|1002286368|ref|XP_015647488.1|/0/PREDICTED: uncharacterized protein LOC4344318 [Oryza sativa Japonica Group]
LOC_Os02g36210	2403	83	192	104	331	750	212	4.7851	1.86379	up	1.65e-05	0.000614254	ko00904//Diterpenoid biosynthesis;ko01100//Metabolic pathways;ko01110//Biosynthesis of secondary metabolites	GO:0009536//plastid	GO:0010333//terpene synthase activity;GO:0051498//syn-copalyl diphosphate synthase activity;GO:0009905//ent-copalyl diphosphate synthase activity;GO:0000287//magnesium ion binding	GO:0006952//defense response;GO:0051504//diterpene phytoalexin precursor biosynthetic process pathway;GO:0009685//gibberellin metabolic process	gi|75133919|sp|Q6Z5I0.1|CPS2_ORYSJ/0/RecName: Full=Ent-copalyl diphosphate synthase 2; Short=Ent-CDP synthase 2; Short=OsCPS2; Short=OsCPS2ent; AltName: Full=Ent-kaurene synthase A; AltName: Full=OsCyc2
LOC_Os05g30980	1401	37	17	46	152	64	104	2.84015	1.86086	up	8.83e-06	0.000369034	-	GO:0019013//viral nucleocapsid;GO:0030529//intracellular ribonucleoprotein complex	GO:0003723//RNA binding;GO:0000166//nucleotide binding	-	gi|255676313|dbj|BAF17281.2|;gi|937918792|dbj|BAS93710.1|/0;0/Os05g0373400 [Oryza sativa Japonica Group];Os05g0373400 [Oryza sativa Japonica Group]
LOC_Os05g13940	1251	27	21	22	117	46	64	2.35778	1.86004	up	1.19e-05	0.000470085	-	-	-	-	-
LOC_Os05g04740	1528	3	7	8	26	22	12	0.554185	1.85971	up	0.00390343	0.0466369	ko04626//Plant-pathogen interaction;ko04075//Plant hormone signal transduction;ko04712//Circadian rhythm - plant	GO:0005634//nucleus	GO:0005515//protein binding	GO:0080113//regulation of seed growth;GO:0009987//cellular process	gi|1002267916|ref|XP_015638281.1|;gi|378924999|dbj|BAL63287.1|/0;1.16391e-165/PREDICTED: transcription factor APG isoform X1 [Oryza sativa Japonica Group];basic helix-loop-helix protein APG [Oryza sativa Japonica Group]
LOC_Os03g32420	963	19	10	21	38	51	72	1.87259	1.84453	up	1.48e-05	0.0005626	-	-	-	-	gi|108709035|gb|ABF96830.1|/1.54211e-118/expressed protein [Oryza sativa Japonica Group]
LOC_Os03g53950	1443	12	12	7	23	41	38	1.24666	1.84444	up	0.000103464	0.00274523	ko03420//Nucleotide excision repair;ko01100//Metabolic pathways;ko03430//Mismatch repair;ko01110//Biosynthesis of secondary metabolites;ko03030//DNA replication;ko00901//Indole alkaloid biosynthesis	GO:0016020//membrane;GO:0005783//endoplasmic reticulum;GO:0005739//mitochondrion	GO:0016788//hydrolase activity, acting on ester bonds;GO:0016844//strictosidine synthase activity	GO:0009058//biosynthetic process	gi|108711104|gb|ABF98899.1|/0/Strictosidine synthase family protein, expressed [Oryza sativa Japonica Group]
LOC_Os04g47700	2106	7	5	17	47	14	31	1.12957	1.84128	up	0.00252134	0.0336693	-	-	-	-	gi|38345401|emb|CAE03092.2|/0/OSJNBa0017B10.7 [Oryza sativa Japonica Group]
LOC_Os01g08500	1287	4.1	14.08	3.45	19.19	27.1	25.6	0.790493	1.83354	up	0.003306	0.0411661	-	GO:0005840//ribosome	GO:0016788//hydrolase activity, acting on ester bonds	-	gi|55296123|dbj|BAD67842.1|/0/ribosomal protein -like [Oryza sativa Japonica Group]
LOC_Os09g24210	2013	9	15	12	30	55	33	1.43919	1.83314	up	5.67e-05	0.00168523	-	-	-	-	gi|113631368|dbj|BAF25049.1|/0/Os09g0407300 [Oryza sativa Japonica Group]
LOC_Os01g50820	1551	8	5	5	16	27	16	0.532281	1.83253	up	0.00301602	0.0383582	-	GO:0005886//plasma membrane;GO:0016021//integral component of membrane	GO:0005515//protein binding	GO:0042128//nitrate assimilation;GO:0015706//nitrate transport;GO:0055085//transmembrane transport	gi|75250246|sp|Q94JG1.1|NRT23_ORYSJ/0/RecName: Full=High-affinity nitrate transporter 2.3; Short=OsNRT2.3
LOC_Os05g40010	390	10	11	7	31	31	29	1.10241	1.83203	up	0.000109602	0.002887	-	GO:0016023//cytoplasmic, membrane-bounded vesicle	GO:0008289//lipid binding	GO:0006869//lipid transport	gi|255676445|dbj|BAF17758.2|/2.81675e-54/Os05g0477900 [Oryza sativa Japonica Group]
LOC_Os07g03060	1542	8	4	9	11	28	29	0.716256	1.83135	up	0.00218646	0.0304103	-	-	-	-	gi|113610328|dbj|BAF20706.1|/0/Os07g0122300 [Oryza sativa Japonica Group]
LOC_Os02g14900	4101	23	13	34	85	71	65	2.31591	1.82081	up	1.25e-06	6.78e-05	-	-	-	-	gi|1002245567|ref|XP_015626965.1|/0/PREDICTED: putative callose synthase 8 isoform X4 [Oryza sativa Japonica Group]
LOC_Os07g16400	5601	16.45	8.09	8.2	35.61	21.61	45.97	1.28391	1.81378	up	0.000399481	0.0082282	ko03440//Homologous recombination;ko00240//Pyrimidine metabolism;ko01100//Metabolic pathways;ko03460//Fanconi anemia pathway;ko02020//Two-component system;ko02010//ABC transporters;ko00670//One carbon pool by folate	-	GO:0003964//RNA-directed DNA polymerase activity;GO:0003677//DNA binding;GO:0003723//RNA binding;GO:0004190//aspartic-type endopeptidase activity;GO:0008270//zinc ion binding	GO:0006278//RNA-dependent DNA biosynthetic process;GO:0006508//proteolysis;GO:0015074//DNA integration;GO:0006310//DNA recombination	gi|108862586|gb|ABG22001.1|/0/retrotransposon protein, putative, Ty3-gypsy subclass [Oryza sativa Japonica Group]
LOC_Os03g21270	3222	55	217	68	444	375	287	4.60354	1.80676	up	6.94e-05	0.00199561	-	-	-	-	gi|108707956|gb|ABF95751.1|/0/expressed protein [Oryza sativa Japonica Group]
LOC_Os05g47540	1488	62	84	14	202.91	103.5	202.96	3.51206	1.80493	up	0.000315416	0.00687319	ko00564//Glycerophospholipid metabolism	GO:0005737//cytoplasm;GO:0016021//integral component of membrane	GO:0000234//phosphoethanolamine N-methyltransferase activity	GO:0006656//phosphatidylcholine biosynthetic process;GO:0032259//methylation	gi|937920273|dbj|BAS95191.1|/0/Os05g0548900 [Oryza sativa Japonica Group]
LOC_Os08g43334	1466	59	30	93	254	140	166	3.6411	1.80403	up	1.66e-06	8.67e-05	-	-	GO:0003677//DNA binding	GO:0006351//transcription, DNA-templated	gi|33591098|gb|AAQ23056.1|;gi|75225495|sp|Q6Z9C8.1|HFB2B_ORYSJ/0;0/heat shock factor RHSF2 [Oryza sativa Japonica Group];RecName: Full=Heat stress transcription factor B-2b; AltName: Full=Heat stress transcription factor 2; Short=rHsf2; AltName: Full=Heat stress transcription factor 21; Short=OsHsf-21
LOC_Os04g57720	513	30	10	15	65	55	52	1.97243	1.80226	up	1.44e-05	0.000550046	ko04075//Plant hormone signal transduction	GO:0005622//intracellular	-	GO:0000160//phosphorelay signal transduction system;GO:0009736//cytokinin-activated signaling pathway;GO:0006355//regulation of transcription, DNA-templated	gi|75296424|sp|Q7XQA6.1|ORR6_ORYSJ/2.28187e-87/RecName: Full=Two-component response regulator ORR6; AltName: Full=OsRR6; AltName: Full=OsRRA6
LOC_Os04g55220	1728	25	13	11	58	47	49	1.82206	1.80185	up	1.41e-05	0.000538504	-	GO:0016021//integral component of membrane;GO:0009506//plasmodesma;GO:0005783//endoplasmic reticulum;GO:0005886//plasma membrane	GO:0008289//lipid binding	-	gi|32487348|emb|CAE03170.1|/0/OSJNBa0070O11.1 [Oryza sativa Japonica Group]
LOC_Os02g32970	1119	47	18	111	247	123	165	3.57927	1.80147	up	0.000154573	0.00383951	-	-	GO:0016787//hydrolase activity	-	gi|50251390|dbj|BAD28417.1|/0/hydrolase, alpha/beta fold protein-like [Oryza sativa Japonica Group]
LOC_Os05g49900	1563	34	14	110	174	91	212	3.42106	1.80028	up	0.000881713	0.0155545	ko01110//Biosynthesis of secondary metabolites;ko00062//Fatty acid elongation	GO:0016021//integral component of membrane	GO:0016747//transferase activity, transferring acyl groups other than amino-acyl groups	GO:0006633//fatty acid biosynthetic process	gi|113579942|dbj|BAF18305.1|/0/Os05g0574600 [Oryza sativa Japonica Group]
LOC_Os12g36110	2022	78	99	108	250	210	426	4.30047	1.79675	up	3.8e-08	3.42e-06	ko04916//Melanogenesis;ko04020//Calcium signaling pathway;ko04270//Vascular smooth muscle contraction;ko05133//Pertussis;ko04744//Phototransduction;ko04626//Plant-pathogen interaction;ko04910//Insulin signaling pathway;ko04970//Salivary secretion;ko04912//GnRH signaling pathway;ko04722//Neurotrophin signaling pathway;ko05034//Alcoholism;ko05031//Amphetamine addiction;ko04745//Phototransduction - …	-	GO:0005516//calmodulin binding	GO:0006950//response to stress	gi|1002314498|ref|XP_015620621.1|/0/PREDICTED: calmodulin-binding protein 60 D isoform X2 [Oryza sativa Japonica Group]
LOC_Os01g49710	720	9	4	11	37	11	26	0.852616	1.79444	up	0.00366045	0.0445899	ko00980//Metabolism of xenobiotics by cytochrome P450;ko05200//Pathways in cancer;ko00480//Glutathione metabolism;ko00982//Drug metabolism - cytochrome P450;ko05215//Prostate cancer	GO:0005739//mitochondrion	GO:0016740//transferase activity	GO:0044237//cellular metabolic process	gi|1002227395|ref|XP_015631774.1|/3.85215e-119/PREDICTED: probable glutathione S-transferase GSTU6 [Oryza sativa Japonica Group]
LOC_Os10g25210	1479	21	24	35	97	71	81	2.49293	1.7941	up	3.43e-07	2.29e-05	-	GO:0019005//SCF ubiquitin ligase complex	GO:0004842//ubiquitin-protein transferase activity	GO:0016567//protein ubiquitination;GO:0031146//SCF-dependent proteasomal ubiquitin-dependent protein catabolic process	gi|31431842|gb|AAP53561.1|/0/F-box protein interaction domain containing protein, expressed [Oryza sativa Japonica Group]
LOC_Os06g28124	1605	59	51	71	184	205	176	3.64318	1.79391	up	2.24e-11	4.73e-09	-	GO:0016021//integral component of membrane	GO:0016757//transferase activity, transferring glycosyl groups	-	gi|113595675|dbj|BAF19549.1|/0/Os06g0475400 [Oryza sativa Japonica Group]
LOC_Os08g44390	762	39	15	66	147	63	152	3.03337	1.78933	up	0.000131093	0.00335626	ko04626//Plant-pathogen interaction	GO:0005737//cytoplasm	GO:0004198//calcium-dependent cysteine-type endopeptidase activity;GO:0005509//calcium ion binding	GO:0006508//proteolysis	gi|113624460|dbj|BAF24405.1|/3.04726e-115/Os08g0558100 [Oryza sativa Japonica Group]
LOC_Os03g57450	1800	13	7	9	27	35	29	1.1073	1.78825	up	0.000131442	0.00336072	ko05145//Toxoplasmosis;ko04626//Plant-pathogen interaction	GO:0005737//cytoplasm;GO:0005634//nucleus;GO:0005886//plasma membrane	GO:0005516//calmodulin binding;GO:0005509//calcium ion binding;GO:0009931//calcium-dependent protein serine/threonine kinase activity;GO:0005524//ATP binding;GO:0004683//calmodulin-dependent protein kinase activity	GO:0018105//peptidyl-serine phosphorylation;GO:0046777//protein autophosphorylation;GO:0035556//intracellular signal transduction;GO:0009738//abscisic acid-activated signaling pathway	gi|113549974|dbj|BAF13417.1|/0/Os03g0788500 [Oryza sativa Japonica Group]
LOC_Os04g51660	1401	12	11	24	81	28	35	1.7436	1.78613	up	0.000564485	0.0109009	ko00941//Flavonoid biosynthesis;ko00073//Cutin, suberine and wax biosynthesis;ko00940//Phenylpropanoid biosynthesis;ko00330//Arginine and proline metabolism;ko00945//Stilbenoid, diarylheptanoid and gingerol biosynthesis;ko01110//Biosynthesis of secondary metabolites	GO:0005739//mitochondrion	GO:0016747//transferase activity, transferring acyl groups other than amino-acyl groups	-	gi|38346544|emb|CAE02125.2|/0/OSJNBa0035M09.5 [Oryza sativa Japonica Group]
LOC_Os01g50100	3546	329	350	282	1342	712	914	6.03949	1.78337	up	3e-09	3.73e-07	ko04976//Bile secretion;ko02010//ABC transporters	GO:0016021//integral component of membrane	GO:0042626//ATPase activity, coupled to transmembrane movement of substances;GO:0005524//ATP binding	GO:0055085//transmembrane transport	gi|674884486|emb|CDY48003.1|/0/BnaA04g26870D [Brassica napus]
LOC_Os03g49350	2094	5	9	7	26	21	19	0.695624	1.77971	up	0.00159725	0.0244444	ko00591//Linoleic acid metabolism	-	GO:0046872//metal ion binding;GO:0016702//oxidoreductase activity, acting on single donors with incorporation of molecular oxygen, incorporation of two atoms of oxygen	GO:0031408//oxylipin biosynthetic process;GO:0055114//oxidation-reduction process	gi|113549464|dbj|BAF12907.1|/0/Os03g0700400 [Oryza sativa Japonica Group]
LOC_Os02g41580	918	119	68	152	372	272	385	4.51498	1.77884	up	6.77e-09	7.59e-07	ko05145//Toxoplasmosis;ko04626//Plant-pathogen interaction	GO:0005737//cytoplasm;GO:0005634//nucleus;GO:0005886//plasma membrane	GO:0005516//calmodulin binding;GO:0009931//calcium-dependent protein serine/threonine kinase activity;GO:0005524//ATP binding;GO:0004683//calmodulin-dependent protein kinase activity	GO:0018105//peptidyl-serine phosphorylation;GO:0046777//protein autophosphorylation;GO:0035556//intracellular signal transduction;GO:0009738//abscisic acid-activated signaling pathway	gi|89000769|dbj|BAE80214.1|/8.52502e-172/phosphoenolpyruvate carboxylase kinase [Oryza sativa Japonica Group]
LOC_Os07g36000	4206	35.66	7.42	12.2	37.44	72.65	60.72	1.95817	1.77879	up	0.000353121	0.00743245	ko00900//Terpenoid backbone biosynthesis;ko00130//Ubiquinone and other terpenoid-quinone biosynthesis;ko00908//Zeatin biosynthesis;ko01100//Metabolic pathways;ko03008//Ribosome biogenesis in eukaryotes;ko01110//Biosynthesis of secondary metabolites;ko03018//RNA degradation	-	-	-	gi|108708249|gb|ABF96044.1|/0/transposon protein, putative, unclassified [Oryza sativa Japonica Group]
LOC_Os08g23150	1155	68	107	78	277	257	254	4.12648	1.77844	up	3.54e-10	5.76e-08	ko00400//Phenylalanine, tyrosine and tryptophan biosynthesis;ko01100//Metabolic pathways;ko01110//Biosynthesis of secondary metabolites	GO:0009536//plastid	GO:0004640//phosphoribosylanthranilate isomerase activity;GO:0004425//indole-3-glycerol-phosphate synthase activity	GO:0000162//tryptophan biosynthetic process	gi|1002293386|ref|XP_015651034.1|/0/PREDICTED: indole-3-glycerol phosphate synthase, chloroplastic [Oryza sativa Japonica Group]
LOC_Os01g02900	1689	9	19	32	72	33	78	2.07827	1.77616	up	0.000326192	0.00703607	-	GO:0016021//integral component of membrane;GO:0005739//mitochondrion	GO:0016757//transferase activity, transferring glycosyl groups	-	gi|218187403|gb|EEC69830.1|/0/hypothetical protein OsI_00151 [Oryza sativa Indica Group]
LOC_Os01g71760	1527	8.18	3.36	17.19	29.74	35.92	22.89	1.07205	1.77484	up	0.000820298	0.0147561	-	GO:0005887//integral component of plasma membrane	GO:0015185//gamma-aminobutyric acid transmembrane transporter activity;GO:0015189//L-lysine transmembrane transporter activity;GO:0015180//L-alanine transmembrane transporter activity;GO:0015181//arginine transmembrane transporter activity;GO:0005313//L-glutamate transmembrane transporter activity;GO:0015297//antiporter activity	GO:1903401//L-lysine transmembrane transport;GO:0015812//gamma-aminobutyric acid transport;GO:0089711//L-glutamate transmembrane transport;GO:0015808//L-alanine transport;GO:1903826//arginine transmembrane transport	gi|1002229077|ref|XP_015641827.1|/0/PREDICTED: amino-acid permease BAT1 homolog [Oryza sativa Japonica Group]
LOC_Os08g09900	2565	21	22	12	40	65	66	1.96741	1.7682	up	1.34e-05	0.000517702	ko04626//Plant-pathogen interaction	-	-	-	gi|113623171|dbj|BAF23116.1|/0/Os08g0198900 [Oryza sativa Japonica Group]
LOC_Os03g55320	1140	245	233	269	860	483	916	5.65414	1.76489	up	4.04e-09	4.94e-07	ko04075//Plant hormone signal transduction	GO:0008287//protein serine/threonine phosphatase complex;GO:0005739//mitochondrion	GO:0046872//metal ion binding;GO:0004722//protein serine/threonine phosphatase activity	GO:0006470//protein dephosphorylation	gi|937911588|dbj|BAS86508.1|;gi|108711211|gb|ABF99006.1|;gi|75250158|sp|Q94H98.1|P2C34_ORYSJ/0;1.52525e-174;0/Os03g0761100 [Oryza sativa Japonica Group];protein phosphatase 2C family protein, putative, expressed [Oryza sativa Japonica Group];RecName: Full=Probable protein phosphatase 2C 34; Short=OsPP2C34; AltName: Full=BTH-induced protein phosphatase 2C 2; Short=OsBIPP2C2
LOC_Os10g04730	1968	44	140	28	219	332	129	3.89935	1.76328	up	0.00060075	0.0114172	ko05142//Chagas disease (American trypanosomiasis);ko05133//Pertussis;ko05145//Toxoplasmosis;ko04626//Plant-pathogen interaction;ko04722//Neurotrophin signaling pathway;ko05162//Measles;ko04620//Toll-like receptor signaling pathway;ko05164//Influenza A;ko05140//Leishmaniasis;ko05152//Tuberculosis;ko04064//NF-kappa B signaling pathway;ko04210//Apoptosis	GO:0016021//integral component of membrane;GO:0009506//plasmodesma;GO:0016023//cytoplasmic, membrane-bounded vesicle;GO:0005886//plasma membrane	GO:0004674//protein serine/threonine kinase activity;GO:0005524//ATP binding	GO:0006952//defense response;GO:0006468//protein phosphorylation	gi|31430077|gb|AAP52041.1|/0/Protein kinase domain containing protein, expressed [Oryza sativa Japonica Group]
LOC_Os03g56430	2832	15	8	14	37	35	41	1.40814	1.76241	up	3.72e-05	0.00119382	-	-	-	-	gi|108711333|gb|ABF99128.1|/0/expressed protein [Oryza sativa Japonica Group]
LOC_Os06g45710	1206	100	83	134	425	290	245	4.41474	1.76228	up	3.1e-09	3.83e-07	ko00710//Carbon fixation in photosynthetic organisms;ko01120//Microbial metabolism in diverse environments;ko01100//Metabolic pathways;ko01110//Biosynthesis of secondary metabolites;ko00010//Glycolysis / Gluconeogenesis	GO:0005829//cytosol;GO:0009506//plasmodesma;GO:0005774//vacuolar membrane;GO:0009570//chloroplast stroma;GO:0005634//nucleus;GO:0005886//plasma membrane;GO:0048046//apoplast	GO:0004618//phosphoglycerate kinase activity;GO:0005524//ATP binding	GO:0006096//glycolytic process	gi|113596357|dbj|BAF20231.1|/0/Os06g0668200 [Oryza sativa Japonica Group]
LOC_Os05g05680	927	96.53	226.93	145.84	246.39	533.43	677.23	5.00654	1.7595	up	9.32e-06	0.000385369	ko00270//Cysteine and methionine metabolism;ko01100//Metabolic pathways;ko01110//Biosynthesis of secondary metabolites	-	GO:0046872//metal ion binding;GO:0051213//dioxygenase activity	GO:0055114//oxidation-reduction process;GO:0009693//ethylene biosynthetic process	gi|113578208|dbj|BAF16571.1|/0/Os05g0149400 [Oryza sativa Japonica Group]
LOC_Os09g39620	2577	18	14	24	79	50	41	1.96841	1.75892	up	1.92e-05	0.000702116	ko00903//Limonene and pinene degradation;ko05142//Chagas disease (American trypanosomiasis);ko05133//Pertussis;ko05145//Toxoplasmosis;ko00642//Ethylbenzene degradation;ko00362//Benzoate degradation;ko04722//Neurotrophin signaling pathway;ko05162//Measles;ko00240//Pyrimidine metabolism;ko00051//Fructose and mannose metabolism;ko04620//Toll-like receptor signaling pathway;ko05164//Influenza A;ko011…	-	GO:0004842//ubiquitin-protein transferase activity;GO:0004672//protein kinase activity;GO:0005524//ATP binding	GO:0006950//response to stress;GO:0016567//protein ubiquitination;GO:0006468//protein phosphorylation	gi|113632213|dbj|BAF25894.1|/0/Os09g0569800 [Oryza sativa Japonica Group]
LOC_Os10g17940	1440	16	5	20	31	32	60	1.52893	1.75629	up	0.000586559	0.0112366	-	GO:0019005//SCF ubiquitin ligase complex	GO:0004842//ubiquitin-protein transferase activity	GO:0031146//SCF-dependent proteasomal ubiquitin-dependent protein catabolic process	gi|31431168|gb|AAP52983.1|/0/F-box domain containing protein [Oryza sativa Japonica Group]
LOC_Os07g41230	1155	16	14	12	35	34	59	1.58322	1.75589	up	8.64e-05	0.00237703	ko00860//Porphyrin and chlorophyll metabolism;ko01110//Biosynthesis of secondary metabolites;ko00901//Indole alkaloid biosynthesis	GO:0009536//plastid	GO:0050529	-	gi|1002281433|ref|XP_015645017.1|/0/PREDICTED: putative methylesterase 11, chloroplastic [Oryza sativa Japonica Group]
LOC_Os08g34580	2475	14	7	22	38	42	50	1.59822	1.75554	up	7.18e-05	0.00204839	ko00500//Starch and sucrose metabolism	GO:0009536//plastid	GO:0003824//catalytic activity	GO:0005992//trehalose biosynthetic process	gi|113623894|dbj|BAF23839.1|/0/Os08g0445700 [Oryza sativa Japonica Group]
LOC_Os03g27990	2262	103	125	101	434	272	294	4.47912	1.75443	up	2.19e-09	2.84e-07	ko04626//Plant-pathogen interaction	GO:0016021//integral component of membrane	GO:0004672//protein kinase activity;GO:0005524//ATP binding	GO:0006468//protein phosphorylation	gi|937909657|dbj|BAS84577.1|/0/Os03g0397700 [Oryza sativa Japonica Group]
LOC_Os01g06660	1794	54	42	60	228	135	107	3.39912	1.7528	up	3.14e-07	2.16e-05	ko01100//Metabolic pathways;ko00380//Tryptophan metabolism;ko01110//Biosynthesis of secondary metabolites;ko00010//Glycolysis / Gluconeogenesis	-	GO:0000287//magnesium ion binding;GO:0030976//thiamine pyrophosphate binding;GO:0004737//pyruvate decarboxylase activity	-	gi|113531619|dbj|BAF04002.1|/0/Os01g0160100 [Oryza sativa Japonica Group]
LOC_Os04g49000	639	11	3	15	28	24	35	1.06451	1.74939	up	0.00116333	0.0192477	ko01100//Metabolic pathways;ko00563//Glycosylphosphatidylinositol(GPI)-anchor biosynthesis	GO:0016023//cytoplasmic, membrane-bounded vesicle	GO:0046872//metal ion binding	-	gi|32488512|emb|CAE03264.1|/7.30874e-97/OSJNBa0011J08.19 [Oryza sativa Japonica Group]
LOC_Os04g41970	1872	10	9	11	36	24	31	1.12558	1.74844	up	0.000206326	0.00489063	ko00500//Starch and sucrose metabolism;ko00520//Amino sugar and nucleotide sugar metabolism;ko01100//Metabolic pathways;ko01110//Biosynthesis of secondary metabolites	GO:0016021//integral component of membrane	GO:0008810//cellulase activity;GO:0016740//transferase activity	GO:0030245//cellulose catabolic process	gi|75144679|sp|Q7XUK4.2|GUN12_ORYSJ/0/RecName: Full=Endoglucanase 12; AltName: Full=Endo-1,4-beta glucanase 12; AltName: Full=OsGLU3
LOC_Os06g42030	2532	35	16	27	103	45	84	2.41362	1.74744	up	3.23e-05	0.00106431	-	GO:0005886//plasma membrane;GO:0005774//vacuolar membrane;GO:0016021//integral component of membrane	GO:0015079//potassium ion transmembrane transporter activity	GO:0071805//potassium ion transmembrane transport	gi|62900352|sp|Q67VS5.1|HAK10_ORYSJ/0/RecName: Full=Potassium transporter 10; AltName: Full=OsHAK10
LOC_Os11g45400	1632	95	27	125	253	153	317	4.0236	1.74681	up	5.76e-05	0.00170299	ko00564//Glycerophospholipid metabolism;ko01100//Metabolic pathways;ko00561//Glycerolipid metabolism	GO:0016021//integral component of membrane	GO:0016791//phosphatase activity;GO:0090447//glycerol-3-phosphate 2-O-acyltransferase activity	GO:0016311//dephosphorylation;GO:0010143//cutin biosynthetic process	gi|937940330|dbj|BAT15243.1|/0/Os11g0679700, partial [Oryza sativa Japonica Group]
LOC_Os03g62430	2916	181	122	220	640	321	583	5.11271	1.74237	up	6.84e-08	5.78e-06	ko05142//Chagas disease (American trypanosomiasis);ko05133//Pertussis;ko05145//Toxoplasmosis;ko04722//Neurotrophin signaling pathway;ko05162//Measles;ko04620//Toll-like receptor signaling pathway;ko05164//Influenza A;ko05140//Leishmaniasis;ko05152//Tuberculosis;ko04064//NF-kappa B signaling pathway;ko04210//Apoptosis	GO:0016021//integral component of membrane;GO:0016023//cytoplasmic, membrane-bounded vesicle;GO:0005886//plasma membrane	GO:0004674//protein serine/threonine kinase activity;GO:0005509//calcium ion binding;GO:0030247//polysaccharide binding;GO:0005524//ATP binding	GO:0006468//protein phosphorylation;GO:0007166//cell surface receptor signaling pathway	gi|108712014|gb|ABF99809.1|/0/Calcium binding EGF domain containing protein, expressed [Oryza sativa Japonica Group]
LOC_Os06g43350	1557	24	69	12	98	169	65	2.8848	1.74185	up	0.00126767	0.0205658	ko00943//Isoflavonoid biosynthesis;ko00624//Polycyclic aromatic hydrocarbon degradation;ko00903//Limonene and pinene degradation;ko00460//Cyanoamino acid metabolism;ko00904//Diterpenoid biosynthesis;ko01120//Microbial metabolism in diverse environments;ko01100//Metabolic pathways;ko00627//Aminobenzoate degradation;ko00945//Stilbenoid, diarylheptanoid and gingerol biosynthesis;ko00363//Bisphenol d…	GO:0016021//integral component of membrane	GO:0016709//oxidoreductase activity, acting on paired donors, with incorporation or reduction of molecular oxygen, NAD(P)H as one donor, and incorporation of one atom of oxygen;GO:0020037//heme binding;GO:0005506//iron ion binding	GO:0044550//secondary metabolite biosynthetic process;GO:0055114//oxidation-reduction process	gi|113596204|dbj|BAF20078.1|/0/Os06g0640500 [Oryza sativa Japonica Group]
LOC_Os02g22480	1752	7	16	3	28	20	32	0.959075	1.73924	up	0.0037195	0.0450881	-	GO:0016021//integral component of membrane;GO:0005739//mitochondrion	GO:0051213//dioxygenase activity;GO:0043167//ion binding;GO:0016757//transferase activity, transferring glycosyl groups;GO:0046872//metal ion binding;GO:0031418//L-ascorbic acid binding;GO:0050589//leucocyanidin oxygenase activity	GO:0009987//cellular process;GO:0009813//flavonoid biosynthetic process;GO:0044711;GO:0010023//proanthocyanidin biosynthetic process;GO:0055114//oxidation-reduction process;GO:0009718//anthocyanin-containing compound biosynthetic process;GO:0007033//vacuole organization	gi|113536251|dbj|BAF08634.1|/0/Os02g0330200 [Oryza sativa Japonica Group]
LOC_Os05g05630	4230	19.7	4.7	15.42	26.78	23.54	66.71	1.47227	1.73365	up	0.00256889	0.0341142	ko05166//HTLV-I infection;ko04115//p53 signaling pathway;ko04110//Cell cycle;ko00908//Zeatin biosynthesis;ko05202//Transcriptional misregulation in cancer;ko01100//Metabolic pathways;ko03008//Ribosome biogenesis in eukaryotes;ko04064//NF-kappa B signaling pathway;ko01110//Biosynthesis of secondary metabolites;ko04210//Apoptosis;ko03018//RNA degradation	-	GO:0003676//nucleic acid binding;GO:0008270//zinc ion binding	GO:0015074//DNA integration	gi|77556955|gb|ABA99751.1|/0/retrotransposon protein, putative, Ty1-copia subclass [Oryza sativa Japonica Group]
LOC_Os04g51150	999	98	57	96	289	191	261	4.05604	1.73337	up	6.44e-09	7.26e-07	-	GO:0016021//integral component of membrane;GO:0070469//respiratory chain;GO:0005739//mitochondrion	GO:0009916//alternative oxidase activity;GO:0046872//metal ion binding	GO:0055114//oxidation-reduction process	gi|3218544|dbj|BAA28772.1|/0/alternative oxidase [Oryza sativa Japonica Group]
LOC_Os09g34230	1428	81	20	216	339	157	411	4.35642	1.73217	up	0.00266426	0.0350651	-	GO:0043231//intracellular membrane-bounded organelle	GO:0080043//quercetin 3-O-glucosyltransferase activity;GO:0080044//quercetin 7-O-glucosyltransferase activity	GO:0009813//flavonoid biosynthetic process;GO:0052696//flavonoid glucuronidation	gi|1002294723|ref|XP_015610796.1|/0/PREDICTED: crocetin glucosyltransferase 2 [Oryza sativa Japonica Group]
LOC_Os04g45890	1314	85.06	42	140	391	112	269.01	4.12876	1.73162	up	0.000144754	0.00364758	-	-	-	-	gi|38345942|emb|CAD41274.2|/0/OSJNBb0103I08.13 [Oryza sativa Japonica Group]
LOC_Os10g37850	1728	15	20	11	31	77	33	1.69667	1.72454	up	0.000315075	0.00687319	ko04140//Regulation of autophagy	GO:0005634//nucleus;GO:0005737//cytoplasm	-	-	gi|78708933|gb|ABB47908.1|;gi|31433131|gb|AAP54684.1|/0;0/Armadillo/beta-catenin-like repeat family protein, expressed [Oryza sativa Japonica Group];Armadillo/beta-catenin-like repeat family protein, expressed [Oryza sativa Japonica Group]
LOC_Os12g36910	1731	28	50	53	142	97	150	3.1421	1.72412	up	6.73e-07	4.02e-05	ko04916//Melanogenesis;ko04020//Calcium signaling pathway;ko04270//Vascular smooth muscle contraction;ko05133//Pertussis;ko04744//Phototransduction;ko04626//Plant-pathogen interaction;ko04910//Insulin signaling pathway;ko04970//Salivary secretion;ko04912//GnRH signaling pathway;ko04722//Neurotrophin signaling pathway;ko05034//Alcoholism;ko05031//Amphetamine addiction;ko04745//Phototransduction - …	-	GO:0005516//calmodulin binding	GO:0006950//response to stress	gi|113649508|dbj|BAF30020.1|/0/Os12g0556200 [Oryza sativa Japonica Group]
LOC_Os08g04180	1416	723	787	486	2261	2002	1721	7.0513	1.72322	up	5.48e-10	8.61e-08	ko00260//Glycine, serine and threonine metabolism;ko00400//Phenylalanine, tyrosine and tryptophan biosynthesis;ko01100//Metabolic pathways;ko01110//Biosynthesis of secondary metabolites	GO:0009507//chloroplast	GO:0004834//tryptophan synthase activity;GO:0030170//pyridoxal phosphate binding	GO:0000162//tryptophan biosynthetic process	gi|113622914|dbj|BAF22859.1|/0/Os08g0135900 [Oryza sativa Japonica Group]
LOC_Os07g05740	3330	14	13	15	40	36	49	1.55625	1.72201	up	2.75e-05	0.000934786	ko00903//Limonene and pinene degradation;ko00642//Ethylbenzene degradation;ko00362//Benzoate degradation;ko00240//Pyrimidine metabolism;ko00051//Fructose and mannose metabolism;ko01120//Microbial metabolism in diverse environments;ko01100//Metabolic pathways;ko00627//Aminobenzoate degradation;ko00350//Tyrosine metabolism	GO:0016021//integral component of membrane	GO:0004672//protein kinase activity;GO:0005524//ATP binding	GO:0006468//protein phosphorylation	gi|937925177|dbj|BAT00094.1|/0/Os07g0152200 [Oryza sativa Japonica Group]
LOC_Os02g58170	2580	10	11	22	47	47	34	1.58127	1.72103	up	7.01e-05	0.00201318	-	-	-	-	gi|113538132|dbj|BAF10515.1|/0/Os02g0828500 [Oryza sativa Japonica Group]
LOC_Os03g03034	907	27	34	28	49	93	124	2.59641	1.71909	up	1.62e-05	0.000606428	ko00941//Flavonoid biosynthesis;ko01100//Metabolic pathways;ko01110//Biosynthesis of secondary metabolites	-	GO:0051213//dioxygenase activity;GO:0046872//metal ion binding	GO:0055114//oxidation-reduction process	gi|108705911|gb|ABF93706.1|;gi|108705913|gb|ABF93708.1|;gi|108705912|gb|ABF93707.1|;gi|25446683|gb|AAN74830.1|/0;0;6.63219e-126;2.64059e-131/oxidoreductase, 2OG-Fe oxygenase family protein, expressed [Oryza sativa Japonica Group];oxidoreductase, 2OG-Fe oxygenase family protein, expressed [Oryza sativa Japonica Group];oxidoreductase, 2OG-Fe oxygenase family protein, expressed [Oryza sativa Japonic…
LOC_Os03g16170	1215	93	30	136	286	181	279	4.07094	1.71907	up	2.51e-05	0.000868145	ko04075//Plant hormone signal transduction	GO:0009536//plastid	GO:0046872//metal ion binding;GO:0004722//protein serine/threonine phosphatase activity	GO:0006470//protein dephosphorylation	gi|75239592|sp|Q84JI0.1|P2C30_ORYSJ/0/RecName: Full=Probable protein phosphatase 2C 30; Short=OsPP2C30
LOC_Os03g06200	1281	92	102	112	361	239	302	4.34049	1.7179	up	6.85e-10	1.05e-07	ko00260//Glycine, serine and threonine metabolism;ko00680//Methane metabolism;ko01120//Microbial metabolism in diverse environments;ko01100//Metabolic pathways;ko00350//Tyrosine metabolism;ko00750//Vitamin B6 metabolism	-	GO:0004648//O-phospho-L-serine:2-oxoglutarate aminotransferase activity	GO:0006564//L-serine biosynthetic process	gi|125542475|gb|EAY88614.1|/0/hypothetical protein OsI_10089 [Oryza sativa Indica Group]
LOC_Os04g58470	2136	8	6	11	22	24	28.29	0.861248	1.7154	up	0.000686761	0.0127427	-	GO:0016021//integral component of membrane	-	-	gi|125592092|gb|EAZ32442.1|/0/hypothetical protein OsJ_16653 [Oryza sativa Japonica Group]
LOC_Os01g64170	1191	78	32	243	330	180	491	4.50092	1.71489	up	0.00159295	0.0244176	-	GO:0046658//anchored component of plasma membrane;GO:0016023//cytoplasmic, membrane-bounded vesicle	GO:0004553//hydrolase activity, hydrolyzing O-glycosyl compounds;GO:0030247//polysaccharide binding	GO:0005975//carbohydrate metabolic process	gi|1002233661|ref|XP_015621028.1|/0/PREDICTED: glucan endo-1,3-beta-glucosidase 14 isoform X2 [Oryza sativa Japonica Group]
LOC_Os09g24900	1851	24	33	18	61	66	96	2.35747	1.71068	up	9.94e-06	0.000406335	-	GO:0005768//endosome;GO:0005774//vacuolar membrane;GO:0016021//integral component of membrane;GO:0005802//trans-Golgi network	GO:0008757//S-adenosylmethionine-dependent methyltransferase activity;GO:0016301//kinase activity	GO:0016310//phosphorylation;GO:0032259//methylation	gi|50251539|dbj|BAD28913.1|/0/dehydration-responsive protein-like [Oryza sativa Japonica Group]
LOC_Os01g61510	1494	17	21	18	51	67	49	1.94562	1.71055	up	3.97e-06	0.000184978	-	GO:0005887//integral component of plasma membrane	GO:0008519//ammonium transmembrane transporter activity	GO:0072488//ammonium transmembrane transport;GO:0015695//organic cation transport;GO:0019740//nitrogen utilization	gi|75159238|sp|Q8S233.1|AMT23_ORYSJ/0/RecName: Full=Ammonium transporter 2 member 3; Short=OsAMT2;3
LOC_Os07g44410	1980	309	129	373	1352	475	487	5.70314	1.70601	up	9.84e-05	0.00264697	-	-	-	-	gi|113611942|dbj|BAF22320.1|/0/Os07g0638100 [Oryza sativa Japonica Group]
LOC_Os06g05130	1284	127	101	83	457	196	252	4.35422	1.70404	up	9.98e-07	5.58e-05	ko00061//Fatty acid biosynthesis;ko01100//Metabolic pathways	GO:0009536//plastid	GO:0016790//thiolester hydrolase activity	GO:0006633//fatty acid biosynthetic process	gi|113594816|dbj|BAF18690.1|/0/Os06g0143400 [Oryza sativa Japonica Group]
LOC_Os05g51130	1455	39	26	33	97	47	139	2.70607	1.7038	up	5.01e-05	0.00152616	-	-	GO:0005524//ATP binding	-	gi|1002270241|ref|XP_015639446.1|/0/PREDICTED: AAA-ATPase At3g50940 [Oryza sativa Japonica Group]
LOC_Os01g09010	1260	96	35	98	213	137	304	3.8906	1.70293	up	1.31e-05	0.000511355	ko00073//Cutin, suberine and wax biosynthesis	-	GO:0016747//transferase activity, transferring acyl groups other than amino-acyl groups	-	gi|113531770|dbj|BAF04153.1|/0/Os01g0185300 [Oryza sativa Japonica Group]
LOC_Os05g38720	1377	12	6	12	32	16	39	1.08267	1.7015	up	0.00152168	0.0237041	-	GO:0016021//integral component of membrane;GO:0016023//cytoplasmic, membrane-bounded vesicle	-	-	gi|113579318|dbj|BAF17681.1|/0/Os05g0462500 [Oryza sativa Japonica Group]
LOC_Os05g49170	669	13	18	8	41	41	34	1.45514	1.70042	up	0.000125064	0.00323212	-	GO:0016021//integral component of membrane;GO:0009536//plastid	-	-	gi|51854280|gb|AAU10661.1|/4.21757e-98/cold acclimation protein COR413-TM1 [Oryza sativa Japonica Group]
LOC_Os04g46970	1824	51	11	37	158	70	55	2.69823	1.69949	up	0.000802876	0.0144699	ko00908//Zeatin biosynthesis	GO:0043231//intracellular membrane-bounded organelle	GO:0008194//UDP-glycosyltransferase activity;GO:0016758//transferase activity, transferring hexosyl groups	GO:0009813//flavonoid biosynthetic process;GO:0052696//flavonoid glucuronidation	gi|113565096|dbj|BAF15439.1|/0/Os04g0556400, partial [Oryza sativa Japonica Group]
LOC_Os07g33780	1767	166	246	277	541	854	639	5.49275	1.69932	up	1.55e-09	2.17e-07	ko03040//Spliceosome;ko04976//Bile secretion;ko02010//ABC transporters	GO:0005886//plasma membrane;GO:0016021//integral component of membrane	GO:0042626//ATPase activity, coupled to transmembrane movement of substances;GO:0005524//ATP binding	GO:0055085//transmembrane transport	gi|222637159|gb|EEE67291.1|/0/hypothetical protein OsJ_24490 [Oryza sativa Japonica Group]
LOC_Os03g18850	483	14	9	10	21	33	43	1.2156	1.69856	up	0.000473781	0.00937589	ko04075//Plant hormone signal transduction	GO:0005737//cytoplasm;GO:0005634//nucleus	GO:0004864//protein phosphatase inhibitor activity;GO:0004872//receptor activity;GO:0010427//abscisic acid binding	GO:0006952//defense response;GO:0009738//abscisic acid-activated signaling pathway;GO:0043086//negative regulation of catalytic activity;GO:0080163//regulation of protein serine/threonine phosphatase activity;GO:0009607//response to biotic stimulus	gi|16589076|gb|AAL27005.1|AF416604_1/3.06798e-116/pathogen-related protein [Oryza sativa]
LOC_Os02g57290	1932	62	81	87	273	291	114	3.91796	1.69544	up	1.19e-06	6.52e-05	ko00906//Carotenoid biosynthesis	GO:0009941//chloroplast envelope	GO:0005506//iron ion binding;GO:0020037//heme binding;GO:0016705//oxidoreductase activity, acting on paired donors, with incorporation or reduction of molecular oxygen;GO:0010291//carotene beta-ring hydroxylase activity	GO:0016123//xanthophyll biosynthetic process;GO:0055114//oxidation-reduction process	gi|113538057|dbj|BAF10440.1|/0/Os02g0817900 [Oryza sativa Japonica Group]
LOC_Os10g41550	1635	24	25	31	61	37	132	2.41808	1.69312	up	0.000310281	0.00679219	ko00500//Starch and sucrose metabolism;ko01100//Metabolic pathways	GO:0009570//chloroplast stroma	GO:0016161//beta-amylase activity	GO:0000024//maltose biosynthetic process;GO:0005983//starch catabolic process	gi|31433554|gb|AAP55052.1|/0/Glycosyl hydrolase family 14 protein, expressed [Oryza sativa Japonica Group]
LOC_Os01g72460	612	67	45	72	202	135	192	3.58497	1.69213	up	2.17e-08	2.16e-06	-	-	GO:0003955//NAD(P)H dehydrogenase (quinone) activity	GO:0055114//oxidation-reduction process	gi|75164061|sp|Q941Y8.1|NQR2_ORYSJ/5.28077e-135/RecName: Full=Probable NADPH:quinone oxidoreductase 2
LOC_Os03g55050	1347	42	24	29	78	96	102	2.65416	1.69102	up	4.24e-07	2.71e-05	ko00940//Phenylpropanoid biosynthesis;ko00402//Benzoxazinoid biosynthesis	GO:0043231//intracellular membrane-bounded organelle	GO:0080043//quercetin 3-O-glucosyltransferase activity;GO:0080044//quercetin 7-O-glucosyltransferase activity	GO:0009813//flavonoid biosynthetic process;GO:0052696//flavonoid glucuronidation	gi|113549797|dbj|BAF13240.1|/0/Os03g0757600 [Oryza sativa Japonica Group]
LOC_Os03g44810	1020	24	6	55	93	41	104	2.46581	1.68975	up	0.00297205	0.0379694	-	GO:0005634//nucleus	GO:0016874//ligase activity;GO:0061630//ubiquitin protein ligase activity;GO:0008270//zinc ion binding	GO:0016567//protein ubiquitination;GO:0043161//proteasome-mediated ubiquitin-dependent protein catabolic process	gi|75296682|sp|Q7XZZ3.1|BAHL1_ORYSJ;gi|1002254480|ref|XP_015631500.1|/0;2.69867e-164/RecName: Full=Probable E3 ubiquitin-protein ligase BAH1-like 1;PREDICTED: probable E3 ubiquitin-protein ligase BAH1-like 1 isoform X2 [Oryza sativa Japonica Group]
LOC_Os05g06920	1680	257	493	166	1144	943	638	5.92496	1.68919	up	1.46e-05	0.000556202	-	GO:0009507//chloroplast	GO:0005509//calcium ion binding;GO:0008728//GTP diphosphokinase activity;GO:0008893//guanosine-3',5'-bis(diphosphate) 3'-diphosphatase activity;GO:0005524//ATP binding;GO:0016301//kinase activity;GO:0005525//GTP binding	GO:0042594//response to starvation;GO:0015969//guanosine tetraphosphate metabolic process;GO:0016310//phosphorylation	gi|75119777|sp|Q6ATB2.1|CRSH2_ORYSJ/0/RecName: Full=Probable GTP diphosphokinase CRSH2, chloroplastic; AltName: Full=Calcium-activated RelA/Spot homolog 2; Short=OsCRSH2; AltName: Full=ppGpp synthetase CRSH2; Flags: Precursor
LOC_Os03g52630	1863	43	59	48	156	108	171	3.30944	1.68761	up	1.76e-07	1.31e-05	ko00500//Starch and sucrose metabolism;ko00520//Amino sugar and nucleotide sugar metabolism;ko01100//Metabolic pathways;ko01110//Biosynthesis of secondary metabolites	GO:0016021//integral component of membrane	GO:0008810//cellulase activity	GO:0071555//cell wall organization;GO:0030245//cellulose catabolic process	gi|108710952|gb|ABF98747.1|;gi|75147810|sp|Q84R49.1|GUN10_ORYSJ/0;0/endo-1,4-beta-glucanase Cel1, putative, expressed [Oryza sativa Japonica Group];RecName: Full=Endoglucanase 10; AltName: Full=Endo-1,4-beta glucanase 10; AltName: Full=OsGLU2
LOC_Os05g50250	1140	9	9	16	34	34	31	1.24471	1.68737	up	0.000184826	0.00447196	ko00940//Phenylpropanoid biosynthesis;ko01100//Metabolic pathways;ko01110//Biosynthesis of secondary metabolites	-	GO:0003854//3-beta-hydroxy-delta5-steroid dehydrogenase activity	GO:0006694//steroid biosynthetic process;GO:0055114//oxidation-reduction process	gi|113579964|dbj|BAF18327.1|/0/Os05g0578500 [Oryza sativa Japonica Group]
LOC_Os04g27810	462	12	14	18	53	18	55	1.58896	1.68369	up	0.000863459	0.0153312	-	-	-	-	gi|77551308|gb|ABA94105.1|/5.20035e-40/hypothetical protein LOC_Os11g33280 [Oryza sativa Japonica Group]
LOC_Os03g14370	1528	31	24	60	123	59	143	2.90448	1.6823	up	6.52e-05	0.00189354	-	-	GO:0016597//amino acid binding	GO:0008152//metabolic process	gi|108707164|gb|ABF94959.1|;gi|108707165|gb|ABF94960.1|/0;0/ACT domain containing protein, expressed [Oryza sativa Japonica Group];ACT domain containing protein, expressed [Oryza sativa Japonica Group]
LOC_Os06g18010	1416	14	15	10	45	42	27	1.43445	1.68036	up	0.000151089	0.0037725	ko00943//Isoflavonoid biosynthesis;ko00940//Phenylpropanoid biosynthesis	GO:0043231//intracellular membrane-bounded organelle	GO:0080043//quercetin 3-O-glucosyltransferase activity;GO:0080044//quercetin 7-O-glucosyltransferase activity	GO:0009813//flavonoid biosynthetic process;GO:0052696//flavonoid glucuronidation	gi|75287487|sp|Q5VMI0.1|CGT_ORYSJ/0/RecName: Full=UDP-glucose:2-hydroxyflavanone C-glucosyltransferase; Short=OsCGT
LOC_Os05g32380	1734	9	5	10	23	30	17	0.784216	1.67999	up	0.00153108	0.0237926	ko00564//Glycerophospholipid metabolism;ko00592//alpha-Linolenic acid metabolism;ko00130//Ubiquinone and other terpenoid-quinone biosynthesis;ko01100//Metabolic pathways;ko01110//Biosynthesis of secondary metabolites;ko00561//Glycerolipid metabolism	-	-	-	gi|937918921|dbj|BAS93839.1|/0/Os05g0390000 [Oryza sativa Japonica Group]
LOC_Os06g48210	1860	76	43	83	303	115	152	3.70109	1.67767	up	1.6e-05	0.00060097	-	GO:0071013//catalytic step 2 spliceosome	GO:0003723//RNA binding;GO:0004004//ATP-dependent RNA helicase activity;GO:0008270//zinc ion binding;GO:0005524//ATP binding	GO:0010501//RNA secondary structure unwinding	gi|75321947|sp|Q5Z6G5.1|RH35B_ORYSJ/0/RecName: Full=DEAD-box ATP-dependent RNA helicase 35B
LOC_Os09g27010	1377	7	10	9	38	14	23	0.893089	1.67577	up	0.00389265	0.0466369	ko00903//Limonene and pinene degradation;ko00642//Ethylbenzene degradation;ko00362//Benzoate degradation;ko00240//Pyrimidine metabolism;ko00051//Fructose and mannose metabolism;ko04976//Bile secretion;ko01120//Microbial metabolism in diverse environments;ko01100//Metabolic pathways;ko00627//Aminobenzoate degradation;ko00350//Tyrosine metabolism;ko02010//ABC transporters	GO:0009536//plastid	GO:0004672//protein kinase activity;GO:0005524//ATP binding	GO:0006468//protein phosphorylation	gi|113631521|dbj|BAF25202.1|/0/Os09g0442100 [Oryza sativa Japonica Group]
LOC_Os05g32710	2403	28	39	25	120	59	86	2.61472	1.67515	up	2.01e-05	0.000723843	-	GO:0009507//chloroplast	GO:0019156//isoamylase activity	GO:0010021//amylopectin biosynthetic process;GO:0005977//glycogen metabolic process	gi|1002265939|ref|XP_015637296.1|/0/PREDICTED: isoamylase 2, chloroplastic [Oryza sativa Japonica Group]
LOC_Os05g45100	1419	36	9	43	64	72	112	2.51388	1.67496	up	0.000202462	0.00483488	ko00943//Isoflavonoid biosynthesis	GO:0043231//intracellular membrane-bounded organelle	GO:0080043//quercetin 3-O-glucosyltransferase activity;GO:0080044//quercetin 7-O-glucosyltransferase activity	GO:0009813//flavonoid biosynthetic process;GO:0052696//flavonoid glucuronidation	gi|255676508|dbj|BAF18021.2|/0/Os05g0527000 [Oryza sativa Japonica Group]
LOC_Os08g41500	1047	15	9	24	32	45	60	1.68846	1.67205	up	0.000206289	0.00489063	ko04141//Protein processing in endoplasmic reticulum	-	-	-	gi|1002289089|ref|XP_015648838.1|/0/PREDICTED: UBX domain-containing protein 1 [Oryza sativa Japonica Group]
LOC_Os04g43200	692	109	30	171	347	167	343	4.28673	1.6707	up	0.000323785	0.00700783	-	GO:0016021//integral component of membrane;GO:0012511//monolayer-surrounded lipid storage body;GO:0031969//chloroplast membrane;GO:0005773//vacuole;GO:0005783//endoplasmic reticulum	GO:0005509//calcium ion binding;GO:1990137//plant seed peroxidase activity	GO:0031407//oxylipin metabolic process;GO:0010118//stomatal movement;GO:0055114//oxidation-reduction process;GO:1902609//(R)-2-hydroxy-alpha-linolenic acid biosynthetic process;GO:2000377//regulation of reactive oxygen species metabolic process;GO:0050832//defense response to fungus	gi|75139565|sp|Q7FAX1.1|PXG_ORYSJ/0/RecName: Full=Peroxygenase
LOC_Os01g65520	1878	266	176	547	948	600	1206	5.96101	1.66936	up	1.34e-05	0.000517702	-	GO:0016021//integral component of membrane;GO:0005739//mitochondrion	-	-	gi|20804770|dbj|BAB92455.1|/0/membrane protein CH1-like [Oryza sativa Japonica Group]
LOC_Os12g05440	1530	19	13	33	37	47	99	2.09619	1.66433	up	0.00048004	0.00947041	ko00624//Polycyclic aromatic hydrocarbon degradation;ko00903//Limonene and pinene degradation;ko00073//Cutin, suberine and wax biosynthesis;ko01120//Microbial metabolism in diverse environments;ko01100//Metabolic pathways;ko00627//Aminobenzoate degradation;ko00945//Stilbenoid, diarylheptanoid and gingerol biosynthesis;ko00363//Bisphenol degradation;ko01110//Biosynthesis of secondary metabolites	GO:0016021//integral component of membrane	GO:0020037//heme binding;GO:0016705//oxidoreductase activity, acting on paired donors, with incorporation or reduction of molecular oxygen;GO:0004497//monooxygenase activity;GO:0005506//iron ion binding	GO:0055114//oxidation-reduction process	gi|255670055|dbj|BAF29185.2|/0/Os12g0150200, partial [Oryza sativa Japonica Group]
LOC_Os06g34090	4317	26.62	8.3	34.57	82.15	32.36	78.41	2.17835	1.66411	up	0.000784608	0.0142343	ko04978//Mineral absorption;ko00908//Zeatin biosynthesis;ko01100//Metabolic pathways;ko03008//Ribosome biogenesis in eukaryotes;ko01110//Biosynthesis of secondary metabolites;ko03018//RNA degradation	GO:0016021//integral component of membrane	GO:0003676//nucleic acid binding;GO:0008270//zinc ion binding	GO:0015074//DNA integration	gi|77556089|gb|ABA98885.1|/0/retrotransposon protein, putative, Ty1-copia subclass [Oryza sativa Japonica Group]
LOC_Os11g26130	2739	37	22	31	110	67	77	2.55356	1.65983	up	3.89e-06	0.000181528	ko00903//Limonene and pinene degradation;ko00642//Ethylbenzene degradation;ko00362//Benzoate degradation;ko00240//Pyrimidine metabolism;ko00051//Fructose and mannose metabolism;ko01120//Microbial metabolism in diverse environments;ko01100//Metabolic pathways;ko00627//Aminobenzoate degradation;ko00350//Tyrosine metabolism	GO:0016021//integral component of membrane;GO:0016023//cytoplasmic, membrane-bounded vesicle	GO:0005524//ATP binding;GO:0004674//protein serine/threonine kinase activity	GO:0006468//protein phosphorylation	gi|62701711|gb|AAX92784.1|/0/receptor-like kinase RHG4 [Oryza sativa Japonica Group]
LOC_Os01g56560	774	41	29	43	102	76	140	2.87273	1.65965	up	2.1e-06	0.000107471	-	GO:0005739//mitochondrion	-	-	gi|125527874|gb|EAY75988.1|/6.78945e-136/hypothetical protein OsI_03911 [Oryza sativa Indica Group]
LOC_Os01g68770	1449	607	535	529	1690	1031	1976	6.73265	1.65698	up	1.81e-08	1.82e-06	-	-	GO:0008430//selenium binding	-	gi|113534725|dbj|BAF07108.1|/0/Os01g0916400 [Oryza sativa Japonica Group]
LOC_Os03g12890	1248	95	23	109	164	151	310	3.83363	1.65516	up	0.00023614	0.00541102	ko00770//Pantothenate and CoA biosynthesis;ko00790//Folate biosynthesis;ko00966//Glucosinolate biosynthesis;ko00290//Valine, leucine and isoleucine biosynthesis;ko01100//Metabolic pathways;ko03010//Ribosome;ko00280//Valine, leucine and isoleucine degradation;ko01110//Biosynthesis of secondary metabolites	-	GO:0052654//L-leucine transaminase activity;GO:0052656//L-isoleucine transaminase activity;GO:0052655//L-valine transaminase activity	GO:0009081//branched-chain amino acid metabolic process	gi|108706993|gb|ABF94788.1|;gi|113547932|dbj|BAF11375.1|;gi|108706992|gb|ABF94787.1|;gi|108706991|gb|ABF94786.1|/0;0;0;0/Branched-chain-amino-acid aminotransferase 5, chloroplast precursor, putative, expressed [Oryza sativa Japonica Group];Os03g0231600 [Oryza sativa Japonica Group];Branched-chain-amino-acid aminotransferase 5, chloroplast precursor, putative, expressed [Oryza sativa Japonica Grou…
LOC_Os05g04170	2009	24	30	20	69	101	44	2.29486	1.65456	up	3.13e-05	0.00103747	ko04146//Peroxisome;ko03320//PPAR signaling pathway;ko00071//Fatty acid metabolism;ko01100//Metabolic pathways;ko03010//Ribosome;ko04920//Adipocytokine signaling pathway	GO:0005783//endoplasmic reticulum	GO:0031957//very long-chain fatty acid-CoA ligase activity;GO:0004467//long-chain fatty acid-CoA ligase activity	GO:0010025//wax biosynthetic process;GO:0010143//cutin biosynthetic process;GO:0001676//long-chain fatty acid metabolic process	gi|215740659|dbj|BAG97315.1|;gi|113578107|dbj|BAF16470.1|/0;0/unnamed protein product [Oryza sativa Japonica Group];Os05g0132100 [Oryza sativa Japonica Group]
LOC_Os12g26940	2847	9	10	19	38	39	31	1.36773	1.65289	up	0.000243882	0.00556086	ko04075//Plant hormone signal transduction	GO:0016023//cytoplasmic, membrane-bounded vesicle;GO:0016021//integral component of membrane;GO:0005886//plasma membrane	GO:0004673//protein histidine kinase activity;GO:0004674//protein serine/threonine kinase activity;GO:0005524//ATP binding	GO:0009888//tissue development;GO:0009605//response to external stimulus;GO:0048831//regulation of shoot system development;GO:1901701;GO:0009736//cytokinin-activated signaling pathway;GO:0048580;GO:0006468//protein phosphorylation;GO:0044710;GO:0009628//response to abiotic stimulus;GO:0000160//phosphorelay signal transduction system;GO:0033554//cellular response to stress	gi|122204337|sp|Q2QRN7.1|CHARK_ORYSJ/0/RecName: Full=Probable kinase CHARK; AltName: Full=CHASE domain receptor-like serine/threonine kinase; AltName: Full=OsCRL4; AltName: Full=OsHKL1
LOC_Os05g33840	2163	134	332	252	636	912	530	5.53222	1.65262	up	1.28e-06	6.92e-05	ko00900//Terpenoid backbone biosynthesis;ko01100//Metabolic pathways;ko02010//ABC transporters;ko01110//Biosynthesis of secondary metabolites	GO:0009570//chloroplast stroma	GO:0046872//metal ion binding;GO:0008661//1-deoxy-D-xylulose-5-phosphate synthase activity	GO:0016114//terpenoid biosynthetic process;GO:0009228//thiamine biosynthetic process;GO:0052865//1-deoxy-D-xylulose 5-phosphate biosynthetic process	gi|90110016|sp|O22567.2|DXS1_ORYSJ/0/RecName: Full=1-deoxy-D-xylulose-5-phosphate synthase 1, chloroplastic; Short=1-deoxyxylulose-5-phosphate synthase; Short=DXP synthase; Short=DXPS; Flags: Precursor
LOC_Os06g48470	6033	10.35	10.51	11.41	22.17	25.3	44.11	1.1552	1.65093	up	0.000760568	0.0139034	ko03440//Homologous recombination;ko00240//Pyrimidine metabolism;ko01100//Metabolic pathways;ko03460//Fanconi anemia pathway;ko02020//Two-component system;ko02010//ABC transporters;ko00670//One carbon pool by folate	-	GO:0004523//RNA-DNA hybrid ribonuclease activity;GO:0003676//nucleic acid binding	GO:0090502//RNA phosphodiester bond hydrolysis, endonucleolytic;GO:0015074//DNA integration	gi|77554831|gb|ABA97627.1|/0/retrotransposon protein, putative, Ty3-gypsy subclass [Oryza sativa Japonica Group]
LOC_Os06g38670	3885	48	28	67	113	118	167	3.18664	1.64682	up	1.32e-06	7.08e-05	ko04626//Plant-pathogen interaction	GO:0016021//integral component of membrane;GO:0016023//cytoplasmic, membrane-bounded vesicle	GO:0005524//ATP binding;GO:0004674//protein serine/threonine kinase activity	GO:0006468//protein phosphorylation	gi|255677180|dbj|BAH93601.1|/0/Os06g0586150 [Oryza sativa Japonica Group]
LOC_Os05g46020	666	7	17	17	38	43	36	1.47754	1.64621	up	0.000213896	0.00500203	ko04626//Plant-pathogen interaction	GO:0009536//plastid	GO:0043565//sequence-specific DNA binding;GO:0003700//transcription factor activity, sequence-specific DNA binding	GO:0006355//regulation of transcription, DNA-templated	gi|46394268|tpg|DAA05072.1|/1.42252e-76/TPA_inf: WRKY transcription factor 7 [Oryza sativa (japonica cultivar-group)] [Oryza sativa Japonica Group]
LOC_Os12g29220	891	7	32	23	40	65	73	2.05229	1.6448	up	0.000723866	0.0133214	-	GO:0005887//integral component of plasma membrane	GO:0051119//sugar transmembrane transporter activity	GO:0034219//carbohydrate transmembrane transport	gi|122204154|sp|Q2QR07.1|SWT13_ORYSJ/1.88228e-155/RecName: Full=Bidirectional sugar transporter SWEET13; Short=OsSWEET13
LOC_Os02g56840	894	21	40	29	89	100	68	2.56197	1.64366	up	5.28e-06	0.000236681	-	-	-	-	gi|47847859|dbj|BAD21652.1|/0/F-box family protein-like [Oryza sativa Japonica Group]
LOC_Os03g17174	699	10	12	6	23	29	28	0.972589	1.64141	up	0.00115729	0.0191642	ko01100//Metabolic pathways;ko00195//Photosynthesis	GO:0009654//photosystem II oxygen evolving complex;GO:0019898//extrinsic component of membrane;GO:0009507//chloroplast;GO:0009523//photosystem II;GO:0042651//thylakoid membrane	GO:0005509//calcium ion binding	GO:0015979//photosynthesis	gi|255674406|dbj|BAH92093.1|;gi|937908641|dbj|BAS83561.1|/1.91911e-142;1.12757e-95/Os03g0279950 [Oryza sativa Japonica Group];Os03g0279950 [Oryza sativa Japonica Group]
LOC_Os07g10840	2292	180	162	745	1846	503	589	6.06677	1.64012	up	0.00388966	0.0466369	ko00052//Galactose metabolism	-	GO:0047274//galactinol-sucrose galactosyltransferase activity	-	gi|113610702|dbj|BAF21080.1|/0/Os07g0209100 [Oryza sativa Japonica Group]
LOC_Os09g30458	2433	14	20	8	40	44	36	1.51379	1.63993	up	0.000228323	0.00528172	-	-	GO:0004252//serine-type endopeptidase activity	GO:0006508//proteolysis	gi|1002294678|ref|XP_015610772.1|/0/PREDICTED: CO(2)-response secreted protease [Oryza sativa Japonica Group]
LOC_Os02g47470	1416	52	11	26	128	42	73	2.50669	1.63825	up	0.00169174	0.0254238	ko00906//Carotenoid biosynthesis	GO:0016021//integral component of membrane;GO:0005789//endoplasmic reticulum membrane	GO:0010295//(+)-abscisic acid 8'-hydroxylase activity;GO:0020037//heme binding;GO:0005506//iron ion binding	GO:0016132//brassinosteroid biosynthetic process;GO:0055114//oxidation-reduction process;GO:0010268//brassinosteroid homeostasis;GO:0007275//multicellular organism development;GO:0046345//abscisic acid catabolic process;GO:0016125//sterol metabolic process	gi|122163981|sp|Q05JG2.1|ABAH1_ORYSJ;gi|255671195|dbj|BAH91860.1|/0;1.00874e-162/RecName: Full=Abscisic acid 8'-hydroxylase 1; Short=ABA 8'-hydroxylase 1; AltName: Full=Cytochrome P450 707A5; AltName: Full=OsABA8ox1;Os02g0703600 [Oryza sativa Japonica Group]
LOC_Os01g74490	615	28	7	37	107	30	58	2.20192	1.63499	up	0.00290864	0.0373584	ko04978//Mineral absorption	GO:0005737//cytoplasm	GO:0046914//transition metal ion binding	GO:0046916//cellular transition metal ion homeostasis;GO:0030001//metal ion transport	gi|15290146|dbj|BAB63837.1|/7.25481e-87/heavy-metal-associated domain-containing protein-like [Oryza sativa Japonica Group]
LOC_Os02g49390	5526	12.62	5	6.85	20.23	18.65	29.59	0.777256	1.63496	up	0.00383346	0.0462316	ko03440//Homologous recombination;ko00240//Pyrimidine metabolism;ko01100//Metabolic pathways;ko03460//Fanconi anemia pathway;ko02020//Two-component system;ko02010//ABC transporters;ko00670//One carbon pool by folate	-	GO:0004523//RNA-DNA hybrid ribonuclease activity;GO:0003964//RNA-directed DNA polymerase activity;GO:0003677//DNA binding;GO:0003723//RNA binding	GO:0090502//RNA phosphodiester bond hydrolysis, endonucleolytic;GO:0006278//RNA-dependent DNA biosynthetic process;GO:0015074//DNA integration;GO:0006310//DNA recombination	gi|14018058|gb|AAK52121.1|AC079936_17/0/Putative retroelement [Oryza sativa Japonica Group]
LOC_Os09g16920	1401	11	20	8	39	40	32	1.41099	1.6316	up	0.000432105	0.00877759	-	GO:0016021//integral component of membrane	GO:0016491//oxidoreductase activity	GO:0055114//oxidation-reduction process;GO:0006629//lipid metabolic process	gi|113631148|dbj|BAF24829.1|/0/Os09g0338500 [Oryza sativa Japonica Group]
LOC_Os04g39489	1401	56	52	39	186	99	124	3.2358	1.63145	up	2.01e-06	0.000103634	ko04974//Protein digestion and absorption	GO:0005886//plasma membrane;GO:0016021//integral component of membrane	GO:0015171//amino acid transmembrane transporter activity	GO:0003333//amino acid transmembrane transport	gi|38344748|emb|CAE03052.2|/5.29016e-140/OSJNBa0089K21.6 [Oryza sativa Japonica Group]
LOC_Os02g33680	1518	122	26	57	222	119	216	3.67841	1.63054	up	0.000237435	0.00542677	ko04120//Ubiquitin mediated proteolysis;ko04141//Protein processing in endoplasmic reticulum	-	-	-	gi|113536593|dbj|BAF08976.1|/0/Os02g0540700 [Oryza sativa Japonica Group]
LOC_Os06g06290	1107	82	64	152	262	246	310	4.2172	1.62859	up	1.99e-07	1.47e-05	ko00230//Purine metabolism;ko04142//Lysosome;ko01120//Microbial metabolism in diverse environments;ko01100//Metabolic pathways;ko00030//Pentose phosphate pathway;ko00906//Carotenoid biosynthesis;ko01110//Biosynthesis of secondary metabolites;ko00511//Other glycan degradation;ko00250//Alanine, aspartate and glutamate metabolism	GO:0016023//cytoplasmic, membrane-bounded vesicle	GO:0016788//hydrolase activity, acting on ester bonds	-	gi|1002277766|ref|XP_015643225.1|/0/PREDICTED: GDSL esterase/lipase At5g45910 [Oryza sativa Japonica Group]
LOC_Os08g13350	1449	6	15	12	38	29	26	1.17848	1.62778	up	0.000865832	0.0153591	-	GO:0016021//integral component of membrane	-	-	gi|113623266|dbj|BAF23211.1|;gi|937929509|dbj|BAT04425.1|/0;0/Os08g0230200 [Oryza sativa Japonica Group] ;Os08g0230200, partial [Oryza sativa Japonica Group]
LOC_Os05g48650	672	12	11	11	27	31	37	1.2062	1.62383	up	0.00030157	0.00662417	-	GO:0005739//mitochondrion	-	-	gi|125553292|gb|EAY99001.1|/1.40881e-98/hypothetical protein OsI_20960 [Oryza sativa Indica Group]
LOC_Os03g20840	3222	27	29	34	80	58	110	2.53273	1.62208	up	1.14e-05	0.000458097	ko00230//Purine metabolism;ko04623//Cytosolic DNA-sensing pathway;ko04626//Plant-pathogen interaction;ko05016//Huntington's disease;ko05169//Epstein-Barr virus infection;ko00240//Pyrimidine metabolism;ko01100//Metabolic pathways;ko03020//RNA polymerase	-	GO:0043531//ADP binding	-	gi|108707907|gb|ABF95702.1|/0/NB-ARC domain containing protein, expressed [Oryza sativa Japonica Group]
LOC_Os01g70820	852	34	64	34	150	73	144	3.09014	1.62016	up	5.1e-05	0.00153943	ko01100//Metabolic pathways;ko00195//Photosynthesis	GO:0016021//integral component of membrane;GO:0009654//photosystem II oxygen evolving complex;GO:0019898//extrinsic component of membrane	GO:0005509//calcium ion binding	GO:0015979//photosynthesis	gi|1002226478|ref|XP_015627098.1|/4.04155e-155/PREDICTED: psbP domain-containing protein 7, chloroplastic [Oryza sativa Japonica Group]
LOC_Os01g09280	1101	97	65	157	232	241	394	4.30576	1.61878	up	1.58e-06	8.33e-05	-	GO:0005634//nucleus	GO:0008270//zinc ion binding;GO:0003677//DNA binding	GO:0009723//response to ethylene;GO:0006355//regulation of transcription, DNA-templated	gi|113531785|dbj|BAF04168.1|/0/Os01g0187900 [Oryza sativa Japonica Group]
LOC_Os11g16310	1683	13	14	13	63	17	30	1.41869	1.61862	up	0.00311695	0.0392711	-	GO:0016021//integral component of membrane;GO:0016023//cytoplasmic, membrane-bounded vesicle	-	-	gi|1002304652|ref|XP_015615667.1|/0/PREDICTED: uncharacterized protein LOC4350239 isoform X1 [Oryza sativa Japonica Group]
LOC_Os07g07974	2349	68	62	78	255	144	171	3.70977	1.61759	up	1.7e-07	1.28e-05	-	-	-	-	gi|113610554|dbj|BAF20932.1|/0/Os07g0176200 [Oryza sativa Japonica Group]
LOC_Os04g57140	3696	223	178	277	887	354	596	5.39419	1.61675	up	1.84e-06	9.58e-05	-	GO:0005871//kinesin complex	GO:0008017//microtubule binding;GO:0016491//oxidoreductase activity;GO:0016887//ATPase activity;GO:0005524//ATP binding;GO:0005516//calmodulin binding;GO:0003777//microtubule motor activity	GO:0007018//microtubule-based movement;GO:0055114//oxidation-reduction process	gi|125591982|gb|EAZ32332.1|;gi|937916596|dbj|BAS91515.1|/0;0/hypothetical protein OsJ_16543 [Oryza sativa Japonica Group];Os04g0666900, partial [Oryza sativa Japonica Group]
LOC_Os06g40440	837	24	64	18	79	145	80	2.79465	1.61525	up	0.000490645	0.00965976	-	-	-	-	gi|937923617|dbj|BAS98534.1|/2.44349e-99/Os06g0606700 [Oryza sativa Japonica Group]
LOC_Os03g10090	1554	326	677	198	749	2025	692	6.2597	1.61033	up	0.000563391	0.0109009	-	GO:0005887//integral component of plasma membrane	GO:0005355//glucose transmembrane transporter activity;GO:0005351//sugar:proton symporter activity	GO:0046323//glucose import;GO:1904659//glucose transmembrane transport;GO:0015992//proton transport	gi|113547740|dbj|BAF11183.1|/0/Os03g0197100 [Oryza sativa Japonica Group]
LOC_Os06g01790	1326	17	21	9	66	42	23	1.64344	1.60973	up	0.00145245	0.0229237	-	GO:0016021//integral component of membrane;GO:0009536//plastid	-	-	gi|937920842|dbj|BAS95759.1|/0/Os06g0107100 [Oryza sativa Japonica Group]
LOC_Os01g09540	912	106	273	53	423	628	194	4.79878	1.60892	up	0.00192853	0.0279106	ko03010//Ribosome	GO:0016023//cytoplasmic, membrane-bounded vesicle	GO:0003993//acid phosphatase activity	GO:0016311//dephosphorylation	gi|125524742|gb|EAY72856.1|/1.84962e-174/hypothetical protein OsI_00725 [Oryza sativa Indica Group]
LOC_Os04g43440	2727	85	41	93	307	119	158	3.7543	1.59992	up	5.6e-05	0.00166883	ko04626//Plant-pathogen interaction	-	GO:0043531//ADP binding;GO:0005524//ATP binding	-	gi|38344648|emb|CAE02341.2|;gi|218195212|gb|EEC77639.1|/1.82401e-34;0/OSJNBb0072M01.2 [Oryza sativa Japonica Group];hypothetical protein OsI_16631 [Oryza sativa Indica Group]
LOC_Os09g25900	2097	12	12	10	31	27	35	1.18786	1.59418	up	0.000435655	0.00883098	-	GO:0000139//Golgi membrane;GO:0016021//integral component of membrane;GO:0005739//mitochondrion	GO:0016757//transferase activity, transferring glycosyl groups	GO:0071555//cell wall organization	gi|172045719|sp|Q69L19.2|CSLC2_ORYSJ/0/RecName: Full=Probable xyloglucan glycosyltransferase 2; AltName: Full=Cellulose synthase-like protein C2; AltName: Full=OsCslC2
LOC_Os01g53090	795	27	53	56	74	140	159	3.0997	1.59407	up	2.35e-05	0.000819876	-	-	-	-	gi|113533679|dbj|BAF06062.1|/2.43237e-176/Os01g0731100 [Oryza sativa Japonica Group]
LOC_Os01g68650	882	10	5	17	33	21	32	1.08748	1.59198	up	0.00243624	0.0330221	-	-	-	-	gi|125528834|gb|EAY76948.1|/5.32591e-76/hypothetical protein OsI_04906 [Oryza sativa Indica Group]
LOC_Os08g41880	1872	18	24	56	36	79	148	2.61602	1.59107	up	0.00217989	0.030379	-	-	GO:0046872//metal ion binding;GO:0003993//acid phosphatase activity	GO:0016311//dephosphorylation	gi|111036652|dbj|BAF02354.1|/0/nucleotide pyrophosphatase [Oryza sativa Japonica Group]
LOC_Os05g46240	702	11	11	14	21	31	46	1.25635	1.59042	up	0.00103495	0.0175474	-	GO:0005794//Golgi apparatus;GO:0016021//integral component of membrane;GO:0005783//endoplasmic reticulum	-	GO:0010105//negative regulation of ethylene-activated signaling pathway	gi|113579727|dbj|BAF18090.1|/5.0619e-171/Os05g0539800 [Oryza sativa Japonica Group]
LOC_Os09g21210	2223	27	33	43	135	49	92	2.69672	1.59025	up	0.000122439	0.00317284	ko02060//Phosphotransferase system (PTS);ko01120//Microbial metabolism in diverse environments;ko01100//Metabolic pathways;ko00480//Glutathione metabolism;ko00030//Pentose phosphate pathway;ko01110//Biosynthesis of secondary metabolites;ko00053//Ascorbate and aldarate metabolism	GO:0009986//cell surface	GO:0052861//glucan endo-1,3-beta-glucanase activity, C-3 substituted reducing group;GO:0042973//glucan endo-1,3-beta-D-glucosidase activity	GO:0006076//(1->3)-beta-D-glucan catabolic process	gi|1002297777|ref|XP_015612312.1|/0/PREDICTED: probable endo-1,3(4)-beta-glucanase ARB_01444 [Oryza sativa Japonica Group]
LOC_Os03g15910	396	7	8	8	18	22	23	0.676054	1.58658	up	0.00362768	0.044365	-	GO:0016021//integral component of membrane	-	-	gi|1002257027|ref|XP_015632824.1|/5.92463e-82/PREDICTED: uncharacterized protein LOC4332352 [Oryza sativa Japonica Group]
LOC_Os03g22120	2264	452	327	814	2120	766	1295	6.58734	1.58372	up	5.58e-05	0.00166595	ko00500//Starch and sucrose metabolism;ko01100//Metabolic pathways	-	GO:0016157//sucrose synthase activity	GO:0005985//sucrose metabolic process	gi|122247037|sp|Q10LP5.1|SUS4_ORYSJ;gi|108708060|gb|ABF95855.1|/0;0/RecName: Full=Sucrose synthase 4; Short=OsSUS4; AltName: Full=Sucrose-UDP glucosyltransferase 4;Sucrose synthase 2, putative, expressed [Oryza sativa Japonica Group]
LOC_Os01g04280	1317	23	27	20	104	20	63	2.16097	1.58244	up	0.00275745	0.0358974	ko04916//Melanogenesis;ko04020//Calcium signaling pathway;ko04270//Vascular smooth muscle contraction;ko05133//Pertussis;ko04744//Phototransduction;ko04626//Plant-pathogen interaction;ko04910//Insulin signaling pathway;ko04970//Salivary secretion;ko04912//GnRH signaling pathway;ko04722//Neurotrophin signaling pathway;ko05034//Alcoholism;ko05031//Amphetamine addiction;ko04745//Phototransduction - …	-	GO:0005516//calmodulin binding	GO:0006950//response to stress	gi|15528601|dbj|BAB64623.1|/0/calmodulin-binding protein -like [Oryza sativa Japonica Group]
LOC_Os01g60020	957	18	18	20	30	49	72	1.8452	1.57802	up	0.000246935	0.00560382	-	GO:0005634//nucleus	GO:0003677//DNA binding	GO:0006355//regulation of transcription, DNA-templated	gi|75268448|sp|Q52QH4.1|NAC68_ORYSJ/0/RecName: Full=NAC domain-containing protein 68; Short=ONAC068
LOC_Os07g03050	1524	53	42	81	130	115	221	3.43357	1.5773	up	6.34e-06	0.000277464	-	-	-	-	gi|218199015|gb|EEC81442.1|/0/hypothetical protein OsI_24721 [Oryza sativa Indica Group]
LOC_Os11g08100	1392	121	138	157	445	274	390	4.673	1.57597	up	3.11e-08	2.92e-06	ko00903//Limonene and pinene degradation;ko00642//Ethylbenzene degradation;ko00362//Benzoate degradation;ko00240//Pyrimidine metabolism;ko00051//Fructose and mannose metabolism;ko01120//Microbial metabolism in diverse environments;ko01100//Metabolic pathways;ko00627//Aminobenzoate degradation;ko00350//Tyrosine metabolism	GO:0016023//cytoplasmic, membrane-bounded vesicle	GO:0004190//aspartic-type endopeptidase activity	GO:0030163//protein catabolic process;GO:0006508//proteolysis	gi|62954888|gb|AAY23257.1|/0/nucellin-like aspartic protease [Oryza sativa Japonica Group]
LOC_Os03g63380	645	13	23	16	49	47	45	1.75201	1.57422	up	9.85e-05	0.00264697	-	GO:0016023//cytoplasmic, membrane-bounded vesicle	-	-	gi|108712127|gb|ABF99922.1|/3.88501e-137/expressed protein [Oryza sativa Japonica Group]
LOC_Os02g50490	1662	30	21	35	91	68	70	2.42597	1.57271	up	5.66e-06	0.000250032	ko00500//Starch and sucrose metabolism;ko00520//Amino sugar and nucleotide sugar metabolism;ko01100//Metabolic pathways;ko01110//Biosynthesis of secondary metabolites	-	GO:0008810//cellulase activity	GO:0030245//cellulose catabolic process	gi|113537593|dbj|BAF09976.1|/0/Os02g0738600 [Oryza sativa Japonica Group]
LOC_Os10g41360	1713	167	125	218	531	285	524	4.94954	1.57213	up	5.97e-07	3.61e-05	ko04140//Regulation of autophagy	GO:0005634//nucleus;GO:0005737//cytoplasm	-	-	gi|78709013|gb|ABB47988.1|/0/armadillo/beta-catenin repeat family protein, putative, expressed [Oryza sativa Japonica Group]
LOC_Os10g39140	920	123	169	103	406	298	357	4.60776	1.56808	up	1.14e-07	8.89e-06	ko00941//Flavonoid biosynthesis;ko01100//Metabolic pathways;ko01110//Biosynthesis of secondary metabolites	-	GO:0051213//dioxygenase activity;GO:0046872//metal ion binding	GO:0055114//oxidation-reduction process	gi|110289485|gb|ABG66222.1|;gi|110289486|gb|ABB47934.2|;gi|110289488|gb|AAP54811.2|/6.81622e-132;0;0/oxidoreductase, 2OG-Fe oxygenase family protein, expressed [Oryza sativa Japonica Group];oxidoreductase, 2OG-Fe oxygenase family protein, expressed [Oryza sativa Japonica Group] ;oxidoreductase, 2OG-Fe oxygenase family protein, expressed [Oryza sativa Japonica Group]
LOC_Os04g40900	1122	20	6	16	41	21	48	1.4282	1.56495	up	0.00241631	0.0328385	-	-	GO:0003677//DNA binding;GO:0004518//nuclease activity	GO:0090305//nucleic acid phosphodiester bond hydrolysis	gi|1002262974|ref|XP_015635839.1|/0/PREDICTED: uncharacterized protein LOC4336211 isoform X1 [Oryza sativa Japonica Group]
LOC_Os07g03820	2097	15	15	8	16	44	43	1.32055	1.56255	up	0.00251945	0.0336675	ko00903//Limonene and pinene degradation;ko05142//Chagas disease (American trypanosomiasis);ko05133//Pertussis;ko05145//Toxoplasmosis;ko04626//Plant-pathogen interaction;ko00642//Ethylbenzene degradation;ko00362//Benzoate degradation;ko04722//Neurotrophin signaling pathway;ko05162//Measles;ko00240//Pyrimidine metabolism;ko00051//Fructose and mannose metabolism;ko04620//Toll-like receptor signalin…	GO:0016021//integral component of membrane;GO:0016023//cytoplasmic, membrane-bounded vesicle	GO:0030246//carbohydrate binding;GO:0005524//ATP binding;GO:0004674//protein serine/threonine kinase activity	GO:0006468//protein phosphorylation	gi|28564579|dbj|BAC57688.1|/0/putative receptor-like protein kinase [Oryza sativa Japonica Group]
LOC_Os11g44560	2982	8	24	10	36	50	29	1.46856	1.56169	up	0.00202096	0.0288777	ko00903//Limonene and pinene degradation;ko05142//Chagas disease (American trypanosomiasis);ko05133//Pertussis;ko05145//Toxoplasmosis;ko00642//Ethylbenzene degradation;ko00362//Benzoate degradation;ko04722//Neurotrophin signaling pathway;ko05162//Measles;ko00240//Pyrimidine metabolism;ko00051//Fructose and mannose metabolism;ko04620//Toll-like receptor signaling pathway;ko05164//Influenza A;ko011…	-	-	-	gi|77552411|gb|ABA95208.1|/0/Protein kinase domain containing protein, expressed [Oryza sativa Japonica Group]
LOC_Os07g02120	1431	22	18	10.01	45	39	49	1.68012	1.55478	up	0.000204107	0.00486206	ko00680//Methane metabolism;ko01120//Microbial metabolism in diverse environments;ko00380//Tryptophan metabolism;ko00982//Drug metabolism - cytochrome P450	-	GO:0050660//flavin adenine dinucleotide binding;GO:0004499//N,N-dimethylaniline monooxygenase activity;GO:0050661//NADP binding	GO:0055114//oxidation-reduction process	gi|113610276|dbj|BAF20654.1|/0/Os07g0111900 [Oryza sativa Japonica Group]
LOC_Os12g25630	1203	16	9	16	20	60	30	1.40006	1.55425	up	0.0017466	0.026105	ko00910//Nitrogen metabolism;ko01120//Microbial metabolism in diverse environments;ko00920//Sulfur metabolism	GO:0005739//mitochondrion	GO:0016491//oxidoreductase activity;GO:0030151//molybdenum ion binding;GO:0043546//molybdopterin cofactor binding	GO:0042128//nitrate assimilation;GO:0055114//oxidation-reduction process	gi|113649209|dbj|BAF29721.1|/0/Os12g0442800 [Oryza sativa Japonica Group]
LOC_Os01g43160	1338	11	18	6	28	28	38	1.21202	1.55227	up	0.0025154	0.0336369	ko00500//Starch and sucrose metabolism;ko01100//Metabolic pathways;ko00040//Pentose and glucuronate interconversions	GO:0005576//extracellular region;GO:0016020//membrane;GO:0016023//cytoplasmic, membrane-bounded vesicle	GO:0004650//polygalacturonase activity	GO:0005975//carbohydrate metabolic process;GO:0071555//cell wall organization	gi|1002225017|ref|XP_015612881.1|/0/PREDICTED: probable polygalacturonase [Oryza sativa Japonica Group]
LOC_Os11g10480	1140	127	102	164	388	265	371	4.56322	1.5513	up	3.65e-08	3.3e-06	ko00980//Metabolism of xenobiotics by cytochrome P450;ko00260//Glycine, serine and threonine metabolism;ko00071//Fatty acid metabolism;ko00910//Nitrogen metabolism;ko00051//Fructose and mannose metabolism;ko01120//Microbial metabolism in diverse environments;ko01100//Metabolic pathways;ko00626//Naphthalene degradation;ko00830//Retinol metabolism;ko00040//Pentose and glucuronate interconversions;k…	GO:0005737//cytoplasm	GO:0008270//zinc ion binding;GO:0004022//alcohol dehydrogenase (NAD) activity	GO:0055114//oxidation-reduction process	gi|75326550|sp|Q75ZX4.1|ADH1_ORYSI;gi|108864135|gb|ABG22413.1|/0;1.66195e-176/RecName: Full=Alcohol dehydrogenase 1;Alcohol dehydrogenase 1, putative, expressed [Oryza sativa Japonica Group]
LOC_Os02g39330	816	41	66	47	134	116	158	3.24846	1.54913	up	1.33e-06	7.12e-05	ko00500//Starch and sucrose metabolism;ko00520//Amino sugar and nucleotide sugar metabolism;ko01100//Metabolic pathways;ko01110//Biosynthesis of secondary metabolites	GO:0016023//cytoplasmic, membrane-bounded vesicle	GO:0004568//chitinase activity;GO:0008061//chitin binding	GO:0006032//chitin catabolic process;GO:0006952//defense response;GO:0000272//polysaccharide catabolic process;GO:0016998//cell wall macromolecule catabolic process	gi|75291085|sp|Q6K8R2.1|CHI6_ORYSJ/0/RecName: Full=Chitinase 6; AltName: Full=Pathogenesis related (PR)-3 chitinase 6; Flags: Precursor
LOC_Os03g60370	1560	194	125	194	572	294	454	4.9349	1.53963	up	5.37e-07	3.32e-05	ko00562//Inositol phosphate metabolism	GO:0005774//vacuolar membrane;GO:0016023//cytoplasmic, membrane-bounded vesicle;GO:0005783//endoplasmic reticulum	GO:0003993//acid phosphatase activity	GO:0016311//dephosphorylation	gi|113550176|dbj|BAF13619.1|/0/Os03g0818100 [Oryza sativa Japonica Group]
LOC_Os02g39570	1351	130	121	121	391	276	303	4.48585	1.53893	up	7.64e-09	8.38e-07	ko00660//C5-Branched dibasic acid metabolism;ko00770//Pantothenate and CoA biosynthesis;ko00290//Valine, leucine and isoleucine biosynthesis;ko01100//Metabolic pathways;ko02010//ABC transporters;ko01110//Biosynthesis of secondary metabolites;ko00650//Butanoate metabolism	-	GO:0016597//amino acid binding;GO:0003984//acetolactate synthase activity	GO:0009082//branched-chain amino acid biosynthetic process	gi|1002247102|ref|XP_015627719.1|;gi|255671076|dbj|BAF09303.2|;gi|1002247100|ref|XP_015627718.1|/0;0;0/PREDICTED: acetolactate synthase small subunit 2, chloroplastic isoform X2 [Oryza sativa Japonica Group];Os02g0608600, partial [Oryza sativa Japonica Group];PREDICTED: acetolactate synthase small subunit 2, chloroplastic isoform X1 [Oryza sativa Japonica Group]
LOC_Os01g35050	2307	50	64	59	124	176	156	3.39755	1.53755	up	7.34e-08	6.04e-06	ko00230//Purine metabolism;ko04623//Cytosolic DNA-sensing pathway;ko05169//Epstein-Barr virus infection;ko00240//Pyrimidine metabolism;ko01100//Metabolic pathways;ko03020//RNA polymerase	GO:0016021//integral component of membrane;GO:0016023//cytoplasmic, membrane-bounded vesicle	-	-	gi|113532787|dbj|BAF05170.1|/0/Os01g0534900 [Oryza sativa Japonica Group]
LOC_Os04g58910	2817	27	21	32	71	73	63	2.29194	1.52306	up	5.59e-06	0.000248862	ko00903//Limonene and pinene degradation;ko00642//Ethylbenzene degradation;ko00362//Benzoate degradation;ko00240//Pyrimidine metabolism;ko00051//Fructose and mannose metabolism;ko01120//Microbial metabolism in diverse environments;ko01100//Metabolic pathways;ko00627//Aminobenzoate degradation;ko00350//Tyrosine metabolism	GO:0016021//integral component of membrane	GO:0005524//ATP binding;GO:0004674//protein serine/threonine kinase activity	GO:0006468//protein phosphorylation	gi|21741125|emb|CAD41925.1|/0/OSJNBa0070M12.3 [Oryza sativa Japonica Group]
LOC_Os03g13840	1449	147	91	90	370	135	329	4.28841	1.52264	up	5.86e-05	0.00172832	-	-	-	-	gi|108707105|gb|ABF94900.1|/0/Senescence-associated protein, expressed [Oryza sativa Japonica Group]
LOC_Os10g38489	702	55.25	24.81	27	97.69	62	113.77	2.69551	1.52189	up	0.000131702	0.00336288	ko00980//Metabolism of xenobiotics by cytochrome P450;ko05200//Pathways in cancer;ko00480//Glutathione metabolism;ko00982//Drug metabolism - cytochrome P450;ko05215//Prostate cancer	GO:0005737//cytoplasm	GO:0004364//glutathione transferase activity	GO:0009407//toxin catabolic process;GO:0006749//glutathione metabolic process	gi|113639733|dbj|BAF27038.1|/5.87058e-143/Os10g0528400 [Oryza sativa Japonica Group]
LOC_Os01g37410	3468	13.11	20.66	41.38	100.98	42.42	48.32	2.19947	1.52053	up	0.00162082	0.0246585	ko04978//Mineral absorption;ko03008//Ribosome biogenesis in eukaryotes;ko03018//RNA degradation	GO:0016021//integral component of membrane	GO:0003676//nucleic acid binding;GO:0008270//zinc ion binding	GO:0015074//DNA integration	gi|62734435|gb|AAX96544.1|/0/retrotransposon protein, putative, Ty1-copia sub-class [Oryza sativa Japonica Group]
LOC_Os11g07440	1647	18	13	28	27	45	79	1.8623	1.51843	up	0.00134346	0.0215372	-	-	GO:0033926//glycopeptide alpha-N-acetylgalactosaminidase activity	-	gi|113644582|dbj|BAF27723.1|/0/Os11g0175400 [Oryza sativa Japonica Group]
LOC_Os03g10950	1179	34	25	38	116	44	86	2.55316	1.51642	up	0.000210174	0.00495954	ko04075//Plant hormone signal transduction	-	GO:0046872//metal ion binding;GO:0004722//protein serine/threonine phosphatase activity	GO:0006470//protein dephosphorylation	gi|75244545|sp|Q8H063.1|P2C29_ORYSJ/0/RecName: Full=Probable protein phosphatase 2C 29; Short=OsPP2C29
LOC_Os05g37450	1122	12	13	11	48	24	21	1.20949	1.51502	up	0.00299181	0.0381709	-	-	GO:2001070//starch binding;GO:0003824//catalytic activity	-	gi|113579242|dbj|BAF17605.1|/0/Os05g0446900 [Oryza sativa Japonica Group]
LOC_Os01g71310	1590	68	81	250	346	392	277	4.54459	1.51439	up	0.000135886	0.00344201	ko00908//Zeatin biosynthesis	GO:0005615//extracellular space;GO:0016023//cytoplasmic, membrane-bounded vesicle	GO:0050660//flavin adenine dinucleotide binding;GO:0016614//oxidoreductase activity, acting on CH-OH group of donors;GO:0019139//cytokinin dehydrogenase activity	GO:0009690//cytokinin metabolic process;GO:0022900//electron transport chain	gi|75222760|sp|Q5JLP4.1|CKX4_ORYSJ/0/RecName: Full=Cytokinin dehydrogenase 4; AltName: Full=Cytokinin oxidase 4; Short=OsCKX4; Flags: Precursor
LOC_Os01g49720	714	19	11	23	40	62	35	1.71516	1.51416	up	0.000237224	0.00542677	ko00980//Metabolism of xenobiotics by cytochrome P450;ko05200//Pathways in cancer;ko00480//Glutathione metabolism;ko00982//Drug metabolism - cytochrome P450;ko05215//Prostate cancer	GO:0005739//mitochondrion	GO:0004364//glutathione transferase activity	GO:0009407//toxin catabolic process;GO:0006749//glutathione metabolic process	gi|255673577|dbj|BAF05853.2|/3.30685e-163/Os01g0692100 [Oryza sativa Japonica Group]
LOC_Os08g01310	1236	8	9	11	29	17	26	0.874209	1.51174	up	0.00345975	0.0426735	-	GO:0016021//integral component of membrane;GO:0016023//cytoplasmic, membrane-bounded vesicle	GO:0008081//phosphoric diester hydrolase activity;GO:0016301//kinase activity	GO:0006629//lipid metabolic process;GO:0016310//phosphorylation	gi|50725707|dbj|BAD33173.1|/0/MAP3K-like protein [Oryza sativa Japonica Group]
LOC_Os12g41390	1029	68	107	73	177	172	289	3.89699	1.50754	up	4.74e-06	0.000216756	ko00270//Cysteine and methionine metabolism;ko01100//Metabolic pathways;ko01110//Biosynthesis of secondary metabolites	-	GO:0046872//metal ion binding;GO:0008168//methyltransferase activity	GO:0009086//methionine biosynthetic process;GO:0032259//methylation	gi|113649739|dbj|BAF30251.1|;gi|108862938|gb|ABA99259.2|;gi|937943087|dbj|BAT17999.1|/0;6.01158e-90;0/Os12g0607000 [Oryza sativa Japonica Group];Homocysteine S-methyltransferase 3, putative, expressed [Oryza sativa Japonica Group];Os12g0607000 [Oryza sativa Japonica Group]
LOC_Os11g10770	1224	71	36	105	280	83	161	3.6304	1.50038	up	0.000688202	0.0127507	ko00230//Purine metabolism;ko04623//Cytosolic DNA-sensing pathway;ko04626//Plant-pathogen interaction;ko05016//Huntington's disease;ko05169//Epstein-Barr virus infection;ko00240//Pyrimidine metabolism;ko01100//Metabolic pathways;ko03020//RNA polymerase	GO:0016023//cytoplasmic, membrane-bounded vesicle	GO:0043531//ADP binding	-	gi|77549339|gb|ABA92136.1|/0/NB-ARC domain containing protein, expressed [Oryza sativa Japonica Group]
LOC_Os06g14400	1098	22	7	44	84	44	53	2.12312	1.49817	up	0.00301649	0.0383582	ko00941//Flavonoid biosynthesis;ko01100//Metabolic pathways;ko01110//Biosynthesis of secondary metabolites;ko00402//Benzoxazinoid biosynthesis	GO:0009536//plastid	GO:0046872//metal ion binding;GO:0051213//dioxygenase activity	GO:0055114//oxidation-reduction process	gi|113595346|dbj|BAF19220.1|/0/Os06g0255100 [Oryza sativa Japonica Group]
LOC_Os08g32980	675	209	169	197	608	349	490	5.07542	1.49792	up	1.27e-07	9.86e-06	-	-	-	-	gi|113623809|dbj|BAF23754.1|/5.2192e-88/Os08g0425800 [Oryza sativa Japonica Group]
LOC_Os06g06560	1926	205	180	270	583	671	409	5.2559	1.49481	up	2.44e-08	2.38e-06	ko00500//Starch and sucrose metabolism;ko01100//Metabolic pathways	GO:0009501//amyloplast;GO:0009570//chloroplast stroma	GO:0004373//glycogen (starch) synthase activity;GO:0033201//alpha-1,4-glucan synthase activity;GO:0009011//starch synthase activity	GO:0019252//starch biosynthetic process;GO:0010021//amylopectin biosynthetic process	gi|122168579|sp|Q0DEC8.1|SSY1_ORYSJ/0/RecName: Full=Soluble starch synthase 1, chloroplastic/amyloplastic; AltName: Full=SSS 1; AltName: Full=Starch synthase I; Flags: Precursor
LOC_Os03g40930	1329	10	11	10	30	23	26	0.99668	1.49145	up	0.00170741	0.0256392	-	-	-	-	gi|40538974|gb|AAR87231.1|/0/hypothetical protein [Oryza sativa Japonica Group]
LOC_Os08g30900	2965	16	5	23	45	34	31	1.43609	1.49015	up	0.00247809	0.0333706	-	-	GO:0042393//histone binding;GO:0008168//methyltransferase activity	GO:0032259//methylation	gi|37805966|dbj|BAC99381.1|/0/histone-lysine N-methyltransferase-like protein [Oryza sativa Japonica Group]
LOC_Os04g49060	1797	14	10	9	23	29	32	1.07399	1.48848	up	0.00153525	0.023838	-	GO:0009536//plastid	-	-	gi|1002259298|ref|XP_015633978.1|/0/PREDICTED: BTB/POZ domain-containing protein At1g63850 [Oryza sativa Japonica Group]
LOC_Os07g02490	5400	22	10.92	26.22	38.33	30.51	78.05	1.8405	1.48829	up	0.00181464	0.0268293	ko03013//RNA transport;ko03008//Ribosome biogenesis in eukaryotes;ko03018//RNA degradation	-	-	-	gi|1002311835|ref|XP_015619298.1|/0/PREDICTED: uncharacterized protein LOC107279689 [Oryza sativa Japonica Group]
LOC_Os04g03210	2934	6	9	12	18	28	23	0.812815	1.48621	up	0.00413356	0.048629	ko04626//Plant-pathogen interaction	-	GO:0016301//kinase activity	-	gi|1002260376|ref|XP_015634513.1|/0/PREDICTED: putative receptor-like protein kinase At3g47110 [Oryza sativa Japonica Group]
LOC_Os08g31090	792	36	7	42	86	44	78	2.32357	1.48386	up	0.00265322	0.0350044	-	GO:0016021//integral component of membrane;GO:0016023//cytoplasmic, membrane-bounded vesicle	-	-	gi|1002289268|ref|XP_015648931.1|/4.30743e-49/PREDICTED: uncharacterized protein LOC4345515 [Oryza sativa Japonica Group]
LOC_Os01g06640	777	17	14	10	24	36	44	1.36029	1.48208	up	0.00132209	0.0212866	-	GO:0005737//cytoplasm	GO:0046914//transition metal ion binding;GO:0046983//protein dimerization activity	GO:0046916//cellular transition metal ion homeostasis;GO:0030001//metal ion transport	gi|113531618|dbj|BAF04001.1|;gi|215741174|dbj|BAG97669.1|/1.70299e-153;2.69551e-108/Os01g0159800 [Oryza sativa Japonica Group] ;unnamed protein product [Oryza sativa Japonica Group]
LOC_Os06g08080	2304	26	38	27	79	67	83	2.4527	1.47448	up	2.48e-05	0.000858445	ko00190//Oxidative phosphorylation	GO:0005774//vacuolar membrane;GO:0016021//integral component of membrane;GO:0016023//cytoplasmic, membrane-bounded vesicle	GO:0046872//metal ion binding;GO:0009678//hydrogen-translocating pyrophosphatase activity;GO:0004427//inorganic diphosphatase activity	GO:0055085//transmembrane transport;GO:0015992//proton transport	gi|1747296|dbj|BAA08233.1|/0/vacuolar H+-pyrophosphatase [Oryza sativa Japonica Group]
LOC_Os04g05650	585	29	27	41	112	33	93	2.52259	1.4725	up	0.00102231	0.0173948	-	-	-	-	gi|38346965|emb|CAE02262.2|/2.84129e-108/OSJNBb0049I21.1 [Oryza sativa Japonica Group]
LOC_Os01g70170	1299	254	299	461	900	745	867	5.86852	1.47159	up	1.14e-07	8.89e-06	ko01120//Microbial metabolism in diverse environments;ko01100//Metabolic pathways;ko00030//Pentose phosphate pathway;ko01110//Biosynthesis of secondary metabolites;ko00511//Other glycan degradation	GO:0005739//mitochondrion;GO:0009570//chloroplast stroma	GO:0004801//sedoheptulose-7-phosphate:D-glyceraldehyde-3-phosphate glyceronetransferase activity	GO:0006098//pentose-phosphate shunt;GO:0005975//carbohydrate metabolic process;GO:0009809//lignin biosynthetic process;GO:0033587//shikimate biosynthetic process	gi|113534792|dbj|BAF07175.1|/0/Os01g0926300 [Oryza sativa Japonica Group]
LOC_Os08g06380	2859	13	11	22	37	42	36	1.49601	1.47153	up	0.000421345	0.0085863	ko00500//Starch and sucrose metabolism;ko00520//Amino sugar and nucleotide sugar metabolism;ko01100//Metabolic pathways	GO:0016021//integral component of membrane;GO:0000139//Golgi membrane	GO:0016760//cellulose synthase (UDP-forming) activity	GO:0030244//cellulose biosynthetic process;GO:0071555//cell wall organization	gi|75243376|sp|Q84UP7.1|CSLF6_ORYSJ/0/RecName: Full=Probable mixed-linked glucan synthase 6; AltName: Full=1,3;1,4-beta-D-glucan synthase 6; AltName: Full=Cellulose synthase-like protein F6; AltName: Full=OsCslF6
LOC_Os07g35290	2040	12	9	22	35	36	36	1.40144	1.47007	up	0.000859153	0.0152972	ko05142//Chagas disease (American trypanosomiasis);ko05133//Pertussis;ko05145//Toxoplasmosis;ko04626//Plant-pathogen interaction;ko04722//Neurotrophin signaling pathway;ko05162//Measles;ko04620//Toll-like receptor signaling pathway;ko05164//Influenza A;ko05140//Leishmaniasis;ko05152//Tuberculosis;ko04064//NF-kappa B signaling pathway;ko04210//Apoptosis	GO:0009506//plasmodesma;GO:0005886//plasma membrane;GO:0016021//integral component of membrane	GO:0005524//ATP binding;GO:0004674//protein serine/threonine kinase activity	GO:0006952//defense response;GO:0006468//protein phosphorylation	gi|1002285061|ref|XP_015646829.1|/0/PREDICTED: putative receptor-like protein kinase At4g00960 [Oryza sativa Japonica Group]
LOC_Os02g55560	1065	34	24	47	109	74	76	2.62638	1.46779	up	3.09e-05	0.00102911	ko04075//Plant hormone signal transduction	-	GO:0003677//DNA binding;GO:0004722//protein serine/threonine phosphatase activity;GO:0061630//ubiquitin protein ligase activity;GO:0008270//zinc ion binding	GO:0042787//protein ubiquitination involved in ubiquitin-dependent protein catabolic process;GO:0000209//protein polyubiquitination;GO:0043161//proteasome-mediated ubiquitin-dependent protein catabolic process;GO:0006470//protein dephosphorylation	gi|75289687|sp|Q69QZ0.1|P2C27_ORYSJ/0/RecName: Full=Probable protein phosphatase 2C 27; Short=OsPP2C27
LOC_Os09g15670	1077	91	49	147	240	159	298	4.03809	1.46722	up	6.6e-05	0.00191097	ko04075//Plant hormone signal transduction	-	GO:0046872//metal ion binding;GO:0004722//protein serine/threonine phosphatase activity	GO:0006470//protein dephosphorylation	gi|223635649|sp|Q0J2L7.2|P2C68_ORYSJ/0/RecName: Full=Probable protein phosphatase 2C 68; Short=OsPP2C68
LOC_Os10g04290	6456	14.36	33.03	12	64	51.05	36	1.87268	1.46682	up	0.00160414	0.0244912	ko04626//Plant-pathogen interaction	GO:0005739//mitochondrion	GO:0043531//ADP binding	-	gi|22953962|gb|AAN11195.1|/0/Putative retrotransposable elements TNP2 [Oryza sativa Japonica Group]
LOC_Os04g10530	1515	44	39	47	68	104	151	2.93442	1.46665	up	3.4e-05	0.00110958	ko01100//Metabolic pathways;ko00970//Aminoacyl-tRNA biosynthesis	GO:0016023//cytoplasmic, membrane-bounded vesicle	GO:0016884//carbon-nitrogen ligase activity, with glutamine as amido-N-donor	-	gi|255675189|dbj|BAF14102.2|/0/Os04g0184100, partial [Oryza sativa Japonica Group]
LOC_Os12g02330	372	48	113.07	66	142.1	305.7	136	3.75088	1.46638	up	0.000186519	0.00450463	-	GO:0016021//integral component of membrane;GO:0016023//cytoplasmic, membrane-bounded vesicle	GO:0008289//lipid binding	GO:0006869//lipid transport	gi|113648495|dbj|BAF29007.1|/1.99886e-57/Os12g0115300 [Oryza sativa Japonica Group]
LOC_Os08g33720	1194	111	178	279	486	547	382	5.03369	1.46636	up	3.45e-06	0.000163254	ko00710//Carbon fixation in photosynthetic organisms;ko01100//Metabolic pathways;ko00620//Pyruvate metabolism;ko00630//Glyoxylate and dicarboxylate metabolism;ko01110//Biosynthesis of secondary metabolites;ko00020//Citrate cycle (TCA cycle)	GO:0009536//plastid;GO:0005739//mitochondrion	GO:0030060//L-malate dehydrogenase activity	GO:0005975//carbohydrate metabolic process;GO:0006108//malate metabolic process;GO:0006099//tricarboxylic acid cycle	gi|1002292625|ref|XP_015650665.1|/0/PREDICTED: malate dehydrogenase, chloroplastic [Oryza sativa Japonica Group]
LOC_Os02g34600	1098	98	74	150	240	228	321	4.20902	1.46346	up	9.58e-07	5.44e-05	ko04075//Plant hormone signal transduction	GO:0005737//cytoplasm;GO:0005634//nucleus	GO:0005524//ATP binding;GO:0004674//protein serine/threonine kinase activity	GO:0035556//intracellular signal transduction;GO:0006468//protein phosphorylation	gi|723219882|gb|AIX87958.1|;gi|71153745|sp|Q6ZI44.1|SAPK6_ORYSJ/1.84017e-149;0/CAMK like protein [Oryza sativa Indica Group];RecName: Full=Serine/threonine-protein kinase SAPK6; AltName: Full=Osmotic stress/abscisic acid-activated protein kinase 6
LOC_Os04g51040	2283	31	64	27	108	122	79	2.8668	1.45814	up	0.000161414	0.0039531	ko00903//Limonene and pinene degradation;ko05142//Chagas disease (American trypanosomiasis);ko05133//Pertussis;ko05145//Toxoplasmosis;ko00642//Ethylbenzene degradation;ko00362//Benzoate degradation;ko04722//Neurotrophin signaling pathway;ko05162//Measles;ko00240//Pyrimidine metabolism;ko00051//Fructose and mannose metabolism;ko04620//Toll-like receptor signaling pathway;ko05164//Influenza A;ko011…	GO:0016021//integral component of membrane;GO:0016023//cytoplasmic, membrane-bounded vesicle;GO:0005886//plasma membrane	GO:0004674//protein serine/threonine kinase activity;GO:0005509//calcium ion binding;GO:0030247//polysaccharide binding;GO:0005524//ATP binding	GO:0006468//protein phosphorylation;GO:0007166//cell surface receptor signaling pathway	gi|113565317|dbj|BAF15660.1|/0/Os04g0598900 [Oryza sativa Japonica Group]
LOC_Os06g01934	1593	54	50	58	141	161	100	3.23799	1.45531	up	6.79e-07	4.04e-05	-	GO:0044424	-	-	gi|113594612|dbj|BAF18486.1|/0/Os06g0108900 [Oryza sativa Japonica Group]
LOC_Os08g36480	2751	719.33	432.49	390.67	1555.82	1215.61	1017.31	6.46185	1.45334	up	9.62e-07	5.44e-05	ko00910//Nitrogen metabolism;ko00591//Linoleic acid metabolism;ko01120//Microbial metabolism in diverse environments;ko01100//Metabolic pathways;ko00920//Sulfur metabolism	-	GO:0009703//nitrate reductase (NADH) activity;GO:0050464//nitrate reductase (NADPH) activity;GO:0030151//molybdenum ion binding;GO:0020037//heme binding;GO:0043546//molybdopterin cofactor binding	GO:0006809//nitric oxide biosynthetic process;GO:0042128//nitrate assimilation;GO:0022900//electron transport chain	gi|116256153|sp|P16081.3|NIA1_ORYSJ/0/RecName: Full=Nitrate reductase [NADH] 1; Short=NR1
LOC_Os06g44010	1191	29	31	26	46	71	96	2.3529	1.45223	up	0.000130718	0.00335113	ko04626//Plant-pathogen interaction	GO:0005634//nucleus	GO:0003700//transcription factor activity, sequence-specific DNA binding	GO:0006952//defense response;GO:0009685//gibberellin metabolic process	gi|1002274529|ref|XP_015641578.1|/0/PREDICTED: probable WRKY transcription factor 60 [Oryza sativa Japonica Group]
LOC_Os07g44140	1554	71	14	93.09	160	106	159	3.33529	1.45056	up	0.00173899	0.0260319	ko00908//Zeatin biosynthesis;ko01100//Metabolic pathways;ko00905//Brassinosteroid biosynthesis;ko01110//Biosynthesis of secondary metabolites	GO:0016021//integral component of membrane;GO:0016023//cytoplasmic, membrane-bounded vesicle	GO:0004497//monooxygenase activity;GO:0005506//iron ion binding;GO:0020037//heme binding;GO:0016705//oxidoreductase activity, acting on paired donors, with incorporation or reduction of molecular oxygen	GO:0055114//oxidation-reduction process	gi|113611922|dbj|BAF22300.1|/0/Os07g0635500 [Oryza sativa Japonica Group]
LOC_Os07g18120	4098	75.58	47.01	78.74	170.67	93.43	221.71	3.53198	1.44974	up	5.02e-05	0.00152924	ko01100//Metabolic pathways;ko00380//Tryptophan metabolism;ko00906//Carotenoid biosynthesis;ko01110//Biosynthesis of secondary metabolites	GO:0005829//cytosol	GO:0051537//2 iron, 2 sulfur cluster binding;GO:0009055//electron carrier activity;GO:0016614//oxidoreductase activity, acting on CH-OH group of donors;GO:0016903//oxidoreductase activity, acting on the aldehyde or oxo group of donors;GO:0004854//xanthine dehydrogenase activity;GO:0050660//flavin adenine dinucleotide binding;GO:0005506//iron ion binding	GO:0055114//oxidation-reduction process;GO:0009115//xanthine catabolic process	gi|1002286873|ref|XP_015647742.1|/0/PREDICTED: putative aldehyde oxidase-like protein isoform X1 [Oryza sativa Japonica Group]
LOC_Os12g39180	1626	29	24	40	88	52	86	2.44641	1.44857	up	8.53e-05	0.00235504	ko04978//Mineral absorption;ko04142//Lysosome	GO:0016021//integral component of membrane	GO:0005215//transporter activity	GO:0055072//iron ion homeostasis;GO:0006811//ion transport	gi|122203376|sp|Q2QN30.1|NRAM6_ORYSJ/0/RecName: Full=Metal transporter Nramp6
LOC_Os11g09280	1539	409	535	729	1228	1256	1608	6.57602	1.44832	up	2.09e-07	1.53e-05	ko04141//Protein processing in endoplasmic reticulum	GO:0005788//endoplasmic reticulum lumen;GO:0016023//cytoplasmic, membrane-bounded vesicle	GO:0003756//protein disulfide isomerase activity	GO:0009960//endosperm development;GO:0034976//response to endoplasmic reticulum stress;GO:0045454//cell redox homeostasis;GO:0034975//protein folding in endoplasmic reticulum	gi|75320151|sp|Q53LQ0.1|PDI11_ORYSJ/0/RecName: Full=Protein disulfide isomerase-like 1-1; Short=OsPDIL1-1; AltName: Full=Endosperm storage protein 2; Short=Protein ESP2; Flags: Precursor
LOC_Os03g47610	1920	39	42	35	112	119	57	2.76821	1.44706	up	4.65e-05	0.00143915	ko03410//Base excision repair;ko01100//Metabolic pathways;ko00730//Thiamine metabolism	GO:0009570//chloroplast stroma	GO:0051536//iron-sulfur cluster binding;GO:0080041//ADP-ribose pyrophosphohydrolase activity	GO:0009228//thiamine biosynthetic process	gi|113549368|dbj|BAF12811.1|/0/Os03g0679700 [Oryza sativa Japonica Group]
LOC_Os06g04280	1548	209	298	189	596	504	619	5.33071	1.44542	up	3.6e-07	2.39e-05	ko00400//Phenylalanine, tyrosine and tryptophan biosynthesis;ko01120//Microbial metabolism in diverse environments;ko01100//Metabolic pathways;ko00350//Tyrosine metabolism;ko01110//Biosynthesis of secondary metabolites;ko00401//Novobiocin biosynthesis	GO:0009536//plastid	GO:0003866//3-phosphoshikimate 1-carboxyvinyltransferase activity	GO:0033587//shikimate biosynthetic process;GO:0009423//chorismate biosynthetic process;GO:0009073//aromatic amino acid family biosynthetic process	gi|15778436|gb|AAL07437.1|AF413082_1/0/EPSP synthase [Oryza sativa]
LOC_Os09g26810	795	13	18	11	30	48	27	1.37384	1.4436	up	0.00155698	0.0240392	ko00196//Photosynthesis - antenna proteins	GO:0016021//integral component of membrane;GO:0009522//photosystem I;GO:0009941//chloroplast envelope;GO:0009535//chloroplast thylakoid membrane;GO:0010287//plastoglobule	GO:0016168//chlorophyll binding;GO:0046872//metal ion binding;GO:0031409//pigment binding	GO:0009416//response to light stimulus;GO:0018298//protein-chromophore linkage;GO:0009768//photosynthesis, light harvesting in photosystem I	gi|113631508|dbj|BAF25189.1|/0/Os09g0439500 [Oryza sativa Japonica Group]
LOC_Os02g53530	840	11	21	13	33	42	37	1.46807	1.44352	up	0.000951102	0.0164457	-	-	-	-	gi|113537814|dbj|BAF10197.1|/2.47473e-143/Os02g0775600 [Oryza sativa Japonica Group]
LOC_Os01g04630	1341	219	373	270	675	640	812	5.63645	1.44339	up	5.61e-07	3.42e-05	-	GO:0009536//plastid	GO:0016853//isomerase activity	GO:0008152//metabolic process	gi|1002233555|ref|XP_015620974.1|/0/PREDICTED: L-Ala-D/L-amino acid epimerase [Oryza sativa Japonica Group]
LOC_Os03g50280	699	18	14	24	53	21	61	1.74108	1.44334	up	0.00281382	0.0364088	-	GO:0005737//cytoplasm;GO:0005634//nucleus	GO:0017089//glycolipid transporter activity;GO:0051861//glycolipid binding	GO:0046836//glycolipid transport	gi|108710709|gb|ABF98504.1|/1.50085e-154/expressed protein [Oryza sativa Japonica Group]
LOC_Os04g42770	2820	53	26	113	235	63	154	3.43845	1.43955	up	0.00424345	0.0494064	-	-	-	-	gi|937915067|dbj|BAS89986.1|;gi|116310317|emb|CAH67333.1|/0;0/Os04g0506900 [Oryza sativa Japonica Group];OSIGBa0157A06.2 [Oryza sativa Indica Group]
LOC_Os10g07229	1212	41	69	39	99	167	106	3.12773	1.43935	up	3.24e-05	0.00106531	ko00980//Metabolism of xenobiotics by cytochrome P450;ko00260//Glycine, serine and threonine metabolism;ko00071//Fatty acid metabolism;ko00910//Nitrogen metabolism;ko00051//Fructose and mannose metabolism;ko01120//Microbial metabolism in diverse environments;ko01100//Metabolic pathways;ko00626//Naphthalene degradation;ko00830//Retinol metabolism;ko00040//Pentose and glucuronate interconversions;k…	-	GO:0008270//zinc ion binding;GO:0016491//oxidoreductase activity	GO:0055114//oxidation-reduction process	gi|113638812|dbj|BAF26117.1|/0/Os10g0159800 [Oryza sativa Japonica Group]
LOC_Os03g03700	1651	113	94	208	251	190	547	4.55024	1.43713	up	0.000361157	0.0075689	-	GO:0016021//integral component of membrane;GO:0005886//plasma membrane	GO:0005516//calmodulin binding	GO:0006952//defense response;GO:0008219//cell death;GO:0009607//response to biotic stimulus	gi|113547316|dbj|BAF10759.1|;gi|1002254455|ref|XP_015631488.1|/0;0/Os03g0129100 [Oryza sativa Japonica Group];PREDICTED: MLO protein homolog 1 isoform X2 [Oryza sativa Japonica Group]
LOC_Os01g22352	1062	48	15	40	68	107	75	2.56994	1.43682	up	0.000226782	0.00525849	ko00940//Phenylpropanoid biosynthesis;ko00360//Phenylalanine metabolism;ko01100//Metabolic pathways;ko01110//Biosynthesis of secondary metabolites	GO:0009505//plant-type cell wall;GO:0005576//extracellular region;GO:0016023//cytoplasmic, membrane-bounded vesicle	GO:0046872//metal ion binding;GO:0020037//heme binding;GO:0004601//peroxidase activity	GO:0098869//cellular oxidant detoxification;GO:0006979//response to oxidative stress;GO:0042744//hydrogen peroxide catabolic process;GO:0009664//plant-type cell wall organization;GO:0055114//oxidation-reduction process	gi|55700897|tpe|CAH69258.1|/0/TPA: class III peroxidase 15 precursor [Oryza sativa Japonica Group]
LOC_Os08g17390	1410	22	34	10	47	70	48	1.9941	1.43627	up	0.00136581	0.0218256	-	GO:0010598//NAD(P)H dehydrogenase complex (plastoquinone);GO:0009535//chloroplast thylakoid membrane	GO:0016757//transferase activity, transferring glycosyl groups	GO:0009773//photosynthetic electron transport in photosystem I	gi|113623401|dbj|BAF23346.1|/0/Os08g0276100 [Oryza sativa Japonica Group]
LOC_Os10g37180	495	153	167	91	456	312	241	4.5664	1.43616	up	1.37e-05	0.000526178	ko03010//Ribosome;ko00630//Glyoxylate and dicarboxylate metabolism;ko01110//Biosynthesis of secondary metabolites	GO:0005960//glycine cleavage complex;GO:0005739//mitochondrion	-	GO:0019464//glycine decarboxylation via glycine cleavage system	gi|152032493|sp|A2Z9B8.1|GCSH_ORYSI/7.57526e-118/RecName: Full=Glycine cleavage system H protein, mitochondrial; Flags: Precursor
LOC_Os01g49920	2094	17	11	45	59	41	74	2.0854	1.43553	up	0.00270392	0.0354897	ko04626//Plant-pathogen interaction	GO:0016021//integral component of membrane	GO:0005524//ATP binding;GO:0004674//protein serine/threonine kinase activity	GO:0006468//protein phosphorylation	gi|215704149|dbj|BAG92989.1|/0/unnamed protein product [Oryza sativa Japonica Group]
LOC_Os08g41100	951	19	36	33	55	88	74	2.37623	1.43485	up	0.000101709	0.00271639	ko00500//Starch and sucrose metabolism;ko00520//Amino sugar and nucleotide sugar metabolism;ko01100//Metabolic pathways;ko01110//Biosynthesis of secondary metabolites	GO:0016023//cytoplasmic, membrane-bounded vesicle	GO:0004568//chitinase activity	GO:0005975//carbohydrate metabolic process;GO:0006032//chitin catabolic process;GO:0016998//cell wall macromolecule catabolic process	gi|113624250|dbj|BAF24195.1|/0/Os08g0522500 [Oryza sativa Japonica Group]
LOC_Os01g59740	1047	35	27	89	155	97	108	3.10195	1.43323	up	0.000390285	0.00806477	-	GO:0016021//integral component of membrane;GO:0009536//plastid	-	-	gi|255673805|dbj|BAF06510.2|/3.40791e-151/Os01g0812900 [Oryza sativa Japonica Group]
LOC_Os04g41570	471	17	21	19	66	29	43	1.76973	1.43017	up	0.00108605	0.0182846	-	GO:0005634//nucleus	GO:0001228//transcriptional activator activity, RNA polymerase II transcription regulatory region sequence-specific binding;GO:0001046//core promoter sequence-specific DNA binding;GO:0046983//protein dimerization activity	GO:0045944//positive regulation of transcription from RNA polymerase II promoter	gi|21740790|emb|CAD41535.1|/9.66984e-115/OSJNBb0091E11.4 [Oryza sativa Japonica Group]
LOC_Os03g19520	2967	37	29	37	97	77	75	2.57927	1.4288	up	1.2e-05	0.000472462	-	GO:0009536//plastid	-	-	gi|108707753|gb|ABF95548.1|;gi|1002257332|ref|XP_015632984.1|;gi|113548374|dbj|BAF11817.1|/0;0;0/cyclin, putative, expressed [Oryza sativa Japonica Group];PREDICTED: uncharacterized protein LOC4332616 isoform X1 [Oryza sativa Japonica Group];Os03g0308200 [Oryza sativa Japonica Group]
LOC_Os06g12150	891	12	13	11	26	31	31	1.15085	1.42696	up	0.00147464	0.0232166	ko00052//Galactose metabolism;ko00400//Phenylalanine, tyrosine and tryptophan biosynthesis;ko01100//Metabolic pathways;ko00600//Sphingolipid metabolism;ko03010//Ribosome;ko00190//Oxidative phosphorylation;ko01110//Biosynthesis of secondary metabolites;ko00511//Other glycan degradation	GO:0005739//mitochondrion;GO:0009507//chloroplast	GO:0004765//shikimate kinase activity;GO:0005524//ATP binding;GO:0000287//magnesium ion binding	GO:0009423//chorismate biosynthetic process;GO:0016310//phosphorylation;GO:0019632//shikimate metabolic process;GO:0009073//aromatic amino acid family biosynthetic process	gi|937921949|dbj|BAS96866.1|;gi|75107689|sp|Q5NTH3.1|SK2_ORYSJ/2.32279e-149;0/Os06g0225800, partial [Oryza sativa Japonica Group];RecName: Full=Shikimate kinase 2, chloroplastic; Short=OsSK2; Flags: Precursor
LOC_Os03g55030	1383	144.2	143.79	106.25	358.61	395.55	210.19	4.49223	1.42524	up	1.42e-06	7.52e-05	ko00940//Phenylpropanoid biosynthesis	GO:0043231//intracellular membrane-bounded organelle	GO:0080043//quercetin 3-O-glucosyltransferase activity;GO:0080044//quercetin 7-O-glucosyltransferase activity	GO:0009813//flavonoid biosynthetic process;GO:0052696//flavonoid glucuronidation	gi|1002250825|ref|XP_015629648.1|/0/PREDICTED: uncharacterized protein LOC4334163 [Oryza sativa Japonica Group]
LOC_Os02g30650	962	35	35	25	97	80	54	2.47251	1.42293	up	8.6e-05	0.00236979	ko04978//Mineral absorption	GO:0005737//cytoplasm	GO:0046914//transition metal ion binding	GO:0046916//cellular transition metal ion homeostasis;GO:0030001//metal ion transport	gi|222622930|gb|EEE57062.1|;gi|113536465|dbj|BAF08848.1|/3.38046e-77;1.32371e-108/hypothetical protein OsJ_06872 [Oryza sativa Japonica Group];Os02g0510600 [Oryza sativa Japonica Group]
LOC_Os11g03240	1494	28.53	27.02	23	60.78	77.23	53.26	2.20411	1.42182	up	3.69e-05	0.00118798	-	GO:0016021//integral component of membrane	GO:0015297//antiporter activity;GO:0015238//drug transmembrane transporter activity	GO:0006855//drug transmembrane transport	gi|77548508|gb|ABA91305.1|/0/MATE efflux family protein, expressed [Oryza sativa Japonica Group]
LOC_Os01g51920	1107	119	101	152	270	243	374	4.39026	1.41976	up	4.51e-07	2.85e-05	ko00564//Glycerophospholipid metabolism;ko01100//Metabolic pathways	-	GO:0003700//transcription factor activity, sequence-specific DNA binding;GO:0003677//DNA binding;GO:0016301//kinase activity	GO:0006355//regulation of transcription, DNA-templated;GO:0016310//phosphorylation	gi|113533604|dbj|BAF05987.1|/0/Os01g0717000 [Oryza sativa Japonica Group]
LOC_Os03g04060	771	50	115	30	208	171	104	3.5138	1.41827	up	0.00149762	0.0234436	ko00500//Starch and sucrose metabolism;ko00520//Amino sugar and nucleotide sugar metabolism;ko01100//Metabolic pathways;ko01110//Biosynthesis of secondary metabolites	-	GO:0004568//chitinase activity	GO:0006032//chitin catabolic process;GO:0000272//polysaccharide catabolic process;GO:0016998//cell wall macromolecule catabolic process	gi|122247563|sp|Q10S66.1|CHI11_ORYSJ/4.21802e-173/RecName: Full=Chitinase 11; AltName: Full=Pathogenesis related (PR)-3 chitinase 11; Flags: Precursor
LOC_Os05g25640	1503	386	333	534	1149	757	1065	6.1299	1.41706	up	4.16e-07	2.67e-05	ko00941//Flavonoid biosynthesis;ko00940//Phenylpropanoid biosynthesis;ko00360//Phenylalanine metabolism;ko01100//Metabolic pathways;ko00945//Stilbenoid, diarylheptanoid and gingerol biosynthesis;ko01110//Biosynthesis of secondary metabolites	GO:0016020//membrane;GO:0016023//cytoplasmic, membrane-bounded vesicle	GO:0016710//trans-cinnamate 4-monooxygenase activity;GO:0005506//iron ion binding;GO:0020037//heme binding	GO:0044550//secondary metabolite biosynthetic process;GO:0009808//lignin metabolic process;GO:0055114//oxidation-reduction process	gi|113578741|dbj|BAF17104.1|/0/Os05g0320700 [Oryza sativa Japonica Group]
LOC_Os01g13690	1009	351	857	247	1272	1333	1004	6.39576	1.41649	up	0.000486149	0.00958109	ko00770//Pantothenate and CoA biosynthesis;ko00790//Folate biosynthesis;ko00966//Glucosinolate biosynthesis;ko00290//Valine, leucine and isoleucine biosynthesis;ko01100//Metabolic pathways;ko03010//Ribosome;ko00280//Valine, leucine and isoleucine degradation;ko01110//Biosynthesis of secondary metabolites	-	GO:0008483//transaminase activity	GO:0008152//metabolic process	gi|56784110|dbj|BAD81481.1|;gi|215737454|dbj|BAG96584.1|/0;3.20894e-32/branched-chain amino acid aminotransferase -like [Oryza sativa Japonica Group];unnamed protein product [Oryza sativa Japonica Group]
LOC_Os02g51350	1281	145	77	287	461	237	484	4.81289	1.4124	up	0.000536588	0.0104569	-	-	-	-	gi|46390943|dbj|BAD16457.1|/0/kelch repeat-containing F-box-like [Oryza sativa Japonica Group]
LOC_Os06g42560	1467	56	71	65	130	156	176	3.45467	1.41165	up	6.41e-07	3.87e-05	ko00260//Glycine, serine and threonine metabolism;ko00400//Phenylalanine, tyrosine and tryptophan biosynthesis;ko01100//Metabolic pathways;ko01110//Biosynthesis of secondary metabolites	GO:0005737//cytoplasm	GO:0004834//tryptophan synthase activity;GO:0030170//pyridoxal phosphate binding;GO:0052684//L-serine hydro-lyase (adding indole, L-tryptophan-forming) activity	GO:0000162//tryptophan biosynthetic process	gi|937923818|dbj|BAS98735.1|;gi|125556163|gb|EAZ01769.1|;gi|1002279355|ref|XP_015643992.1|;gi|937923819|dbj|BAS98736.1|/0;0;0;0/Os06g0632200 [Oryza sativa Japonica Group];hypothetical protein OsI_23796 [Oryza sativa Indica Group];PREDICTED: tryptophan synthase beta chain 2 isoform X2 [Oryza sativa Japonica Group];Os06g0632200 [Oryza sativa Japonica Group]
LOC_Os09g29940	1414	59	56	139	232	147	218	3.82967	1.41158	up	9.4e-05	0.0025432	-	GO:0016021//integral component of membrane;GO:0005737//cytoplasm	-	-	gi|1002293808|ref|XP_015651233.1|;gi|215706389|dbj|BAG93245.1|/0;0/PREDICTED: uncharacterized protein At1g04910 [Oryza sativa Japonica Group];unnamed protein product [Oryza sativa Japonica Group]
LOC_Os04g35520	1080	122	117	74	180	309	270	4.15405	1.4115	up	3.03e-06	0.000146416	ko00480//Glutathione metabolism;ko00053//Ascorbate and aldarate metabolism	GO:0009570//chloroplast stroma;GO:0016021//integral component of membrane	GO:0046872//metal ion binding;GO:0020037//heme binding;GO:0016688//L-ascorbate peroxidase activity	GO:0098869//cellular oxidant detoxification;GO:0006979//response to oxidative stress;GO:0042744//hydrogen peroxide catabolic process;GO:0055114//oxidation-reduction process	gi|75232661|sp|Q7XJ02.1|APX7_ORYSJ/0/RecName: Full=Probable L-ascorbate peroxidase 7, chloroplastic; AltName: Full=OsAPx07; Flags: Precursor
LOC_Os12g10580	1476	5622.05	10530.1	6476.69	18112.2	19394.3	17562.7	10.3284	1.41097	up	1.29e-06	6.94e-05	ko00710//Carbon fixation in photosynthetic organisms;ko01120//Microbial metabolism in diverse environments;ko01100//Metabolic pathways;ko00630//Glyoxylate and dicarboxylate metabolism	GO:0009507//chloroplast	GO:0016984//ribulose-bisphosphate carboxylase activity;GO:0004497//monooxygenase activity;GO:0000287//magnesium ion binding;GO:0000166//nucleotide binding	GO:0019253//reductive pentose-phosphate cycle;GO:0009853//photorespiration;GO:0055114//oxidation-reduction process	gi|108862318|gb|ABA96140.2|/0/Ribulose bisphosphate carboxylase large chain precursor, putative [Oryza sativa Japonica Group]
LOC_Os06g46284	2658	22	35	31	49	70	93	2.358	1.40999	up	0.000213463	0.004998	ko00052//Galactose metabolism;ko00740//Riboflavin metabolism;ko00500//Starch and sucrose metabolism;ko01100//Metabolic pathways	GO:0009505//plant-type cell wall;GO:0005773//vacuole;GO:0048046//apoplast;GO:0016023//cytoplasmic, membrane-bounded vesicle	GO:0032450//maltose alpha-glucosidase activity;GO:0030246//carbohydrate binding;GO:0004558//alpha-1,4-glucosidase activity	GO:0000023//maltose metabolic process	gi|75114635|sp|Q653V7.1|AGLU_ORYSJ/0/RecName: Full=Probable alpha-glucosidase Os06g0675700; AltName: Full=Maltase; Flags: Precursor
LOC_Os02g17330	1170	63	59	39	133	119	134	3.20397	1.40783	up	4.08e-06	0.000189272	ko00770//Pantothenate and CoA biosynthesis;ko00790//Folate biosynthesis;ko00966//Glucosinolate biosynthesis;ko00290//Valine, leucine and isoleucine biosynthesis;ko01100//Metabolic pathways;ko03010//Ribosome;ko00280//Valine, leucine and isoleucine degradation;ko01110//Biosynthesis of secondary metabolites	GO:0009570//chloroplast stroma	GO:0008483//transaminase activity	GO:0008153//para-aminobenzoic acid biosynthetic process	gi|113536062|dbj|BAF08445.1|/0/Os02g0273100 [Oryza sativa Japonica Group]
LOC_Os08g24750	1791	70	15	136	179	175	160	3.60674	1.40753	up	0.00359185	0.044011	-	GO:0005794//Golgi apparatus;GO:0016021//integral component of membrane	GO:0008107//galactoside 2-alpha-L-fucosyltransferase activity	GO:0036065//fucosylation;GO:0009969//xyloglucan biosynthetic process;GO:0009832//plant-type cell wall biogenesis	gi|113623543|dbj|BAF23488.1|/0/Os08g0334900 [Oryza sativa Japonica Group]
LOC_Os03g12620	1293	15	23	34	60	69	44	2.06886	1.40753	up	0.000328104	0.00706142	-	GO:0046658//anchored component of plasma membrane	GO:0004553//hydrolase activity, hydrolyzing O-glycosyl compounds;GO:0030247//polysaccharide binding	GO:0005975//carbohydrate metabolic process	gi|1002255817|ref|XP_015632190.1|;gi|1002255821|ref|XP_015632192.1|/0;0/PREDICTED: glucan endo-1,3-beta-glucosidase 7 isoform X1 [Oryza sativa Japonica Group];PREDICTED: glucan endo-1,3-beta-glucosidase 7 isoform X3 [Oryza sativa Japonica Group]
LOC_Os02g37690	1296	28	33	28	62	84	68	2.36662	1.40327	up	2.26e-05	0.000796651	ko00908//Zeatin biosynthesis;ko00944//Flavone and flavonol biosynthesis	-	GO:0035251//UDP-glucosyltransferase activity	GO:0009812//flavonoid metabolic process	gi|937904437|dbj|BAS79491.1|/0/Os02g0589400 [Oryza sativa Japonica Group]
LOC_Os07g49270	2448	895	519	949	2820	1017	1648	7.02597	1.4015	up	0.000102475	0.00272924	ko00230//Purine metabolism;ko01100//Metabolic pathways;ko01110//Biosynthesis of secondary metabolites	GO:0031307//integral component of mitochondrial outer membrane;GO:0005829//cytosol;GO:0005634//nucleus	GO:0043424//protein histidine kinase binding;GO:0003876//AMP deaminase activity;GO:0046872//metal ion binding	GO:0009793//embryo development ending in seed dormancy;GO:0032264//IMP salvage;GO:0009737//response to abscisic acid	gi|75242756|sp|Q84NP7.1|AMPD_ORYSJ/0/RecName: Full=Probable AMP deaminase
LOC_Os06g29180	1131	153	135	133	348	277	372	4.56244	1.40137	up	8.5e-08	6.79e-06	ko00680//Methane metabolism;ko01120//Microbial metabolism in diverse environments;ko01100//Metabolic pathways;ko00630//Glyoxylate and dicarboxylate metabolism	GO:0005739//mitochondrion	GO:0051287//NAD binding;GO:0004617//phosphoglycerate dehydrogenase activity;GO:0008863//formate dehydrogenase (NAD+) activity	GO:0042183//formate catabolic process;GO:0055114//oxidation-reduction process;GO:0009070//serine family amino acid biosynthetic process	gi|109909540|sp|Q9SXP2.2|FDH1_ORYSJ/0/RecName: Full=Formate dehydrogenase 1, mitochondrial; Short=FDH 1; AltName: Full=NAD-dependent formate dehydrogenase 1; Flags: Precursor
LOC_Os02g12380	1529	50	23.83	68.69	103.12	109.59	121.18	2.99807	1.3983	up	6.1e-05	0.00178169	ko05200//Pathways in cancer;ko05016//Huntington's disease;ko05034//Alcoholism;ko05031//Amphetamine addiction;ko04330//Notch signaling pathway;ko05169//Epstein-Barr virus infection;ko04110//Cell cycle;ko05202//Transcriptional misregulation in cancer;ko05220//Chronic myeloid leukemia	GO:0005634//nucleus	GO:0032041//NAD-dependent histone deacetylase activity (H3-K14 specific)	GO:0006355//regulation of transcription, DNA-templated;GO:0070932//histone H3 deacetylation	gi|31324095|gb|AAP47172.1|;gi|937902577|dbj|BAS77631.1|;gi|1002247149|ref|XP_015627744.1|/0;0;0/histone deacetylase HDAC2 [Oryza sativa Japonica Group];Os02g0215200 [Oryza sativa Japonica Group];PREDICTED: probable histone deacetylase 19 isoform X2 [Oryza sativa Japonica Group]
LOC_Os04g33460	1128	180	156	228	621	451	257	4.96873	1.39465	up	1.19e-05	0.000470085	ko00500//Starch and sucrose metabolism;ko01100//Metabolic pathways	-	GO:0004553//hydrolase activity, hydrolyzing O-glycosyl compounds;GO:0043169//cation binding;GO:0003844//1,4-alpha-glucan branching enzyme activity	GO:0005978//glycogen biosynthetic process	gi|70664017|emb|CAJ14997.1|/0/OSJNBa0042I15.21 [Oryza sativa Japonica Group]
LOC_Os01g67420	2322	34	21	26	104	33	52	2.2173	1.39445	up	0.00214493	0.0300228	ko04723//Retrograde endocannabinoid signaling;ko04745//Phototransduction - fly	GO:0016021//integral component of membrane	GO:0016787//hydrolase activity	GO:0006629//lipid metabolic process	gi|218189541|gb|EEC71968.1|/0/hypothetical protein OsI_04804 [Oryza sativa Indica Group]
LOC_Os02g44770	2925	13	23	23	68	27	44	1.79135	1.39185	up	0.00272785	0.0356485	-	GO:0005886//plasma membrane;GO:0016021//integral component of membrane	GO:0008381//mechanically-gated ion channel activity	GO:0006820//anion transport;GO:0034220//ion transmembrane transport	gi|50252134|dbj|BAD28130.1|/0/mechanosensitive ion channel domain-containing protein-like [Oryza sativa Japonica Group]
LOC_Os02g15750	1437	217	381	190	747	675	474	5.47833	1.39123	up	1.94e-05	0.000705247	-	GO:0009536//plastid	-	-	gi|50252031|dbj|BAD27963.1|/8.88331e-158/hydroxyproline-rich glycoprotein-like [Oryza sativa Japonica Group]
LOC_Os01g64790	1056	23	10	25	50	23	61	1.74386	1.38868	up	0.00404408	0.0477226	-	-	-	-	gi|56784771|dbj|BAD81992.1|/3.49371e-122/AP2 domain transcription factor-like [Oryza sativa Japonica Group]
LOC_Os02g01100	1717	64	55	70	165	106	169	3.40329	1.38402	up	5.44e-06	0.000243089	ko05033//Nicotine addiction;ko04721//Synaptic vesicle cycle;ko04727//GABAergic synapse;ko04723//Retrograde endocannabinoid signaling;ko05032//Morphine addiction	GO:0016021//integral component of membrane	GO:0015171//amino acid transmembrane transporter activity	GO:0003333//amino acid transmembrane transport	gi|1002246511|ref|XP_015627435.1|;gi|113535116|dbj|BAF07499.1|/0;0/PREDICTED: vacuolar amino acid transporter 1 isoform X1 [Oryza sativa Japonica Group];Os02g0101000 [Oryza sativa Japonica Group]
LOC_Os11g37560	1857	18	23	24	68	46	39	1.91563	1.38282	up	0.000564443	0.0109009	-	GO:0009570//chloroplast stroma	-	-	gi|1002304127|ref|XP_015615430.1|;gi|77551654|gb|ABA94451.1|/0;0/PREDICTED: uncharacterized protein LOC4350800 isoform X2 [Oryza sativa Japonica Group];expressed protein [Oryza sativa Japonica Group]
LOC_Os01g07390	1284	39	22	36	60	82	85	2.45687	1.38178	up	5.95e-05	0.00174825	ko04120//Ubiquitin mediated proteolysis;ko04141//Protein processing in endoplasmic reticulum	GO:0016021//integral component of membrane	GO:0008270//zinc ion binding	-	gi|113531660|dbj|BAF04043.1|/0/Os01g0168400 [Oryza sativa Japonica Group]
LOC_Os05g10620	1074	26	19	23	53	24	80	1.96659	1.37871	up	0.00308555	0.0389266	-	-	-	GO:0006351//transcription, DNA-templated	gi|125551140|gb|EAY96849.1|;gi|937917745|dbj|BAS92663.1|;gi|392283548|gb|AFM54252.1|/0;0;0/hypothetical protein OsI_18770 [Oryza sativa Indica Group];Os05g0194500 [Oryza sativa Japonica Group];NAC transcription factor 85 [Oryza sativa Japonica Group]
LOC_Os02g35080	3291	50	53	68	137	133	130	3.25925	1.37853	up	8.62e-07	4.99e-05	-	-	-	-	gi|1002243311|ref|XP_015625880.1|;gi|113536663|dbj|BAF09046.1|/0;0/PREDICTED: uncharacterized protein LOC4329667 [Oryza sativa Japonica Group];Os02g0556700 [Oryza sativa Japonica Group]
LOC_Os01g08510	2301	67	79	57	209	155	114	3.51363	1.37807	up	1.34e-05	0.000517702	-	GO:0009536//plastid	-	-	gi|113531737|dbj|BAF04120.1|/0/Os01g0180300 [Oryza sativa Japonica Group]
LOC_Os07g39680	270	19	14	33	46	35	71	1.91498	1.37535	up	0.00187	0.0273942	-	-	-	-	-
LOC_Os07g35580	2091	87	131	118	252	300	240	4.22833	1.37496	up	3.17e-07	2.17e-05	ko05142//Chagas disease (American trypanosomiasis);ko05133//Pertussis;ko05145//Toxoplasmosis;ko04626//Plant-pathogen interaction;ko04722//Neurotrophin signaling pathway;ko05162//Measles;ko04620//Toll-like receptor signaling pathway;ko05164//Influenza A;ko05140//Leishmaniasis;ko05152//Tuberculosis;ko04064//NF-kappa B signaling pathway;ko04210//Apoptosis	GO:0016021//integral component of membrane;GO:0009506//plasmodesma;GO:0016023//cytoplasmic, membrane-bounded vesicle;GO:0005886//plasma membrane	GO:0004674//protein serine/threonine kinase activity;GO:0005524//ATP binding	GO:0006952//defense response;GO:0006468//protein phosphorylation	gi|113611425|dbj|BAF21803.1|/0/Os07g0540100 [Oryza sativa Japonica Group]
LOC_Os05g45210	2856	18	24	28	65	57	42	2.00947	1.37314	up	0.000276643	0.00618287	ko04626//Plant-pathogen interaction	GO:0016021//integral component of membrane	GO:0050664//oxidoreductase activity, acting on NAD(P)H, oxygen as acceptor;GO:0004601//peroxidase activity;GO:0005509//calcium ion binding	GO:0098869//cellular oxidant detoxification;GO:0055114//oxidation-reduction process	gi|113579666|dbj|BAF18029.1|/0/Os05g0528000 [Oryza sativa Japonica Group]
LOC_Os07g08430	990	137	146	98	229	333	334	4.40682	1.37099	up	1.19e-06	6.52e-05	ko00260//Glycine, serine and threonine metabolism;ko00400//Phenylalanine, tyrosine and tryptophan biosynthesis;ko01100//Metabolic pathways;ko01110//Biosynthesis of secondary metabolites	GO:0009507//chloroplast	GO:0004834//tryptophan synthase activity;GO:0030170//pyridoxal phosphate binding	GO:0000162//tryptophan biosynthetic process	gi|113610585|dbj|BAF20963.1|/1.96005e-180/Os07g0182100 [Oryza sativa Japonica Group]
LOC_Os05g51690	927	70	96	104	252	198	179	3.90783	1.37016	up	1.64e-06	8.58e-05	ko03013//RNA transport;ko03008//Ribosome biogenesis in eukaryotes;ko04712//Circadian rhythm - plant	-	-	-	gi|937920751|dbj|BAS95669.1|;gi|125553565|gb|EAY99274.1|;gi|113580065|dbj|BAF18428.1|/3.73475e-154;1.31686e-54;0/Os05g0595300 [Oryza sativa Japonica Group];hypothetical protein OsI_21238 [Oryza sativa Indica Group];Os05g0595300 [Oryza sativa Japonica Group]
LOC_Os02g50570	2721	120	60	127	358	142	198	4.06942	1.36979	up	0.00026043	0.0058615	-	GO:0016021//integral component of membrane	-	-	gi|171769899|sp|A3AB67.1|FH16_ORYSJ/0/RecName: Full=Formin-like protein 16; AltName: Full=OsFH16; Flags: Precursor
LOC_Os05g41610	1053	97	74	116	268	133	254	3.97961	1.36635	up	2.91e-05	0.000979305	-	GO:0046658//anchored component of plasma membrane;GO:0016023//cytoplasmic, membrane-bounded vesicle	GO:0030247//polysaccharide binding;GO:0042973//glucan endo-1,3-beta-D-glucosidase activity	GO:0005975//carbohydrate metabolic process	gi|113579485|dbj|BAF17848.1|/0/Os05g0495900 [Oryza sativa Japonica Group]
LOC_Os07g46790	2841	600	559	694	1715	1376	1186	6.66086	1.36365	up	5.98e-08	5.09e-06	ko00500//Starch and sucrose metabolism;ko01100//Metabolic pathways;ko02010//ABC transporters	GO:0005829//cytosol	GO:0004134//4-alpha-glucanotransferase activity;GO:0010297//heteropolysaccharide binding;GO:2001070//starch binding	GO:0000025//maltose catabolic process;GO:0005977//glycogen metabolic process	gi|222637624|gb|EEE67756.1|/0/hypothetical protein OsJ_25466 [Oryza sativa Japonica Group]
LOC_Os03g44800	1503	66	61	73	158	129	173	3.46859	1.36034	up	1.23e-06	6.68e-05	-	-	-	-	gi|108710123|gb|ABF97918.1|/0/expressed protein [Oryza sativa Japonica Group]
LOC_Os03g04110	1071	55	63	52	151	123	120	3.24584	1.35947	up	3.49e-06	0.000164922	ko04626//Plant-pathogen interaction	GO:0016021//integral component of membrane;GO:0016023//cytoplasmic, membrane-bounded vesicle;GO:0005886//plasma membrane	GO:0008061//chitin binding;GO:0043621//protein self-association	GO:0006952//defense response	gi|75244901|sp|Q8H8C7.1|CEBIP_ORYSJ/0/RecName: Full=Chitin elicitor-binding protein; Short=CEBiP; Flags: Precursor
LOC_Os02g41500	2247	13	37	19	55	64	44	2.00119	1.35873	up	0.00185519	0.0273025	ko00903//Limonene and pinene degradation;ko05142//Chagas disease (American trypanosomiasis);ko05133//Pertussis;ko05145//Toxoplasmosis;ko00642//Ethylbenzene degradation;ko00362//Benzoate degradation;ko04722//Neurotrophin signaling pathway;ko05162//Measles;ko00240//Pyrimidine metabolism;ko00051//Fructose and mannose metabolism;ko04620//Toll-like receptor signaling pathway;ko05164//Influenza A;ko011…	GO:0016021//integral component of membrane;GO:0016023//cytoplasmic, membrane-bounded vesicle;GO:0005886//plasma membrane	GO:0004674//protein serine/threonine kinase activity;GO:0005509//calcium ion binding;GO:0030247//polysaccharide binding;GO:0005524//ATP binding	GO:0006468//protein phosphorylation;GO:0007166//cell surface receptor signaling pathway	gi|1002237817|ref|XP_015623123.1|/0/PREDICTED: putative wall-associated receptor kinase-like 16 [Oryza sativa Japonica Group]
LOC_Os05g06320	1393	20	40	28	58	48	98	2.32818	1.35808	up	0.00117798	0.0194397	ko04075//Plant hormone signal transduction	GO:0016021//integral component of membrane;GO:0005789//endoplasmic reticulum membrane	GO:0046872//metal ion binding;GO:0005524//ATP binding;GO:0000155//phosphorelay sensor kinase activity	GO:0018106//peptidyl-histidine phosphorylation;GO:0023014//signal transduction by protein phosphorylation;GO:0010105//negative regulation of ethylene-activated signaling pathway	gi|937917435|dbj|BAS92353.1|;gi|1002269717|ref|XP_015639201.1|/0;0/Os05g0155200 [Oryza sativa Japonica Group];PREDICTED: probable ethylene response sensor 2 isoform X2 [Oryza sativa Japonica Group]
LOC_Os01g27750	1530	40	61	41	101	116	114	2.99622	1.35689	up	1.86e-05	0.000684378	ko00400//Phenylalanine, tyrosine and tryptophan biosynthesis;ko01100//Metabolic pathways;ko01110//Biosynthesis of secondary metabolites	-	GO:0050661//NADP binding;GO:0003855//3-dehydroquinate dehydratase activity;GO:0004764//shikimate 3-dehydrogenase (NADP+) activity	GO:0055114//oxidation-reduction process;GO:0019632//shikimate metabolic process	gi|937896224|dbj|BAS72204.1|/0/Os01g0375200 [Oryza sativa Japonica Group]
LOC_Os03g51080	1479	173	192	410	658	518	584	5.38902	1.35453	up	2.28e-05	0.00080052	ko04727//GABAergic synapse;ko04940//Type I diabetes mellitus;ko00430//Taurine and hypotaurine metabolism;ko01100//Metabolic pathways;ko00410//beta-Alanine metabolism;ko01110//Biosynthesis of secondary metabolites;ko00650//Butanoate metabolism;ko00250//Alanine, aspartate and glutamate metabolism	-	GO:0030170//pyridoxal phosphate binding;GO:0004351//glutamate decarboxylase activity	GO:0006536//glutamate metabolic process	gi|113549570|dbj|BAF13013.1|/0/Os03g0720300 [Oryza sativa Japonica Group]
LOC_Os02g40430	3516	43	33	41	77	103	90	2.70567	1.35451	up	1.06e-05	0.000427068	-	-	-	-	gi|1002244413|ref|XP_015626414.1|/0/PREDICTED: CLIP-associated protein [Oryza sativa Japonica Group]
LOC_Os03g45730	2094	226	159	324	742	310	542	5.25915	1.35389	up	0.000103504	0.00274523	ko03015//mRNA surveillance pathway	GO:0005634//nucleus	GO:0003677//DNA binding;GO:0008270//zinc ion binding	-	gi|108710206|gb|ABF98001.1|/0/Zinc knuckle family protein, expressed [Oryza sativa Japonica Group]
LOC_Os05g02060	441	26	18	24	60	63	34	1.94945	1.35245	up	0.00051843	0.010134	-	GO:0031305//integral component of mitochondrial inner membrane;GO:0005744//mitochondrial inner membrane presequence translocase complex;GO:0005773//vacuole;GO:0009707//chloroplast outer membrane	GO:0015266//protein channel activity;GO:0015171//amino acid transmembrane transporter activity	GO:0030150//protein import into mitochondrial matrix;GO:0003333//amino acid transmembrane transport;GO:0045037//protein import into chloroplast stroma	gi|113577997|dbj|BAF16360.1|/3.10314e-93/Os05g0111200 [Oryza sativa Japonica Group]
LOC_Os01g10800	3249	43	49	33	95	120	76	2.80925	1.3514	up	3.69e-05	0.00118798	ko03460//Fanconi anemia pathway	GO:0016023//cytoplasmic, membrane-bounded vesicle	GO:0008270//zinc ion binding	GO:0007275//multicellular organism development	gi|1002235069|ref|XP_015621748.1|/0/PREDICTED: pentatricopeptide repeat-containing protein DOT4, chloroplastic [Oryza sativa Japonica Group]
LOC_Os04g57610	2460	45	41	44	93	104	102	2.8542	1.35025	up	4.76e-06	0.000217314	ko04075//Plant hormone signal transduction	GO:0009536//plastid;GO:0005634//nucleus	GO:0003677//DNA binding	GO:0009734//auxin-activated signaling pathway;GO:0009908//flower development;GO:0006355//regulation of transcription, DNA-templated	gi|1002265087|ref|XP_015636872.1|/0/PREDICTED: auxin response factor 12 isoform X1 [Oryza sativa Japonica Group]
LOC_Os06g44180	1077	32	33	21	50	84	66	2.2844	1.3492	up	0.000221756	0.00516693	ko00941//Flavonoid biosynthesis;ko01100//Metabolic pathways;ko01110//Biosynthesis of secondary metabolites	-	GO:0050662//coenzyme binding;GO:0003824//catalytic activity	-	gi|113596266|dbj|BAF20140.1|/0/Os06g0651100 [Oryza sativa Japonica Group]
LOC_Os02g50330	2223	20	34	33	68	87	47	2.29748	1.34703	up	0.000355025	0.00745344	-	-	GO:0003968//RNA-directed RNA polymerase activity;GO:0003723//RNA binding	GO:0001172//transcription, RNA-templated;GO:0031047//gene silencing by RNA	gi|251765121|sp|Q0DXS3.2|RDR1_ORYSJ/0/RecName: Full=Probable RNA-dependent RNA polymerase 1; Short=OsRDR1
LOC_Os10g31220	4086	18.9	8.73	29.01	58.25	34.43	34.97	1.68005	1.34428	up	0.00394269	0.0469304	ko04978//Mineral absorption;ko00908//Zeatin biosynthesis;ko01100//Metabolic pathways;ko03008//Ribosome biogenesis in eukaryotes;ko01110//Biosynthesis of secondary metabolites;ko03018//RNA degradation	GO:0016021//integral component of membrane	GO:0003676//nucleic acid binding;GO:0008270//zinc ion binding	GO:0015074//DNA integration	gi|31432391|gb|AAP54028.1|/0/retrotransposon protein, putative, Ty1-copia subclass [Oryza sativa Japonica Group]
LOC_Os02g07170	708	25	10	28	54	30	57	1.82285	1.33989	up	0.00304538	0.0386231	ko04075//Plant hormone signal transduction	GO:0005634//nucleus	GO:0003677//DNA binding	GO:0006355//regulation of transcription, DNA-templated	gi|222622255|gb|EEE56387.1|/2.08124e-143/hypothetical protein OsJ_05533 [Oryza sativa Japonica Group]
LOC_Os07g24190	3178	192	214	214	433	396	579	5.07484	1.33845	up	5.09e-07	3.19e-05	-	GO:0005886//plasma membrane;GO:0016021//integral component of membrane	GO:0016760//cellulose synthase (UDP-forming) activity;GO:0008270//zinc ion binding	GO:0071555//cell wall organization;GO:0030244//cellulose biosynthetic process	gi|75322979|sp|Q69V23.1|CESA3_ORYSJ;gi|937926292|dbj|BAT01209.1|/0;0/RecName: Full=Probable cellulose synthase A catalytic subunit 3 [UDP-forming]; AltName: Full=OsCesA3;Os07g0424400 [Oryza sativa Japonica Group]
LOC_Os04g54830	1914	112	43	98	293	105	162	3.76644	1.33543	up	0.00114902	0.0190603	-	-	-	-	gi|937916338|dbj|BAS91257.1|/0/Os04g0640900 [Oryza sativa Japonica Group]
LOC_Os04g43760	2124	31	32	41	79	62	94	2.5288	1.33481	up	9.16e-05	0.00249495	ko00940//Phenylpropanoid biosynthesis;ko00360//Phenylalanine metabolism;ko01100//Metabolic pathways;ko01110//Biosynthesis of secondary metabolites	GO:0005737//cytoplasm	GO:0045548//phenylalanine ammonia-lyase activity;GO:0052883	GO:0009800//cinnamic acid biosynthetic process;GO:0006559//L-phenylalanine catabolic process	gi|32487851|emb|CAE05619.1|/0/OSJNBb0061C13.1 [Oryza sativa Japonica Group]
LOC_Os04g39420	801	23	15	15	56	31	33	1.59975	1.33478	up	0.00245253	0.0331429	ko00052//Galactose metabolism;ko00051//Fructose and mannose metabolism;ko00680//Methane metabolism;ko01120//Microbial metabolism in diverse environments;ko01100//Metabolic pathways;ko00030//Pentose phosphate pathway;ko01110//Biosynthesis of secondary metabolites;ko00010//Glycolysis / Gluconeogenesis	GO:0005737//cytoplasm	GO:0046872//metal ion binding;GO:0003872//6-phosphofructokinase activity;GO:0005524//ATP binding	GO:0061615//glycolytic process through fructose-6-phosphate;GO:0006002//fructose 6-phosphate metabolic process	gi|215678633|dbj|BAG92288.1|/0/unnamed protein product [Oryza sativa Japonica Group]
LOC_Os03g29240	1746	186.24	189	125.49	433	334	373.18	4.77181	1.33437	up	1.68e-06	8.74e-05	-	GO:0005623//cell	GO:0047134//protein-disulfide reductase activity	GO:0045454//cell redox homeostasis;GO:0055114//oxidation-reduction process	gi|75327654|sp|Q7Y0F2.1|NRX12_ORYSJ/0/RecName: Full=Probable nucleoredoxin 1-2; Short=OsNrx1-2
LOC_Os05g09020	585	16	24	21	38	42	59	1.79792	1.33196	up	0.000906997	0.0159419	ko04626//Plant-pathogen interaction	-	GO:0043565//sequence-specific DNA binding;GO:0003700//transcription factor activity, sequence-specific DNA binding	GO:0006355//regulation of transcription, DNA-templated	gi|323388965|gb|ADX60287.1|;gi|222630436|gb|EEE62568.1|/3.9511e-59;2.59588e-94/WRKY transcription factor, partial [Oryza sativa Japonica Group];hypothetical protein OsJ_17367 [Oryza sativa Japonica Group]
LOC_Os03g64320	3771	14	21	21	40	35	52	1.67738	1.32937	up	0.00121439	0.0198696	-	-	-	-	gi|108712232|gb|ABG00027.1|/0/expressed protein [Oryza sativa Japonica Group]
LOC_Os04g45970	661	82	57	103	124	100	310	3.70242	1.32364	up	0.00133372	0.0214379	ko00471//D-Glutamine and D-glutamate metabolism;ko00910//Nitrogen metabolism;ko00330//Arginine and proline metabolism;ko01100//Metabolic pathways;ko02010//ABC transporters;ko00250//Alanine, aspartate and glutamate metabolism;ko04964//Proximal tubule bicarbonate reclamation	GO:0005739//mitochondrion;GO:0005774//vacuolar membrane	GO:0005507//copper ion binding;GO:0008270//zinc ion binding;GO:0050897//cobalt ion binding;GO:0004353//glutamate dehydrogenase [NAD(P)+] activity;GO:0005524//ATP binding;GO:0004352//glutamate dehydrogenase (NAD+) activity	GO:0055114//oxidation-reduction process;GO:0006520//cellular amino acid metabolic process	gi|32488960|emb|CAE04341.1|;gi|81686712|dbj|BAE48298.1|/1.34375e-163;2.68747e-137/OSJNBb0038F03.5 [Oryza sativa Japonica Group];glutamate dehydrogenase 2 [Oryza sativa Japonica Group]
LOC_Os05g08640	1320	58	49	38	102	99	126	2.99313	1.32337	up	2.63e-05	0.000905727	ko00073//Cutin, suberine and wax biosynthesis	-	GO:0016747//transferase activity, transferring acyl groups other than amino-acyl groups	-	gi|113578355|dbj|BAF16718.1|/0/Os05g0179300 [Oryza sativa Japonica Group]
LOC_Os11g30210	2820	17	13	23	53	37	29	1.58664	1.32295	up	0.00234194	0.032087	ko00230//Purine metabolism;ko04623//Cytosolic DNA-sensing pathway;ko04626//Plant-pathogen interaction;ko05016//Huntington's disease;ko05169//Epstein-Barr virus infection;ko00240//Pyrimidine metabolism;ko01100//Metabolic pathways;ko03020//RNA polymerase	-	GO:0043531//ADP binding	-	gi|77550959|gb|ABA93756.1|/0/NB-ARC domain containing protein [Oryza sativa Japonica Group]
LOC_Os06g11135	960	41	39	53	94	99	106	2.86355	1.3224	up	9.46e-06	0.000389435	ko00943//Isoflavonoid biosynthesis;ko04075//Plant hormone signal transduction;ko01110//Biosynthesis of secondary metabolites	-	GO:0016787//hydrolase activity;GO:0016491//oxidoreductase activity	GO:0055114//oxidation-reduction process	gi|937921851|dbj|BAS96768.1|/0/Os06g0214850, partial [Oryza sativa Japonica Group]
LOC_Os07g35340	1391	29	21	28	43	45	86	2.11482	1.31906	up	0.00106364	0.0179862	ko00903//Limonene and pinene degradation;ko05142//Chagas disease (American trypanosomiasis);ko05133//Pertussis;ko05145//Toxoplasmosis;ko00642//Ethylbenzene degradation;ko00362//Benzoate degradation;ko04722//Neurotrophin signaling pathway;ko05162//Measles;ko00240//Pyrimidine metabolism;ko00051//Fructose and mannose metabolism;ko04620//Toll-like receptor signaling pathway;ko05164//Influenza A;ko011…	GO:0016021//integral component of membrane;GO:0009506//plasmodesma;GO:0016023//cytoplasmic, membrane-bounded vesicle;GO:0005886//plasma membrane	GO:0004674//protein serine/threonine kinase activity;GO:0005524//ATP binding	GO:0006952//defense response;GO:0006468//protein phosphorylation	gi|125558655|gb|EAZ04191.1|/0/hypothetical protein OsI_26334 [Oryza sativa Indica Group]
LOC_Os11g10760	2688	98	57	216	451	156	200	4.29287	1.31846	up	0.00418802	0.0489096	ko00903//Limonene and pinene degradation;ko00642//Ethylbenzene degradation;ko00362//Benzoate degradation;ko00240//Pyrimidine metabolism;ko00051//Fructose and mannose metabolism;ko01120//Microbial metabolism in diverse environments;ko01100//Metabolic pathways;ko00627//Aminobenzoate degradation;ko00350//Tyrosine metabolism	-	-	-	gi|77549338|gb|ABA92135.1|/0/Leucine Rich Repeat family protein, expressed [Oryza sativa Japonica Group]
LOC_Os07g40630	3321	108	82	184	275	207	342	4.3159	1.31751	up	4.33e-05	0.0013557	ko04626//Plant-pathogen interaction;ko04075//Plant hormone signal transduction	GO:0016021//integral component of membrane;GO:0016023//cytoplasmic, membrane-bounded vesicle	GO:0005524//ATP binding;GO:0004674//protein serine/threonine kinase activity	GO:0006468//protein phosphorylation	gi|113611712|dbj|BAF22090.1|/0/Os07g0597200 [Oryza sativa Japonica Group]
LOC_Os01g22900	1887	797	507	704	1685	976	1766	6.73667	1.31674	up	9.44e-06	0.000389241	-	GO:0005739//mitochondrion	GO:0004575//sucrose alpha-glucosidase activity;GO:0033926//glycopeptide alpha-N-acetylgalactosaminidase activity	GO:0005987//sucrose catabolic process	gi|125525725|gb|EAY73839.1|;gi|113532462|dbj|BAF04845.1|/0;0/hypothetical protein OsI_01715 [Oryza sativa Indica Group];Os01g0332100 [Oryza sativa Japonica Group]
LOC_Os08g44770	636	63	68	71	149	186	121	3.45457	1.31542	up	2.15e-06	0.000109888	ko04146//Peroxisome;ko05016//Huntington's disease;ko05020//Prion diseases;ko05014//Amyotrophic lateral sclerosis (ALS)	GO:0009579//thylakoid;GO:0009570//chloroplast stroma;GO:0048046//apoplast	GO:0005507//copper ion binding;GO:0008270//zinc ion binding;GO:0004784//superoxide dismutase activity	GO:0055114//oxidation-reduction process;GO:0071486//cellular response to high light intensity;GO:0019430//removal of superoxide radicals	gi|42408425|dbj|BAD09607.1|/4.95488e-105/putative superoxide dismutase [Cu-Zn], chloroplast precursor [Oryza sativa Japonica Group]
[truncated: 424 more rows]
