# Supplementary material for: Transcriptome Analysis of Rice Reveals the lncRNA–mRNA Regulatory Network in Response to Rice Black-Streaked Dwarf Virus Infection
Source: Viruses. 2020 Aug 27;12(9):951. doi: 10.3390/v12090951 (PMC7552052; doi:10.3390/v12090951)
Supplement: Supplementary file 1 [file viruses-12-00951-s001.zip › Table S5. DEmRNAs involved in the plant-pathogen interaction pathway.xlsx]

## Sheet: Sheet1
GeneID	length	JNICK1_readsCount(CK)	JNICK2_readsCount(CK)	JNICK3_readsCount(CK)	JNIRB1_readsCount(RBSDV)	JNIRB2_readsCount(RBSDV)	JNIRB3_readsCount(RBSDV)	logCPM	log2Ratio(RBSDV/CK)	Up-Down-Regulation(RBSDV/CK)	P-value	FDR	Pathway	GO Component	GO Function	GO Process	Blast nr
LOC_Os01g28500	504	7	4	5	216	311	870	4.60552	6.58452	up	3.21e-28	1.23e-24	ko04626//Plant-pathogen interaction;ko04075//Plant hormone signal transduction	GO:0005576//extracellular region;GO:0016023//cytoplasmic, membrane-bounded vesicle	-	GO:0006952//defense response;GO:0009607//response to biotic stimulus	gi|113532622|dbj|BAF05005.1|/2.75482e-123/Os01g0382400 [Oryza sativa Japonica Group]
LOC_Os04g48930	1407	0	1	0	40	1	14	0.176052	5.48432	up	0.000134477	0.00341469	ko04626//Plant-pathogen interaction	GO:0016020//membrane	-	-	gi|116309691|emb|CAH66739.1|;gi|937915711|dbj|BAS90630.1|/0;0/H0404F02.15 [Oryza sativa Indica Group];Os04g0578600, partial [Oryza sativa Japonica Group]
LOC_Os08g10310	3075	3	2	1	25	44	142	1.94712	5.21338	up	2.57e-11	5.35e-09	ko05142//Chagas disease (American trypanosomiasis);ko05133//Pertussis;ko05145//Toxoplasmosis;ko04626//Plant-pathogen interaction;ko04075//Plant hormone signal transduction;ko04722//Neurotrophin signaling pathway;ko05162//Measles;ko04620//Toll-like receptor signaling pathway;ko05164//Influenza A;ko05140//Leishmaniasis;ko05152//Tuberculosis;ko04064//NF-kappa B signaling pathway;ko04210//Apoptosis	GO:0005886//plasma membrane;GO:0016021//integral component of membrane;GO:0016023//cytoplasmic, membrane-bounded vesicle;GO:0005739//mitochondrion	GO:0005524//ATP binding;GO:0004674//protein serine/threonine kinase activity	GO:0006468//protein phosphorylation	gi|1002291248|ref|XP_015649962.1|;gi|113623192|dbj|BAF23137.1|/0;0/PREDICTED: probable LRR receptor-like serine/threonine-protein kinase At1g56140 isoform X2 [Oryza sativa Japonica Group];Os08g0203400 [Oryza sativa Japonica Group]
LOC_Os01g12420	2442	2	0	0	7	12	41	0.289317	4.83141	up	2.23e-05	0.00078886	ko05142//Chagas disease (American trypanosomiasis);ko05133//Pertussis;ko05145//Toxoplasmosis;ko04626//Plant-pathogen interaction;ko04075//Plant hormone signal transduction;ko04722//Neurotrophin signaling pathway;ko05162//Measles;ko04620//Toll-like receptor signaling pathway;ko05164//Influenza A;ko05140//Leishmaniasis;ko05152//Tuberculosis;ko04064//NF-kappa B signaling pathway;ko04210//Apoptosis	GO:0016021//integral component of membrane;GO:0016023//cytoplasmic, membrane-bounded vesicle;GO:0005886//plasma membrane	GO:0004674//protein serine/threonine kinase activity;GO:0005524//ATP binding	GO:0006468//protein phosphorylation;GO:0048544//recognition of pollen	gi|113531979|dbj|BAF04362.1|/0/Os01g0223900 [Oryza sativa Japonica Group]
LOC_Os07g03710	507	2	1	0	8	11	26	-0.0220466	3.90007	up	0.000133875	0.00340476	ko04626//Plant-pathogen interaction;ko04075//Plant hormone signal transduction	GO:0005576//extracellular region;GO:0016023//cytoplasmic, membrane-bounded vesicle	-	-	gi|937924997|dbj|BAS99913.1|/1.00022e-91/Os07g0129200, partial [Oryza sativa Japonica Group]
LOC_Os10g25090	2160	2	1	6	65	15	41	1.24721	3.88245	up	7.14e-08	5.95e-06	ko04626//Plant-pathogen interaction	GO:0016021//integral component of membrane	GO:0004672//protein kinase activity;GO:0005524//ATP binding	GO:0006468//protein phosphorylation	gi|113639111|dbj|BAF26416.1|/0/Os10g0389800 [Oryza sativa Japonica Group]
LOC_Os07g35300	1803	5	3	4	62	38	30	1.35309	3.55483	up	2.07e-10	3.64e-08	ko05142//Chagas disease (American trypanosomiasis);ko05133//Pertussis;ko05145//Toxoplasmosis;ko04626//Plant-pathogen interaction;ko04722//Neurotrophin signaling pathway;ko05162//Measles;ko04620//Toll-like receptor signaling pathway;ko05164//Influenza A;ko05140//Leishmaniasis;ko05152//Tuberculosis;ko04064//NF-kappa B signaling pathway;ko04210//Apoptosis	GO:0009506//plasmodesma;GO:0005886//plasma membrane	GO:0004674//protein serine/threonine kinase activity	GO:0006952//defense response;GO:0006468//protein phosphorylation	gi|28411831|dbj|BAC57306.1|/0/serine/threonine kinase receptor precursor-like protein [Oryza sativa Japonica Group]
LOC_Os08g40270	2220	4	6	9	56	43	94	1.90582	3.48466	up	9.77e-12	2.2e-09	ko00903//Limonene and pinene degradation;ko05142//Chagas disease (American trypanosomiasis);ko05133//Pertussis;ko05145//Toxoplasmosis;ko04626//Plant-pathogen interaction;ko00642//Ethylbenzene degradation;ko00362//Benzoate degradation;ko04075//Plant hormone signal transduction;ko04722//Neurotrophin signaling pathway;ko05162//Measles;ko00240//Pyrimidine metabolism;ko00051//Fructose and mannose meta…	-	GO:0005488;GO:0016301//kinase activity	-	gi|1002290014|ref|XP_015649334.1|/0/PREDICTED: uncharacterized protein LOC4346025 [Oryza sativa Japonica Group]
LOC_Os05g24780	594	2	0	15	98	30	36	1.68734	3.44751	up	7.51e-06	0.000318725	ko04626//Plant-pathogen interaction	GO:0009536//plastid	GO:0005509//calcium ion binding	-	gi|125551781|gb|EAY97490.1|/2.41556e-50/hypothetical protein OsI_19419 [Oryza sativa Indica Group]
LOC_Os01g06730	3081	9	2	11	47	34	104	1.87182	3.23876	up	2.31e-08	2.28e-06	ko04626//Plant-pathogen interaction	GO:0016021//integral component of membrane;GO:0016023//cytoplasmic, membrane-bounded vesicle	-	-	gi|1002227256|ref|XP_015630998.1|/0/PREDICTED: receptor-like protein 12 [Oryza sativa Japonica Group]
LOC_Os01g21960	1551	0	3	1	16	9	12	-0.204157	3.23226	up	0.000828126	0.0148551	ko05142//Chagas disease (American trypanosomiasis);ko05133//Pertussis;ko05145//Toxoplasmosis;ko04626//Plant-pathogen interaction;ko04722//Neurotrophin signaling pathway;ko05162//Measles;ko04620//Toll-like receptor signaling pathway;ko05164//Influenza A;ko05140//Leishmaniasis;ko05152//Tuberculosis;ko04064//NF-kappa B signaling pathway;ko04210//Apoptosis	GO:0016021//integral component of membrane;GO:0009536//plastid	GO:0004713//protein tyrosine kinase activity;GO:0005524//ATP binding;GO:0004674//protein serine/threonine kinase activity	GO:0006468//protein phosphorylation	gi|12328581|dbj|BAB21240.1|/0/receptor protein kinase PERK1-like protein [Oryza sativa Japonica Group]
LOC_Os03g08550	2157	8	3	7	82	23	34	1.49413	3.10456	up	5.58e-07	3.42e-05	ko04626//Plant-pathogen interaction	GO:0016021//integral component of membrane;GO:0016023//cytoplasmic, membrane-bounded vesicle	GO:0004672//protein kinase activity;GO:0005524//ATP binding	GO:0006468//protein phosphorylation	gi|1002848586|ref|XP_006649512.2|/0/PREDICTED: protein STRUBBELIG-RECEPTOR FAMILY 7-like [Oryza brachyantha]
LOC_Os10g20120	2403	2	2	1	8	11	21	-0.100905	3.05748	up	0.00091502	0.0160053	ko05142//Chagas disease (American trypanosomiasis);ko05133//Pertussis;ko05145//Toxoplasmosis;ko04626//Plant-pathogen interaction;ko04075//Plant hormone signal transduction;ko04722//Neurotrophin signaling pathway;ko05162//Measles;ko04620//Toll-like receptor signaling pathway;ko05164//Influenza A;ko05140//Leishmaniasis;ko05152//Tuberculosis;ko04064//NF-kappa B signaling pathway;ko04210//Apoptosis	GO:0005886//plasma membrane;GO:0016021//integral component of membrane	GO:0030246//carbohydrate binding;GO:0005524//ATP binding;GO:0004674//protein serine/threonine kinase activity	GO:0048544//recognition of pollen;GO:0006468//protein phosphorylation	gi|31431340|gb|AAP53135.1|/0/D-mannose binding lectin family protein, expressed [Oryza sativa Japonica Group]
LOC_Os01g05870	3198	6	5	5	41	54	28	1.31143	3.05352	up	2.66e-09	3.33e-07	ko04626//Plant-pathogen interaction	GO:0016021//integral component of membrane;GO:0016023//cytoplasmic, membrane-bounded vesicle	GO:0004674//protein serine/threonine kinase activity;GO:0003677//DNA binding;GO:0005524//ATP binding	GO:0006468//protein phosphorylation;GO:0006306//DNA methylation	gi|113531574|dbj|BAF03957.1|/0/Os01g0152000 [Oryza sativa Japonica Group]
LOC_Os06g14030	2577	78	46	83	758	234	414	4.78183	2.94829	up	1.17e-12	3.29e-10	ko04626//Plant-pathogen interaction	GO:0005887//integral component of plasma membrane	GO:0005249//voltage-gated potassium channel activity	GO:0034765//regulation of ion transmembrane transport;GO:0071805//potassium ion transmembrane transport;GO:0042391//regulation of membrane potential	gi|75114599|sp|Q653P0.1|KOR1_ORYSJ/0/RecName: Full=Potassium channel KOR1; AltName: Full=K(+) outward-rectifying channel 1
LOC_Os12g01740	1542	2	2.22	4.62	18.01	19.91	20.89	0.382783	2.83664	up	3.23e-05	0.00106431	ko05142//Chagas disease (American trypanosomiasis);ko05133//Pertussis;ko05145//Toxoplasmosis;ko04626//Plant-pathogen interaction;ko04722//Neurotrophin signaling pathway;ko05162//Measles;ko04620//Toll-like receptor signaling pathway;ko05164//Influenza A;ko05140//Leishmaniasis;ko05152//Tuberculosis;ko04064//NF-kappa B signaling pathway;ko04210//Apoptosis	GO:0016021//integral component of membrane	GO:0005524//ATP binding;GO:0004674//protein serine/threonine kinase activity	GO:0006468//protein phosphorylation	gi|222616487|gb|EEE52619.1|/0/hypothetical protein OsJ_34956 [Oryza sativa Japonica Group]
LOC_Os09g34160	2928	26	5	34	227	61	102	2.97058	2.78303	up	1.1e-06	6.06e-05	ko04626//Plant-pathogen interaction	-	-	-	gi|937934061|dbj|BAT08976.1|/0/Os09g0517200 [Oryza sativa Japonica Group]
LOC_Os01g56330	2691	10	6	4	58	27	33	1.31378	2.70029	up	9.34e-07	5.32e-05	ko00903//Limonene and pinene degradation;ko05142//Chagas disease (American trypanosomiasis);ko05133//Pertussis;ko05145//Toxoplasmosis;ko04626//Plant-pathogen interaction;ko00642//Ethylbenzene degradation;ko00362//Benzoate degradation;ko04722//Neurotrophin signaling pathway;ko05162//Measles;ko00240//Pyrimidine metabolism;ko00051//Fructose and mannose metabolism;ko04620//Toll-like receptor signalin…	GO:0016021//integral component of membrane;GO:0016023//cytoplasmic, membrane-bounded vesicle	GO:0005524//ATP binding;GO:0004674//protein serine/threonine kinase activity	GO:0006468//protein phosphorylation	gi|113533903|dbj|BAF06286.1|/0/Os01g0769700 [Oryza sativa Japonica Group]
LOC_Os05g39720	1719	17	15	21	35	84	167	2.54532	2.58547	up	5.29e-07	3.3e-05	ko04626//Plant-pathogen interaction	GO:0009536//plastid	-	-	gi|46394394|tpg|DAA05135.1|/0/TPA_inf: WRKY transcription factor 70 [Oryza sativa (indica cultivar-group)] [Oryza sativa Indica Group]
LOC_Os01g66610	2481	2	5	8	14	40	29	0.844564	2.57534	up	4.98e-05	0.00152107	ko05142//Chagas disease (American trypanosomiasis);ko05133//Pertussis;ko05145//Toxoplasmosis;ko04626//Plant-pathogen interaction;ko04075//Plant hormone signal transduction;ko04722//Neurotrophin signaling pathway;ko05162//Measles;ko04620//Toll-like receptor signaling pathway;ko05164//Influenza A;ko05140//Leishmaniasis;ko05152//Tuberculosis;ko04064//NF-kappa B signaling pathway;ko04210//Apoptosis	GO:0016021//integral component of membrane;GO:0009536//plastid;GO:0005886//plasma membrane	GO:0004674//protein serine/threonine kinase activity;GO:0005524//ATP binding	GO:0006468//protein phosphorylation;GO:0048544//recognition of pollen	gi|113534579|dbj|BAF06962.1|/0/Os01g0889900 [Oryza sativa Japonica Group]
LOC_Os07g07990	1128	4	0	20	58	19	41	1.34838	2.49311	up	0.0013617	0.02179	ko04626//Plant-pathogen interaction	GO:0016023//cytoplasmic, membrane-bounded vesicle	GO:0016301//kinase activity	GO:0016310//phosphorylation	gi|1002284784|ref|XP_015646691.1|/0/PREDICTED: leucine-rich repeat extensin-like protein 6 [Oryza sativa Japonica Group]
LOC_Os07g18240	2100	12	11	16	41	99	53	1.99751	2.43187	up	2.75e-08	2.65e-06	ko05142//Chagas disease (American trypanosomiasis);ko05133//Pertussis;ko05145//Toxoplasmosis;ko04626//Plant-pathogen interaction;ko04075//Plant hormone signal transduction;ko04722//Neurotrophin signaling pathway;ko05162//Measles;ko04620//Toll-like receptor signaling pathway;ko05164//Influenza A;ko05140//Leishmaniasis;ko05152//Tuberculosis;ko04064//NF-kappa B signaling pathway;ko04210//Apoptosis	GO:0016021//integral component of membrane	GO:0030246//carbohydrate binding;GO:0005524//ATP binding;GO:0004674//protein serine/threonine kinase activity	GO:0006468//protein phosphorylation	gi|255677673|dbj|BAH93870.1|/0/Os07g0283125 [Oryza sativa Japonica Group]
LOC_Os07g36544	2580	47	11	53	191	129	206	3.43492	2.43128	up	7.13e-09	7.86e-07	ko05142//Chagas disease (American trypanosomiasis);ko05133//Pertussis;ko05145//Toxoplasmosis;ko04626//Plant-pathogen interaction;ko04722//Neurotrophin signaling pathway;ko05162//Measles;ko04620//Toll-like receptor signaling pathway;ko05164//Influenza A;ko05140//Leishmaniasis;ko05152//Tuberculosis;ko04064//NF-kappa B signaling pathway;ko04210//Apoptosis	GO:0016021//integral component of membrane;GO:0009506//plasmodesma;GO:0016023//cytoplasmic, membrane-bounded vesicle;GO:0005886//plasma membrane	GO:0004674//protein serine/threonine kinase activity;GO:0005524//ATP binding	GO:0006952//defense response;GO:0006468//protein phosphorylation;GO:0048544//recognition of pollen	gi|1002284748|ref|XP_015646672.1|;gi|937927126|dbj|BAT02043.1|/0;0/PREDICTED: receptor-like serine/threonine-protein kinase SD1-8 isoform X2 [Oryza sativa Japonica Group];Os07g0550500 [Oryza sativa Japonica Group]
LOC_Os04g41380	2757	4	4	5	14	15	32	0.496915	2.3587	up	0.00053852	0.0104839	ko00230//Purine metabolism;ko04623//Cytosolic DNA-sensing pathway;ko04626//Plant-pathogen interaction;ko05016//Huntington's disease;ko05169//Epstein-Barr virus infection;ko00240//Pyrimidine metabolism;ko01100//Metabolic pathways;ko03020//RNA polymerase	-	-	-	gi|32483317|emb|CAE02492.1|/0/OSJNBa0076N16.15 [Oryza sativa Japonica Group]
LOC_Os03g08320	630	58	8	120	224	186	406	4.07883	2.34133	up	8.15e-05	0.00227383	ko04626//Plant-pathogen interaction;ko04075//Plant hormone signal transduction	GO:0005634//nucleus	GO:0003714//transcription corepressor activity	GO:1903507//negative regulation of nucleic acid-templated transcription;GO:2000022//regulation of jasmonic acid mediated signaling pathway;GO:0009611//response to wounding;GO:0031347//regulation of defense response;GO:0006351//transcription, DNA-templated	gi|75150198|sp|Q8GRS2.1|TI11C_ORYSJ/3.02982e-111/RecName: Full=Protein TIFY 11c; Short=OsTIFY11c; AltName: Full=Jasmonate ZIM domain-containing protein 11; Short=OsJAZ11; AltName: Full=OsJAZ2
LOC_Os08g27170	1563	4	6	14	66	14	27	1.2446	2.32357	up	0.000434613	0.00881919	ko04916//Melanogenesis;ko04020//Calcium signaling pathway;ko04270//Vascular smooth muscle contraction;ko05133//Pertussis;ko04744//Phototransduction;ko04626//Plant-pathogen interaction;ko04910//Insulin signaling pathway;ko04970//Salivary secretion;ko04912//GnRH signaling pathway;ko04722//Neurotrophin signaling pathway;ko05034//Alcoholism;ko05031//Amphetamine addiction;ko04745//Phototransduction - …	-	GO:0005516//calmodulin binding	GO:0006950//response to stress	gi|1002289249|ref|XP_015648922.1|/0/PREDICTED: protein SAR DEFICIENT 1-like [Oryza sativa Japonica Group]
LOC_Os01g28450	495	18	143	49	229	551	203	4.31206	2.29788	up	8.02e-05	0.0022432	ko04626//Plant-pathogen interaction;ko04075//Plant hormone signal transduction	GO:0005576//extracellular region;GO:0016023//cytoplasmic, membrane-bounded vesicle	-	GO:0006952//defense response;GO:0009607//response to biotic stimulus	gi|1888551|gb|AAB49685.1|/1.49414e-106/pathogenesis-related protein class 1 [Oryza sativa Indica Group]
LOC_Os08g16120	2340	9	2	4	27	23	14	0.570604	2.22499	up	0.000844487	0.0150921	ko04626//Plant-pathogen interaction	GO:0016023//cytoplasmic, membrane-bounded vesicle;GO:0009536//plastid	GO:0043531//ADP binding	-	gi|113623361|dbj|BAF23306.1|/0/Os08g0261000 [Oryza sativa Japonica Group]
LOC_Os01g40260	741	4	26	4	55	35	51	1.63751	2.15384	up	0.000670397	0.0124932	ko04626//Plant-pathogen interaction	-	GO:0043565//sequence-specific DNA binding;GO:0003700//transcription factor activity, sequence-specific DNA binding	GO:0006355//regulation of transcription, DNA-templated	gi|14588677|dbj|BAB61842.1|/5.20568e-151/WRKY transcription factor 28-like [Oryza sativa Japonica Group]
LOC_Os09g26780	699	5	15	38	28	61	136	2.28698	2.12255	up	0.00086195	0.0153186	ko04626//Plant-pathogen interaction;ko04075//Plant hormone signal transduction	GO:0005829//cytosol;GO:0005634//nucleus	GO:0003714//transcription corepressor activity	GO:1903507//negative regulation of nucleic acid-templated transcription;GO:2000022//regulation of jasmonic acid mediated signaling pathway;GO:0009611//response to wounding;GO:0006355//regulation of transcription, DNA-templated;GO:0031347//regulation of defense response	gi|75118454|sp|Q69P94.1|TI10C_ORYSJ/3.53152e-132/RecName: Full=Protein TIFY 10c; Short=OsTIFY10c; AltName: Full=Jasmonate ZIM domain-containing protein 8; Short=OsJAZ8; AltName: Full=OsJAZ7
LOC_Os11g36200	1605	8	12	7	42	19	45	1.26395	2.1153	up	9.07e-05	0.00247326	ko04626//Plant-pathogen interaction	-	GO:0016301//kinase activity	GO:0016310//phosphorylation	gi|1002303385|ref|XP_015615078.1|/0/PREDICTED: putative receptor-like protein kinase At3g47110 isoform X1 [Oryza sativa Japonica Group]
LOC_Os10g19160	3102	10	3	9	21	35	27	0.930716	2.05273	up	0.000109382	0.00288517	ko04626//Plant-pathogen interaction	-	GO:0016301//kinase activity	-	gi|937935474|dbj|BAT10388.1|/0/Os10g0337400 [Oryza sativa Japonica Group]
LOC_Os10g25290	516	24	29	31	101	75	134	2.75503	2.0398	up	1.33e-08	1.37e-06	ko04626//Plant-pathogen interaction;ko04075//Plant hormone signal transduction	GO:0005634//nucleus	GO:0003714//transcription corepressor activity	GO:1903507//negative regulation of nucleic acid-templated transcription;GO:2000022//regulation of jasmonic acid mediated signaling pathway;GO:0009611//response to wounding;GO:0006355//regulation of transcription, DNA-templated;GO:0031347//regulation of defense response	gi|75141737|sp|Q7XEZ1.1|TI11D_ORYSJ/4.81945e-109/RecName: Full=Protein TIFY 11d; Short=OsTIFY11d; AltName: Full=Jasmonate ZIM domain-containing protein 12; Short=OsJAZ12; AltName: Full=OsJAZ1
LOC_Os11g44430	1614	6	6	12	32	13	39	0.98305	1.96939	up	0.000783051	0.0142195	ko05142//Chagas disease (American trypanosomiasis);ko05133//Pertussis;ko05145//Toxoplasmosis;ko04626//Plant-pathogen interaction;ko04722//Neurotrophin signaling pathway;ko05162//Measles;ko04620//Toll-like receptor signaling pathway;ko05164//Influenza A;ko05140//Leishmaniasis;ko05152//Tuberculosis;ko04064//NF-kappa B signaling pathway;ko04210//Apoptosis	-	GO:0005524//ATP binding;GO:0004674//protein serine/threonine kinase activity	GO:0006468//protein phosphorylation	gi|77552359|gb|ABA95156.1|/0/Protein kinase domain containing protein, expressed [Oryza sativa Japonica Group]
LOC_Os01g12430	2418	27	10	25	69	41	102	2.24383	1.95235	up	1.95e-05	0.000705247	ko00903//Limonene and pinene degradation;ko05142//Chagas disease (American trypanosomiasis);ko05133//Pertussis;ko05145//Toxoplasmosis;ko04626//Plant-pathogen interaction;ko00642//Ethylbenzene degradation;ko00362//Benzoate degradation;ko04075//Plant hormone signal transduction;ko04722//Neurotrophin signaling pathway;ko05162//Measles;ko00240//Pyrimidine metabolism;ko00051//Fructose and mannose meta…	GO:0016021//integral component of membrane;GO:0016023//cytoplasmic, membrane-bounded vesicle;GO:0005886//plasma membrane	GO:0004674//protein serine/threonine kinase activity;GO:0005524//ATP binding	GO:0006468//protein phosphorylation;GO:0048544//recognition of pollen	gi|255673013|dbj|BAF04363.2|/0/Os01g0224000 [Oryza sativa Japonica Group]
LOC_Os03g17700	1110	26	40	24	112	68	129	2.77592	1.92672	up	6.66e-07	4e-05	ko05218//Melanoma;ko05160//Hepatitis C;ko05211//Renal cell carcinoma;ko04540//Gap junction;ko04725//Cholinergic synapse;ko04360//Axon guidance;ko04916//Melanogenesis;ko05142//Chagas disease (American trypanosomiasis);ko04270//Vascular smooth muscle contraction;ko05133//Pertussis;ko04062//Chemokine signaling pathway;ko05145//Toxoplasmosis;ko05221//Acute myeloid leukemia;ko04320//Dorso-ventral axis…	GO:0005622//intracellular	GO:0004707//MAP kinase activity;GO:0005524//ATP binding	GO:0010120//camalexin biosynthetic process;GO:0000169//activation of MAPK activity involved in osmosensory signaling pathway;GO:0010183//pollen tube guidance;GO:0048481//plant ovule development;GO:0010224//response to UV-B;GO:0009555//pollen development;GO:0010229//inflorescence development;GO:0006952//defense response;GO:0080136//priming of cellular response to stress	gi|122247193|sp|Q10N20.1|MPK5_ORYSJ/0/RecName: Full=Mitogen-activated protein kinase 5; Short=MAP kinase 5; AltName: Full=Benzothiadiazole-induced MAP kinase 1; AltName: Full=MAP kinase 2; AltName: Full=Multiple stress-responsive MAP kinase 2; AltName: Full=OsBIMK1; AltName: Full=OsMAP1; AltName: Full=OsMAPK2; AltName: Full=OsMAPK5; AltName: Full=OsMPK3; AltName: Full=OsMSRMK2
LOC_Os11g01740	1539	3	7.78	10.38	23.99	24.09	25.11	0.799182	1.92237	up	0.000532531	0.0103884	ko05142//Chagas disease (American trypanosomiasis);ko05133//Pertussis;ko05145//Toxoplasmosis;ko04626//Plant-pathogen interaction;ko04722//Neurotrophin signaling pathway;ko05162//Measles;ko04620//Toll-like receptor signaling pathway;ko05164//Influenza A;ko05140//Leishmaniasis;ko05152//Tuberculosis;ko04064//NF-kappa B signaling pathway;ko04210//Apoptosis	GO:0016021//integral component of membrane	GO:0005524//ATP binding;GO:0004674//protein serine/threonine kinase activity	GO:0006468//protein phosphorylation	gi|108863918|gb|ABA91125.2|/0/Protein kinase domain containing protein, expressed [Oryza sativa Japonica Group]
LOC_Os08g38990	2025	7	12	21	50	37	49	1.63036	1.91844	up	1.88e-05	0.000687304	ko04626//Plant-pathogen interaction	-	GO:0043565//sequence-specific DNA binding;GO:0003700//transcription factor activity, sequence-specific DNA binding	GO:0006355//regulation of transcription, DNA-templated	gi|58042751|gb|AAW63719.1|/0/WRKY30 [Oryza sativa Japonica Group]
LOC_Os09g18159	2028	15	21	13	40	81	49	1.91924	1.91331	up	6.43e-06	0.000280504	ko05142//Chagas disease (American trypanosomiasis);ko05133//Pertussis;ko05145//Toxoplasmosis;ko04626//Plant-pathogen interaction;ko04722//Neurotrophin signaling pathway;ko05162//Measles;ko04620//Toll-like receptor signaling pathway;ko05164//Influenza A;ko05140//Leishmaniasis;ko05152//Tuberculosis;ko04064//NF-kappa B signaling pathway;ko04210//Apoptosis	GO:0016021//integral component of membrane;GO:0016023//cytoplasmic, membrane-bounded vesicle	GO:0005524//ATP binding;GO:0004674//protein serine/threonine kinase activity	GO:0006468//protein phosphorylation	gi|1002294781|ref|XP_015610826.1|/0/PREDICTED: probable leucine-rich repeat receptor-like protein kinase At2g28990 isoform X2 [Oryza sativa Japonica Group]
LOC_Os02g17400	2883	11	14	25	62	21	83	1.9206	1.90635	up	0.000355259	0.00745344	ko04626//Plant-pathogen interaction	GO:0016021//integral component of membrane;GO:0016023//cytoplasmic, membrane-bounded vesicle	-	-	gi|1002242802|ref|XP_015625623.1|/0/PREDICTED: probable LRR receptor-like serine/threonine-protein kinase At4g36180 [Oryza sativa Japonica Group]
LOC_Os09g26660	3024	46	52	69	241	159	159	3.61397	1.901	up	8.46e-10	1.28e-07	ko04626//Plant-pathogen interaction	GO:0016021//integral component of membrane	GO:0050664//oxidoreductase activity, acting on NAD(P)H, oxygen as acceptor;GO:0004601//peroxidase activity;GO:0005509//calcium ion binding	GO:0098869//cellular oxidant detoxification;GO:0055114//oxidation-reduction process	gi|113631500|dbj|BAF25181.1|/0/Os09g0438000 [Oryza sativa Japonica Group]
LOC_Os01g04330	546	84	17	59	248	55	213	3.52182	1.8957	up	0.000528394	0.0103182	ko04626//Plant-pathogen interaction	-	GO:0005509//calcium ion binding	-	gi|75322067|sp|Q5ZCK5.1|CML16_ORYSJ/6.24251e-118/RecName: Full=Probable calcium-binding protein CML16; AltName: Full=Calmodulin-like protein 16
LOC_Os01g04580	2052	17	10	11	39	30	57	1.53635	1.88469	up	5.17e-05	0.00155795	ko05142//Chagas disease (American trypanosomiasis);ko05133//Pertussis;ko05145//Toxoplasmosis;ko04626//Plant-pathogen interaction;ko04075//Plant hormone signal transduction;ko04722//Neurotrophin signaling pathway;ko05162//Measles;ko04620//Toll-like receptor signaling pathway;ko05164//Influenza A;ko05140//Leishmaniasis;ko05152//Tuberculosis;ko04064//NF-kappa B signaling pathway;ko04210//Apoptosis	GO:0016021//integral component of membrane	GO:0030247//polysaccharide binding;GO:0005524//ATP binding;GO:0004674//protein serine/threonine kinase activity	GO:0006468//protein phosphorylation	gi|113531501|dbj|BAF03884.1|/0/Os01g0138400 [Oryza sativa Japonica Group]
LOC_Os05g04740	1528	3	7	8	26	22	12	0.554185	1.85971	up	0.00390343	0.0466369	ko04626//Plant-pathogen interaction;ko04075//Plant hormone signal transduction;ko04712//Circadian rhythm - plant	GO:0005634//nucleus	GO:0005515//protein binding	GO:0080113//regulation of seed growth;GO:0009987//cellular process	gi|1002267916|ref|XP_015638281.1|;gi|378924999|dbj|BAL63287.1|/0;1.16391e-165/PREDICTED: transcription factor APG isoform X1 [Oryza sativa Japonica Group];basic helix-loop-helix protein APG [Oryza sativa Japonica Group]
LOC_Os12g36110	2022	78	99	108	250	210	426	4.30047	1.79675	up	3.8e-08	3.42e-06	ko04916//Melanogenesis;ko04020//Calcium signaling pathway;ko04270//Vascular smooth muscle contraction;ko05133//Pertussis;ko04744//Phototransduction;ko04626//Plant-pathogen interaction;ko04910//Insulin signaling pathway;ko04970//Salivary secretion;ko04912//GnRH signaling pathway;ko04722//Neurotrophin signaling pathway;ko05034//Alcoholism;ko05031//Amphetamine addiction;ko04745//Phototransduction - …	-	GO:0005516//calmodulin binding	GO:0006950//response to stress	gi|1002314498|ref|XP_015620621.1|/0/PREDICTED: calmodulin-binding protein 60 D isoform X2 [Oryza sativa Japonica Group]
LOC_Os08g44390	762	39	15	66	147	63	152	3.03337	1.78933	up	0.000131093	0.00335626	ko04626//Plant-pathogen interaction	GO:0005737//cytoplasm	GO:0004198//calcium-dependent cysteine-type endopeptidase activity;GO:0005509//calcium ion binding	GO:0006508//proteolysis	gi|113624460|dbj|BAF24405.1|/3.04726e-115/Os08g0558100 [Oryza sativa Japonica Group]
LOC_Os03g57450	1800	13	7	9	27	35	29	1.1073	1.78825	up	0.000131442	0.00336072	ko05145//Toxoplasmosis;ko04626//Plant-pathogen interaction	GO:0005737//cytoplasm;GO:0005634//nucleus;GO:0005886//plasma membrane	GO:0005516//calmodulin binding;GO:0005509//calcium ion binding;GO:0009931//calcium-dependent protein serine/threonine kinase activity;GO:0005524//ATP binding;GO:0004683//calmodulin-dependent protein kinase activity	GO:0018105//peptidyl-serine phosphorylation;GO:0046777//protein autophosphorylation;GO:0035556//intracellular signal transduction;GO:0009738//abscisic acid-activated signaling pathway	gi|113549974|dbj|BAF13417.1|/0/Os03g0788500 [Oryza sativa Japonica Group]
LOC_Os02g41580	918	119	68	152	372	272	385	4.51498	1.77884	up	6.77e-09	7.59e-07	ko05145//Toxoplasmosis;ko04626//Plant-pathogen interaction	GO:0005737//cytoplasm;GO:0005634//nucleus;GO:0005886//plasma membrane	GO:0005516//calmodulin binding;GO:0009931//calcium-dependent protein serine/threonine kinase activity;GO:0005524//ATP binding;GO:0004683//calmodulin-dependent protein kinase activity	GO:0018105//peptidyl-serine phosphorylation;GO:0046777//protein autophosphorylation;GO:0035556//intracellular signal transduction;GO:0009738//abscisic acid-activated signaling pathway	gi|89000769|dbj|BAE80214.1|/8.52502e-172/phosphoenolpyruvate carboxylase kinase [Oryza sativa Japonica Group]
LOC_Os08g09900	2565	21	22	12	40	65	66	1.96741	1.7682	up	1.34e-05	0.000517702	ko04626//Plant-pathogen interaction	-	-	-	gi|113623171|dbj|BAF23116.1|/0/Os08g0198900 [Oryza sativa Japonica Group]
LOC_Os10g04730	1968	44	140	28	219	332	129	3.89935	1.76328	up	0.00060075	0.0114172	ko05142//Chagas disease (American trypanosomiasis);ko05133//Pertussis;ko05145//Toxoplasmosis;ko04626//Plant-pathogen interaction;ko04722//Neurotrophin signaling pathway;ko05162//Measles;ko04620//Toll-like receptor signaling pathway;ko05164//Influenza A;ko05140//Leishmaniasis;ko05152//Tuberculosis;ko04064//NF-kappa B signaling pathway;ko04210//Apoptosis	GO:0016021//integral component of membrane;GO:0009506//plasmodesma;GO:0016023//cytoplasmic, membrane-bounded vesicle;GO:0005886//plasma membrane	GO:0004674//protein serine/threonine kinase activity;GO:0005524//ATP binding	GO:0006952//defense response;GO:0006468//protein phosphorylation	gi|31430077|gb|AAP52041.1|/0/Protein kinase domain containing protein, expressed [Oryza sativa Japonica Group]
LOC_Os03g27990	2262	103	125	101	434	272	294	4.47912	1.75443	up	2.19e-09	2.84e-07	ko04626//Plant-pathogen interaction	GO:0016021//integral component of membrane	GO:0004672//protein kinase activity;GO:0005524//ATP binding	GO:0006468//protein phosphorylation	gi|937909657|dbj|BAS84577.1|/0/Os03g0397700 [Oryza sativa Japonica Group]
LOC_Os12g36910	1731	28	50	53	142	97	150	3.1421	1.72412	up	6.73e-07	4.02e-05	ko04916//Melanogenesis;ko04020//Calcium signaling pathway;ko04270//Vascular smooth muscle contraction;ko05133//Pertussis;ko04744//Phototransduction;ko04626//Plant-pathogen interaction;ko04910//Insulin signaling pathway;ko04970//Salivary secretion;ko04912//GnRH signaling pathway;ko04722//Neurotrophin signaling pathway;ko05034//Alcoholism;ko05031//Amphetamine addiction;ko04745//Phototransduction - …	-	GO:0005516//calmodulin binding	GO:0006950//response to stress	gi|113649508|dbj|BAF30020.1|/0/Os12g0556200 [Oryza sativa Japonica Group]
LOC_Os06g38670	3885	48	28	67	113	118	167	3.18664	1.64682	up	1.32e-06	7.08e-05	ko04626//Plant-pathogen interaction	GO:0016021//integral component of membrane;GO:0016023//cytoplasmic, membrane-bounded vesicle	GO:0005524//ATP binding;GO:0004674//protein serine/threonine kinase activity	GO:0006468//protein phosphorylation	gi|255677180|dbj|BAH93601.1|/0/Os06g0586150 [Oryza sativa Japonica Group]
LOC_Os05g46020	666	7	17	17	38	43	36	1.47754	1.64621	up	0.000213896	0.00500203	ko04626//Plant-pathogen interaction	GO:0009536//plastid	GO:0043565//sequence-specific DNA binding;GO:0003700//transcription factor activity, sequence-specific DNA binding	GO:0006355//regulation of transcription, DNA-templated	gi|46394268|tpg|DAA05072.1|/1.42252e-76/TPA_inf: WRKY transcription factor 7 [Oryza sativa (japonica cultivar-group)] [Oryza sativa Japonica Group]
LOC_Os03g20840	3222	27	29	34	80	58	110	2.53273	1.62208	up	1.14e-05	0.000458097	ko00230//Purine metabolism;ko04623//Cytosolic DNA-sensing pathway;ko04626//Plant-pathogen interaction;ko05016//Huntington's disease;ko05169//Epstein-Barr virus infection;ko00240//Pyrimidine metabolism;ko01100//Metabolic pathways;ko03020//RNA polymerase	-	GO:0043531//ADP binding	-	gi|108707907|gb|ABF95702.1|/0/NB-ARC domain containing protein, expressed [Oryza sativa Japonica Group]
LOC_Os04g43440	2727	85	41	93	307	119	158	3.7543	1.59992	up	5.6e-05	0.00166883	ko04626//Plant-pathogen interaction	-	GO:0043531//ADP binding;GO:0005524//ATP binding	-	gi|38344648|emb|CAE02341.2|;gi|218195212|gb|EEC77639.1|/1.82401e-34;0/OSJNBb0072M01.2 [Oryza sativa Japonica Group];hypothetical protein OsI_16631 [Oryza sativa Indica Group]
LOC_Os01g04280	1317	23	27	20	104	20	63	2.16097	1.58244	up	0.00275745	0.0358974	ko04916//Melanogenesis;ko04020//Calcium signaling pathway;ko04270//Vascular smooth muscle contraction;ko05133//Pertussis;ko04744//Phototransduction;ko04626//Plant-pathogen interaction;ko04910//Insulin signaling pathway;ko04970//Salivary secretion;ko04912//GnRH signaling pathway;ko04722//Neurotrophin signaling pathway;ko05034//Alcoholism;ko05031//Amphetamine addiction;ko04745//Phototransduction - …	-	GO:0005516//calmodulin binding	GO:0006950//response to stress	gi|15528601|dbj|BAB64623.1|/0/calmodulin-binding protein -like [Oryza sativa Japonica Group]
LOC_Os07g03820	2097	15	15	8	16	44	43	1.32055	1.56255	up	0.00251945	0.0336675	ko00903//Limonene and pinene degradation;ko05142//Chagas disease (American trypanosomiasis);ko05133//Pertussis;ko05145//Toxoplasmosis;ko04626//Plant-pathogen interaction;ko00642//Ethylbenzene degradation;ko00362//Benzoate degradation;ko04722//Neurotrophin signaling pathway;ko05162//Measles;ko00240//Pyrimidine metabolism;ko00051//Fructose and mannose metabolism;ko04620//Toll-like receptor signalin…	GO:0016021//integral component of membrane;GO:0016023//cytoplasmic, membrane-bounded vesicle	GO:0030246//carbohydrate binding;GO:0005524//ATP binding;GO:0004674//protein serine/threonine kinase activity	GO:0006468//protein phosphorylation	gi|28564579|dbj|BAC57688.1|/0/putative receptor-like protein kinase [Oryza sativa Japonica Group]
LOC_Os11g10770	1224	71	36	105	280	83	161	3.6304	1.50038	up	0.000688202	0.0127507	ko00230//Purine metabolism;ko04623//Cytosolic DNA-sensing pathway;ko04626//Plant-pathogen interaction;ko05016//Huntington's disease;ko05169//Epstein-Barr virus infection;ko00240//Pyrimidine metabolism;ko01100//Metabolic pathways;ko03020//RNA polymerase	GO:0016023//cytoplasmic, membrane-bounded vesicle	GO:0043531//ADP binding	-	gi|77549339|gb|ABA92136.1|/0/NB-ARC domain containing protein, expressed [Oryza sativa Japonica Group]
LOC_Os04g03210	2934	6	9	12	18	28	23	0.812815	1.48621	up	0.00413356	0.048629	ko04626//Plant-pathogen interaction	-	GO:0016301//kinase activity	-	gi|1002260376|ref|XP_015634513.1|/0/PREDICTED: putative receptor-like protein kinase At3g47110 [Oryza sativa Japonica Group]
LOC_Os07g35290	2040	12	9	22	35	36	36	1.40144	1.47007	up	0.000859153	0.0152972	ko05142//Chagas disease (American trypanosomiasis);ko05133//Pertussis;ko05145//Toxoplasmosis;ko04626//Plant-pathogen interaction;ko04722//Neurotrophin signaling pathway;ko05162//Measles;ko04620//Toll-like receptor signaling pathway;ko05164//Influenza A;ko05140//Leishmaniasis;ko05152//Tuberculosis;ko04064//NF-kappa B signaling pathway;ko04210//Apoptosis	GO:0009506//plasmodesma;GO:0005886//plasma membrane;GO:0016021//integral component of membrane	GO:0005524//ATP binding;GO:0004674//protein serine/threonine kinase activity	GO:0006952//defense response;GO:0006468//protein phosphorylation	gi|1002285061|ref|XP_015646829.1|/0/PREDICTED: putative receptor-like protein kinase At4g00960 [Oryza sativa Japonica Group]
LOC_Os10g04290	6456	14.36	33.03	12	64	51.05	36	1.87268	1.46682	up	0.00160414	0.0244912	ko04626//Plant-pathogen interaction	GO:0005739//mitochondrion	GO:0043531//ADP binding	-	gi|22953962|gb|AAN11195.1|/0/Putative retrotransposable elements TNP2 [Oryza sativa Japonica Group]
LOC_Os06g44010	1191	29	31	26	46	71	96	2.3529	1.45223	up	0.000130718	0.00335113	ko04626//Plant-pathogen interaction	GO:0005634//nucleus	GO:0003700//transcription factor activity, sequence-specific DNA binding	GO:0006952//defense response;GO:0009685//gibberellin metabolic process	gi|1002274529|ref|XP_015641578.1|/0/PREDICTED: probable WRKY transcription factor 60 [Oryza sativa Japonica Group]
LOC_Os01g49920	2094	17	11	45	59	41	74	2.0854	1.43553	up	0.00270392	0.0354897	ko04626//Plant-pathogen interaction	GO:0016021//integral component of membrane	GO:0005524//ATP binding;GO:0004674//protein serine/threonine kinase activity	GO:0006468//protein phosphorylation	gi|215704149|dbj|BAG92989.1|/0/unnamed protein product [Oryza sativa Japonica Group]
LOC_Os07g35580	2091	87	131	118	252	300	240	4.22833	1.37496	up	3.17e-07	2.17e-05	ko05142//Chagas disease (American trypanosomiasis);ko05133//Pertussis;ko05145//Toxoplasmosis;ko04626//Plant-pathogen interaction;ko04722//Neurotrophin signaling pathway;ko05162//Measles;ko04620//Toll-like receptor signaling pathway;ko05164//Influenza A;ko05140//Leishmaniasis;ko05152//Tuberculosis;ko04064//NF-kappa B signaling pathway;ko04210//Apoptosis	GO:0016021//integral component of membrane;GO:0009506//plasmodesma;GO:0016023//cytoplasmic, membrane-bounded vesicle;GO:0005886//plasma membrane	GO:0004674//protein serine/threonine kinase activity;GO:0005524//ATP binding	GO:0006952//defense response;GO:0006468//protein phosphorylation	gi|113611425|dbj|BAF21803.1|/0/Os07g0540100 [Oryza sativa Japonica Group]
LOC_Os05g45210	2856	18	24	28	65	57	42	2.00947	1.37314	up	0.000276643	0.00618287	ko04626//Plant-pathogen interaction	GO:0016021//integral component of membrane	GO:0050664//oxidoreductase activity, acting on NAD(P)H, oxygen as acceptor;GO:0004601//peroxidase activity;GO:0005509//calcium ion binding	GO:0098869//cellular oxidant detoxification;GO:0055114//oxidation-reduction process	gi|113579666|dbj|BAF18029.1|/0/Os05g0528000 [Oryza sativa Japonica Group]
LOC_Os03g04110	1071	55	63	52	151	123	120	3.24584	1.35947	up	3.49e-06	0.000164922	ko04626//Plant-pathogen interaction	GO:0016021//integral component of membrane;GO:0016023//cytoplasmic, membrane-bounded vesicle;GO:0005886//plasma membrane	GO:0008061//chitin binding;GO:0043621//protein self-association	GO:0006952//defense response	gi|75244901|sp|Q8H8C7.1|CEBIP_ORYSJ/0/RecName: Full=Chitin elicitor-binding protein; Short=CEBiP; Flags: Precursor
LOC_Os05g09020	585	16	24	21	38	42	59	1.79792	1.33196	up	0.000906997	0.0159419	ko04626//Plant-pathogen interaction	-	GO:0043565//sequence-specific DNA binding;GO:0003700//transcription factor activity, sequence-specific DNA binding	GO:0006355//regulation of transcription, DNA-templated	gi|323388965|gb|ADX60287.1|;gi|222630436|gb|EEE62568.1|/3.9511e-59;2.59588e-94/WRKY transcription factor, partial [Oryza sativa Japonica Group];hypothetical protein OsJ_17367 [Oryza sativa Japonica Group]
LOC_Os11g30210	2820	17	13	23	53	37	29	1.58664	1.32295	up	0.00234194	0.032087	ko00230//Purine metabolism;ko04623//Cytosolic DNA-sensing pathway;ko04626//Plant-pathogen interaction;ko05016//Huntington's disease;ko05169//Epstein-Barr virus infection;ko00240//Pyrimidine metabolism;ko01100//Metabolic pathways;ko03020//RNA polymerase	-	GO:0043531//ADP binding	-	gi|77550959|gb|ABA93756.1|/0/NB-ARC domain containing protein [Oryza sativa Japonica Group]
LOC_Os07g40630	3321	108	82	184	275	207	342	4.3159	1.31751	up	4.33e-05	0.0013557	ko04626//Plant-pathogen interaction;ko04075//Plant hormone signal transduction	GO:0016021//integral component of membrane;GO:0016023//cytoplasmic, membrane-bounded vesicle	GO:0005524//ATP binding;GO:0004674//protein serine/threonine kinase activity	GO:0006468//protein phosphorylation	gi|113611712|dbj|BAF22090.1|/0/Os07g0597200 [Oryza sativa Japonica Group]
LOC_Os09g34150	2043	31	32	29	80	70	56	2.3448	1.30801	up	9.86e-05	0.00264697	ko04626//Plant-pathogen interaction	-	GO:0043531//ADP binding	-	gi|937934060|dbj|BAT08975.1|;gi|1002297616|ref|XP_015612238.1|/0;0/Os09g0517100 [Oryza sativa Japonica Group];PREDICTED: disease resistance protein RPM1 isoform X3 [Oryza sativa Japonica Group]
LOC_Os01g41870	2250	23	44	26	60	92	57	2.36064	1.28887	up	0.000721119	0.0132955	ko05142//Chagas disease (American trypanosomiasis);ko05133//Pertussis;ko05145//Toxoplasmosis;ko04626//Plant-pathogen interaction;ko04722//Neurotrophin signaling pathway;ko05162//Measles;ko04620//Toll-like receptor signaling pathway;ko05164//Influenza A;ko05140//Leishmaniasis;ko05152//Tuberculosis;ko04064//NF-kappa B signaling pathway;ko04210//Apoptosis	-	GO:0004672//protein kinase activity;GO:0005524//ATP binding	GO:0006468//protein phosphorylation	gi|1002230388|ref|XP_015648735.1|/0/PREDICTED: inactive protein kinase SELMODRAFT_444075 isoform X1 [Oryza sativa Japonica Group]
LOC_Os07g35680	2097	31	45	58	74	148	68	2.8239	1.24349	up	0.000875944	0.0154812	ko05142//Chagas disease (American trypanosomiasis);ko05133//Pertussis;ko05145//Toxoplasmosis;ko04626//Plant-pathogen interaction;ko04722//Neurotrophin signaling pathway;ko05162//Measles;ko04620//Toll-like receptor signaling pathway;ko05164//Influenza A;ko05140//Leishmaniasis;ko05152//Tuberculosis;ko04064//NF-kappa B signaling pathway;ko04210//Apoptosis	GO:0009506//plasmodesma;GO:0005886//plasma membrane;GO:0016021//integral component of membrane;GO:0005739//mitochondrion	GO:0005524//ATP binding;GO:0004674//protein serine/threonine kinase activity	GO:0006952//defense response;GO:0006468//protein phosphorylation	gi|1002281030|ref|XP_015644813.1|/0/PREDICTED: cysteine-rich receptor-like protein kinase 10 [Oryza sativa Japonica Group]
LOC_Os07g18230	2010	15	42	33	68	84	42	2.27406	1.23051	up	0.00363039	0.0443699	ko05142//Chagas disease (American trypanosomiasis);ko05133//Pertussis;ko05145//Toxoplasmosis;ko04626//Plant-pathogen interaction;ko04075//Plant hormone signal transduction;ko04722//Neurotrophin signaling pathway;ko05162//Measles;ko04620//Toll-like receptor signaling pathway;ko05164//Influenza A;ko05140//Leishmaniasis;ko05152//Tuberculosis;ko04064//NF-kappa B signaling pathway;ko04210//Apoptosis	GO:0016021//integral component of membrane;GO:0016023//cytoplasmic, membrane-bounded vesicle	GO:0030246//carbohydrate binding;GO:0005524//ATP binding;GO:0004674//protein serine/threonine kinase activity	GO:0006468//protein phosphorylation	gi|255677672|dbj|BAH93869.1|/0/Os07g0283050 [Oryza sativa Japonica Group]
LOC_Os07g03000	3054	55	62	74	133	150	121	3.3123	1.22768	up	9.64e-06	0.000395689	ko04626//Plant-pathogen interaction	GO:0016021//integral component of membrane;GO:0016023//cytoplasmic, membrane-bounded vesicle;GO:0005739//mitochondrion	GO:0005524//ATP binding;GO:0004674//protein serine/threonine kinase activity	GO:0006468//protein phosphorylation	gi|937924937|dbj|BAS99853.1|/0/Os07g0121200 [Oryza sativa Japonica Group]
LOC_Os01g66680	2247	27	18	18	51	56	25	1.75081	1.20702	up	0.00429591	0.0499263	ko05142//Chagas disease (American trypanosomiasis);ko05133//Pertussis;ko05145//Toxoplasmosis;ko04626//Plant-pathogen interaction;ko04075//Plant hormone signal transduction;ko04722//Neurotrophin signaling pathway;ko05162//Measles;ko04620//Toll-like receptor signaling pathway;ko05164//Influenza A;ko05140//Leishmaniasis;ko05152//Tuberculosis;ko04064//NF-kappa B signaling pathway;ko04210//Apoptosis	GO:0016021//integral component of membrane;GO:0016023//cytoplasmic, membrane-bounded vesicle;GO:0009536//plastid;GO:0005886//plasma membrane	GO:0004674//protein serine/threonine kinase activity;GO:0005524//ATP binding	GO:0006468//protein phosphorylation;GO:0048544//recognition of pollen	gi|222619655|gb|EEE55787.1|/0/hypothetical protein OsJ_04364 [Oryza sativa Japonica Group]
LOC_Os01g59530	564	78	110	42	131	186	170	3.58365	1.2049	up	0.000607868	0.0115296	ko04916//Melanogenesis;ko04020//Calcium signaling pathway;ko04270//Vascular smooth muscle contraction;ko05133//Pertussis;ko04744//Phototransduction;ko04626//Plant-pathogen interaction;ko04910//Insulin signaling pathway;ko04970//Salivary secretion;ko04912//GnRH signaling pathway;ko04722//Neurotrophin signaling pathway;ko05034//Alcoholism;ko05031//Amphetamine addiction;ko04745//Phototransduction - …	GO:0005829//cytosol;GO:0005774//vacuolar membrane;GO:0005634//nucleus;GO:0005886//plasma membrane	GO:0005509//calcium ion binding;GO:0004689//phosphorylase kinase activity;GO:0005515//protein binding	GO:0006468//protein phosphorylation;GO:0009846//pollen germination;GO:0030163//protein catabolic process;GO:0019722//calcium-mediated signaling	gi|75330836|sp|Q8S1Y9.1|CML1_ORYSJ/7.23882e-104/RecName: Full=Calmodulin-like protein 1; AltName: Full=OsCAM61; Flags: Precursor
LOC_Os01g25820	2718	269	351	233	626	677	485	5.44647	1.20023	up	1.05e-05	0.000425388	ko04626//Plant-pathogen interaction	GO:0016021//integral component of membrane	GO:0016174//NAD(P)H oxidase activity;GO:0043621//protein self-association;GO:0005509//calcium ion binding;GO:0004601//peroxidase activity	GO:0098869//cellular oxidant detoxification;GO:0009408//response to heat;GO:0009845//seed germination;GO:0055114//oxidation-reduction process	gi|75112755|sp|Q5ZAJ0.1|RBOHB_ORYSJ/0/RecName: Full=Respiratory burst oxidase homolog protein B; AltName: Full=NADPH oxidase RBOHB; Short=OsrbohB
LOC_Os06g49380	4485	22	21	44	59	67	53	2.17782	1.19566	up	0.00117301	0.0193911	ko00230//Purine metabolism;ko04623//Cytosolic DNA-sensing pathway;ko04626//Plant-pathogen interaction;ko05016//Huntington's disease;ko05169//Epstein-Barr virus infection;ko00240//Pyrimidine metabolism;ko01100//Metabolic pathways;ko03020//RNA polymerase	-	GO:0043531//ADP binding	-	gi|1002279662|ref|XP_015644152.1|/0/PREDICTED: putative disease resistance protein RGA1 [Oryza sativa Japonica Group]
LOC_Os02g07960	2388	43	29	63	79	86	108	2.77798	1.1816	up	0.000478791	0.0094555	ko04626//Plant-pathogen interaction	GO:0016021//integral component of membrane;GO:0005739//mitochondrion	GO:0004672//protein kinase activity;GO:0005524//ATP binding	GO:0006468//protein phosphorylation	gi|1002244652|ref|XP_015626512.1|;gi|113535592|dbj|BAF07975.1|/0;0/PREDICTED: protein STRUBBELIG-RECEPTOR FAMILY 3 isoform X3 [Oryza sativa Japonica Group];Os02g0176100 [Oryza sativa Japonica Group]
LOC_Os03g53020	900	64	71	90	108	100	225	3.46287	1.10958	up	0.00191752	0.0278485	ko04626//Plant-pathogen interaction;ko04075//Plant hormone signal transduction	GO:0005634//nucleus	GO:0046983//protein dimerization activity	GO:0006351//transcription, DNA-templated	gi|75295028|sp|Q75KV9.1|BH148_ORYSJ/2.59534e-151/RecName: Full=Transcription factor BHLH148; AltName: Full=Basic helix-loop-helix protein 148; Short=OsbHLH148; AltName: Full=bHLH transcription factor bHLH148
LOC_Os03g13820	1959	50	43	113	118	127	150	3.32171	1.10938	up	0.00148232	0.0232992	ko00903//Limonene and pinene degradation;ko05142//Chagas disease (American trypanosomiasis);ko05133//Pertussis;ko05145//Toxoplasmosis;ko04626//Plant-pathogen interaction;ko00642//Ethylbenzene degradation;ko00362//Benzoate degradation;ko04722//Neurotrophin signaling pathway;ko05162//Measles;ko00240//Pyrimidine metabolism;ko00051//Fructose and mannose metabolism;ko04620//Toll-like receptor signalin…	-	GO:0005524//ATP binding;GO:0004674//protein serine/threonine kinase activity	GO:0006950//response to stress;GO:0006468//protein phosphorylation	gi|937908280|dbj|BAS83200.1|/0/Os03g0241600 [Oryza sativa Japonica Group]
LOC_Os05g12680	2028	75	60	64	128	113	135	3.26559	1.07398	up	0.000126716	0.003266	ko05142//Chagas disease (American trypanosomiasis);ko05133//Pertussis;ko05145//Toxoplasmosis;ko04626//Plant-pathogen interaction;ko04722//Neurotrophin signaling pathway;ko05162//Measles;ko04620//Toll-like receptor signaling pathway;ko05164//Influenza A;ko05140//Leishmaniasis;ko05152//Tuberculosis;ko04064//NF-kappa B signaling pathway;ko04210//Apoptosis	GO:0016021//integral component of membrane	GO:0005524//ATP binding;GO:0004674//protein serine/threonine kinase activity	GO:0006468//protein phosphorylation	gi|937917931|dbj|BAS92849.1|/0/Os05g0218400 [Oryza sativa Japonica Group]
LOC_Os04g52840	1119	115	99	141	212	161	285	4.07368	1.05873	up	0.000330691	0.00708529	ko05142//Chagas disease (American trypanosomiasis);ko05133//Pertussis;ko05145//Toxoplasmosis;ko04626//Plant-pathogen interaction;ko04722//Neurotrophin signaling pathway;ko05162//Measles;ko04620//Toll-like receptor signaling pathway;ko05164//Influenza A;ko05140//Leishmaniasis;ko05152//Tuberculosis;ko04064//NF-kappa B signaling pathway;ko04210//Apoptosis	GO:0005886//plasma membrane;GO:0016021//integral component of membrane;GO:0016023//cytoplasmic, membrane-bounded vesicle	GO:0005524//ATP binding;GO:0004674//protein serine/threonine kinase activity	GO:0006468//protein phosphorylation	gi|38344329|emb|CAD41745.2|/0/OSJNBa0058K23.11 [Oryza sativa Japonica Group]
LOC_Os01g42330	3783	26	27	42	61	62	53	2.20417	1.04192	up	0.00231116	0.0318446	ko00230//Purine metabolism;ko04623//Cytosolic DNA-sensing pathway;ko04626//Plant-pathogen interaction;ko05016//Huntington's disease;ko05169//Epstein-Barr virus infection;ko00240//Pyrimidine metabolism;ko01100//Metabolic pathways;ko03020//RNA polymerase	-	-	-	gi|1002225948|ref|XP_015624498.1|/0/PREDICTED: disease resistance protein RGA2-like isoform X1 [Oryza sativa Japonica Group]
LOC_Os03g28940	687	138	221	125	270	257	362	4.51368	1.01485	up	0.00102712	0.0174302	ko04626//Plant-pathogen interaction;ko04075//Plant hormone signal transduction	GO:0005634//nucleus	GO:0003714//transcription corepressor activity	GO:1903507//negative regulation of nucleic acid-templated transcription;GO:2000022//regulation of jasmonic acid mediated signaling pathway;GO:0009611//response to wounding;GO:0006355//regulation of transcription, DNA-templated;GO:0031347//regulation of defense response	gi|75147844|sp|Q84R94.1|TI10A_ORYSJ;gi|108708686|gb|ABF96481.1|/2.87269e-148;2.57357e-123/RecName: Full=Protein TIFY 10a; Short=OsTIFY10a; AltName: Full=Jasmonate ZIM domain-containing protein 6; Short=OsJAZ6; AltName: Full=OsJAZ5;ZIM motif family protein, expressed [Oryza sativa Japonica Group]
LOC_Os06g38340	3420	291	212	360	159	123	97	4.30337	-1.02168	down	0.000307042	0.00673401	ko04626//Plant-pathogen interaction	GO:0016021//integral component of membrane;GO:0016023//cytoplasmic, membrane-bounded vesicle	GO:0005524//ATP binding;GO:0004674//protein serine/threonine kinase activity	GO:0006468//protein phosphorylation	gi|113595979|dbj|BAF19853.1|/0/Os06g0581500 [Oryza sativa Japonica Group]
LOC_Os12g41710	1137	174	131	177	42	56	113	3.47922	-1.02389	down	0.00391099	0.04664	ko05142//Chagas disease (American trypanosomiasis);ko05133//Pertussis;ko05145//Toxoplasmosis;ko04626//Plant-pathogen interaction;ko04075//Plant hormone signal transduction;ko04722//Neurotrophin signaling pathway;ko05162//Measles;ko04620//Toll-like receptor signaling pathway;ko04976//Bile secretion;ko05164//Influenza A;ko05140//Leishmaniasis;ko05152//Tuberculosis;ko04064//NF-kappa B signaling path…	GO:0005886//plasma membrane	GO:0005524//ATP binding;GO:0004674//protein serine/threonine kinase activity	GO:0006468//protein phosphorylation	gi|108862948|gb|ABG22081.1|;gi|1002314740|ref|XP_015620740.1|/2.50395e-129;0/receptor-like serine/threonine kinase, putative, expressed [Oryza sativa Japonica Group];PREDICTED: putative serine/threonine-protein kinase [Oryza sativa Japonica Group]
LOC_Os06g47640	513	231	309	153	78	136	96	4.01573	-1.03929	down	0.00150694	0.0235319	ko04626//Plant-pathogen interaction	-	GO:0005509//calcium ion binding	-	gi|75321944|sp|Q5Z676.1|CML29_ORYSJ/1.27074e-77/RecName: Full=Probable calcium-binding protein CML29; AltName: Full=Calmodulin-like protein 29
LOC_Os03g12390	1020	315	219	344	87	158	132	4.31462	-1.06569	down	0.000134622	0.00341469	ko04626//Plant-pathogen interaction	GO:0005739//mitochondrion	GO:0005524//ATP binding;GO:0004702//receptor signaling protein serine/threonine kinase activity	GO:0023014//signal transduction by protein phosphorylation	gi|108706937|gb|ABF94732.1|/0/Protein kinase domain containing protein, expressed [Oryza sativa Japonica Group]
LOC_Os11g07230	3039	761	766	565	314	368	225	5.57597	-1.07021	down	7.32e-05	0.00208622	ko04626//Plant-pathogen interaction	GO:0016021//integral component of membrane;GO:0016023//cytoplasmic, membrane-bounded vesicle	GO:0005524//ATP binding;GO:0004674//protein serine/threonine kinase activity	GO:0006468//protein phosphorylation	gi|222615599|gb|EEE51731.1|/0/hypothetical protein OsJ_33139 [Oryza sativa Japonica Group]
LOC_Os11g45060	3312	1574.96	2092.45	2108.11	380.04	996.7	1098.05	7.02972	-1.08426	down	0.00157132	0.0241633	ko00230//Purine metabolism;ko04623//Cytosolic DNA-sensing pathway;ko04626//Plant-pathogen interaction;ko05016//Huntington's disease;ko05169//Epstein-Barr virus infection;ko00240//Pyrimidine metabolism;ko01100//Metabolic pathways;ko03020//RNA polymerase	-	GO:0043531//ADP binding	-	gi|77552528|gb|ABA95325.1|/0/NB-ARC domain containing protein [Oryza sativa Japonica Group]
LOC_Os11g07250	2994	57	56	64	18	32	25	2.06352	-1.09001	down	0.00231163	0.0318446	ko04626//Plant-pathogen interaction	GO:0016023//cytoplasmic, membrane-bounded vesicle	GO:0016301//kinase activity	-	gi|77548859|gb|ABA91656.1|/0/Leucine Rich Repeat family protein, expressed [Oryza sativa Japonica Group]
LOC_Os11g41170	1662	457	368	892	234	268	209	5.25391	-1.10535	down	0.00033067	0.00708529	ko04626//Plant-pathogen interaction	-	-	-	gi|1002307187|ref|XP_015616982.1|/0/PREDICTED: putative disease resistance RPP13-like protein 3 [Oryza sativa Japonica Group]
LOC_Os07g03890	3825	359	391	491	125	296	101	4.79998	-1.12293	down	0.00101224	0.017254	ko05142//Chagas disease (American trypanosomiasis);ko05133//Pertussis;ko05145//Toxoplasmosis;ko04626//Plant-pathogen interaction;ko04075//Plant hormone signal transduction;ko04722//Neurotrophin signaling pathway;ko05162//Measles;ko04620//Toll-like receptor signaling pathway;ko05164//Influenza A;ko05140//Leishmaniasis;ko05152//Tuberculosis;ko04064//NF-kappa B signaling pathway;ko04210//Apoptosis	GO:0016021//integral component of membrane;GO:0016023//cytoplasmic, membrane-bounded vesicle	GO:0030246//carbohydrate binding;GO:0005524//ATP binding;GO:0004674//protein serine/threonine kinase activity	GO:0006468//protein phosphorylation	gi|113610365|dbj|BAF20743.1|/0/Os07g0131000 [Oryza sativa Japonica Group]
LOC_Os01g02560	1866	307	273	245	62	155	117	4.20681	-1.16883	down	0.000152639	0.0038013	ko05142//Chagas disease (American trypanosomiasis);ko05133//Pertussis;ko05145//Toxoplasmosis;ko04626//Plant-pathogen interaction;ko04075//Plant hormone signal transduction;ko04722//Neurotrophin signaling pathway;ko05162//Measles;ko04620//Toll-like receptor signaling pathway;ko05164//Influenza A;ko05140//Leishmaniasis;ko05152//Tuberculosis;ko04064//NF-kappa B signaling pathway;ko04210//Apoptosis	GO:0016021//integral component of membrane;GO:0016023//cytoplasmic, membrane-bounded vesicle	GO:0030247//polysaccharide binding;GO:0004713//protein tyrosine kinase activity;GO:0005524//ATP binding;GO:0004674//protein serine/threonine kinase activity	GO:0006468//protein phosphorylation	gi|113531367|dbj|BAF03750.1|/0/Os01g0115600 [Oryza sativa Japonica Group]
LOC_Os11g29520	4359	49	61	105	32	27	26	2.30088	-1.17466	down	0.00206939	0.0291784	ko00230//Purine metabolism;ko04623//Cytosolic DNA-sensing pathway;ko04626//Plant-pathogen interaction;ko05016//Huntington's disease;ko05169//Epstein-Barr virus infection;ko00240//Pyrimidine metabolism;ko01100//Metabolic pathways;ko03020//RNA polymerase	-	-	-	gi|77550984|gb|ABA93781.1|/0/NB-ARC domain containing protein, expressed [Oryza sativa Japonica Group]
LOC_Os05g41290	3375	61	63	63	33	24	17	2.11494	-1.18328	down	0.0012259	0.0200407	ko00230//Purine metabolism;ko04623//Cytosolic DNA-sensing pathway;ko04626//Plant-pathogen interaction;ko05016//Huntington's disease;ko05169//Epstein-Barr virus infection;ko00240//Pyrimidine metabolism;ko01100//Metabolic pathways;ko03020//RNA polymerase	-	GO:0043531//ADP binding	-	gi|937919753|dbj|BAS94671.1|/0/Os05g0492200 [Oryza sativa Japonica Group]
LOC_Os11g45750	3603	1104	1085	1413.28	480	621	333.16	6.30937	-1.18473	down	9.99e-06	0.000406796	ko04626//Plant-pathogen interaction	-	GO:0043531//ADP binding	-	gi|77552503|gb|ABA95300.1|/0/NB-ARC domain containing protein, expressed [Oryza sativa Japonica Group]
LOC_Os05g17604	3054	142	154	237	28	63	115	3.56519	-1.20781	down	0.00330326	0.0411588	ko00903//Limonene and pinene degradation;ko05142//Chagas disease (American trypanosomiasis);ko05133//Pertussis;ko05145//Toxoplasmosis;ko04626//Plant-pathogen interaction;ko00642//Ethylbenzene degradation;ko00362//Benzoate degradation;ko04075//Plant hormone signal transduction;ko04722//Neurotrophin signaling pathway;ko05162//Measles;ko00240//Pyrimidine metabolism;ko00051//Fructose and mannose meta…	GO:0005886//plasma membrane;GO:0016021//integral component of membrane;GO:0005739//mitochondrion	GO:0005524//ATP binding;GO:0004674//protein serine/threonine kinase activity;GO:0004672//protein kinase activity	GO:0006468//protein phosphorylation	gi|222630898|gb|EEE63030.1|;gi|1002266033|ref|XP_015637345.1|;gi|1002266025|ref|XP_015637341.1|/0;0;0/hypothetical protein OsJ_17838 [Oryza sativa Japonica Group];PREDICTED: probable LRR receptor-like serine/threonine-protein kinase At1g56140 isoform X4 [Oryza sativa Japonica Group];PREDICTED: probable LRR receptor-like serine/threonine-protein kinase At1g56130 isoform X1 [Oryza sativa Japonica G…
LOC_Os11g11770	3066	178	172	165	64	86	50	3.52029	-1.2229	down	1.15e-05	0.000460518	ko04626//Plant-pathogen interaction	-	GO:0043531//ADP binding	-	gi|77549407|gb|ABA92204.1|/0/NB-ARC domain containing protein, expressed [Oryza sativa Japonica Group]
LOC_Os01g25720	1419	442	350	440	129	194	147	4.75054	-1.24119	down	8.02e-07	4.66e-05	ko00230//Purine metabolism;ko04623//Cytosolic DNA-sensing pathway;ko04626//Plant-pathogen interaction;ko05016//Huntington's disease;ko05169//Epstein-Barr virus infection;ko00240//Pyrimidine metabolism;ko01100//Metabolic pathways;ko03020//RNA polymerase	-	GO:0043531//ADP binding	-	gi|53791625|dbj|BAD52972.1|/0/powdery mildew resistance protein PM3b-like protein [Oryza sativa Japonica Group]
LOC_Os11g29990	3033	573	483	545	155	295	160	5.12464	-1.25467	down	5.06e-06	0.000228103	ko00230//Purine metabolism;ko04623//Cytosolic DNA-sensing pathway;ko04626//Plant-pathogen interaction;ko05016//Huntington's disease;ko05169//Epstein-Barr virus infection;ko00240//Pyrimidine metabolism;ko01100//Metabolic pathways;ko03020//RNA polymerase	-	-	-	gi|77550937|gb|ABA93734.1|/0/NB-ARC domain containing protein [Oryza sativa Japonica Group]
LOC_Os12g02450	966	78	53	55	16	31	23	2.08066	-1.2597	down	0.000747248	0.0136991	ko04626//Plant-pathogen interaction	-	GO:0043565//sequence-specific DNA binding;GO:0003700//transcription factor activity, sequence-specific DNA binding	GO:0006355//regulation of transcription, DNA-templated	gi|77552845|gb|ABA95641.1|/0/WRKY DNA binding domain containing protein [Oryza sativa Japonica Group]
LOC_Os07g35004	2025	173	192	231	47	106	68	3.70432	-1.2924	down	2.68e-05	0.000919311	ko05142//Chagas disease (American trypanosomiasis);ko05133//Pertussis;ko05145//Toxoplasmosis;ko04626//Plant-pathogen interaction;ko04075//Plant hormone signal transduction;ko04722//Neurotrophin signaling pathway;ko05162//Measles;ko04620//Toll-like receptor signaling pathway;ko05164//Influenza A;ko05140//Leishmaniasis;ko05152//Tuberculosis;ko04064//NF-kappa B signaling pathway;ko04210//Apoptosis	GO:0009506//plasmodesma;GO:0005886//plasma membrane;GO:0016021//integral component of membrane	GO:0005524//ATP binding;GO:0004674//protein serine/threonine kinase activity	GO:0006952//defense response;GO:0006468//protein phosphorylation	gi|113611401|dbj|BAF21779.1|/0/Os07g0534700 [Oryza sativa Japonica Group]
LOC_Os06g15750	3276	344	271	414	127	114	127	4.46713	-1.31903	down	3.16e-07	2.17e-05	ko00230//Purine metabolism;ko04623//Cytosolic DNA-sensing pathway;ko04626//Plant-pathogen interaction;ko05016//Huntington's disease;ko05169//Epstein-Barr virus infection;ko00240//Pyrimidine metabolism;ko01100//Metabolic pathways;ko03020//RNA polymerase	-	-	-	gi|937922250|dbj|BAS97167.1|/0/Os06g0268500 [Oryza sativa Japonica Group]
LOC_Os06g07560	711	197	173	139	45	93	44	3.46868	-1.35258	down	2.9e-05	0.000979305	ko04626//Plant-pathogen interaction	-	GO:0046872//metal ion binding	-	gi|75321576|sp|Q5SND2.1|CML30_ORYSJ/7.69413e-80/RecName: Full=Probable calcium-binding protein CML30; AltName: Full=Calmodulin-like protein 30
LOC_Os11g45190	3099	821.04	1045.55	1289.89	166.96	353.3	585.95	6.07267	-1.358	down	0.00032423	0.00700783	ko00230//Purine metabolism;ko04623//Cytosolic DNA-sensing pathway;ko04626//Plant-pathogen interaction;ko05016//Huntington's disease;ko05169//Epstein-Barr virus infection;ko00240//Pyrimidine metabolism;ko01100//Metabolic pathways;ko03020//RNA polymerase	-	GO:0043531//ADP binding	-	gi|77552541|gb|ABA95338.1|/0/NB-ARC domain containing protein [Oryza sativa Japonica Group]
LOC_Os01g72100	558	180	100	199	59	75	26	3.34341	-1.42578	down	0.00010561	0.00279334	ko04626//Plant-pathogen interaction	GO:0005739//mitochondrion	GO:0005509//calcium ion binding	-	gi|75330810|sp|Q8RZB5.1|CML10_ORYSJ/1.40785e-112/RecName: Full=Probable calcium-binding protein CML10; AltName: Full=Calmodulin-like protein 10
LOC_Os08g14950	2916	143	309	147	68	115	22	3.69752	-1.44941	down	0.00233882	0.032087	ko04626//Plant-pathogen interaction	GO:0016021//integral component of membrane;GO:0016023//cytoplasmic, membrane-bounded vesicle	GO:0005524//ATP binding;GO:0004674//protein serine/threonine kinase activity	GO:0006468//protein phosphorylation	gi|40253548|dbj|BAD05495.1|/0/putative protein kinase Xa21, receptor type [Oryza sativa Japonica Group]
LOC_Os01g23970	1272	29	50	62	17	21	5	1.62994	-1.56899	down	0.00175738	0.0262049	ko00903//Limonene and pinene degradation;ko05142//Chagas disease (American trypanosomiasis);ko05133//Pertussis;ko05145//Toxoplasmosis;ko04626//Plant-pathogen interaction;ko00642//Ethylbenzene degradation;ko00362//Benzoate degradation;ko04722//Neurotrophin signaling pathway;ko05162//Measles;ko00240//Pyrimidine metabolism;ko00051//Fructose and mannose metabolism;ko04620//Toll-like receptor signalin…	-	-	-	gi|255673197|dbj|BAH91049.1|/0/Os01g0342200 [Oryza sativa Japonica Group]
LOC_Os04g54010	2157	106	48	205	48	31	26	2.8856	-1.58371	down	0.000494392	0.00971358	ko05142//Chagas disease (American trypanosomiasis);ko05133//Pertussis;ko05145//Toxoplasmosis;ko04626//Plant-pathogen interaction;ko04722//Neurotrophin signaling pathway;ko05162//Measles;ko04620//Toll-like receptor signaling pathway;ko05164//Influenza A;ko05140//Leishmaniasis;ko05152//Tuberculosis;ko04064//NF-kappa B signaling pathway;ko04210//Apoptosis	GO:0016021//integral component of membrane;GO:0009506//plasmodesma;GO:0016023//cytoplasmic, membrane-bounded vesicle;GO:0005886//plasma membrane	GO:0004674//protein serine/threonine kinase activity;GO:0005524//ATP binding	GO:0006952//defense response;GO:0006468//protein phosphorylation;GO:0048544//recognition of pollen	gi|21741057|emb|CAD41681.1|/0/OSJNBb0015D13.19 [Oryza sativa Japonica Group]
LOC_Os01g02550	2202	184	194	190	48	70	53	3.5621	-1.58793	down	5.6e-09	6.43e-07	ko05142//Chagas disease (American trypanosomiasis);ko05133//Pertussis;ko05145//Toxoplasmosis;ko04626//Plant-pathogen interaction;ko04722//Neurotrophin signaling pathway;ko05162//Measles;ko04620//Toll-like receptor signaling pathway;ko05164//Influenza A;ko05140//Leishmaniasis;ko05152//Tuberculosis;ko04064//NF-kappa B signaling pathway;ko04210//Apoptosis	-	GO:0004672//protein kinase activity;GO:0000166//nucleotide binding	GO:0016310//phosphorylation	gi|573911913|ref|XP_006643674.1|/0/PREDICTED: glycerophosphodiester phosphodiesterase protein kinase domain-containing GDPDL2-like [Oryza brachyantha]
LOC_Os08g42700	3681	1464	1137	1512	192	147	676	6.32843	-1.83525	down	7.71e-05	0.00218246	ko04626//Plant-pathogen interaction	-	GO:0043531//ADP binding;GO:0005524//ATP binding	GO:0006915//apoptotic process;GO:0006952//defense response	gi|7415941|dbj|BAA93618.1|/0/PibH8 [Oryza sativa Japonica Group]
LOC_Os02g03960	492	108	125	78	19	33	15	2.61892	-2.08275	down	5.19e-08	4.48e-06	ko05218//Melanoma;ko05160//Hepatitis C;ko05211//Renal cell carcinoma;ko04540//Gap junction;ko04725//Cholinergic synapse;ko04360//Axon guidance;ko04916//Melanogenesis;ko05142//Chagas disease (American trypanosomiasis);ko04270//Vascular smooth muscle contraction;ko05133//Pertussis;ko04062//Chemokine signaling pathway;ko05145//Toxoplasmosis;ko05221//Acute myeloid leukemia;ko04320//Dorso-ventral axis…	GO:0009536//plastid	GO:0043565//sequence-specific DNA binding;GO:0003700//transcription factor activity, sequence-specific DNA binding	GO:0006355//regulation of transcription, DNA-templated	gi|113535329|dbj|BAF07712.1|/4.03262e-62/Os02g0132500 [Oryza sativa Japonica Group]
