# Supplementary material for: Transcriptome Analysis of Rice Reveals the lncRNA–mRNA Regulatory Network in Response to Rice Black-Streaked Dwarf Virus Infection
Source: Viruses. 2020 Aug 27;12(9):951. doi: 10.3390/v12090951 (PMC7552052; doi:10.3390/v12090951)
Supplement: Supplementary file 1 [file viruses-12-00951-s001.zip › Table S6. The 304 mRNAs co-located with DElncRNAs..xlsx]

## Sheet: Sheet1
lncRNA_ID	Gene_ID	lncRNA_exon_pos	Gene_pos
TCONS_00081336	LOC_Os07g16250	9568370-9568839,9568917-9569208,9569309-9569431,9569508-9571681,9571765-9571861,9572917-9574208	9486159-9486740
TCONS_00081336	LOC_Os07g16270	9568370-9568839,9568917-9569208,9569309-9569431,9569508-9571681,9571765-9571861,9572917-9574208	9493577-9493960
TCONS_00081336	LOC_Os07g16280	9568370-9568839,9568917-9569208,9569309-9569431,9569508-9571681,9571765-9571861,9572917-9574208	9498273-9498868
TCONS_00081336	LOC_Os07g16320	9568370-9568839,9568917-9569208,9569309-9569431,9569508-9571681,9571765-9571861,9572917-9574208	9531002-9531908
TCONS_00081336	LOC_Os07g16430	9568370-9568839,9568917-9569208,9569309-9569431,9569508-9571681,9571765-9571861,9572917-9574208	9624333-9627290
TCONS_00081336	LOC_Os07g16450	9568370-9568839,9568917-9569208,9569309-9569431,9569508-9571681,9571765-9571861,9572917-9574208	9633299-9636588
TCONS_00081336	LOC_Os07g16460	9568370-9568839,9568917-9569208,9569309-9569431,9569508-9571681,9571765-9571861,9572917-9574208	9641773-9646091
TCONS_00081336	LOC_Os07g16490	9568370-9568839,9568917-9569208,9569309-9569431,9569508-9571681,9571765-9571861,9572917-9574208	9662994-9665918
TCONS_00009514	LOC_Os01g47180	27062505-27062842,27063889-27064264	26967895-26969185
TCONS_00009514	LOC_Os01g47210	27062505-27062842,27063889-27064264	26988402-26988662
TCONS_00009514	LOC_Os01g47230	27062505-27062842,27063889-27064264	26986856-26988662
TCONS_00009514	LOC_Os01g47250	27062505-27062842,27063889-27064264	26995844-27001999
TCONS_00009514	LOC_Os01g47270	27062505-27062842,27063889-27064264	27014072-27014866
TCONS_00009514	LOC_Os01g47280	27062505-27062842,27063889-27064264	27017925-27021637
TCONS_00009514	LOC_Os01g47300	27062505-27062842,27063889-27064264	27033919-27035765
TCONS_00009514	LOC_Os01g47340	27062505-27062842,27063889-27064264	27047365-27050486
TCONS_00009514	LOC_Os01g47350	27062505-27062842,27063889-27064264	27050849-27054604
TCONS_00009514	LOC_Os01g47360	27062505-27062842,27063889-27064264	27055960-27056849
TCONS_00009514	LOC_Os01g47370	27062505-27062842,27063889-27064264	27063892-27064167
TCONS_00009514	LOC_Os01g47410	27062505-27062842,27063889-27064264	27085745-27092240
TCONS_00009514	LOC_Os01g47430	27062505-27062842,27063889-27064264	27102119-27110016
TCONS_00009514	LOC_Os01g47440	27062505-27062842,27063889-27064264	27112850-27113506
TCONS_00009514	LOC_Os01g47470	27062505-27062842,27063889-27064264	27130541-27134194
TCONS_00009514	LOC_Os01g47510	27062505-27062842,27063889-27064264	27155525-27158677
TCONS_00008316	LOC_Os01g30940	16980230-16981992,16982782-16982905	16884545-16885258
TCONS_00008316	LOC_Os01g30980	16980230-16981992,16982782-16982905	16931805-16937418
TCONS_00008316	LOC_Os01g30990	16980230-16981992,16982782-16982905	16938489-16939796
TCONS_00008316	LOC_Os01g31010	16980230-16981992,16982782-16982905	16957157-16958791
TCONS_00008316	LOC_Os01g31090	16980230-16981992,16982782-16982905	16998813-16999625
TCONS_00008316	LOC_Os01g31120	16980230-16981992,16982782-16982905	17020997-17023636
TCONS_00008316	LOC_Os01g31130	16980230-16981992,16982782-16982905	17026483-17029414
TCONS_00008316	LOC_Os01g31140	16980230-16981992,16982782-16982905	17033728-17034036
TCONS_00008316	LOC_Os01g31160	16980230-16981992,16982782-16982905	17037733-17042277
TCONS_00008316	LOC_Os01g31180	16980230-16981992,16982782-16982905	17045526-17047345
TCONS_00008316	LOC_Os01g31190	16980230-16981992,16982782-16982905	17054515-17058378
TCONS_00008316	LOC_Os01g31200	16980230-16981992,16982782-16982905	17059284-17062049
TCONS_00008316	LOC_Os01g31220	16980230-16981992,16982782-16982905	17066935-17070832
TCONS_00008316	LOC_Os01g31230	16980230-16981992,16982782-16982905	17078006-17081619
TCONS_00070703	LOC_Os06g30840	17984118-17984714,17986629-17987639	17895241-17899064
TCONS_00070703	LOC_Os06g30880	17984118-17984714,17986629-17987639	17937484-17937841
TCONS_00070703	LOC_Os06g30910	17984118-17984714,17986629-17987639	17973891-17978690
TCONS_00070703	LOC_Os06g30920	17984118-17984714,17986629-17987639	17984453-17984846
TCONS_00070703	LOC_Os06g30930	17984118-17984714,17986629-17987639	17992999-17995414
TCONS_00070703	LOC_Os06g30940	17984118-17984714,17986629-17987639	17997701-18000860
TCONS_00070703	LOC_Os06g30960	17984118-17984714,17986629-17987639	18012562-18013693
TCONS_00070703	LOC_Os06g30980	17984118-17984714,17986629-17987639	18023964-18026685
TCONS_00070703	LOC_Os06g31000	17984118-17984714,17986629-17987639	18031974-18041294
TCONS_00005781	LOC_Os01g71490	41495585-41500529,41501241-41501384,41502000-41508349	41403470-41404404
TCONS_00005781	LOC_Os01g71510	41495585-41500529,41501241-41501384,41502000-41508349	41411494-41414721
TCONS_00005781	LOC_Os01g71530	41495585-41500529,41501241-41501384,41502000-41508349	41424958-41431323
TCONS_00005781	LOC_Os01g71540	41495585-41500529,41501241-41501384,41502000-41508349	41439295-41447524
TCONS_00005781	LOC_Os01g71570	41495585-41500529,41501241-41501384,41502000-41508349	41457270-41459896
TCONS_00005781	LOC_Os01g71590	41495585-41500529,41501241-41501384,41502000-41508349	41471918-41478510
TCONS_00005781	LOC_Os01g71624	41495585-41500529,41501241-41501384,41502000-41508349	41495707-41498656
TCONS_00005781	LOC_Os01g71630	41495585-41500529,41501241-41501384,41502000-41508349	41510185-41519730
TCONS_00005781	LOC_Os01g71640	41495585-41500529,41501241-41501384,41502000-41508349	41524511-41525453
TCONS_00005781	LOC_Os01g71650	41495585-41500529,41501241-41501384,41502000-41508349	41525723-41526415
TCONS_00005781	LOC_Os01g71780	41495585-41500529,41501241-41501384,41502000-41508349	41582224-41583944
TCONS_00005781	LOC_Os01g71790	41495585-41500529,41501241-41501384,41502000-41508349	41584367-41585318
TCONS_00005781	LOC_Os01g71800	41495585-41500529,41501241-41501384,41502000-41508349	41585905-41587063
TCONS_00089479	LOC_Os08g28600	17556112-17556165,17558595-17560192	17470308-17478892
TCONS_00089479	LOC_Os08g28620	17556112-17556165,17558595-17560192	17487292-17487519
TCONS_00089479	LOC_Os08g28640	17556112-17556165,17558595-17560192	17497319-17499570
TCONS_00089479	LOC_Os08g28670	17556112-17556165,17558595-17560192	17510084-17511691
TCONS_00089479	LOC_Os08g28680	17556112-17556165,17558595-17560192	17513006-17516101
TCONS_00089479	LOC_Os08g28690	17556112-17556165,17558595-17560192	17518366-17523114
TCONS_00089479	LOC_Os08g28700	17556112-17556165,17558595-17560192	17538199-17540911
TCONS_00089479	LOC_Os08g28710	17556112-17556165,17558595-17560192	17558062-17560192
TCONS_00089479	LOC_Os08g28720	17556112-17556165,17558595-17560192	17565004-17566236
TCONS_00089479	LOC_Os08g28730	17556112-17556165,17558595-17560192	17569906-17576414
TCONS_00089479	LOC_Os08g28740	17556112-17556165,17558595-17560192	17581106-17583130
TCONS_00089479	LOC_Os08g28770	17556112-17556165,17558595-17560192	17597945-17603202
TCONS_00089479	LOC_Os08g28784	17556112-17556165,17558595-17560192	17605941-17606825
TCONS_00089479	LOC_Os08g28810	17556112-17556165,17558595-17560192	17621375-17622750
TCONS_00089479	LOC_Os08g28870	17556112-17556165,17558595-17560192	17650554-17653886
TCONS_00008924	LOC_Os01g39040	22031169-22032455,22033577-22034011	21944097-21945426
TCONS_00008924	LOC_Os01g39050	22031169-22032455,22033577-22034011	21949940-21956491
TCONS_00008924	LOC_Os01g39070	22031169-22032455,22033577-22034011	21965383-21966047
TCONS_00008924	LOC_Os01g39090	22031169-22032455,22033577-22034011	21971220-21971465
TCONS_00008924	LOC_Os01g39120	22031169-22032455,22033577-22034011	22004910-22005367
TCONS_00008924	LOC_Os01g39134	22031169-22032455,22033577-22034011	22025915-22027269
TCONS_00008924	LOC_Os01g39136	22031169-22032455,22033577-22034011	22031208-22034011
TCONS_00008924	LOC_Os01g39210	22031169-22032455,22033577-22034011	22061082-22061411
TCONS_00008924	LOC_Os01g39230	22031169-22032455,22033577-22034011	22067798-22068241
TCONS_00008924	LOC_Os01g39270	22031169-22032455,22033577-22034011	22088204-22091020
TCONS_00008924	LOC_Os01g39280	22031169-22032455,22033577-22034011	22091548-22091889
TCONS_00008924	LOC_Os01g39290	22031169-22032455,22033577-22034011	22098320-22099659
TCONS_00091345	LOC_Os09g07820	4059232-4063568,4063643-4063736,4063847-4063916	3959855-3965192
TCONS_00091345	LOC_Os09g07830	4059232-4063568,4063643-4063736,4063847-4063916	3970052-3975828
TCONS_00091345	LOC_Os09g07840	4059232-4063568,4063643-4063736,4063847-4063916	3978157-3980103
TCONS_00091345	LOC_Os09g07880	4059232-4063568,4063643-4063736,4063847-4063916	4004816-4007901
TCONS_00091345	LOC_Os09g07900	4059232-4063568,4063643-4063736,4063847-4063916	4016486-4036019
TCONS_00091345	LOC_Os09g07920	4059232-4063568,4063643-4063736,4063847-4063916	4042693-4045478
TCONS_00091345	LOC_Os09g07950	4059232-4063568,4063643-4063736,4063847-4063916	4081684-4084576
TCONS_00091345	LOC_Os09g08030	4059232-4063568,4063643-4063736,4063847-4063916	4135752-4136547
TCONS_00091345	LOC_Os09g08060	4059232-4063568,4063643-4063736,4063847-4063916	4161660-4162648
TCONS_00065705	LOC_Os05g15560	8902479-8902875,8949120-8949152	8807027-8811478
TCONS_00065705	LOC_Os05g15570	8902479-8902875,8949120-8949152	8814905-8816965
TCONS_00065705	LOC_Os05g15590	8902479-8902875,8949120-8949152	8836369-8837202
TCONS_00065705	LOC_Os05g15630	8902479-8902875,8949120-8949152	8846586-8848673
TCONS_00065705	LOC_Os05g15650	8902479-8902875,8949120-8949152	8852481-8853587
TCONS_00065705	LOC_Os05g15670	8902479-8902875,8949120-8949152	8864874-8865456
TCONS_00065705	LOC_Os05g15680	8902479-8902875,8949120-8949152	8869099-8870052
TCONS_00065705	LOC_Os05g15690	8902479-8902875,8949120-8949152	8870360-8871945
TCONS_00065705	LOC_Os05g15700	8902479-8902875,8949120-8949152	8874069-8874660
TCONS_00065705	LOC_Os05g15730	8902479-8902875,8949120-8949152	8886883-8889398
TCONS_00065705	LOC_Os05g15770	8902479-8902875,8949120-8949152	8902479-8903793
TCONS_00065705	LOC_Os05g15780	8902479-8902875,8949120-8949152	8906074-8906779
TCONS_00065705	LOC_Os05g15800	8902479-8902875,8949120-8949152	8918736-8920137
TCONS_00065705	LOC_Os05g15820	8902479-8902875,8949120-8949152	8934868-8937728
TCONS_00065705	LOC_Os05g15860	8902479-8902875,8949120-8949152	8951705-8954263
TCONS_00065705	LOC_Os05g15870	8902479-8902875,8949120-8949152	8955294-8958028
TCONS_00065705	LOC_Os05g15890	8902479-8902875,8949120-8949152	8966122-8973309
TCONS_00065705	LOC_Os05g15900	8902479-8902875,8949120-8949152	8973729-8974375
TCONS_00065705	LOC_Os05g15910	8902479-8902875,8949120-8949152	8974953-8977359
TCONS_00065705	LOC_Os05g15940	8902479-8902875,8949120-8949152	8992252-9001414
TCONS_00005792	LOC_Os01g71490	41495707-41502053,41502351-41508349	41403470-41404404
TCONS_00005792	LOC_Os01g71510	41495707-41502053,41502351-41508349	41411494-41414721
TCONS_00005792	LOC_Os01g71530	41495707-41502053,41502351-41508349	41424958-41431323
TCONS_00005792	LOC_Os01g71540	41495707-41502053,41502351-41508349	41439295-41447524
TCONS_00005792	LOC_Os01g71570	41495707-41502053,41502351-41508349	41457270-41459896
TCONS_00005792	LOC_Os01g71590	41495707-41502053,41502351-41508349	41471918-41478510
TCONS_00005792	LOC_Os01g71624	41495707-41502053,41502351-41508349	41495707-41498656
TCONS_00005792	LOC_Os01g71630	41495707-41502053,41502351-41508349	41510185-41519730
TCONS_00005792	LOC_Os01g71640	41495707-41502053,41502351-41508349	41524511-41525453
TCONS_00005792	LOC_Os01g71650	41495707-41502053,41502351-41508349	41525723-41526415
TCONS_00005792	LOC_Os01g71780	41495707-41502053,41502351-41508349	41582224-41583944
TCONS_00005792	LOC_Os01g71790	41495707-41502053,41502351-41508349	41584367-41585318
TCONS_00005792	LOC_Os01g71800	41495707-41502053,41502351-41508349	41585905-41587063
TCONS_00010868	LOC_Os01g62530	36308049-36308470,36310641-36311246	36212290-36213225
TCONS_00010868	LOC_Os01g62550	36308049-36308470,36310641-36311246	36216795-36218318
TCONS_00010868	LOC_Os01g62560	36308049-36308470,36310641-36311246	36219265-36220410
TCONS_00010868	LOC_Os01g62620	36308049-36308470,36310641-36311246	36257435-36261744
TCONS_00010868	LOC_Os01g62630	36308049-36308470,36310641-36311246	36268063-36269737
TCONS_00010868	LOC_Os01g62640	36308049-36308470,36310641-36311246	36274026-36274733
TCONS_00010868	LOC_Os01g62670	36308049-36308470,36310641-36311246	36296114-36298431
TCONS_00010868	LOC_Os01g62680	36308049-36308470,36310641-36311246	36300256-36302127
TCONS_00010868	LOC_Os01g62690	36308049-36308470,36310641-36311246	36307136-36307885
TCONS_00010868	LOC_Os01g62750	36308049-36308470,36310641-36311246	36325683-36336561
TCONS_00010868	LOC_Os01g62800	36308049-36308470,36310641-36311246	36368227-36373959
TCONS_00010868	LOC_Os01g62820	36308049-36308470,36310641-36311246	36385625-36390411
TCONS_00010868	LOC_Os01g62850	36308049-36308470,36310641-36311246	36398958-36401777
TCONS_00056787	LOC_Os04g12400	6938662-6942391,6942487-6943054,6943635-6943932	6844999-6848331
TCONS_00056787	LOC_Os04g12450	6938662-6942391,6942487-6943054,6943635-6943932	6879863-6880159
TCONS_00056787	LOC_Os04g12460	6938662-6942391,6942487-6943054,6943635-6943932	6889026-6894168
TCONS_00056787	LOC_Os04g12480	6938662-6942391,6942487-6943054,6943635-6943932	6902844-6909634
TCONS_00056787	LOC_Os04g12490	6938662-6942391,6942487-6943054,6943635-6943932	6910749-6911487
TCONS_00056787	LOC_Os04g12499	6938662-6942391,6942487-6943054,6943635-6943932	6913245-6916224
TCONS_00056787	LOC_Os04g12530	6938662-6942391,6942487-6943054,6943635-6943932	6924995-6926957
TCONS_00056787	LOC_Os04g12540	6938662-6942391,6942487-6943054,6943635-6943932	6939046-6942716
TCONS_00056787	LOC_Os04g12550	6938662-6942391,6942487-6943054,6943635-6943932	6951341-6951877
TCONS_00056787	LOC_Os04g12560	6938662-6942391,6942487-6943054,6943635-6943932	6955305-6957924
TCONS_00056787	LOC_Os04g12570	6938662-6942391,6942487-6943054,6943635-6943932	6959227-6959619
TCONS_00056787	LOC_Os04g12580	6938662-6942391,6942487-6943054,6943635-6943932	6966603-6969039
TCONS_00056787	LOC_Os04g12589	6938662-6942391,6942487-6943054,6943635-6943932	6972808-6973207
TCONS_00056787	LOC_Os04g12600	6938662-6942391,6942487-6943054,6943635-6943932	6976835-6979249
TCONS_00056787	LOC_Os04g12620	6938662-6942391,6942487-6943054,6943635-6943932	6994347-6995304
TCONS_00056787	LOC_Os04g12639	6938662-6942391,6942487-6943054,6943635-6943932	6996863-7005632
TCONS_00056787	LOC_Os04g12669	6938662-6942391,6942487-6943054,6943635-6943932	7014342-7021168
TCONS_00056787	LOC_Os04g12690	6938662-6942391,6942487-6943054,6943635-6943932	7024800-7028115
TCONS_00056787	LOC_Os04g12710	6938662-6942391,6942487-6943054,6943635-6943932	7028330-7028947
TCONS_00056787	LOC_Os04g12720	6938662-6942391,6942487-6943054,6943635-6943932	7031215-7033483
TCONS_00056787	LOC_Os04g12730	6938662-6942391,6942487-6943054,6943635-6943932	7036102-7040641
TCONS_00059316	LOC_Os04g45740	27164826-27165925,27166037-27166095,27166309-27166512,27171990-27175910,27177026-27177468	27066682-27067915
TCONS_00059316	LOC_Os04g45750	27164826-27165925,27166037-27166095,27166309-27166512,27171990-27175910,27177026-27177468	27077367-27080595
TCONS_00059316	LOC_Os04g45780	27164826-27165925,27166037-27166095,27166309-27166512,27171990-27175910,27177026-27177468	27092824-27096679
TCONS_00059316	LOC_Os04g45790	27164826-27165925,27166037-27166095,27166309-27166512,27171990-27175910,27177026-27177468	27108715-27109053
TCONS_00059316	LOC_Os04g45860	27164826-27165925,27166037-27166095,27166309-27166512,27171990-27175910,27177026-27177468	27154339-27158799
TCONS_00059316	LOC_Os04g45880	27164826-27165925,27166037-27166095,27166309-27166512,27171990-27175910,27177026-27177468	27163640-27163855
TCONS_00059316	LOC_Os04g45890	27164826-27165925,27166037-27166095,27166309-27166512,27171990-27175910,27177026-27177468	27172115-27173657
TCONS_00059316	LOC_Os04g45900	27164826-27165925,27166037-27166095,27166309-27166512,27171990-27175910,27177026-27177468	27183872-27187869
TCONS_00059316	LOC_Os04g45920	27164826-27165925,27166037-27166095,27166309-27166512,27171990-27175910,27177026-27177468	27194339-27197018
TCONS_00059316	LOC_Os04g45950	27164826-27165925,27166037-27166095,27166309-27166512,27171990-27175910,27177026-27177468	27214090-27217940
TCONS_00059316	LOC_Os04g45990	27164826-27165925,27166037-27166095,27166309-27166512,27171990-27175910,27177026-27177468	27244079-27246792
TCONS_00059316	LOC_Os04g46000	27164826-27165925,27166037-27166095,27166309-27166512,27171990-27175910,27177026-27177468	27251810-27254199
TCONS_00059316	LOC_Os04g46010	27164826-27165925,27166037-27166095,27166309-27166512,27171990-27175910,27177026-27177468	27256245-27258942
TCONS_00059316	LOC_Os04g46020	27164826-27165925,27166037-27166095,27166309-27166512,27171990-27175910,27177026-27177468	27260209-27264560
TCONS_00059822	LOC_Os04g51500	30607493-30609094,30609233-30610559	30510514-30513871
TCONS_00059822	LOC_Os04g51520	30607493-30609094,30609233-30610559	30520356-30523556
TCONS_00059822	LOC_Os04g51540	30607493-30609094,30609233-30610559	30530155-30536309
TCONS_00059822	LOC_Os04g51580	30607493-30609094,30609233-30610559	30552922-30556964
TCONS_00059822	LOC_Os04g51610	30607493-30609094,30609233-30610559	30572095-30584308
TCONS_00059822	LOC_Os04g51640	30607493-30609094,30609233-30610559	30605827-30606831
TCONS_00059822	LOC_Os04g51660	30607493-30609094,30609233-30610559	30608765-30610406
TCONS_00059822	LOC_Os04g51680	30607493-30609094,30609233-30610559	30615960-30616175
TCONS_00059822	LOC_Os04g51690	30607493-30609094,30609233-30610559	30621160-30628372
TCONS_00059822	LOC_Os04g51700	30607493-30609094,30609233-30610559	30629646-30638800
TCONS_00059822	LOC_Os04g51710	30607493-30609094,30609233-30610559	30642096-30645845
TCONS_00059822	LOC_Os04g51730	30607493-30609094,30609233-30610559	30653189-30655189
TCONS_00059822	LOC_Os04g51740	30607493-30609094,30609233-30610559	30657379-30663284
TCONS_00059822	LOC_Os04g51750	30607493-30609094,30609233-30610559	30666403-30670368
TCONS_00059822	LOC_Os04g51760	30607493-30609094,30609233-30610559	30671846-30673888
TCONS_00059822	LOC_Os04g51770	30607493-30609094,30609233-30610559	30678806-30681792
TCONS_00059822	LOC_Os04g51786	30607493-30609094,30609233-30610559	30685422-30687861
TCONS_00059822	LOC_Os04g51792	30607493-30609094,30609233-30610559	30688097-30689790
TCONS_00059822	LOC_Os04g51794	30607493-30609094,30609233-30610559	30690623-30696691
TCONS_00059822	LOC_Os04g51796	30607493-30609094,30609233-30610559	30697527-30701645
TCONS_00059318	LOC_Os04g45740	27164826-27175907,27177026-27177469	27066682-27067915
TCONS_00059318	LOC_Os04g45750	27164826-27175907,27177026-27177469	27077367-27080595
TCONS_00059318	LOC_Os04g45780	27164826-27175907,27177026-27177469	27092824-27096679
TCONS_00059318	LOC_Os04g45790	27164826-27175907,27177026-27177469	27108715-27109053
TCONS_00059318	LOC_Os04g45860	27164826-27175907,27177026-27177469	27154339-27158799
TCONS_00059318	LOC_Os04g45880	27164826-27175907,27177026-27177469	27163640-27163855
TCONS_00059318	LOC_Os04g45890	27164826-27175907,27177026-27177469	27172115-27173657
TCONS_00059318	LOC_Os04g45900	27164826-27175907,27177026-27177469	27183872-27187869
TCONS_00059318	LOC_Os04g45920	27164826-27175907,27177026-27177469	27194339-27197018
TCONS_00059318	LOC_Os04g45950	27164826-27175907,27177026-27177469	27214090-27217940
TCONS_00059318	LOC_Os04g45990	27164826-27175907,27177026-27177469	27244079-27246792
TCONS_00059318	LOC_Os04g46000	27164826-27175907,27177026-27177469	27251810-27254199
TCONS_00059318	LOC_Os04g46010	27164826-27175907,27177026-27177469	27256245-27258942
TCONS_00059318	LOC_Os04g46020	27164826-27175907,27177026-27177469	27260209-27264560
TCONS_00059318	LOC_Os04g46030	27164826-27175907,27177026-27177469	27268324-27268980
TCONS_00009978	LOC_Os01g52890	30512276-30512751,30512877-30513308,30513415-30513683	30412827-30413574
TCONS_00009978	LOC_Os01g52900	30512276-30512751,30512877-30513308,30513415-30513683	30413604-30415814
TCONS_00009978	LOC_Os01g52940	30512276-30512751,30512877-30513308,30513415-30513683	30438403-30440847
TCONS_00009978	LOC_Os01g52950	30512276-30512751,30512877-30513308,30513415-30513683	30441633-30444059
TCONS_00009978	LOC_Os01g52970	30512276-30512751,30512877-30513308,30513415-30513683	30447422-30449206
TCONS_00009978	LOC_Os01g52980	30512276-30512751,30512877-30513308,30513415-30513683	30453353-30455368
TCONS_00009978	LOC_Os01g53010	30512276-30512751,30512877-30513308,30513415-30513683	30467820-30468116
TCONS_00009978	LOC_Os01g53030	30512276-30512751,30512877-30513308,30513415-30513683	30475254-30476041
TCONS_00009978	LOC_Os01g53040	30512276-30512751,30512877-30513308,30513415-30513683	30480134-30482161
TCONS_00009978	LOC_Os01g53070	30512276-30512751,30512877-30513308,30513415-30513683	30490746-30496722
TCONS_00009978	LOC_Os01g53079	30512276-30512751,30512877-30513308,30513415-30513683	30501605-30507193
TCONS_00009978	LOC_Os01g53090	30512276-30512751,30512877-30513308,30513415-30513683	30512276-30521565
TCONS_00009978	LOC_Os01g53130	30512276-30512751,30512877-30513308,30513415-30513683	30524993-30529097
TCONS_00009978	LOC_Os01g53170	30512276-30512751,30512877-30513308,30513415-30513683	30551624-30553990
TCONS_00009978	LOC_Os01g53210	30512276-30512751,30512877-30513308,30513415-30513683	30574861-30576287
TCONS_00009978	LOC_Os01g53230	30512276-30512751,30512877-30513308,30513415-30513683	30585100-30585423
TCONS_00009978	LOC_Os01g53250	30512276-30512751,30512877-30513308,30513415-30513683	30593434-30598522
TCONS_00009978	LOC_Os01g53255	30512276-30512751,30512877-30513308,30513415-30513683	30600797-30602032
TCONS_00011723	LOC_Os01g72200	41949333-41951662,41951830-41951887,41952060-41952124	41864619-41866546
TCONS_00011723	LOC_Os01g72205	41949333-41951662,41951830-41951887,41952060-41952124	41867501-41869645
TCONS_00011723	LOC_Os01g72220	41949333-41951662,41951830-41951887,41952060-41952124	41873949-41880601
TCONS_00011723	LOC_Os01g72260	41949333-41951662,41951830-41951887,41952060-41952124	41896504-41898331
TCONS_00011723	LOC_Os01g72270	41949333-41951662,41951830-41951887,41952060-41952124	41900002-41901651
TCONS_00011723	LOC_Os01g72280	41949333-41951662,41951830-41951887,41952060-41952124	41904210-41907453
TCONS_00011723	LOC_Os01g72320	41949333-41951662,41951830-41951887,41952060-41952124	41925595-41931602
TCONS_00011723	LOC_Os01g72370	41949333-41951662,41951830-41951887,41952060-41952124	41971444-41978408
TCONS_00011723	LOC_Os01g72390	41949333-41951662,41951830-41951887,41952060-41952124	41986078-41988856
TCONS_00011723	LOC_Os01g72400	41949333-41951662,41951830-41951887,41952060-41952124	41992477-41996445
TCONS_00011723	LOC_Os01g72420	41949333-41951662,41951830-41951887,41952060-41952124	41999585-42002803
TCONS_00011723	LOC_Os01g72430	41949333-41951662,41951830-41951887,41952060-41952124	42003931-42009785
TCONS_00011723	LOC_Os01g72440	41949333-41951662,41951830-41951887,41952060-41952124	42011186-42011507
TCONS_00011723	LOC_Os01g72470	41949333-41951662,41951830-41951887,41952060-41952124	42020859-42021464
TCONS_00011723	LOC_Os01g72490	41949333-41951662,41951830-41951887,41952060-41952124	42037167-42039107
TCONS_00024711	LOC_Os12g02290	819049-819195,819546-819756,820494-824445	723133-724301
TCONS_00024711	LOC_Os12g02300	819049-819195,819546-819756,820494-824445	727800-728701
TCONS_00024711	LOC_Os12g02310	819049-819195,819546-819756,820494-824445	732978-734220
TCONS_00024711	LOC_Os12g02320	819049-819195,819546-819756,820494-824445	737406-737894
TCONS_00024711	LOC_Os12g02330	819049-819195,819546-819756,820494-824445	746155-747300
TCONS_00024711	LOC_Os12g02340	819049-819195,819546-819756,820494-824445	760919-762440
TCONS_00024711	LOC_Os12g02350	819049-819195,819546-819756,820494-824445	763791-764723
TCONS_00024711	LOC_Os12g02380	819049-819195,819546-819756,820494-824445	776593-779942
TCONS_00024711	LOC_Os12g02410	819049-819195,819546-819756,820494-824445	801669-801902
TCONS_00024711	LOC_Os12g02430	819049-819195,819546-819756,820494-824445	812339-812716
TCONS_00024711	LOC_Os12g02500	819049-819195,819546-819756,820494-824445	854005-855382
TCONS_00024711	LOC_Os12g02510	819049-819195,819546-819756,820494-824445	856185-858043
TCONS_00024711	LOC_Os12g02560	819049-819195,819546-819756,820494-824445	881780-883971
TCONS_00024711	LOC_Os12g02589	819049-819195,819546-819756,820494-824445	894714-898452
TCONS_00024711	LOC_Os12g02620	819049-819195,819546-819756,820494-824445	906322-908669
TCONS_00024711	LOC_Os12g02630	819049-819195,819546-819756,820494-824445	910825-912396
TCONS_00024711	LOC_Os12g02640	819049-819195,819546-819756,820494-824445	912504-916531
TCONS_00030021	LOC_Os12g32430	19637837-19638788,19638882-19640733,19641766-19641987	19557622-19560049
TCONS_00030021	LOC_Os12g32440	19637837-19638788,19638882-19640733,19641766-19641987	19568917-19574933
TCONS_00030021	LOC_Os12g32450	19637837-19638788,19638882-19640733,19641766-19641987	19578843-19585165
TCONS_00030021	LOC_Os12g32580	19637837-19638788,19638882-19640733,19641766-19641987	19656902-19660522
TCONS_00030021	LOC_Os12g32600	19637837-19638788,19638882-19640733,19641766-19641987	19671866-19674318
TCONS_00030021	LOC_Os12g32610	19637837-19638788,19638882-19640733,19641766-19641987	19675353-19676314
TCONS_00030021	LOC_Os12g32630	19637837-19638788,19638882-19640733,19641766-19641987	19684832-19687895
TCONS_00030021	LOC_Os12g32660	19637837-19638788,19638882-19640733,19641766-19641987	19703788-19710164
TCONS_00030021	LOC_Os12g32670	19637837-19638788,19638882-19640733,19641766-19641987	19716108-19719992
TCONS_00030021	LOC_Os12g32680	19637837-19638788,19638882-19640733,19641766-19641987	19730411-19734112
TCONS_00049628	LOC_Os03g40840	22799469-22800028,22800496-22801659,22803529-22803721	22710115-22713187
TCONS_00049628	LOC_Os03g40860	22799469-22800028,22800496-22801659,22803529-22803721	22721921-22722178
TCONS_00049628	LOC_Os03g40880	22799469-22800028,22800496-22801659,22803529-22803721	22730603-22732967
TCONS_00049628	LOC_Os03g40910	22799469-22800028,22800496-22801659,22803529-22803721	22737749-22738570
TCONS_00049628	LOC_Os03g40930	22799469-22800028,22800496-22801659,22803529-22803721	22744328-22746916
TCONS_00049628	LOC_Os03g40970	22799469-22800028,22800496-22801659,22803529-22803721	22768487-22774452
TCONS_00049628	LOC_Os03g41000	22799469-22800028,22800496-22801659,22803529-22803721	22786883-22793943
TCONS_00049628	LOC_Os03g41010	22799469-22800028,22800496-22801659,22803529-22803721	22797204-22797865
TCONS_00049628	LOC_Os03g41050	22799469-22800028,22800496-22801659,22803529-22803721	22815635-22816468
TCONS_00049628	LOC_Os03g41060	22799469-22800028,22800496-22801659,22803529-22803721	22816933-22817775
TCONS_00049628	LOC_Os03g41064	22799469-22800028,22800496-22801659,22803529-22803721	22823772-22824543
TCONS_00049628	LOC_Os03g41070	22799469-22800028,22800496-22801659,22803529-22803721	22825897-22826541
TCONS_00049628	LOC_Os03g41110	22799469-22800028,22800496-22801659,22803529-22803721	22850839-22852132
TCONS_00049628	LOC_Os03g41120	22799469-22800028,22800496-22801659,22803529-22803721	22856683-22861392
TCONS_00049628	LOC_Os03g41130	22799469-22800028,22800496-22801659,22803529-22803721	22863494-22864072
TCONS_00049628	LOC_Os03g41140	22799469-22800028,22800496-22801659,22803529-22803721	22870904-22871934
TCONS_00049628	LOC_Os03g41154	22799469-22800028,22800496-22801659,22803529-22803721	22882427-22882627
TCONS_00049628	LOC_Os03g41170	22799469-22800028,22800496-22801659,22803529-22803721	22892396-22895558
TCONS_00040997	LOC_Os02g58010	35611930-35619569,35619671-35619837,35620185-35622436	35515759-35517058
TCONS_00040997	LOC_Os02g58020	35611930-35619569,35619671-35619837,35620185-35622436	35518909-35523358
TCONS_00040997	LOC_Os02g58030	35611930-35619569,35619671-35619837,35620185-35622436	35526587-35533091
TCONS_00040997	LOC_Os02g58040	35611930-35619569,35619671-35619837,35620185-35622436	35534139-35536130
TCONS_00040997	LOC_Os02g58120	35611930-35619569,35619671-35619837,35620185-35622436	35567720-35570416
TCONS_00040997	LOC_Os02g58139	35611930-35619569,35619671-35619837,35620185-35622436	35572375-35578157
TCONS_00040997	LOC_Os02g58160	35611930-35619569,35619671-35619837,35620185-35622436	35578549-35582213
TCONS_00040997	LOC_Os02g58200	35611930-35619569,35619671-35619837,35620185-35622436	35621744-35622242
TCONS_00040997	LOC_Os02g58214	35611930-35619569,35619671-35619837,35620185-35622436	35633822-35636782
TCONS_00040997	LOC_Os02g58220	35611930-35619569,35619671-35619837,35620185-35622436	35639745-35642575
TCONS_00040997	LOC_Os02g58230	35611930-35619569,35619671-35619837,35620185-35622436	35643004-35648165
TCONS_00040997	LOC_Os02g58240	35611930-35619569,35619671-35619837,35620185-35622436	35649990-35655785
TCONS_00040997	LOC_Os02g58260	35611930-35619569,35619671-35619837,35620185-35622436	35660963-35663483
TCONS_00040997	LOC_Os02g58270	35611930-35619569,35619671-35619837,35620185-35622436	35665166-35667491
TCONS_00040997	LOC_Os02g58280	35611930-35619569,35619671-35619837,35620185-35622436	35668000-35671626
TCONS_00040997	LOC_Os02g58300	35611930-35619569,35619671-35619837,35620185-35622436	35674797-35676431
TCONS_00040997	LOC_Os02g58310	35611930-35619569,35619671-35619837,35620185-35622436	35676788-35678078
TCONS_00040997	LOC_Os02g58340	35611930-35619569,35619671-35619837,35620185-35622436	35682809-35688507
TCONS_00040997	LOC_Os02g58350	35611930-35619569,35619671-35619837,35620185-35622436	35689247-35690390
TCONS_00040997	LOC_Os02g58360	35611930-35619569,35619671-35619837,35620185-35622436	35693609-35699417
TCONS_00040997	LOC_Os02g58370	35611930-35619569,35619671-35619837,35620185-35622436	35700415-35702064
TCONS_00040997	LOC_Os02g58380	35611930-35619569,35619671-35619837,35620185-35622436	35702657-35703491
TCONS_00040997	LOC_Os02g58390	35611930-35619569,35619671-35619837,35620185-35622436	35705635-35710799
TCONS_00040997	LOC_Os02g58400	35611930-35619569,35619671-35619837,35620185-35622436	35712803-35714831
TCONS_00074370	LOC_Os06g28700	16436588-16437825,16438691-16438784,16438977-16444415	16342334-16342612
TCONS_00074370	LOC_Os06g28730	16436588-16437825,16438691-16438784,16438977-16444415	16353727-16354521
TCONS_00074370	LOC_Os06g28740	16436588-16437825,16438691-16438784,16438977-16444415	16363079-16366463
TCONS_00074370	LOC_Os06g28750	16436588-16437825,16438691-16438784,16438977-16444415	16371398-16378339
TCONS_00074370	LOC_Os06g28770	16436588-16437825,16438691-16438784,16438977-16444415	16385565-16387434
TCONS_00074370	LOC_Os06g28780	16436588-16437825,16438691-16438784,16438977-16444415	16390085-16392528
TCONS_00074370	LOC_Os06g28790	16436588-16437825,16438691-16438784,16438977-16444415	16396082-16396891
TCONS_00074370	LOC_Os06g28800	16436588-16437825,16438691-16438784,16438977-16444415	16397164-16398752
TCONS_00074370	LOC_Os06g28820	16436588-16437825,16438691-16438784,16438977-16444415	16400699-16432410
TCONS_00074370	LOC_Os06g28840	16436588-16437825,16438691-16438784,16438977-16444415	16440845-16444414
TCONS_00074370	LOC_Os06g28860	16436588-16437825,16438691-16438784,16438977-16444415	16451826-16453585
TCONS_00074370	LOC_Os06g28880	16436588-16437825,16438691-16438784,16438977-16444415	16471613-16481720
TCONS_00074370	LOC_Os06g28930	16436588-16437825,16438691-16438784,16438977-16444415	16496103-16498936
TCONS_00074370	LOC_Os06g28960	16436588-16437825,16438691-16438784,16438977-16444415	16506995-16507947
TCONS_00074370	LOC_Os06g28980	16436588-16437825,16438691-16438784,16438977-16444415	16515216-16518674
TCONS_00074370	LOC_Os06g28990	16436588-16437825,16438691-16438784,16438977-16444415	16520650-16526029
TCONS_00074370	LOC_Os06g29010	16436588-16437825,16438691-16438784,16438977-16444415	16534747-16535159
