# Supplementary material for: Transcriptome Analysis of Rice Reveals the lncRNA–mRNA Regulatory Network in Response to Rice Black-Streaked Dwarf Virus Infection
Source: Viruses. 2020 Aug 27;12(9):951. doi: 10.3390/v12090951 (PMC7552052; doi:10.3390/v12090951)
Supplement: Supplementary file 1 [file viruses-12-00951-s001.zip › Table S8. The 17335 mRNAs co-expressed with DElncRNAs.xlsx]

## Sheet: Sheet2
lncRNA_ID	Gene_ID	correlation coefficient
TCONS_00081336	LOC_Os01g22900	0.955085
TCONS_00081336	LOC_Os01g68770	0.958041
TCONS_00081336	LOC_Os02g44870	0.959093
TCONS_00081336	LOC_Os01g35040	0.954991
TCONS_00081336	LOC_Os06g49790	0.960674
TCONS_00081336	LOC_Os02g32120	0.966588
TCONS_00081336	LOC_Os05g48340	0.977204
TCONS_00081336	LOC_Os02g36340	0.954731
TCONS_00081336	LOC_Os03g61210	0.950159
TCONS_00081336	LOC_Os09g35730	0.982477
TCONS_00081336	LOC_Os04g57810	0.961387
TCONS_00081336	LOC_Os12g06630	0.985861
TCONS_00081336	LOC_Os03g12820	0.960658
TCONS_00081336	LOC_Os01g22630	0.957338
TCONS_00081336	LOC_Os10g39670	0.963882
TCONS_00081336	LOC_Os05g50230	0.986242
TCONS_00081336	LOC_Os04g30890	0.965691
TCONS_00081336	LOC_Os02g45000	0.996901
TCONS_00081336	LOC_Os04g52840	0.955608
TCONS_00081336	LOC_Os05g07940	0.960664
TCONS_00081336	LOC_Os10g37630	0.973825
TCONS_00081336	LOC_Os02g15950	0.970005
TCONS_00081336	LOC_Os01g09010	0.954538
TCONS_00081336	LOC_Os09g27950	0.978204
TCONS_00081336	LOC_Os01g08680	0.990468
TCONS_00081336	LOC_Os01g38530	0.977575
TCONS_00081336	LOC_Os07g18120	0.979983
TCONS_00081336	LOC_Os07g14150	0.970576
TCONS_00081336	LOC_Os03g49440	0.950351
TCONS_00081336	LOC_Os02g40040	0.981513
TCONS_00081336	LOC_Os06g04800	0.983932
TCONS_00081336	LOC_Os03g59190	0.975596
TCONS_00081336	LOC_Os09g24850	0.952203
TCONS_00081336	LOC_Os12g29400	0.982798
TCONS_00081336	LOC_Os05g51130	0.988822
TCONS_00081336	LOC_Os02g35870	0.959342
TCONS_00081336	LOC_Os12g15350	0.959242
TCONS_00081336	LOC_Os02g49360	0.950073
TCONS_00081336	LOC_Os03g61150	0.970205
TCONS_00081336	LOC_Os03g14370	0.955431
TCONS_00081336	LOC_Os02g46030	0.960954
TCONS_00081336	LOC_Os03g23800	0.952527
TCONS_00081336	LOC_Os05g48980	0.959668
TCONS_00081336	LOC_Os12g38670	0.955389
TCONS_00081336	LOC_Os03g20840	0.951636
TCONS_00081336	LOC_Os01g12430	0.965818
TCONS_00081336	LOC_Os08g38210	0.971544
TCONS_00081336	LOC_Os04g51770	0.957037
TCONS_00081336	LOC_Os08g05400	0.959589
TCONS_00081336	LOC_Os05g10620	0.992861
TCONS_00081336	LOC_Os03g09140	0.954425
TCONS_00081336	LOC_Os02g49230	0.95176
TCONS_00081336	LOC_Os01g55110	0.977267
TCONS_00081336	LOC_Os10g41550	0.962449
TCONS_00081336	LOC_Os03g05110	0.964043
TCONS_00081336	LOC_Os09g13800	0.950444
TCONS_00081336	LOC_Os01g64790	0.972811
TCONS_00081336	LOC_Os05g50570	0.988907
TCONS_00081336	LOC_Os08g29930	0.967554
TCONS_00081336	LOC_Os02g45780	0.960157
TCONS_00081336	LOC_Os09g23360	0.957409
TCONS_00081336	LOC_Os12g04360	0.950863
TCONS_00081336	LOC_Os05g27610	0.980619
TCONS_00081336	LOC_Os08g28710	0.950152
TCONS_00081336	LOC_Os09g28970	0.95538
TCONS_00081336	LOC_Os04g40900	0.95566
TCONS_00081336	LOC_Os03g23860	0.972874
TCONS_00081336	LOC_Os03g16150	0.953847
TCONS_00081336	LOC_Os01g15480	0.959428
TCONS_00081336	LOC_Os03g16530	0.950041
TCONS_00081336	LOC_Os03g61160	0.96551
TCONS_00081336	LOC_Os01g62710	0.983403
TCONS_00081336	LOC_Os03g50280	0.983692
TCONS_00081336	LOC_Os03g01990	0.984795
TCONS_00081336	LOC_Os04g10030	0.982712
TCONS_00081336	LOC_Os04g50790	0.957152
TCONS_00081336	LOC_Os01g54420	0.95772
TCONS_00081336	LOC_Os06g38650	0.964649
TCONS_00081336	LOC_Os06g30070	0.958759
TCONS_00081336	LOC_Os07g16400	0.957051
TCONS_00081336	LOC_Os11g28410	0.953512
TCONS_00081336	LOC_Os04g39780	0.968695
TCONS_00081336	LOC_Os04g43680	0.955627
TCONS_00081336	LOC_Os04g59080	0.953567
TCONS_00081336	LOC_Os05g14510	0.958607
TCONS_00081336	LOC_Os05g33490	0.950715
TCONS_00081336	LOC_Os01g11920	0.980761
TCONS_00081336	LOC_Os03g41960	0.955256
TCONS_00081336	LOC_Os04g04900	0.976398
TCONS_00081336	LOC_Os06g34140	0.976014
TCONS_00081336	LOC_Os06g25890	0.967769
TCONS_00081336	LOC_Os12g43060	0.975567
TCONS_00081336	LOC_Os12g34350	0.97248
TCONS_00081336	LOC_Os05g29110	0.950175
TCONS_00081336	LOC_Os02g51590	0.96875
TCONS_00081336	LOC_Os12g33330	0.951317
TCONS_00081336	LOC_Os04g25600	0.950914
TCONS_00081336	LOC_Os08g12390	0.970127
TCONS_00081336	LOC_Os01g25402	0.954745
TCONS_00081336	LOC_Os11g42320	0.966175
TCONS_00081336	LOC_Os12g20110	0.951583
TCONS_00081336	LOC_Os03g35430	0.960511
TCONS_00081336	LOC_Os09g35660	0.96115
TCONS_00081336	LOC_Os07g14800	0.957706
TCONS_00081336	LOC_Os05g07350	0.987027
TCONS_00081336	LOC_Os03g49100	0.9608
TCONS_00081336	LOC_Os01g04050	0.956622
TCONS_00081336	LOC_Os06g26070	0.958889
TCONS_00081336	LOC_Os07g33240	0.957115
TCONS_00081336	LOC_Os04g05160	0.953052
TCONS_00081336	LOC_Os11g19830	0.976365
TCONS_00081336	LOC_Os02g19620	0.964958
TCONS_00081336	LOC_Os03g57808	0.979701
TCONS_00081336	LOC_Os12g10800	0.967395
TCONS_00081336	LOC_Os09g23120	0.967836
TCONS_00081336	LOC_Os10g12740	0.960907
TCONS_00081336	LOC_Os04g27810	0.968243
TCONS_00081336	LOC_Os05g46350	0.953102
TCONS_00081336	LOC_Os05g38720	0.973405
TCONS_00081336	LOC_Os04g31300	0.976121
TCONS_00081336	LOC_Os09g29000	0.962804
TCONS_00081336	LOC_Os06g26150	0.952249
TCONS_00081336	LOC_Os02g38630	0.952328
TCONS_00081336	LOC_Os04g18750	0.99098
TCONS_00081336	LOC_Os06g25880	0.972287
TCONS_00081336	LOC_Os07g06630	0.957294
TCONS_00081336	LOC_Os05g24680	0.985105
TCONS_00081336	LOC_Os07g25090	0.958609
TCONS_00081336	LOC_Os04g24040	0.972708
TCONS_00081336	LOC_Os07g22410	0.955871
TCONS_00081336	LOC_Os12g31250	0.9667
TCONS_00081336	LOC_Os05g42930	0.957883
TCONS_00081336	LOC_Os01g01100	0.951712
TCONS_00081336	LOC_Os02g17400	0.989246
TCONS_00081336	LOC_Os01g02290	0.986995
TCONS_00081336	LOC_Os05g05910	0.953201
TCONS_00081336	LOC_Os01g37350	0.979713
TCONS_00081336	LOC_Os12g09480	0.955393
TCONS_00081336	LOC_Os02g34700	0.95514
TCONS_00081336	LOC_Os06g35840	0.957598
TCONS_00081336	LOC_Os09g04260	0.992326
TCONS_00081336	LOC_Os12g41040	0.967774
TCONS_00081336	LOC_Os01g54300	0.985831
TCONS_00081336	LOC_Os03g52540	0.969266
TCONS_00081336	LOC_Os04g59180	0.979975
TCONS_00081336	LOC_Os07g45610	0.973596
TCONS_00081336	LOC_Os09g04970	0.974246
TCONS_00081336	LOC_Os04g23470	0.956821
TCONS_00081336	LOC_Os09g13150	0.967248
TCONS_00081336	LOC_Os07g33820	0.971088
TCONS_00081336	LOC_Os08g08350	0.989214
TCONS_00081336	LOC_Os04g41690	0.964956
TCONS_00081336	LOC_Os07g11350	0.964405
TCONS_00081336	LOC_Os09g19970	0.96829
TCONS_00081336	LOC_Os01g25760	0.964727
TCONS_00081336	LOC_Os07g02230	0.956528
TCONS_00081336	LOC_Os08g30110	0.955841
TCONS_00081336	LOC_Os12g15340	0.958781
TCONS_00081336	LOC_Os05g13460	0.950896
TCONS_00081336	LOC_Os09g31970	0.972032
TCONS_00081336	LOC_Os12g39760	0.973714
TCONS_00081336	LOC_Os05g25470	0.96878
TCONS_00081336	LOC_Os09g04740	0.955948
TCONS_00081336	LOC_Os11g32420	0.973152
TCONS_00081336	LOC_Os02g28640	0.968835
TCONS_00081336	LOC_Os09g14720	0.950707
TCONS_00081336	LOC_Os07g40050	0.96722
TCONS_00081336	LOC_Os12g28490	0.962668
TCONS_00081336	LOC_Os01g41960	0.965965
TCONS_00081336	LOC_Os11g24012	0.960184
TCONS_00081336	LOC_Os07g14250	0.960149
TCONS_00081336	LOC_Os04g17140	0.962595
TCONS_00081336	LOC_Os12g18320	0.955076
TCONS_00081336	LOC_Os11g40770	0.987552
TCONS_00081336	LOC_Os01g08250	0.951114
TCONS_00081336	LOC_Os11g46250	0.952683
TCONS_00081336	LOC_Os01g72270	0.981931
TCONS_00081336	LOC_Os12g41200	0.969159
TCONS_00081336	LOC_Os08g05250	0.953791
TCONS_00081336	LOC_Os03g53220	0.957233
TCONS_00081336	LOC_Os01g58570	0.976478
TCONS_00081336	LOC_Os01g23020	0.971271
TCONS_00081336	LOC_Os03g31890	0.951626
TCONS_00081336	LOC_Os01g22170	0.975101
TCONS_00081336	LOC_Os07g44240	0.950526
TCONS_00081336	LOC_Os04g02960	0.95223
TCONS_00081336	LOC_Os05g19220	0.971143
TCONS_00081336	LOC_Os08g42120	0.990861
TCONS_00081336	LOC_Os11g28700	0.952698
TCONS_00081336	LOC_Os08g20849	0.953367
TCONS_00081336	LOC_Os09g16640	0.984537
TCONS_00081336	LOC_Os01g16160	0.968904
TCONS_00081336	LOC_Os09g12890	0.972424
TCONS_00081336	LOC_Os08g12210	0.981822
TCONS_00081336	LOC_Os03g35390	0.970732
TCONS_00081336	LOC_Os06g42570	0.958414
TCONS_00081336	LOC_Os01g28550	0.956444
TCONS_00081336	LOC_Os04g31860	0.958037
TCONS_00081336	LOC_Os08g19220	0.966506
TCONS_00081336	LOC_Os01g36360	0.962594
TCONS_00081336	LOC_Os03g44360	0.969916
TCONS_00081336	LOC_Os04g11240	0.96795
TCONS_00081336	LOC_Os07g26390	0.955457
TCONS_00081336	LOC_Os04g25890	0.958936
TCONS_00081336	LOC_Os07g45620	0.968487
TCONS_00081336	LOC_Os08g34850	0.975339
TCONS_00081336	LOC_Os06g49390	0.959882
TCONS_00081336	LOC_Os11g36200	0.955202
TCONS_00081336	LOC_Os06g45880	0.951512
TCONS_00081336	LOC_Os03g02874	0.961884
TCONS_00081336	LOC_Os06g13540	0.950625
TCONS_00081336	LOC_Os02g24860	0.962373
TCONS_00081336	LOC_Os01g35070	0.952067
TCONS_00081336	LOC_Os03g31200	0.972328
TCONS_00081336	LOC_Os12g26790	0.959757
TCONS_00081336	LOC_Os09g01820	0.974916
TCONS_00081336	LOC_Os02g34450	0.968714
TCONS_00081336	LOC_Os02g22790	0.977516
TCONS_00081336	LOC_Os05g17260	0.95617
TCONS_00081336	LOC_Os01g31730	0.954546
TCONS_00081336	LOC_Os09g14260	0.955356
TCONS_00081336	LOC_Os08g26920	0.985962
TCONS_00081336	LOC_Os09g07070	0.971449
TCONS_00081336	LOC_Os09g08870	0.978229
TCONS_00081336	LOC_Os04g21210	0.974275
TCONS_00081336	LOC_Os01g25040	0.958078
TCONS_00081336	LOC_Os06g19080	0.976418
TCONS_00081336	LOC_Os03g33940	0.960922
TCONS_00081336	LOC_Os01g32230	0.957249
TCONS_00081336	LOC_Os05g18880	0.966446
TCONS_00081336	LOC_Os01g22180	0.972138
TCONS_00081336	LOC_Os06g14570	0.958741
TCONS_00081336	LOC_Os02g30400	0.953083
TCONS_00081336	LOC_Os02g23820	0.97631
TCONS_00081336	LOC_Os12g02010	0.953363
TCONS_00081336	LOC_Os04g03940	0.958152
TCONS_00081336	LOC_Os03g33828	0.98149
TCONS_00081336	LOC_Os05g23370	0.981816
TCONS_00081336	LOC_Os05g17100	0.959856
TCONS_00081336	LOC_Os06g37720	0.965059
TCONS_00081336	LOC_Os02g11730	0.960734
TCONS_00081336	LOC_Os03g31650	0.967086
TCONS_00081336	LOC_Os02g14560	0.971407
TCONS_00081336	LOC_Os09g14430	0.976398
TCONS_00081336	LOC_Os09g13750	0.96176
TCONS_00081336	LOC_Os03g33760	0.955655
TCONS_00081336	LOC_Os06g22770	0.961887
TCONS_00081336	LOC_Os09g09000	0.952036
TCONS_00081336	LOC_Os10g29980	0.978764
TCONS_00081336	LOC_Os09g01530	0.965193
TCONS_00081336	LOC_Os12g12150	0.974127
TCONS_00081336	LOC_Os05g05000	0.969781
TCONS_00081336	LOC_Os12g33360	0.951655
TCONS_00081336	LOC_Os04g13510	0.969104
TCONS_00081336	LOC_Os03g32940	0.953709
TCONS_00081336	LOC_Os07g25190	0.955419
TCONS_00081336	LOC_Os09g17152	0.962982
TCONS_00081336	LOC_Os09g38200	0.965696
TCONS_00081336	LOC_Os01g02940	0.987463
TCONS_00081336	LOC_Os03g58900	0.963269
TCONS_00081336	LOC_Os04g45950	0.95494
TCONS_00081336	LOC_Os09g29920	0.956318
TCONS_00081336	LOC_Os08g41020	0.959698
TCONS_00081336	LOC_Os05g05050	0.963214
TCONS_00081336	LOC_Os02g49120	0.986515
TCONS_00081336	LOC_Os04g16810	0.973203
TCONS_00081336	LOC_Os01g25860	0.951655
TCONS_00081336	LOC_Os05g48550	0.953999
TCONS_00081336	LOC_Os03g14760	0.951748
TCONS_00081336	LOC_Os11g12710	0.972242
TCONS_00081336	LOC_Os12g36150	0.973139
TCONS_00081336	LOC_Os06g15500	0.953576
TCONS_00081336	LOC_Os12g20210	0.951396
TCONS_00081336	LOC_Os10g06380	0.972922
TCONS_00081336	LOC_Os01g35740	0.989344
TCONS_00081336	LOC_Os04g24370	0.959282
TCONS_00081336	LOC_Os08g38940	0.979289
TCONS_00081336	LOC_Os04g48900	0.977723
TCONS_00081336	LOC_Os05g15580	0.984179
TCONS_00081336	LOC_Os04g04940	0.960662
TCONS_00081336	LOC_Os01g73320	0.958724
TCONS_00081336	LOC_Os05g28120	0.961802
TCONS_00081336	LOC_Os11g37820	0.969664
TCONS_00081336	LOC_Os07g47740	0.991164
TCONS_00081336	LOC_Os05g09080	0.988448
TCONS_00081336	LOC_Os03g14060	0.953171
TCONS_00081336	LOC_Os05g36940	0.968484
TCONS_00081336	LOC_Os07g29850	0.953981
TCONS_00081336	LOC_Os01g02250	0.972531
TCONS_00081336	LOC_Os02g06050	0.963708
TCONS_00081336	LOC_Os12g28290	0.972289
TCONS_00081336	LOC_Os07g15340	0.95191
TCONS_00081336	LOC_Os11g29570	0.963662
TCONS_00081336	LOC_Os04g18640	0.979827
TCONS_00081336	LOC_Os07g16590	0.974513
TCONS_00081336	LOC_Os06g16100	0.975304
TCONS_00081336	LOC_Os04g03490	0.964682
TCONS_00081336	LOC_Os05g15470	0.955461
TCONS_00081336	LOC_Os10g12570	0.979958
TCONS_00081336	LOC_Os01g34250	0.974909
TCONS_00081336	LOC_Os05g10470	0.963203
TCONS_00081336	LOC_Os03g35540	0.967989
TCONS_00081336	LOC_Os07g15080	0.988366
TCONS_00081336	LOC_Os07g45020	0.971321
TCONS_00081336	LOC_Os09g04130	0.952204
TCONS_00081336	LOC_Os08g11570	0.999946
TCONS_00081336	LOC_Os11g19420	0.981244
TCONS_00081336	LOC_Os05g30270	0.991466
TCONS_00081336	LOC_Os01g54740	0.967686
TCONS_00081336	LOC_Os10g09350	0.969935
TCONS_00081336	LOC_Os05g26230	0.988437
TCONS_00081336	LOC_Os09g15300	0.961991
TCONS_00081336	LOC_Os10g11190	0.979939
TCONS_00081336	LOC_Os04g17280	0.972244
TCONS_00081336	LOC_Os12g36470	0.982317
TCONS_00081336	LOC_Os02g20100	0.978655
TCONS_00081336	LOC_Os03g45550	0.961643
TCONS_00081336	LOC_Os07g37670	0.952361
TCONS_00081336	LOC_Os03g18490	0.993631
TCONS_00081336	LOC_Os04g41370	0.961248
TCONS_00081336	LOC_Os12g26444	0.977355
TCONS_00081336	LOC_Os02g09790	0.963444
TCONS_00081336	LOC_Os11g44430	0.978588
TCONS_00081336	LOC_Os12g20060	0.97245
TCONS_00081336	LOC_Os02g04150	0.96723
TCONS_00081336	LOC_Os10g24560	0.984922
TCONS_00081336	LOC_Os05g10890	0.96703
TCONS_00081336	LOC_Os08g31540	0.965476
TCONS_00081336	LOC_Os02g39110	0.96794
TCONS_00081336	LOC_Os02g39450	0.959672
TCONS_00081336	LOC_Os02g51230	0.966112
TCONS_00081336	LOC_Os08g27410	0.955328
TCONS_00081336	LOC_Os03g60050	0.980158
TCONS_00081336	LOC_Os08g42860	0.996627
TCONS_00081336	LOC_Os03g30450	0.97469
TCONS_00081336	LOC_Os04g05880	0.976451
TCONS_00081336	LOC_Os02g46230	0.972019
TCONS_00081336	LOC_Os01g10390	0.964269
TCONS_00081336	LOC_Os12g27150	0.955804
TCONS_00081336	LOC_Os03g33280	0.974148
TCONS_00081336	LOC_Os12g23920	0.955042
TCONS_00081336	LOC_Os03g33140	0.973163
TCONS_00081336	LOC_Os09g25870	0.954675
TCONS_00081336	LOC_Os07g16560	0.987935
TCONS_00081336	LOC_Os05g16390	0.972399
TCONS_00081336	LOC_Os04g24690	0.95074
TCONS_00081336	LOC_Os08g24220	0.978199
TCONS_00081336	LOC_Os06g33820	0.966845
TCONS_00081336	LOC_Os06g05500	0.959863
TCONS_00081336	LOC_Os07g18340	0.979275
TCONS_00081336	LOC_Os08g23480	0.9888
TCONS_00081336	LOC_Os02g27520	0.968089
TCONS_00081336	LOC_Os10g06410	0.960637
TCONS_00081336	LOC_Os02g18560	0.959922
TCONS_00081336	LOC_Os07g23440	0.986426
TCONS_00081336	LOC_Os09g07890	0.957549
TCONS_00081336	LOC_Os03g05850	0.972355
TCONS_00081336	LOC_Os03g39594	0.959005
TCONS_00081336	LOC_Os12g30200	0.952857
TCONS_00081336	LOC_Os07g05600	0.953636
TCONS_00081336	LOC_Os09g02760	0.968041
TCONS_00081336	LOC_Os07g27900	0.984166
TCONS_00081336	LOC_Os07g24940	0.952328
TCONS_00081336	LOC_Os12g27780	0.952709
TCONS_00081336	LOC_Os10g06430	0.960027
TCONS_00081336	LOC_Os11g02780	0.990098
TCONS_00081336	LOC_Os06g11110	0.978253
TCONS_00081336	LOC_Os12g06350	0.98726
TCONS_00081336	LOC_Os08g08550	0.96444
TCONS_00081336	LOC_Os09g05060	0.974467
TCONS_00081336	LOC_Os09g13670	0.952067
TCONS_00081336	LOC_Os07g25630	0.954927
TCONS_00081336	LOC_Os01g14200	0.953636
TCONS_00081336	LOC_Os08g28750	0.972116
TCONS_00081336	LOC_Os04g21200	0.953085
TCONS_00081336	LOC_Os12g40030	0.950013
TCONS_00081336	LOC_Os07g22550	0.965454
TCONS_00081336	LOC_Os06g48380	0.973722
TCONS_00081336	LOC_Os12g19900	0.99203
TCONS_00081336	LOC_Os06g23260	0.95237
TCONS_00081336	LOC_Os08g29690	0.988608
TCONS_00081336	LOC_Os05g16790	0.975811
TCONS_00081336	LOC_Os11g17200	0.959216
TCONS_00081336	LOC_Os11g46930	0.95815
TCONS_00081336	LOC_Os05g19560	0.988817
TCONS_00081336	LOC_Os01g23040	0.960109
TCONS_00081336	LOC_Os02g42750	0.967237
TCONS_00081336	LOC_Os03g31986	0.988719
TCONS_00081336	LOC_Os04g43464	0.977722
TCONS_00081336	LOC_Os02g44390	0.954977
TCONS_00081336	LOC_Os04g17290	0.971186
TCONS_00081336	LOC_Os12g13070	0.96984
TCONS_00081336	LOC_Os07g15790	0.971915
TCONS_00081336	LOC_Os10g01984	0.97119
TCONS_00081336	LOC_Os04g16860	0.962812
TCONS_00081336	LOC_Os02g14440	0.978044
TCONS_00081336	LOC_Os01g39020	0.962985
TCONS_00081336	LOC_Os11g45090	0.968002
TCONS_00081336	LOC_Os05g06390	0.960128
TCONS_00081336	LOC_Os09g07430	0.967784
TCONS_00081336	LOC_Os02g30300	0.964791
TCONS_00081336	LOC_Os10g40400	0.970854
TCONS_00081336	LOC_Os10g28000	0.976185
TCONS_00081336	LOC_Os01g74370	0.989455
TCONS_00081336	LOC_Os04g32940	0.969694
TCONS_00081336	LOC_Os12g22260	0.955101
TCONS_00081336	LOC_Os11g39990	0.959942
TCONS_00081336	LOC_Os01g35504	0.978824
TCONS_00081336	LOC_Os12g26780	0.964532
TCONS_00081336	LOC_Os08g30680	0.972751
TCONS_00081336	LOC_Os11g24950	0.961055
TCONS_00081336	LOC_Os04g16630	0.956594
TCONS_00081336	LOC_Os09g11220	0.98762
TCONS_00081336	LOC_Os08g17420	0.954025
TCONS_00081336	LOC_Os04g09284	0.978347
TCONS_00081336	LOC_Os08g22540	0.951171
TCONS_00081336	LOC_Os01g19940	0.974984
TCONS_00081336	LOC_Os05g18210	0.950963
TCONS_00081336	LOC_Os01g23900	0.950859
TCONS_00081336	LOC_Os09g22030	0.956962
TCONS_00081336	LOC_Os08g27674	0.965414
TCONS_00081336	LOC_Os02g37630	0.984847
TCONS_00081336	LOC_Os08g23580	0.962317
TCONS_00081336	LOC_Os08g32030	0.970955
TCONS_00081336	LOC_Os08g11780	0.954287
TCONS_00081336	LOC_Os04g14890	0.957225
TCONS_00081336	LOC_Os09g12420	0.985675
TCONS_00081336	LOC_Os04g06610	0.981082
TCONS_00081336	LOC_Os06g48370	0.973722
TCONS_00081336	LOC_Os07g15690	0.954065
TCONS_00081336	LOC_Os07g46140	0.9556
TCONS_00081336	LOC_Os06g34320	0.990723
TCONS_00081336	LOC_Os01g34840	0.98295
TCONS_00081336	LOC_Os01g06160	0.988387
TCONS_00081336	LOC_Os04g04590	0.997448
TCONS_00081336	LOC_Os09g01070	0.976218
TCONS_00081336	LOC_Os05g09230	0.983446
TCONS_00081336	LOC_Os12g39150	0.983466
TCONS_00081336	LOC_Os06g16320	0.965186
TCONS_00081336	LOC_Os09g13100	0.965092
TCONS_00081336	LOC_Os02g30040	0.971515
TCONS_00081336	LOC_Os11g40920	0.970758
TCONS_00081336	LOC_Os03g36030	0.979059
TCONS_00081336	LOC_Os06g14680	0.975226
TCONS_00081336	LOC_Os03g33680	0.968564
TCONS_00081336	LOC_Os12g05490	0.962323
TCONS_00081336	LOC_Os02g38650	0.951531
TCONS_00081336	LOC_Os03g42610	0.967585
TCONS_00081336	LOC_Os11g15090	0.974172
TCONS_00081336	LOC_Os04g09980	0.97634
TCONS_00081336	LOC_Os02g16190	0.961945
TCONS_00081336	LOC_Os01g29750	0.959555
TCONS_00081336	LOC_Os04g16430	0.956231
TCONS_00081336	LOC_Os04g04180	0.960689
TCONS_00081336	LOC_Os08g17180	0.951201
TCONS_00081336	LOC_Os08g06310	0.972023
TCONS_00081336	LOC_Os12g24364	0.978178
TCONS_00081336	LOC_Os11g05920	0.952818
TCONS_00081336	LOC_Os12g10500	0.983733
TCONS_00081336	LOC_Os04g01439	0.950191
TCONS_00081336	LOC_Os05g01650	0.963994
TCONS_00081336	LOC_Os11g45690	0.953821
TCONS_00081336	LOC_Os05g09110	0.976673
TCONS_00081336	LOC_Os11g15350	0.975222
TCONS_00081336	LOC_Os04g23570	0.993008
TCONS_00081336	LOC_Os05g37590	0.950169
TCONS_00081336	LOC_Os02g13750	0.985795
TCONS_00081336	LOC_Os03g16300	0.956488
TCONS_00081336	LOC_Os08g33760	0.960696
TCONS_00081336	LOC_Os11g21830	0.959468
TCONS_00081336	LOC_Os01g55470	0.981448
TCONS_00081336	LOC_Os11g28400	0.979533
TCONS_00081336	LOC_Os05g25300	0.983323
TCONS_00081336	LOC_Os04g19360	0.954634
TCONS_00081336	LOC_Os07g45970	0.987935
TCONS_00081336	LOC_Os08g15990	0.963034
TCONS_00081336	LOC_Os08g10140	0.992306
TCONS_00081336	LOC_Os05g45160	0.990413
TCONS_00081336	LOC_Os10g35160	0.968284
TCONS_00081336	LOC_Os04g52110	0.961905
TCONS_00081336	LOC_Os03g21800	0.983128
TCONS_00081336	LOC_Os04g42740	0.955629
TCONS_00081336	LOC_Os05g26040	0.986436
TCONS_00081336	LOC_Os09g14730	0.967353
TCONS_00081336	LOC_Os12g24510	0.961377
TCONS_00081336	LOC_Os11g35580	0.969493
TCONS_00081336	LOC_Os04g02250	0.969415
TCONS_00081336	LOC_Os03g62810	0.962402
TCONS_00081336	LOC_Os02g17550	0.969477
TCONS_00081336	LOC_Os07g01490	0.967607
TCONS_00081336	LOC_Os07g18450	0.978952
TCONS_00081336	LOC_Os05g50910	0.966721
TCONS_00081336	LOC_Os04g50850	0.950763
TCONS_00081336	LOC_Os11g44640	0.97708
TCONS_00081336	LOC_Os11g03160	0.98598
TCONS_00081336	LOC_Os11g16750	0.979125
TCONS_00081336	LOC_Os08g22284	0.956268
TCONS_00081336	LOC_Os04g18900	0.969151
TCONS_00081336	LOC_Os01g19460	0.955607
TCONS_00081336	LOC_Os11g22940	0.981015
TCONS_00081336	LOC_Os06g42800	0.954561
TCONS_00081336	LOC_Os01g28089	0.970199
TCONS_00081336	LOC_Os04g20140	0.983709
TCONS_00081336	LOC_Os10g13370	0.969927
TCONS_00081336	LOC_Os04g22110	0.962395
TCONS_00081336	LOC_Os11g35920	0.989275
TCONS_00081336	LOC_Os02g20800	0.962256
TCONS_00081336	LOC_Os09g02030	0.953636
TCONS_00081336	LOC_Os04g17190	0.963601
TCONS_00081336	LOC_Os12g10680	0.971432
TCONS_00081336	LOC_Os03g55660	0.981989
TCONS_00081336	LOC_Os09g10430	0.96248
TCONS_00081336	LOC_Os08g23400	0.962262
TCONS_00081336	LOC_Os08g08420	0.991721
TCONS_00081336	LOC_Os03g40580	0.968752
TCONS_00081336	LOC_Os02g58780	0.979205
TCONS_00081336	LOC_Os04g09700	0.98751
TCONS_00081336	LOC_Os06g38260	0.956646
TCONS_00081336	LOC_Os02g26060	0.950987
TCONS_00081336	LOC_Os07g27370	0.95596
TCONS_00081336	LOC_Os01g63960	0.979571
TCONS_00081336	LOC_Os08g16420	0.957823
TCONS_00081336	LOC_Os10g37610	0.979077
TCONS_00081336	LOC_Os08g23330	0.962072
TCONS_00081336	LOC_Os12g28990	0.97528
TCONS_00081336	LOC_Os11g12730	0.969687
TCONS_00081336	LOC_Os03g30370	0.9791
TCONS_00081336	LOC_Os06g44480	0.955678
TCONS_00081336	LOC_Os05g41830	0.956993
TCONS_00081336	LOC_Os12g39540	0.963824
TCONS_00081336	LOC_Os12g15290	0.953132
TCONS_00081336	ChrSy.fgenesh.gene.48	0.955237
TCONS_00081336	LOC_Os01g27420	0.968667
TCONS_00081336	LOC_Os11g09300	0.970638
TCONS_00081336	LOC_Os11g30530	0.961492
TCONS_00081336	LOC_Os12g19760	0.952281
TCONS_00081336	LOC_Os02g45680	0.951529
TCONS_00081336	LOC_Os08g25330	0.954036
TCONS_00081336	LOC_Os04g07650	0.974596
TCONS_00081336	LOC_Os01g18570	0.976457
TCONS_00081336	LOC_Os08g23860	0.980086
TCONS_00081336	LOC_Os03g36600	0.969502
TCONS_00081336	LOC_Os03g46830	0.950597
TCONS_00081336	LOC_Os08g26430	0.950848
TCONS_00081336	LOC_Os08g18140	0.969889
TCONS_00081336	LOC_Os03g21290	0.958318
TCONS_00081336	LOC_Os03g35560	0.950389
TCONS_00081336	LOC_Os09g14370	0.987011
TCONS_00081336	LOC_Os06g21440	0.960611
TCONS_00081336	LOC_Os07g40610	0.977723
TCONS_00081336	LOC_Os04g54260	0.9731
TCONS_00081336	LOC_Os05g18380	0.99533
TCONS_00081336	LOC_Os06g37935	0.965142
TCONS_00081336	LOC_Os04g09310	0.966517
TCONS_00081336	LOC_Os04g12130	0.952185
TCONS_00081336	LOC_Os07g39230	0.980546
TCONS_00081336	LOC_Os02g52050	0.962612
TCONS_00081336	LOC_Os05g18340	0.951029
TCONS_00081336	LOC_Os07g15350	0.987395
TCONS_00081336	LOC_Os03g45030	0.961645
TCONS_00081336	LOC_Os08g36160	0.951028
TCONS_00081336	LOC_Os03g24780	0.957837
TCONS_00081336	LOC_Os01g51950	0.985237
TCONS_00081336	LOC_Os04g21220	0.968951
TCONS_00081336	LOC_Os11g45610	0.963074
TCONS_00081336	LOC_Os08g27000	0.984792
TCONS_00081336	LOC_Os12g16380	0.957882
TCONS_00081336	LOC_Os11g14580	0.977665
TCONS_00081336	LOC_Os06g13500	0.989497
TCONS_00081336	LOC_Os05g44786	0.965021
TCONS_00081336	LOC_Os08g22890	0.981226
TCONS_00081336	LOC_Os03g29900	0.983052
TCONS_00081336	LOC_Os11g19960	0.963538
TCONS_00081336	LOC_Os12g29310	0.978601
TCONS_00081336	LOC_Os06g07500	0.950188
TCONS_00081336	LOC_Os04g19900	0.966822
TCONS_00081336	LOC_Os05g15570	0.964166
TCONS_00081336	LOC_Os01g27090	0.955334
TCONS_00081336	LOC_Os12g13330	0.966484
TCONS_00081336	LOC_Os08g10710	0.986767
TCONS_00081336	LOC_Os02g28380	0.96666
TCONS_00081336	LOC_Os04g19080	0.950923
TCONS_00081336	LOC_Os04g02600	0.960167
TCONS_00081336	LOC_Os08g16240	0.953779
TCONS_00081336	LOC_Os06g08410	0.972182
TCONS_00081336	LOC_Os05g18180	0.950551
TCONS_00081336	LOC_Os07g22200	0.953769
TCONS_00081336	LOC_Os11g25590	0.987494
TCONS_00081336	LOC_Os09g06780	0.955766
TCONS_00081336	LOC_Os04g29900	0.956475
TCONS_00081336	LOC_Os05g26330	0.967596
TCONS_00081336	LOC_Os12g38840	0.953754
TCONS_00081336	LOC_Os01g28390	0.981825
TCONS_00081336	LOC_Os03g57370	0.95135
TCONS_00081336	LOC_Os12g25990	0.971288
TCONS_00081336	LOC_Os03g37750	0.974932
TCONS_00081336	LOC_Os08g19970	0.951999
TCONS_00081336	LOC_Os10g31350	0.962787
TCONS_00081336	LOC_Os07g24100	0.987907
TCONS_00081336	LOC_Os01g33950	0.977146
TCONS_00081336	LOC_Os04g03920	0.966227
TCONS_00081336	LOC_Os07g42690	0.965352
TCONS_00081336	LOC_Os03g12500	0.96532
TCONS_00081336	LOC_Os08g44720	0.981317
TCONS_00081336	LOC_Os03g12310	0.952971
TCONS_00081336	LOC_Os03g56910	0.950296
TCONS_00081336	LOC_Os06g19854	0.960982
TCONS_00081336	LOC_Os03g33230	0.984147
TCONS_00081336	LOC_Os02g13410	0.976997
TCONS_00081336	LOC_Os09g06820	0.959778
TCONS_00081336	LOC_Os09g16430	0.970056
TCONS_00081336	LOC_Os09g21290	0.956073
TCONS_00081336	LOC_Os08g28600	0.955676
TCONS_00081336	LOC_Os02g45220	0.971888
TCONS_00081336	LOC_Os06g37290	0.974676
TCONS_00081336	LOC_Os01g02930	0.969313
TCONS_00081336	LOC_Os03g49090	0.960476
TCONS_00081336	LOC_Os09g31230	0.977117
TCONS_00081336	LOC_Os01g25580	0.992165
TCONS_00081336	LOC_Os09g27290	0.953804
TCONS_00081336	LOC_Os06g29050	0.969346
TCONS_00081336	LOC_Os07g42234	0.972124
TCONS_00081336	LOC_Os03g42950	0.982705
TCONS_00081336	LOC_Os05g16950	0.972114
TCONS_00081336	LOC_Os10g32630	0.971322
TCONS_00081336	LOC_Os08g29430	0.968482
TCONS_00081336	LOC_Os07g03015	0.961944
TCONS_00081336	LOC_Os01g31420	0.968727
TCONS_00081336	LOC_Os08g34860	0.981858
TCONS_00081336	LOC_Os02g40330	0.965062
TCONS_00081336	LOC_Os06g34150	0.963509
TCONS_00081336	LOC_Os06g28660	0.958276
TCONS_00081336	LOC_Os12g44120	0.953802
TCONS_00081336	LOC_Os05g04500	0.954003
TCONS_00081336	LOC_Os08g20800	0.963768
TCONS_00081336	LOC_Os03g43750	0.968318
TCONS_00081336	LOC_Os09g08224	0.982131
TCONS_00081336	LOC_Os11g24150	0.976574
TCONS_00081336	LOC_Os04g26700	0.990922
TCONS_00081336	LOC_Os11g07225	0.955346
TCONS_00081336	LOC_Os05g04210	0.950047
TCONS_00081336	LOC_Os05g22530	0.967583
TCONS_00081336	LOC_Os04g14430	0.994679
TCONS_00081336	LOC_Os05g20780	0.973073
TCONS_00081336	LOC_Os01g33750	0.962078
TCONS_00081336	LOC_Os07g17090	0.98575
TCONS_00081336	LOC_Os10g04150	0.956725
TCONS_00081336	LOC_Os03g26260	0.965989
TCONS_00081336	LOC_Os02g25770	0.983248
TCONS_00081336	LOC_Os11g25340	0.958794
TCONS_00081336	LOC_Os04g12950	0.959653
TCONS_00081336	LOC_Os04g21410	0.994529
TCONS_00081336	LOC_Os07g18790	0.962424
TCONS_00081336	LOC_Os06g23070	0.98277
TCONS_00081336	LOC_Os05g26160	0.955399
TCONS_00081336	LOC_Os02g15820	0.981299
TCONS_00081336	LOC_Os03g51870	0.961743
TCONS_00081336	LOC_Os04g33820	0.988667
TCONS_00081336	LOC_Os07g25130	0.951476
TCONS_00081336	LOC_Os11g18620	0.963456
TCONS_00081336	LOC_Os09g06990	0.978984
TCONS_00081336	LOC_Os02g20000	0.953536
TCONS_00081336	LOC_Os05g35480	0.95107
TCONS_00081336	LOC_Os05g17170	0.96774
TCONS_00081336	LOC_Os09g21980	0.967457
TCONS_00081336	LOC_Os11g27910	0.962806
TCONS_00081336	LOC_Os02g29790	0.956552
TCONS_00081336	LOC_Os04g17370	0.970691
TCONS_00081336	LOC_Os03g52100	0.958802
TCONS_00081336	LOC_Os02g13240	0.974609
TCONS_00081336	LOC_Os04g25810	0.951506
TCONS_00081336	LOC_Os02g25260	0.966857
TCONS_00081336	LOC_Os05g06720	0.986861
TCONS_00081336	LOC_Os02g26500	0.978926
TCONS_00081336	LOC_Os01g08130	0.981755
TCONS_00081336	LOC_Os04g44090	0.974504
TCONS_00081336	LOC_Os09g07870	0.978249
TCONS_00081336	LOC_Os10g15340	0.964975
TCONS_00081336	LOC_Os03g17164	0.955711
TCONS_00081336	LOC_Os04g44180	0.952888
TCONS_00081336	LOC_Os09g17800	0.990656
TCONS_00081336	LOC_Os06g17040	0.969044
TCONS_00081336	LOC_Os12g44100	0.967122
TCONS_00081336	LOC_Os07g36720	0.974425
TCONS_00081336	LOC_Os08g35970	0.953004
TCONS_00081336	LOC_Os02g19260	0.953824
TCONS_00081336	LOC_Os02g05850	0.988301
TCONS_00081336	LOC_Os01g23470	0.96951
TCONS_00081336	LOC_Os01g66470	0.968612
TCONS_00081336	LOC_Os06g17680	0.974252
TCONS_00081336	LOC_Os03g49330	0.965468
TCONS_00081336	LOC_Os12g34250	0.986088
TCONS_00081336	LOC_Os06g07530	0.972271
TCONS_00081336	LOC_Os05g16410	0.965631
TCONS_00081336	LOC_Os11g47190	0.962928
TCONS_00081336	LOC_Os07g16570	0.965516
TCONS_00081336	LOC_Os09g39150	0.983556
TCONS_00081336	LOC_Os03g23140	0.964141
TCONS_00081336	LOC_Os09g39900	0.966276
TCONS_00081336	LOC_Os07g23920	0.950822
TCONS_00081336	LOC_Os02g22240	0.955186
TCONS_00081336	LOC_Os04g44370	0.992933
TCONS_00081336	LOC_Os11g14510	0.983569
TCONS_00081336	LOC_Os06g30560	0.992841
TCONS_00081336	LOC_Os08g32480	0.983483
TCONS_00081336	LOC_Os03g01080	0.973281
TCONS_00081336	LOC_Os01g35730	0.976071
TCONS_00081336	LOC_Os01g71520	0.968173
TCONS_00081336	LOC_Os02g26110	0.988125
TCONS_00081336	LOC_Os10g12270	0.990816
TCONS_00081336	LOC_Os04g55820	0.987114
TCONS_00081336	LOC_Os08g15940	0.981364
TCONS_00081336	LOC_Os05g21120	0.968917
TCONS_00081336	LOC_Os07g34310	0.969351
TCONS_00081336	LOC_Os08g03720	0.979946
TCONS_00081336	LOC_Os09g17370	0.961052
TCONS_00081336	LOC_Os12g19920	0.954702
TCONS_00081336	LOC_Os09g07850	0.959395
TCONS_00081336	LOC_Os12g33660	0.981024
TCONS_00081336	LOC_Os06g25110	0.991289
TCONS_00081336	LOC_Os11g23230	0.9583
TCONS_00081336	LOC_Os03g47880	0.958183
TCONS_00081336	LOC_Os01g20760	0.977557
TCONS_00081336	LOC_Os12g33800	0.973881
TCONS_00081336	LOC_Os07g17580	0.964663
TCONS_00081336	LOC_Os09g06790	0.985209
TCONS_00081336	LOC_Os09g23190	0.984995
TCONS_00081336	LOC_Os12g39950	0.984919
TCONS_00081336	LOC_Os03g60230	0.956254
TCONS_00081336	LOC_Os01g47870	0.951057
TCONS_00081336	LOC_Os11g17520	0.975511
TCONS_00081336	LOC_Os02g28020	0.955025
TCONS_00081336	LOC_Os11g21870	0.955582
TCONS_00081336	LOC_Os04g07340	0.970777
TCONS_00081336	LOC_Os04g19190	0.969952
TCONS_00081336	LOC_Os04g16510	0.972554
TCONS_00081336	LOC_Os04g13080	0.956931
TCONS_00081336	LOC_Os04g40360	0.987422
TCONS_00081336	LOC_Os03g04800	0.982773
TCONS_00081336	LOC_Os11g44150	0.982306
TCONS_00081336	LOC_Os02g46580	0.991987
TCONS_00081336	LOC_Os04g56260	0.971276
TCONS_00081336	LOC_Os11g46290	0.995488
TCONS_00081336	LOC_Os10g40800	0.954531
TCONS_00081336	LOC_Os04g10980	0.978048
TCONS_00081336	LOC_Os12g15900	0.985719
TCONS_00081336	LOC_Os10g02090	0.987776
TCONS_00081336	LOC_Os01g40460	0.952289
TCONS_00081336	LOC_Os07g20210	0.974009
TCONS_00081336	LOC_Os06g47180	0.97201
TCONS_00081336	LOC_Os01g50500	0.970064
TCONS_00081336	LOC_Os08g04880	0.990704
TCONS_00081336	LOC_Os09g28980	0.954215
TCONS_00081336	LOC_Os03g31620	0.967376
TCONS_00081336	LOC_Os01g59230	0.965197
TCONS_00081336	LOC_Os09g38950	0.952692
TCONS_00081336	LOC_Os11g35880	0.971958
TCONS_00081336	LOC_Os08g14560	0.972036
TCONS_00081336	LOC_Os07g15800	0.962551
TCONS_00081336	LOC_Os06g36620	0.953304
TCONS_00081336	LOC_Os08g15360	0.993064
TCONS_00081336	LOC_Os02g33920	0.965413
TCONS_00081336	LOC_Os02g53940	0.966356
TCONS_00081336	LOC_Os01g42920	0.982751
TCONS_00081336	LOC_Os05g17700	0.953652
TCONS_00081336	LOC_Os03g10280	0.982173
TCONS_00081336	LOC_Os10g24450	0.955179
TCONS_00081336	LOC_Os12g04840	0.950074
TCONS_00081336	LOC_Os05g26520	0.962596
TCONS_00081336	LOC_Os12g01650	0.969849
TCONS_00081336	LOC_Os01g02520	0.967103
TCONS_00081336	LOC_Os01g36400	0.984671
TCONS_00081336	LOC_Os01g29620	0.968793
TCONS_00081336	LOC_Os01g30990	0.953939
TCONS_00081336	LOC_Os05g35890	0.950944
TCONS_00081336	LOC_Os07g25870	0.953053
TCONS_00081336	LOC_Os04g51750	0.990225
TCONS_00081336	LOC_Os09g04400	0.955506
TCONS_00081336	LOC_Os04g14050	0.95492
TCONS_00081336	LOC_Os04g17640	0.974064
TCONS_00081336	LOC_Os01g22660	0.952363
TCONS_00081336	LOC_Os02g19270	0.985221
TCONS_00081336	LOC_Os09g27070	0.95196
TCONS_00081336	LOC_Os09g08340	0.984001
TCONS_00081336	LOC_Os08g21960	0.992925
TCONS_00081336	LOC_Os04g14860	0.986967
TCONS_00081336	LOC_Os03g32119	0.987984
TCONS_00081336	LOC_Os11g42260	0.977497
TCONS_00081336	LOC_Os07g41320	0.956255
TCONS_00081336	LOC_Os01g11140	0.984551
TCONS_00081336	LOC_Os05g45620	0.982228
TCONS_00081336	LOC_Os04g27730	0.95013
TCONS_00081336	LOC_Os06g08550	0.959117
TCONS_00081336	LOC_Os03g04080	0.995072
TCONS_00081336	LOC_Os12g09400	0.985093
TCONS_00081336	LOC_Os07g09740	0.968815
TCONS_00081336	LOC_Os10g13770	0.974834
TCONS_00081336	LOC_Os01g04220	0.965564
TCONS_00081336	LOC_Os04g38910	0.963547
TCONS_00081336	LOC_Os06g20710	0.977889
TCONS_00081336	LOC_Os05g35860	0.983986
TCONS_00081336	LOC_Os01g19930	0.977392
TCONS_00081336	ChrUn.fgenesh.gene.5	0.981134
TCONS_00081336	LOC_Os07g26430	0.960699
TCONS_00081336	LOC_Os04g11090	0.952788
TCONS_00081336	LOC_Os10g25890	0.995466
TCONS_00081336	LOC_Os10g15170	0.988941
TCONS_00081336	LOC_Os05g02820	0.974646
TCONS_00081336	LOC_Os11g23020	0.969441
TCONS_00081336	LOC_Os03g30100	0.951147
TCONS_00081336	LOC_Os01g22230	0.971836
TCONS_00081336	LOC_Os05g37970	0.976175
TCONS_00081336	LOC_Os03g57190	0.96655
TCONS_00081336	LOC_Os09g01500	0.951656
TCONS_00081336	LOC_Os09g01280	0.962326
TCONS_00081336	LOC_Os01g34970	0.971568
TCONS_00081336	LOC_Os05g25170	0.953261
TCONS_00081336	LOC_Os11g40760	0.972484
TCONS_00081336	LOC_Os11g36020	0.986135
TCONS_00081336	LOC_Os08g37540	0.958899
TCONS_00081336	LOC_Os09g26970	0.958938
TCONS_00081336	LOC_Os01g57890	0.979706
TCONS_00081336	LOC_Os03g21730	0.991817
TCONS_00081336	LOC_Os08g43000	0.97686
TCONS_00081336	LOC_Os02g30480	0.98559
TCONS_00081336	LOC_Os01g23550	0.958796
TCONS_00081336	LOC_Os11g35490	0.990693
TCONS_00081336	LOC_Os11g07130	0.967104
TCONS_00081336	LOC_Os02g19310	0.970018
TCONS_00081336	LOC_Os04g05980	0.953825
TCONS_00081336	LOC_Os12g06920	0.990211
TCONS_00081336	LOC_Os03g26020	0.968213
TCONS_00081336	LOC_Os09g14480	0.975524
TCONS_00081336	LOC_Os12g10340	0.959285
TCONS_00081336	LOC_Os12g23660	0.992049
TCONS_00081336	LOC_Os03g08120	0.954791
TCONS_00081336	LOC_Os07g22800	0.954554
TCONS_00081336	LOC_Os10g36960	0.960129
TCONS_00081336	LOC_Os01g18240	0.96808
TCONS_00081336	LOC_Os12g29730	0.980759
TCONS_00081336	LOC_Os08g06900	0.953304
TCONS_00081336	LOC_Os11g19350	0.980196
TCONS_00081336	LOC_Os01g59580	0.952716
TCONS_00081336	LOC_Os05g34350	0.976113
TCONS_00081336	LOC_Os03g08580	0.985652
TCONS_00081336	LOC_Os06g02740	0.997081
TCONS_00081336	LOC_Os10g17800	0.980019
TCONS_00081336	LOC_Os07g25910	0.970593
TCONS_00081336	LOC_Os07g32406	0.992414
TCONS_00081336	LOC_Os04g12420	0.978274
TCONS_00081336	LOC_Os06g22510	0.956645
TCONS_00081336	LOC_Os03g02240	0.96416
TCONS_00081336	LOC_Os04g48400	0.976009
TCONS_00081336	LOC_Os05g06640	0.964269
TCONS_00081336	LOC_Os04g17030	0.952394
TCONS_00081336	LOC_Os11g35330	0.96295
TCONS_00081336	LOC_Os07g14940	0.975947
TCONS_00081336	LOC_Os09g20090	0.98273
TCONS_00081336	LOC_Os06g26160	0.982076
TCONS_00081336	LOC_Os01g23090	0.98294
TCONS_00081336	LOC_Os09g20380	0.954316
TCONS_00081336	LOC_Os06g21000	0.973564
TCONS_00081336	LOC_Os10g18740	0.955901
TCONS_00081336	LOC_Os12g02080	0.97604
TCONS_00081336	LOC_Os08g28100	0.971979
TCONS_00081336	LOC_Os07g07830	0.965027
TCONS_00081336	LOC_Os05g18060	0.953305
TCONS_00081336	LOC_Os05g08720	0.973631
TCONS_00081336	LOC_Os01g50550	0.968726
TCONS_00081336	LOC_Os08g16540	0.95489
TCONS_00081336	LOC_Os12g28280	0.954287
TCONS_00081336	LOC_Os01g01900	0.967094
TCONS_00081336	LOC_Os10g37940	0.973105
TCONS_00081336	LOC_Os03g39570	0.977412
TCONS_00081336	LOC_Os03g23770	0.972693
TCONS_00081336	LOC_Os02g18030	0.956658
TCONS_00081336	LOC_Os04g23250	0.961316
TCONS_00081336	LOC_Os06g25550	0.959584
TCONS_00081336	LOC_Os11g18510	0.952823
TCONS_00081336	LOC_Os08g10050	0.980685
TCONS_00081336	LOC_Os08g32190	0.969866
TCONS_00081336	LOC_Os03g29290	0.983222
TCONS_00081336	LOC_Os02g37840	0.979989
TCONS_00081336	LOC_Os04g10890	0.979627
TCONS_00081336	LOC_Os03g35440	0.956911
TCONS_00081336	LOC_Os06g11300	0.982748
TCONS_00081336	LOC_Os01g74550	0.978948
TCONS_00081336	LOC_Os04g33150	0.953102
TCONS_00081336	LOC_Os01g56810	0.951217
TCONS_00081336	LOC_Os10g33060	0.952588
TCONS_00081336	LOC_Os04g06300	0.958356
TCONS_00081336	LOC_Os02g29270	0.951421
TCONS_00081336	LOC_Os06g25900	0.978595
TCONS_00081336	LOC_Os01g15039	0.959798
TCONS_00081336	LOC_Os12g35930	0.96334
TCONS_00081336	LOC_Os04g16340	0.956081
TCONS_00081336	LOC_Os10g32170	0.952634
TCONS_00081336	LOC_Os05g24290	0.983216
TCONS_00081336	LOC_Os08g22510	0.950125
TCONS_00081336	LOC_Os05g03100	0.964176
TCONS_00081336	LOC_Os08g03900	0.962011
TCONS_00081336	LOC_Os11g33938	0.971537
TCONS_00081336	LOC_Os03g33520	0.973973
TCONS_00081336	LOC_Os07g03260	0.951061
TCONS_00081336	LOC_Os04g06050	0.95433
TCONS_00081336	LOC_Os02g01470	0.9719
TCONS_00081336	LOC_Os09g11940	0.99039
TCONS_00081336	LOC_Os07g11220	0.978718
TCONS_00081336	LOC_Os06g04090	0.967552
TCONS_00081336	LOC_Os06g21990	0.979138
TCONS_00081336	LOC_Os06g18770	0.96173
TCONS_00081336	LOC_Os03g49610	0.950621
TCONS_00081336	LOC_Os04g30690	0.974567
TCONS_00081336	LOC_Os11g30240	0.950665
TCONS_00081336	LOC_Os10g20180	0.95798
TCONS_00081336	LOC_Os12g25330	0.977642
TCONS_00081336	LOC_Os07g17800	0.994038
TCONS_00081336	LOC_Os04g23240	0.978713
TCONS_00081336	LOC_Os07g12500	0.952968
TCONS_00081336	LOC_Os04g17770	0.984965
TCONS_00081336	LOC_Os01g63330	0.991166
TCONS_00081336	LOC_Os07g20620	0.978709
TCONS_00081336	LOC_Os02g38540	0.953408
TCONS_00081336	LOC_Os08g22620	0.988109
TCONS_00081336	LOC_Os08g21230	0.96969
TCONS_00081336	LOC_Os10g12410	0.979555
TCONS_00081336	LOC_Os11g23810	0.983668
TCONS_00081336	LOC_Os09g07970	0.986774
TCONS_00081336	LOC_Os10g37370	0.987163
TCONS_00081336	LOC_Os05g03690	0.996894
TCONS_00081336	LOC_Os08g12950	0.968059
TCONS_00081336	LOC_Os02g22180	0.957406
TCONS_00081336	LOC_Os06g24810	0.96692
TCONS_00081336	LOC_Os12g34170	0.968234
TCONS_00081336	LOC_Os05g28560	0.972155
TCONS_00081336	LOC_Os01g64150	0.965682
TCONS_00081336	LOC_Os02g54400	0.962616
TCONS_00081336	LOC_Os08g11010	0.960609
TCONS_00081336	LOC_Os08g22024	0.968884
TCONS_00081336	LOC_Os10g03460	0.961324
TCONS_00081336	LOC_Os03g49040	0.961964
TCONS_00081336	LOC_Os12g28420	0.95266
TCONS_00081336	LOC_Os01g03580	0.962331
TCONS_00081336	LOC_Os04g48780	0.959945
TCONS_00081336	LOC_Os02g37620	0.994139
TCONS_00081336	LOC_Os01g19920	0.976839
TCONS_00081336	LOC_Os07g34770	0.981004
TCONS_00081336	LOC_Os12g40700	0.963052
TCONS_00081336	LOC_Os04g19950	0.961995
TCONS_00081336	LOC_Os03g15510	0.963669
TCONS_00081336	LOC_Os01g29710	0.98404
TCONS_00081336	LOC_Os11g12060	0.967428
TCONS_00081336	LOC_Os07g24620	0.960118
TCONS_00081336	LOC_Os04g25010	0.953642
TCONS_00081336	LOC_Os10g17980	0.978341
TCONS_00081336	LOC_Os05g10390	0.955265
TCONS_00081336	LOC_Os04g11180	0.989666
TCONS_00081336	LOC_Os10g03020	0.961648
TCONS_00081336	LOC_Os12g34210	0.953553
TCONS_00081336	LOC_Os12g30050	0.984425
TCONS_00081336	LOC_Os06g16890	0.975509
TCONS_00081336	LOC_Os07g38500	0.987271
TCONS_00081336	LOC_Os08g05450	0.951205
TCONS_00081336	LOC_Os04g26300	0.975226
TCONS_00081336	LOC_Os03g33190	0.982685
TCONS_00081336	LOC_Os05g19780	0.990479
TCONS_00081336	LOC_Os02g38280	0.954679
TCONS_00081336	LOC_Os08g26280	0.972202
TCONS_00081336	LOC_Os08g12190	0.989943
TCONS_00081336	LOC_Os12g35140	0.97946
TCONS_00081336	LOC_Os07g18760	0.988942
TCONS_00081336	LOC_Os08g33780	0.974663
TCONS_00081336	LOC_Os10g05650	0.961866
TCONS_00081336	LOC_Os07g33830	0.958093
TCONS_00081336	LOC_Os03g02120	0.950003
TCONS_00081336	LOC_Os04g20310	0.97433
TCONS_00081336	LOC_Os09g20080	0.988572
TCONS_00081336	LOC_Os07g45940	0.968522
TCONS_00081336	LOC_Os12g35150	0.978729
TCONS_00081336	LOC_Os03g15970	0.967763
TCONS_00081336	ChrSy.fgenesh.gene.40	0.98915
TCONS_00081336	LOC_Os07g13390	0.987975
TCONS_00081336	LOC_Os06g10360	0.964055
TCONS_00081336	LOC_Os08g39180	0.952097
TCONS_00081336	LOC_Os08g12560	0.986006
TCONS_00081336	LOC_Os11g15755	0.959
TCONS_00081336	LOC_Os01g29670	0.965493
TCONS_00081336	LOC_Os05g49570	0.962885
TCONS_00081336	LOC_Os07g13060	0.950965
TCONS_00081336	LOC_Os03g41180	0.962478
TCONS_00081336	LOC_Os02g54950	0.991678
TCONS_00081336	LOC_Os08g41260	0.951665
TCONS_00081336	LOC_Os12g28690	0.969453
TCONS_00081336	LOC_Os01g24520	0.977362
TCONS_00081336	LOC_Os06g21068	0.991882
TCONS_00081336	LOC_Os04g38170	0.97515
TCONS_00081336	LOC_Os07g43750	0.951017
TCONS_00081336	LOC_Os03g13680	0.987993
TCONS_00081336	LOC_Os02g25350	0.972255
TCONS_00081336	LOC_Os01g57830	0.971889
TCONS_00081336	LOC_Os09g09880	0.96963
TCONS_00081336	LOC_Os03g37610	0.961601
TCONS_00081336	LOC_Os06g45750	0.957108
TCONS_00081336	LOC_Os11g06500	0.955374
TCONS_00081336	LOC_Os12g11140	0.97848
TCONS_00081336	LOC_Os04g14590	0.967723
TCONS_00081336	LOC_Os04g59390	0.973613
TCONS_00081336	LOC_Os02g53540	0.95451
TCONS_00081336	LOC_Os11g19600	0.950798
TCONS_00081336	LOC_Os09g24090	0.954735
TCONS_00081336	LOC_Os12g35740	0.996118
TCONS_00081336	LOC_Os05g12310	0.994819
TCONS_00081336	LOC_Os06g45530	0.969777
TCONS_00081336	LOC_Os11g17150	0.973634
TCONS_00081336	LOC_Os10g20410	0.95102
TCONS_00081336	LOC_Os07g01500	0.951388
TCONS_00081336	LOC_Os09g03290	0.95002
TCONS_00081336	LOC_Os04g06260	0.964646
TCONS_00081336	LOC_Os01g29280	0.951355
TCONS_00081336	LOC_Os05g43810	0.982915
TCONS_00081336	LOC_Os05g24530	0.976751
TCONS_00081336	LOC_Os04g17630	0.979876
TCONS_00081336	LOC_Os11g02230	0.98003
TCONS_00081336	LOC_Os09g08170	0.95212
TCONS_00081336	LOC_Os08g04250	0.962759
TCONS_00081336	LOC_Os08g10770	0.981807
TCONS_00081336	LOC_Os09g08990	0.95102
TCONS_00081336	LOC_Os02g02010	0.974722
TCONS_00081336	LOC_Os04g05360	0.969312
TCONS_00081336	LOC_Os11g22850	0.959242
TCONS_00081336	LOC_Os06g02850	0.974654
TCONS_00081336	LOC_Os11g22020	0.952861
TCONS_00081336	LOC_Os10g29210	0.960124
TCONS_00081336	LOC_Os06g45740	0.961821
TCONS_00081336	LOC_Os11g06770	0.963734
TCONS_00081336	LOC_Os10g05820	0.979558
TCONS_00081336	LOC_Os04g43450	0.973701
TCONS_00081336	LOC_Os10g22250	0.972253
TCONS_00081336	LOC_Os09g14210	0.982172
TCONS_00081336	LOC_Os04g16880	0.97745
TCONS_00081336	LOC_Os12g08450	0.976949
TCONS_00081336	LOC_Os12g06710	0.974779
TCONS_00081336	LOC_Os11g16710	0.981798
TCONS_00081336	LOC_Os04g08470	0.951802
TCONS_00081336	LOC_Os01g29340	0.979622
TCONS_00081336	LOC_Os05g37750	0.974549
TCONS_00081336	LOC_Os12g23430	0.956191
TCONS_00081336	LOC_Os08g17760	0.956041
TCONS_00081336	LOC_Os08g22750	0.965409
TCONS_00081336	LOC_Os02g33000	0.960285
TCONS_00081336	LOC_Os11g47080	0.955009
TCONS_00081336	LOC_Os05g12210	0.988663
TCONS_00081336	LOC_Os03g38270	0.978281
TCONS_00081336	LOC_Os03g37430	0.974975
TCONS_00081336	LOC_Os04g42950	0.959796
TCONS_00081336	LOC_Os01g38580	0.963133
TCONS_00081336	LOC_Os03g25650	0.967557
TCONS_00081336	LOC_Os04g53760	0.952219
TCONS_00081336	LOC_Os06g22100	0.975685
TCONS_00081336	LOC_Os11g41365	0.964305
TCONS_00081336	LOC_Os08g41620	0.989498
TCONS_00081336	LOC_Os03g14300	0.96835
TCONS_00081336	LOC_Os01g35560	0.969007
TCONS_00081336	LOC_Os10g22240	0.981707
TCONS_00081336	LOC_Os04g20860	0.989347
TCONS_00081336	LOC_Os05g13890	0.977794
TCONS_00081336	LOC_Os09g06210	0.95142
TCONS_00081336	LOC_Os08g36440	0.977358
TCONS_00081336	LOC_Os07g16580	0.981409
TCONS_00081336	LOC_Os06g08100	0.967844
TCONS_00081336	LOC_Os08g08720	0.980889
TCONS_00081336	LOC_Os04g40260	0.958856
TCONS_00081336	LOC_Os01g41670	0.991189
TCONS_00081336	LOC_Os08g39870	0.994625
TCONS_00081336	LOC_Os06g22480	0.976771
TCONS_00081336	LOC_Os07g13350	0.98217
TCONS_00081336	LOC_Os03g43250	0.97433
TCONS_00081336	LOC_Os08g05020	0.969018
TCONS_00081336	LOC_Os09g12020	0.97239
TCONS_00081336	LOC_Os03g56530	0.974808
TCONS_00081336	LOC_Os11g47070	0.975386
TCONS_00081336	LOC_Os10g01770	0.972313
TCONS_00081336	LOC_Os12g12340	0.98623
TCONS_00081336	LOC_Os01g50900	0.956593
TCONS_00081336	LOC_Os09g01130	0.99088
TCONS_00081336	LOC_Os09g37800	0.979382
TCONS_00081336	LOC_Os10g11660	0.958187
TCONS_00081336	LOC_Os05g12150	0.96762
TCONS_00081336	LOC_Os01g31120	0.952009
TCONS_00081336	LOC_Os07g44520	0.991106
TCONS_00081336	LOC_Os09g36700	0.968762
TCONS_00081336	LOC_Os08g28550	0.97615
TCONS_00081336	LOC_Os07g01520	0.972282
TCONS_00081336	LOC_Os12g34720	0.989213
TCONS_00081336	LOC_Os07g22090	0.983324
TCONS_00081336	LOC_Os06g33400	0.980835
TCONS_00081336	LOC_Os09g11750	0.974735
TCONS_00081336	LOC_Os04g18450	0.956344
TCONS_00081336	LOC_Os09g38150	0.987846
TCONS_00081336	LOC_Os05g40330	0.956812
TCONS_00081336	LOC_Os07g28980	0.955439
TCONS_00081336	LOC_Os02g27640	0.964221
TCONS_00081336	LOC_Os05g51310	0.971801
TCONS_00081336	LOC_Os11g18250	0.976302
TCONS_00081336	LOC_Os11g12630	0.974064
TCONS_00081336	LOC_Os03g56710	0.966403
TCONS_00081336	LOC_Os05g32030	0.951044
TCONS_00081336	LOC_Os03g25280	0.974939
TCONS_00081336	LOC_Os11g26300	0.974519
TCONS_00081336	LOC_Os11g08470	0.979382
TCONS_00081336	LOC_Os12g26740	0.989523
TCONS_00081336	LOC_Os03g44980	0.953838
TCONS_00081336	LOC_Os01g38850	0.979382
TCONS_00081336	LOC_Os04g25790	0.999526
TCONS_00081336	LOC_Os09g37920	0.967561
TCONS_00081336	LOC_Os03g12220	0.980932
TCONS_00081336	LOC_Os10g20670	0.950105
TCONS_00081336	LOC_Os06g22020	0.974064
TCONS_00081336	LOC_Os11g47550	0.96747
TCONS_00081336	LOC_Os04g19400	0.974064
TCONS_00081336	LOC_Os05g08300	0.974418
TCONS_00081336	LOC_Os01g39860	0.969294
TCONS_00081336	LOC_Os04g47040	0.980264
TCONS_00081336	LOC_Os02g42110	0.978281
TCONS_00081336	LOC_Os02g14540	0.950738
TCONS_00081336	LOC_Os06g28380	0.952739
TCONS_00081336	LOC_Os05g10980	0.978857
TCONS_00081336	LOC_Os04g05190	0.973834
TCONS_00081336	LOC_Os06g33030	0.983988
TCONS_00081336	LOC_Os01g38880	0.96009
TCONS_00081336	LOC_Os07g20940	0.974333
TCONS_00081336	LOC_Os04g24580	0.97468
TCONS_00081336	LOC_Os12g17100	0.988492
TCONS_00081336	LOC_Os01g42070	0.954458
TCONS_00081336	LOC_Os03g41280	0.990324
TCONS_00081336	LOC_Os04g21030	0.991506
TCONS_00081336	LOC_Os01g61980	0.963551
TCONS_00081336	LOC_Os02g16830	0.968798
TCONS_00081336	LOC_Os08g11680	0.987161
TCONS_00081336	LOC_Os09g03030	0.954374
TCONS_00081336	LOC_Os09g22070	0.96662
TCONS_00081336	LOC_Os05g15320	0.953585
TCONS_00081336	LOC_Os05g22340	0.951802
TCONS_00081336	LOC_Os09g37340	0.974485
TCONS_00081336	LOC_Os03g60670	0.983555
TCONS_00081336	LOC_Os08g27420	0.98161
TCONS_00081336	LOC_Os01g66450	0.968323
TCONS_00081336	LOC_Os11g22930	0.982735
TCONS_00081336	LOC_Os12g32200	0.983344
TCONS_00081336	LOC_Os10g02520	0.952978
TCONS_00081336	LOC_Os06g18940	0.98787
TCONS_00081336	LOC_Os05g49560	0.983345
TCONS_00081336	LOC_Os02g31850	0.97496
TCONS_00081336	LOC_Os10g30020	0.953977
TCONS_00081336	LOC_Os10g21100	0.968693
TCONS_00081336	LOC_Os05g33420	0.968322
TCONS_00081336	LOC_Os03g63060	0.978127
TCONS_00081336	LOC_Os05g48900	0.972628
TCONS_00081336	LOC_Os01g54620	0.986135
TCONS_00081336	LOC_Os11g30670	0.972622
TCONS_00081336	LOC_Os10g36500	0.968322
TCONS_00081336	LOC_Os02g54240	0.979199
TCONS_00081336	LOC_Os06g13890	0.970464
TCONS_00081336	LOC_Os01g18420	0.950301
TCONS_00081336	LOC_Os07g01290	0.954178
TCONS_00081336	LOC_Os01g38058	0.972334
TCONS_00081336	LOC_Os02g44040	0.959946
TCONS_00081336	LOC_Os07g31910	0.953064
TCONS_00081336	LOC_Os07g25330	0.978284
TCONS_00081336	LOC_Os10g20139	0.960495
TCONS_00081336	LOC_Os04g26730	0.954056
TCONS_00081336	LOC_Os10g07040	0.959988
TCONS_00081336	LOC_Os12g33380	0.953828
TCONS_00081336	LOC_Os06g27590	0.952518
TCONS_00081336	LOC_Os04g34970	0.959065
TCONS_00081336	LOC_Os05g20290	0.980536
TCONS_00081336	LOC_Os07g24970	0.968899
TCONS_00081336	LOC_Os06g23080	0.982264
TCONS_00081336	LOC_Os03g31520	0.972236
TCONS_00081336	LOC_Os08g17560	0.989753
TCONS_00081336	LOC_Os06g31200	0.963252
TCONS_00081336	LOC_Os04g21760	0.956514
TCONS_00081336	LOC_Os08g18900	0.959611
TCONS_00081336	LOC_Os05g22560	0.97496
TCONS_00081336	LOC_Os02g25950	0.984981
TCONS_00081336	LOC_Os04g58650	0.955726
TCONS_00081336	LOC_Os02g35570	0.98195
TCONS_00081336	LOC_Os01g21650	0.981521
TCONS_00081336	LOC_Os06g47120	0.982166
TCONS_00081336	LOC_Os06g50280	0.970767
TCONS_00081336	LOC_Os03g62314	0.967777
TCONS_00081336	LOC_Os03g51980	0.954296
TCONS_00081336	LOC_Os08g12910	0.99071
TCONS_00081336	LOC_Os04g27790	0.963093
TCONS_00081336	LOC_Os11g08200	0.968212
TCONS_00081336	LOC_Os03g35480	0.96602
TCONS_00081336	LOC_Os01g60080	0.971201
TCONS_00081336	LOC_Os05g11700	0.960391
TCONS_00081336	LOC_Os05g22580	0.96243
TCONS_00081336	LOC_Os12g28900	0.970181
TCONS_00081336	LOC_Os04g41430	0.971844
TCONS_00081336	LOC_Os11g21900	0.955549
TCONS_00081336	LOC_Os04g08620	0.977088
TCONS_00081336	LOC_Os07g04590	0.973806
TCONS_00081336	LOC_Os01g37170	0.970263
TCONS_00081336	LOC_Os04g38740	0.953465
TCONS_00081336	LOC_Os11g30546	0.976244
TCONS_00081336	LOC_Os03g39680	0.974929
TCONS_00081336	LOC_Os11g45580	0.956366
TCONS_00081336	LOC_Os12g10160	0.967771
TCONS_00081336	LOC_Os05g40140	0.968877
TCONS_00081336	LOC_Os03g17850	0.973581
TCONS_00081336	LOC_Os11g38720	0.960083
TCONS_00081336	LOC_Os01g01520	0.954185
TCONS_00081336	LOC_Os03g58270	0.953714
TCONS_00081336	LOC_Os04g03270	0.979943
TCONS_00081336	LOC_Os05g33180	0.980277
TCONS_00081336	LOC_Os08g28720	0.982776
TCONS_00081336	LOC_Os01g74590	0.979179
TCONS_00081336	LOC_Os04g39310	0.959069
TCONS_00081336	LOC_Os05g44970	0.982745
TCONS_00081336	LOC_Os01g24050	0.976187
TCONS_00081336	LOC_Os04g26570	0.980164
TCONS_00081336	LOC_Os03g02230	0.983724
TCONS_00081336	LOC_Os12g12650	0.971116
TCONS_00081336	LOC_Os10g07614	0.952564
TCONS_00081336	LOC_Os02g14680	0.976097
TCONS_00081336	LOC_Os05g20410	0.969906
TCONS_00081336	LOC_Os03g25300	0.974939
TCONS_00081336	LOC_Os08g02730	0.953219
TCONS_00081336	LOC_Os05g41040	0.958077
TCONS_00081336	LOC_Os04g25880	0.989733
TCONS_00081336	LOC_Os03g25190	0.952875
TCONS_00081336	LOC_Os09g32320	0.976889
TCONS_00081336	LOC_Os01g24240	0.97496
TCONS_00081336	LOC_Os09g15950	0.958375
TCONS_00081336	LOC_Os07g15830	0.975315
TCONS_00081336	LOC_Os04g48590	0.952882
TCONS_00081336	LOC_Os06g19830	0.954295
TCONS_00081336	LOC_Os08g10180	0.988005
TCONS_00081336	LOC_Os06g51210	0.954872
TCONS_00081336	LOC_Os11g25180	0.956915
TCONS_00081336	LOC_Os03g27540	0.965923
TCONS_00081336	LOC_Os01g49870	0.983521
TCONS_00081336	LOC_Os05g10440	0.970956
TCONS_00081336	LOC_Os01g64250	0.974084
TCONS_00081336	LOC_Os08g15310	0.976215
TCONS_00081336	LOC_Os10g42400	0.965613
TCONS_00081336	LOC_Os07g45760	0.985292
TCONS_00081336	LOC_Os01g63680	0.950569
TCONS_00081336	LOC_Os08g40980	0.959944
TCONS_00081336	LOC_Os03g26610	0.9712
TCONS_00081336	LOC_Os03g33700	0.980233
TCONS_00081336	LOC_Os04g35510	0.993503
TCONS_00081336	LOC_Os01g19270	0.960286
TCONS_00081336	LOC_Os05g08540	0.967905
TCONS_00081336	LOC_Os07g21980	0.987031
TCONS_00081336	LOC_Os11g42310	0.956739
TCONS_00081336	LOC_Os03g10800	0.973
TCONS_00081336	LOC_Os02g27350	0.969534
TCONS_00081336	LOC_Os11g40320	0.978805
TCONS_00081336	LOC_Os01g73662	0.970086
TCONS_00081336	LOC_Os09g02040	0.957866
TCONS_00081336	LOC_Os10g28770	0.969674
TCONS_00081336	LOC_Os11g10450	0.991423
TCONS_00081336	LOC_Os11g17240	0.962192
TCONS_00081336	LOC_Os05g28430	0.972673
TCONS_00081336	LOC_Os08g24280	0.970327
TCONS_00081336	LOC_Os02g23827	0.981777
TCONS_00081336	LOC_Os05g32280	0.965232
TCONS_00081336	LOC_Os07g20490	0.979524
TCONS_00081336	LOC_Os05g23980	0.956879
TCONS_00081336	LOC_Os10g04740	0.982902
TCONS_00081336	LOC_Os11g30170	0.97621
TCONS_00081336	LOC_Os10g20020	0.971598
TCONS_00081336	LOC_Os01g60389	0.969536
TCONS_00081336	LOC_Os03g01610	0.982468
TCONS_00081336	LOC_Os03g01650	0.982468
TCONS_00081336	LOC_Os01g27900	0.960844
TCONS_00081336	LOC_Os12g27320	0.9826
TCONS_00081336	LOC_Os10g30826	0.956359
TCONS_00081336	LOC_Os08g08940	0.978302
TCONS_00081336	LOC_Os04g25454	0.967552
TCONS_00081336	LOC_Os12g07620	0.981091
TCONS_00081336	LOC_Os06g17340	0.950265
TCONS_00081336	LOC_Os07g16490	0.974518
TCONS_00081336	LOC_Os07g36970	0.999103
TCONS_00081336	LOC_Os10g17350	0.987335
TCONS_00081336	LOC_Os02g45730	0.956687
TCONS_00081336	LOC_Os04g27270	0.998074
TCONS_00081336	LOC_Os11g46840	0.98095
TCONS_00081336	LOC_Os10g08360	0.964058
TCONS_00081336	LOC_Os02g29850	0.971464
TCONS_00081336	LOC_Os04g58290	0.998337
TCONS_00081336	LOC_Os06g25310	0.977145
TCONS_00081336	LOC_Os12g37000	0.993492
TCONS_00081336	LOC_Os05g43870	0.96215
TCONS_00081336	LOC_Os11g07911	0.994772
TCONS_00081336	LOC_Os06g36440	0.964544
TCONS_00081336	LOC_Os09g37990	0.973757
TCONS_00081336	LOC_Os10g33050	0.995371
TCONS_00081336	LOC_Os11g27650	0.9734
TCONS_00081336	LOC_Os04g21530	0.997153
TCONS_00081336	LOC_Os08g26740	0.959099
TCONS_00081336	LOC_Os08g35350	0.977253
TCONS_00081336	LOC_Os06g17000	0.975701
TCONS_00081336	LOC_Os11g25940	0.958096
TCONS_00081336	LOC_Os01g71860	0.955958
TCONS_00081336	LOC_Os06g03720	0.950052
TCONS_00081336	LOC_Os02g26230	0.995893
TCONS_00081336	LOC_Os11g10970	0.968139
TCONS_00081336	LOC_Os01g27834	0.99903
TCONS_00081336	LOC_Os04g07460	0.951636
TCONS_00081336	LOC_Os05g45170	0.959099
TCONS_00081336	LOC_Os08g20250	0.994403
TCONS_00081336	LOC_Os03g59010	0.969237
TCONS_00081336	LOC_Os08g40380	0.965711
TCONS_00081336	LOC_Os07g32150	0.954789
TCONS_00081336	LOC_Os10g40510	0.955505
TCONS_00081336	LOC_Os05g18419	0.986233
TCONS_00081336	LOC_Os03g31260	0.961082
TCONS_00081336	LOC_Os04g52920	0.969383
TCONS_00081336	LOC_Os01g56840	0.978273
TCONS_00081336	LOC_Os08g41570	0.954163
TCONS_00081336	LOC_Os03g32920	0.968977
TCONS_00081336	LOC_Os08g13120	0.996616
TCONS_00081336	LOC_Os08g24660	0.996734
TCONS_00081336	LOC_Os05g36280	0.998143
TCONS_00081336	LOC_Os10g12226	0.978681
TCONS_00081336	LOC_Os02g30960	0.998337
TCONS_00081336	LOC_Os07g42550	0.958927
TCONS_00081336	LOC_Os04g16660	0.953717
TCONS_00081336	LOC_Os01g16440	0.9534
TCONS_00081336	LOC_Os11g35510	0.964224
TCONS_00081336	LOC_Os11g28150	0.987597
TCONS_00081336	LOC_Os08g01540	0.956114
TCONS_00081336	LOC_Os12g17190	0.976721
TCONS_00081336	LOC_Os06g17570	0.976396
TCONS_00081336	LOC_Os11g26330	0.952528
TCONS_00081336	LOC_Os01g23144	0.969903
TCONS_00081336	LOC_Os05g25740	0.965711
TCONS_00081336	LOC_Os03g26760	0.959323
TCONS_00081336	LOC_Os11g40490	0.956462
TCONS_00081336	LOC_Os03g05490	0.957999
TCONS_00081336	LOC_Os04g38860	0.972313
TCONS_00081336	LOC_Os08g23800	0.96174
TCONS_00081336	LOC_Os06g19330	0.976922
TCONS_00081336	LOC_Os01g32530	0.999926
TCONS_00081336	LOC_Os11g01118	0.977292
TCONS_00081336	LOC_Os08g12940	0.971464
TCONS_00081336	LOC_Os12g09380	0.950738
TCONS_00081336	LOC_Os11g38190	0.970954
TCONS_00081336	LOC_Os10g01520	0.985409
TCONS_00081336	LOC_Os10g38670	0.959099
TCONS_00081336	LOC_Os07g45060	0.977651
TCONS_00081336	LOC_Os09g03080	0.96435
TCONS_00081336	LOC_Os04g28580	0.954163
TCONS_00081336	LOC_Os09g14270	0.959099
TCONS_00081336	LOC_Os02g17790	0.995356
TCONS_00081336	LOC_Os07g29400	0.957546
TCONS_00081336	LOC_Os02g12630	0.988956
TCONS_00081336	LOC_Os08g04320	0.981983
TCONS_00081336	LOC_Os02g15190	0.965711
TCONS_00081336	LOC_Os11g06730	0.957881
TCONS_00081336	LOC_Os10g11480	0.99694
TCONS_00081336	LOC_Os08g05230	0.97811
TCONS_00081336	LOC_Os02g01160	0.959163
TCONS_00081336	LOC_Os05g24990	0.974838
TCONS_00081336	LOC_Os01g19620	0.952687
TCONS_00081336	LOC_Os08g23500	0.955274
TCONS_00081336	LOC_Os08g35830	0.995442
TCONS_00081336	LOC_Os02g16210	0.973986
TCONS_00081336	LOC_Os03g44370	0.982604
TCONS_00081336	LOC_Os09g23948	0.96215
TCONS_00081336	LOC_Os12g22440	0.961542
TCONS_00081336	LOC_Os04g07440	0.963572
TCONS_00081336	LOC_Os04g12150	0.96215
TCONS_00081336	LOC_Os07g34550	0.985153
TCONS_00081336	LOC_Os10g08022	0.99694
TCONS_00081336	LOC_Os10g24300	0.955661
TCONS_00081336	LOC_Os02g27540	0.998641
TCONS_00081336	LOC_Os05g40360	0.965792
TCONS_00081336	LOC_Os07g39460	0.98431
TCONS_00081336	LOC_Os11g31210	0.960821
TCONS_00081336	LOC_Os03g42410	0.961082
TCONS_00081336	LOC_Os03g15400	0.965711
TCONS_00081336	LOC_Os04g18040	0.996347
TCONS_00081336	LOC_Os05g23330	0.950342
TCONS_00081336	LOC_Os04g38650	0.966839
TCONS_00081336	LOC_Os09g25800	0.961502
TCONS_00081336	LOC_Os11g42550	0.997808
TCONS_00081336	LOC_Os04g18400	0.975079
TCONS_00081336	LOC_Os05g23110	0.958186
TCONS_00081336	LOC_Os02g37190	0.960786
TCONS_00081336	LOC_Os12g22310	0.960265
TCONS_00081336	LOC_Os09g04100	0.950037
TCONS_00081336	LOC_Os10g40190	0.977357
TCONS_00081336	LOC_Os03g41662	0.99793
TCONS_00081336	LOC_Os05g08160	0.994573
TCONS_00081336	LOC_Os12g40200	0.995777
TCONS_00081336	LOC_Os07g04620	0.997263
TCONS_00081336	LOC_Os11g10960	0.963767
TCONS_00081336	LOC_Os08g13500	0.984255
TCONS_00081336	LOC_Os12g03210	0.962845
TCONS_00081336	LOC_Os01g73810	0.996734
TCONS_00081336	LOC_Os08g39250	0.978986
TCONS_00081336	LOC_Os02g34640	0.955274
TCONS_00081336	LOC_Os01g14550	0.977173
TCONS_00081336	LOC_Os06g25720	0.9757
TCONS_00081336	LOC_Os04g40240	0.992206
TCONS_00081336	LOC_Os07g34460	0.979306
TCONS_00081336	LOC_Os02g46010	0.986156
TCONS_00081336	LOC_Os02g36500	0.975833
TCONS_00081336	LOC_Os09g09730	0.969007
TCONS_00081336	LOC_Os12g05590	0.997675
TCONS_00081336	LOC_Os04g29360	0.959959
TCONS_00081336	LOC_Os07g25920	0.961685
TCONS_00081336	LOC_Os01g40920	0.997605
TCONS_00081336	LOC_Os09g24880	0.997842
TCONS_00081336	LOC_Os05g28820	0.998281
TCONS_00081336	LOC_Os12g11090	0.955661
TCONS_00081336	LOC_Os02g25330	0.994928
TCONS_00081336	LOC_Os06g37680	0.954163
TCONS_00081336	LOC_Os06g41330	0.956737
TCONS_00081336	LOC_Os06g34260	0.999146
TCONS_00081336	LOC_Os03g38689	0.960265
TCONS_00081336	LOC_Os02g10870	0.99789
TCONS_00081336	LOC_Os06g18920	0.998596
TCONS_00081336	LOC_Os09g03970	0.956462
TCONS_00081336	LOC_Os07g17520	0.978414
TCONS_00081336	LOC_Os11g12130	0.986616
TCONS_00081336	LOC_Os08g11350	0.998079
TCONS_00081336	LOC_Os02g16850	0.995893
TCONS_00081336	LOC_Os04g06630	0.977526
TCONS_00081336	LOC_Os10g39980	0.999063
TCONS_00081336	LOC_Os06g38490	0.990651
TCONS_00081336	LOC_Os05g16590	0.962818
TCONS_00081336	LOC_Os05g19690	0.977765
TCONS_00081336	LOC_Os03g48980	0.959099
TCONS_00081336	LOC_Os09g27470	0.998183
TCONS_00081336	LOC_Os03g02370	0.987085
TCONS_00081336	LOC_Os11g34480	0.977618
TCONS_00081336	LOC_Os03g32900	0.960442
TCONS_00081336	LOC_Os06g37500	0.997462
TCONS_00081336	LOC_Os06g08930	0.999803
TCONS_00081336	LOC_Os02g15290	0.981146
TCONS_00081336	LOC_Os01g36510	0.995582
TCONS_00081336	LOC_Os07g48440	0.963275
TCONS_00081336	LOC_Os10g13590	0.959925
TCONS_00081336	LOC_Os01g67990	0.993753
TCONS_00081336	LOC_Os10g22610	0.977086
TCONS_00081336	LOC_Os01g44130	0.999911
TCONS_00081336	LOC_Os07g45990	0.977825
TCONS_00081336	LOC_Os04g28450	0.956462
TCONS_00081336	LOC_Os11g17980	0.957734
TCONS_00081336	LOC_Os03g44460	0.976776
TCONS_00081336	LOC_Os06g24370	0.977044
TCONS_00081336	LOC_Os05g29770	0.962818
TCONS_00081336	LOC_Os02g26070	0.995356
TCONS_00081336	LOC_Os11g04274	0.960265
TCONS_00081336	LOC_Os11g44570	0.960567
TCONS_00081336	LOC_Os08g36660	0.994942
TCONS_00081336	LOC_Os07g01650	0.998464
TCONS_00081336	LOC_Os12g18910	0.978983
TCONS_00081336	LOC_Os02g47250	0.993944
TCONS_00081336	LOC_Os01g42100	0.960567
TCONS_00081336	LOC_Os03g34210	0.971241
TCONS_00081336	LOC_Os11g35350	0.999288
TCONS_00081336	LOC_Os11g35762	0.952094
TCONS_00081336	LOC_Os03g36070	0.99789
TCONS_00081336	LOC_Os12g09020	0.965711
TCONS_00081336	LOC_Os11g24440	0.956816
TCONS_00081336	LOC_Os08g17510	0.961082
TCONS_00081336	LOC_Os05g25075	0.974348
TCONS_00081336	LOC_Os07g17440	0.95131
TCONS_00081336	LOC_Os03g50180	0.959099
TCONS_00081336	LOC_Os05g03884	0.963275
TCONS_00081336	LOC_Os08g29450	0.959099
TCONS_00081336	LOC_Os11g12480	0.977452
TCONS_00081336	LOC_Os12g30310	0.962494
TCONS_00081336	LOC_Os04g12800	0.957881
TCONS_00081336	LOC_Os11g28820	0.978934
TCONS_00081336	LOC_Os02g20220	0.997605
TCONS_00081336	LOC_Os11g29170	0.961783
TCONS_00081336	LOC_Os01g51590	0.996347
TCONS_00081336	LOC_Os04g50670	0.961082
TCONS_00081336	LOC_Os06g47020	0.960066
TCONS_00081336	LOC_Os03g25330	0.999155
TCONS_00081336	LOC_Os06g35660	0.997263
TCONS_00081336	LOC_Os01g53840	0.997605
TCONS_00081336	LOC_Os12g40930	0.968427
TCONS_00081336	LOC_Os05g19890	0.990202
TCONS_00081336	LOC_Os06g03280	0.969387
TCONS_00081336	LOC_Os06g28170	0.998797
TCONS_00081336	LOC_Os01g50140	0.959925
TCONS_00081336	LOC_Os08g38170	0.952158
TCONS_00081336	LOC_Os11g36310	0.997407
TCONS_00081336	LOC_Os02g27780	0.952626
TCONS_00081336	LOC_Os11g22190	0.959099
TCONS_00081336	LOC_Os01g65120	0.95596
TCONS_00081336	LOC_Os02g25070	0.996785
TCONS_00081336	LOC_Os09g22400	0.975699
TCONS_00081336	LOC_Os04g11410	0.984241
TCONS_00081336	LOC_Os02g01580	0.96031
TCONS_00081336	LOC_Os12g25390	0.978119
TCONS_00081336	LOC_Os02g24060	0.96386
TCONS_00081336	LOC_Os07g47160	0.996347
TCONS_00081336	LOC_Os04g19820	0.994403
TCONS_00081336	LOC_Os02g20830	0.964218
TCONS_00081336	LOC_Os10g40620	0.971473
TCONS_00081336	LOC_Os04g04870	0.958066
TCONS_00081336	LOC_Os01g07640	0.997263
TCONS_00081336	LOC_Os04g43890	0.962139
TCONS_00081336	LOC_Os04g06230	0.992147
TCONS_00081336	LOC_Os01g10770	0.977452
TCONS_00081336	LOC_Os04g02220	0.965711
TCONS_00081336	LOC_Os04g20370	0.990753
TCONS_00081336	LOC_Os07g18200	0.967305
TCONS_00081336	LOC_Os08g15306	0.991775
TCONS_00081336	LOC_Os02g20350	0.995524
TCONS_00081336	LOC_Os01g55710	0.977452
TCONS_00081336	LOC_Os10g26450	0.998777
TCONS_00081336	LOC_Os05g41470	0.9573
TCONS_00081336	LOC_Os05g28930	0.961082
TCONS_00081336	LOC_Os07g14950	0.99685
TCONS_00081336	LOC_Os01g36050	0.95914
TCONS_00081336	LOC_Os02g51730	0.965711
TCONS_00081336	LOC_Os10g21962	0.959967
TCONS_00081336	LOC_Os05g23230	0.999984
TCONS_00081336	LOC_Os02g54540	0.997316
TCONS_00081336	ChrSy.fgenesh.gene.53	0.9739
TCONS_00081336	LOC_Os01g18180	0.987417
TCONS_00081336	LOC_Os01g43690	0.956462
TCONS_00081336	LOC_Os08g26350	0.984209
TCONS_00081336	LOC_Os10g37450	0.978521
TCONS_00081336	LOC_Os02g27680	0.978503
TCONS_00081336	LOC_Os02g26260	0.996957
TCONS_00081336	LOC_Os06g35100	0.976991
TCONS_00081336	LOC_Os03g36020	0.959973
TCONS_00081336	LOC_Os01g19030	0.990909
TCONS_00081336	LOC_Os01g53650	0.9662
TCONS_00081336	LOC_Os03g49680	0.967995
TCONS_00081336	LOC_Os08g21390	0.965711
TCONS_00081336	LOC_Os07g20230	0.978668
TCONS_00081336	LOC_Os03g51890	0.997498
TCONS_00081336	LOC_Os04g56380	0.972313
TCONS_00081336	LOC_Os08g26770	0.96215
TCONS_00081336	LOC_Os12g10420	0.959959
TCONS_00081336	LOC_Os02g43410	0.961082
TCONS_00081336	LOC_Os10g32290	0.996634
TCONS_00081336	LOC_Os04g45450	0.960567
TCONS_00081336	LOC_Os07g35030	0.998195
TCONS_00081336	LOC_Os07g45930	0.997019
TCONS_00081336	LOC_Os08g32600	0.95914
TCONS_00081336	LOC_Os06g38100	0.996997
TCONS_00081336	LOC_Os04g27280	0.95982
TCONS_00081336	LOC_Os03g36480	0.984407
TCONS_00081336	LOC_Os12g25680	0.995724
TCONS_00081336	LOC_Os04g24790	0.99296
TCONS_00081336	LOC_Os06g27910	0.967255
TCONS_00081336	LOC_Os04g44780	0.971787
TCONS_00081336	LOC_Os11g18480	0.972279
TCONS_00081336	LOC_Os06g36580	0.955439
TCONS_00081336	LOC_Os12g31910	0.976491
TCONS_00081336	LOC_Os03g04640	0.969903
TCONS_00081336	LOC_Os11g15220	0.99694
TCONS_00081336	LOC_Os10g41838	0.960066
TCONS_00081336	LOC_Os02g10530	0.995185
TCONS_00081336	LOC_Os03g33970	0.960066
TCONS_00081336	LOC_Os12g03660	0.988531
TCONS_00081336	LOC_Os11g28250	0.969389
TCONS_00081336	LOC_Os11g12420	0.997263
TCONS_00081336	LOC_Os10g34140	0.971532
TCONS_00081336	LOC_Os05g48580	0.99694
TCONS_00081336	LOC_Os02g20030	0.998163
TCONS_00081336	LOC_Os11g14830	0.96451
TCONS_00081336	LOC_Os06g49910	0.993019
TCONS_00081336	LOC_Os09g15310	0.997122
TCONS_00081336	LOC_Os06g44310	0.966562
TCONS_00081336	LOC_Os12g39900	0.992865
TCONS_00081336	LOC_Os06g37470	0.967783
TCONS_00081336	LOC_Os08g24320	0.998337
TCONS_00081336	LOC_Os07g30460	0.992801
TCONS_00081336	LOC_Os01g36680	0.99937
TCONS_00081336	LOC_Os08g27400	0.981564
TCONS_00081336	LOC_Os09g13970	0.963066
TCONS_00081336	LOC_Os04g01730	0.952318
TCONS_00081336	LOC_Os12g13770	0.969945
TCONS_00081336	LOC_Os10g40680	0.976396
TCONS_00081336	LOC_Os10g25640	0.95696
TCONS_00081336	LOC_Os04g57070	0.969903
TCONS_00081336	LOC_Os02g38110	0.998694
TCONS_00081336	LOC_Os08g35030	0.993262
TCONS_00081336	LOC_Os10g01860	0.965061
TCONS_00081336	LOC_Os09g23899	0.96215
TCONS_00081336	LOC_Os06g47460	0.99685
TCONS_00081336	LOC_Os06g28150	0.998123
TCONS_00081336	LOC_Os01g67350	0.978983
TCONS_00081336	LOC_Os10g03420	0.975353
TCONS_00081336	LOC_Os11g32630	0.978342
TCONS_00081336	LOC_Os05g49440	0.962404
TCONS_00081336	LOC_Os04g24390	0.971464
TCONS_00081336	LOC_Os01g46640	0.996785
TCONS_00081336	LOC_Os12g31110	0.965711
TCONS_00081336	LOC_Os02g04060	0.962705
TCONS_00081336	LOC_Os07g49220	0.977452
TCONS_00081336	LOC_Os05g33990	0.985804
TCONS_00081336	LOC_Os06g11590	0.997122
TCONS_00081336	LOC_Os11g31860	0.979241
TCONS_00081336	LOC_Os03g60010	0.977662
TCONS_00081336	LOC_Os05g41300	0.96772
TCONS_00081336	LOC_Os07g17100	0.982014
TCONS_00081336	LOC_Os01g16840	0.965711
TCONS_00081336	LOC_Os12g44090	0.954163
TCONS_00081336	LOC_Os06g41670	0.995731
TCONS_00081336	LOC_Os12g09780	0.962818
TCONS_00081336	LOC_Os06g41380	0.980801
TCONS_00081336	LOC_Os04g14280	0.969023
TCONS_00081336	LOC_Os05g25690	0.970114
TCONS_00081336	LOC_Os06g19840	0.962818
TCONS_00081336	LOC_Os01g23670	0.95696
TCONS_00081336	LOC_Os01g39850	0.963542
TCONS_00081336	LOC_Os01g61530	0.998268
TCONS_00081336	LOC_Os08g16340	0.999894
TCONS_00081336	LOC_Os01g37340	0.970836
TCONS_00081336	LOC_Os07g01420	0.972279
TCONS_00081336	LOC_Os08g24010	0.957546
TCONS_00081336	LOC_Os06g37840	0.96215
TCONS_00081336	LOC_Os05g16970	0.982047
TCONS_00081336	LOC_Os12g36250	0.954163
TCONS_00081336	LOC_Os01g51690	0.96487
TCONS_00081336	LOC_Os01g71530	0.965543
TCONS_00081336	LOC_Os09g11980	0.998123
TCONS_00081336	LOC_Os10g25930	0.96215
TCONS_00081336	LOC_Os12g26770	0.982773
TCONS_00081336	LOC_Os04g29180	0.969903
TCONS_00081336	LOC_Os09g03440	0.955426
TCONS_00081336	LOC_Os06g08620	0.956462
TCONS_00081336	LOC_Os01g71130	0.96386
TCONS_00081336	LOC_Os04g16160	0.995582
TCONS_00081336	LOC_Os02g50380	0.979685
TCONS_00081336	LOC_Os02g15510	0.995582
TCONS_00081336	LOC_Os05g19580	0.965061
TCONS_00081336	LOC_Os08g42250	0.974429
TCONS_00081336	LOC_Os06g14850	0.952615
TCONS_00081336	LOC_Os05g26710	0.960941
TCONS_00081336	LOC_Os07g17740	0.99733
TCONS_00081336	LOC_Os03g20990	0.959099
TCONS_00081336	LOC_Os04g13340	0.968427
TCONS_00081336	LOC_Os04g05490	0.960907
TCONS_00081336	LOC_Os09g09030	0.97263
TCONS_00081336	LOC_Os07g09270	0.960567
TCONS_00081336	LOC_Os05g19520	0.983834
TCONS_00081336	LOC_Os07g18300	0.973749
TCONS_00081336	LOC_Os06g39840	0.955423
TCONS_00081336	LOC_Os09g23966	0.96215
TCONS_00081336	LOC_Os04g39760	0.95914
TCONS_00081336	LOC_Os05g28140	0.978668
TCONS_00081336	LOC_Os07g07600	0.991841
TCONS_00081336	LOC_Os01g45740	0.97244
TCONS_00081336	LOC_Os11g19060	0.998814
TCONS_00081336	LOC_Os08g38630	0.954599
TCONS_00081336	LOC_Os04g51860	0.952012
TCONS_00081336	LOC_Os09g11180	0.998195
TCONS_00081336	LOC_Os03g18390	0.959099
TCONS_00081336	LOC_Os03g18520	0.999063
TCONS_00081336	LOC_Os03g38610	0.987125
TCONS_00081336	LOC_Os02g54750	0.959099
TCONS_00081336	LOC_Os01g31080	0.980222
TCONS_00081336	LOC_Os03g36110	0.964894
TCONS_00081336	LOC_Os01g42690	0.975514
TCONS_00081336	LOC_Os03g59300	0.968788
TCONS_00081336	LOC_Os09g06520	0.966695
TCONS_00081336	LOC_Os02g26014	0.997605
TCONS_00081336	LOC_Os12g38470	0.979199
TCONS_00081336	LOC_Os04g48170	0.969903
TCONS_00081336	LOC_Os12g32530	0.954599
TCONS_00081336	LOC_Os11g27620	0.960567
TCONS_00081336	LOC_Os02g50580	0.961082
TCONS_00081336	LOC_Os12g37150	0.974868
TCONS_00081336	LOC_Os04g17300	0.954236
TCONS_00081336	LOC_Os04g19870	0.995822
TCONS_00081336	LOC_Os05g34620	0.978681
TCONS_00081336	LOC_Os08g06960	0.986126
TCONS_00081336	LOC_Os07g02290	0.991614
TCONS_00081336	LOC_Os03g30660	0.99599
TCONS_00081336	LOC_Os06g31750	0.970318
TCONS_00081336	LOC_Os04g49810	0.956889
TCONS_00081336	LOC_Os05g33470	0.981245
TCONS_00081336	LOC_Os04g04300	0.957999
TCONS_00081336	LOC_Os09g27190	0.965711
TCONS_00081336	LOC_Os02g19250	0.974198
TCONS_00081336	LOC_Os01g28400	0.963275
TCONS_00081336	LOC_Os04g55070	0.995185
TCONS_00081336	LOC_Os11g01320	0.950359
TCONS_00081336	LOC_Os01g16860	0.959099
TCONS_00081336	LOC_Os01g31760	0.994573
TCONS_00081336	LOC_Os12g07440	0.955013
TCONS_00081336	LOC_Os04g32440	0.994942
TCONS_00081336	LOC_Os01g49450	0.999946
TCONS_00081336	LOC_Os04g29830	0.991841
TCONS_00081336	LOC_Os11g23070	0.996347
TCONS_00081336	LOC_Os05g19060	0.99733
TCONS_00081336	LOC_Os02g51540	0.967447
TCONS_00081336	LOC_Os03g25240	0.997067
TCONS_00081336	LOC_Os11g23130	0.999351
TCONS_00081336	LOC_Os05g27430	0.966239
TCONS_00081336	LOC_Os09g06190	0.951405
TCONS_00081336	LOC_Os12g05270	0.9573
TCONS_00081336	LOC_Os02g29580	0.954789
TCONS_00081336	LOC_Os02g43380	0.999288
TCONS_00081336	LOC_Os11g28140	0.999102
TCONS_00081336	LOC_Os05g08510	0.955274
TCONS_00081336	LOC_Os11g08770	0.984233
TCONS_00081336	LOC_Os01g06310	0.973367
TCONS_00081336	LOC_Os08g13740	0.997153
TCONS_00081336	LOC_Os07g39420	0.962018
TCONS_00081336	LOC_Os03g30680	0.977981
TCONS_00081336	LOC_Os12g20370	0.991134
TCONS_00081336	LOC_Os02g39240	0.967305
TCONS_00081336	LOC_Os07g29060	0.997605
TCONS_00081336	LOC_Os08g38190	0.95127
TCONS_00081336	LOC_Os07g28740	0.974868
TCONS_00081336	LOC_Os08g35340	0.953692
TCONS_00081336	LOC_Os01g62640	0.959099
TCONS_00081336	LOC_Os08g20590	0.988531
TCONS_00081336	LOC_Os05g02030	0.997067
TCONS_00081336	LOC_Os01g20870	0.965077
TCONS_00081336	LOC_Os02g50500	0.997537
TCONS_00081336	LOC_Os05g06240	0.995356
TCONS_00081336	LOC_Os06g20290	0.965711
TCONS_00081336	LOC_Os01g33390	0.997153
TCONS_00081336	LOC_Os11g11480	0.997541
TCONS_00081336	LOC_Os04g49280	0.96215
TCONS_00081336	LOC_Os03g25890	0.996594
TCONS_00081336	LOC_Os07g41110	0.998123
TCONS_00081336	LOC_Os09g21990	0.99685
TCONS_00081336	LOC_Os08g20130	0.996347
TCONS_00081336	LOC_Os11g15360	0.97417
TCONS_00081336	LOC_Os11g35540	0.956652
TCONS_00081336	LOC_Os02g51799	0.964218
TCONS_00081336	LOC_Os10g38834	0.965711
TCONS_00081336	LOC_Os04g24090	0.955439
TCONS_00081336	LOC_Os03g31920	0.978101
TCONS_00081336	LOC_Os10g31660	0.961082
TCONS_00081336	LOC_Os09g20330	0.982287
TCONS_00081336	LOC_Os06g15890	0.956901
TCONS_00081336	LOC_Os11g32350	0.958178
TCONS_00081336	LOC_Os02g27820	0.969903
TCONS_00081336	LOC_Os09g17040	0.975206
TCONS_00081336	LOC_Os02g26820	0.956737
TCONS_00081336	LOC_Os07g45770	0.997407
TCONS_00081336	LOC_Os03g31546	0.964218
TCONS_00081336	LOC_Os10g12120	0.965711
TCONS_00081336	LOC_Os09g30280	0.965516
TCONS_00081336	LOC_Os10g37970	0.963275
TCONS_00081336	LOC_Os01g68210	0.975353
TCONS_00081336	LOC_Os06g36520	0.974868
TCONS_00081336	LOC_Os04g32570	0.959099
TCONS_00081336	LOC_Os07g22260	0.991705
TCONS_00081336	LOC_Os06g45790	0.959099
TCONS_00081336	LOC_Os04g54270	0.981522
TCONS_00081336	LOC_Os10g16840	0.970829
TCONS_00081336	LOC_Os06g07914	0.961082
TCONS_00081336	LOC_Os04g43610	0.99128
TCONS_00081336	LOC_Os06g21090	0.960265
TCONS_00081336	LOC_Os08g08600	0.974387
TCONS_00081336	LOC_Os09g20190	0.959099
TCONS_00081336	LOC_Os04g20540	0.96215
TCONS_00081336	LOC_Os09g39250	0.993944
TCONS_00081336	LOC_Os12g18280	0.963163
TCONS_00081336	LOC_Os10g06980	0.963275
TCONS_00081336	LOC_Os01g42060	0.954163
TCONS_00081336	LOC_Os11g23120	0.959099
TCONS_00081336	LOC_Os01g32670	0.952688
TCONS_00081336	LOC_Os08g25230	0.960265
TCONS_00081336	LOC_Os05g13690	0.950738
TCONS_00081336	LOC_Os12g15090	0.959099
TCONS_00081336	LOC_Os01g61950	0.964635
TCONS_00081336	LOC_Os06g44940	0.997019
TCONS_00081336	LOC_Os08g30200	0.970008
TCONS_00081336	LOC_Os02g54800	0.957546
TCONS_00081336	LOC_Os11g41950	0.959576
TCONS_00081336	LOC_Os02g12720	0.978119
TCONS_00081336	LOC_Os01g24140	0.953177
TCONS_00081336	LOC_Os02g50120	0.991878
TCONS_00081336	LOC_Os05g05850	0.960786
TCONS_00081336	LOC_Os10g02210	0.974868
TCONS_00081336	LOC_Os04g08836	0.997842
TCONS_00081336	LOC_Os04g13100	0.982405
TCONS_00081336	LOC_Os06g31900	0.971329
TCONS_00081336	LOC_Os09g03340	0.984975
TCONS_00081336	LOC_Os11g35480	0.956646
TCONS_00081336	LOC_Os06g28430	0.996677
TCONS_00081336	LOC_Os01g06650	0.997263
TCONS_00081336	LOC_Os02g03210	0.977452
TCONS_00081336	LOC_Os11g26140	0.974868
TCONS_00081336	LOC_Os06g16860	0.994669
TCONS_00081336	LOC_Os10g07030	0.96386
TCONS_00081336	LOC_Os05g50580	0.963292
TCONS_00081336	LOC_Os11g32140	0.996785
TCONS_00081336	LOC_Os02g40800	0.980148
TCONS_00081336	LOC_Os12g22170	0.991918
TCONS_00081336	LOC_Os03g32380	0.955701
TCONS_00081336	LOC_Os04g36000	0.965711
TCONS_00081336	LOC_Os06g25290	0.997782
TCONS_00081336	LOC_Os09g11130	0.956607
TCONS_00081336	LOC_Os05g07060	0.997153
TCONS_00081336	LOC_Os02g02080	0.97982
TCONS_00081336	LOC_Os04g12040	0.954866
TCONS_00081336	LOC_Os07g38130	0.974857
TCONS_00081336	LOC_Os06g42920	0.959099
TCONS_00081336	LOC_Os02g15500	0.962697
TCONS_00081336	LOC_Os04g03930	0.96215
TCONS_00081336	LOC_Os01g60560	0.955242
TCONS_00081336	LOC_Os03g13310	0.960567
TCONS_00081336	LOC_Os06g41760	0.964767
TCONS_00081336	LOC_Os12g10260	0.959652
TCONS_00081336	LOC_Os07g20830	0.997605
TCONS_00081336	LOC_Os05g39580	0.962818
TCONS_00081336	LOC_Os04g09510	0.964461
TCONS_00081336	LOC_Os08g30620	0.955147
TCONS_00081336	LOC_Os11g40480	0.960567
TCONS_00081336	LOC_Os04g03230	0.997153
TCONS_00081336	LOC_Os02g56700	0.997407
TCONS_00081336	LOC_Os11g47452	0.978983
TCONS_00081336	LOC_Os11g09720	0.960136
TCONS_00081336	LOC_Os04g19330	0.995893
TCONS_00081336	LOC_Os09g36160	0.963275
TCONS_00081336	LOC_Os04g02210	0.996347
TCONS_00081336	LOC_Os10g23250	0.997354
TCONS_00081336	LOC_Os07g12450	0.996977
TCONS_00081336	LOC_Os01g46540	0.985158
TCONS_00081336	LOC_Os02g14350	0.970551
TCONS_00081336	LOC_Os01g50780	0.955858
TCONS_00081336	LOC_Os10g11740	0.959099
TCONS_00081336	LOC_Os07g28750	0.975699
TCONS_00081336	LOC_Os01g05330	0.997605
TCONS_00081336	LOC_Os01g60710	0.979095
TCONS_00081336	LOC_Os02g26180	0.980666
TCONS_00081336	LOC_Os03g23180	0.96772
TCONS_00081336	LOC_Os04g26070	0.960772
TCONS_00081336	LOC_Os09g02550	0.997659
TCONS_00081336	LOC_Os06g20840	0.99789
TCONS_00081336	LOC_Os01g38410	0.968382
TCONS_00081336	LOC_Os04g05760	0.971464
TCONS_00081336	LOC_Os08g17860	0.998887
TCONS_00081336	LOC_Os05g34700	0.978273
TCONS_00081336	LOC_Os07g46550	0.961082
TCONS_00081336	LOC_Os02g20510	0.959099
TCONS_00081336	LOC_Os02g25050	0.985182
TCONS_00081336	LOC_Os01g31650	0.960278
TCONS_00081336	LOC_Os10g30680	0.966417
TCONS_00081336	LOC_Os05g28490	0.984873
TCONS_00081336	LOC_Os09g16680	0.985933
TCONS_00081336	LOC_Os07g20430	0.963622
TCONS_00081336	LOC_Os11g34100	0.997067
TCONS_00081336	LOC_Os09g36260	0.9978
TCONS_00081336	LOC_Os11g25830	0.965711
TCONS_00081336	LOC_Os08g16970	0.96215
TCONS_00081336	LOC_Os02g26870	0.959099
TCONS_00081336	LOC_Os11g14360	0.996612
TCONS_00081336	LOC_Os10g16430	0.961082
TCONS_00081336	LOC_Os03g35894	0.997134
TCONS_00081336	LOC_Os04g17574	0.978979
TCONS_00081336	LOC_Os08g21190	0.963607
TCONS_00081336	LOC_Os09g39890	0.998678
TCONS_00081336	LOC_Os09g23908	0.96215
TCONS_00081336	LOC_Os12g07610	0.971464
TCONS_00081336	LOC_Os12g30690	0.974347
TCONS_00081336	LOC_Os01g64610	0.992644
TCONS_00081336	LOC_Os01g61960	0.963699
TCONS_00081336	LOC_Os03g04330	0.997666
TCONS_00081336	LOC_Os07g22610	0.998123
TCONS_00081336	LOC_Os11g02290	0.960067
TCONS_00081336	LOC_Os11g17090	0.96386
TCONS_00081336	LOC_Os04g44490	0.988531
TCONS_00081336	LOC_Os12g22430	0.990551
TCONS_00081336	LOC_Os02g35920	0.99789
TCONS_00081336	LOC_Os02g46560	0.964218
TCONS_00081336	LOC_Os02g18980	0.960567
TCONS_00081336	LOC_Os02g19050	0.9573
TCONS_00081336	LOC_Os11g30940	0.958178
TCONS_00081336	LOC_Os10g30040	0.96772
TCONS_00081336	LOC_Os09g07350	0.993934
TCONS_00081336	LOC_Os12g01355	0.961685
TCONS_00081336	LOC_Os04g43210	0.969996
TCONS_00081336	LOC_Os03g32860	0.959099
TCONS_00081336	LOC_Os07g21970	0.999675
TCONS_00081336	LOC_Os11g39880	0.988531
TCONS_00081336	LOC_Os12g19790	0.967995
TCONS_00081336	LOC_Os10g32150	0.954163
TCONS_00081336	LOC_Os10g08080	0.996347
TCONS_00081336	LOC_Os07g18520	0.976085
TCONS_00081336	LOC_Os03g32200	0.955661
TCONS_00081336	LOC_Os06g25370	0.972313
TCONS_00081336	LOC_Os08g10970	0.98721
TCONS_00081336	LOC_Os05g32560	0.997354
TCONS_00081336	LOC_Os06g34620	0.961685
TCONS_00081336	LOC_Os03g45680	0.96386
TCONS_00081336	LOC_Os02g31210	0.961685
TCONS_00081336	LOC_Os06g49760	0.963319
TCONS_00081336	LOC_Os03g44240	0.965172
TCONS_00081336	LOC_Os04g43600	0.997072
TCONS_00081336	LOC_Os11g44170	0.965711
TCONS_00081336	LOC_Os02g29570	0.959099
TCONS_00081336	LOC_Os08g29260	0.963275
TCONS_00081336	LOC_Os07g31020	0.967836
TCONS_00081336	LOC_Os09g03430	0.95318
TCONS_00081336	LOC_Os04g53010	0.980751
TCONS_00081336	LOC_Os12g13920	0.977036
TCONS_00081336	LOC_Os03g36610	0.965711
TCONS_00081336	LOC_Os06g25350	0.959099
TCONS_00081336	LOC_Os12g33370	0.998814
TCONS_00081336	LOC_Os09g25350	0.959694
TCONS_00081336	LOC_Os11g17850	0.997605
TCONS_00081336	LOC_Os11g25110	0.956191
TCONS_00081336	LOC_Os09g40040	0.969718
TCONS_00081336	LOC_Os03g33172	0.998761
TCONS_00081336	LOC_Os04g19930	0.95914
TCONS_00081336	LOC_Os04g49220	0.959332
TCONS_00081336	LOC_Os11g22720	0.978521
TCONS_00081336	LOC_Os12g05580	0.963275
TCONS_00081336	LOC_Os07g01300	0.998978
TCONS_00081336	LOC_Os11g11870	0.997153
TCONS_00081336	LOC_Os05g25820	0.96386
TCONS_00081336	LOC_Os09g12860	0.976134
TCONS_00081336	LOC_Os06g24530	0.96215
TCONS_00081336	LOC_Os05g23910	0.998733
TCONS_00081336	LOC_Os07g17350	0.99266
TCONS_00081336	LOC_Os10g17290	0.965711
TCONS_00081336	LOC_Os03g43820	0.977173
TCONS_00081336	LOC_Os04g34630	0.997407
TCONS_00081336	LOC_Os12g41990	0.996347
TCONS_00081336	LOC_Os04g19250	0.959099
TCONS_00081336	LOC_Os12g01100	0.998086
TCONS_00081336	LOC_Os08g20359	0.984716
TCONS_00081336	LOC_Os11g14660	0.957614
TCONS_00081336	LOC_Os10g24430	0.977211
TCONS_00081336	LOC_Os05g04400	0.959099
TCONS_00081336	LOC_Os11g14450	0.99789
TCONS_00081336	LOC_Os07g02200	0.96045
TCONS_00081336	LOC_Os01g03790	0.998275
TCONS_00081336	LOC_Os07g02870	0.960786
TCONS_00081336	LOC_Os04g22840	0.993944
TCONS_00081336	LOC_Os04g19970	0.978834
TCONS_00081336	LOC_Os11g11300	0.95914
TCONS_00081336	LOC_Os07g25030	0.988209
TCONS_00081336	LOC_Os12g05940	0.965078
TCONS_00081336	LOC_Os01g29570	0.997705
TCONS_00081336	LOC_Os06g07370	0.994403
TCONS_00081336	LOC_Os07g18610	0.96772
TCONS_00081336	LOC_Os11g23160	0.965711
TCONS_00081336	LOC_Os02g36790	0.996347
TCONS_00081336	LOC_Os04g02660	0.998694
TCONS_00081336	LOC_Os09g08960	0.956462
TCONS_00081336	LOC_Os08g32230	0.997263
TCONS_00081336	LOC_Os09g20160	0.96215
TCONS_00081336	LOC_Os06g41290	0.954648
TCONS_00081336	LOC_Os07g46830	0.996347
TCONS_00081336	LOC_Os05g14790	0.996347
TCONS_00081336	LOC_Os04g14540	0.952882
TCONS_00081336	LOC_Os07g14490	0.995185
TCONS_00081336	LOC_Os02g19780	0.977796
TCONS_00081336	LOC_Os01g57380	0.998337
TCONS_00081336	LOC_Os03g33819	0.960459
TCONS_00081336	LOC_Os04g16350	0.999063
TCONS_00081336	LOC_Os05g51720	0.954163
TCONS_00081336	LOC_Os01g72620	0.957875
TCONS_00081336	LOC_Os04g29224	0.980148
TCONS_00081336	LOC_Os03g56700	0.960567
TCONS_00081336	LOC_Os01g65290	0.960442
TCONS_00081336	LOC_Os02g17630	0.955439
TCONS_00081336	LOC_Os03g52420	0.997808
TCONS_00081336	LOC_Os04g57830	0.950359
TCONS_00081336	LOC_Os08g07200	0.997605
TCONS_00081336	LOC_Os10g20370	0.958404
TCONS_00081336	LOC_Os01g57956	0.999227
TCONS_00081336	LOC_Os09g26120	0.999102
TCONS_00081336	LOC_Os12g18800	0.996347
TCONS_00081336	LOC_Os06g49560	0.961577
TCONS_00081336	LOC_Os07g32910	0.976696
TCONS_00081336	LOC_Os03g50790	0.965711
TCONS_00081336	LOC_Os09g28250	0.978119
TCONS_00081336	LOC_Os04g21290	0.999155
TCONS_00081336	LOC_Os04g35500	0.963607
TCONS_00081336	LOC_Os07g41210	0.955858
TCONS_00081336	LOC_Os01g55510	0.957407
TCONS_00081336	LOC_Os12g35180	0.961082
TCONS_00081336	LOC_Os02g40560	0.963275
TCONS_00081336	LOC_Os02g36600	0.971464
TCONS_00081336	LOC_Os05g16360	0.99685
TCONS_00081336	ChrUn.fgenesh.gene.2	0.998016
TCONS_00081336	LOC_Os09g23939	0.96215
TCONS_00081336	LOC_Os09g11410	0.978986
TCONS_00081336	LOC_Os12g09940	0.954599
TCONS_00081336	LOC_Os01g50720	0.961082
TCONS_00081336	LOC_Os05g13840	0.996661
TCONS_00081336	LOC_Os09g08210	0.954789
[truncated: 15,336 more rows]
