# Supplementary material for: Transcriptome Analysis of Rice Reveals the lncRNA–mRNA Regulatory Network in Response to Rice Black-Streaked Dwarf Virus Infection
Source: Viruses. 2020 Aug 27;12(9):951. doi: 10.3390/v12090951 (PMC7552052; doi:10.3390/v12090951)
Supplement: Supplementary file 1 [file viruses-12-00951-s001.zip › Table S10. Detail information of the DElncRNA-DEmRNA co-expressed pairs.xlsx]

## Sheet: Sheet1
lncRNA_ID	Up-Down-Regulation(RBSDV/CK)	log2Ratio(RBSDV/MOCK)	Gene_ID	Up-Down-Regulation(RBSDV/CK)	log2Ratio(RBSDV/MOCK)	Pathway	GO Component	GO Function	GO Process	Blast nr
TCONS_00009514	up	7.62476	LOC_Os01g72370	up	8.87085	-	GO:0090575//RNA polymerase II transcription factor complex	GO:0000977//RNA polymerase II regulatory region sequence-specific DNA binding;GO:0046983//protein dimerization activity;GO:0003700//transcription factor activity, sequence-specific DNA binding	GO:0006357//regulation of transcription from RNA polymerase II promoter;GO:0010106//cellular response to iron ion starvation;GO:0055072//iron ion homeostasis	gi|15528806|dbj|BAB64701.1|;gi|113534955|dbj|BAF07338.1|/1.20151e-163;1.05856e-162/bHLH transcription factor-like [Oryza sativa Japonica Group] ;Os01g0952800 [Oryza sativa Japonica Group]
TCONS_00008316	up	6.93456	LOC_Os01g72370	up	8.87085	-	GO:0090575//RNA polymerase II transcription factor complex	GO:0000977//RNA polymerase II regulatory region sequence-specific DNA binding;GO:0046983//protein dimerization activity;GO:0003700//transcription factor activity, sequence-specific DNA binding	GO:0006357//regulation of transcription from RNA polymerase II promoter;GO:0010106//cellular response to iron ion starvation;GO:0055072//iron ion homeostasis	gi|15528806|dbj|BAB64701.1|;gi|113534955|dbj|BAF07338.1|/1.20151e-163;1.05856e-162/bHLH transcription factor-like [Oryza sativa Japonica Group] ;Os01g0952800 [Oryza sativa Japonica Group]
TCONS_00089479	up	3.07091	LOC_Os01g03360	up	8.86533	-	GO:0005576//extracellular region;GO:0016023//cytoplasmic, membrane-bounded vesicle	GO:0004867//serine-type endopeptidase inhibitor activity	GO:0010951//negative regulation of endopeptidase activity	gi|152032528|sp|Q0JR25.2|IBBR_ORYSJ/3.39293e-175/RecName: Full=Bowman-Birk type bran trypsin inhibitor; AltName: Full=OSE727A; AltName: Full=Protein RBBI3-3; AltName: Full=RBTI; Flags: Precursor
TCONS_00065705	up	2.64989	LOC_Os01g03360	up	8.86533	-	GO:0005576//extracellular region;GO:0016023//cytoplasmic, membrane-bounded vesicle	GO:0004867//serine-type endopeptidase inhibitor activity	GO:0010951//negative regulation of endopeptidase activity	gi|152032528|sp|Q0JR25.2|IBBR_ORYSJ/3.39293e-175/RecName: Full=Bowman-Birk type bran trypsin inhibitor; AltName: Full=OSE727A; AltName: Full=Protein RBBI3-3; AltName: Full=RBTI; Flags: Precursor
TCONS_00065705	up	2.64989	LOC_Os01g37000	up	7.95758	-	GO:0016023//cytoplasmic, membrane-bounded vesicle	-	-	gi|113532834|dbj|BAF05217.1|/0/Os01g0550800 [Oryza sativa Japonica Group]
TCONS_00089479	up	3.07091	LOC_Os01g37000	up	7.95758	-	GO:0016023//cytoplasmic, membrane-bounded vesicle	-	-	gi|113532834|dbj|BAF05217.1|/0/Os01g0550800 [Oryza sativa Japonica Group]
TCONS_00081336	up	7.85557	LOC_Os03g26760	up	7.82704	ko03440//Homologous recombination;ko00240//Pyrimidine metabolism;ko01100//Metabolic pathways;ko03460//Fanconi anemia pathway;ko02020//Two-component system;ko02010//ABC transporters;ko00670//One carbon pool by folate	-	GO:0003676//nucleic acid binding;GO:0008270//zinc ion binding	GO:0015074//DNA integration	gi|108708504|gb|ABF96299.1|/0/retrotransposon protein, putative, Ty3-gypsy subclass, expressed [Oryza sativa Japonica Group]
TCONS_00081336	up	7.85557	LOC_Os09g36700	up	7.60822	-	GO:0016023//cytoplasmic, membrane-bounded vesicle	GO:0003723//RNA binding;GO:0033897//ribonuclease T2 activity	GO:0090502//RNA phosphodiester bond hydrolysis, endonucleolytic	gi|937934256|dbj|BAT09171.1|/9.23512e-165/Os09g0538000 [Oryza sativa Japonica Group]
TCONS_00089479	up	3.07091	LOC_Os09g36700	up	7.60822	-	GO:0016023//cytoplasmic, membrane-bounded vesicle	GO:0003723//RNA binding;GO:0033897//ribonuclease T2 activity	GO:0090502//RNA phosphodiester bond hydrolysis, endonucleolytic	gi|937934256|dbj|BAT09171.1|/9.23512e-165/Os09g0538000 [Oryza sativa Japonica Group]
TCONS_00065705	up	2.64989	LOC_Os09g36700	up	7.60822	-	GO:0016023//cytoplasmic, membrane-bounded vesicle	GO:0003723//RNA binding;GO:0033897//ribonuclease T2 activity	GO:0090502//RNA phosphodiester bond hydrolysis, endonucleolytic	gi|937934256|dbj|BAT09171.1|/9.23512e-165/Os09g0538000 [Oryza sativa Japonica Group]
TCONS_00091345	up	2.80973	LOC_Os09g36680	up	7.49183	-	GO:0016023//cytoplasmic, membrane-bounded vesicle	GO:0003723//RNA binding;GO:0033897//ribonuclease T2 activity	GO:0090502//RNA phosphodiester bond hydrolysis, endonucleolytic	gi|17105171|gb|AAL35582.1|AF439449_1/0/RNase S-like protein [Oryza sativa]
TCONS_00010868	up	2.63376	LOC_Os09g36680	up	7.49183	-	GO:0016023//cytoplasmic, membrane-bounded vesicle	GO:0003723//RNA binding;GO:0033897//ribonuclease T2 activity	GO:0090502//RNA phosphodiester bond hydrolysis, endonucleolytic	gi|17105171|gb|AAL35582.1|AF439449_1/0/RNase S-like protein [Oryza sativa]
TCONS_00056787	up	2.47695	LOC_Os09g36680	up	7.49183	-	GO:0016023//cytoplasmic, membrane-bounded vesicle	GO:0003723//RNA binding;GO:0033897//ribonuclease T2 activity	GO:0090502//RNA phosphodiester bond hydrolysis, endonucleolytic	gi|17105171|gb|AAL35582.1|AF439449_1/0/RNase S-like protein [Oryza sativa]
TCONS_00059822	up	2.24492	LOC_Os09g36680	up	7.49183	-	GO:0016023//cytoplasmic, membrane-bounded vesicle	GO:0003723//RNA binding;GO:0033897//ribonuclease T2 activity	GO:0090502//RNA phosphodiester bond hydrolysis, endonucleolytic	gi|17105171|gb|AAL35582.1|AF439449_1/0/RNase S-like protein [Oryza sativa]
TCONS_00009978	up	1.89024	LOC_Os11g18570	up	7.26586	ko01120//Microbial metabolism in diverse environments;ko01100//Metabolic pathways;ko00905//Brassinosteroid biosynthesis;ko01110//Biosynthesis of secondary metabolites;ko00020//Citrate cycle (TCA cycle)	GO:0016021//integral component of membrane;GO:0016023//cytoplasmic, membrane-bounded vesicle	GO:0016705//oxidoreductase activity, acting on paired donors, with incorporation or reduction of molecular oxygen;GO:0004497//monooxygenase activity;GO:0020037//heme binding;GO:0005506//iron ion binding	GO:0016132//brassinosteroid biosynthetic process;GO:0055114//oxidation-reduction process;GO:0010268//brassinosteroid homeostasis;GO:0007275//multicellular organism development;GO:0016125//sterol metabolic process	gi|77550029|gb|ABA92826.1|/0/Cytochrome P450 family protein, expressed [Oryza sativa Japonica Group]
TCONS_00009978	up	1.89024	LOC_Os11g18366	up	7.20141	ko01100//Metabolic pathways;ko00100//Steroid biosynthesis;ko01110//Biosynthesis of secondary metabolites	GO:0016020//membrane;GO:0016021//integral component of membrane	GO:0016866//intramolecular transferase activity	-	gi|108864254|gb|ABG22450.1|;gi|108864253|gb|ABG22449.1|;gi|108864255|gb|ABG22451.1|/0;0;0/Cycloartenol synthase, putative, expressed [Oryza sativa Japonica Group];Cycloartenol synthase, putative, expressed [Oryza sativa Japonica Group];Cycloartenol synthase, putative, expressed [Oryza sativa Japonica Group]
TCONS_00009514	up	7.62476	LOC_Os07g15460	up	7.17755	-	GO:0016021//integral component of membrane	GO:0005381//iron ion transmembrane transporter activity	GO:0055072//iron ion homeostasis;GO:0034755//iron ion transmembrane transport	gi|122167523|sp|Q0D7E4.1|NRAM1_ORYSJ/0/RecName: Full=Metal transporter Nramp1; Short=OsNramp1
TCONS_00008316	up	6.93456	LOC_Os07g15460	up	7.17755	-	GO:0016021//integral component of membrane	GO:0005381//iron ion transmembrane transporter activity	GO:0055072//iron ion homeostasis;GO:0034755//iron ion transmembrane transport	gi|122167523|sp|Q0D7E4.1|NRAM1_ORYSJ/0/RecName: Full=Metal transporter Nramp1; Short=OsNramp1
TCONS_00059822	up	2.24492	LOC_Os08g05360	up	7.09797	-	-	GO:0008270//zinc ion binding	-	gi|77551147|gb|ABA93944.1|/0/transposon protein, putative, Mutator sub-class [Oryza sativa Japonica Group]
TCONS_00008924	up	2.83107	LOC_Os08g05360	up	7.09797	-	-	GO:0008270//zinc ion binding	-	gi|77551147|gb|ABA93944.1|/0/transposon protein, putative, Mutator sub-class [Oryza sativa Japonica Group]
TCONS_00091345	up	2.80973	LOC_Os08g05360	up	7.09797	-	-	GO:0008270//zinc ion binding	-	gi|77551147|gb|ABA93944.1|/0/transposon protein, putative, Mutator sub-class [Oryza sativa Japonica Group]
TCONS_00005781	up	3.08006	LOC_Os08g05360	up	7.09797	-	-	GO:0008270//zinc ion binding	-	gi|77551147|gb|ABA93944.1|/0/transposon protein, putative, Mutator sub-class [Oryza sativa Japonica Group]
TCONS_00010868	up	2.63376	LOC_Os08g05360	up	7.09797	-	-	GO:0008270//zinc ion binding	-	gi|77551147|gb|ABA93944.1|/0/transposon protein, putative, Mutator sub-class [Oryza sativa Japonica Group]
TCONS_00089479	up	3.07091	LOC_Os04g52440	up	6.8819	ko00260//Glycine, serine and threonine metabolism;ko00330//Arginine and proline metabolism;ko00680//Methane metabolism;ko00430//Taurine and hypotaurine metabolism;ko01120//Microbial metabolism in diverse environments;ko01100//Metabolic pathways;ko00640//Propanoate metabolism;ko00620//Pyruvate metabolism;ko01110//Biosynthesis of secondary metabolites;ko00250//Alanine, aspartate and glutamate metab…	GO:0005739//mitochondrion	GO:0030170//pyridoxal phosphate binding;GO:0042802//identical protein binding;GO:0008483//transaminase activity	-	gi|1002262742|ref|XP_015635716.1|/0/PREDICTED: probable gamma-aminobutyrate transaminase 2, mitochondrial isoform X1 [Oryza sativa Japonica Group]
TCONS_00065705	up	2.64989	LOC_Os04g52440	up	6.8819	ko00260//Glycine, serine and threonine metabolism;ko00330//Arginine and proline metabolism;ko00680//Methane metabolism;ko00430//Taurine and hypotaurine metabolism;ko01120//Microbial metabolism in diverse environments;ko01100//Metabolic pathways;ko00640//Propanoate metabolism;ko00620//Pyruvate metabolism;ko01110//Biosynthesis of secondary metabolites;ko00250//Alanine, aspartate and glutamate metab…	GO:0005739//mitochondrion	GO:0030170//pyridoxal phosphate binding;GO:0042802//identical protein binding;GO:0008483//transaminase activity	-	gi|1002262742|ref|XP_015635716.1|/0/PREDICTED: probable gamma-aminobutyrate transaminase 2, mitochondrial isoform X1 [Oryza sativa Japonica Group]
TCONS_00059822	up	2.24492	LOC_Os12g31140	up	6.71565	-	-	GO:0003677//DNA binding;GO:0008234//cysteine-type peptidase activity	GO:0006508//proteolysis	gi|32490233|emb|CAE05677.1|/0/OSJNBb0033P05.16 [Oryza sativa Japonica Group]
TCONS_00091345	up	2.80973	LOC_Os12g31140	up	6.71565	-	-	GO:0003677//DNA binding;GO:0008234//cysteine-type peptidase activity	GO:0006508//proteolysis	gi|32490233|emb|CAE05677.1|/0/OSJNBb0033P05.16 [Oryza sativa Japonica Group]
TCONS_00008316	up	6.93456	LOC_Os12g31140	up	6.71565	-	-	GO:0003677//DNA binding;GO:0008234//cysteine-type peptidase activity	GO:0006508//proteolysis	gi|32490233|emb|CAE05677.1|/0/OSJNBb0033P05.16 [Oryza sativa Japonica Group]
TCONS_00005781	up	3.08006	LOC_Os12g31140	up	6.71565	-	-	GO:0003677//DNA binding;GO:0008234//cysteine-type peptidase activity	GO:0006508//proteolysis	gi|32490233|emb|CAE05677.1|/0/OSJNBb0033P05.16 [Oryza sativa Japonica Group]
TCONS_00009978	up	1.89024	LOC_Os10g40700	up	6.7106	-	GO:0005576//extracellular region;GO:0016020//membrane;GO:0016023//cytoplasmic, membrane-bounded vesicle;GO:0005618//cell wall	-	GO:0071555//cell wall organization;GO:0019953//sexual reproduction	gi|75232353|sp|Q7XCA7.1|EXPB6_ORYSJ/0/RecName: Full=Expansin-B6; AltName: Full=Beta-expansin-6; AltName: Full=OsEXPB6; AltName: Full=OsaEXPb1.8; Flags: Precursor
TCONS_00059822	up	2.24492	LOC_Os03g56930	up	6.70859	-	-	-	-	-
TCONS_00008924	up	2.83107	LOC_Os03g56930	up	6.70859	-	-	-	-	-
TCONS_00091345	up	2.80973	LOC_Os03g56930	up	6.70859	-	-	-	-	-
TCONS_00005781	up	3.08006	LOC_Os03g56930	up	6.70859	-	-	-	-	-
TCONS_00010868	up	2.63376	LOC_Os03g56930	up	6.70859	-	-	-	-	-
TCONS_00059822	up	2.24492	LOC_Os06g35520	up	6.65116	ko00940//Phenylpropanoid biosynthesis;ko00360//Phenylalanine metabolism;ko01100//Metabolic pathways;ko01110//Biosynthesis of secondary metabolites	GO:0005576//extracellular region;GO:0016023//cytoplasmic, membrane-bounded vesicle	GO:0046872//metal ion binding;GO:0020037//heme binding;GO:0004601//peroxidase activity	GO:0098869//cellular oxidant detoxification;GO:0006979//response to oxidative stress;GO:0042744//hydrogen peroxide catabolic process;GO:0055114//oxidation-reduction process	gi|1002279095|ref|XP_015643864.1|/0/PREDICTED: peroxidase P7 [Oryza sativa Japonica Group]
TCONS_00091345	up	2.80973	LOC_Os06g35520	up	6.65116	ko00940//Phenylpropanoid biosynthesis;ko00360//Phenylalanine metabolism;ko01100//Metabolic pathways;ko01110//Biosynthesis of secondary metabolites	GO:0005576//extracellular region;GO:0016023//cytoplasmic, membrane-bounded vesicle	GO:0046872//metal ion binding;GO:0020037//heme binding;GO:0004601//peroxidase activity	GO:0098869//cellular oxidant detoxification;GO:0006979//response to oxidative stress;GO:0042744//hydrogen peroxide catabolic process;GO:0055114//oxidation-reduction process	gi|1002279095|ref|XP_015643864.1|/0/PREDICTED: peroxidase P7 [Oryza sativa Japonica Group]
TCONS_00005781	up	3.08006	LOC_Os06g35520	up	6.65116	ko00940//Phenylpropanoid biosynthesis;ko00360//Phenylalanine metabolism;ko01100//Metabolic pathways;ko01110//Biosynthesis of secondary metabolites	GO:0005576//extracellular region;GO:0016023//cytoplasmic, membrane-bounded vesicle	GO:0046872//metal ion binding;GO:0020037//heme binding;GO:0004601//peroxidase activity	GO:0098869//cellular oxidant detoxification;GO:0006979//response to oxidative stress;GO:0042744//hydrogen peroxide catabolic process;GO:0055114//oxidation-reduction process	gi|1002279095|ref|XP_015643864.1|/0/PREDICTED: peroxidase P7 [Oryza sativa Japonica Group]
TCONS_00056787	up	2.47695	LOC_Os06g35520	up	6.65116	ko00940//Phenylpropanoid biosynthesis;ko00360//Phenylalanine metabolism;ko01100//Metabolic pathways;ko01110//Biosynthesis of secondary metabolites	GO:0005576//extracellular region;GO:0016023//cytoplasmic, membrane-bounded vesicle	GO:0046872//metal ion binding;GO:0020037//heme binding;GO:0004601//peroxidase activity	GO:0098869//cellular oxidant detoxification;GO:0006979//response to oxidative stress;GO:0042744//hydrogen peroxide catabolic process;GO:0055114//oxidation-reduction process	gi|1002279095|ref|XP_015643864.1|/0/PREDICTED: peroxidase P7 [Oryza sativa Japonica Group]
TCONS_00065705	up	2.64989	LOC_Os01g28500	up	6.58452	ko04626//Plant-pathogen interaction;ko04075//Plant hormone signal transduction	GO:0005576//extracellular region;GO:0016023//cytoplasmic, membrane-bounded vesicle	-	GO:0006952//defense response;GO:0009607//response to biotic stimulus	gi|113532622|dbj|BAF05005.1|/2.75482e-123/Os01g0382400 [Oryza sativa Japonica Group]
TCONS_00089479	up	3.07091	LOC_Os01g28500	up	6.58452	ko04626//Plant-pathogen interaction;ko04075//Plant hormone signal transduction	GO:0005576//extracellular region;GO:0016023//cytoplasmic, membrane-bounded vesicle	-	GO:0006952//defense response;GO:0009607//response to biotic stimulus	gi|113532622|dbj|BAF05005.1|/2.75482e-123/Os01g0382400 [Oryza sativa Japonica Group]
TCONS_00065705	up	2.64989	LOC_Os04g56430	up	6.55333	-	GO:0009506//plasmodesma;GO:0016023//cytoplasmic, membrane-bounded vesicle;GO:0005886//plasma membrane	GO:0004674//protein serine/threonine kinase activity	GO:0006952//defense response;GO:0006468//protein phosphorylation	gi|33465895|gb|AAQ19329.1|/6.44434e-164/receptor like-protein kinase DUF26 [Oryza sativa]
TCONS_00089479	up	3.07091	LOC_Os04g56430	up	6.55333	-	GO:0009506//plasmodesma;GO:0016023//cytoplasmic, membrane-bounded vesicle;GO:0005886//plasma membrane	GO:0004674//protein serine/threonine kinase activity	GO:0006952//defense response;GO:0006468//protein phosphorylation	gi|33465895|gb|AAQ19329.1|/6.44434e-164/receptor like-protein kinase DUF26 [Oryza sativa]
TCONS_00089479	up	3.07091	LOC_Os10g02880	up	6.41142	ko00940//Phenylpropanoid biosynthesis;ko01100//Metabolic pathways;ko00945//Stilbenoid, diarylheptanoid and gingerol biosynthesis;ko01110//Biosynthesis of secondary metabolites;ko00944//Flavone and flavonol biosynthesis;ko00402//Benzoxazinoid biosynthesis	-	GO:0046983//protein dimerization activity;GO:0008757//S-adenosylmethionine-dependent methyltransferase activity;GO:0008171//O-methyltransferase activity	GO:0032259//methylation;GO:0019438//aromatic compound biosynthetic process	gi|31429903|gb|AAP51892.1|/0/O-methyltransferase family protein, expressed [Oryza sativa Japonica Group]
TCONS_00065705	up	2.64989	LOC_Os10g02880	up	6.41142	ko00940//Phenylpropanoid biosynthesis;ko01100//Metabolic pathways;ko00945//Stilbenoid, diarylheptanoid and gingerol biosynthesis;ko01110//Biosynthesis of secondary metabolites;ko00944//Flavone and flavonol biosynthesis;ko00402//Benzoxazinoid biosynthesis	-	GO:0046983//protein dimerization activity;GO:0008757//S-adenosylmethionine-dependent methyltransferase activity;GO:0008171//O-methyltransferase activity	GO:0032259//methylation;GO:0019438//aromatic compound biosynthetic process	gi|31429903|gb|AAP51892.1|/0/O-methyltransferase family protein, expressed [Oryza sativa Japonica Group]
TCONS_00059822	up	2.24492	LOC_Os03g19427	up	6.30475	-	-	GO:0030410//nicotianamine synthase activity	GO:0030418//nicotianamine biosynthetic process;GO:0006826//iron ion transport	gi|122170359|sp|Q0DSH9.1|NAS1_ORYSJ/0/RecName: Full=Nicotianamine synthase 1; AltName: Full=S-adenosyl-L-methionine:S-adenosyl-L-methionine:S-adenosyl-methionine 3-amino-3-carboxypropyltransferase 1; Short=OsNAS1
TCONS_00008924	up	2.83107	LOC_Os03g19427	up	6.30475	-	-	GO:0030410//nicotianamine synthase activity	GO:0030418//nicotianamine biosynthetic process;GO:0006826//iron ion transport	gi|122170359|sp|Q0DSH9.1|NAS1_ORYSJ/0/RecName: Full=Nicotianamine synthase 1; AltName: Full=S-adenosyl-L-methionine:S-adenosyl-L-methionine:S-adenosyl-methionine 3-amino-3-carboxypropyltransferase 1; Short=OsNAS1
TCONS_00091345	up	2.80973	LOC_Os03g19427	up	6.30475	-	-	GO:0030410//nicotianamine synthase activity	GO:0030418//nicotianamine biosynthetic process;GO:0006826//iron ion transport	gi|122170359|sp|Q0DSH9.1|NAS1_ORYSJ/0/RecName: Full=Nicotianamine synthase 1; AltName: Full=S-adenosyl-L-methionine:S-adenosyl-L-methionine:S-adenosyl-methionine 3-amino-3-carboxypropyltransferase 1; Short=OsNAS1
TCONS_00005781	up	3.08006	LOC_Os03g19427	up	6.30475	-	-	GO:0030410//nicotianamine synthase activity	GO:0030418//nicotianamine biosynthetic process;GO:0006826//iron ion transport	gi|122170359|sp|Q0DSH9.1|NAS1_ORYSJ/0/RecName: Full=Nicotianamine synthase 1; AltName: Full=S-adenosyl-L-methionine:S-adenosyl-L-methionine:S-adenosyl-methionine 3-amino-3-carboxypropyltransferase 1; Short=OsNAS1
TCONS_00005792	up	2.63888	LOC_Os03g19427	up	6.30475	-	-	GO:0030410//nicotianamine synthase activity	GO:0030418//nicotianamine biosynthetic process;GO:0006826//iron ion transport	gi|122170359|sp|Q0DSH9.1|NAS1_ORYSJ/0/RecName: Full=Nicotianamine synthase 1; AltName: Full=S-adenosyl-L-methionine:S-adenosyl-L-methionine:S-adenosyl-methionine 3-amino-3-carboxypropyltransferase 1; Short=OsNAS1
TCONS_00010868	up	2.63376	LOC_Os03g19427	up	6.30475	-	-	GO:0030410//nicotianamine synthase activity	GO:0030418//nicotianamine biosynthetic process;GO:0006826//iron ion transport	gi|122170359|sp|Q0DSH9.1|NAS1_ORYSJ/0/RecName: Full=Nicotianamine synthase 1; AltName: Full=S-adenosyl-L-methionine:S-adenosyl-L-methionine:S-adenosyl-methionine 3-amino-3-carboxypropyltransferase 1; Short=OsNAS1
TCONS_00070703	up	3.1046	LOC_Os06g18670	up	6.27182	ko00943//Isoflavonoid biosynthesis;ko00940//Phenylpropanoid biosynthesis	GO:0043231//intracellular membrane-bounded organelle	GO:0080044//quercetin 7-O-glucosyltransferase activity;GO:0080043//quercetin 3-O-glucosyltransferase activity;GO:0000166//nucleotide binding	GO:0009813//flavonoid biosynthetic process;GO:0052696//flavonoid glucuronidation	gi|113595457|dbj|BAF19331.1|/0/Os06g0289900 [Oryza sativa Japonica Group]
TCONS_00065705	up	2.64989	LOC_Os12g43440	up	6.22023	-	GO:0005576//extracellular region;GO:0016023//cytoplasmic, membrane-bounded vesicle	-	-	gi|113649842|dbj|BAF30354.1|/1.28538e-108/Os12g0630100 [Oryza sativa Japonica Group]
TCONS_00081336	up	7.85557	LOC_Os04g12040	up	6.18556	ko03440//Homologous recombination;ko00240//Pyrimidine metabolism;ko01100//Metabolic pathways;ko03460//Fanconi anemia pathway;ko02020//Two-component system;ko02010//ABC transporters;ko00670//One carbon pool by folate	GO:0009536//plastid;GO:0005739//mitochondrion	GO:0004523//RNA-DNA hybrid ribonuclease activity;GO:0003676//nucleic acid binding	GO:0090502//RNA phosphodiester bond hydrolysis, endonucleolytic;GO:0015074//DNA integration	gi|38344225|emb|CAE03695.2|/0/OSJNBb0026E15.13 [Oryza sativa Japonica Group]
TCONS_00059316	up	2.2842	LOC_Os04g12040	up	6.18556	ko03440//Homologous recombination;ko00240//Pyrimidine metabolism;ko01100//Metabolic pathways;ko03460//Fanconi anemia pathway;ko02020//Two-component system;ko02010//ABC transporters;ko00670//One carbon pool by folate	GO:0009536//plastid;GO:0005739//mitochondrion	GO:0004523//RNA-DNA hybrid ribonuclease activity;GO:0003676//nucleic acid binding	GO:0090502//RNA phosphodiester bond hydrolysis, endonucleolytic;GO:0015074//DNA integration	gi|38344225|emb|CAE03695.2|/0/OSJNBb0026E15.13 [Oryza sativa Japonica Group]
TCONS_00059316	up	2.2842	LOC_Os02g04200	up	6.03888	-	-	GO:0008270//zinc ion binding	-	gi|18855019|gb|AAL79711.1|AC091774_2/0/putative transposon protein [Oryza sativa Japonica Group]
TCONS_00008924	up	2.83107	LOC_Os11g26790	up	5.92662	-	-	-	-	gi|122207812|sp|Q2R4Z4.1|DHR21_ORYSJ/2.42335e-24/RecName: Full=Water stress-inducible protein Rab21
TCONS_00091345	up	2.80973	LOC_Os11g26790	up	5.92662	-	-	-	-	gi|122207812|sp|Q2R4Z4.1|DHR21_ORYSJ/2.42335e-24/RecName: Full=Water stress-inducible protein Rab21
TCONS_00005781	up	3.08006	LOC_Os11g26790	up	5.92662	-	-	-	-	gi|122207812|sp|Q2R4Z4.1|DHR21_ORYSJ/2.42335e-24/RecName: Full=Water stress-inducible protein Rab21
TCONS_00005792	up	2.63888	LOC_Os11g26790	up	5.92662	-	-	-	-	gi|122207812|sp|Q2R4Z4.1|DHR21_ORYSJ/2.42335e-24/RecName: Full=Water stress-inducible protein Rab21
TCONS_00010868	up	2.63376	LOC_Os11g26790	up	5.92662	-	-	-	-	gi|122207812|sp|Q2R4Z4.1|DHR21_ORYSJ/2.42335e-24/RecName: Full=Water stress-inducible protein Rab21
TCONS_00059822	up	2.24492	LOC_Os11g26790	up	5.92662	-	-	-	-	gi|122207812|sp|Q2R4Z4.1|DHR21_ORYSJ/2.42335e-24/RecName: Full=Water stress-inducible protein Rab21
TCONS_00059822	up	2.24492	LOC_Os10g33810	up	5.72856	-	-	GO:0003677//DNA binding	-	gi|10140742|gb|AAG13574.1|AC037425_5/1.00374e-155/myb factor [Oryza sativa Japonica Group]
TCONS_00056787	up	2.47695	LOC_Os10g33810	up	5.72856	-	-	GO:0003677//DNA binding	-	gi|10140742|gb|AAG13574.1|AC037425_5/1.00374e-155/myb factor [Oryza sativa Japonica Group]
TCONS_00009514	up	7.62476	LOC_Os03g54850	up	5.69954	-	-	-	-	gi|37718797|gb|AAR01668.1|/0/hypothetical protein [Oryza sativa Japonica Group]
TCONS_00089479	up	3.07091	LOC_Os12g43490	up	5.67695	-	GO:0016023//cytoplasmic, membrane-bounded vesicle	-	-	gi|1002310775|ref|XP_015618746.1|/4.55133e-170/PREDICTED: alpha-amylase/trypsin inhibitor [Oryza sativa Japonica Group]
TCONS_00065705	up	2.64989	LOC_Os12g43490	up	5.67695	-	GO:0016023//cytoplasmic, membrane-bounded vesicle	-	-	gi|1002310775|ref|XP_015618746.1|/4.55133e-170/PREDICTED: alpha-amylase/trypsin inhibitor [Oryza sativa Japonica Group]
TCONS_00008316	up	6.93456	LOC_Os04g48930	up	5.48432	ko04626//Plant-pathogen interaction	GO:0016020//membrane	-	-	gi|116309691|emb|CAH66739.1|;gi|937915711|dbj|BAS90630.1|/0;0/H0404F02.15 [Oryza sativa Indica Group];Os04g0578600, partial [Oryza sativa Japonica Group]
TCONS_00005781	up	3.08006	LOC_Os04g48930	up	5.48432	ko04626//Plant-pathogen interaction	GO:0016020//membrane	-	-	gi|116309691|emb|CAH66739.1|;gi|937915711|dbj|BAS90630.1|/0;0/H0404F02.15 [Oryza sativa Indica Group];Os04g0578600, partial [Oryza sativa Japonica Group]
TCONS_00059822	up	2.24492	LOC_Os04g48930	up	5.48432	ko04626//Plant-pathogen interaction	GO:0016020//membrane	-	-	gi|116309691|emb|CAH66739.1|;gi|937915711|dbj|BAS90630.1|/0;0/H0404F02.15 [Oryza sativa Indica Group];Os04g0578600, partial [Oryza sativa Japonica Group]
TCONS_00056787	up	2.47695	LOC_Os04g12970	up	5.45875	-	GO:0043231//intracellular membrane-bounded organelle	GO:0080043//quercetin 3-O-glucosyltransferase activity;GO:0080044//quercetin 7-O-glucosyltransferase activity	GO:0009813//flavonoid biosynthetic process;GO:0052696//flavonoid glucuronidation	gi|38345012|emb|CAE01609.2|/0/OSJNBa0052O21.15 [Oryza sativa Japonica Group]
TCONS_00089479	up	3.07091	LOC_Os06g13390	up	5.36555	ko00592//alpha-Linolenic acid metabolism	-	GO:0016740//transferase activity	-	gi|937922084|dbj|BAS97001.1|/0/Os06g0242000, partial [Oryza sativa Japonica Group]
TCONS_00065705	up	2.64989	LOC_Os06g13390	up	5.36555	ko00592//alpha-Linolenic acid metabolism	-	GO:0016740//transferase activity	-	gi|937922084|dbj|BAS97001.1|/0/Os06g0242000, partial [Oryza sativa Japonica Group]
TCONS_00009514	up	7.62476	LOC_Os11g15624	up	5.34214	-	-	-	-	gi|1002293957|ref|XP_015651309.1|;gi|149390977|gb|ABR25506.1|/2.93317e-09;5.45323e-55/PREDICTED: uncharacterized protein LOC107282084 isoform X2 [Oryza sativa Japonica Group];unknown, partial [Oryza sativa Indica Group]
TCONS_00008316	up	6.93456	LOC_Os11g15624	up	5.34214	-	-	-	-	gi|1002293957|ref|XP_015651309.1|;gi|149390977|gb|ABR25506.1|/2.93317e-09;5.45323e-55/PREDICTED: uncharacterized protein LOC107282084 isoform X2 [Oryza sativa Japonica Group];unknown, partial [Oryza sativa Indica Group]
TCONS_00059822	up	2.24492	LOC_Os12g27830	up	5.30559	-	GO:0016021//integral component of membrane;GO:0016023//cytoplasmic, membrane-bounded vesicle	-	-	gi|108862659|gb|ABA98146.2|/0/oxidoreductase, short chain dehydrogenase/reductase family protein, expressed [Oryza sativa Japonica Group]
TCONS_00091345	up	2.80973	LOC_Os12g27830	up	5.30559	-	GO:0016021//integral component of membrane;GO:0016023//cytoplasmic, membrane-bounded vesicle	-	-	gi|108862659|gb|ABA98146.2|/0/oxidoreductase, short chain dehydrogenase/reductase family protein, expressed [Oryza sativa Japonica Group]
TCONS_00005781	up	3.08006	LOC_Os12g27830	up	5.30559	-	GO:0016021//integral component of membrane;GO:0016023//cytoplasmic, membrane-bounded vesicle	-	-	gi|108862659|gb|ABA98146.2|/0/oxidoreductase, short chain dehydrogenase/reductase family protein, expressed [Oryza sativa Japonica Group]
TCONS_00010868	up	2.63376	LOC_Os12g27830	up	5.30559	-	GO:0016021//integral component of membrane;GO:0016023//cytoplasmic, membrane-bounded vesicle	-	-	gi|108862659|gb|ABA98146.2|/0/oxidoreductase, short chain dehydrogenase/reductase family protein, expressed [Oryza sativa Japonica Group]
TCONS_00056787	up	2.47695	LOC_Os12g27830	up	5.30559	-	GO:0016021//integral component of membrane;GO:0016023//cytoplasmic, membrane-bounded vesicle	-	-	gi|108862659|gb|ABA98146.2|/0/oxidoreductase, short chain dehydrogenase/reductase family protein, expressed [Oryza sativa Japonica Group]
TCONS_00059316	up	2.2842	LOC_Os01g28960	up	5.30049	-	-	-	-	gi|77551641|gb|ABA94438.1|/2.91416e-161/retrotransposon protein, putative, Ty3-gypsy subclass [Oryza sativa Japonica Group]
TCONS_00009514	up	7.62476	LOC_Os07g04930	up	5.25523	-	GO:0016023//cytoplasmic, membrane-bounded vesicle	-	GO:0007275//multicellular organism development	gi|24059937|dbj|BAC21400.1|/4.35528e-11/proline-rich protein-like [Oryza sativa Japonica Group]
TCONS_00008316	up	6.93456	LOC_Os07g04930	up	5.25523	-	GO:0016023//cytoplasmic, membrane-bounded vesicle	-	GO:0007275//multicellular organism development	gi|24059937|dbj|BAC21400.1|/4.35528e-11/proline-rich protein-like [Oryza sativa Japonica Group]
TCONS_00089479	up	3.07091	LOC_Os08g10310	up	5.21338	ko05142//Chagas disease (American trypanosomiasis);ko05133//Pertussis;ko05145//Toxoplasmosis;ko04626//Plant-pathogen interaction;ko04075//Plant hormone signal transduction;ko04722//Neurotrophin signaling pathway;ko05162//Measles;ko04620//Toll-like receptor signaling pathway;ko05164//Influenza A;ko05140//Leishmaniasis;ko05152//Tuberculosis;ko04064//NF-kappa B signaling pathway;ko04210//Apoptosis	GO:0005886//plasma membrane;GO:0016021//integral component of membrane;GO:0016023//cytoplasmic, membrane-bounded vesicle;GO:0005739//mitochondrion	GO:0005524//ATP binding;GO:0004674//protein serine/threonine kinase activity	GO:0006468//protein phosphorylation	gi|1002291248|ref|XP_015649962.1|;gi|113623192|dbj|BAF23137.1|/0;0/PREDICTED: probable LRR receptor-like serine/threonine-protein kinase At1g56140 isoform X2 [Oryza sativa Japonica Group];Os08g0203400 [Oryza sativa Japonica Group]
TCONS_00065705	up	2.64989	LOC_Os08g10310	up	5.21338	ko05142//Chagas disease (American trypanosomiasis);ko05133//Pertussis;ko05145//Toxoplasmosis;ko04626//Plant-pathogen interaction;ko04075//Plant hormone signal transduction;ko04722//Neurotrophin signaling pathway;ko05162//Measles;ko04620//Toll-like receptor signaling pathway;ko05164//Influenza A;ko05140//Leishmaniasis;ko05152//Tuberculosis;ko04064//NF-kappa B signaling pathway;ko04210//Apoptosis	GO:0005886//plasma membrane;GO:0016021//integral component of membrane;GO:0016023//cytoplasmic, membrane-bounded vesicle;GO:0005739//mitochondrion	GO:0005524//ATP binding;GO:0004674//protein serine/threonine kinase activity	GO:0006468//protein phosphorylation	gi|1002291248|ref|XP_015649962.1|;gi|113623192|dbj|BAF23137.1|/0;0/PREDICTED: probable LRR receptor-like serine/threonine-protein kinase At1g56140 isoform X2 [Oryza sativa Japonica Group];Os08g0203400 [Oryza sativa Japonica Group]
TCONS_00009514	up	7.62476	LOC_Os02g43370	up	5.19284	-	GO:0016021//integral component of membrane;GO:0005886//plasma membrane	-	GO:0055072//iron ion homeostasis;GO:0006811//ion transport;GO:0055085//transmembrane transport	gi|223635842|sp|Q6H3Z6.2|YSL2_ORYSJ/0/RecName: Full=Metal-nicotianamine transporter YSL2; AltName: Full=Protein YELLOW STRIPE LIKE 2; Short=OsYSL2
TCONS_00008316	up	6.93456	LOC_Os02g43370	up	5.19284	-	GO:0016021//integral component of membrane;GO:0005886//plasma membrane	-	GO:0055072//iron ion homeostasis;GO:0006811//ion transport;GO:0055085//transmembrane transport	gi|223635842|sp|Q6H3Z6.2|YSL2_ORYSJ/0/RecName: Full=Metal-nicotianamine transporter YSL2; AltName: Full=Protein YELLOW STRIPE LIKE 2; Short=OsYSL2
TCONS_00009514	up	7.62476	LOC_Os03g48770	up	5.16172	-	GO:0005618//cell wall;GO:0048046//apoplast;GO:0016023//cytoplasmic, membrane-bounded vesicle	GO:0045735//nutrient reservoir activity;GO:0030145//manganese ion binding;GO:0046564//oxalate decarboxylase activity	GO:0033609//oxalate metabolic process	gi|75243631|sp|Q851K0.1|GL35_ORYSJ/7.18672e-165/RecName: Full=Germin-like protein 3-5; Flags: Precursor
TCONS_00008316	up	6.93456	LOC_Os03g48770	up	5.16172	-	GO:0005618//cell wall;GO:0048046//apoplast;GO:0016023//cytoplasmic, membrane-bounded vesicle	GO:0045735//nutrient reservoir activity;GO:0030145//manganese ion binding;GO:0046564//oxalate decarboxylase activity	GO:0033609//oxalate metabolic process	gi|75243631|sp|Q851K0.1|GL35_ORYSJ/7.18672e-165/RecName: Full=Germin-like protein 3-5; Flags: Precursor
TCONS_00089479	up	3.07091	LOC_Os01g42370	up	5.16137	ko03040//Spliceosome;ko04976//Bile secretion;ko02010//ABC transporters	GO:0005886//plasma membrane;GO:0016021//integral component of membrane	GO:0042626//ATPase activity, coupled to transmembrane movement of substances;GO:0005524//ATP binding	GO:0055085//transmembrane transport	gi|113533069|dbj|BAF05452.1|/0/Os01g0609200 [Oryza sativa Japonica Group]
TCONS_00065705	up	2.64989	LOC_Os01g42370	up	5.16137	ko03040//Spliceosome;ko04976//Bile secretion;ko02010//ABC transporters	GO:0005886//plasma membrane;GO:0016021//integral component of membrane	GO:0042626//ATPase activity, coupled to transmembrane movement of substances;GO:0005524//ATP binding	GO:0055085//transmembrane transport	gi|113533069|dbj|BAF05452.1|/0/Os01g0609200 [Oryza sativa Japonica Group]
TCONS_00009514	up	7.62476	LOC_Os12g13340	up	5.01632	-	GO:0044611//nuclear pore inner ring	GO:0017056//structural constituent of nuclear pore	GO:0006999//nuclear pore organization;GO:0000059//protein import into nucleus, docking	gi|108862382|gb|ABG21937.1|;gi|77554105|gb|ABA96901.1|/0;0/expressed protein [Oryza sativa Japonica Group];expressed protein [Oryza sativa Japonica Group]
TCONS_00008316	up	6.93456	LOC_Os12g13340	up	5.01632	-	GO:0044611//nuclear pore inner ring	GO:0017056//structural constituent of nuclear pore	GO:0006999//nuclear pore organization;GO:0000059//protein import into nucleus, docking	gi|108862382|gb|ABG21937.1|;gi|77554105|gb|ABA96901.1|/0;0/expressed protein [Oryza sativa Japonica Group];expressed protein [Oryza sativa Japonica Group]
TCONS_00070703	up	3.1046	LOC_Os02g37654	up	5.00878	ko00564//Glycerophospholipid metabolism;ko04142//Lysosome	-	GO:0008374//O-acyltransferase activity	GO:0006629//lipid metabolic process	gi|113536809|dbj|BAF09192.1|/0/Os02g0589000 [Oryza sativa Japonica Group]
TCONS_00070703	up	3.1046	LOC_Os06g01250	up	5.00189	ko00941//Flavonoid biosynthesis;ko00943//Isoflavonoid biosynthesis;ko01100//Metabolic pathways;ko00909//Sesquiterpenoid and triterpenoid biosynthesis;ko01110//Biosynthesis of secondary metabolites;ko00944//Flavone and flavonol biosynthesis	GO:0016021//integral component of membrane	GO:0016709//oxidoreductase activity, acting on paired donors, with incorporation or reduction of molecular oxygen, NAD(P)H as one donor, and incorporation of one atom of oxygen;GO:0020037//heme binding;GO:0005506//iron ion binding	GO:0044550//secondary metabolite biosynthetic process;GO:0055114//oxidation-reduction process	gi|113594573|dbj|BAF18447.1|/0/Os06g0102100 [Oryza sativa Japonica Group]
TCONS_00070703	up	3.1046	LOC_Os03g05840	up	4.996	-	-	GO:0071949//FAD binding;GO:0004497//monooxygenase activity	GO:0044550//secondary metabolite biosynthetic process;GO:0055114//oxidation-reduction process	gi|108706238|gb|ABF94033.1|/3.34945e-141/monooxygenase, putative, expressed [Oryza sativa Japonica Group]
TCONS_00081336	up	7.85557	LOC_Os01g38580	up	4.99397	ko01100//Metabolic pathways;ko00906//Carotenoid biosynthesis;ko01110//Biosynthesis of secondary metabolites	GO:0009507//chloroplast	GO:0046872//metal ion binding;GO:0016702//oxidoreductase activity, acting on single donors with incorporation of molecular oxygen, incorporation of two atoms of oxygen	GO:1901601//strigolactone biosynthetic process;GO:0010223//secondary shoot formation;GO:0055114//oxidation-reduction process;GO:0016121//carotene catabolic process	gi|125526469|gb|EAY74583.1|/0/hypothetical protein OsI_02472 [Oryza sativa Indica Group]
TCONS_00056787	up	2.47695	LOC_Os04g52260	up	4.95793	-	GO:0016023//cytoplasmic, membrane-bounded vesicle	-	-	gi|38568019|emb|CAE05204.3|/1.04172e-41/OSJNBa0070C17.11 [Oryza sativa Japonica Group]
TCONS_00059822	up	2.24492	LOC_Os04g52260	up	4.95793	-	GO:0016023//cytoplasmic, membrane-bounded vesicle	-	-	gi|38568019|emb|CAE05204.3|/1.04172e-41/OSJNBa0070C17.11 [Oryza sativa Japonica Group]
TCONS_00059822	up	2.24492	LOC_Os11g26780	up	4.92048	-	-	-	GO:0050896//response to stimulus	gi|122207813|sp|Q2R4Z5.1|DH16B_ORYSJ/1.42691e-45/RecName: Full=Dehydrin Rab16B
TCONS_00008924	up	2.83107	LOC_Os11g26780	up	4.92048	-	-	-	GO:0050896//response to stimulus	gi|122207813|sp|Q2R4Z5.1|DH16B_ORYSJ/1.42691e-45/RecName: Full=Dehydrin Rab16B
TCONS_00091345	up	2.80973	LOC_Os11g26780	up	4.92048	-	-	-	GO:0050896//response to stimulus	gi|122207813|sp|Q2R4Z5.1|DH16B_ORYSJ/1.42691e-45/RecName: Full=Dehydrin Rab16B
TCONS_00005781	up	3.08006	LOC_Os11g26780	up	4.92048	-	-	-	GO:0050896//response to stimulus	gi|122207813|sp|Q2R4Z5.1|DH16B_ORYSJ/1.42691e-45/RecName: Full=Dehydrin Rab16B
TCONS_00005792	up	2.63888	LOC_Os11g26780	up	4.92048	-	-	-	GO:0050896//response to stimulus	gi|122207813|sp|Q2R4Z5.1|DH16B_ORYSJ/1.42691e-45/RecName: Full=Dehydrin Rab16B
TCONS_00010868	up	2.63376	LOC_Os11g26780	up	4.92048	-	-	-	GO:0050896//response to stimulus	gi|122207813|sp|Q2R4Z5.1|DH16B_ORYSJ/1.42691e-45/RecName: Full=Dehydrin Rab16B
TCONS_00056787	up	2.47695	LOC_Os11g26780	up	4.92048	-	-	-	GO:0050896//response to stimulus	gi|122207813|sp|Q2R4Z5.1|DH16B_ORYSJ/1.42691e-45/RecName: Full=Dehydrin Rab16B
TCONS_00065705	up	2.64989	LOC_Os01g12420	up	4.83141	ko05142//Chagas disease (American trypanosomiasis);ko05133//Pertussis;ko05145//Toxoplasmosis;ko04626//Plant-pathogen interaction;ko04075//Plant hormone signal transduction;ko04722//Neurotrophin signaling pathway;ko05162//Measles;ko04620//Toll-like receptor signaling pathway;ko05164//Influenza A;ko05140//Leishmaniasis;ko05152//Tuberculosis;ko04064//NF-kappa B signaling pathway;ko04210//Apoptosis	GO:0016021//integral component of membrane;GO:0016023//cytoplasmic, membrane-bounded vesicle;GO:0005886//plasma membrane	GO:0004674//protein serine/threonine kinase activity;GO:0005524//ATP binding	GO:0006468//protein phosphorylation;GO:0048544//recognition of pollen	gi|113531979|dbj|BAF04362.1|/0/Os01g0223900 [Oryza sativa Japonica Group]
TCONS_00089479	up	3.07091	LOC_Os01g12420	up	4.83141	ko05142//Chagas disease (American trypanosomiasis);ko05133//Pertussis;ko05145//Toxoplasmosis;ko04626//Plant-pathogen interaction;ko04075//Plant hormone signal transduction;ko04722//Neurotrophin signaling pathway;ko05162//Measles;ko04620//Toll-like receptor signaling pathway;ko05164//Influenza A;ko05140//Leishmaniasis;ko05152//Tuberculosis;ko04064//NF-kappa B signaling pathway;ko04210//Apoptosis	GO:0016021//integral component of membrane;GO:0016023//cytoplasmic, membrane-bounded vesicle;GO:0005886//plasma membrane	GO:0004674//protein serine/threonine kinase activity;GO:0005524//ATP binding	GO:0006468//protein phosphorylation;GO:0048544//recognition of pollen	gi|113531979|dbj|BAF04362.1|/0/Os01g0223900 [Oryza sativa Japonica Group]
TCONS_00070703	up	3.1046	LOC_Os06g01966	up	4.78643	-	GO:0005886//plasma membrane;GO:0016021//integral component of membrane;GO:0016023//cytoplasmic, membrane-bounded vesicle	GO:0022857//transmembrane transporter activity	GO:0055085//transmembrane transport	gi|113594614|dbj|BAF18488.1|/0/Os06g0109200 [Oryza sativa Japonica Group]
TCONS_00089479	up	3.07091	LOC_Os01g03680	up	4.76984	-	GO:0005576//extracellular region;GO:0016023//cytoplasmic, membrane-bounded vesicle	GO:0004867//serine-type endopeptidase inhibitor activity	GO:0010951//negative regulation of endopeptidase activity	gi|113531436|dbj|BAF03819.1|/2.19552e-115/Os01g0127600 [Oryza sativa Japonica Group]
TCONS_00065705	up	2.64989	LOC_Os01g03680	up	4.76984	-	GO:0005576//extracellular region;GO:0016023//cytoplasmic, membrane-bounded vesicle	GO:0004867//serine-type endopeptidase inhibitor activity	GO:0010951//negative regulation of endopeptidase activity	gi|113531436|dbj|BAF03819.1|/2.19552e-115/Os01g0127600 [Oryza sativa Japonica Group]
TCONS_00059822	up	2.24492	LOC_Os05g24770	up	4.7197	ko00740//Riboflavin metabolism;ko01100//Metabolic pathways;ko00100//Steroid biosynthesis	GO:0016021//integral component of membrane;GO:0005789//endoplasmic reticulum membrane	-	-	gi|113578715|dbj|BAF17078.1|/3.19583e-160/Os05g0312500 [Oryza sativa Japonica Group]
TCONS_00008924	up	2.83107	LOC_Os05g24770	up	4.7197	ko00740//Riboflavin metabolism;ko01100//Metabolic pathways;ko00100//Steroid biosynthesis	GO:0016021//integral component of membrane;GO:0005789//endoplasmic reticulum membrane	-	-	gi|113578715|dbj|BAF17078.1|/3.19583e-160/Os05g0312500 [Oryza sativa Japonica Group]
TCONS_00091345	up	2.80973	LOC_Os05g24770	up	4.7197	ko00740//Riboflavin metabolism;ko01100//Metabolic pathways;ko00100//Steroid biosynthesis	GO:0016021//integral component of membrane;GO:0005789//endoplasmic reticulum membrane	-	-	gi|113578715|dbj|BAF17078.1|/3.19583e-160/Os05g0312500 [Oryza sativa Japonica Group]
TCONS_00005781	up	3.08006	LOC_Os05g24770	up	4.7197	ko00740//Riboflavin metabolism;ko01100//Metabolic pathways;ko00100//Steroid biosynthesis	GO:0016021//integral component of membrane;GO:0005789//endoplasmic reticulum membrane	-	-	gi|113578715|dbj|BAF17078.1|/3.19583e-160/Os05g0312500 [Oryza sativa Japonica Group]
TCONS_00010868	up	2.63376	LOC_Os05g24770	up	4.7197	ko00740//Riboflavin metabolism;ko01100//Metabolic pathways;ko00100//Steroid biosynthesis	GO:0016021//integral component of membrane;GO:0005789//endoplasmic reticulum membrane	-	-	gi|113578715|dbj|BAF17078.1|/3.19583e-160/Os05g0312500 [Oryza sativa Japonica Group]
TCONS_00056787	up	2.47695	LOC_Os05g24770	up	4.7197	ko00740//Riboflavin metabolism;ko01100//Metabolic pathways;ko00100//Steroid biosynthesis	GO:0016021//integral component of membrane;GO:0005789//endoplasmic reticulum membrane	-	-	gi|113578715|dbj|BAF17078.1|/3.19583e-160/Os05g0312500 [Oryza sativa Japonica Group]
TCONS_00009514	up	7.62476	LOC_Os02g48570	up	4.68859	-	GO:0016021//integral component of membrane	GO:0005215//transporter activity	GO:0006810//transport	gi|42408043|dbj|BAD09179.1|/0/peptide transporter-like [Oryza sativa Japonica Group]
TCONS_00008316	up	6.93456	LOC_Os02g48570	up	4.68859	-	GO:0016021//integral component of membrane	GO:0005215//transporter activity	GO:0006810//transport	gi|42408043|dbj|BAD09179.1|/0/peptide transporter-like [Oryza sativa Japonica Group]
TCONS_00081336	up	7.85557	LOC_Os09g39890	up	4.68477	-	-	-	-	gi|108864290|gb|ABA92873.2|/0/retrotransposon protein, putative, unclassified [Oryza sativa Japonica Group]
TCONS_00089479	up	3.07091	LOC_Os02g37800	up	4.62326	ko00564//Glycerophospholipid metabolism;ko04142//Lysosome	-	GO:0008374//O-acyltransferase activity	GO:0006629//lipid metabolic process	gi|113536815|dbj|BAF09198.1|/0/Os02g0590400 [Oryza sativa Japonica Group]
TCONS_00065705	up	2.64989	LOC_Os02g37800	up	4.62326	ko00564//Glycerophospholipid metabolism;ko04142//Lysosome	-	GO:0008374//O-acyltransferase activity	GO:0006629//lipid metabolic process	gi|113536815|dbj|BAF09198.1|/0/Os02g0590400 [Oryza sativa Japonica Group]
TCONS_00059316	up	2.2842	LOC_Os03g50490	up	4.61068	ko00521//Streptomycin biosynthesis;ko00790//Folate biosynthesis;ko04727//GABAergic synapse;ko00910//Nitrogen metabolism;ko00330//Arginine and proline metabolism;ko04724//Glutamatergic synapse;ko01120//Microbial metabolism in diverse environments;ko01100//Metabolic pathways;ko00523//Polyketide sugar unit biosynthesis;ko02020//Two-component system;ko02010//ABC transporters;ko00630//Glyoxylate and d…	GO:0009507//chloroplast	GO:0005524//ATP binding;GO:0004356//glutamate-ammonia ligase activity	GO:0009399//nitrogen fixation;GO:0006542//glutamine biosynthetic process	gi|75317706|sp|Q4W8D0.1|GLN13_ORYSJ/0/RecName: Full=Glutamine synthetase cytosolic isozyme 1-3; AltName: Full=Glutamate--ammonia ligase GLN1;3; Short=OsGLN1;3; AltName: Full=OsGS1;3
TCONS_00059822	up	2.24492	LOC_Os03g55340	up	4.59559	-	-	-	-	gi|113549823|dbj|BAF13266.1|/0/Os03g0761300 [Oryza sativa Japonica Group]
TCONS_00008924	up	2.83107	LOC_Os03g55340	up	4.59559	-	-	-	-	gi|113549823|dbj|BAF13266.1|/0/Os03g0761300 [Oryza sativa Japonica Group]
TCONS_00091345	up	2.80973	LOC_Os03g55340	up	4.59559	-	-	-	-	gi|113549823|dbj|BAF13266.1|/0/Os03g0761300 [Oryza sativa Japonica Group]
TCONS_00005781	up	3.08006	LOC_Os03g55340	up	4.59559	-	-	-	-	gi|113549823|dbj|BAF13266.1|/0/Os03g0761300 [Oryza sativa Japonica Group]
TCONS_00005792	up	2.63888	LOC_Os03g55340	up	4.59559	-	-	-	-	gi|113549823|dbj|BAF13266.1|/0/Os03g0761300 [Oryza sativa Japonica Group]
TCONS_00010868	up	2.63376	LOC_Os03g55340	up	4.59559	-	-	-	-	gi|113549823|dbj|BAF13266.1|/0/Os03g0761300 [Oryza sativa Japonica Group]
TCONS_00056787	up	2.47695	LOC_Os03g55340	up	4.59559	-	-	-	-	gi|113549823|dbj|BAF13266.1|/0/Os03g0761300 [Oryza sativa Japonica Group]
TCONS_00008316	up	6.93456	LOC_Os07g34006	up	4.50196	-	GO:0016021//integral component of membrane	GO:0005215//transporter activity	GO:0034219//carbohydrate transmembrane transport	gi|28564759|dbj|BAC57673.1|/0/putative glucose-6-phosphate/phosphate- translocator precursor [Oryza sativa Japonica Group]
TCONS_00008924	up	2.83107	LOC_Os07g34006	up	4.50196	-	GO:0016021//integral component of membrane	GO:0005215//transporter activity	GO:0034219//carbohydrate transmembrane transport	gi|28564759|dbj|BAC57673.1|/0/putative glucose-6-phosphate/phosphate- translocator precursor [Oryza sativa Japonica Group]
TCONS_00091345	up	2.80973	LOC_Os07g34006	up	4.50196	-	GO:0016021//integral component of membrane	GO:0005215//transporter activity	GO:0034219//carbohydrate transmembrane transport	gi|28564759|dbj|BAC57673.1|/0/putative glucose-6-phosphate/phosphate- translocator precursor [Oryza sativa Japonica Group]
TCONS_00005781	up	3.08006	LOC_Os07g34006	up	4.50196	-	GO:0016021//integral component of membrane	GO:0005215//transporter activity	GO:0034219//carbohydrate transmembrane transport	gi|28564759|dbj|BAC57673.1|/0/putative glucose-6-phosphate/phosphate- translocator precursor [Oryza sativa Japonica Group]
TCONS_00010868	up	2.63376	LOC_Os07g34006	up	4.50196	-	GO:0016021//integral component of membrane	GO:0005215//transporter activity	GO:0034219//carbohydrate transmembrane transport	gi|28564759|dbj|BAC57673.1|/0/putative glucose-6-phosphate/phosphate- translocator precursor [Oryza sativa Japonica Group]
TCONS_00059822	up	2.24492	LOC_Os07g34006	up	4.50196	-	GO:0016021//integral component of membrane	GO:0005215//transporter activity	GO:0034219//carbohydrate transmembrane transport	gi|28564759|dbj|BAC57673.1|/0/putative glucose-6-phosphate/phosphate- translocator precursor [Oryza sativa Japonica Group]
TCONS_00081336	up	7.85557	LOC_Os04g06230	up	4.45676	-	-	-	-	gi|38346267|emb|CAE02087.2|/0/OSJNBa0074B10.17 [Oryza sativa Japonica Group]
TCONS_00059316	up	2.2842	LOC_Os04g06230	up	4.45676	-	-	-	-	gi|38346267|emb|CAE02087.2|/0/OSJNBa0074B10.17 [Oryza sativa Japonica Group]
TCONS_00081336	up	7.85557	LOC_Os07g20430	up	4.42891	-	GO:0016020//membrane	GO:0008270//zinc ion binding;GO:0003676//nucleic acid binding	-	gi|62701678|gb|AAX92751.1|/0/transposon protein, putative, mutator sub-class [Oryza sativa Japonica Group]
TCONS_00056787	up	2.47695	LOC_Os03g55090	up	4.40553	ko00500//Starch and sucrose metabolism;ko04910//Insulin signaling pathway	GO:0009570//chloroplast stroma	GO:0008184//glycogen phosphorylase activity;GO:0030170//pyridoxal phosphate binding	GO:0005980//glycogen catabolic process;GO:0009414//response to water deprivation	gi|190689248|dbj|BAG49328.1|/0/plastidial starch phosphorylase 1 [Oryza sativa Japonica Group]
TCONS_00081336	up	7.85557	LOC_Os03g04080	up	4.35753	-	-	-	-	gi|108706035|gb|ABF93830.1|/6.95655e-79/expressed protein [Oryza sativa Japonica Group]
TCONS_00065705	up	2.64989	LOC_Os12g26290	up	4.32999	ko00592//alpha-Linolenic acid metabolism	-	GO:0020037//heme binding;GO:0046872//metal ion binding;GO:0004601//peroxidase activity;GO:0051213//dioxygenase activity	GO:0098869//cellular oxidant detoxification;GO:0055114//oxidation-reduction process;GO:0006979//response to oxidative stress	gi|1002314022|ref|XP_015620387.1|;gi|108862637|gb|ABG22012.1|;gi|133761837|gb|AAF64042.2|AF229813_1;gi|532137998|pdb|4KVJ|A;gi|108862638|gb|ABG22013.1|/0;0;0;0;0/PREDICTED: alpha-dioxygenase 1 isoform X2 [Oryza sativa Japonica Group];alpha-dioxygenase, putative, expressed [Oryza sativa Japonica Group];fatty acid alpha-oxidase [Oryza sativa];Chain A, Crystal Structure Of Oryza Sativa Fatty Acid Al…
TCONS_00089479	up	3.07091	LOC_Os12g26290	up	4.32999	ko00592//alpha-Linolenic acid metabolism	-	GO:0020037//heme binding;GO:0046872//metal ion binding;GO:0004601//peroxidase activity;GO:0051213//dioxygenase activity	GO:0098869//cellular oxidant detoxification;GO:0055114//oxidation-reduction process;GO:0006979//response to oxidative stress	gi|1002314022|ref|XP_015620387.1|;gi|108862637|gb|ABG22012.1|;gi|133761837|gb|AAF64042.2|AF229813_1;gi|532137998|pdb|4KVJ|A;gi|108862638|gb|ABG22013.1|/0;0;0;0;0/PREDICTED: alpha-dioxygenase 1 isoform X2 [Oryza sativa Japonica Group];alpha-dioxygenase, putative, expressed [Oryza sativa Japonica Group];fatty acid alpha-oxidase [Oryza sativa];Chain A, Crystal Structure Of Oryza Sativa Fatty Acid Al…
TCONS_00065705	up	2.64989	LOC_Os03g14250	up	4.29859	-	-	-	-	gi|108707154|gb|ABF94949.1|/0/expressed protein [Oryza sativa Japonica Group]
TCONS_00089479	up	3.07091	LOC_Os03g14250	up	4.29859	-	-	-	-	gi|108707154|gb|ABF94949.1|/0/expressed protein [Oryza sativa Japonica Group]
TCONS_00065705	up	2.64989	LOC_Os11g10860	up	4.25616	-	GO:0005739//mitochondrion;GO:0005634//nucleus	GO:0008234//cysteine-type peptidase activity;GO:0003677//DNA binding;GO:0046983//protein dimerization activity	GO:0006355//regulation of transcription, DNA-templated;GO:0006508//proteolysis	gi|77549348|gb|ABA92145.1|/0/transposon protein, putative, CACTA, En/Spm sub-class [Oryza sativa Japonica Group]
TCONS_00091345	up	2.80973	LOC_Os01g28840	up	4.24813	-	GO:0016021//integral component of membrane	-	GO:0055085//transmembrane transport	gi|21743361|dbj|BAC03353.1|/0/C4-dicarboxylate transporter-like protein [Oryza sativa Japonica Group]
TCONS_00056787	up	2.47695	LOC_Os01g28840	up	4.24813	-	GO:0016021//integral component of membrane	-	GO:0055085//transmembrane transport	gi|21743361|dbj|BAC03353.1|/0/C4-dicarboxylate transporter-like protein [Oryza sativa Japonica Group]
TCONS_00059822	up	2.24492	LOC_Os01g28840	up	4.24813	-	GO:0016021//integral component of membrane	-	GO:0055085//transmembrane transport	gi|21743361|dbj|BAC03353.1|/0/C4-dicarboxylate transporter-like protein [Oryza sativa Japonica Group]
TCONS_00009514	up	7.62476	LOC_Os03g04190	up	4.23904	ko00941//Flavonoid biosynthesis;ko00624//Polycyclic aromatic hydrocarbon degradation;ko00903//Limonene and pinene degradation;ko01120//Microbial metabolism in diverse environments;ko01100//Metabolic pathways;ko00627//Aminobenzoate degradation;ko00945//Stilbenoid, diarylheptanoid and gingerol biosynthesis;ko00363//Bisphenol degradation;ko01110//Biosynthesis of secondary metabolites;ko00944//Flavon…	GO:0016021//integral component of membrane	GO:0016709//oxidoreductase activity, acting on paired donors, with incorporation or reduction of molecular oxygen, NAD(P)H as one donor, and incorporation of one atom of oxygen;GO:0020037//heme binding;GO:0005506//iron ion binding	GO:0044550//secondary metabolite biosynthetic process;GO:0055114//oxidation-reduction process	gi|937907248|dbj|BAS82168.1|/0/Os03g0134500 [Oryza sativa Japonica Group]
TCONS_00059822	up	2.24492	LOC_Os03g04190	up	4.23904	ko00941//Flavonoid biosynthesis;ko00624//Polycyclic aromatic hydrocarbon degradation;ko00903//Limonene and pinene degradation;ko01120//Microbial metabolism in diverse environments;ko01100//Metabolic pathways;ko00627//Aminobenzoate degradation;ko00945//Stilbenoid, diarylheptanoid and gingerol biosynthesis;ko00363//Bisphenol degradation;ko01110//Biosynthesis of secondary metabolites;ko00944//Flavon…	GO:0016021//integral component of membrane	GO:0016709//oxidoreductase activity, acting on paired donors, with incorporation or reduction of molecular oxygen, NAD(P)H as one donor, and incorporation of one atom of oxygen;GO:0020037//heme binding;GO:0005506//iron ion binding	GO:0044550//secondary metabolite biosynthetic process;GO:0055114//oxidation-reduction process	gi|937907248|dbj|BAS82168.1|/0/Os03g0134500 [Oryza sativa Japonica Group]
TCONS_00008316	up	6.93456	LOC_Os03g04190	up	4.23904	ko00941//Flavonoid biosynthesis;ko00624//Polycyclic aromatic hydrocarbon degradation;ko00903//Limonene and pinene degradation;ko01120//Microbial metabolism in diverse environments;ko01100//Metabolic pathways;ko00627//Aminobenzoate degradation;ko00945//Stilbenoid, diarylheptanoid and gingerol biosynthesis;ko00363//Bisphenol degradation;ko01110//Biosynthesis of secondary metabolites;ko00944//Flavon…	GO:0016021//integral component of membrane	GO:0016709//oxidoreductase activity, acting on paired donors, with incorporation or reduction of molecular oxygen, NAD(P)H as one donor, and incorporation of one atom of oxygen;GO:0020037//heme binding;GO:0005506//iron ion binding	GO:0044550//secondary metabolite biosynthetic process;GO:0055114//oxidation-reduction process	gi|937907248|dbj|BAS82168.1|/0/Os03g0134500 [Oryza sativa Japonica Group]
TCONS_00005781	up	3.08006	LOC_Os03g04190	up	4.23904	ko00941//Flavonoid biosynthesis;ko00624//Polycyclic aromatic hydrocarbon degradation;ko00903//Limonene and pinene degradation;ko01120//Microbial metabolism in diverse environments;ko01100//Metabolic pathways;ko00627//Aminobenzoate degradation;ko00945//Stilbenoid, diarylheptanoid and gingerol biosynthesis;ko00363//Bisphenol degradation;ko01110//Biosynthesis of secondary metabolites;ko00944//Flavon…	GO:0016021//integral component of membrane	GO:0016709//oxidoreductase activity, acting on paired donors, with incorporation or reduction of molecular oxygen, NAD(P)H as one donor, and incorporation of one atom of oxygen;GO:0020037//heme binding;GO:0005506//iron ion binding	GO:0044550//secondary metabolite biosynthetic process;GO:0055114//oxidation-reduction process	gi|937907248|dbj|BAS82168.1|/0/Os03g0134500 [Oryza sativa Japonica Group]
TCONS_00009978	up	1.89024	LOC_Os06g11660	up	4.21995	-	GO:0016023//cytoplasmic, membrane-bounded vesicle	-	-	gi|1002279412|ref|XP_015644023.1|;gi|222635212|gb|EEE65344.1|/1.307e-172;1.81435e-108/PREDICTED: protein EXORDIUM [Oryza sativa Japonica Group];hypothetical protein OsJ_20619 [Oryza sativa Japonica Group]
TCONS_00065705	up	2.64989	LOC_Os06g11660	up	4.21995	-	GO:0016023//cytoplasmic, membrane-bounded vesicle	-	-	gi|1002279412|ref|XP_015644023.1|;gi|222635212|gb|EEE65344.1|/1.307e-172;1.81435e-108/PREDICTED: protein EXORDIUM [Oryza sativa Japonica Group];hypothetical protein OsJ_20619 [Oryza sativa Japonica Group]
TCONS_00065705	up	2.64989	LOC_Os02g12680	up	4.19762	ko00592//alpha-Linolenic acid metabolism;ko01100//Metabolic pathways	-	GO:0047987//hydroperoxide dehydratase activity;GO:0004497//monooxygenase activity;GO:0005506//iron ion binding;GO:0020037//heme binding;GO:0016705//oxidoreductase activity, acting on paired donors, with incorporation or reduction of molecular oxygen	GO:0031408//oxylipin biosynthetic process;GO:0016125//sterol metabolic process;GO:0055114//oxidation-reduction process	gi|73619654|sp|Q6Z6L1.1|C74A3_ORYSJ/0/RecName: Full=Allene oxide synthase 3; AltName: Full=Cytochrome P450 74A3; AltName: Full=Hydroperoxide dehydrase 3
TCONS_00089479	up	3.07091	LOC_Os02g12680	up	4.19762	ko00592//alpha-Linolenic acid metabolism;ko01100//Metabolic pathways	-	GO:0047987//hydroperoxide dehydratase activity;GO:0004497//monooxygenase activity;GO:0005506//iron ion binding;GO:0020037//heme binding;GO:0016705//oxidoreductase activity, acting on paired donors, with incorporation or reduction of molecular oxygen	GO:0031408//oxylipin biosynthetic process;GO:0016125//sterol metabolic process;GO:0055114//oxidation-reduction process	gi|73619654|sp|Q6Z6L1.1|C74A3_ORYSJ/0/RecName: Full=Allene oxide synthase 3; AltName: Full=Cytochrome P450 74A3; AltName: Full=Hydroperoxide dehydrase 3
TCONS_00070703	up	3.1046	LOC_Os04g52250	up	4.18423	-	-	-	-	gi|38568018|emb|CAE05203.3|/1.13746e-46/OSJNBa0070C17.10 [Oryza sativa Japonica Group]
TCONS_00065705	up	2.64989	LOC_Os09g17660	up	4.1171	-	-	-	-	gi|255678809|dbj|BAH94518.1|/1.03167e-135/Os09g0345500 [Oryza sativa Japonica Group]
TCONS_00081336	up	7.85557	LOC_Os04g10980	up	4.10323	-	GO:0005739//mitochondrion;GO:0005634//nucleus	GO:0008234//cysteine-type peptidase activity;GO:0003677//DNA binding;GO:0046983//protein dimerization activity	GO:0006355//regulation of transcription, DNA-templated;GO:0006508//proteolysis	gi|108710048|gb|ABF97843.1|/0/transposon protein, putative, CACTA, En/Spm sub-class [Oryza sativa Japonica Group]
TCONS_00065705	up	2.64989	LOC_Os04g10980	up	4.10323	-	GO:0005739//mitochondrion;GO:0005634//nucleus	GO:0008234//cysteine-type peptidase activity;GO:0003677//DNA binding;GO:0046983//protein dimerization activity	GO:0006355//regulation of transcription, DNA-templated;GO:0006508//proteolysis	gi|108710048|gb|ABF97843.1|/0/transposon protein, putative, CACTA, En/Spm sub-class [Oryza sativa Japonica Group]
TCONS_00089479	up	3.07091	LOC_Os04g10980	up	4.10323	-	GO:0005739//mitochondrion;GO:0005634//nucleus	GO:0008234//cysteine-type peptidase activity;GO:0003677//DNA binding;GO:0046983//protein dimerization activity	GO:0006355//regulation of transcription, DNA-templated;GO:0006508//proteolysis	gi|108710048|gb|ABF97843.1|/0/transposon protein, putative, CACTA, En/Spm sub-class [Oryza sativa Japonica Group]
TCONS_00089479	up	3.07091	LOC_Os07g37730	up	4.09846	ko00564//Glycerophospholipid metabolism;ko00260//Glycine, serine and threonine metabolism;ko00061//Fatty acid biosynthesis;ko01120//Microbial metabolism in diverse environments;ko01100//Metabolic pathways;ko00640//Propanoate metabolism;ko02020//Two-component system;ko00620//Pyruvate metabolism;ko00190//Oxidative phosphorylation;ko01110//Biosynthesis of secondary metabolites	GO:0005739//mitochondrion	GO:0008137//NADH dehydrogenase (ubiquinone) activity	GO:0055114//oxidation-reduction process	gi|113611539|dbj|BAF21917.1|/0/Os07g0564500 [Oryza sativa Japonica Group]
TCONS_00065705	up	2.64989	LOC_Os07g37730	up	4.09846	ko00564//Glycerophospholipid metabolism;ko00260//Glycine, serine and threonine metabolism;ko00061//Fatty acid biosynthesis;ko01120//Microbial metabolism in diverse environments;ko01100//Metabolic pathways;ko00640//Propanoate metabolism;ko02020//Two-component system;ko00620//Pyruvate metabolism;ko00190//Oxidative phosphorylation;ko01110//Biosynthesis of secondary metabolites	GO:0005739//mitochondrion	GO:0008137//NADH dehydrogenase (ubiquinone) activity	GO:0055114//oxidation-reduction process	gi|113611539|dbj|BAF21917.1|/0/Os07g0564500 [Oryza sativa Japonica Group]
TCONS_00056787	up	2.47695	LOC_Os07g33910	up	4.09259	-	GO:0016021//integral component of membrane	GO:0005215//transporter activity	GO:0034219//carbohydrate transmembrane transport	gi|937926912|dbj|BAT01829.1|/2.8298e-141/Os07g0523400 [Oryza sativa Japonica Group]
TCONS_00009514	up	7.62476	LOC_Os10g35460	up	4.07346	-	GO:0005886//plasma membrane;GO:0031225//anchored component of membrane;GO:0016021//integral component of membrane;GO:0016023//cytoplasmic, membrane-bounded vesicle	-	GO:0010215//cellulose microfibril organization;GO:0016049//cell growth	gi|75162257|sp|Q8W3E8.1|COBL4_ORYSJ/0/RecName: Full=COBRA-like protein 4; AltName: Full=Protein BRITTLE CULM1-like 9; Flags: Precursor
TCONS_00008316	up	6.93456	LOC_Os10g35460	up	4.07346	-	GO:0005886//plasma membrane;GO:0031225//anchored component of membrane;GO:0016021//integral component of membrane;GO:0016023//cytoplasmic, membrane-bounded vesicle	-	GO:0010215//cellulose microfibril organization;GO:0016049//cell growth	gi|75162257|sp|Q8W3E8.1|COBL4_ORYSJ/0/RecName: Full=COBRA-like protein 4; AltName: Full=Protein BRITTLE CULM1-like 9; Flags: Precursor
TCONS_00070703	up	3.1046	LOC_Os08g04540	up	4.05125	ko01100//Metabolic pathways;ko00950//Isoquinoline alkaloid biosynthesis;ko00350//Tyrosine metabolism;ko01110//Biosynthesis of secondary metabolites	-	GO:0030170//pyridoxal phosphate binding;GO:0016831//carboxy-lyase activity	GO:0006520//cellular amino acid metabolic process	gi|113622937|dbj|BAF22882.1|/0/Os08g0140300 [Oryza sativa Japonica Group]
TCONS_00059822	up	2.24492	LOC_Os03g56060	up	4.04663	-	GO:0016021//integral component of membrane;GO:0000139//Golgi membrane	GO:0016757//transferase activity, transferring glycosyl groups	GO:0071555//cell wall organization	gi|108711292|gb|ABF99087.1|/0/glycosyl transferase, group 2 family protein, expressed [Oryza sativa Japonica Group]
TCONS_00008924	up	2.83107	LOC_Os03g56060	up	4.04663	-	GO:0016021//integral component of membrane;GO:0000139//Golgi membrane	GO:0016757//transferase activity, transferring glycosyl groups	GO:0071555//cell wall organization	gi|108711292|gb|ABF99087.1|/0/glycosyl transferase, group 2 family protein, expressed [Oryza sativa Japonica Group]
TCONS_00091345	up	2.80973	LOC_Os03g56060	up	4.04663	-	GO:0016021//integral component of membrane;GO:0000139//Golgi membrane	GO:0016757//transferase activity, transferring glycosyl groups	GO:0071555//cell wall organization	gi|108711292|gb|ABF99087.1|/0/glycosyl transferase, group 2 family protein, expressed [Oryza sativa Japonica Group]
TCONS_00005792	up	2.63888	LOC_Os03g56060	up	4.04663	-	GO:0016021//integral component of membrane;GO:0000139//Golgi membrane	GO:0016757//transferase activity, transferring glycosyl groups	GO:0071555//cell wall organization	gi|108711292|gb|ABF99087.1|/0/glycosyl transferase, group 2 family protein, expressed [Oryza sativa Japonica Group]
TCONS_00010868	up	2.63376	LOC_Os03g56060	up	4.04663	-	GO:0016021//integral component of membrane;GO:0000139//Golgi membrane	GO:0016757//transferase activity, transferring glycosyl groups	GO:0071555//cell wall organization	gi|108711292|gb|ABF99087.1|/0/glycosyl transferase, group 2 family protein, expressed [Oryza sativa Japonica Group]
TCONS_00056787	up	2.47695	LOC_Os03g56060	up	4.04663	-	GO:0016021//integral component of membrane;GO:0000139//Golgi membrane	GO:0016757//transferase activity, transferring glycosyl groups	GO:0071555//cell wall organization	gi|108711292|gb|ABF99087.1|/0/glycosyl transferase, group 2 family protein, expressed [Oryza sativa Japonica Group]
TCONS_00059316	up	2.2842	LOC_Os03g56060	up	4.04663	-	GO:0016021//integral component of membrane;GO:0000139//Golgi membrane	GO:0016757//transferase activity, transferring glycosyl groups	GO:0071555//cell wall organization	gi|108711292|gb|ABF99087.1|/0/glycosyl transferase, group 2 family protein, expressed [Oryza sativa Japonica Group]
TCONS_00008924	up	2.83107	LOC_Os04g06590	up	3.96772	-	GO:0016021//integral component of membrane;GO:0016023//cytoplasmic, membrane-bounded vesicle	-	-	gi|1002265641|ref|XP_015637155.1|/0/PREDICTED: uncharacterized protein LOC4335022 [Oryza sativa Japonica Group]
TCONS_00091345	up	2.80973	LOC_Os04g06590	up	3.96772	-	GO:0016021//integral component of membrane;GO:0016023//cytoplasmic, membrane-bounded vesicle	-	-	gi|1002265641|ref|XP_015637155.1|/0/PREDICTED: uncharacterized protein LOC4335022 [Oryza sativa Japonica Group]
TCONS_00010868	up	2.63376	LOC_Os04g06590	up	3.96772	-	GO:0016021//integral component of membrane;GO:0016023//cytoplasmic, membrane-bounded vesicle	-	-	gi|1002265641|ref|XP_015637155.1|/0/PREDICTED: uncharacterized protein LOC4335022 [Oryza sativa Japonica Group]
TCONS_00059822	up	2.24492	LOC_Os04g06590	up	3.96772	-	GO:0016021//integral component of membrane;GO:0016023//cytoplasmic, membrane-bounded vesicle	-	-	gi|1002265641|ref|XP_015637155.1|/0/PREDICTED: uncharacterized protein LOC4335022 [Oryza sativa Japonica Group]
TCONS_00008316	up	6.93456	LOC_Os03g07180	up	3.96296	-	GO:0016023//cytoplasmic, membrane-bounded vesicle	-	-	gi|108706383|gb|ABF94178.1|;gi|222624261|gb|EEE58393.1|/1.34282e-24;1.87398e-24/Late embryogenesis abundant protein, expressed [Oryza sativa Japonica Group];hypothetical protein OsJ_09557 [Oryza sativa Japonica Group]
TCONS_00008924	up	2.83107	LOC_Os03g07180	up	3.96296	-	GO:0016023//cytoplasmic, membrane-bounded vesicle	-	-	gi|108706383|gb|ABF94178.1|;gi|222624261|gb|EEE58393.1|/1.34282e-24;1.87398e-24/Late embryogenesis abundant protein, expressed [Oryza sativa Japonica Group];hypothetical protein OsJ_09557 [Oryza sativa Japonica Group]
TCONS_00091345	up	2.80973	LOC_Os03g07180	up	3.96296	-	GO:0016023//cytoplasmic, membrane-bounded vesicle	-	-	gi|108706383|gb|ABF94178.1|;gi|222624261|gb|EEE58393.1|/1.34282e-24;1.87398e-24/Late embryogenesis abundant protein, expressed [Oryza sativa Japonica Group];hypothetical protein OsJ_09557 [Oryza sativa Japonica Group]
TCONS_00005781	up	3.08006	LOC_Os03g07180	up	3.96296	-	GO:0016023//cytoplasmic, membrane-bounded vesicle	-	-	gi|108706383|gb|ABF94178.1|;gi|222624261|gb|EEE58393.1|/1.34282e-24;1.87398e-24/Late embryogenesis abundant protein, expressed [Oryza sativa Japonica Group];hypothetical protein OsJ_09557 [Oryza sativa Japonica Group]
TCONS_00010868	up	2.63376	LOC_Os03g07180	up	3.96296	-	GO:0016023//cytoplasmic, membrane-bounded vesicle	-	-	gi|108706383|gb|ABF94178.1|;gi|222624261|gb|EEE58393.1|/1.34282e-24;1.87398e-24/Late embryogenesis abundant protein, expressed [Oryza sativa Japonica Group];hypothetical protein OsJ_09557 [Oryza sativa Japonica Group]
TCONS_00059822	up	2.24492	LOC_Os03g07180	up	3.96296	-	GO:0016023//cytoplasmic, membrane-bounded vesicle	-	-	gi|108706383|gb|ABF94178.1|;gi|222624261|gb|EEE58393.1|/1.34282e-24;1.87398e-24/Late embryogenesis abundant protein, expressed [Oryza sativa Japonica Group];hypothetical protein OsJ_09557 [Oryza sativa Japonica Group]
TCONS_00081336	up	7.85557	LOC_Os01g04050	up	3.9408	-	GO:0016021//integral component of membrane;GO:0016023//cytoplasmic, membrane-bounded vesicle;GO:0005576//extracellular region	GO:0008233//peptidase activity;GO:0004867//serine-type endopeptidase inhibitor activity	GO:0010951//negative regulation of endopeptidase activity	gi|15887006|dbj|BAB69446.1|/1.11596e-57/wound induced protein homolog [Oryza sativa]
TCONS_00059316	up	2.2842	LOC_Os12g40810	up	3.93852	ko03440//Homologous recombination;ko00240//Pyrimidine metabolism;ko01100//Metabolic pathways;ko03460//Fanconi anemia pathway;ko02020//Two-component system;ko02010//ABC transporters;ko00670//One carbon pool by folate	GO:0009536//plastid	GO:0004523//RNA-DNA hybrid ribonuclease activity;GO:0003964//RNA-directed DNA polymerase activity;GO:0003677//DNA binding;GO:0003723//RNA binding	GO:0090502//RNA phosphodiester bond hydrolysis, endonucleolytic;GO:0006278//RNA-dependent DNA biosynthetic process;GO:0015074//DNA integration;GO:0006310//DNA recombination	gi|77556987|gb|ABA99783.1|/0/retrotransposon protein, putative, unclassified [Oryza sativa Japonica Group]
TCONS_00059822	up	2.24492	LOC_Os01g04160	up	3.92951	-	-	-	-	gi|1002226262|ref|XP_015625985.1|/0/PREDICTED: uncharacterized protein LOC4325802 [Oryza sativa Japonica Group]
TCONS_00008924	up	2.83107	LOC_Os01g04160	up	3.92951	-	-	-	-	gi|1002226262|ref|XP_015625985.1|/0/PREDICTED: uncharacterized protein LOC4325802 [Oryza sativa Japonica Group]
TCONS_00091345	up	2.80973	LOC_Os01g04160	up	3.92951	-	-	-	-	gi|1002226262|ref|XP_015625985.1|/0/PREDICTED: uncharacterized protein LOC4325802 [Oryza sativa Japonica Group]
TCONS_00005781	up	3.08006	LOC_Os01g04160	up	3.92951	-	-	-	-	gi|1002226262|ref|XP_015625985.1|/0/PREDICTED: uncharacterized protein LOC4325802 [Oryza sativa Japonica Group]
TCONS_00010868	up	2.63376	LOC_Os01g04160	up	3.92951	-	-	-	-	gi|1002226262|ref|XP_015625985.1|/0/PREDICTED: uncharacterized protein LOC4325802 [Oryza sativa Japonica Group]
TCONS_00065705	up	2.64989	LOC_Os02g02230	up	3.91704	ko01100//Metabolic pathways;ko00100//Steroid biosynthesis;ko01110//Biosynthesis of secondary metabolites	GO:0005886//plasma membrane;GO:0005783//endoplasmic reticulum	GO:0008398//sterol 14-demethylase activity;GO:0046872//metal ion binding	GO:0016126//sterol biosynthetic process	gi|255670543|dbj|BAF07575.2|/0/Os02g0113200 [Oryza sativa Japonica Group]
TCONS_00089479	up	3.07091	LOC_Os02g02230	up	3.91704	ko01100//Metabolic pathways;ko00100//Steroid biosynthesis;ko01110//Biosynthesis of secondary metabolites	GO:0005886//plasma membrane;GO:0005783//endoplasmic reticulum	GO:0008398//sterol 14-demethylase activity;GO:0046872//metal ion binding	GO:0016126//sterol biosynthetic process	gi|255670543|dbj|BAF07575.2|/0/Os02g0113200 [Oryza sativa Japonica Group]
TCONS_00089479	up	3.07091	LOC_Os05g12040	up	3.90026	ko01100//Metabolic pathways;ko00100//Steroid biosynthesis;ko01110//Biosynthesis of secondary metabolites	GO:0005886//plasma membrane;GO:0005783//endoplasmic reticulum	GO:0008398//sterol 14-demethylase activity;GO:0005506//iron ion binding;GO:0020037//heme binding	GO:0070988//demethylation;GO:0016126//sterol biosynthetic process;GO:0055114//oxidation-reduction process	gi|1002267674|ref|XP_015638157.1|/0/PREDICTED: obtusifoliol 14-alpha demethylase [Oryza sativa Japonica Group]
TCONS_00065705	up	2.64989	LOC_Os05g12040	up	3.90026	ko01100//Metabolic pathways;ko00100//Steroid biosynthesis;ko01110//Biosynthesis of secondary metabolites	GO:0005886//plasma membrane;GO:0005783//endoplasmic reticulum	GO:0008398//sterol 14-demethylase activity;GO:0005506//iron ion binding;GO:0020037//heme binding	GO:0070988//demethylation;GO:0016126//sterol biosynthetic process;GO:0055114//oxidation-reduction process	gi|1002267674|ref|XP_015638157.1|/0/PREDICTED: obtusifoliol 14-alpha demethylase [Oryza sativa Japonica Group]
TCONS_00089479	up	3.07091	LOC_Os07g03710	up	3.90007	ko04626//Plant-pathogen interaction;ko04075//Plant hormone signal transduction	GO:0005576//extracellular region;GO:0016023//cytoplasmic, membrane-bounded vesicle	-	-	gi|937924997|dbj|BAS99913.1|/1.00022e-91/Os07g0129200, partial [Oryza sativa Japonica Group]
TCONS_00065705	up	2.64989	LOC_Os07g03710	up	3.90007	ko04626//Plant-pathogen interaction;ko04075//Plant hormone signal transduction	GO:0005576//extracellular region;GO:0016023//cytoplasmic, membrane-bounded vesicle	-	-	gi|937924997|dbj|BAS99913.1|/1.00022e-91/Os07g0129200, partial [Oryza sativa Japonica Group]
TCONS_00081336	up	7.85557	LOC_Os01g72270	up	3.89102	ko00624//Polycyclic aromatic hydrocarbon degradation;ko00903//Limonene and pinene degradation;ko00073//Cutin, suberine and wax biosynthesis;ko01120//Microbial metabolism in diverse environments;ko01100//Metabolic pathways;ko00627//Aminobenzoate degradation;ko00945//Stilbenoid, diarylheptanoid and gingerol biosynthesis;ko00363//Bisphenol degradation;ko01110//Biosynthesis of secondary metabolites	GO:0016023//cytoplasmic, membrane-bounded vesicle	GO:0005488;GO:0016491//oxidoreductase activity	-	gi|19386832|dbj|BAB86210.1|/0/putative cytochrome P450-dependent fatty acid hydroxylase [Oryza sativa Japonica Group]
TCONS_00059316	up	2.2842	LOC_Os01g72270	up	3.89102	ko00624//Polycyclic aromatic hydrocarbon degradation;ko00903//Limonene and pinene degradation;ko00073//Cutin, suberine and wax biosynthesis;ko01120//Microbial metabolism in diverse environments;ko01100//Metabolic pathways;ko00627//Aminobenzoate degradation;ko00945//Stilbenoid, diarylheptanoid and gingerol biosynthesis;ko00363//Bisphenol degradation;ko01110//Biosynthesis of secondary metabolites	GO:0016023//cytoplasmic, membrane-bounded vesicle	GO:0005488;GO:0016491//oxidoreductase activity	-	gi|19386832|dbj|BAB86210.1|/0/putative cytochrome P450-dependent fatty acid hydroxylase [Oryza sativa Japonica Group]
TCONS_00008924	up	2.83107	LOC_Os03g22210	up	3.89102	-	GO:0016023//cytoplasmic, membrane-bounded vesicle	-	-	gi|108708069|gb|ABF95864.1|/9.37861e-75/expressed protein [Oryza sativa Japonica Group]
TCONS_00091345	up	2.80973	LOC_Os03g22210	up	3.89102	-	GO:0016023//cytoplasmic, membrane-bounded vesicle	-	-	gi|108708069|gb|ABF95864.1|/9.37861e-75/expressed protein [Oryza sativa Japonica Group]
TCONS_00059822	up	2.24492	LOC_Os03g22210	up	3.89102	-	GO:0016023//cytoplasmic, membrane-bounded vesicle	-	-	gi|108708069|gb|ABF95864.1|/9.37861e-75/expressed protein [Oryza sativa Japonica Group]
TCONS_00005781	up	3.08006	LOC_Os03g22210	up	3.89102	-	GO:0016023//cytoplasmic, membrane-bounded vesicle	-	-	gi|108708069|gb|ABF95864.1|/9.37861e-75/expressed protein [Oryza sativa Japonica Group]
TCONS_00010868	up	2.63376	LOC_Os03g22210	up	3.89102	-	GO:0016023//cytoplasmic, membrane-bounded vesicle	-	-	gi|108708069|gb|ABF95864.1|/9.37861e-75/expressed protein [Oryza sativa Japonica Group]
TCONS_00008924	up	2.83107	LOC_Os10g25090	up	3.88245	ko04626//Plant-pathogen interaction	GO:0016021//integral component of membrane	GO:0004672//protein kinase activity;GO:0005524//ATP binding	GO:0006468//protein phosphorylation	gi|113639111|dbj|BAF26416.1|/0/Os10g0389800 [Oryza sativa Japonica Group]
TCONS_00091345	up	2.80973	LOC_Os10g25090	up	3.88245	ko04626//Plant-pathogen interaction	GO:0016021//integral component of membrane	GO:0004672//protein kinase activity;GO:0005524//ATP binding	GO:0006468//protein phosphorylation	gi|113639111|dbj|BAF26416.1|/0/Os10g0389800 [Oryza sativa Japonica Group]
TCONS_00059822	up	2.24492	LOC_Os10g25090	up	3.88245	ko04626//Plant-pathogen interaction	GO:0016021//integral component of membrane	GO:0004672//protein kinase activity;GO:0005524//ATP binding	GO:0006468//protein phosphorylation	gi|113639111|dbj|BAF26416.1|/0/Os10g0389800 [Oryza sativa Japonica Group]
TCONS_00005792	up	2.63888	LOC_Os10g25090	up	3.88245	ko04626//Plant-pathogen interaction	GO:0016021//integral component of membrane	GO:0004672//protein kinase activity;GO:0005524//ATP binding	GO:0006468//protein phosphorylation	gi|113639111|dbj|BAF26416.1|/0/Os10g0389800 [Oryza sativa Japonica Group]
TCONS_00010868	up	2.63376	LOC_Os10g25090	up	3.88245	ko04626//Plant-pathogen interaction	GO:0016021//integral component of membrane	GO:0004672//protein kinase activity;GO:0005524//ATP binding	GO:0006468//protein phosphorylation	gi|113639111|dbj|BAF26416.1|/0/Os10g0389800 [Oryza sativa Japonica Group]
TCONS_00056787	up	2.47695	LOC_Os10g25090	up	3.88245	ko04626//Plant-pathogen interaction	GO:0016021//integral component of membrane	GO:0004672//protein kinase activity;GO:0005524//ATP binding	GO:0006468//protein phosphorylation	gi|113639111|dbj|BAF26416.1|/0/Os10g0389800 [Oryza sativa Japonica Group]
TCONS_00008924	up	2.83107	LOC_Os01g54030	up	3.87055	ko03320//PPAR signaling pathway;ko00710//Carbon fixation in photosynthetic organisms;ko01120//Microbial metabolism in diverse environments;ko01100//Metabolic pathways;ko00620//Pyruvate metabolism	-	GO:0046872//metal ion binding;GO:0004471//malate dehydrogenase (decarboxylating) (NAD+) activity;GO:0051287//NAD binding	GO:0006108//malate metabolic process;GO:0055114//oxidation-reduction process	gi|38261493|gb|AAR15892.1|/0/cytosolic NADP malic enzyme [Oryza sativa Indica Group]
TCONS_00091345	up	2.80973	LOC_Os01g54030	up	3.87055	ko03320//PPAR signaling pathway;ko00710//Carbon fixation in photosynthetic organisms;ko01120//Microbial metabolism in diverse environments;ko01100//Metabolic pathways;ko00620//Pyruvate metabolism	-	GO:0046872//metal ion binding;GO:0004471//malate dehydrogenase (decarboxylating) (NAD+) activity;GO:0051287//NAD binding	GO:0006108//malate metabolic process;GO:0055114//oxidation-reduction process	gi|38261493|gb|AAR15892.1|/0/cytosolic NADP malic enzyme [Oryza sativa Indica Group]
TCONS_00005781	up	3.08006	LOC_Os01g54030	up	3.87055	ko03320//PPAR signaling pathway;ko00710//Carbon fixation in photosynthetic organisms;ko01120//Microbial metabolism in diverse environments;ko01100//Metabolic pathways;ko00620//Pyruvate metabolism	-	GO:0046872//metal ion binding;GO:0004471//malate dehydrogenase (decarboxylating) (NAD+) activity;GO:0051287//NAD binding	GO:0006108//malate metabolic process;GO:0055114//oxidation-reduction process	gi|38261493|gb|AAR15892.1|/0/cytosolic NADP malic enzyme [Oryza sativa Indica Group]
TCONS_00005792	up	2.63888	LOC_Os01g54030	up	3.87055	ko03320//PPAR signaling pathway;ko00710//Carbon fixation in photosynthetic organisms;ko01120//Microbial metabolism in diverse environments;ko01100//Metabolic pathways;ko00620//Pyruvate metabolism	-	GO:0046872//metal ion binding;GO:0004471//malate dehydrogenase (decarboxylating) (NAD+) activity;GO:0051287//NAD binding	GO:0006108//malate metabolic process;GO:0055114//oxidation-reduction process	gi|38261493|gb|AAR15892.1|/0/cytosolic NADP malic enzyme [Oryza sativa Indica Group]
TCONS_00010868	up	2.63376	LOC_Os01g54030	up	3.87055	ko03320//PPAR signaling pathway;ko00710//Carbon fixation in photosynthetic organisms;ko01120//Microbial metabolism in diverse environments;ko01100//Metabolic pathways;ko00620//Pyruvate metabolism	-	GO:0046872//metal ion binding;GO:0004471//malate dehydrogenase (decarboxylating) (NAD+) activity;GO:0051287//NAD binding	GO:0006108//malate metabolic process;GO:0055114//oxidation-reduction process	gi|38261493|gb|AAR15892.1|/0/cytosolic NADP malic enzyme [Oryza sativa Indica Group]
TCONS_00059822	up	2.24492	LOC_Os01g54030	up	3.87055	ko03320//PPAR signaling pathway;ko00710//Carbon fixation in photosynthetic organisms;ko01120//Microbial metabolism in diverse environments;ko01100//Metabolic pathways;ko00620//Pyruvate metabolism	-	GO:0046872//metal ion binding;GO:0004471//malate dehydrogenase (decarboxylating) (NAD+) activity;GO:0051287//NAD binding	GO:0006108//malate metabolic process;GO:0055114//oxidation-reduction process	gi|38261493|gb|AAR15892.1|/0/cytosolic NADP malic enzyme [Oryza sativa Indica Group]
TCONS_00056787	up	2.47695	LOC_Os01g42190	up	3.83765	-	GO:0005739//mitochondrion	-	-	gi|53792186|dbj|BAD52819.1|/1.50352e-133/heat shock-like protein [Oryza sativa Japonica Group]
TCONS_00065705	up	2.64989	LOC_Os06g51050	up	3.82519	ko00500//Starch and sucrose metabolism;ko00520//Amino sugar and nucleotide sugar metabolism;ko01100//Metabolic pathways;ko01110//Biosynthesis of secondary metabolites	GO:0016023//cytoplasmic, membrane-bounded vesicle	GO:0008843//endochitinase activity;GO:0008061//chitin binding;GO:0016231//beta-N-acetylglucosaminidase activity	GO:0006032//chitin catabolic process;GO:0016998//cell wall macromolecule catabolic process;GO:0050832//defense response to fungus;GO:0000272//polysaccharide catabolic process	gi|82654928|sp|P24626.2|CHI3_ORYSJ/0/RecName: Full=Chitinase 3; AltName: Full=Basic endochitinase 1; AltName: Full=Class I chitinase c; Short=OsChia1c; AltName: Full=Pathogenesis related (PR)-3 chitinase 3; Flags: Precursor
TCONS_00009978	up	1.89024	LOC_Os06g51050	up	3.82519	ko00500//Starch and sucrose metabolism;ko00520//Amino sugar and nucleotide sugar metabolism;ko01100//Metabolic pathways;ko01110//Biosynthesis of secondary metabolites	GO:0016023//cytoplasmic, membrane-bounded vesicle	GO:0008843//endochitinase activity;GO:0008061//chitin binding;GO:0016231//beta-N-acetylglucosaminidase activity	GO:0006032//chitin catabolic process;GO:0016998//cell wall macromolecule catabolic process;GO:0050832//defense response to fungus;GO:0000272//polysaccharide catabolic process	gi|82654928|sp|P24626.2|CHI3_ORYSJ/0/RecName: Full=Chitinase 3; AltName: Full=Basic endochitinase 1; AltName: Full=Class I chitinase c; Short=OsChia1c; AltName: Full=Pathogenesis related (PR)-3 chitinase 3; Flags: Precursor
TCONS_00081336	up	7.85557	LOC_Os01g56810	up	3.79518	ko00908//Zeatin biosynthesis	GO:0005615//extracellular space;GO:0016023//cytoplasmic, membrane-bounded vesicle	GO:0050660//flavin adenine dinucleotide binding;GO:0016614//oxidoreductase activity, acting on CH-OH group of donors;GO:0019139//cytokinin dehydrogenase activity	GO:0009690//cytokinin metabolic process;GO:0022900//electron transport chain	gi|1002226254|ref|XP_015625931.1|;gi|75252917|sp|Q5ZAY9.1|CKX5_ORYSJ/8.52167e-139;0/PREDICTED: cytokinin dehydrogenase 5 isoform X2 [Oryza sativa Japonica Group];RecName: Full=Cytokinin dehydrogenase 5; AltName: Full=Cytokinin oxidase 5; Short=OsCKX5; Flags: Precursor
TCONS_00081336	up	7.85557	LOC_Os07g17350	up	3.7911	-	-	GO:0003677//DNA binding;GO:0008234//cysteine-type peptidase activity	GO:0006508//proteolysis	gi|38678223|tpg|DAA02091.1|/0/TPA_exp: transposase [Oryza sativa]
TCONS_00059316	up	2.2842	LOC_Os07g17350	up	3.7911	-	-	GO:0003677//DNA binding;GO:0008234//cysteine-type peptidase activity	GO:0006508//proteolysis	gi|38678223|tpg|DAA02091.1|/0/TPA_exp: transposase [Oryza sativa]
TCONS_00056787	up	2.47695	LOC_Os02g16940	up	3.77043	-	GO:0005618//cell wall;GO:0016023//cytoplasmic, membrane-bounded vesicle	GO:0004252//serine-type endopeptidase activity	-	gi|113536048|dbj|BAF08431.1|/0/Os02g0269600 [Oryza sativa Japonica Group]
TCONS_00059822	up	2.24492	LOC_Os02g16940	up	3.77043	-	GO:0005618//cell wall;GO:0016023//cytoplasmic, membrane-bounded vesicle	GO:0004252//serine-type endopeptidase activity	-	gi|113536048|dbj|BAF08431.1|/0/Os02g0269600 [Oryza sativa Japonica Group]
TCONS_00065705	up	2.64989	LOC_Os01g24710	up	3.76459	-	-	GO:0030246//carbohydrate binding	-	gi|122222563|sp|Q0JMY8.1|SALT_ORYSJ/3.77537e-100/RecName: Full=Salt stress-induced protein; Short=Salt protein; AltName: Full=Protein lectin-like; AltName: Full=Protein mannose-binding lectin
TCONS_00089479	up	3.07091	LOC_Os01g24710	up	3.76459	-	-	GO:0030246//carbohydrate binding	-	gi|122222563|sp|Q0JMY8.1|SALT_ORYSJ/3.77537e-100/RecName: Full=Salt stress-induced protein; Short=Salt protein; AltName: Full=Protein lectin-like; AltName: Full=Protein mannose-binding lectin
TCONS_00009514	up	7.62476	LOC_Os11g44830	up	3.76132	-	-	GO:0004386//helicase activity	GO:0006259//DNA metabolic process;GO:0044763;GO:0051276//chromosome organization;GO:0044710	gi|77552439|gb|ABA95236.1|/0/AT hook motif-containing protein, putative, expressed [Oryza sativa Japonica Group]
TCONS_00008316	up	6.93456	LOC_Os11g44830	up	3.76132	-	-	GO:0004386//helicase activity	GO:0006259//DNA metabolic process;GO:0044763;GO:0051276//chromosome organization;GO:0044710	gi|77552439|gb|ABA95236.1|/0/AT hook motif-containing protein, putative, expressed [Oryza sativa Japonica Group]
TCONS_00009514	up	7.62476	LOC_Os02g53130	up	3.70669	ko00910//Nitrogen metabolism;ko00591//Linoleic acid metabolism;ko01120//Microbial metabolism in diverse environments;ko01100//Metabolic pathways;ko00920//Sulfur metabolism	-	GO:0009703//nitrate reductase (NADH) activity;GO:0050464//nitrate reductase (NADPH) activity;GO:0030151//molybdenum ion binding;GO:0020037//heme binding;GO:0050463;GO:0043546//molybdopterin cofactor binding	GO:0006809//nitric oxide biosynthetic process;GO:0042128//nitrate assimilation;GO:0022900//electron transport chain	gi|113537784|dbj|BAF10167.1|/0/Os02g0770800 [Oryza sativa Japonica Group]
TCONS_00008924	up	2.83107	LOC_Os11g03960	up	3.70527	-	-	GO:0003677//DNA binding;GO:0008234//cysteine-type peptidase activity	GO:0006508//proteolysis	gi|77548609|gb|ABA91406.1|/0/transposon protein, putative, CACTA, En/Spm sub-class [Oryza sativa Japonica Group]
TCONS_00091345	up	2.80973	LOC_Os11g03960	up	3.70527	-	-	GO:0003677//DNA binding;GO:0008234//cysteine-type peptidase activity	GO:0006508//proteolysis	gi|77548609|gb|ABA91406.1|/0/transposon protein, putative, CACTA, En/Spm sub-class [Oryza sativa Japonica Group]
TCONS_00059822	up	2.24492	LOC_Os11g03960	up	3.70527	-	-	GO:0003677//DNA binding;GO:0008234//cysteine-type peptidase activity	GO:0006508//proteolysis	gi|77548609|gb|ABA91406.1|/0/transposon protein, putative, CACTA, En/Spm sub-class [Oryza sativa Japonica Group]
TCONS_00005781	up	3.08006	LOC_Os11g03960	up	3.70527	-	-	GO:0003677//DNA binding;GO:0008234//cysteine-type peptidase activity	GO:0006508//proteolysis	gi|77548609|gb|ABA91406.1|/0/transposon protein, putative, CACTA, En/Spm sub-class [Oryza sativa Japonica Group]
TCONS_00005792	up	2.63888	LOC_Os11g03960	up	3.70527	-	-	GO:0003677//DNA binding;GO:0008234//cysteine-type peptidase activity	GO:0006508//proteolysis	gi|77548609|gb|ABA91406.1|/0/transposon protein, putative, CACTA, En/Spm sub-class [Oryza sativa Japonica Group]
TCONS_00010868	up	2.63376	LOC_Os11g03960	up	3.70527	-	-	GO:0003677//DNA binding;GO:0008234//cysteine-type peptidase activity	GO:0006508//proteolysis	gi|77548609|gb|ABA91406.1|/0/transposon protein, putative, CACTA, En/Spm sub-class [Oryza sativa Japonica Group]
TCONS_00091345	up	2.80973	LOC_Os02g43390	up	3.6922	ko05166//HTLV-I infection;ko04115//p53 signaling pathway;ko03440//Homologous recombination;ko00240//Pyrimidine metabolism;ko04110//Cell cycle;ko00908//Zeatin biosynthesis;ko05202//Transcriptional misregulation in cancer;ko01100//Metabolic pathways;ko03460//Fanconi anemia pathway;ko02020//Two-component system;ko04064//NF-kappa B signaling pathway;ko02010//ABC transporters;ko01110//Biosynthesis of …	GO:0016023//cytoplasmic, membrane-bounded vesicle	GO:0003676//nucleic acid binding;GO:0004190//aspartic-type endopeptidase activity;GO:0008270//zinc ion binding	GO:0006508//proteolysis;GO:0015074//DNA integration	gi|116310101|emb|CAH67121.1|/0/H0502G05.12 [Oryza sativa Indica Group]
TCONS_00059822	up	2.24492	LOC_Os02g43390	up	3.6922	ko05166//HTLV-I infection;ko04115//p53 signaling pathway;ko03440//Homologous recombination;ko00240//Pyrimidine metabolism;ko04110//Cell cycle;ko00908//Zeatin biosynthesis;ko05202//Transcriptional misregulation in cancer;ko01100//Metabolic pathways;ko03460//Fanconi anemia pathway;ko02020//Two-component system;ko04064//NF-kappa B signaling pathway;ko02010//ABC transporters;ko01110//Biosynthesis of …	GO:0016023//cytoplasmic, membrane-bounded vesicle	GO:0003676//nucleic acid binding;GO:0004190//aspartic-type endopeptidase activity;GO:0008270//zinc ion binding	GO:0006508//proteolysis;GO:0015074//DNA integration	gi|116310101|emb|CAH67121.1|/0/H0502G05.12 [Oryza sativa Indica Group]
TCONS_00005781	up	3.08006	LOC_Os02g43390	up	3.6922	ko05166//HTLV-I infection;ko04115//p53 signaling pathway;ko03440//Homologous recombination;ko00240//Pyrimidine metabolism;ko04110//Cell cycle;ko00908//Zeatin biosynthesis;ko05202//Transcriptional misregulation in cancer;ko01100//Metabolic pathways;ko03460//Fanconi anemia pathway;ko02020//Two-component system;ko04064//NF-kappa B signaling pathway;ko02010//ABC transporters;ko01110//Biosynthesis of …	GO:0016023//cytoplasmic, membrane-bounded vesicle	GO:0003676//nucleic acid binding;GO:0004190//aspartic-type endopeptidase activity;GO:0008270//zinc ion binding	GO:0006508//proteolysis;GO:0015074//DNA integration	gi|116310101|emb|CAH67121.1|/0/H0502G05.12 [Oryza sativa Indica Group]
TCONS_00010868	up	2.63376	LOC_Os02g43390	up	3.6922	ko05166//HTLV-I infection;ko04115//p53 signaling pathway;ko03440//Homologous recombination;ko00240//Pyrimidine metabolism;ko04110//Cell cycle;ko00908//Zeatin biosynthesis;ko05202//Transcriptional misregulation in cancer;ko01100//Metabolic pathways;ko03460//Fanconi anemia pathway;ko02020//Two-component system;ko04064//NF-kappa B signaling pathway;ko02010//ABC transporters;ko01110//Biosynthesis of …	GO:0016023//cytoplasmic, membrane-bounded vesicle	GO:0003676//nucleic acid binding;GO:0004190//aspartic-type endopeptidase activity;GO:0008270//zinc ion binding	GO:0006508//proteolysis;GO:0015074//DNA integration	gi|116310101|emb|CAH67121.1|/0/H0502G05.12 [Oryza sativa Indica Group]
TCONS_00008924	up	2.83107	LOC_Os01g31840	up	3.68282	ko05166//HTLV-I infection;ko04115//p53 signaling pathway;ko04110//Cell cycle;ko00908//Zeatin biosynthesis;ko05202//Transcriptional misregulation in cancer;ko01100//Metabolic pathways;ko03008//Ribosome biogenesis in eukaryotes;ko04064//NF-kappa B signaling pathway;ko01110//Biosynthesis of secondary metabolites;ko04210//Apoptosis;ko03018//RNA degradation	-	GO:0003676//nucleic acid binding;GO:0008270//zinc ion binding	GO:0015074//DNA integration	gi|62734723|gb|AAX96832.1|/0/retrotransposon protein, putative, Ty1-copia sub-class [Oryza sativa Japonica Group]
TCONS_00091345	up	2.80973	LOC_Os01g31840	up	3.68282	ko05166//HTLV-I infection;ko04115//p53 signaling pathway;ko04110//Cell cycle;ko00908//Zeatin biosynthesis;ko05202//Transcriptional misregulation in cancer;ko01100//Metabolic pathways;ko03008//Ribosome biogenesis in eukaryotes;ko04064//NF-kappa B signaling pathway;ko01110//Biosynthesis of secondary metabolites;ko04210//Apoptosis;ko03018//RNA degradation	-	GO:0003676//nucleic acid binding;GO:0008270//zinc ion binding	GO:0015074//DNA integration	gi|62734723|gb|AAX96832.1|/0/retrotransposon protein, putative, Ty1-copia sub-class [Oryza sativa Japonica Group]
TCONS_00059822	up	2.24492	LOC_Os01g31840	up	3.68282	ko05166//HTLV-I infection;ko04115//p53 signaling pathway;ko04110//Cell cycle;ko00908//Zeatin biosynthesis;ko05202//Transcriptional misregulation in cancer;ko01100//Metabolic pathways;ko03008//Ribosome biogenesis in eukaryotes;ko04064//NF-kappa B signaling pathway;ko01110//Biosynthesis of secondary metabolites;ko04210//Apoptosis;ko03018//RNA degradation	-	GO:0003676//nucleic acid binding;GO:0008270//zinc ion binding	GO:0015074//DNA integration	gi|62734723|gb|AAX96832.1|/0/retrotransposon protein, putative, Ty1-copia sub-class [Oryza sativa Japonica Group]
TCONS_00005781	up	3.08006	LOC_Os01g31840	up	3.68282	ko05166//HTLV-I infection;ko04115//p53 signaling pathway;ko04110//Cell cycle;ko00908//Zeatin biosynthesis;ko05202//Transcriptional misregulation in cancer;ko01100//Metabolic pathways;ko03008//Ribosome biogenesis in eukaryotes;ko04064//NF-kappa B signaling pathway;ko01110//Biosynthesis of secondary metabolites;ko04210//Apoptosis;ko03018//RNA degradation	-	GO:0003676//nucleic acid binding;GO:0008270//zinc ion binding	GO:0015074//DNA integration	gi|62734723|gb|AAX96832.1|/0/retrotransposon protein, putative, Ty1-copia sub-class [Oryza sativa Japonica Group]
TCONS_00005792	up	2.63888	LOC_Os01g31840	up	3.68282	ko05166//HTLV-I infection;ko04115//p53 signaling pathway;ko04110//Cell cycle;ko00908//Zeatin biosynthesis;ko05202//Transcriptional misregulation in cancer;ko01100//Metabolic pathways;ko03008//Ribosome biogenesis in eukaryotes;ko04064//NF-kappa B signaling pathway;ko01110//Biosynthesis of secondary metabolites;ko04210//Apoptosis;ko03018//RNA degradation	-	GO:0003676//nucleic acid binding;GO:0008270//zinc ion binding	GO:0015074//DNA integration	gi|62734723|gb|AAX96832.1|/0/retrotransposon protein, putative, Ty1-copia sub-class [Oryza sativa Japonica Group]
TCONS_00010868	up	2.63376	LOC_Os01g31840	up	3.68282	ko05166//HTLV-I infection;ko04115//p53 signaling pathway;ko04110//Cell cycle;ko00908//Zeatin biosynthesis;ko05202//Transcriptional misregulation in cancer;ko01100//Metabolic pathways;ko03008//Ribosome biogenesis in eukaryotes;ko04064//NF-kappa B signaling pathway;ko01110//Biosynthesis of secondary metabolites;ko04210//Apoptosis;ko03018//RNA degradation	-	GO:0003676//nucleic acid binding;GO:0008270//zinc ion binding	GO:0015074//DNA integration	gi|62734723|gb|AAX96832.1|/0/retrotransposon protein, putative, Ty1-copia sub-class [Oryza sativa Japonica Group]
TCONS_00081336	up	7.85557	LOC_Os04g33820	up	3.68162	ko04075//Plant hormone signal transduction	GO:0016021//integral component of membrane	-	-	gi|32479726|emb|CAE01513.1|/0/OJ991214_12.2 [Oryza sativa Japonica Group]
TCONS_00089479	up	3.07091	LOC_Os11g06770	up	3.67892	-	-	-	-	gi|937937932|dbj|BAT12845.1|;gi|125533543|gb|EAY80091.1|/6.39865e-79;4.62515e-86/Os11g0168500 [Oryza sativa Japonica Group];hypothetical protein OsI_35260 [Oryza sativa Indica Group]
TCONS_00081336	up	7.85557	LOC_Os11g06770	up	3.67892	-	-	-	-	gi|937937932|dbj|BAT12845.1|;gi|125533543|gb|EAY80091.1|/6.39865e-79;4.62515e-86/Os11g0168500 [Oryza sativa Japonica Group];hypothetical protein OsI_35260 [Oryza sativa Indica Group]
TCONS_00065705	up	2.64989	LOC_Os11g06770	up	3.67892	-	-	-	-	gi|937937932|dbj|BAT12845.1|;gi|125533543|gb|EAY80091.1|/6.39865e-79;4.62515e-86/Os11g0168500 [Oryza sativa Japonica Group];hypothetical protein OsI_35260 [Oryza sativa Indica Group]
TCONS_00065705	up	2.64989	LOC_Os04g12950	up	3.67277	-	GO:0009536//plastid;GO:0005739//mitochondrion	GO:0080043//quercetin 3-O-glucosyltransferase activity;GO:0080044//quercetin 7-O-glucosyltransferase activity	GO:0009813//flavonoid biosynthetic process;GO:0052696//flavonoid glucuronidation	gi|125589416|gb|EAZ29766.1|/0/hypothetical protein OsJ_13824 [Oryza sativa Japonica Group]
TCONS_00081336	up	7.85557	LOC_Os04g12950	up	3.67277	-	GO:0009536//plastid;GO:0005739//mitochondrion	GO:0080043//quercetin 3-O-glucosyltransferase activity;GO:0080044//quercetin 7-O-glucosyltransferase activity	GO:0009813//flavonoid biosynthetic process;GO:0052696//flavonoid glucuronidation	gi|125589416|gb|EAZ29766.1|/0/hypothetical protein OsJ_13824 [Oryza sativa Japonica Group]
TCONS_00089479	up	3.07091	LOC_Os04g12950	up	3.67277	-	GO:0009536//plastid;GO:0005739//mitochondrion	GO:0080043//quercetin 3-O-glucosyltransferase activity;GO:0080044//quercetin 7-O-glucosyltransferase activity	GO:0009813//flavonoid biosynthetic process;GO:0052696//flavonoid glucuronidation	gi|125589416|gb|EAZ29766.1|/0/hypothetical protein OsJ_13824 [Oryza sativa Japonica Group]
TCONS_00065705	up	2.64989	LOC_Os11g06980	up	3.66971	-	GO:0005794//Golgi apparatus	-	-	gi|1002304339|ref|XP_015615529.1|/0/PREDICTED: BURP domain-containing protein 17 [Oryza sativa Japonica Group]
TCONS_00089479	up	3.07091	LOC_Os11g06980	up	3.66971	-	GO:0005794//Golgi apparatus	-	-	gi|1002304339|ref|XP_015615529.1|/0/PREDICTED: BURP domain-containing protein 17 [Oryza sativa Japonica Group]
TCONS_00065705	up	2.64989	LOC_Os07g05940	up	3.66136	ko01100//Metabolic pathways;ko00906//Carotenoid biosynthesis;ko01110//Biosynthesis of secondary metabolites	GO:0009570//chloroplast stroma	GO:0046872//metal ion binding;GO:0045549//9-cis-epoxycarotenoid dioxygenase activity	GO:0055114//oxidation-reduction process;GO:0009688//abscisic acid biosynthetic process	gi|1002283127|ref|XP_015645858.1|/0/PREDICTED: LOW QUALITY PROTEIN: 9-cis-epoxycarotenoid dioxygenase 1, chloroplastic [Oryza sativa Japonica Group]
TCONS_00089479	up	3.07091	LOC_Os07g05940	up	3.66136	ko01100//Metabolic pathways;ko00906//Carotenoid biosynthesis;ko01110//Biosynthesis of secondary metabolites	GO:0009570//chloroplast stroma	GO:0046872//metal ion binding;GO:0045549//9-cis-epoxycarotenoid dioxygenase activity	GO:0055114//oxidation-reduction process;GO:0009688//abscisic acid biosynthetic process	gi|1002283127|ref|XP_015645858.1|/0/PREDICTED: LOW QUALITY PROTEIN: 9-cis-epoxycarotenoid dioxygenase 1, chloroplastic [Oryza sativa Japonica Group]
TCONS_00005781	up	3.08006	LOC_Os04g14690	up	3.65723	ko00680//Methane metabolism;ko01120//Microbial metabolism in diverse environments;ko00380//Tryptophan metabolism;ko00982//Drug metabolism - cytochrome P450	-	GO:0050660//flavin adenine dinucleotide binding;GO:0004499//N,N-dimethylaniline monooxygenase activity;GO:0050661//NADP binding	GO:0055114//oxidation-reduction process	gi|38344124|emb|CAD39837.2|/0/OSJNBb0072N21.3 [Oryza sativa Japonica Group]
TCONS_00056787	up	2.47695	LOC_Os04g14690	up	3.65723	ko00680//Methane metabolism;ko01120//Microbial metabolism in diverse environments;ko00380//Tryptophan metabolism;ko00982//Drug metabolism - cytochrome P450	-	GO:0050660//flavin adenine dinucleotide binding;GO:0004499//N,N-dimethylaniline monooxygenase activity;GO:0050661//NADP binding	GO:0055114//oxidation-reduction process	gi|38344124|emb|CAD39837.2|/0/OSJNBb0072N21.3 [Oryza sativa Japonica Group]
TCONS_00059822	up	2.24492	LOC_Os04g14690	up	3.65723	ko00680//Methane metabolism;ko01120//Microbial metabolism in diverse environments;ko00380//Tryptophan metabolism;ko00982//Drug metabolism - cytochrome P450	-	GO:0050660//flavin adenine dinucleotide binding;GO:0004499//N,N-dimethylaniline monooxygenase activity;GO:0050661//NADP binding	GO:0055114//oxidation-reduction process	gi|38344124|emb|CAD39837.2|/0/OSJNBb0072N21.3 [Oryza sativa Japonica Group]
TCONS_00009978	up	1.89024	LOC_Os12g15680	up	3.6565	ko01100//Metabolic pathways;ko00053//Ascorbate and aldarate metabolism	GO:0048046//apoplast;GO:0016023//cytoplasmic, membrane-bounded vesicle	GO:0016722//oxidoreductase activity, oxidizing metal ions;GO:0005507//copper ion binding;GO:0052716//hydroquinone:oxygen oxidoreductase activity	GO:0046274//lignin catabolic process;GO:0055114//oxidation-reduction process	gi|937941668|dbj|BAT16580.1|/0/Os12g0258700 [Oryza sativa Japonica Group]
TCONS_00009978	up	1.89024	LOC_Os03g63970	up	3.64532	ko00904//Diterpenoid biosynthesis;ko01100//Metabolic pathways;ko01110//Biosynthesis of secondary metabolites	-	GO:0045544//gibberellin 20-oxidase activity;GO:0005506//iron ion binding	GO:0055114//oxidation-reduction process;GO:0009416//response to light stimulus;GO:0009908//flower development;GO:0009686//gibberellin biosynthetic process;GO:0009740//gibberellic acid mediated signaling pathway;GO:0009826//unidimensional cell growth	gi|113550422|dbj|BAF13865.1|/0/Os03g0856700 [Oryza sativa Japonica Group]
TCONS_00065705	up	2.64989	LOC_Os05g33130	up	3.57949	ko00500//Starch and sucrose metabolism;ko00520//Amino sugar and nucleotide sugar metabolism;ko01100//Metabolic pathways;ko01110//Biosynthesis of secondary metabolites	GO:0016023//cytoplasmic, membrane-bounded vesicle;GO:0005576//extracellular region	GO:0008061//chitin binding;GO:0004568//chitinase activity	GO:0006032//chitin catabolic process;GO:0016998//cell wall macromolecule catabolic process;GO:0050832//defense response to fungus;GO:0000272//polysaccharide catabolic process	gi|146386456|pdb|2DKV|A/0/Chain A, Crystal Structure Of Class I Chitinase From Oryza Sativa L. Japonica
TCONS_00089479	up	3.07091	LOC_Os05g33130	up	3.57949	ko00500//Starch and sucrose metabolism;ko00520//Amino sugar and nucleotide sugar metabolism;ko01100//Metabolic pathways;ko01110//Biosynthesis of secondary metabolites	GO:0016023//cytoplasmic, membrane-bounded vesicle;GO:0005576//extracellular region	GO:0008061//chitin binding;GO:0004568//chitinase activity	GO:0006032//chitin catabolic process;GO:0016998//cell wall macromolecule catabolic process;GO:0050832//defense response to fungus;GO:0000272//polysaccharide catabolic process	gi|146386456|pdb|2DKV|A/0/Chain A, Crystal Structure Of Class I Chitinase From Oryza Sativa L. Japonica
TCONS_00089479	up	3.07091	LOC_Os05g47690	up	3.5792	ko00740//Riboflavin metabolism;ko01100//Metabolic pathways;ko00100//Steroid biosynthesis	GO:0016021//integral component of membrane;GO:0005789//endoplasmic reticulum membrane	-	-	gi|937920290|dbj|BAS95208.1|/2.68333e-161/Os05g0550250 [Oryza sativa Japonica Group]
TCONS_00065705	up	2.64989	LOC_Os05g47690	up	3.5792	ko00740//Riboflavin metabolism;ko01100//Metabolic pathways;ko00100//Steroid biosynthesis	GO:0016021//integral component of membrane;GO:0005789//endoplasmic reticulum membrane	-	-	gi|937920290|dbj|BAS95208.1|/2.68333e-161/Os05g0550250 [Oryza sativa Japonica Group]
TCONS_00008924	up	2.83107	LOC_Os08g01370	up	3.57381	-	-	-	-	gi|113622747|dbj|BAF22692.1|/1.67855e-65/Os08g0104400 [Oryza sativa Japonica Group]
TCONS_00091345	up	2.80973	LOC_Os08g01370	up	3.57381	-	-	-	-	gi|113622747|dbj|BAF22692.1|/1.67855e-65/Os08g0104400 [Oryza sativa Japonica Group]
TCONS_00059822	up	2.24492	LOC_Os08g01370	up	3.57381	-	-	-	-	gi|113622747|dbj|BAF22692.1|/1.67855e-65/Os08g0104400 [Oryza sativa Japonica Group]
TCONS_00005781	up	3.08006	LOC_Os08g01370	up	3.57381	-	-	-	-	gi|113622747|dbj|BAF22692.1|/1.67855e-65/Os08g0104400 [Oryza sativa Japonica Group]
TCONS_00005792	up	2.63888	LOC_Os08g01370	up	3.57381	-	-	-	-	gi|113622747|dbj|BAF22692.1|/1.67855e-65/Os08g0104400 [Oryza sativa Japonica Group]
TCONS_00010868	up	2.63376	LOC_Os08g01370	up	3.57381	-	-	-	-	gi|113622747|dbj|BAF22692.1|/1.67855e-65/Os08g0104400 [Oryza sativa Japonica Group]
TCONS_00008924	up	2.83107	LOC_Os11g26570	up	3.5699	-	-	-	-	gi|62733137|gb|AAX95254.1|/2.16673e-45/embryogenic-cell protein 40 (ecp40) [Oryza sativa Japonica Group]
TCONS_00091345	up	2.80973	LOC_Os11g26570	up	3.5699	-	-	-	-	gi|62733137|gb|AAX95254.1|/2.16673e-45/embryogenic-cell protein 40 (ecp40) [Oryza sativa Japonica Group]
TCONS_00005781	up	3.08006	LOC_Os11g26570	up	3.5699	-	-	-	-	gi|62733137|gb|AAX95254.1|/2.16673e-45/embryogenic-cell protein 40 (ecp40) [Oryza sativa Japonica Group]
TCONS_00005792	up	2.63888	LOC_Os11g26570	up	3.5699	-	-	-	-	gi|62733137|gb|AAX95254.1|/2.16673e-45/embryogenic-cell protein 40 (ecp40) [Oryza sativa Japonica Group]
TCONS_00010868	up	2.63376	LOC_Os11g26570	up	3.5699	-	-	-	-	gi|62733137|gb|AAX95254.1|/2.16673e-45/embryogenic-cell protein 40 (ecp40) [Oryza sativa Japonica Group]
TCONS_00056787	up	2.47695	LOC_Os11g26570	up	3.5699	-	-	-	-	gi|62733137|gb|AAX95254.1|/2.16673e-45/embryogenic-cell protein 40 (ecp40) [Oryza sativa Japonica Group]
TCONS_00059822	up	2.24492	LOC_Os11g26570	up	3.5699	-	-	-	-	gi|62733137|gb|AAX95254.1|/2.16673e-45/embryogenic-cell protein 40 (ecp40) [Oryza sativa Japonica Group]
TCONS_00065705	up	2.64989	LOC_Os05g50570	up	3.56106	-	GO:0016023//cytoplasmic, membrane-bounded vesicle	GO:0004185//serine-type carboxypeptidase activity	GO:0051603//proteolysis involved in cellular protein catabolic process	gi|937920620|dbj|BAS95538.1|/0/Os05g0582500 [Oryza sativa Japonica Group]
TCONS_00081336	up	7.85557	LOC_Os05g50570	up	3.56106	-	GO:0016023//cytoplasmic, membrane-bounded vesicle	GO:0004185//serine-type carboxypeptidase activity	GO:0051603//proteolysis involved in cellular protein catabolic process	gi|937920620|dbj|BAS95538.1|/0/Os05g0582500 [Oryza sativa Japonica Group]
TCONS_00089479	up	3.07091	LOC_Os05g50570	up	3.56106	-	GO:0016023//cytoplasmic, membrane-bounded vesicle	GO:0004185//serine-type carboxypeptidase activity	GO:0051603//proteolysis involved in cellular protein catabolic process	gi|937920620|dbj|BAS95538.1|/0/Os05g0582500 [Oryza sativa Japonica Group]
TCONS_00081336	up	7.85557	LOC_Os01g32670	up	3.55178	-	-	-	-	gi|113532696|dbj|BAF05079.1|/1.27497e-65/Os01g0510200 [Oryza sativa Japonica Group]
TCONS_00081336	up	7.85557	LOC_Os05g10390	up	3.5373	-	-	GO:0003677//DNA binding;GO:0008234//cysteine-type peptidase activity	GO:0006508//proteolysis	gi|53749279|gb|AAU90138.1|/0/putative polyprotein [Oryza sativa Japonica Group]
TCONS_00081336	up	7.85557	LOC_Os01g39020	up	3.50436	-	GO:0005739//mitochondrion;GO:0005634//nucleus	GO:0044212//transcription regulatory region DNA binding;GO:0043565//sequence-specific DNA binding;GO:0005515//protein binding;GO:0003700//transcription factor activity, sequence-specific DNA binding	GO:0045893//positive regulation of transcription, DNA-templated;GO:0071456//cellular response to hypoxia;GO:0034620//cellular response to unfolded protein;GO:0010286//heat acclimation;GO:0010200//response to chitin;GO:0034605//cellular response to heat;GO:0009644//response to high light intensity;GO:0042542//response to hydrogen peroxide	gi|75288808|sp|Q657C0.1|HFA6B_ORYSJ/0/RecName: Full=Heat stress transcription factor A-6a; AltName: Full=Heat stress transcription factor 1; Short=OsHsf-01
TCONS_00065705	up	2.64989	LOC_Os08g13440	up	3.50325	-	GO:0005618//cell wall;GO:0048046//apoplast;GO:0016023//cytoplasmic, membrane-bounded vesicle	GO:0045735//nutrient reservoir activity;GO:0030145//manganese ion binding;GO:0046564//oxalate decarboxylase activity	GO:0033609//oxalate metabolic process	gi|75225559|sp|Q6ZCR3.1|GL812_ORYSJ/1.05888e-153/RecName: Full=Germin-like protein 8-12; Flags: Precursor
TCONS_00089479	up	3.07091	LOC_Os08g13440	up	3.50325	-	GO:0005618//cell wall;GO:0048046//apoplast;GO:0016023//cytoplasmic, membrane-bounded vesicle	GO:0045735//nutrient reservoir activity;GO:0030145//manganese ion binding;GO:0046564//oxalate decarboxylase activity	GO:0033609//oxalate metabolic process	gi|75225559|sp|Q6ZCR3.1|GL812_ORYSJ/1.05888e-153/RecName: Full=Germin-like protein 8-12; Flags: Precursor
TCONS_00089479	up	3.07091	LOC_Os03g08580	up	3.50313	-	-	-	-	gi|108706546|gb|ABF94341.1|/1.67421e-159/expressed protein [Oryza sativa Japonica Group]
TCONS_00081336	up	7.85557	LOC_Os03g08580	up	3.50313	-	-	-	-	gi|108706546|gb|ABF94341.1|/1.67421e-159/expressed protein [Oryza sativa Japonica Group]
TCONS_00065705	up	2.64989	LOC_Os03g08580	up	3.50313	-	-	-	-	gi|108706546|gb|ABF94341.1|/1.67421e-159/expressed protein [Oryza sativa Japonica Group]
TCONS_00091345	up	2.80973	LOC_Os09g09650	up	3.4903	-	GO:0016021//integral component of membrane;GO:0071013//catalytic step 2 spliceosome	GO:0003676//nucleic acid binding;GO:0008270//zinc ion binding	GO:0000398//mRNA splicing, via spliceosome	gi|49389030|dbj|BAD26273.1|/1.86005e-103/unknown protein [Oryza sativa Japonica Group]
TCONS_00008316	up	6.93456	LOC_Os09g09650	up	3.4903	-	GO:0016021//integral component of membrane;GO:0071013//catalytic step 2 spliceosome	GO:0003676//nucleic acid binding;GO:0008270//zinc ion binding	GO:0000398//mRNA splicing, via spliceosome	gi|49389030|dbj|BAD26273.1|/1.86005e-103/unknown protein [Oryza sativa Japonica Group]
TCONS_00005781	up	3.08006	LOC_Os09g09650	up	3.4903	-	GO:0016021//integral component of membrane;GO:0071013//catalytic step 2 spliceosome	GO:0003676//nucleic acid binding;GO:0008270//zinc ion binding	GO:0000398//mRNA splicing, via spliceosome	gi|49389030|dbj|BAD26273.1|/1.86005e-103/unknown protein [Oryza sativa Japonica Group]
TCONS_00010868	up	2.63376	LOC_Os09g09650	up	3.4903	-	GO:0016021//integral component of membrane;GO:0071013//catalytic step 2 spliceosome	GO:0003676//nucleic acid binding;GO:0008270//zinc ion binding	GO:0000398//mRNA splicing, via spliceosome	gi|49389030|dbj|BAD26273.1|/1.86005e-103/unknown protein [Oryza sativa Japonica Group]
TCONS_00059822	up	2.24492	LOC_Os09g09650	up	3.4903	-	GO:0016021//integral component of membrane;GO:0071013//catalytic step 2 spliceosome	GO:0003676//nucleic acid binding;GO:0008270//zinc ion binding	GO:0000398//mRNA splicing, via spliceosome	gi|49389030|dbj|BAD26273.1|/1.86005e-103/unknown protein [Oryza sativa Japonica Group]
TCONS_00065705	up	2.64989	LOC_Os08g40270	up	3.48466	ko00903//Limonene and pinene degradation;ko05142//Chagas disease (American trypanosomiasis);ko05133//Pertussis;ko05145//Toxoplasmosis;ko04626//Plant-pathogen interaction;ko00642//Ethylbenzene degradation;ko00362//Benzoate degradation;ko04075//Plant hormone signal transduction;ko04722//Neurotrophin signaling pathway;ko05162//Measles;ko00240//Pyrimidine metabolism;ko00051//Fructose and mannose meta…	-	GO:0005488;GO:0016301//kinase activity	-	gi|1002290014|ref|XP_015649334.1|/0/PREDICTED: uncharacterized protein LOC4346025 [Oryza sativa Japonica Group]
TCONS_00089479	up	3.07091	LOC_Os08g40270	up	3.48466	ko00903//Limonene and pinene degradation;ko05142//Chagas disease (American trypanosomiasis);ko05133//Pertussis;ko05145//Toxoplasmosis;ko04626//Plant-pathogen interaction;ko00642//Ethylbenzene degradation;ko00362//Benzoate degradation;ko04075//Plant hormone signal transduction;ko04722//Neurotrophin signaling pathway;ko05162//Measles;ko00240//Pyrimidine metabolism;ko00051//Fructose and mannose meta…	-	GO:0005488;GO:0016301//kinase activity	-	gi|1002290014|ref|XP_015649334.1|/0/PREDICTED: uncharacterized protein LOC4346025 [Oryza sativa Japonica Group]
TCONS_00065705	up	2.64989	LOC_Os06g37150	up	3.48255	ko01100//Metabolic pathways;ko00053//Ascorbate and aldarate metabolism	-	GO:0016722//oxidoreductase activity, oxidizing metal ions;GO:0005507//copper ion binding	-	gi|1002277823|ref|XP_015643242.1|/0/PREDICTED: L-ascorbate oxidase isoform X2 [Oryza sativa Japonica Group]
TCONS_00065705	up	2.64989	LOC_Os06g05410	up	3.46502	-	-	-	-	gi|125596047|gb|EAZ35827.1|/6.84573e-12/hypothetical protein OsJ_20120 [Oryza sativa Japonica Group]
TCONS_00089479	up	3.07091	LOC_Os06g05410	up	3.46502	-	-	-	-	gi|125596047|gb|EAZ35827.1|/6.84573e-12/hypothetical protein OsJ_20120 [Oryza sativa Japonica Group]
TCONS_00008924	up	2.83107	LOC_Os01g74020	up	3.45456	ko04075//Plant hormone signal transduction	-	-	-	gi|75332124|sp|Q94DH3.1|PCL1_ORYSJ/5.70888e-108/RecName: Full=Transcription factor PCL1; AltName: Full=Protein PHYTOCLOCK 1 homolog; Short=OsPCL1
TCONS_00091345	up	2.80973	LOC_Os01g74020	up	3.45456	ko04075//Plant hormone signal transduction	-	-	-	gi|75332124|sp|Q94DH3.1|PCL1_ORYSJ/5.70888e-108/RecName: Full=Transcription factor PCL1; AltName: Full=Protein PHYTOCLOCK 1 homolog; Short=OsPCL1
TCONS_00059822	up	2.24492	LOC_Os01g74020	up	3.45456	ko04075//Plant hormone signal transduction	-	-	-	gi|75332124|sp|Q94DH3.1|PCL1_ORYSJ/5.70888e-108/RecName: Full=Transcription factor PCL1; AltName: Full=Protein PHYTOCLOCK 1 homolog; Short=OsPCL1
TCONS_00005781	up	3.08006	LOC_Os01g74020	up	3.45456	ko04075//Plant hormone signal transduction	-	-	-	gi|75332124|sp|Q94DH3.1|PCL1_ORYSJ/5.70888e-108/RecName: Full=Transcription factor PCL1; AltName: Full=Protein PHYTOCLOCK 1 homolog; Short=OsPCL1
TCONS_00005792	up	2.63888	LOC_Os01g74020	up	3.45456	ko04075//Plant hormone signal transduction	-	-	-	gi|75332124|sp|Q94DH3.1|PCL1_ORYSJ/5.70888e-108/RecName: Full=Transcription factor PCL1; AltName: Full=Protein PHYTOCLOCK 1 homolog; Short=OsPCL1
TCONS_00010868	up	2.63376	LOC_Os01g74020	up	3.45456	ko04075//Plant hormone signal transduction	-	-	-	gi|75332124|sp|Q94DH3.1|PCL1_ORYSJ/5.70888e-108/RecName: Full=Transcription factor PCL1; AltName: Full=Protein PHYTOCLOCK 1 homolog; Short=OsPCL1
TCONS_00059822	up	2.24492	LOC_Os05g24780	up	3.44751	ko04626//Plant-pathogen interaction	GO:0009536//plastid	GO:0005509//calcium ion binding	-	gi|125551781|gb|EAY97490.1|/2.41556e-50/hypothetical protein OsI_19419 [Oryza sativa Indica Group]
TCONS_00056787	up	2.47695	LOC_Os05g24780	up	3.44751	ko04626//Plant-pathogen interaction	GO:0009536//plastid	GO:0005509//calcium ion binding	-	gi|125551781|gb|EAY97490.1|/2.41556e-50/hypothetical protein OsI_19419 [Oryza sativa Indica Group]
TCONS_00070703	up	3.1046	LOC_Os01g03290	up	3.44626	ko04115//p53 signaling pathway;ko04310//Wnt signaling pathway;ko04120//Ubiquitin mediated proteolysis	GO:0005737//cytoplasm;GO:0005634//nucleus	GO:0016874//ligase activity;GO:0061630//ubiquitin protein ligase activity;GO:0008270//zinc ion binding	GO:0042787//protein ubiquitination involved in ubiquitin-dependent protein catabolic process;GO:0043161//proteasome-mediated ubiquitin-dependent protein catabolic process;GO:0007275//multicellular organism development;GO:0006915//apoptotic process	gi|937894172|dbj|BAS70152.1|/0/Os01g0123700 [Oryza sativa Japonica Group]
TCONS_00059822	up	2.24492	LOC_Os01g65460	up	3.44203	ko00531//Glycosaminoglycan degradation;ko00052//Galactose metabolism;ko00400//Phenylalanine, tyrosine and tryptophan biosynthesis;ko00051//Fructose and mannose metabolism;ko04142//Lysosome;ko00520//Amino sugar and nucleotide sugar metabolism;ko00604//Glycosphingolipid biosynthesis - ganglio series;ko01100//Metabolic pathways;ko00600//Sphingolipid metabolism;ko03010//Ribosome;ko01110//Biosynthesis…	GO:0009505//plant-type cell wall;GO:0005773//vacuole;GO:0016023//cytoplasmic, membrane-bounded vesicle	GO:0030246//carbohydrate binding;GO:0004565//beta-galactosidase activity	GO:0005975//carbohydrate metabolic process	gi|937899517|dbj|BAS75497.1|/0/Os01g0875500 [Oryza sativa Japonica Group]
TCONS_00005781	up	3.08006	LOC_Os01g65460	up	3.44203	ko00531//Glycosaminoglycan degradation;ko00052//Galactose metabolism;ko00400//Phenylalanine, tyrosine and tryptophan biosynthesis;ko00051//Fructose and mannose metabolism;ko04142//Lysosome;ko00520//Amino sugar and nucleotide sugar metabolism;ko00604//Glycosphingolipid biosynthesis - ganglio series;ko01100//Metabolic pathways;ko00600//Sphingolipid metabolism;ko03010//Ribosome;ko01110//Biosynthesis…	GO:0009505//plant-type cell wall;GO:0005773//vacuole;GO:0016023//cytoplasmic, membrane-bounded vesicle	GO:0030246//carbohydrate binding;GO:0004565//beta-galactosidase activity	GO:0005975//carbohydrate metabolic process	gi|937899517|dbj|BAS75497.1|/0/Os01g0875500 [Oryza sativa Japonica Group]
TCONS_00056787	up	2.47695	LOC_Os03g60380	up	3.43655	ko00940//Phenylpropanoid biosynthesis;ko01100//Metabolic pathways;ko01110//Biosynthesis of secondary metabolites	GO:0005829//cytosol	GO:0050662//coenzyme binding;GO:0003824//catalytic activity	-	gi|125588404|gb|EAZ29068.1|/0/hypothetical protein OsJ_13122 [Oryza sativa Japonica Group]
TCONS_00009978	up	1.89024	LOC_Os01g55240	up	3.41429	ko00904//Diterpenoid biosynthesis	-	GO:0005506//iron ion binding;GO:0052634//C-19 gibberellin 2-beta-dioxygenase activity	GO:0045487//gibberellin catabolic process;GO:0009416//response to light stimulus;GO:0055114//oxidation-reduction process	gi|20161223|dbj|BAB90150.1|/0
TCONS_00091345	up	2.80973	LOC_Os05g33960	up	3.41276	-	GO:0016021//integral component of membrane	GO:0005215//transporter activity	GO:0006810//transport	gi|1002267576|ref|XP_015638108.1|/0/PREDICTED: protein NRT1/ PTR FAMILY 3.1 [Oryza sativa Japonica Group]
TCONS_00059822	up	2.24492	LOC_Os05g33960	up	3.41276	-	GO:0016021//integral component of membrane	GO:0005215//transporter activity	GO:0006810//transport	gi|1002267576|ref|XP_015638108.1|/0/PREDICTED: protein NRT1/ PTR FAMILY 3.1 [Oryza sativa Japonica Group]
TCONS_00008316	up	6.93456	LOC_Os05g33960	up	3.41276	-	GO:0016021//integral component of membrane	GO:0005215//transporter activity	GO:0006810//transport	gi|1002267576|ref|XP_015638108.1|/0/PREDICTED: protein NRT1/ PTR FAMILY 3.1 [Oryza sativa Japonica Group]
TCONS_00005781	up	3.08006	LOC_Os05g33960	up	3.41276	-	GO:0016021//integral component of membrane	GO:0005215//transporter activity	GO:0006810//transport	gi|1002267576|ref|XP_015638108.1|/0/PREDICTED: protein NRT1/ PTR FAMILY 3.1 [Oryza sativa Japonica Group]
TCONS_00089479	up	3.07091	LOC_Os03g09910	up	3.4127	ko00230//Purine metabolism;ko01100//Metabolic pathways;ko00300//Lysine biosynthesis;ko01110//Biosynthesis of secondary metabolites	-	GO:0010285//L,L-diaminopimelate aminotransferase activity;GO:0030170//pyridoxal phosphate binding	GO:0009862//systemic acquired resistance, salicylic acid mediated signaling pathway;GO:0042742//defense response to bacterium;GO:0009089//lysine biosynthetic process via diaminopimelate;GO:0010150//leaf senescence	gi|75129647|sp|Q6VMN7.1|ALD1_ORYSJ/0/RecName: Full=Aminotransferase ALD1 homolog
TCONS_00065705	up	2.64989	LOC_Os03g09910	up	3.4127	ko00230//Purine metabolism;ko01100//Metabolic pathways;ko00300//Lysine biosynthesis;ko01110//Biosynthesis of secondary metabolites	-	GO:0010285//L,L-diaminopimelate aminotransferase activity;GO:0030170//pyridoxal phosphate binding	GO:0009862//systemic acquired resistance, salicylic acid mediated signaling pathway;GO:0042742//defense response to bacterium;GO:0009089//lysine biosynthetic process via diaminopimelate;GO:0010150//leaf senescence	gi|75129647|sp|Q6VMN7.1|ALD1_ORYSJ/0/RecName: Full=Aminotransferase ALD1 homolog
TCONS_00070703	up	3.1046	LOC_Os09g27700	up	3.41034	-	-	GO:0008017//microtubule binding	GO:0000226//microtubule cytoskeleton organization;GO:0000910//cytokinesis	gi|51535888|dbj|BAD37971.1|/0/putative microtubule-associated protein MAP65-1a [Oryza sativa Japonica Group]
TCONS_00091345	up	2.80973	LOC_Os06g46740	up	3.38018	-	GO:0016021//integral component of membrane;GO:0016023//cytoplasmic, membrane-bounded vesicle;GO:0046658//anchored component of plasma membrane	GO:0009055//electron carrier activity	-	gi|113596416|dbj|BAF20290.1|/5.37549e-79/Os06g0681200 [Oryza sativa Japonica Group]
TCONS_00056787	up	2.47695	LOC_Os06g46740	up	3.38018	-	GO:0016021//integral component of membrane;GO:0016023//cytoplasmic, membrane-bounded vesicle;GO:0046658//anchored component of plasma membrane	GO:0009055//electron carrier activity	-	gi|113596416|dbj|BAF20290.1|/5.37549e-79/Os06g0681200 [Oryza sativa Japonica Group]
TCONS_00059822	up	2.24492	LOC_Os06g46740	up	3.38018	-	GO:0016021//integral component of membrane;GO:0016023//cytoplasmic, membrane-bounded vesicle;GO:0046658//anchored component of plasma membrane	GO:0009055//electron carrier activity	-	gi|113596416|dbj|BAF20290.1|/5.37549e-79/Os06g0681200 [Oryza sativa Japonica Group]
TCONS_00009978	up	1.89024	LOC_Os08g39860	up	3.37369	ko00500//Starch and sucrose metabolism;ko02030//Bacterial chemotaxis;ko00940//Phenylpropanoid biosynthesis;ko00460//Cyanoamino acid metabolism;ko01100//Metabolic pathways;ko02020//Two-component system;ko01110//Biosynthesis of secondary metabolites	GO:0016023//cytoplasmic, membrane-bounded vesicle;GO:0005739//mitochondrion	GO:0102483//scopolin beta-glucosidase activity;GO:0008422//beta-glucosidase activity	GO:0005975//carbohydrate metabolic process;GO:1901657//glycosyl compound metabolic process	gi|75149042|sp|Q84YK7.1|BGL27_ORYSJ;gi|937931266|dbj|BAT06182.1|/0;0/RecName: Full=Beta-glucosidase 27; Short=Os8bglu27; Flags: Precursor;Os08g0509200 [Oryza sativa Japonica Group]
TCONS_00070703	up	3.1046	LOC_Os03g46070	up	3.35542	-	GO:0016023//cytoplasmic, membrane-bounded vesicle	-	-	gi|1002257185|ref|XP_015632910.1|/9.60738e-150/PREDICTED: alpha-amylase/trypsin inhibitor [Oryza sativa Japonica Group]
TCONS_00070703	up	3.1046	LOC_Os10g38080	up	3.35235	-	GO:0005618//cell wall;GO:0016023//cytoplasmic, membrane-bounded vesicle	GO:0004252//serine-type endopeptidase activity	GO:0006508//proteolysis	gi|31433153|gb|AAP54706.1|/0/Subtilisin N-terminal Re
TCONS_00009978	up	1.89024	LOC_Os08g36680	up	3.35049	ko00910//Nitrogen metabolism	-	GO:0008270//zinc ion binding;GO:0004089//carbonate dehydratase activity	GO:0006730//one-carbon metabolic process	gi|1002289320|ref|XP_015648960.1|/0/PREDICTED: alpha carbonic anhydrase 5 [Oryza sativa Japonica Group]
TCONS_00089479	up	3.07091	LOC_Os09g10620	up	3.34179	-	-	-	-	gi|255678735|dbj|BAF24667.2|/1.59528e-06/Os09g0278000 [Oryza sativa Japonica Group]
TCONS_00065705	up	2.64989	LOC_Os09g10620	up	3.34179	-	-	-	-	gi|255678735|dbj|BAF24667.2|/1.59528e-06/Os09g0278000 [Oryza sativa Japonica Group]
TCONS_00009978	up	1.89024	LOC_Os11g17504	up	3.34069	ko00623//Toluene degradation;ko00361//Chlorocyclohexane and chlorobenzene degradation;ko00364//Fluorobenzoate degradation;ko01120//Microbial metabolism in diverse environments;ko01100//Metabolic pathways;ko00100//Steroid biosynthesis;ko01110//Biosynthesis of secondary metabolites	GO:0016023//cytoplasmic, membrane-bounded vesicle	GO:0016787//hydrolase activity	-	gi|113644904|dbj|BAF28045.1|;gi|1002304272|ref|XP_015615499.1|/2.09635e-68;2.82386e-180/Os11g0275200 [Oryza sativa Japonica Group];PREDICTED: endo-1,3;1,4-beta-D-glucanase [Oryza sativa Japonica Group]
TCONS_00065705	up	2.64989	LOC_Os01g03340	up	3.32747	-	GO:0005576//extracellular region;GO:0016023//cytoplasmic, membrane-bounded vesicle	GO:0004867//serine-type endopeptidase inhibitor activity	GO:0010951//negative regulation of endopeptidase activity	gi|145944486|gb|ABP98945.1|/0/Bowman-Birk type proteinase inhibitor A [Oryza sativa Japonica Group]
TCONS_00065705	up	2.64989	LOC_Os04g32810	up	3.32742	-	GO:0005737//cytoplasm	GO:0046914//transition metal ion binding	GO:0046916//cellular transition metal ion homeostasis;GO:0030001//metal ion transport	gi|38605807|emb|CAE05278.3|/1.84047e-95/OSJNBb0014D23.12 [Oryza sativa Japonica Group]
TCONS_00089479	up	3.07091	LOC_Os04g32810	up	3.32742	-	GO:0005737//cytoplasm	GO:0046914//transition metal ion binding	GO:0046916//cellular transition metal ion homeostasis;GO:0030001//metal ion transport	gi|38605807|emb|CAE05278.3|/1.84047e-95/OSJNBb0014D23.12 [Oryza sativa Japonica Group]
TCONS_00065705	up	2.64989	LOC_Os07g28200	up	3.32435	ko03440//Homologous recombination;ko00240//Pyrimidine metabolism;ko01100//Metabolic pathways;ko02020//Two-component system;ko02010//ABC transporters;ko00670//One carbon pool by folate	-	GO:0003964//RNA-directed DNA polymerase activity;GO:0003677//DNA binding;GO:0003723//RNA binding;GO:0004190//aspartic-type endopeptidase activity;GO:0008270//zinc ion binding	GO:0006278//RNA-dependent DNA biosynthetic process;GO:0006508//proteolysis;GO:0015074//DNA integration;GO:0006310//DNA recombination	gi|19225021|gb|AAL86497.1|AC099040_1/0/putative polyprotein [Oryza sativa Japonica Group]
TCONS_00065705	up	2.64989	LOC_Os02g57400	up	3.31409	-	-	-	GO:0010264//myo-inositol hexakisphosphate biosynthetic process	gi|170799872|gb|ACB38660.1|;gi|170799866|gb|ACB38657.1|/0;0/mutant low phytic acid protein 1 [Oryza sativa Japonica Group];mutant low phytic acid protein 1 [Oryza sativa Japonica Group]
TCONS_00089479	up	3.07091	LOC_Os02g57400	up	3.31409	-	-	-	GO:0010264//myo-inositol hexakisphosphate biosynthetic process	gi|170799872|gb|ACB38660.1|;gi|170799866|gb|ACB38657.1|/0;0/mutant low phytic acid protein 1 [Oryza sativa Japonica Group];mutant low phytic acid protein 1 [Oryza sativa Japonica Group]
TCONS_00065705	up	2.64989	LOC_Os06g35700	up	3.2937	-	GO:0016023//cytoplasmic, membrane-bounded vesicle	GO:0016614//oxidoreductase activity, acting on CH-OH group of donors;GO:0050660//flavin adenine dinucleotide binding	GO:0055114//oxidation-reduction process;GO:0050794//regulation of cellular process	gi|113595873|dbj|BAF19747.1|/0/Os06g0549900 [Oryza sativa Japonica Group]
TCONS_00081336	up	7.85557	LOC_Os04g16430	up	3.28881	ko03440//Homologous recombination;ko00240//Pyrimidine metabolism;ko01100//Metabolic pathways;ko03460//Fanconi anemia pathway;ko02020//Two-component system;ko02010//ABC transporters;ko00670//One carbon pool by folate	-	GO:0003964//RNA-directed DNA polymerase activity;GO:0003677//DNA binding;GO:0003723//RNA binding;GO:0004190//aspartic-type endopeptidase activity;GO:0008270//zinc ion binding	GO:0006278//RNA-dependent DNA biosynthetic process;GO:0006508//proteolysis;GO:0015074//DNA integration;GO:0006310//DNA recombination	gi|32489461|emb|CAE05815.1|/0/OSJNBa0028M15.7 [Oryza sativa Japonica Group]
TCONS_00056787	up	2.47695	LOC_Os03g21040	up	3.28722	-	-	-	-	gi|1296955|emb|CAA64683.1|;gi|108707932|gb|ABF95727.1|/0;2.88001e-177/osr40c1 [Oryza sativa Indica Group];expressed protein [Oryza sativa Japonica Group]
TCONS_00059822	up	2.24492	LOC_Os03g21040	up	3.28722	-	-	-	-	gi|1296955|emb|CAA64683.1|;gi|108707932|gb|ABF95727.1|/0;2.88001e-177/osr40c1 [Oryza sativa Indica Group];expressed protein [Oryza sativa Japonica Group]
TCONS_00056787	up	2.47695	LOC_Os12g03050	up	3.25675	-	GO:0005634//nucleus	GO:0003677//DNA binding	GO:0006355//regulation of transcription, DNA-templated	gi|84029362|sp|Q5CD17.2|NAC77_ORYSJ/0/RecName: Full=NAC domain-containing protein 77; Short=ONAC077; AltName: Full=NAC domain-containing protein 300; Short=ONAC300
TCONS_00065705	up	2.64989	LOC_Os04g59190	up	3.24781	ko00940//Phenylpropanoid biosynthesis;ko00360//Phenylalanine metabolism;ko01100//Metabolic pathways;ko01110//Biosynthesis of secondary metabolites	GO:0009505//plant-type cell wall;GO:0005576//extracellular region;GO:0016023//cytoplasmic, membrane-bounded vesicle	GO:0046872//metal ion binding;GO:0020037//heme binding;GO:0004601//peroxidase activity	GO:0098869//cellular oxidant detoxification;GO:0006979//response to oxidative stress;GO:0042744//hydrogen peroxide catabolic process;GO:0009664//plant-type cell wall organization;GO:0055114//oxidation-reduction process	gi|5777627|emb|CAB53488.1|/0/CAA303715.1 protein [Oryza sativa]
TCONS_00089479	up	3.07091	LOC_Os04g59190	up	3.24781	ko00940//Phenylpropanoid biosynthesis;ko00360//Phenylalanine metabolism;ko01100//Metabolic pathways;ko01110//Biosynthesis of secondary metabolites	GO:0009505//plant-type cell wall;GO:0005576//extracellular region;GO:0016023//cytoplasmic, membrane-bounded vesicle	GO:0046872//metal ion binding;GO:0020037//heme binding;GO:0004601//peroxidase activity	GO:0098869//cellular oxidant detoxification;GO:0006979//response to oxidative stress;GO:0042744//hydrogen peroxide catabolic process;GO:0009664//plant-type cell wall organization;GO:0055114//oxidation-reduction process	gi|5777627|emb|CAB53488.1|/0/CAA303715.1 protein [Oryza sativa]
TCONS_00059822	up	2.24492	LOC_Os01g64670	up	3.23959	ko00190//Oxidative phosphorylation	GO:0016020//membrane;GO:0005737//cytoplasm	GO:0004427//inorganic diphosphatase activity;GO:0000287//magnesium ion binding	GO:0006796//phosphate-containing compound metabolic process	gi|113534438|dbj|BAF06821.1|/1.66488e-157/Os01g0866500 [Oryza sativa Japonica Group]
TCONS_00056787	up	2.47695	LOC_Os01g64670	up	3.23959	ko00190//Oxidative phosphorylation	GO:0016020//membrane;GO:0005737//cytoplasm	GO:0004427//inorganic diphosphatase activity;GO:0000287//magnesium ion binding	GO:0006796//phosphate-containing compound metabolic process	gi|113534438|dbj|BAF06821.1|/1.66488e-157/Os01g0866500 [Oryza sativa Japonica Group]
TCONS_00065705	up	2.64989	LOC_Os01g06730	up	3.23876	ko04626//Plant-pathogen interaction	GO:0016021//integral component of membrane;GO:0016023//cytoplasmic, membrane-bounded vesicle	-	-	gi|1002227256|ref|XP_015630998.1|/0/PREDICTED: receptor-like protein 12 [Oryza sativa Japonica Group]
TCONS_00089479	up	3.07091	LOC_Os01g06730	up	3.23876	ko04626//Plant-pathogen interaction	GO:0016021//integral component of membrane;GO:0016023//cytoplasmic, membrane-bounded vesicle	-	-	gi|1002227256|ref|XP_015630998.1|/0/PREDICTED: receptor-like protein 12 [Oryza sativa Japonica Group]
TCONS_00009978	up	1.89024	LOC_Os07g09190	up	3.20779	ko00900//Terpenoid backbone biosynthesis;ko01100//Metabolic pathways;ko02010//ABC transporters;ko01110//Biosynthesis of secondary metabolites	GO:0009507//chloroplast	GO:0046872//metal ion binding;GO:0008661//1-deoxy-D-xylulose-5-phosphate synthase activity	GO:0016114//terpenoid biosynthetic process;GO:0009228//thiamine biosynthetic process;GO:0052865//1-deoxy-D-xylulose 5-phosphate biosynthetic process	gi|75225072|sp|Q6YU51.1|DXS2_ORYSJ/0/RecName: Full=Probable 1-deoxy-D-xylulose-5-phosphate synthase 2, chloroplastic; Short=1-deoxyxylulose-5-phosphate synthase; Short=DXP synthase; Short=DXPS; Flags: Precursor
TCONS_00065705	up	2.64989	LOC_Os02g14440	up	3.19452	ko00940//Phenylpropanoid biosynthesis;ko00360//Phenylalanine metabolism;ko01100//Metabolic pathways;ko01110//Biosynthesis of secondary metabolites	GO:0005576//extracellular region;GO:0016023//cytoplasmic, membrane-bounded vesicle	GO:0046872//metal ion binding;GO:0020037//heme binding;GO:0004601//peroxidase activity	GO:0098869//cellular oxidant detoxification;GO:0006979//response to oxidative stress;GO:0042744//hydrogen peroxide catabolic process;GO:0055114//oxidation-reduction process	gi|55700925|tpe|CAH69271.1|/0/TPA: class III peroxidase 29 precursor [Oryza sativa Japonica Group]
TCONS_00081336	up	7.85557	LOC_Os02g14440	up	3.19452	ko00940//Phenylpropanoid biosynthesis;ko00360//Phenylalanine metabolism;ko01100//Metabolic pathways;ko01110//Biosynthesis of secondary metabolites	GO:0005576//extracellular region;GO:0016023//cytoplasmic, membrane-bounded vesicle	GO:0046872//metal ion binding;GO:0020037//heme binding;GO:0004601//peroxidase activity	GO:0098869//cellular oxidant detoxification;GO:0006979//response to oxidative stress;GO:0042744//hydrogen peroxide catabolic process;GO:0055114//oxidation-reduction process	gi|55700925|tpe|CAH69271.1|/0/TPA: class III peroxidase 29 precursor [Oryza sativa Japonica Group]
TCONS_00089479	up	3.07091	LOC_Os02g14440	up	3.19452	ko00940//Phenylpropanoid biosynthesis;ko00360//Phenylalanine metabolism;ko01100//Metabolic pathways;ko01110//Biosynthesis of secondary metabolites	GO:0005576//extracellular region;GO:0016023//cytoplasmic, membrane-bounded vesicle	GO:0046872//metal ion binding;GO:0020037//heme binding;GO:0004601//peroxidase activity	GO:0098869//cellular oxidant detoxification;GO:0006979//response to oxidative stress;GO:0042744//hydrogen peroxide catabolic process;GO:0055114//oxidation-reduction process	gi|55700925|tpe|CAH69271.1|/0/TPA: class III peroxidase 29 precursor [Oryza sativa Japonica Group]
TCONS_00081336	up	7.85557	LOC_Os09g31970	up	3.18759	ko00900//Terpenoid backbone biosynthesis;ko04976//Bile secretion;ko01100//Metabolic pathways;ko01110//Biosynthesis of secondary metabolites	GO:0016021//integral component of membrane;GO:0005739//mitochondrion;GO:0005778//peroxisomal membrane;GO:0005789//endoplasmic reticulum membrane	GO:0004420//hydroxymethylglutaryl-CoA reductase (NADPH) activity;GO:0050661//NADP binding	GO:0015936//coenzyme A metabolic process;GO:0055114//oxidation-reduction process;GO:0008299//isoprenoid biosynthetic process;GO:0016126//sterol biosynthetic process	gi|113631774|dbj|BAF25455.1|/0/Os09g0492700 [Oryza sativa Japonica Group]
TCONS_00056787	up	2.47695	LOC_Os04g58960	up	3.18402	ko04120//Ubiquitin mediated proteolysis	-	GO:0046872//metal ion binding	-	gi|38345822|emb|CAD41927.2|/0/OSJNBa0070M12.5 [Oryza sativa Japonica Group]
TCONS_00081336	up	7.85557	LOC_Os10g37940	up	3.18248	ko03013//RNA transport;ko03015//mRNA surveillance pathway;ko03008//Ribosome biogenesis in eukaryotes;ko03018//RNA degradation	GO:0005739//mitochondrion	-	-	gi|110289448|gb|AAP54692.2|/0/retrotransposon protein, putative, unclassified [Oryza sativa Japonica Group]
TCONS_00056787	up	2.47695	LOC_Os03g63790	up	3.17227	ko03440//Homologous recombination;ko00240//Pyrimidine metabolism;ko01100//Metabolic pathways;ko03460//Fanconi anemia pathway;ko02020//Two-component system;ko02010//ABC transporters;ko00670//One carbon pool by folate	GO:0009536//plastid	GO:0004523//RNA-DNA hybrid ribonuclease activity;GO:0003676//nucleic acid binding	GO:0090502//RNA phosphodiester bond hydrolysis, endonucleolytic;GO:0015074//DNA integration	gi|29126347|gb|AAO66539.1|/0/retrotransposon protein, putative, unclassified [Oryza sativa Japonica Group]
TCONS_00056787	up	2.47695	LOC_Os12g16720	up	3.16195	ko00624//Polycyclic aromatic hydrocarbon degradation;ko00903//Limonene and pinene degradation;ko00966//Glucosinolate biosynthesis;ko01120//Microbial metabolism in diverse environments;ko01100//Metabolic pathways;ko00627//Aminobenzoate degradation;ko00380//Tryptophan metabolism;ko00945//Stilbenoid, diarylheptanoid and gingerol biosynthesis;ko00363//Bisphenol degradation;ko01110//Biosynthesis of se…	GO:0016021//integral component of membrane	GO:0016709//oxidoreductase activity, acting on paired donors, with incorporation or reduction of molecular oxygen, NAD(P)H as one donor, and incorporation of one atom of oxygen;GO:0020037//heme binding;GO:0005506//iron ion binding	GO:0044550//secondary metabolite biosynthetic process;GO:0055114//oxidation-reduction process	gi|77554241|gb|ABA97037.1|/0/Cytochrome P450 family protein, expressed [Oryza sativa Japonica Group]
TCONS_00059822	up	2.24492	LOC_Os01g73930	up	3.15384	-	GO:0016020//membrane;GO:0005739//mitochondrion	GO:0003676//nucleic acid binding;GO:0008270//zinc ion binding	-	gi|38605784|emb|CAE05885.3|/0/OSJNBa0044K18.27 [Oryza sativa Japonica Group]
TCONS_00056787	up	2.47695	LOC_Os01g73930	up	3.15384	-	GO:0016020//membrane;GO:0005739//mitochondrion	GO:0003676//nucleic acid binding;GO:0008270//zinc ion binding	-	gi|38605784|emb|CAE05885.3|/0/OSJNBa0044K18.27 [Oryza sativa Japonica Group]
TCONS_00065705	up	2.64989	LOC_Os04g32800	up	3.15013	-	GO:0005737//cytoplasm	GO:0046914//transition metal ion binding	GO:0046916//cellular transition metal ion homeostasis;GO:0030001//metal ion transport	gi|937914114|dbj|BAS89033.1|/5.07028e-71/Os04g0400000 [Oryza sativa Japonica Group]
TCONS_00081336	up	7.85557	LOC_Os01g54620	up	3.14942	-	GO:0005618//cell wall;GO:0016021//integral component of membrane;GO:0005886//plasma membrane	GO:0046872//metal ion binding;GO:0016760//cellulose synthase (UDP-forming) activity	GO:0009414//response to water deprivation;GO:0030244//cellulose biosynthetic process;GO:0042742//defense response to bacterium;GO:0071555//cell wall organization;GO:0006970//response to osmotic stress;GO:0050832//defense response to fungus;GO:0009834//plant-type secondary cell wall biogenesis	gi|75106446|sp|Q5JN63.1|CESA4_ORYSJ/0/RecName: Full=Cellulose synthase A catalytic subunit 4 [UDP-forming]; AltName: Full=OsCesA4
TCONS_00009514	up	7.62476	LOC_Os01g72360	up	3.14736	-	-	-	-	gi|113534954|dbj|BAF07337.1|/1.21477e-115/Os01g0952900 [Oryza sativa Japonica Group]
TCONS_00008316	up	6.93456	LOC_Os01g72360	up	3.14736	-	-	-	-	gi|113534954|dbj|BAF07337.1|/1.21477e-115/Os01g0952900 [Oryza sativa Japonica Group]
TCONS_00009978	up	1.89024	LOC_Os05g03610	up	3.14599	ko04020//Calcium signaling pathway;ko00562//Inositol phosphate metabolism;ko01100//Metabolic pathways;ko04070//Phosphatidylinositol signaling system	GO:0005622//intracellular	GO:0004871//signal transducer activity;GO:0004435//phosphatidylinositol phospholipase C activity	GO:0035556//intracellular signal transduction;GO:0016042//lipid catabolic process	gi|113578082|dbj|BAF16445.1|/0/Os05g0127200 [Oryza sativa Japonica Group]
TCONS_00081336	up	7.85557	LOC_Os08g34860	up	3.1423	-	-	-	-	gi|42407609|dbj|BAD08724.1|/0/F-box protein family-like [Oryza sativa Japonica Group]
TCONS_00008924	up	2.83107	LOC_Os03g36279	up	3.13567	-	-	-	-	gi|108709311|gb|ABF97106.1|/0/retrotransposon protein, putative, Ty3-gypsy subclass, expressed [Oryza sativa Japonica Group]
TCONS_00091345	up	2.80973	LOC_Os03g36279	up	3.13567	-	-	-	-	gi|108709311|gb|ABF97106.1|/0/retrotransposon protein, putative, Ty3-gypsy subclass, expressed [Oryza sativa Japonica Group]
TCONS_00005781	up	3.08006	LOC_Os03g36279	up	3.13567	-	-	-	-	gi|108709311|gb|ABF97106.1|/0/retrotransposon protein, putative, Ty3-gypsy subclass, expressed [Oryza sativa Japonica Group]
TCONS_00005792	up	2.63888	LOC_Os03g36279	up	3.13567	-	-	-	-	gi|108709311|gb|ABF97106.1|/0/retrotransposon protein, putative, Ty3-gypsy subclass, expressed [Oryza sativa Japonica Group]
TCONS_00010868	up	2.63376	LOC_Os03g36279	up	3.13567	-	-	-	-	gi|108709311|gb|ABF97106.1|/0/retrotransposon protein, putative, Ty3-gypsy subclass, expressed [Oryza sativa Japonica Group]
TCONS_00056787	up	2.47695	LOC_Os03g36279	up	3.13567	-	-	-	-	gi|108709311|gb|ABF97106.1|/0/retrotransposon protein, putative, Ty3-gypsy subclass, expressed [Oryza sativa Japonica Group]
TCONS_00059822	up	2.24492	LOC_Os03g36279	up	3.13567	-	-	-	-	gi|108709311|gb|ABF97106.1|/0/retrotransposon protein, putative, Ty3-gypsy subclass, expressed [Oryza sativa Japonica Group]
TCONS_00065705	up	2.64989	LOC_Os10g23310	up	3.12653	ko00941//Flavonoid biosynthesis;ko00940//Phenylpropanoid biosynthesis;ko00945//Stilbenoid, diarylheptanoid and gingerol biosynthesis;ko01110//Biosynthesis of secondary metabolites	-	GO:0016747//transferase activity, transferring acyl groups other than amino-acyl groups	-	gi|78708430|gb|ABB47405.1|/0/Transferase family protein, expressed [Oryza sativa Japonica Group]
TCONS_00089479	up	3.07091	LOC_Os10g23310	up	3.12653	ko00941//Flavonoid biosynthesis;ko00940//Phenylpropanoid biosynthesis;ko00945//Stilbenoid, diarylheptanoid and gingerol biosynthesis;ko01110//Biosynthesis of secondary metabolites	-	GO:0016747//transferase activity, transferring acyl groups other than amino-acyl groups	-	gi|78708430|gb|ABB47405.1|/0/Transferase family protein, expressed [Oryza sativa Japonica Group]
TCONS_00081336	up	7.85557	LOC_Os06g47120	up	3.10647	-	-	-	-	gi|937924271|dbj|BAS99188.1|/0/Os06g0685200 [Oryza sativa Japonica Group]
TCONS_00059316	up	2.2842	LOC_Os06g47120	up	3.10647	-	-	-	-	gi|937924271|dbj|BAS99188.1|/0/Os06g0685200 [Oryza sativa Japonica Group]
TCONS_00005781	up	3.08006	LOC_Os03g08550	up	3.10456	ko04626//Plant-pathogen interaction	GO:0016021//integral component of membrane;GO:0016023//cytoplasmic, membrane-bounded vesicle	GO:0004672//protein kinase activity;GO:0005524//ATP binding	GO:0006468//protein phosphorylation	gi|1002848586|ref|XP_006649512.2|/0/PREDICTED: protein STRUBBELIG-RECEPTOR FAMILY 7-like [Oryza brachyantha]
TCONS_00056787	up	2.47695	LOC_Os03g08550	up	3.10456	ko04626//Plant-pathogen interaction	GO:0016021//integral component of membrane;GO:0016023//cytoplasmic, membrane-bounded vesicle	GO:0004672//protein kinase activity;GO:0005524//ATP binding	GO:0006468//protein phosphorylation	gi|1002848586|ref|XP_006649512.2|/0/PREDICTED: protein STRUBBELIG-RECEPTOR FAMILY 7-like [Oryza brachyantha]
TCONS_00059822	up	2.24492	LOC_Os03g08550	up	3.10456	ko04626//Plant-pathogen interaction	GO:0016021//integral component of membrane;GO:0016023//cytoplasmic, membrane-bounded vesicle	GO:0004672//protein kinase activity;GO:0005524//ATP binding	GO:0006468//protein phosphorylation	gi|1002848586|ref|XP_006649512.2|/0/PREDICTED: protein STRUBBELIG-RECEPTOR FAMILY 7-like [Oryza brachyantha]
TCONS_00065705	up	2.64989	LOC_Os04g04060	up	3.10036	ko05100//Bacterial invasion of epithelial cells;ko04961//Endocrine and other factor-regulated calcium reabsorption;ko04721//Synaptic vesicle cycle;ko04666//Fc gamma R-mediated phagocytosis;ko04144//Endocytosis	-	GO:0003924//GTPase activity;GO:0005525//GTP binding	-	gi|38344415|emb|CAE02378.2|/0/OSJNBb0080H08.3 [Oryza sativa Japonica Group]
TCONS_00081336	up	7.85557	LOC_Os03g33520	up	3.09594	ko04910//Insulin signaling pathway	GO:0009536//plastid	-	-	gi|108709147|gb|ABF96942.1|/0/Exo70 exocyst complex subunit family protein [Oryza sativa Japonica Group]
TCONS_00081336	up	7.85557	LOC_Os05g02820	up	3.08075	-	GO:0009536//plastid	-	-	gi|1002272577|ref|XP_015640591.1|/0/PREDICTED: WEB family protein At3g02930, chloroplastic-like [Oryza sativa Japonica Group]
TCONS_00065705	up	2.64989	LOC_Os08g28710	up	3.06209	ko00903//Limonene and pinene degradation;ko05142//Chagas disease (American trypanosomiasis);ko05133//Pertussis;ko05145//Toxoplasmosis;ko00642//Ethylbenzene degradation;ko00362//Benzoate degradation;ko04722//Neurotrophin signaling pathway;ko05162//Measles;ko00240//Pyrimidine metabolism;ko00051//Fructose and mannose metabolism;ko04620//Toll-like receptor signaling pathway;ko05164//Influenza A;ko011…	-	GO:0004672//protein kinase activity;GO:0005524//ATP binding	GO:0006468//protein phosphorylation	gi|1002288363|ref|XP_015648480.1|/0/PREDICTED: putative serine/threonine-protein kinase-like protein CCR3 [Oryza sativa Japonica Group]
TCONS_00081336	up	7.85557	LOC_Os08g28710	up	3.06209	ko00903//Limonene and pinene degradation;ko05142//Chagas disease (American trypanosomiasis);ko05133//Pertussis;ko05145//Toxoplasmosis;ko00642//Ethylbenzene degradation;ko00362//Benzoate degradation;ko04722//Neurotrophin signaling pathway;ko05162//Measles;ko00240//Pyrimidine metabolism;ko00051//Fructose and mannose metabolism;ko04620//Toll-like receptor signaling pathway;ko05164//Influenza A;ko011…	-	GO:0004672//protein kinase activity;GO:0005524//ATP binding	GO:0006468//protein phosphorylation	gi|1002288363|ref|XP_015648480.1|/0/PREDICTED: putative serine/threonine-protein kinase-like protein CCR3 [Oryza sativa Japonica Group]
TCONS_00089479	up	3.07091	LOC_Os08g28710	up	3.06209	ko00903//Limonene and pinene degradation;ko05142//Chagas disease (American trypanosomiasis);ko05133//Pertussis;ko05145//Toxoplasmosis;ko00642//Ethylbenzene degradation;ko00362//Benzoate degradation;ko04722//Neurotrophin signaling pathway;ko05162//Measles;ko00240//Pyrimidine metabolism;ko00051//Fructose and mannose metabolism;ko04620//Toll-like receptor signaling pathway;ko05164//Influenza A;ko011…	-	GO:0004672//protein kinase activity;GO:0005524//ATP binding	GO:0006468//protein phosphorylation	gi|1002288363|ref|XP_015648480.1|/0/PREDICTED: putative serine/threonine-protein kinase-like protein CCR3 [Oryza sativa Japonica Group]
TCONS_00089479	up	3.07091	LOC_Os10g20120	up	3.05748	ko05142//Chagas disease (American trypanosomiasis);ko05133//Pertussis;ko05145//Toxoplasmosis;ko04626//Plant-pathogen interaction;ko04075//Plant hormone signal transduction;ko04722//Neurotrophin signaling pathway;ko05162//Measles;ko04620//Toll-like receptor signaling pathway;ko05164//Influenza A;ko05140//Leishmaniasis;ko05152//Tuberculosis;ko04064//NF-kappa B signaling pathway;ko04210//Apoptosis	GO:0005886//plasma membrane;GO:0016021//integral component of membrane	GO:0030246//carbohydrate binding;GO:0005524//ATP binding;GO:0004674//protein serine/threonine kinase activity	GO:0048544//recognition of pollen;GO:0006468//protein phosphorylation	gi|31431340|gb|AAP53135.1|/0/D-mannose binding lectin family protein, expressed [Oryza sativa Japonica Group]
TCONS_00065705	up	2.64989	LOC_Os10g20120	up	3.05748	ko05142//Chagas disease (American trypanosomiasis);ko05133//Pertussis;ko05145//Toxoplasmosis;ko04626//Plant-pathogen interaction;ko04075//Plant hormone signal transduction;ko04722//Neurotrophin signaling pathway;ko05162//Measles;ko04620//Toll-like receptor signaling pathway;ko05164//Influenza A;ko05140//Leishmaniasis;ko05152//Tuberculosis;ko04064//NF-kappa B signaling pathway;ko04210//Apoptosis	GO:0005886//plasma membrane;GO:0016021//integral component of membrane	GO:0030246//carbohydrate binding;GO:0005524//ATP binding;GO:0004674//protein serine/threonine kinase activity	GO:0048544//recognition of pollen;GO:0006468//protein phosphorylation	gi|31431340|gb|AAP53135.1|/0/D-mannose binding lectin family protein, expressed [Oryza sativa Japonica Group]
TCONS_00081336	up	7.85557	LOC_Os04g44370	up	3.04429	ko03013//RNA transport;ko03008//Ribosome biogenesis in eukaryotes;ko03018//RNA degradation	GO:0071013//catalytic step 2 spliceosome	GO:0003964//RNA-directed DNA polymerase activity;GO:0003723//RNA binding	GO:0000398//mRNA splicing, via spliceosome;GO:0006278//RNA-dependent DNA biosynthetic process	gi|116310953|emb|CAH67890.1|/0/OSIGBa0153E02-OSIGBa0093I20.19 [Oryza sativa Indica Group]
TCONS_00070703	up	3.1046	LOC_Os04g05010	up	3.01806	-	GO:0009536//plastid	GO:0003824//catalytic activity	-	gi|38347506|emb|CAE02417.2|/1.32024e-141/OSJNBa0095E20.4 [Oryza sativa Japonica Group]
TCONS_00009514	up	7.62476	LOC_Os01g67820	up	3.01596	ko04910//Insulin signaling pathway	GO:0000145//exocyst	-	GO:0006887//exocytosis	gi|1002225932|ref|XP_015624439.1|/0/PREDICTED: exocyst complex component EXO70A1 [Oryza sativa Japonica Group]
TCONS_00008316	up	6.93456	LOC_Os01g67820	up	3.01596	ko04910//Insulin signaling pathway	GO:0000145//exocyst	-	GO:0006887//exocytosis	gi|1002225932|ref|XP_015624439.1|/0/PREDICTED: exocyst complex component EXO70A1 [Oryza sativa Japonica Group]
TCONS_00005781	up	3.08006	LOC_Os01g67820	up	3.01596	ko04910//Insulin signaling pathway	GO:0000145//exocyst	-	GO:0006887//exocytosis	gi|1002225932|ref|XP_015624439.1|/0/PREDICTED: exocyst complex component EXO70A1 [Oryza sativa Japonica Group]
TCONS_00056787	up	2.47695	LOC_Os06g34070	up	3.00106	ko00230//Purine metabolism;ko04142//Lysosome;ko01120//Microbial metabolism in diverse environments;ko01100//Metabolic pathways;ko00030//Pentose phosphate pathway;ko00906//Carotenoid biosynthesis;ko01110//Biosynthesis of secondary metabolites;ko00511//Other glycan degradation;ko00250//Alanine, aspartate and glutamate metabolism	GO:0005739//mitochondrion	GO:0016788//hydrolase activity, acting on ester bonds	-	gi|113595825|dbj|BAF19699.1|/0/Os06g0531600 [Oryza sativa Japonica Group]
TCONS_00065705	up	2.64989	LOC_Os08g14000	up	2.98743	ko00623//Toluene degradation;ko00361//Chlorocyclohexane and chlorobenzene degradation;ko00364//Fluorobenzoate degradation;ko01120//Microbial metabolism in diverse environments;ko01100//Metabolic pathways;ko00100//Steroid biosynthesis;ko01110//Biosynthesis of secondary metabolites	GO:0016023//cytoplasmic, membrane-bounded vesicle	GO:0016787//hydrolase activity	-	gi|113623292|dbj|BAF23237.1|/3.24782e-180/Os08g0238200 [Oryza sativa Japonica Group]
TCONS_00008924	up	2.83107	LOC_Os04g57880	up	2.98474	-	GO:0016020//membrane;GO:0009536//plastid	-	-	gi|38344928|emb|CAE03244.2|/0/OSJNBa0018M05.19 [Oryza sativa Japonica Group]
TCONS_00091345	up	2.80973	LOC_Os04g57880	up	2.98474	-	GO:0016020//membrane;GO:0009536//plastid	-	-	gi|38344928|emb|CAE03244.2|/0/OSJNBa0018M05.19 [Oryza sativa Japonica Group]
TCONS_00008316	up	6.93456	LOC_Os04g57880	up	2.98474	-	GO:0016020//membrane;GO:0009536//plastid	-	-	gi|38344928|emb|CAE03244.2|/0/OSJNBa0018M05.19 [Oryza sativa Japonica Group]
TCONS_00005781	up	3.08006	LOC_Os04g57880	up	2.98474	-	GO:0016020//membrane;GO:0009536//plastid	-	-	gi|38344928|emb|CAE03244.2|/0/OSJNBa0018M05.19 [Oryza sativa Japonica Group]
TCONS_00010868	up	2.63376	LOC_Os04g57880	up	2.98474	-	GO:0016020//membrane;GO:0009536//plastid	-	-	gi|38344928|emb|CAE03244.2|/0/OSJNBa0018M05.19 [Oryza sativa Japonica Group]
TCONS_00059822	up	2.24492	LOC_Os04g57880	up	2.98474	-	GO:0016020//membrane;GO:0009536//plastid	-	-	gi|38344928|emb|CAE03244.2|/0/OSJNBa0018M05.19 [Oryza sativa Japonica Group]
TCONS_00059316	up	2.2842	LOC_Os07g09420	up	2.97462	-	GO:0016021//integral component of membrane	GO:0005524//ATP binding	-	gi|50510113|dbj|BAD30881.1|/0/AAA-type ATPase-like [Oryza sativa Japonica Group]
TCONS_00091345	up	2.80973	LOC_Os10g36180	up	2.96521	-	-	-	-	gi|78708883|gb|ABB47858.1|/0/expressed protein [Oryza sativa Japonica Group]
TCONS_00008316	up	6.93456	LOC_Os10g36180	up	2.96521	-	-	-	-	gi|78708883|gb|ABB47858.1|/0/expressed protein [Oryza sativa Japonica Group]
TCONS_00005781	up	3.08006	LOC_Os10g36180	up	2.96521	-	-	-	-	gi|78708883|gb|ABB47858.1|/0/expressed protein [Oryza sativa Japonica Group]
TCONS_00059822	up	2.24492	LOC_Os10g36180	up	2.96521	-	-	-	-	gi|78708883|gb|ABB47858.1|/0/expressed protein [Oryza sativa Japonica Group]
TCONS_00091345	up	2.80973	LOC_Os06g14030	up	2.94829	ko04626//Plant-pathogen interaction	GO:0005887//integral component of plasma membrane	GO:0005249//voltage-gated potassium channel activity	GO:0034765//regulation of ion transmembrane transport;GO:0071805//potassium ion transmembrane transport;GO:0042391//regulation of membrane potential	gi|75114599|sp|Q653P0.1|KOR1_ORYSJ/0/RecName: Full=Potassium channel KOR1; AltName: Full=K(+) outward-rectifying channel 1
TCONS_00056787	up	2.47695	LOC_Os06g14030	up	2.94829	ko04626//Plant-pathogen interaction	GO:0005887//integral component of plasma membrane	GO:0005249//voltage-gated potassium channel activity	GO:0034765//regulation of ion transmembrane transport;GO:0071805//potassium ion transmembrane transport;GO:0042391//regulation of membrane potential	gi|75114599|sp|Q653P0.1|KOR1_ORYSJ/0/RecName: Full=Potassium channel KOR1; AltName: Full=K(+) outward-rectifying channel 1
TCONS_00059822	up	2.24492	LOC_Os06g14030	up	2.94829	ko04626//Plant-pathogen interaction	GO:0005887//integral component of plasma membrane	GO:0005249//voltage-gated potassium channel activity	GO:0034765//regulation of ion transmembrane transport;GO:0071805//potassium ion transmembrane transport;GO:0042391//regulation of membrane potential	gi|75114599|sp|Q653P0.1|KOR1_ORYSJ/0/RecName: Full=Potassium channel KOR1; AltName: Full=K(+) outward-rectifying channel 1
TCONS_00059822	up	2.24492	LOC_Os05g23924	up	2.93682	-	-	GO:0004553//hydrolase activity, hydrolyzing O-glycosyl compounds	GO:0005975//carbohydrate metabolic process	gi|1002269688|ref|XP_015639187.1|;gi|113578696|dbj|BAF17059.1|/0;0/PREDICTED: uncharacterized protein LOC4338360 isoform X2 [Oryza sativa Japonica Group];Os05g0304900 [Oryza sativa Japonica Group]
TCONS_00056787	up	2.47695	LOC_Os05g23924	up	2.93682	-	-	GO:0004553//hydrolase activity, hydrolyzing O-glycosyl compounds	GO:0005975//carbohydrate metabolic process	gi|1002269688|ref|XP_015639187.1|;gi|113578696|dbj|BAF17059.1|/0;0/PREDICTED: uncharacterized protein LOC4338360 isoform X2 [Oryza sativa Japonica Group];Os05g0304900 [Oryza sativa Japonica Group]
TCONS_00070703	up	3.1046	LOC_Os02g43740	up	2.93574	-	GO:0005737//cytoplasm;GO:0005634//nucleus;GO:0005886//plasma membrane	GO:0004674//protein serine/threonine kinase activity;GO:0005524//ATP binding	GO:0006468//protein phosphorylation;GO:0035556//intracellular signal transduction	gi|113537141|dbj|BAF09524.1|/0/Os02g0654300 [Oryza sativa Japonica Group]
TCONS_00059316	up	2.2842	LOC_Os03g55420	up	2.92781	ko00940//Phenylpropanoid biosynthesis;ko00360//Phenylalanine metabolism;ko01100//Metabolic pathways;ko01110//Biosynthesis of secondary metabolites	GO:0005576//extracellular region;GO:0016023//cytoplasmic, membrane-bounded vesicle	GO:0046872//metal ion binding;GO:0020037//heme binding;GO:0004601//peroxidase activity	GO:0098869//cellular oxidant detoxification;GO:0006979//response to oxidative stress;GO:0042744//hydrogen peroxide catabolic process;GO:0055114//oxidation-reduction process	gi|55700969|tpe|CAH69293.1|/0/TPA: class III peroxidase 51 precursor [Oryza sativa Japonica Group]
TCONS_00091345	up	2.80973	LOC_Os04g12960	up	2.92717	-	GO:0043231//intracellular membrane-bounded organelle	GO:0080043//quercetin 3-O-glucosyltransferase activity;GO:0080044//quercetin 7-O-glucosyltransferase activity	GO:0009813//flavonoid biosynthetic process;GO:0052696//flavonoid glucuronidation	gi|38345011|emb|CAD40029.2|/0/OSJNBa0052O21.14 [Oryza sativa Japonica Group]
TCONS_00010868	up	2.63376	LOC_Os04g12960	up	2.92717	-	GO:0043231//intracellular membrane-bounded organelle	GO:0080043//quercetin 3-O-glucosyltransferase activity;GO:0080044//quercetin 7-O-glucosyltransferase activity	GO:0009813//flavonoid biosynthetic process;GO:0052696//flavonoid glucuronidation	gi|38345011|emb|CAD40029.2|/0/OSJNBa0052O21.14 [Oryza sativa Japonica Group]
TCONS_00059822	up	2.24492	LOC_Os04g12960	up	2.92717	-	GO:0043231//intracellular membrane-bounded organelle	GO:0080043//quercetin 3-O-glucosyltransferase activity;GO:0080044//quercetin 7-O-glucosyltransferase activity	GO:0009813//flavonoid biosynthetic process;GO:0052696//flavonoid glucuronidation	gi|38345011|emb|CAD40029.2|/0/OSJNBa0052O21.14 [Oryza sativa Japonica Group]
TCONS_00081336	up	7.85557	LOC_Os11g25590	up	2.92568	ko03440//Homologous recombination;ko00240//Pyrimidine metabolism;ko01100//Metabolic pathways;ko03460//Fanconi anemia pathway;ko02020//Two-component system;ko02010//ABC transporters;ko00670//One carbon pool by folate	-	GO:0003676//nucleic acid binding;GO:0004190//aspartic-type endopeptidase activity;GO:0008270//zinc ion binding	GO:0006508//proteolysis;GO:0015074//DNA integration	gi|62734156|gb|AAX96265.1|/0/retrotransposon protein, putative, Ty3-gypsy sub-class [Oryza sativa Japonica Group]
TCONS_00008924	up	2.83107	LOC_Os11g19840	up	2.92367	ko00945//Stilbenoid, diarylheptanoid and gingerol biosynthesis;ko00944//Flavone and flavonol biosynthesis;ko00402//Benzoxazinoid biosynthesis	-	GO:0046983//protein dimerization activity;GO:0008757//S-adenosylmethionine-dependent methyltransferase activity;GO:0008171//O-methyltransferase activity	GO:0032259//methylation;GO:0019438//aromatic compound biosynthetic process	gi|62732812|gb|AAX94931.1|/0/O-methyltransferase [Oryza sativa Japonica Group]
TCONS_00059318	up	1.9494	LOC_Os11g19840	up	2.92367	ko00945//Stilbenoid, diarylheptanoid and gingerol biosynthesis;ko00944//Flavone and flavonol biosynthesis;ko00402//Benzoxazinoid biosynthesis	-	GO:0046983//protein dimerization activity;GO:0008757//S-adenosylmethionine-dependent methyltransferase activity;GO:0008171//O-methyltransferase activity	GO:0032259//methylation;GO:0019438//aromatic compound biosynthetic process	gi|62732812|gb|AAX94931.1|/0/O-methyltransferase [Oryza sativa Japonica Group]
TCONS_00005792	up	2.63888	LOC_Os11g19840	up	2.92367	ko00945//Stilbenoid, diarylheptanoid and gingerol biosynthesis;ko00944//Flavone and flavonol biosynthesis;ko00402//Benzoxazinoid biosynthesis	-	GO:0046983//protein dimerization activity;GO:0008757//S-adenosylmethionine-dependent methyltransferase activity;GO:0008171//O-methyltransferase activity	GO:0032259//methylation;GO:0019438//aromatic compound biosynthetic process	gi|62732812|gb|AAX94931.1|/0/O-methyltransferase [Oryza sativa Japonica Group]
TCONS_00010868	up	2.63376	LOC_Os11g19840	up	2.92367	ko00945//Stilbenoid, diarylheptanoid and gingerol biosynthesis;ko00944//Flavone and flavonol biosynthesis;ko00402//Benzoxazinoid biosynthesis	-	GO:0046983//protein dimerization activity;GO:0008757//S-adenosylmethionine-dependent methyltransferase activity;GO:0008171//O-methyltransferase activity	GO:0032259//methylation;GO:0019438//aromatic compound biosynthetic process	gi|62732812|gb|AAX94931.1|/0/O-methyltransferase [Oryza sativa Japonica Group]
TCONS_00059316	up	2.2842	LOC_Os11g19840	up	2.92367	ko00945//Stilbenoid, diarylheptanoid and gingerol biosynthesis;ko00944//Flavone and flavonol biosynthesis;ko00402//Benzoxazinoid biosynthesis	-	GO:0046983//protein dimerization activity;GO:0008757//S-adenosylmethionine-dependent methyltransferase activity;GO:0008171//O-methyltransferase activity	GO:0032259//methylation;GO:0019438//aromatic compound biosynthetic process	gi|62732812|gb|AAX94931.1|/0/O-methyltransferase [Oryza sativa Japonica Group]
TCONS_00008924	up	2.83107	LOC_Os05g46480	up	2.91242	-	-	-	-	gi|937920221|dbj|BAS95139.1|;gi|158517754|sp|P0C5A4.1|LEA3_ORYSJ/9.44612e-61;5.89533e-67/Os05g0542500 [Oryza sativa Japonica Group];RecName: Full=Late embryogenesis abundant protein, group 3; Short=LEA-3
TCONS_00091345	up	2.80973	LOC_Os05g46480	up	2.91242	-	-	-	-	gi|937920221|dbj|BAS95139.1|;gi|158517754|sp|P0C5A4.1|LEA3_ORYSJ/9.44612e-61;5.89533e-67/Os05g0542500 [Oryza sativa Japonica Group];RecName: Full=Late embryogenesis abundant protein, group 3; Short=LEA-3
TCONS_00005792	up	2.63888	LOC_Os05g46480	up	2.91242	-	-	-	-	gi|937920221|dbj|BAS95139.1|;gi|158517754|sp|P0C5A4.1|LEA3_ORYSJ/9.44612e-61;5.89533e-67/Os05g0542500 [Oryza sativa Japonica Group];RecName: Full=Late embryogenesis abundant protein, group 3; Short=LEA-3
TCONS_00010868	up	2.63376	LOC_Os05g46480	up	2.91242	-	-	-	-	gi|937920221|dbj|BAS95139.1|;gi|158517754|sp|P0C5A4.1|LEA3_ORYSJ/9.44612e-61;5.89533e-67/Os05g0542500 [Oryza sativa Japonica Group];RecName: Full=Late embryogenesis abundant protein, group 3; Short=LEA-3
TCONS_00056787	up	2.47695	LOC_Os05g46480	up	2.91242	-	-	-	-	gi|937920221|dbj|BAS95139.1|;gi|158517754|sp|P0C5A4.1|LEA3_ORYSJ/9.44612e-61;5.89533e-67/Os05g0542500 [Oryza sativa Japonica Group];RecName: Full=Late embryogenesis abundant protein, group 3; Short=LEA-3
TCONS_00059822	up	2.24492	LOC_Os05g46480	up	2.91242	-	-	-	-	gi|937920221|dbj|BAS95139.1|;gi|158517754|sp|P0C5A4.1|LEA3_ORYSJ/9.44612e-61;5.89533e-67/Os05g0542500 [Oryza sativa Japonica Group];RecName: Full=Late embryogenesis abundant protein, group 3; Short=LEA-3
TCONS_00065705	up	2.64989	LOC_Os03g55670	up	2.90627	-	GO:0009507//chloroplast	-	GO:0009793//embryo development ending in seed dormancy	gi|108711250|gb|ABF99045.1|/8.08044e-98/expressed protein [Oryza sativa Japonica Group]
TCONS_00089479	up	3.07091	LOC_Os03g55670	up	2.90627	-	GO:0009507//chloroplast	-	GO:0009793//embryo development ending in seed dormancy	gi|108711250|gb|ABF99045.1|/8.08044e-98/expressed protein [Oryza sativa Japonica Group]
TCONS_00081336	up	7.85557	LOC_Os05g03690	up	2.88736	ko03440//Homologous recombination;ko00240//Pyrimidine metabolism;ko01100//Metabolic pathways;ko02020//Two-component system;ko02010//ABC transporters;ko00670//One carbon pool by folate	-	GO:0003964//RNA-directed DNA polymerase activity;GO:0003677//DNA binding;GO:0003723//RNA binding;GO:0004190//aspartic-type endopeptidase activity;GO:0008270//zinc ion binding	GO:0006278//RNA-dependent DNA biosynthetic process;GO:0006508//proteolysis;GO:0015074//DNA integration;GO:0006310//DNA recombination	gi|57863933|gb|AAS90689.2|/0/putative polyprotein [Oryza sativa Japonica Group]
TCONS_00091345	up	2.80973	LOC_Os06g13720	up	2.8767	ko00290//Valine, leucine and isoleucine biosynthesis;ko01120//Microbial metabolism in diverse environments;ko01100//Metabolic pathways;ko00620//Pyruvate metabolism;ko01110//Biosynthesis of secondary metabolites;ko00010//Glycolysis / Gluconeogenesis;ko00650//Butanoate metabolism;ko00020//Citrate cycle (TCA cycle)	GO:0005759//mitochondrial matrix	GO:0004739//pyruvate dehydrogenase (acetyl-transferring) activity	GO:0055114//oxidation-reduction process;GO:0006086//acetyl-CoA biosynthetic process from pyruvate;GO:0006096//glycolytic process	gi|75253319|sp|Q654V6.1|ODPA2_ORYSJ/0/RecName: Full=Pyruvate dehydrogenase E1 component subunit alpha-2, mitochondrial; Short=PDHE1-A; Flags: Precursor
TCONS_00005781	up	3.08006	LOC_Os06g13720	up	2.8767	ko00290//Valine, leucine and isoleucine biosynthesis;ko01120//Microbial metabolism in diverse environments;ko01100//Metabolic pathways;ko00620//Pyruvate metabolism;ko01110//Biosynthesis of secondary metabolites;ko00010//Glycolysis / Gluconeogenesis;ko00650//Butanoate metabolism;ko00020//Citrate cycle (TCA cycle)	GO:0005759//mitochondrial matrix	GO:0004739//pyruvate dehydrogenase (acetyl-transferring) activity	GO:0055114//oxidation-reduction process;GO:0006086//acetyl-CoA biosynthetic process from pyruvate;GO:0006096//glycolytic process	gi|75253319|sp|Q654V6.1|ODPA2_ORYSJ/0/RecName: Full=Pyruvate dehydrogenase E1 component subunit alpha-2, mitochondrial; Short=PDHE1-A; Flags: Precursor
TCONS_00010868	up	2.63376	LOC_Os06g13720	up	2.8767	ko00290//Valine, leucine and isoleucine biosynthesis;ko01120//Microbial metabolism in diverse environments;ko01100//Metabolic pathways;ko00620//Pyruvate metabolism;ko01110//Biosynthesis of secondary metabolites;ko00010//Glycolysis / Gluconeogenesis;ko00650//Butanoate metabolism;ko00020//Citrate cycle (TCA cycle)	GO:0005759//mitochondrial matrix	GO:0004739//pyruvate dehydrogenase (acetyl-transferring) activity	GO:0055114//oxidation-reduction process;GO:0006086//acetyl-CoA biosynthetic process from pyruvate;GO:0006096//glycolytic process	gi|75253319|sp|Q654V6.1|ODPA2_ORYSJ/0/RecName: Full=Pyruvate dehydrogenase E1 component subunit alpha-2, mitochondrial; Short=PDHE1-A; Flags: Precursor
TCONS_00056787	up	2.47695	LOC_Os06g13720	up	2.8767	ko00290//Valine, leucine and isoleucine biosynthesis;ko01120//Microbial metabolism in diverse environments;ko01100//Metabolic pathways;ko00620//Pyruvate metabolism;ko01110//Biosynthesis of secondary metabolites;ko00010//Glycolysis / Gluconeogenesis;ko00650//Butanoate metabolism;ko00020//Citrate cycle (TCA cycle)	GO:0005759//mitochondrial matrix	GO:0004739//pyruvate dehydrogenase (acetyl-transferring) activity	GO:0055114//oxidation-reduction process;GO:0006086//acetyl-CoA biosynthetic process from pyruvate;GO:0006096//glycolytic process	gi|75253319|sp|Q654V6.1|ODPA2_ORYSJ/0/RecName: Full=Pyruvate dehydrogenase E1 component subunit alpha-2, mitochondrial; Short=PDHE1-A; Flags: Precursor
TCONS_00059822	up	2.24492	LOC_Os06g13720	up	2.8767	ko00290//Valine, leucine and isoleucine biosynthesis;ko01120//Microbial metabolism in diverse environments;ko01100//Metabolic pathways;ko00620//Pyruvate metabolism;ko01110//Biosynthesis of secondary metabolites;ko00010//Glycolysis / Gluconeogenesis;ko00650//Butanoate metabolism;ko00020//Citrate cycle (TCA cycle)	GO:0005759//mitochondrial matrix	GO:0004739//pyruvate dehydrogenase (acetyl-transferring) activity	GO:0055114//oxidation-reduction process;GO:0006086//acetyl-CoA biosynthetic process from pyruvate;GO:0006096//glycolytic process	gi|75253319|sp|Q654V6.1|ODPA2_ORYSJ/0/RecName: Full=Pyruvate dehydrogenase E1 component subunit alpha-2, mitochondrial; Short=PDHE1-A; Flags: Precursor
TCONS_00065705	up	2.64989	LOC_Os03g61160	up	2.8708	-	-	-	-	gi|108711863|gb|ABF99658.1|;gi|108711861|gb|ABF99656.1|;gi|108711865|gb|ABF99660.1|;gi|108711864|gb|ABF99659.1|;gi|108711862|gb|ABF99657.1|/4.96272e-102;7.00931e-119;9.87133e-103;5.88912e-61;1.10791e-119/expressed protein [Oryza sativa Japonica Group];expressed protein [Oryza sativa Japonica Group];expressed protein [Oryza sativa Japonica Group];expressed protein [Oryza sativa Japonica Group];exp…
TCONS_00081336	up	7.85557	LOC_Os03g61160	up	2.8708	-	-	-	-	gi|108711863|gb|ABF99658.1|;gi|108711861|gb|ABF99656.1|;gi|108711865|gb|ABF99660.1|;gi|108711864|gb|ABF99659.1|;gi|108711862|gb|ABF99657.1|/4.96272e-102;7.00931e-119;9.87133e-103;5.88912e-61;1.10791e-119/expressed protein [Oryza sativa Japonica Group];expressed protein [Oryza sativa Japonica Group];expressed protein [Oryza sativa Japonica Group];expressed protein [Oryza sativa Japonica Group];exp…
TCONS_00089479	up	3.07091	LOC_Os03g61160	up	2.8708	-	-	-	-	gi|108711863|gb|ABF99658.1|;gi|108711861|gb|ABF99656.1|;gi|108711865|gb|ABF99660.1|;gi|108711864|gb|ABF99659.1|;gi|108711862|gb|ABF99657.1|/4.96272e-102;7.00931e-119;9.87133e-103;5.88912e-61;1.10791e-119/expressed protein [Oryza sativa Japonica Group];expressed protein [Oryza sativa Japonica Group];expressed protein [Oryza sativa Japonica Group];expressed protein [Oryza sativa Japonica Group];exp…
TCONS_00056787	up	2.47695	LOC_Os02g37590	up	2.86859	ko00564//Glycerophospholipid metabolism;ko00600//Sphingolipid metabolism;ko00511//Other glycan degradation	GO:0016023//cytoplasmic, membrane-bounded vesicle	GO:0008889//glycerophosphodiester phosphodiesterase activity	GO:0006629//lipid metabolic process	gi|113536806|dbj|BAF09189.1|/0/Os02g0588500 [Oryza sativa Japonica Group]
TCONS_00065705	up	2.64989	LOC_Os02g37720	up	2.85658	-	-	-	-	gi|77554254|gb|ABA97050.1|/0/transposon protein, putative, CACTA, En/Spm sub-class [Oryza sativa Japonica Group]
TCONS_00070703	up	3.1046	LOC_Os09g26420	up	2.85595	-	GO:0005634//nucleus	GO:0003700//transcription factor activity, sequence-specific DNA binding;GO:0003677//DNA binding	GO:0006351//transcription, DNA-templated;GO:0006355//regulation of transcription, DNA-templated	gi|194396113|gb|ACF60474.1|/0/EREBP transcription factor [Oryza sativa Japonica Group]
TCONS_00065705	up	2.64989	LOC_Os03g18030	up	2.85567	ko00941//Flavonoid biosynthesis;ko01100//Metabolic pathways;ko01110//Biosynthesis of secondary metabolites	-	GO:0051213//dioxygenase activity;GO:0005506//iron ion binding	GO:0055114//oxidation-reduction process	gi|125543430|gb|EAY89569.1|;gi|125543432|gb|EAY89571.1|/0;9.746e-173/hypothetical protein OsI_11101 [Oryza sativa Indica Group];hypothetical protein OsI_11102 [Oryza sativa Indica Group]
TCONS_00065705	up	2.64989	LOC_Os02g42780	up	2.85361	ko00903//Limonene and pinene degradation;ko05142//Chagas disease (American trypanosomiasis);ko05133//Pertussis;ko05145//Toxoplasmosis;ko00642//Ethylbenzene degradation;ko00362//Benzoate degradation;ko04722//Neurotrophin signaling pathway;ko05162//Measles;ko00240//Pyrimidine metabolism;ko00051//Fructose and mannose metabolism;ko04620//Toll-like receptor signaling pathway;ko04976//Bile secretion;ko…	GO:0016021//integral component of membrane;GO:0016023//cytoplasmic, membrane-bounded vesicle	GO:0030246//carbohydrate binding;GO:0005524//ATP binding;GO:0004674//protein serine/threonine kinase activity	GO:0006468//protein phosphorylation	gi|113537078|dbj|BAF09461.1|/0/Os02g0640500 [Oryza sativa Japonica Group]
TCONS_00089479	up	3.07091	LOC_Os02g42780	up	2.85361	ko00903//Limonene and pinene degradation;ko05142//Chagas disease (American trypanosomiasis);ko05133//Pertussis;ko05145//Toxoplasmosis;ko00642//Ethylbenzene degradation;ko00362//Benzoate degradation;ko04722//Neurotrophin signaling pathway;ko05162//Measles;ko00240//Pyrimidine metabolism;ko00051//Fructose and mannose metabolism;ko04620//Toll-like receptor signaling pathway;ko04976//Bile secretion;ko…	GO:0016021//integral component of membrane;GO:0016023//cytoplasmic, membrane-bounded vesicle	GO:0030246//carbohydrate binding;GO:0005524//ATP binding;GO:0004674//protein serine/threonine kinase activity	GO:0006468//protein phosphorylation	gi|113537078|dbj|BAF09461.1|/0/Os02g0640500 [Oryza sativa Japonica Group]
TCONS_00081336	up	7.85557	LOC_Os04g43680	up	2.84392	-	-	-	-	gi|73921025|sp|Q7XBH4.2|MYB4_ORYSJ/2.79143e-140/RecName: Full=Myb-related protein Myb4; AltName: Full=OsMyb4; AltName: Full=Transcription factor RLTR1
TCONS_00065705	up	2.64989	LOC_Os12g26790	up	2.84013	ko03440//Homologous recombination;ko00240//Pyrimidine metabolism;ko01100//Metabolic pathways;ko03460//Fanconi anemia pathway;ko02020//Two-component system;ko02010//ABC transporters;ko00670//One carbon pool by folate	-	GO:0003676//nucleic acid binding;GO:0004190//aspartic-type endopeptidase activity;GO:0008270//zinc ion binding	GO:0006508//proteolysis;GO:0015074//DNA integration	gi|77555315|gb|ABA98111.1|/0/retrotransposon protein, putative, Ty3-gypsy subclass [Oryza sativa Japonica Group]
TCONS_00081336	up	7.85557	LOC_Os12g26790	up	2.84013	ko03440//Homologous recombination;ko00240//Pyrimidine metabolism;ko01100//Metabolic pathways;ko03460//Fanconi anemia pathway;ko02020//Two-component system;ko02010//ABC transporters;ko00670//One carbon pool by folate	-	GO:0003676//nucleic acid binding;GO:0004190//aspartic-type endopeptidase activity;GO:0008270//zinc ion binding	GO:0006508//proteolysis;GO:0015074//DNA integration	gi|77555315|gb|ABA98111.1|/0/retrotransposon protein, putative, Ty3-gypsy subclass [Oryza sativa Japonica Group]
TCONS_00089479	up	3.07091	LOC_Os12g26790	up	2.84013	ko03440//Homologous recombination;ko00240//Pyrimidine metabolism;ko01100//Metabolic pathways;ko03460//Fanconi anemia pathway;ko02020//Two-component system;ko02010//ABC transporters;ko00670//One carbon pool by folate	-	GO:0003676//nucleic acid binding;GO:0004190//aspartic-type endopeptidase activity;GO:0008270//zinc ion binding	GO:0006508//proteolysis;GO:0015074//DNA integration	gi|77555315|gb|ABA98111.1|/0/retrotransposon protein, putative, Ty3-gypsy subclass [Oryza sativa Japonica Group]
TCONS_00065705	up	2.64989	LOC_Os10g39680	up	2.83782	ko00500//Starch and sucrose metabolism;ko00520//Amino sugar and nucleotide sugar metabolism;ko01100//Metabolic pathways;ko01110//Biosynthesis of secondary metabolites	GO:0016023//cytoplasmic, membrane-bounded vesicle	GO:0004568//chitinase activity	GO:0006032//chitin catabolic process;GO:0000272//polysaccharide catabolic process;GO:0016998//cell wall macromolecule catabolic process	gi|75141289|sp|Q7XCK6.1|CHI8_ORYSJ/2.38761e-172/RecName: Full=Chitinase 8; AltName: Full=Class II chitinase a; Short=OsChia2a; AltName: Full=Pathogenesis related (PR)-3 chitinase 8; Flags: Precursor
TCONS_00065705	up	2.64989	LOC_Os08g05780	up	2.81942	-	GO:0016021//integral component of membrane	-	-	gi|113622980|dbj|BAF22925.1|/3.43216e-174/Os08g0153900 [Oryza sativa Japonica Group]
TCONS_00009514	up	7.62476	LOC_Os11g04830	up	2.80175	-	GO:0016021//integral component of membrane	-	GO:0007165//signal transduction	gi|77548641|gb|ABA91438.1|/0/expressed protein [Oryza sativa Japonica Group]
TCONS_00008316	up	6.93456	LOC_Os11g04830	up	2.80175	-	GO:0016021//integral component of membrane	-	GO:0007165//signal transduction	gi|77548641|gb|ABA91438.1|/0/expressed protein [Oryza sativa Japonica Group]
TCONS_00081336	up	7.85557	LOC_Os02g30300	up	2.80043	-	-	-	-	gi|48716133|dbj|BAD23173.1|/1.24694e-162/F-box protein-like [Oryza sativa Japonica Group]
TCONS_00059316	up	2.2842	LOC_Os02g30300	up	2.80043	-	-	-	-	gi|48716133|dbj|BAD23173.1|/1.24694e-162/F-box protein-like [Oryza sativa Japonica Group]
TCONS_00056787	up	2.47695	LOC_Os10g37340	up	2.78575	ko00450//Selenocompound metabolism;ko00270//Cysteine and methionine metabolism	GO:0005829//cytosol	GO:0030170//pyridoxal phosphate binding;GO:0018826//methionine gamma-lyase activity	GO:0051289//protein homotetramerization	gi|31433074|gb|AAP54634.1|/0/Cys/Met metabolism PLP-dependent enzyme family protein, expressed [Oryza sativa Japonica Group]
TCONS_00059822	up	2.24492	LOC_Os10g37340	up	2.78575	ko00450//Selenocompound metabolism;ko00270//Cysteine and methionine metabolism	GO:0005829//cytosol	GO:0030170//pyridoxal phosphate binding;GO:0018826//methionine gamma-lyase activity	GO:0051289//protein homotetramerization	gi|31433074|gb|AAP54634.1|/0/Cys/Met metabolism PLP-dependent enzyme family protein, expressed [Oryza sativa Japonica Group]
TCONS_00008924	up	2.83107	LOC_Os09g34160	up	2.78303	ko04626//Plant-pathogen interaction	-	-	-	gi|937934061|dbj|BAT08976.1|/0/Os09g0517200 [Oryza sativa Japonica Group]
TCONS_00091345	up	2.80973	LOC_Os09g34160	up	2.78303	ko04626//Plant-pathogen interaction	-	-	-	gi|937934061|dbj|BAT08976.1|/0/Os09g0517200 [Oryza sativa Japonica Group]
TCONS_00005781	up	3.08006	LOC_Os09g34160	up	2.78303	ko04626//Plant-pathogen interaction	-	-	-	gi|937934061|dbj|BAT08976.1|/0/Os09g0517200 [Oryza sativa Japonica Group]
TCONS_00056787	up	2.47695	LOC_Os09g34160	up	2.78303	ko04626//Plant-pathogen interaction	-	-	-	gi|937934061|dbj|BAT08976.1|/0/Os09g0517200 [Oryza sativa Japonica Group]
TCONS_00059822	up	2.24492	LOC_Os09g34160	up	2.78303	ko04626//Plant-pathogen interaction	-	-	-	gi|937934061|dbj|BAT08976.1|/0/Os09g0517200 [Oryza sativa Japonica Group]
TCONS_00008924	up	2.83107	LOC_Os04g49980	up	2.76004	-	-	-	-	gi|38346714|emb|CAE04864.2|/7.77782e-48/OSJNBa0086O06.12 [Oryza sativa Japonica Group]
TCONS_00091345	up	2.80973	LOC_Os04g49980	up	2.76004	-	-	-	-	gi|38346714|emb|CAE04864.2|/7.77782e-48/OSJNBa0086O06.12 [Oryza sativa Japonica Group]
TCONS_00059822	up	2.24492	LOC_Os04g49980	up	2.76004	-	-	-	-	gi|38346714|emb|CAE04864.2|/7.77782e-48/OSJNBa0086O06.12 [Oryza sativa Japonica Group]
TCONS_00005792	up	2.63888	LOC_Os04g49980	up	2.76004	-	-	-	-	gi|38346714|emb|CAE04864.2|/7.77782e-48/OSJNBa0086O06.12 [Oryza sativa Japonica Group]
TCONS_00010868	up	2.63376	LOC_Os04g49980	up	2.76004	-	-	-	-	gi|38346714|emb|CAE04864.2|/7.77782e-48/OSJNBa0086O06.12 [Oryza sativa Japonica Group]
TCONS_00056787	up	2.47695	LOC_Os04g49980	up	2.76004	-	-	-	-	gi|38346714|emb|CAE04864.2|/7.77782e-48/OSJNBa0086O06.12 [Oryza sativa Japonica Group]
TCONS_00059316	up	2.2842	LOC_Os04g49980	up	2.76004	-	-	-	-	gi|38346714|emb|CAE04864.2|/7.77782e-48/OSJNBa0086O06.12 [Oryza sativa Japonica Group]
TCONS_00059316	up	2.2842	LOC_Os12g39630	up	2.75751	ko04075//Plant hormone signal transduction	GO:0005737//cytoplasm;GO:0005634//nucleus	GO:0004674//protein serine/threonine kinase activity;GO:0005524//ATP binding	GO:0006468//protein phosphorylation;GO:0035556//intracellular signal transduction;GO:0009738//abscisic acid-activated signaling pathway	gi|71153748|sp|Q75V57.1|SAPK9_ORYSJ/0/RecName: Full=Serine/threonine-protein kinase SAPK9; AltName: Full=Osmotic stress/abscisic acid-activated protein kinase 9
TCONS_00008924	up	2.83107	LOC_Os08g31850	up	2.75625	-	-	-	-	gi|113623765|dbj|BAF23710.1|/0/Os08g0412700 [Oryza sativa Japonica Group]
TCONS_00091345	up	2.80973	LOC_Os08g31850	up	2.75625	-	-	-	-	gi|113623765|dbj|BAF23710.1|/0/Os08g0412700 [Oryza sativa Japonica Group]
TCONS_00005792	up	2.63888	LOC_Os08g31850	up	2.75625	-	-	-	-	gi|113623765|dbj|BAF23710.1|/0/Os08g0412700 [Oryza sativa Japonica Group]
TCONS_00010868	up	2.63376	LOC_Os08g31850	up	2.75625	-	-	-	-	gi|113623765|dbj|BAF23710.1|/0/Os08g0412700 [Oryza sativa Japonica Group]
TCONS_00056787	up	2.47695	LOC_Os08g31850	up	2.75625	-	-	-	-	gi|113623765|dbj|BAF23710.1|/0/Os08g0412700 [Oryza sativa Japonica Group]
TCONS_00059822	up	2.24492	LOC_Os08g31850	up	2.75625	-	-	-	-	gi|113623765|dbj|BAF23710.1|/0/Os08g0412700 [Oryza sativa Japonica Group]
TCONS_00065705	up	2.64989	LOC_Os09g27040	up	2.75268	-	GO:0016021//integral component of membrane;GO:0016023//cytoplasmic, membrane-bounded vesicle	-	-	gi|113631523|dbj|BAF25204.1|/0/Os09g0442400 [Oryza sativa Japonica Group]
TCONS_00089479	up	3.07091	LOC_Os09g27040	up	2.75268	-	GO:0016021//integral component of membrane;GO:0016023//cytoplasmic, membrane-bounded vesicle	-	-	gi|113631523|dbj|BAF25204.1|/0/Os09g0442400 [Oryza sativa Japonica Group]
TCONS_00008924	up	2.83107	LOC_Os05g31020	up	2.71688	ko03015//mRNA surveillance pathway	GO:0005737//cytoplasm	GO:0016149//translation release factor activity, codon specific	GO:0006415//translational termination	gi|113578921|dbj|BAF17284.1|/0/Os05g0373900 [Oryza sativa Japonica Group]
TCONS_00091345	up	2.80973	LOC_Os05g31020	up	2.71688	ko03015//mRNA surveillance pathway	GO:0005737//cytoplasm	GO:0016149//translation release factor activity, codon specific	GO:0006415//translational termination	gi|113578921|dbj|BAF17284.1|/0/Os05g0373900 [Oryza sativa Japonica Group]
TCONS_00005781	up	3.08006	LOC_Os05g31020	up	2.71688	ko03015//mRNA surveillance pathway	GO:0005737//cytoplasm	GO:0016149//translation release factor activity, codon specific	GO:0006415//translational termination	gi|113578921|dbj|BAF17284.1|/0/Os05g0373900 [Oryza sativa Japonica Group]
TCONS_00005792	up	2.63888	LOC_Os05g31020	up	2.71688	ko03015//mRNA surveillance pathway	GO:0005737//cytoplasm	GO:0016149//translation release factor activity, codon specific	GO:0006415//translational termination	gi|113578921|dbj|BAF17284.1|/0/Os05g0373900 [Oryza sativa Japonica Group]
TCONS_00010868	up	2.63376	LOC_Os05g31020	up	2.71688	ko03015//mRNA surveillance pathway	GO:0005737//cytoplasm	GO:0016149//translation release factor activity, codon specific	GO:0006415//translational termination	gi|113578921|dbj|BAF17284.1|/0/Os05g0373900 [Oryza sativa Japonica Group]
TCONS_00056787	up	2.47695	LOC_Os05g31020	up	2.71688	ko03015//mRNA surveillance pathway	GO:0005737//cytoplasm	GO:0016149//translation release factor activity, codon specific	GO:0006415//translational termination	gi|113578921|dbj|BAF17284.1|/0/Os05g0373900 [Oryza sativa Japonica Group]
TCONS_00059822	up	2.24492	LOC_Os05g31020	up	2.71688	ko03015//mRNA surveillance pathway	GO:0005737//cytoplasm	GO:0016149//translation release factor activity, codon specific	GO:0006415//translational termination	gi|113578921|dbj|BAF17284.1|/0/Os05g0373900 [Oryza sativa Japonica Group]
TCONS_00059318	up	1.9494	LOC_Os01g12820	up	2.71501	-	GO:0016021//integral component of membrane	-	-	gi|113532009|dbj|BAF04392.1|/2.94311e-159/Os01g0228500 [Oryza sativa Japonica Group]
TCONS_00010868	up	2.63376	LOC_Os01g12820	up	2.71501	-	GO:0016021//integral component of membrane	-	-	gi|113532009|dbj|BAF04392.1|/2.94311e-159/Os01g0228500 [Oryza sativa Japonica Group]
TCONS_00059316	up	2.2842	LOC_Os01g12820	up	2.71501	-	GO:0016021//integral component of membrane	-	-	gi|113532009|dbj|BAF04392.1|/2.94311e-159/Os01g0228500 [Oryza sativa Japonica Group]
TCONS_00065705	up	2.64989	LOC_Os05g33400	up	2.71468	-	GO:0016023//cytoplasmic, membrane-bounded vesicle	GO:0004190//aspartic-type endopeptidase activity	GO:0030163//protein catabolic process;GO:0006508//proteolysis	gi|113579047|dbj|BAF17410.1|/0/Os05g0402900 [Oryza sativa Japonica Group]
TCONS_00089479	up	3.07091	LOC_Os05g33400	up	2.71468	-	GO:0016023//cytoplasmic, membrane-bounded vesicle	GO:0004190//aspartic-type endopeptidase activity	GO:0030163//protein catabolic process;GO:0006508//proteolysis	gi|113579047|dbj|BAF17410.1|/0/Os05g0402900 [Oryza sativa Japonica Group]
TCONS_00070703	up	3.1046	LOC_Os06g18140	up	2.70298	ko00943//Isoflavonoid biosynthesis;ko00940//Phenylpropanoid biosynthesis	GO:0043231//intracellular membrane-bounded organelle	GO:0080043//quercetin 3-O-glucosyltransferase activity;GO:0080044//quercetin 7-O-glucosyltransferase activity	GO:0009813//flavonoid biosynthetic process;GO:0052696//flavonoid glucuronidation	gi|113595456|dbj|BAF19330.1|/0/Os06g0289200 [Oryza sativa Japonica Group]
TCONS_00056787	up	2.47695	LOC_Os01g56330	up	2.70029	ko00903//Limonene and pinene degradation;ko05142//Chagas disease (American trypanosomiasis);ko05133//Pertussis;ko05145//Toxoplasmosis;ko04626//Plant-pathogen interaction;ko00642//Ethylbenzene degradation;ko00362//Benzoate degradation;ko04722//Neurotrophin signaling pathway;ko05162//Measles;ko00240//Pyrimidine metabolism;ko00051//Fructose and mannose metabolism;ko04620//Toll-like receptor signalin…	GO:0016021//integral component of membrane;GO:0016023//cytoplasmic, membrane-bounded vesicle	GO:0005524//ATP binding;GO:0004674//protein serine/threonine kinase activity	GO:0006468//protein phosphorylation	gi|113533903|dbj|BAF06286.1|/0/Os01g0769700 [Oryza sativa Japonica Group]
TCONS_00005781	up	3.08006	LOC_Os03g52910	up	2.69187	-	GO:0016021//integral component of membrane	-	-	gi|108710985|gb|ABF98780.1|/0/expressed protein [Oryza sativa Japonica Group]
TCONS_00056787	up	2.47695	LOC_Os03g52910	up	2.69187	-	GO:0016021//integral component of membrane	-	-	gi|108710985|gb|ABF98780.1|/0/expressed protein [Oryza sativa Japonica Group]
TCONS_00059822	up	2.24492	LOC_Os03g52910	up	2.69187	-	GO:0016021//integral component of membrane	-	-	gi|108710985|gb|ABF98780.1|/0/expressed protein [Oryza sativa Japonica Group]
TCONS_00008924	up	2.83107	LOC_Os01g50910	up	2.6915	-	-	-	-	gi|13872923|dbj|BAB44029.1|/1.83624e-76/WSI18 protein induced by water stress [Oryza sativa Japonica Group]
TCONS_00091345	up	2.80973	LOC_Os01g50910	up	2.6915	-	-	-	-	gi|13872923|dbj|BAB44029.1|/1.83624e-76/WSI18 protein induced by water stress [Oryza sativa Japonica Group]
TCONS_00059822	up	2.24492	LOC_Os01g50910	up	2.6915	-	-	-	-	gi|13872923|dbj|BAB44029.1|/1.83624e-76/WSI18 protein induced by water stress [Oryza sativa Japonica Group]
TCONS_00059318	up	1.9494	LOC_Os01g50910	up	2.6915	-	-	-	-	gi|13872923|dbj|BAB44029.1|/1.83624e-76/WSI18 protein induced by water stress [Oryza sativa Japonica Group]
TCONS_00005792	up	2.63888	LOC_Os01g50910	up	2.6915	-	-	-	-	gi|13872923|dbj|BAB44029.1|/1.83624e-76/WSI18 protein induced by water stress [Oryza sativa Japonica Group]
TCONS_00010868	up	2.63376	LOC_Os01g50910	up	2.6915	-	-	-	-	gi|13872923|dbj|BAB44029.1|/1.83624e-76/WSI18 protein induced by water stress [Oryza sativa Japonica Group]
TCONS_00056787	up	2.47695	LOC_Os01g50910	up	2.6915	-	-	-	-	gi|13872923|dbj|BAB44029.1|/1.83624e-76/WSI18 protein induced by water stress [Oryza sativa Japonica Group]
TCONS_00059316	up	2.2842	LOC_Os01g50910	up	2.6915	-	-	-	-	gi|13872923|dbj|BAB44029.1|/1.83624e-76/WSI18 protein induced by water stress [Oryza sativa Japonica Group]
TCONS_00081336	up	7.85557	LOC_Os03g02874	up	2.68934	-	-	-	-	gi|255678726|dbj|BAH94471.1|;gi|255677297|dbj|BAH93669.1|/4.56169e-20;8.82629e-51/Os09g0269500 [Oryza sativa Japonica Group];Os06g0662550, partial [Oryza sativa Japonica Group]
TCONS_00009514	up	7.62476	LOC_Os02g52010	up	2.6875	-	-	-	-	gi|113537701|dbj|BAF10084.1|/0/Os02g0756800 [Oryza sativa Japonica Group]
TCONS_00008316	up	6.93456	LOC_Os02g52010	up	2.6875	-	-	-	-	gi|113537701|dbj|BAF10084.1|/0/Os02g0756800 [Oryza sativa Japonica Group]
TCONS_00059822	up	2.24492	LOC_Os02g52010	up	2.6875	-	-	-	-	gi|113537701|dbj|BAF10084.1|/0/Os02g0756800 [Oryza sativa Japonica Group]
TCONS_00065705	up	2.64989	LOC_Os05g19740	up	2.68642	ko03440//Homologous recombination;ko00240//Pyrimidine metabolism;ko01100//Metabolic pathways;ko03460//Fanconi anemia pathway;ko02020//Two-component system;ko02010//ABC transporters;ko00670//One carbon pool by folate	GO:0009536//plastid	GO:0003964//RNA-directed DNA polymerase activity;GO:0003676//nucleic acid binding;GO:0004190//aspartic-type endopeptidase activity;GO:0008270//zinc ion binding	GO:0006278//RNA-dependent DNA biosynthetic process;GO:0006508//proteolysis;GO:0015074//DNA integration	gi|38344617|emb|CAE02516.2|/0/OSJNBb0003A12.3 [Oryza sativa Japonica Group]
TCONS_00008924	up	2.83107	LOC_Os12g12080	up	2.67446	-	-	-	-	gi|108862346|gb|ABG21920.1|;gi|108862348|gb|ABG21921.1|;gi|108862347|gb|ABA96768.2|;gi|108862345|gb|ABG21919.1|/1.6336e-85;9.39052e-53;3.70414e-86;2.57825e-46/expressed protein [Oryza sativa Japonica Group];expressed protein [Oryza sativa Japonica Group];expressed protein [Oryza sativa Japonica Group];expressed protein [Oryza sativa Japonica Group]
TCONS_00091345	up	2.80973	LOC_Os12g12080	up	2.67446	-	-	-	-	gi|108862346|gb|ABG21920.1|;gi|108862348|gb|ABG21921.1|;gi|108862347|gb|ABA96768.2|;gi|108862345|gb|ABG21919.1|/1.6336e-85;9.39052e-53;3.70414e-86;2.57825e-46/expressed protein [Oryza sativa Japonica Group];expressed protein [Oryza sativa Japonica Group];expressed protein [Oryza sativa Japonica Group];expressed protein [Oryza sativa Japonica Group]
TCONS_00005792	up	2.63888	LOC_Os12g12080	up	2.67446	-	-	-	-	gi|108862346|gb|ABG21920.1|;gi|108862348|gb|ABG21921.1|;gi|108862347|gb|ABA96768.2|;gi|108862345|gb|ABG21919.1|/1.6336e-85;9.39052e-53;3.70414e-86;2.57825e-46/expressed protein [Oryza sativa Japonica Group];expressed protein [Oryza sativa Japonica Group];expressed protein [Oryza sativa Japonica Group];expressed protein [Oryza sativa Japonica Group]
TCONS_00010868	up	2.63376	LOC_Os12g12080	up	2.67446	-	-	-	-	gi|108862346|gb|ABG21920.1|;gi|108862348|gb|ABG21921.1|;gi|108862347|gb|ABA96768.2|;gi|108862345|gb|ABG21919.1|/1.6336e-85;9.39052e-53;3.70414e-86;2.57825e-46/expressed protein [Oryza sativa Japonica Group];expressed protein [Oryza sativa Japonica Group];expressed protein [Oryza sativa Japonica Group];expressed protein [Oryza sativa Japonica Group]
TCONS_00056787	up	2.47695	LOC_Os12g12080	up	2.67446	-	-	-	-	gi|108862346|gb|ABG21920.1|;gi|108862348|gb|ABG21921.1|;gi|108862347|gb|ABA96768.2|;gi|108862345|gb|ABG21919.1|/1.6336e-85;9.39052e-53;3.70414e-86;2.57825e-46/expressed protein [Oryza sativa Japonica Group];expressed protein [Oryza sativa Japonica Group];expressed protein [Oryza sativa Japonica Group];expressed protein [Oryza sativa Japonica Group]
TCONS_00059822	up	2.24492	LOC_Os12g12080	up	2.67446	-	-	-	-	gi|108862346|gb|ABG21920.1|;gi|108862348|gb|ABG21921.1|;gi|108862347|gb|ABA96768.2|;gi|108862345|gb|ABG21919.1|/1.6336e-85;9.39052e-53;3.70414e-86;2.57825e-46/expressed protein [Oryza sativa Japonica Group];expressed protein [Oryza sativa Japonica Group];expressed protein [Oryza sativa Japonica Group];expressed protein [Oryza sativa Japonica Group]
TCONS_00065705	up	2.64989	LOC_Os08g29980	up	2.66971	ko05166//HTLV-I infection;ko04115//p53 signaling pathway;ko00900//Terpenoid backbone biosynthesis;ko04110//Cell cycle;ko00908//Zeatin biosynthesis;ko05202//Transcriptional misregulation in cancer;ko01100//Metabolic pathways;ko03008//Ribosome biogenesis in eukaryotes;ko04064//NF-kappa B signaling pathway;ko01110//Biosynthesis of secondary metabolites;ko04210//Apoptosis;ko03018//RNA degradation	-	GO:0005488	-	gi|113623687|dbj|BAF23632.1|/0/Os08g0389500 [Oryza sativa Japonica Group]
TCONS_00089479	up	3.07091	LOC_Os08g29980	up	2.66971	ko05166//HTLV-I infection;ko04115//p53 signaling pathway;ko00900//Terpenoid backbone biosynthesis;ko04110//Cell cycle;ko00908//Zeatin biosynthesis;ko05202//Transcriptional misregulation in cancer;ko01100//Metabolic pathways;ko03008//Ribosome biogenesis in eukaryotes;ko04064//NF-kappa B signaling pathway;ko01110//Biosynthesis of secondary metabolites;ko04210//Apoptosis;ko03018//RNA degradation	-	GO:0005488	-	gi|113623687|dbj|BAF23632.1|/0/Os08g0389500 [Oryza sativa Japonica Group]
TCONS_00091345	up	2.80973	LOC_Os03g10640	up	2.66409	ko00230//Purine metabolism	GO:0043231//intracellular membrane-bounded organelle;GO:0005887//integral component of plasma membrane	GO:0005388//calcium-transporting ATPase activity;GO:0005516//calmodulin binding;GO:0046872//metal ion binding;GO:0005524//ATP binding	GO:0070588//calcium ion transmembrane transport	gi|113547778|dbj|BAF11221.1|/0/Os03g0203700 [Oryza sativa Japonica Group]
TCONS_00008316	up	6.93456	LOC_Os03g10640	up	2.66409	ko00230//Purine metabolism	GO:0043231//intracellular membrane-bounded organelle;GO:0005887//integral component of plasma membrane	GO:0005388//calcium-transporting ATPase activity;GO:0005516//calmodulin binding;GO:0046872//metal ion binding;GO:0005524//ATP binding	GO:0070588//calcium ion transmembrane transport	gi|113547778|dbj|BAF11221.1|/0/Os03g0203700 [Oryza sativa Japonica Group]
TCONS_00005781	up	3.08006	LOC_Os03g10640	up	2.66409	ko00230//Purine metabolism	GO:0043231//intracellular membrane-bounded organelle;GO:0005887//integral component of plasma membrane	GO:0005388//calcium-transporting ATPase activity;GO:0005516//calmodulin binding;GO:0046872//metal ion binding;GO:0005524//ATP binding	GO:0070588//calcium ion transmembrane transport	gi|113547778|dbj|BAF11221.1|/0/Os03g0203700 [Oryza sativa Japonica Group]
TCONS_00059822	up	2.24492	LOC_Os03g10640	up	2.66409	ko00230//Purine metabolism	GO:0043231//intracellular membrane-bounded organelle;GO:0005887//integral component of plasma membrane	GO:0005388//calcium-transporting ATPase activity;GO:0005516//calmodulin binding;GO:0046872//metal ion binding;GO:0005524//ATP binding	GO:0070588//calcium ion transmembrane transport	gi|113547778|dbj|BAF11221.1|/0/Os03g0203700 [Oryza sativa Japonica Group]
TCONS_00065705	up	2.64989	LOC_Os05g08080	up	2.65826	-	-	GO:0008270//zinc ion binding	-	gi|52353740|gb|AAU44306.1|/0/putative polyprotein [Oryza sativa Japonica Group]
TCONS_00089479	up	3.07091	LOC_Os05g08080	up	2.65826	-	-	GO:0008270//zinc ion binding	-	gi|52353740|gb|AAU44306.1|/0/putative polyprotein [Oryza sativa Japonica Group]
TCONS_00081336	up	7.85557	LOC_Os02g51230	up	2.65254	-	GO:0009536//plastid	GO:0008234//cysteine-type peptidase activity	GO:0006508//proteolysis	gi|58531971|emb|CAE03081.3|/0/OSJNBa0089E12.19 [Oryza sativa Japonica Group]
TCONS_00059316	up	2.2842	LOC_Os02g51230	up	2.65254	-	GO:0009536//plastid	GO:0008234//cysteine-type peptidase activity	GO:0006508//proteolysis	gi|58531971|emb|CAE03081.3|/0/OSJNBa0089E12.19 [Oryza sativa Japonica Group]
TCONS_00070703	up	3.1046	LOC_Os03g59430	up	2.64977	ko00052//Galactose metabolism	-	GO:0047274//galactinol-sucrose galactosyltransferase activity	-	gi|108711674|gb|ABF99469.1|/0/Raffinose synthase or seed imbibition protein Sip1 containing protein, expressed [Oryza sativa Japonica Group]
TCONS_00056787	up	2.47695	LOC_Os12g13380	up	2.64834	ko00230//Purine metabolism;ko00240//Pyrimidine metabolism;ko01100//Metabolic pathways;ko01110//Biosynthesis of secondary metabolites	GO:0005737//cytoplasm	GO:0004017//adenylate kinase activity;GO:0005524//ATP binding	GO:0006163//purine nucleotide metabolic process;GO:0046939//nucleotide phosphorylation	gi|585337|sp|Q08479.1|KAD3_ORYSJ/7.3954e-178/RecName: Full=Adenylate kinase 3; AltName: Full=ATP-AMP transphosphorylase 3; AltName: Full=ATP:AMP phosphotransferase; AltName: Full=Adenylate kinase A; Short=AK A; AltName: Full=Adenylate monophosphate kinase 3
TCONS_00059822	up	2.24492	LOC_Os12g13380	up	2.64834	ko00230//Purine metabolism;ko00240//Pyrimidine metabolism;ko01100//Metabolic pathways;ko01110//Biosynthesis of secondary metabolites	GO:0005737//cytoplasm	GO:0004017//adenylate kinase activity;GO:0005524//ATP binding	GO:0006163//purine nucleotide metabolic process;GO:0046939//nucleotide phosphorylation	gi|585337|sp|Q08479.1|KAD3_ORYSJ/7.3954e-178/RecName: Full=Adenylate kinase 3; AltName: Full=ATP-AMP transphosphorylase 3; AltName: Full=ATP:AMP phosphotransferase; AltName: Full=Adenylate kinase A; Short=AK A; AltName: Full=Adenylate monophosphate kinase 3
TCONS_00065705	up	2.64989	LOC_Os02g22160	up	2.64828	-	GO:0016021//integral component of membrane	GO:0008375//acetylglucosaminyltransferase activity	-	gi|113536242|dbj|BAF08625.1|/0/Os02g0327500 [Oryza sativa Japonica Group]
TCONS_00089479	up	3.07091	LOC_Os02g22160	up	2.64828	-	GO:0016021//integral component of membrane	GO:0008375//acetylglucosaminyltransferase activity	-	gi|113536242|dbj|BAF08625.1|/0/Os02g0327500 [Oryza sativa Japonica Group]
TCONS_00065705	up	2.64989	LOC_Os04g03920	up	2.64513	-	GO:0016021//integral component of membrane	-	-	gi|38346513|emb|CAE03808.2|/0/OSJNBa0027H09.8 [Oryza sativa Japonica Group]
TCONS_00081336	up	7.85557	LOC_Os04g03920	up	2.64513	-	GO:0016021//integral component of membrane	-	-	gi|38346513|emb|CAE03808.2|/0/OSJNBa0027H09.8 [Oryza sativa Japonica Group]
TCONS_00089479	up	3.07091	LOC_Os04g03920	up	2.64513	-	GO:0016021//integral component of membrane	-	-	gi|38346513|emb|CAE03808.2|/0/OSJNBa0027H09.8 [Oryza sativa Japonica Group]
TCONS_00089479	up	3.07091	LOC_Os01g56690	up	2.64155	-	-	-	-	gi|255673731|dbj|BAH91314.1|/4.20052e-118/Os01g0773800 [Oryza sativa Japonica Group]
TCONS_00065705	up	2.64989	LOC_Os01g56690	up	2.64155	-	-	-	-	gi|255673731|dbj|BAH91314.1|/4.20052e-118/Os01g0773800 [Oryza sativa Japonica Group]
TCONS_00081336	up	7.85557	LOC_Os12g23660	up	2.63574	-	-	-	GO:0044260;GO:0090304	gi|108862577|gb|ABA97931.2|/0/retrotransposon protein, putative, Ty3-gypsy subclass [Oryza sativa Japonica Group]
TCONS_00059316	up	2.2842	LOC_Os12g23660	up	2.63574	-	-	-	GO:0044260;GO:0090304	gi|108862577|gb|ABA97931.2|/0/retrotransposon protein, putative, Ty3-gypsy subclass [Oryza sativa Japonica Group]
TCONS_00070703	up	3.1046	LOC_Os12g02340	up	2.63334	-	GO:0016023//cytoplasmic, membrane-bounded vesicle;GO:0016021//integral component of membrane	GO:0008289//lipid binding	GO:0006869//lipid transport	gi|77553491|gb|ABA96287.1|;gi|937940686|dbj|BAT15598.1|/4.25145e-38;1.20356e-64/Nonspecific lipid-transfer protein 3 precursor, putative, expressed [Oryza sativa Japonica Group];Os12g0115500 [Oryza sativa Japonica Group]
TCONS_00009978	up	1.89024	LOC_Os04g22080	up	2.62066	-	GO:0005576//extracellular region;GO:0005618//cell wall	GO:0045735//nutrient reservoir activity;GO:0046564//oxalate decarboxylase activity;GO:0030145//manganese ion binding	GO:0033609//oxalate metabolic process	gi|38568035|emb|CAD40409.3|/0/OSJNBa0065J03.5 [Oryza sativa Japonica Group]
TCONS_00081336	up	7.85557	LOC_Os03g31200	up	2.61812	ko04978//Mineral absorption;ko00908//Zeatin biosynthesis;ko01100//Metabolic pathways;ko03008//Ribosome biogenesis in eukaryotes;ko01110//Biosynthesis of secondary metabolites;ko03018//RNA degradation	GO:0016021//integral component of membrane	GO:0003676//nucleic acid binding;GO:0008270//zinc ion binding	GO:0015074//DNA integration	gi|41469360|gb|AAS07202.1|/0/putative integrase [Oryza sativa Japonica Group]
TCONS_00008924	up	2.83107	LOC_Os01g42110	up	2.61423	-	GO:0005887//integral component of plasma membrane	GO:0051119//sugar transmembrane transporter activity	GO:0034219//carbohydrate transmembrane transport	gi|75157485|sp|Q8LR09.1|SWT6A_ORYSJ/1.85653e-167/RecName: Full=Bidirectional sugar transporter SWEET6a; Short=OsSWEET6a
TCONS_00091345	up	2.80973	LOC_Os01g42110	up	2.61423	-	GO:0005887//integral component of plasma membrane	GO:0051119//sugar transmembrane transporter activity	GO:0034219//carbohydrate transmembrane transport	gi|75157485|sp|Q8LR09.1|SWT6A_ORYSJ/1.85653e-167/RecName: Full=Bidirectional sugar transporter SWEET6a; Short=OsSWEET6a
TCONS_00005792	up	2.63888	LOC_Os01g42110	up	2.61423	-	GO:0005887//integral component of plasma membrane	GO:0051119//sugar transmembrane transporter activity	GO:0034219//carbohydrate transmembrane transport	gi|75157485|sp|Q8LR09.1|SWT6A_ORYSJ/1.85653e-167/RecName: Full=Bidirectional sugar transporter SWEET6a; Short=OsSWEET6a
TCONS_00010868	up	2.63376	LOC_Os01g42110	up	2.61423	-	GO:0005887//integral component of plasma membrane	GO:0051119//sugar transmembrane transporter activity	GO:0034219//carbohydrate transmembrane transport	gi|75157485|sp|Q8LR09.1|SWT6A_ORYSJ/1.85653e-167/RecName: Full=Bidirectional sugar transporter SWEET6a; Short=OsSWEET6a
TCONS_00056787	up	2.47695	LOC_Os01g42110	up	2.61423	-	GO:0005887//integral component of plasma membrane	GO:0051119//sugar transmembrane transporter activity	GO:0034219//carbohydrate transmembrane transport	gi|75157485|sp|Q8LR09.1|SWT6A_ORYSJ/1.85653e-167/RecName: Full=Bidirectional sugar transporter SWEET6a; Short=OsSWEET6a
TCONS_00059822	up	2.24492	LOC_Os01g42110	up	2.61423	-	GO:0005887//integral component of plasma membrane	GO:0051119//sugar transmembrane transporter activity	GO:0034219//carbohydrate transmembrane transport	gi|75157485|sp|Q8LR09.1|SWT6A_ORYSJ/1.85653e-167/RecName: Full=Bidirectional sugar transporter SWEET6a; Short=OsSWEET6a
TCONS_00089479	up	3.07091	LOC_Os06g18770	up	2.61154	-	-	GO:0004523//RNA-DNA hybrid ribonuclease activity;GO:0003964//RNA-directed DNA polymerase activity;GO:0003677//DNA binding;GO:0003723//RNA binding	GO:0090502//RNA phosphodiester bond hydrolysis, endonucleolytic;GO:0006278//RNA-dependent DNA biosynthetic process;GO:0015074//DNA integration;GO:0006310//DNA recombination	gi|110288686|gb|AAP52380.2|/4.48937e-160/retrotransposon protein, putative, Ty3-gypsy subclass [Oryza sativa Japonica Group]
TCONS_00081336	up	7.85557	LOC_Os06g18770	up	2.61154	-	-	GO:0004523//RNA-DNA hybrid ribonuclease activity;GO:0003964//RNA-directed DNA polymerase activity;GO:0003677//DNA binding;GO:0003723//RNA binding	GO:0090502//RNA phosphodiester bond hydrolysis, endonucleolytic;GO:0006278//RNA-dependent DNA biosynthetic process;GO:0015074//DNA integration;GO:0006310//DNA recombination	gi|110288686|gb|AAP52380.2|/4.48937e-160/retrotransposon protein, putative, Ty3-gypsy subclass [Oryza sativa Japonica Group]
TCONS_00065705	up	2.64989	LOC_Os06g18770	up	2.61154	-	-	GO:0004523//RNA-DNA hybrid ribonuclease activity;GO:0003964//RNA-directed DNA polymerase activity;GO:0003677//DNA binding;GO:0003723//RNA binding	GO:0090502//RNA phosphodiester bond hydrolysis, endonucleolytic;GO:0006278//RNA-dependent DNA biosynthetic process;GO:0015074//DNA integration;GO:0006310//DNA recombination	gi|110288686|gb|AAP52380.2|/4.48937e-160/retrotransposon protein, putative, Ty3-gypsy subclass [Oryza sativa Japonica Group]
TCONS_00009978	up	1.89024	LOC_Os08g02230	up	2.6057	-	GO:0016020//membrane	GO:0050660//flavin adenine dinucleotide binding;GO:0003885//D-arabinono-1,4-lactone oxidase activity	GO:0055114//oxidation-reduction process	gi|113622819|dbj|BAF22764.1|/0/Os08g0114300 [Oryza sativa Japonica Group]
TCONS_00081336	up	7.85557	LOC_Os03g55660	up	2.60058	ko03013//RNA transport	-	-	-	gi|108711249|gb|ABF99044.1|/0/nucleoporin, putative, expressed [Oryza sativa Japonica Group]
TCONS_00056787	up	2.47695	LOC_Os08g17870	up	2.59699	-	-	-	-	gi|222640261|gb|EEE68393.1|/0/hypothetical protein OsJ_26729 [Oryza sativa Japonica Group]
TCONS_00008924	up	2.83107	LOC_Os04g52550	up	2.5911	-	-	GO:0003676//nucleic acid binding	GO:0031047//gene silencing by RNA	gi|75144522|sp|Q7XTS3.2|AGO3_ORYSJ/0/RecName: Full=Protein argonaute 3; Short=OsAGO3
TCONS_00091345	up	2.80973	LOC_Os04g52550	up	2.5911	-	-	GO:0003676//nucleic acid binding	GO:0031047//gene silencing by RNA	gi|75144522|sp|Q7XTS3.2|AGO3_ORYSJ/0/RecName: Full=Protein argonaute 3; Short=OsAGO3
TCONS_00010868	up	2.63376	LOC_Os04g52550	up	2.5911	-	-	GO:0003676//nucleic acid binding	GO:0031047//gene silencing by RNA	gi|75144522|sp|Q7XTS3.2|AGO3_ORYSJ/0/RecName: Full=Protein argonaute 3; Short=OsAGO3
TCONS_00056787	up	2.47695	LOC_Os04g52550	up	2.5911	-	-	GO:0003676//nucleic acid binding	GO:0031047//gene silencing by RNA	gi|75144522|sp|Q7XTS3.2|AGO3_ORYSJ/0/RecName: Full=Protein argonaute 3; Short=OsAGO3
TCONS_00059822	up	2.24492	LOC_Os04g52550	up	2.5911	-	-	GO:0003676//nucleic acid binding	GO:0031047//gene silencing by RNA	gi|75144522|sp|Q7XTS3.2|AGO3_ORYSJ/0/RecName: Full=Protein argonaute 3; Short=OsAGO3
TCONS_00065705	up	2.64989	LOC_Os03g14050	up	2.58882	-	GO:0016023//cytoplasmic, membrane-bounded vesicle	-	-	gi|113548004|dbj|BAF11447.1|;gi|937908301|dbj|BAS83221.1|/8.97839e-163;3.55534e-143/Os03g0244200 [Oryza sativa Japonica Group];Os03g0244200, partial [Oryza sativa Japonica Group]
TCONS_00059316	up	2.2842	LOC_Os06g46920	up	2.58555	ko00941//Flavonoid biosynthesis;ko01100//Metabolic pathways;ko01110//Biosynthesis of secondary metabolites	-	GO:0050662//coenzyme binding;GO:0003824//catalytic activity	-	gi|113596426|dbj|BAF20300.1|/0/Os06g0683100 [Oryza sativa Japonica Group]
TCONS_00065705	up	2.64989	LOC_Os05g39720	up	2.58547	ko04626//Plant-pathogen interaction	GO:0009536//plastid	-	-	gi|46394394|tpg|DAA05135.1|/0/TPA_inf: WRKY transcription factor 70 [Oryza sativa (indica cultivar-group)] [Oryza sativa Indica Group]
TCONS_00089479	up	3.07091	LOC_Os05g39720	up	2.58547	ko04626//Plant-pathogen interaction	GO:0009536//plastid	-	-	gi|46394394|tpg|DAA05135.1|/0/TPA_inf: WRKY transcription factor 70 [Oryza sativa (indica cultivar-group)] [Oryza sativa Indica Group]
TCONS_00065705	up	2.64989	LOC_Os02g38000	up	2.58083	ko00900//Terpenoid backbone biosynthesis;ko00908//Zeatin biosynthesis;ko01100//Metabolic pathways;ko03008//Ribosome biogenesis in eukaryotes;ko01110//Biosynthesis of secondary metabolites;ko03018//RNA degradation	-	GO:0003677//DNA binding	GO:0006310//DNA recombination	gi|255674783|dbj|BAH92311.1|/0/Os03g0680566 [Oryza sativa Japonica Group]
TCONS_00089479	up	3.07091	LOC_Os02g38000	up	2.58083	ko00900//Terpenoid backbone biosynthesis;ko00908//Zeatin biosynthesis;ko01100//Metabolic pathways;ko03008//Ribosome biogenesis in eukaryotes;ko01110//Biosynthesis of secondary metabolites;ko03018//RNA degradation	-	GO:0003677//DNA binding	GO:0006310//DNA recombination	gi|255674783|dbj|BAH92311.1|/0/Os03g0680566 [Oryza sativa Japonica Group]
TCONS_00065705	up	2.64989	LOC_Os03g02140	up	2.57167	-	GO:0016023//cytoplasmic, membrane-bounded vesicle	GO:0008270//zinc ion binding;GO:0030598//rRNA N-glycosylase activity	GO:0006952//defense response;GO:0017148//negative regulation of translation	gi|108705814|gb|ABF93609.1|/0/transposon protein, putative, Mutator sub-class [Oryza sativa Japonica Group]
TCONS_00089479	up	3.07091	LOC_Os03g02140	up	2.57167	-	GO:0016023//cytoplasmic, membrane-bounded vesicle	GO:0008270//zinc ion binding;GO:0030598//rRNA N-glycosylase activity	GO:0006952//defense response;GO:0017148//negative regulation of translation	gi|108705814|gb|ABF93609.1|/0/transposon protein, putative, Mutator sub-class [Oryza sativa Japonica Group]
TCONS_00008924	up	2.83107	LOC_Os12g32610	up	2.56678	-	-	-	-	gi|255670343|dbj|BAH95705.1|/2.32296e-14/Os12g0510750 [Oryza sativa Japonica Group]
TCONS_00091345	up	2.80973	LOC_Os12g32610	up	2.56678	-	-	-	-	gi|255670343|dbj|BAH95705.1|/2.32296e-14/Os12g0510750 [Oryza sativa Japonica Group]
TCONS_00005781	up	3.08006	LOC_Os12g32610	up	2.56678	-	-	-	-	gi|255670343|dbj|BAH95705.1|/2.32296e-14/Os12g0510750 [Oryza sativa Japonica Group]
TCONS_00005792	up	2.63888	LOC_Os12g32610	up	2.56678	-	-	-	-	gi|255670343|dbj|BAH95705.1|/2.32296e-14/Os12g0510750 [Oryza sativa Japonica Group]
TCONS_00010868	up	2.63376	LOC_Os12g32610	up	2.56678	-	-	-	-	gi|255670343|dbj|BAH95705.1|/2.32296e-14/Os12g0510750 [Oryza sativa Japonica Group]
TCONS_00056787	up	2.47695	LOC_Os12g32610	up	2.56678	-	-	-	-	gi|255670343|dbj|BAH95705.1|/2.32296e-14/Os12g0510750 [Oryza sativa Japonica Group]
TCONS_00059822	up	2.24492	LOC_Os12g32610	up	2.56678	-	-	-	-	gi|255670343|dbj|BAH95705.1|/2.32296e-14/Os12g0510750 [Oryza sativa Japonica Group]
TCONS_00081336	up	7.85557	LOC_Os03g18490	up	2.55127	-	-	-	-	gi|108707645|gb|ABF95440.1|/3.21189e-105/expressed protein [Oryza sativa Japonica Group]
TCONS_00065705	up	2.64989	LOC_Os07g31390	up	2.54959	-	GO:0005576//extracellular region;GO:0016023//cytoplasmic, membrane-bounded vesicle	-	-	gi|115502172|sp|Q850K7.2|EXLB1_ORYSJ/0/RecName: Full=Expansin-like B1; AltName: Full=Expansin-related 1; AltName: Full=OsEXLB1; AltName: Full=OsEXPR1; AltName: Full=OsaEXPb3.1; Flags: Precursor
TCONS_00089479	up	3.07091	LOC_Os07g31390	up	2.54959	-	GO:0005576//extracellular region;GO:0016023//cytoplasmic, membrane-bounded vesicle	-	-	gi|115502172|sp|Q850K7.2|EXLB1_ORYSJ/0/RecName: Full=Expansin-like B1; AltName: Full=Expansin-related 1; AltName: Full=OsEXLB1; AltName: Full=OsEXPR1; AltName: Full=OsaEXPb3.1; Flags: Precursor
TCONS_00065705	up	2.64989	LOC_Os02g02970	up	2.54212	ko03018//RNA degradation	-	GO:0016740//transferase activity	-	gi|255670556|dbj|BAH91508.1|/0/Os02g0122100 [Oryza sativa Japonica Group]
TCONS_00089479	up	3.07091	LOC_Os02g02970	up	2.54212	ko03018//RNA degradation	-	GO:0016740//transferase activity	-	gi|255670556|dbj|BAH91508.1|/0/Os02g0122100 [Oryza sativa Japonica Group]
TCONS_00065705	up	2.64989	LOC_Os06g37560	up	2.53976	ko00531//Glycosaminoglycan degradation;ko00052//Galactose metabolism;ko00400//Phenylalanine, tyrosine and tryptophan biosynthesis;ko00051//Fructose and mannose metabolism;ko04142//Lysosome;ko00520//Amino sugar and nucleotide sugar metabolism;ko00604//Glycosphingolipid biosynthesis - ganglio series;ko01100//Metabolic pathways;ko00600//Sphingolipid metabolism;ko03010//Ribosome;ko01110//Biosynthesis…	GO:0016023//cytoplasmic, membrane-bounded vesicle;GO:0005773//vacuole;GO:0048046//apoplast;GO:0005618//cell wall	GO:0004565//beta-galactosidase activity	GO:0005975//carbohydrate metabolic process	gi|75112285|sp|Q5Z7L0.1|BGAL9_ORYSJ/0/RecName: Full=Beta-galactosidase 9; Short=Lactase 9; Flags: Precursor
TCONS_00009978	up	1.89024	LOC_Os06g37560	up	2.53976	ko00531//Glycosaminoglycan degradation;ko00052//Galactose metabolism;ko00400//Phenylalanine, tyrosine and tryptophan biosynthesis;ko00051//Fructose and mannose metabolism;ko04142//Lysosome;ko00520//Amino sugar and nucleotide sugar metabolism;ko00604//Glycosphingolipid biosynthesis - ganglio series;ko01100//Metabolic pathways;ko00600//Sphingolipid metabolism;ko03010//Ribosome;ko01110//Biosynthesis…	GO:0016023//cytoplasmic, membrane-bounded vesicle;GO:0005773//vacuole;GO:0048046//apoplast;GO:0005618//cell wall	GO:0004565//beta-galactosidase activity	GO:0005975//carbohydrate metabolic process	gi|75112285|sp|Q5Z7L0.1|BGAL9_ORYSJ/0/RecName: Full=Beta-galactosidase 9; Short=Lactase 9; Flags: Precursor
TCONS_00089479	up	3.07091	LOC_Os06g37560	up	2.53976	ko00531//Glycosaminoglycan degradation;ko00052//Galactose metabolism;ko00400//Phenylalanine, tyrosine and tryptophan biosynthesis;ko00051//Fructose and mannose metabolism;ko04142//Lysosome;ko00520//Amino sugar and nucleotide sugar metabolism;ko00604//Glycosphingolipid biosynthesis - ganglio series;ko01100//Metabolic pathways;ko00600//Sphingolipid metabolism;ko03010//Ribosome;ko01110//Biosynthesis…	GO:0016023//cytoplasmic, membrane-bounded vesicle;GO:0005773//vacuole;GO:0048046//apoplast;GO:0005618//cell wall	GO:0004565//beta-galactosidase activity	GO:0005975//carbohydrate metabolic process	gi|75112285|sp|Q5Z7L0.1|BGAL9_ORYSJ/0/RecName: Full=Beta-galactosidase 9; Short=Lactase 9; Flags: Precursor
TCONS_00056787	up	2.47695	LOC_Os03g48780	up	2.53557	-	GO:0005618//cell wall;GO:0048046//apoplast;GO:0016023//cytoplasmic, membrane-bounded vesicle	GO:0045735//nutrient reservoir activity;GO:0030145//manganese ion binding;GO:0046564//oxalate decarboxylase activity	GO:0033609//oxalate metabolic process	gi|75243632|sp|Q851K1.1|GL36_ORYSJ/1.83554e-150/RecName: Full=Germin-like protein 3-6; Flags: Precursor
TCONS_00059822	up	2.24492	LOC_Os03g48780	up	2.53557	-	GO:0005618//cell wall;GO:0048046//apoplast;GO:0016023//cytoplasmic, membrane-bounded vesicle	GO:0045735//nutrient reservoir activity;GO:0030145//manganese ion binding;GO:0046564//oxalate decarboxylase activity	GO:0033609//oxalate metabolic process	gi|75243632|sp|Q851K1.1|GL36_ORYSJ/1.83554e-150/RecName: Full=Germin-like protein 3-6; Flags: Precursor
TCONS_00070703	up	3.1046	LOC_Os01g12660	up	2.53391	-	GO:0016021//integral component of membrane;GO:0005634//nucleus	GO:0005524//ATP binding;GO:0008568//microtubule-severing ATPase activity	GO:0031122//cytoplasmic microtubule organization	gi|113531995|dbj|BAF04378.1|/0/Os01g0226400 [Oryza sativa Japonica Group]
TCONS_00056787	up	2.47695	LOC_Os10g34930	up	2.53014	-	GO:0016023//cytoplasmic, membrane-bounded vesicle	-	-	gi|113639535|dbj|BAF26840.1|/2.14344e-131/Os10g0491000 [Oryza sativa Japonica Group]
TCONS_00081336	up	7.85557	LOC_Os11g45690	up	2.52771	ko03440//Homologous recombination;ko00240//Pyrimidine metabolism;ko01100//Metabolic pathways;ko03460//Fanconi anemia pathway;ko02020//Two-component system;ko02010//ABC transporters;ko00670//One carbon pool by folate	-	GO:0004523//RNA-DNA hybrid ribonuclease activity;GO:0003676//nucleic acid binding	GO:0090502//RNA phosphodiester bond hydrolysis, endonucleolytic;GO:0015074//DNA integration	gi|77552494|gb|ABA95291.1|/0/transposon protein, putative, unclassified [Oryza sativa Japonica Group]
TCONS_00065705	up	2.64989	LOC_Os08g30020	up	2.51976	-	GO:0016020//membrane;GO:0016023//cytoplasmic, membrane-bounded vesicle;GO:0016021//integral component of membrane	-	-	gi|40253412|dbj|BAD05341.1|;gi|215694369|dbj|BAG89362.1|;gi|937930364|dbj|BAT05280.1|/0;0;9.3634e-38/membrane protein-like [Oryza sativa Japonica Group];unnamed protein product [Oryza sativa Japonica Group];Os08g0389700 [Oryza sativa Japonica Group]
TCONS_00089479	up	3.07091	LOC_Os08g30020	up	2.51976	-	GO:0016020//membrane;GO:0016023//cytoplasmic, membrane-bounded vesicle;GO:0016021//integral component of membrane	-	-	gi|40253412|dbj|BAD05341.1|;gi|215694369|dbj|BAG89362.1|;gi|937930364|dbj|BAT05280.1|/0;0;9.3634e-38/membrane protein-like [Oryza sativa Japonica Group];unnamed protein product [Oryza sativa Japonica Group];Os08g0389700 [Oryza sativa Japonica Group]
TCONS_00089479	up	3.07091	LOC_Os02g26720	up	2.50889	ko00562//Inositol phosphate metabolism;ko01100//Metabolic pathways;ko04070//Phosphatidylinositol signaling system	GO:0005622//intracellular	GO:0052726//inositol-1,3,4-trisphosphate 5-kinase activity;GO:0047325//inositol tetrakisphosphate 1-kinase activity;GO:0005524//ATP binding;GO:0000287//magnesium ion binding;GO:0052725//inositol-1,3,4-trisphosphate 6-kinase activity	GO:0010264//myo-inositol hexakisphosphate biosynthetic process;GO:0016310//phosphorylation;GO:0032957//inositol trisphosphate metabolic process	gi|113536343|dbj|BAF08726.1|/0/Os02g0466400, partial [Oryza sativa Japonica Group]
TCONS_00008924	up	2.83107	LOC_Os01g63060	up	2.50415	-	GO:0005794//Golgi apparatus;GO:0016021//integral component of membrane	GO:0016740//transferase activity	GO:0006952//defense response;GO:0006665//sphingolipid metabolic process	gi|75103416|sp|Q5N7A7.1|IPCS_ORYSJ/0/RecName: Full=Phosphatidylinositol:ceramide inositolphosphotransferase; AltName: Full=Inositol-phosphorylceramide synthase; Short=IPC synthase; AltName: Full=Protein ENHANCING RPW8-MEDIATED HR-LIKE CELL DEATH 1; AltName: Full=Sphingolipid synthase
TCONS_00091345	up	2.80973	LOC_Os01g63060	up	2.50415	-	GO:0005794//Golgi apparatus;GO:0016021//integral component of membrane	GO:0016740//transferase activity	GO:0006952//defense response;GO:0006665//sphingolipid metabolic process	gi|75103416|sp|Q5N7A7.1|IPCS_ORYSJ/0/RecName: Full=Phosphatidylinositol:ceramide inositolphosphotransferase; AltName: Full=Inositol-phosphorylceramide synthase; Short=IPC synthase; AltName: Full=Protein ENHANCING RPW8-MEDIATED HR-LIKE CELL DEATH 1; AltName: Full=Sphingolipid synthase
TCONS_00010868	up	2.63376	LOC_Os01g63060	up	2.50415	-	GO:0005794//Golgi apparatus;GO:0016021//integral component of membrane	GO:0016740//transferase activity	GO:0006952//defense response;GO:0006665//sphingolipid metabolic process	gi|75103416|sp|Q5N7A7.1|IPCS_ORYSJ/0/RecName: Full=Phosphatidylinositol:ceramide inositolphosphotransferase; AltName: Full=Inositol-phosphorylceramide synthase; Short=IPC synthase; AltName: Full=Protein ENHANCING RPW8-MEDIATED HR-LIKE CELL DEATH 1; AltName: Full=Sphingolipid synthase
TCONS_00056787	up	2.47695	LOC_Os01g63060	up	2.50415	-	GO:0005794//Golgi apparatus;GO:0016021//integral component of membrane	GO:0016740//transferase activity	GO:0006952//defense response;GO:0006665//sphingolipid metabolic process	gi|75103416|sp|Q5N7A7.1|IPCS_ORYSJ/0/RecName: Full=Phosphatidylinositol:ceramide inositolphosphotransferase; AltName: Full=Inositol-phosphorylceramide synthase; Short=IPC synthase; AltName: Full=Protein ENHANCING RPW8-MEDIATED HR-LIKE CELL DEATH 1; AltName: Full=Sphingolipid synthase
TCONS_00059822	up	2.24492	LOC_Os01g63060	up	2.50415	-	GO:0005794//Golgi apparatus;GO:0016021//integral component of membrane	GO:0016740//transferase activity	GO:0006952//defense response;GO:0006665//sphingolipid metabolic process	gi|75103416|sp|Q5N7A7.1|IPCS_ORYSJ/0/RecName: Full=Phosphatidylinositol:ceramide inositolphosphotransferase; AltName: Full=Inositol-phosphorylceramide synthase; Short=IPC synthase; AltName: Full=Protein ENHANCING RPW8-MEDIATED HR-LIKE CELL DEATH 1; AltName: Full=Sphingolipid synthase
TCONS_00070703	up	3.1046	LOC_Os12g39110	up	2.50016	ko04120//Ubiquitin mediated proteolysis;ko04141//Protein processing in endoplasmic reticulum;ko01100//Metabolic pathways;ko00563//Glycosylphosphatidylinositol(GPI)-anchor biosynthesis	-	GO:0008270//zinc ion binding	-	gi|108862882|gb|ABA99126.2|/2.17626e-157/Zinc finger, C3HC4 type family protein, expressed [Oryza sativa Japonica Group]
TCONS_00065705	up	2.64989	LOC_Os08g11310	up	2.49723	-	GO:0005739//mitochondrion;GO:0005634//nucleus	GO:0008234//cysteine-type peptidase activity;GO:0003677//DNA binding;GO:0046983//protein dimerization activity	GO:0006355//regulation of transcription, DNA-templated;GO:0006508//proteolysis	gi|62733149|gb|AAX95266.1|/0/transposon protein, putative, CACTA, En/Spm sub-class [Oryza sativa Japonica Group]
TCONS_00089479	up	3.07091	LOC_Os08g11310	up	2.49723	-	GO:0005739//mitochondrion;GO:0005634//nucleus	GO:0008234//cysteine-type peptidase activity;GO:0003677//DNA binding;GO:0046983//protein dimerization activity	GO:0006355//regulation of transcription, DNA-templated;GO:0006508//proteolysis	gi|62733149|gb|AAX95266.1|/0/transposon protein, putative, CACTA, En/Spm sub-class [Oryza sativa Japonica Group]
TCONS_00008924	up	2.83107	LOC_Os07g07990	up	2.49311	ko04626//Plant-pathogen interaction	GO:0016023//cytoplasmic, membrane-bounded vesicle	GO:0016301//kinase activity	GO:0016310//phosphorylation	gi|1002284784|ref|XP_015646691.1|/0/PREDICTED: leucine-rich repeat extensin-like protein 6 [Oryza sativa Japonica Group]
TCONS_00091345	up	2.80973	LOC_Os07g07990	up	2.49311	ko04626//Plant-pathogen interaction	GO:0016023//cytoplasmic, membrane-bounded vesicle	GO:0016301//kinase activity	GO:0016310//phosphorylation	gi|1002284784|ref|XP_015646691.1|/0/PREDICTED: leucine-rich repeat extensin-like protein 6 [Oryza sativa Japonica Group]
TCONS_00059822	up	2.24492	LOC_Os07g07990	up	2.49311	ko04626//Plant-pathogen interaction	GO:0016023//cytoplasmic, membrane-bounded vesicle	GO:0016301//kinase activity	GO:0016310//phosphorylation	gi|1002284784|ref|XP_015646691.1|/0/PREDICTED: leucine-rich repeat extensin-like protein 6 [Oryza sativa Japonica Group]
TCONS_00059318	up	1.9494	LOC_Os07g07990	up	2.49311	ko04626//Plant-pathogen interaction	GO:0016023//cytoplasmic, membrane-bounded vesicle	GO:0016301//kinase activity	GO:0016310//phosphorylation	gi|1002284784|ref|XP_015646691.1|/0/PREDICTED: leucine-rich repeat extensin-like protein 6 [Oryza sativa Japonica Group]
TCONS_00005792	up	2.63888	LOC_Os07g07990	up	2.49311	ko04626//Plant-pathogen interaction	GO:0016023//cytoplasmic, membrane-bounded vesicle	GO:0016301//kinase activity	GO:0016310//phosphorylation	gi|1002284784|ref|XP_015646691.1|/0/PREDICTED: leucine-rich repeat extensin-like protein 6 [Oryza sativa Japonica Group]
TCONS_00010868	up	2.63376	LOC_Os07g07990	up	2.49311	ko04626//Plant-pathogen interaction	GO:0016023//cytoplasmic, membrane-bounded vesicle	GO:0016301//kinase activity	GO:0016310//phosphorylation	gi|1002284784|ref|XP_015646691.1|/0/PREDICTED: leucine-rich repeat extensin-like protein 6 [Oryza sativa Japonica Group]
TCONS_00056787	up	2.47695	LOC_Os07g07990	up	2.49311	ko04626//Plant-pathogen interaction	GO:0016023//cytoplasmic, membrane-bounded vesicle	GO:0016301//kinase activity	GO:0016310//phosphorylation	gi|1002284784|ref|XP_015646691.1|/0/PREDICTED: leucine-rich repeat extensin-like protein 6 [Oryza sativa Japonica Group]
TCONS_00059316	up	2.2842	LOC_Os07g07990	up	2.49311	ko04626//Plant-pathogen interaction	GO:0016023//cytoplasmic, membrane-bounded vesicle	GO:0016301//kinase activity	GO:0016310//phosphorylation	gi|1002284784|ref|XP_015646691.1|/0/PREDICTED: leucine-rich repeat extensin-like protein 6 [Oryza sativa Japonica Group]
TCONS_00065705	up	2.64989	LOC_Os02g20100	up	2.48852	ko03440//Homologous recombination;ko00240//Pyrimidine metabolism;ko01100//Metabolic pathways;ko03460//Fanconi anemia pathway;ko02020//Two-component system;ko02010//ABC transporters;ko00670//One carbon pool by folate	-	GO:0004523//RNA-DNA hybrid ribonuclease activity;GO:0003676//nucleic acid binding	GO:0090502//RNA phosphodiester bond hydrolysis, endonucleolytic;GO:0015074//DNA integration	gi|77552546|gb|ABA95343.1|/0/retrotransposon protein, putative, Ty3-gypsy subclass [Oryza sativa Japonica Group]
TCONS_00081336	up	7.85557	LOC_Os02g20100	up	2.48852	ko03440//Homologous recombination;ko00240//Pyrimidine metabolism;ko01100//Metabolic pathways;ko03460//Fanconi anemia pathway;ko02020//Two-component system;ko02010//ABC transporters;ko00670//One carbon pool by folate	-	GO:0004523//RNA-DNA hybrid ribonuclease activity;GO:0003676//nucleic acid binding	GO:0090502//RNA phosphodiester bond hydrolysis, endonucleolytic;GO:0015074//DNA integration	gi|77552546|gb|ABA95343.1|/0/retrotransposon protein, putative, Ty3-gypsy subclass [Oryza sativa Japonica Group]
TCONS_00089479	up	3.07091	LOC_Os02g20100	up	2.48852	ko03440//Homologous recombination;ko00240//Pyrimidine metabolism;ko01100//Metabolic pathways;ko03460//Fanconi anemia pathway;ko02020//Two-component system;ko02010//ABC transporters;ko00670//One carbon pool by folate	-	GO:0004523//RNA-DNA hybrid ribonuclease activity;GO:0003676//nucleic acid binding	GO:0090502//RNA phosphodiester bond hydrolysis, endonucleolytic;GO:0015074//DNA integration	gi|77552546|gb|ABA95343.1|/0/retrotransposon protein, putative, Ty3-gypsy subclass [Oryza sativa Japonica Group]
TCONS_00008924	up	2.83107	LOC_Os06g45184	up	2.48384	-	-	-	-	gi|255675268|dbj|BAH92554.1|/1.9679e-22/Os04g0274700 [Oryza sativa Japonica Group]
TCONS_00091345	up	2.80973	LOC_Os06g45184	up	2.48384	-	-	-	-	gi|255675268|dbj|BAH92554.1|/1.9679e-22/Os04g0274700 [Oryza sativa Japonica Group]
TCONS_00005781	up	3.08006	LOC_Os06g45184	up	2.48384	-	-	-	-	gi|255675268|dbj|BAH92554.1|/1.9679e-22/Os04g0274700 [Oryza sativa Japonica Group]
TCONS_00005792	up	2.63888	LOC_Os06g45184	up	2.48384	-	-	-	-	gi|255675268|dbj|BAH92554.1|/1.9679e-22/Os04g0274700 [Oryza sativa Japonica Group]
TCONS_00010868	up	2.63376	LOC_Os06g45184	up	2.48384	-	-	-	-	gi|255675268|dbj|BAH92554.1|/1.9679e-22/Os04g0274700 [Oryza sativa Japonica Group]
TCONS_00059822	up	2.24492	LOC_Os06g45184	up	2.48384	-	-	-	-	gi|255675268|dbj|BAH92554.1|/1.9679e-22/Os04g0274700 [Oryza sativa Japonica Group]
TCONS_00009978	up	1.89024	LOC_Os11g29290	up	2.47245	ko00624//Polycyclic aromatic hydrocarbon degradation;ko00903//Limonene and pinene degradation;ko00073//Cutin, suberine and wax biosynthesis;ko01120//Microbial metabolism in diverse environments;ko01100//Metabolic pathways;ko00627//Aminobenzoate degradation;ko00945//Stilbenoid, diarylheptanoid and gingerol biosynthesis;ko00363//Bisphenol degradation;ko01110//Biosynthesis of secondary metabolites	GO:0016020//membrane;GO:0016023//cytoplasmic, membrane-bounded vesicle	GO:0046872//metal ion binding;GO:0016491//oxidoreductase activity	-	gi|108864395|gb|ABA93683.2|/0/Cytochrome P450 family protein, expressed [Oryza sativa Japonica Group]
TCONS_00081336	up	7.85557	LOC_Os08g08350	up	2.4719	ko04978//Mineral absorption;ko05166//HTLV-I infection;ko04115//p53 signaling pathway;ko00900//Terpenoid backbone biosynthesis;ko04110//Cell cycle;ko00908//Zeatin biosynthesis;ko05202//Transcriptional misregulation in cancer;ko01100//Metabolic pathways;ko03008//Ribosome biogenesis in eukaryotes;ko04064//NF-kappa B signaling pathway;ko01110//Biosynthesis of secondary metabolites;ko04210//Apoptosis;…	-	GO:0003676//nucleic acid binding	GO:0015074//DNA integration	gi|77550728|gb|ABA93525.1|/0/retrotransposon protein, putative, Ty1-copia subclass [Oryza sativa Japonica Group]
TCONS_00065705	up	2.64989	LOC_Os05g13920	up	2.4663	ko03460//Fanconi anemia pathway	-	GO:0004523//RNA-DNA hybrid ribonuclease activity;GO:0003676//nucleic acid binding	GO:0090502//RNA phosphodiester bond hydrolysis, endonucleolytic;GO:0015074//DNA integration	gi|13486715|dbj|BAB39950.1|/0/putative polyprotein [Oryza sativa Japonica Group]
TCONS_00089479	up	3.07091	LOC_Os05g13920	up	2.4663	ko03460//Fanconi anemia pathway	-	GO:0004523//RNA-DNA hybrid ribonuclease activity;GO:0003676//nucleic acid binding	GO:0090502//RNA phosphodiester bond hydrolysis, endonucleolytic;GO:0015074//DNA integration	gi|13486715|dbj|BAB39950.1|/0/putative polyprotein [Oryza sativa Japonica Group]
TCONS_00056787	up	2.47695	LOC_Os01g43460	up	2.46164	-	GO:0005623//cell;GO:0016021//integral component of membrane	GO:0008308//voltage-gated anion channel activity	GO:1903959//regulation of anion transmembrane transport;GO:0006873//cellular ion homeostasis	gi|1002235199|ref|XP_015621820.1|/0/PREDICTED: S-type anion channel SLAH2 isoform X1 [Oryza sativa Japonica Group]
TCONS_00009978	up	1.89024	LOC_Os05g50990	up	2.46104	ko05020//Prion diseases	-	-	-	gi|48475090|gb|AAT44159.1|/0/unknow protein, contains tetratricopeptide (TPR) domain [Oryza sativa Japonica Group]
TCONS_00009514	up	7.62476	LOC_Os03g16920	up	2.45744	ko03040//Spliceosome;ko05145//Toxoplasmosis;ko05134//Legionellosis;ko05162//Measles;ko05169//Epstein-Barr virus infection;ko04144//Endocytosis;ko04141//Protein processing in endoplasmic reticulum;ko05164//Influenza A;ko04010//MAPK signaling pathway;ko05020//Prion diseases;ko04612//Antigen processing and presentation	-	GO:0005524//ATP binding	-	gi|937908605|dbj|BAS83525.1|/0/Os03g0277300 [Oryza sativa Japonica Group]
TCONS_00008316	up	6.93456	LOC_Os03g16920	up	2.45744	ko03040//Spliceosome;ko05145//Toxoplasmosis;ko05134//Legionellosis;ko05162//Measles;ko05169//Epstein-Barr virus infection;ko04144//Endocytosis;ko04141//Protein processing in endoplasmic reticulum;ko05164//Influenza A;ko04010//MAPK signaling pathway;ko05020//Prion diseases;ko04612//Antigen processing and presentation	-	GO:0005524//ATP binding	-	gi|937908605|dbj|BAS83525.1|/0/Os03g0277300 [Oryza sativa Japonica Group]
TCONS_00059822	up	2.24492	LOC_Os03g16920	up	2.45744	ko03040//Spliceosome;ko05145//Toxoplasmosis;ko05134//Legionellosis;ko05162//Measles;ko05169//Epstein-Barr virus infection;ko04144//Endocytosis;ko04141//Protein processing in endoplasmic reticulum;ko05164//Influenza A;ko04010//MAPK signaling pathway;ko05020//Prion diseases;ko04612//Antigen processing and presentation	-	GO:0005524//ATP binding	-	gi|937908605|dbj|BAS83525.1|/0/Os03g0277300 [Oryza sativa Japonica Group]
TCONS_00065705	up	2.64989	LOC_Os08g43120	up	2.45049	ko03040//Spliceosome;ko04976//Bile secretion;ko02010//ABC transporters	GO:0016021//integral component of membrane	GO:0016887//ATPase activity;GO:0005524//ATP binding	GO:0006810//transport	gi|218201551|gb|EEC83978.1|/0/hypothetical protein OsI_30122 [Oryza sativa Indica Group]
TCONS_00089479	up	3.07091	LOC_Os08g43120	up	2.45049	ko03040//Spliceosome;ko04976//Bile secretion;ko02010//ABC transporters	GO:0016021//integral component of membrane	GO:0016887//ATPase activity;GO:0005524//ATP binding	GO:0006810//transport	gi|218201551|gb|EEC83978.1|/0/hypothetical protein OsI_30122 [Oryza sativa Indica Group]
TCONS_00009978	up	1.89024	LOC_Os02g46460	up	2.44737	-	GO:0016021//integral component of membrane	GO:0005215//transporter activity	GO:0006810//transport	gi|113537318|dbj|BAF09701.1|/0/Os02g0689900 [Oryza sativa Japonica Group]
TCONS_00065705	up	2.64989	LOC_Os03g61150	up	2.44359	-	-	-	-	gi|108711857|gb|ABF99652.1|;gi|108711859|gb|ABF99654.1|;gi|108711858|gb|ABF99653.1|/3.1538e-88;1.01832e-65;1.01763e-61/expressed protein [Oryza sativa Japonica Group];expressed protein [Oryza sativa Japonica Group];expressed protein [Oryza sativa Japonica Group]
TCONS_00081336	up	7.85557	LOC_Os03g61150	up	2.44359	-	-	-	-	gi|108711857|gb|ABF99652.1|;gi|108711859|gb|ABF99654.1|;gi|108711858|gb|ABF99653.1|/3.1538e-88;1.01832e-65;1.01763e-61/expressed protein [Oryza sativa Japonica Group];expressed protein [Oryza sativa Japonica Group];expressed protein [Oryza sativa Japonica Group]
TCONS_00089479	up	3.07091	LOC_Os03g61150	up	2.44359	-	-	-	-	gi|108711857|gb|ABF99652.1|;gi|108711859|gb|ABF99654.1|;gi|108711858|gb|ABF99653.1|/3.1538e-88;1.01832e-65;1.01763e-61/expressed protein [Oryza sativa Japonica Group];expressed protein [Oryza sativa Japonica Group];expressed protein [Oryza sativa Japonica Group]
TCONS_00009978	up	1.89024	LOC_Os04g10160	up	2.43309	ko00943//Isoflavonoid biosynthesis;ko00624//Polycyclic aromatic hydrocarbon degradation;ko00903//Limonene and pinene degradation;ko00940//Phenylpropanoid biosynthesis;ko00904//Diterpenoid biosynthesis;ko01120//Microbial metabolism in diverse environments;ko01100//Metabolic pathways;ko00627//Aminobenzoate degradation;ko00945//Stilbenoid, diarylheptanoid and gingerol biosynthesis;ko00363//Bisphenol…	GO:0016021//integral component of membrane	GO:0020037//heme binding;GO:0036209;GO:0005506//iron ion binding	GO:0006952//defense response;GO:0055114//oxidation-reduction process;GO:0051502;GO:0071395//cellular response to jasmonic acid stimulus	gi|205688119|sp|Q7X7X4.2|C99A2_ORYSJ/0/RecName: Full=Cytochrome P450 99A2
TCONS_00056787	up	2.47695	LOC_Os04g12540	up	2.42972	-	GO:0016021//integral component of membrane;GO:0016023//cytoplasmic, membrane-bounded vesicle;GO:0005886//plasma membrane	GO:0004674//protein serine/threonine kinase activity;GO:0005524//ATP binding;GO:0030246//carbohydrate binding	GO:0006952//defense response;GO:0006468//protein phosphorylation	gi|530656694|gb|AGT37611.1|/0/G-type lectin receptor kinase [Oryza sativa Indica Group]
TCONS_00059822	up	2.24492	LOC_Os04g12540	up	2.42972	-	GO:0016021//integral component of membrane;GO:0016023//cytoplasmic, membrane-bounded vesicle;GO:0005886//plasma membrane	GO:0004674//protein serine/threonine kinase activity;GO:0005524//ATP binding;GO:0030246//carbohydrate binding	GO:0006952//defense response;GO:0006468//protein phosphorylation	gi|530656694|gb|AGT37611.1|/0/G-type lectin receptor kinase [Oryza sativa Indica Group]
TCONS_00091345	up	2.80973	LOC_Os03g19290	up	2.4257	-	GO:0031305//integral component of mitochondrial inner membrane;GO:0005744//mitochondrial inner membrane presequence translocase complex	GO:0015266//protein channel activity	GO:0030150//protein import into mitochondrial matrix	gi|113548355|dbj|BAF11798.1|/1.85978e-63/Os03g0305600 [Oryza sativa Japonica Group]
TCONS_00056787	up	2.47695	LOC_Os03g19290	up	2.4257	-	GO:0031305//integral component of mitochondrial inner membrane;GO:0005744//mitochondrial inner membrane presequence translocase complex	GO:0015266//protein channel activity	GO:0030150//protein import into mitochondrial matrix	gi|113548355|dbj|BAF11798.1|/1.85978e-63/Os03g0305600 [Oryza sativa Japonica Group]
TCONS_00059822	up	2.24492	LOC_Os03g19290	up	2.4257	-	GO:0031305//integral component of mitochondrial inner membrane;GO:0005744//mitochondrial inner membrane presequence translocase complex	GO:0015266//protein channel activity	GO:0030150//protein import into mitochondrial matrix	gi|113548355|dbj|BAF11798.1|/1.85978e-63/Os03g0305600 [Oryza sativa Japonica Group]
TCONS_00065705	up	2.64989	LOC_Os01g69830	up	2.42521	-	-	-	-	gi|160185554|sp|Q0JGI1.2|SPL2_ORYSJ/0/RecName: Full=Squamosa promoter-binding-like protein 2
TCONS_00089479	up	3.07091	LOC_Os01g69830	up	2.42521	-	-	-	-	gi|160185554|sp|Q0JGI1.2|SPL2_ORYSJ/0/RecName: Full=Squamosa promoter-binding-like protein 2
TCONS_00009978	up	1.89024	LOC_Os08g33740	up	2.41087	-	GO:0016021//integral component of membrane	-	-	gi|75225129|sp|Q6YWK8.1|CSLAB_ORYSJ/0/RecName: Full=Probable mannan synthase 11; AltName: Full=Cellulose synthase-like protein A11; AltName: Full=OsCslA11
TCONS_00056787	up	2.47695	LOC_Os10g09240	up	2.39905	-	-	-	-	gi|31430451|gb|AAP52360.1|/5.57441e-36/expressed protein [Oryza sativa Japonica Group]
TCONS_00056787	up	2.47695	LOC_Os06g05320	up	2.39628	ko00330//Arginine and proline metabolism	-	GO:0016747//transferase activity, transferring acyl groups other than amino-acyl groups	-	gi|113594829|dbj|BAF18703.1|/0/Os06g0145600 [Oryza sativa Japonica Group]
TCONS_00081336	up	7.85557	LOC_Os01g16160	up	2.3935	ko05166//HTLV-I infection;ko04115//p53 signaling pathway;ko00900//Terpenoid backbone biosynthesis;ko04110//Cell cycle;ko00908//Zeatin biosynthesis;ko05202//Transcriptional misregulation in cancer;ko01100//Metabolic pathways;ko03008//Ribosome biogenesis in eukaryotes;ko04064//NF-kappa B signaling pathway;ko01110//Biosynthesis of secondary metabolites;ko04210//Apoptosis;ko03018//RNA degradation	-	GO:0003676//nucleic acid binding;GO:0008270//zinc ion binding	GO:0015074//DNA integration	gi|23928439|gb|AAN40025.1|/0/putative gag-pol polyprotein [Zea mays]
TCONS_00065705	up	2.64989	LOC_Os03g08940	up	2.37718	-	-	-	-	-
TCONS_00089479	up	3.07091	LOC_Os03g08940	up	2.37718	-	-	-	-	-
TCONS_00059316	up	2.2842	LOC_Os05g39250	up	2.3755	-	GO:0016021//integral component of membrane	-	-	gi|255676433|dbj|BAF17716.2|/5.30719e-119/Os05g0468800 [Oryza sativa Japonica Group]
TCONS_00009514	up	7.62476	LOC_Os03g25790	up	2.37331	ko04075//Plant hormone signal transduction	GO:0046658//anchored component of plasma membrane	GO:0004553//hydrolase activity, hydrolyzing O-glycosyl compounds;GO:0030247//polysaccharide binding	GO:0005975//carbohydrate metabolic process	gi|108708413|gb|ABF96208.1|/0/Glycosyl hydrolases family 17 protein, expressed [Oryza sativa Japonica Group]
TCONS_00008316	up	6.93456	LOC_Os03g25790	up	2.37331	ko04075//Plant hormone signal transduction	GO:0046658//anchored component of plasma membrane	GO:0004553//hydrolase activity, hydrolyzing O-glycosyl compounds;GO:0030247//polysaccharide binding	GO:0005975//carbohydrate metabolic process	gi|108708413|gb|ABF96208.1|/0/Glycosyl hydrolases family 17 protein, expressed [Oryza sativa Japonica Group]
TCONS_00059822	up	2.24492	LOC_Os03g25790	up	2.37331	ko04075//Plant hormone signal transduction	GO:0046658//anchored component of plasma membrane	GO:0004553//hydrolase activity, hydrolyzing O-glycosyl compounds;GO:0030247//polysaccharide binding	GO:0005975//carbohydrate metabolic process	gi|108708413|gb|ABF96208.1|/0/Glycosyl hydrolases family 17 protein, expressed [Oryza sativa Japonica Group]
TCONS_00065705	up	2.64989	LOC_Os04g41380	up	2.3587	ko00230//Purine metabolism;ko04623//Cytosolic DNA-sensing pathway;ko04626//Plant-pathogen interaction;ko05016//Huntington's disease;ko05169//Epstein-Barr virus infection;ko00240//Pyrimidine metabolism;ko01100//Metabolic pathways;ko03020//RNA polymerase	-	-	-	gi|32483317|emb|CAE02492.1|/0/OSJNBa0076N16.15 [Oryza sativa Japonica Group]
TCONS_00089479	up	3.07091	LOC_Os04g41380	up	2.3587	ko00230//Purine metabolism;ko04623//Cytosolic DNA-sensing pathway;ko04626//Plant-pathogen interaction;ko05016//Huntington's disease;ko05169//Epstein-Barr virus infection;ko00240//Pyrimidine metabolism;ko01100//Metabolic pathways;ko03020//RNA polymerase	-	-	-	gi|32483317|emb|CAE02492.1|/0/OSJNBa0076N16.15 [Oryza sativa Japonica Group]
TCONS_00065705	up	2.64989	LOC_Os01g03330	up	2.35863	-	GO:0005576//extracellular region;GO:0016023//cytoplasmic, membrane-bounded vesicle	GO:0004867//serine-type endopeptidase inhibitor activity	GO:0010951//negative regulation of endopeptidase activity	gi|113531418|dbj|BAF03801.1|/2.52634e-162/Os01g0124100 [Oryza sativa Japonica Group]
TCONS_00009514	up	7.62476	LOC_Os04g33200	up	2.35502	ko00531//Glycosaminoglycan degradation;ko04142//Lysosome;ko01100//Metabolic pathways	GO:0016021//integral component of membrane	-	-	gi|113564277|dbj|BAF14620.1|/0/Os04g0404900 [Oryza sativa Japonica Group]
TCONS_00008316	up	6.93456	LOC_Os04g33200	up	2.35502	ko00531//Glycosaminoglycan degradation;ko04142//Lysosome;ko01100//Metabolic pathways	GO:0016021//integral component of membrane	-	-	gi|113564277|dbj|BAF14620.1|/0/Os04g0404900 [Oryza sativa Japonica Group]
TCONS_00005781	up	3.08006	LOC_Os04g33200	up	2.35502	ko00531//Glycosaminoglycan degradation;ko04142//Lysosome;ko01100//Metabolic pathways	GO:0016021//integral component of membrane	-	-	gi|113564277|dbj|BAF14620.1|/0/Os04g0404900 [Oryza sativa Japonica Group]
TCONS_00056787	up	2.47695	LOC_Os08g02450	up	2.35193	-	GO:0012505//endomembrane system;GO:0016021//integral component of membrane	GO:0005451//monovalent cation:proton antiporter activity	GO:1902600//hydrogen ion transmembrane transport;GO:0006885//regulation of pH	gi|113622833|dbj|BAF22778.1|/0/Os08g0117800 [Oryza sativa Japonica Group]
TCONS_00056787	up	2.47695	LOC_Os03g49600	up	2.34314	ko00500//Starch and sucrose metabolism;ko00940//Phenylpropanoid biosynthesis;ko00460//Cyanoamino acid metabolism;ko01100//Metabolic pathways;ko01110//Biosynthesis of secondary metabolites	GO:0005576//extracellular region;GO:0016023//cytoplasmic, membrane-bounded vesicle	GO:0050224;GO:0047701;GO:0080079//cellobiose glucosidase activity;GO:0033907;GO:0047668//amygdalin beta-glucosidase activity;GO:0004567//beta-mannosidase activity;GO:0042973//glucan endo-1,3-beta-D-glucosidase activity;GO:0004565//beta-galactosidase activity;GO:0042803//protein homodimerization activity;GO:0080083//beta-gentiobiose beta-glucosidase activity;GO:0102483//scopolin beta-glucosidase a…	GO:0005975//carbohydrate metabolic process;GO:1901657//glycosyl compound metabolic process	gi|108710631|gb|ABF98426.1|;gi|108710630|gb|ABF98425.1|;gi|108710629|gb|ABF98424.1|;gi|75226342|sp|Q75I93.1|BGL07_ORYSJ/0;0;0;0/Glycosyl hydrolase family 1 protein, expressed [Oryza sativa Japonica Group];Glycosyl hydrolase family 1 protein, expressed [Oryza sativa Japonica Group];Glycosyl hydrolase family 1 protein, expressed [Oryza sativa Japonica Group];RecName: Full=Beta-glucosidase 7; Short=…
TCONS_00059822	up	2.24492	LOC_Os03g49600	up	2.34314	ko00500//Starch and sucrose metabolism;ko00940//Phenylpropanoid biosynthesis;ko00460//Cyanoamino acid metabolism;ko01100//Metabolic pathways;ko01110//Biosynthesis of secondary metabolites	GO:0005576//extracellular region;GO:0016023//cytoplasmic, membrane-bounded vesicle	GO:0050224;GO:0047701;GO:0080079//cellobiose glucosidase activity;GO:0033907;GO:0047668//amygdalin beta-glucosidase activity;GO:0004567//beta-mannosidase activity;GO:0042973//glucan endo-1,3-beta-D-glucosidase activity;GO:0004565//beta-galactosidase activity;GO:0042803//protein homodimerization activity;GO:0080083//beta-gentiobiose beta-glucosidase activity;GO:0102483//scopolin beta-glucosidase a…	GO:0005975//carbohydrate metabolic process;GO:1901657//glycosyl compound metabolic process	gi|108710631|gb|ABF98426.1|;gi|108710630|gb|ABF98425.1|;gi|108710629|gb|ABF98424.1|;gi|75226342|sp|Q75I93.1|BGL07_ORYSJ/0;0;0;0/Glycosyl hydrolase family 1 protein, expressed [Oryza sativa Japonica Group];Glycosyl hydrolase family 1 protein, expressed [Oryza sativa Japonica Group];Glycosyl hydrolase family 1 protein, expressed [Oryza sativa Japonica Group];RecName: Full=Beta-glucosidase 7; Short=…
TCONS_00065705	up	2.64989	LOC_Os03g08320	up	2.34133	ko04626//Plant-pathogen interaction;ko04075//Plant hormone signal transduction	GO:0005634//nucleus	GO:0003714//transcription corepressor activity	GO:1903507//negative regulation of nucleic acid-templated transcription;GO:2000022//regulation of jasmonic acid mediated signaling pathway;GO:0009611//response to wounding;GO:0031347//regulation of defense response;GO:0006351//transcription, DNA-templated	gi|75150198|sp|Q8GRS2.1|TI11C_ORYSJ/3.02982e-111/RecName: Full=Protein TIFY 11c; Short=OsTIFY11c; AltName: Full=Jasmonate ZIM domain-containing protein 11; Short=OsJAZ11; AltName: Full=OsJAZ2
TCONS_00089479	up	3.07091	LOC_Os03g08320	up	2.34133	ko04626//Plant-pathogen interaction;ko04075//Plant hormone signal transduction	GO:0005634//nucleus	GO:0003714//transcription corepressor activity	GO:1903507//negative regulation of nucleic acid-templated transcription;GO:2000022//regulation of jasmonic acid mediated signaling pathway;GO:0009611//response to wounding;GO:0031347//regulation of defense response;GO:0006351//transcription, DNA-templated	gi|75150198|sp|Q8GRS2.1|TI11C_ORYSJ/3.02982e-111/RecName: Full=Protein TIFY 11c; Short=OsTIFY11c; AltName: Full=Jasmonate ZIM domain-containing protein 11; Short=OsJAZ11; AltName: Full=OsJAZ2
TCONS_00070703	up	3.1046	LOC_Os07g04190	up	2.32701	ko00903//Limonene and pinene degradation;ko00642//Ethylbenzene degradation;ko00362//Benzoate degradation;ko00240//Pyrimidine metabolism;ko00051//Fructose and mannose metabolism;ko01120//Microbial metabolism in diverse environments;ko01100//Metabolic pathways;ko00627//Aminobenzoate degradation;ko00350//Tyrosine metabolism	GO:0016021//integral component of membrane;GO:0005886//plasma membrane	GO:0004672//protein kinase activity;GO:0033612//receptor serine/threonine kinase binding;GO:0043621//protein self-association;GO:0005524//ATP binding	GO:0048437//floral organ development;GO:0006468//protein phosphorylation;GO:0010075//regulation of meristem growth;GO:0048229//gametophyte development	gi|937925041|dbj|BAS99957.1|/0/Os07g0134200 [Oryza sativa Japonica Group]
TCONS_00008924	up	2.83107	LOC_Os08g27170	up	2.32357	ko04916//Melanogenesis;ko04020//Calcium signaling pathway;ko04270//Vascular smooth muscle contraction;ko05133//Pertussis;ko04744//Phototransduction;ko04626//Plant-pathogen interaction;ko04910//Insulin signaling pathway;ko04970//Salivary secretion;ko04912//GnRH signaling pathway;ko04722//Neurotrophin signaling pathway;ko05034//Alcoholism;ko05031//Amphetamine addiction;ko04745//Phototransduction - …	-	GO:0005516//calmodulin binding	GO:0006950//response to stress	gi|1002289249|ref|XP_015648922.1|/0/PREDICTED: protein SAR DEFICIENT 1-like [Oryza sativa Japonica Group]
TCONS_00091345	up	2.80973	LOC_Os08g27170	up	2.32357	ko04916//Melanogenesis;ko04020//Calcium signaling pathway;ko04270//Vascular smooth muscle contraction;ko05133//Pertussis;ko04744//Phototransduction;ko04626//Plant-pathogen interaction;ko04910//Insulin signaling pathway;ko04970//Salivary secretion;ko04912//GnRH signaling pathway;ko04722//Neurotrophin signaling pathway;ko05034//Alcoholism;ko05031//Amphetamine addiction;ko04745//Phototransduction - …	-	GO:0005516//calmodulin binding	GO:0006950//response to stress	gi|1002289249|ref|XP_015648922.1|/0/PREDICTED: protein SAR DEFICIENT 1-like [Oryza sativa Japonica Group]
TCONS_00008316	up	6.93456	LOC_Os08g27170	up	2.32357	ko04916//Melanogenesis;ko04020//Calcium signaling pathway;ko04270//Vascular smooth muscle contraction;ko05133//Pertussis;ko04744//Phototransduction;ko04626//Plant-pathogen interaction;ko04910//Insulin signaling pathway;ko04970//Salivary secretion;ko04912//GnRH signaling pathway;ko04722//Neurotrophin signaling pathway;ko05034//Alcoholism;ko05031//Amphetamine addiction;ko04745//Phototransduction - …	-	GO:0005516//calmodulin binding	GO:0006950//response to stress	gi|1002289249|ref|XP_015648922.1|/0/PREDICTED: protein SAR DEFICIENT 1-like [Oryza sativa Japonica Group]
TCONS_00056787	up	2.47695	LOC_Os08g27170	up	2.32357	ko04916//Melanogenesis;ko04020//Calcium signaling pathway;ko04270//Vascular smooth muscle contraction;ko05133//Pertussis;ko04744//Phototransduction;ko04626//Plant-pathogen interaction;ko04910//Insulin signaling pathway;ko04970//Salivary secretion;ko04912//GnRH signaling pathway;ko04722//Neurotrophin signaling pathway;ko05034//Alcoholism;ko05031//Amphetamine addiction;ko04745//Phototransduction - …	-	GO:0005516//calmodulin binding	GO:0006950//response to stress	gi|1002289249|ref|XP_015648922.1|/0/PREDICTED: protein SAR DEFICIENT 1-like [Oryza sativa Japonica Group]
TCONS_00059822	up	2.24492	LOC_Os08g27170	up	2.32357	ko04916//Melanogenesis;ko04020//Calcium signaling pathway;ko04270//Vascular smooth muscle contraction;ko05133//Pertussis;ko04744//Phototransduction;ko04626//Plant-pathogen interaction;ko04910//Insulin signaling pathway;ko04970//Salivary secretion;ko04912//GnRH signaling pathway;ko04722//Neurotrophin signaling pathway;ko05034//Alcoholism;ko05031//Amphetamine addiction;ko04745//Phototransduction - …	-	GO:0005516//calmodulin binding	GO:0006950//response to stress	gi|1002289249|ref|XP_015648922.1|/0/PREDICTED: protein SAR DEFICIENT 1-like [Oryza sativa Japonica Group]
TCONS_00059316	up	2.2842	LOC_Os11g34460	up	2.31886	ko04712//Circadian rhythm - plant	GO:0016021//integral component of membrane;GO:0005634//nucleus	GO:0009881//photoreceptor activity;GO:0001047//core promoter binding	GO:0016567//protein ubiquitination;GO:0007165//signal transduction;GO:0018298//protein-chromophore linkage;GO:0048511//rhythmic process;GO:0009911//positive regulation of flower development;GO:0006355//regulation of transcription, DNA-templated;GO:0007623//circadian rhythm;GO:0009637//response to blue light	gi|110832734|sp|Q2R2W1.2|ADO3_ORYSJ;gi|108864482|gb|ABG22521.1|/0;0/RecName: Full=Ada;Ada
TCONS_00008924	up	2.83107	LOC_Os06g08110	up	2.31694	-	GO:0016021//integral component of membrane;GO:0005739//mitochondrion	-	GO:0055085//transmembrane transport	gi|24413989|dbj|BAC22240.1|/0/nodulin-like protein [Oryza sativa Japonica Group]
TCONS_00091345	up	2.80973	LOC_Os06g08110	up	2.31694	-	GO:0016021//integral component of membrane;GO:0005739//mitochondrion	-	GO:0055085//transmembrane transport	gi|24413989|dbj|BAC22240.1|/0/nodulin-like protein [Oryza sativa Japonica Group]
TCONS_00005781	up	3.08006	LOC_Os06g08110	up	2.31694	-	GO:0016021//integral component of membrane;GO:0005739//mitochondrion	-	GO:0055085//transmembrane transport	gi|24413989|dbj|BAC22240.1|/0/nodulin-like protein [Oryza sativa Japonica Group]
TCONS_00005792	up	2.63888	LOC_Os06g08110	up	2.31694	-	GO:0016021//integral component of membrane;GO:0005739//mitochondrion	-	GO:0055085//transmembrane transport	gi|24413989|dbj|BAC22240.1|/0/nodulin-like protein [Oryza sativa Japonica Group]
TCONS_00010868	up	2.63376	LOC_Os06g08110	up	2.31694	-	GO:0016021//integral component of membrane;GO:0005739//mitochondrion	-	GO:0055085//transmembrane transport	gi|24413989|dbj|BAC22240.1|/0/nodulin-like protein [Oryza sativa Japonica Group]
TCONS_00056787	up	2.47695	LOC_Os06g08110	up	2.31694	-	GO:0016021//integral component of membrane;GO:0005739//mitochondrion	-	GO:0055085//transmembrane transport	gi|24413989|dbj|BAC22240.1|/0/nodulin-like protein [Oryza sativa Japonica Group]
TCONS_00059822	up	2.24492	LOC_Os06g08110	up	2.31694	-	GO:0016021//integral component of membrane;GO:0005739//mitochondrion	-	GO:0055085//transmembrane transport	gi|24413989|dbj|BAC22240.1|/0/nodulin-like protein [Oryza sativa Japonica Group]
TCONS_00065705	up	2.64989	LOC_Os05g15770	up	2.31453	ko00500//Starch and sucrose metabolism;ko00520//Amino sugar and nucleotide sugar metabolism;ko01100//Metabolic pathways;ko01110//Biosynthesis of secondary metabolites	GO:0005576//extracellular region;GO:0016023//cytoplasmic, membrane-bounded vesicle	GO:0004568//chitinase activity;GO:0008061//chitin binding	GO:0005975//carbohydrate metabolic process;GO:0006032//chitin catabolic process;GO:0006952//defense response	gi|255676171|dbj|BAF16931.2|/0/Os05g0247100 [Oryza sativa Japonica Group]
TCONS_00089479	up	3.07091	LOC_Os05g15770	up	2.31453	ko00500//Starch and sucrose metabolism;ko00520//Amino sugar and nucleotide sugar metabolism;ko01100//Metabolic pathways;ko01110//Biosynthesis of secondary metabolites	GO:0005576//extracellular region;GO:0016023//cytoplasmic, membrane-bounded vesicle	GO:0004568//chitinase activity;GO:0008061//chitin binding	GO:0005975//carbohydrate metabolic process;GO:0006032//chitin catabolic process;GO:0006952//defense response	gi|255676171|dbj|BAF16931.2|/0/Os05g0247100 [Oryza sativa Japonica Group]
TCONS_00011723	up	1.58332	LOC_Os10g06630	up	2.30234	-	GO:0016020//membrane	GO:0003755//peptidyl-prolyl cis-trans isomerase activity	GO:0006457//protein folding;GO:0000413//protein peptidyl-prolyl isomerization	gi|113638797|dbj|BAF26102.1|/2.59935e-119/Os10g0154700 [Oryza sativa Japonica Group]
TCONS_00091345	up	2.80973	LOC_Os03g18890	up	2.30028	ko00500//Starch and sucrose metabolism;ko00520//Amino sugar and nucleotide sugar metabolism;ko01110//Biosynthesis of secondary metabolites	GO:0005794//Golgi apparatus;GO:0016023//cytoplasmic, membrane-bounded vesicle	GO:0016757//transferase activity, transferring glycosyl groups	GO:0000271//polysaccharide biosynthetic process	gi|113548332|dbj|BAF11775.1|/0/Os03g0300900 [Oryza sativa Japonica Group]
TCONS_00005781	up	3.08006	LOC_Os03g18890	up	2.30028	ko00500//Starch and sucrose metabolism;ko00520//Amino sugar and nucleotide sugar metabolism;ko01110//Biosynthesis of secondary metabolites	GO:0005794//Golgi apparatus;GO:0016023//cytoplasmic, membrane-bounded vesicle	GO:0016757//transferase activity, transferring glycosyl groups	GO:0000271//polysaccharide biosynthetic process	gi|113548332|dbj|BAF11775.1|/0/Os03g0300900 [Oryza sativa Japonica Group]
TCONS_00010868	up	2.63376	LOC_Os03g18890	up	2.30028	ko00500//Starch and sucrose metabolism;ko00520//Amino sugar and nucleotide sugar metabolism;ko01110//Biosynthesis of secondary metabolites	GO:0005794//Golgi apparatus;GO:0016023//cytoplasmic, membrane-bounded vesicle	GO:0016757//transferase activity, transferring glycosyl groups	GO:0000271//polysaccharide biosynthetic process	gi|113548332|dbj|BAF11775.1|/0/Os03g0300900 [Oryza sativa Japonica Group]
TCONS_00059822	up	2.24492	LOC_Os03g18890	up	2.30028	ko00500//Starch and sucrose metabolism;ko00520//Amino sugar and nucleotide sugar metabolism;ko01110//Biosynthesis of secondary metabolites	GO:0005794//Golgi apparatus;GO:0016023//cytoplasmic, membrane-bounded vesicle	GO:0016757//transferase activity, transferring glycosyl groups	GO:0000271//polysaccharide biosynthetic process	gi|113548332|dbj|BAF11775.1|/0/Os03g0300900 [Oryza sativa Japonica Group]
TCONS_00009978	up	1.89024	LOC_Os10g38160	up	2.28443	ko00980//Metabolism of xenobiotics by cytochrome P450;ko05200//Pathways in cancer;ko00480//Glutathione metabolism;ko00982//Drug metabolism - cytochrome P450;ko05215//Prostate cancer	GO:0005737//cytoplasm	GO:0004364//glutathione transferase activity	GO:0009407//toxin catabolic process;GO:0006749//glutathione metabolic process	gi|113639724|dbj|BAF27029.1|/9.78074e-170/Os10g0525600 [Oryza sativa Japonica Group]
TCONS_00065705	up	2.64989	LOC_Os03g11830	up	2.28201	-	-	GO:0008270//zinc ion binding	-	gi|108706867|gb|ABF94662.1|/0/Transposable element protein, putative, MuDR [Oryza sativa Japonica Group]
TCONS_00089479	up	3.07091	LOC_Os03g11830	up	2.28201	-	-	GO:0008270//zinc ion binding	-	gi|108706867|gb|ABF94662.1|/0/Transposable element protein, putative, MuDR [Oryza sativa Japonica Group]
TCONS_00065705	up	2.64989	LOC_Os04g48850	up	2.26403	ko00270//Cysteine and methionine metabolism;ko01100//Metabolic pathways;ko01110//Biosynthesis of secondary metabolites	-	GO:0030170//pyridoxal phosphate binding;GO:0003824//catalytic activity	GO:0009058//biosynthetic process	gi|32488497|emb|CAE03249.1|/0/OSJNBa0011J08.4 [Oryza sativa Japonica Group]
TCONS_00089479	up	3.07091	LOC_Os04g48850	up	2.26403	ko00270//Cysteine and methionine metabolism;ko01100//Metabolic pathways;ko01110//Biosynthesis of secondary metabolites	-	GO:0030170//pyridoxal phosphate binding;GO:0003824//catalytic activity	GO:0009058//biosynthetic process	gi|32488497|emb|CAE03249.1|/0/OSJNBa0011J08.4 [Oryza sativa Japonica Group]
TCONS_00065705	up	2.64989	LOC_Os07g35480	up	2.25652	ko04075//Plant hormone signal transduction	GO:0046658//anchored component of plasma membrane;GO:0016023//cytoplasmic, membrane-bounded vesicle	GO:0004553//hydrolase activity, hydrolyzing O-glycosyl compounds;GO:0030247//polysaccharide binding	GO:0005975//carbohydrate metabolic process	gi|113611419|dbj|BAF21797.1|/0/Os07g0539100 [Oryza sativa Japonica Group]
TCONS_00089479	up	3.07091	LOC_Os07g35480	up	2.25652	ko04075//Plant hormone signal transduction	GO:0046658//anchored component of plasma membrane;GO:0016023//cytoplasmic, membrane-bounded vesicle	GO:0004553//hydrolase activity, hydrolyzing O-glycosyl compounds;GO:0030247//polysaccharide binding	GO:0005975//carbohydrate metabolic process	gi|113611419|dbj|BAF21797.1|/0/Os07g0539100 [Oryza sativa Japonica Group]
TCONS_00056787	up	2.47695	LOC_Os09g21120	up	2.25573	ko04120//Ubiquitin mediated proteolysis;ko04141//Protein processing in endoplasmic reticulum	-	GO:0003824//catalytic activity	-	gi|255678852|dbj|BAF24963.2|/0/Os09g0378700 [Oryza sativa Japonica Group]
TCONS_00059316	up	2.2842	LOC_Os09g21120	up	2.25573	ko04120//Ubiquitin mediated proteolysis;ko04141//Protein processing in endoplasmic reticulum	-	GO:0003824//catalytic activity	-	gi|255678852|dbj|BAF24963.2|/0/Os09g0378700 [Oryza sativa Japonica Group]
TCONS_00059318	up	1.9494	LOC_Os09g21120	up	2.25573	ko04120//Ubiquitin mediated proteolysis;ko04141//Protein processing in endoplasmic reticulum	-	GO:0003824//catalytic activity	-	gi|255678852|dbj|BAF24963.2|/0/Os09g0378700 [Oryza sativa Japonica Group]
TCONS_00065705	up	2.64989	LOC_Os05g32110	up	2.25331	-	GO:0005886//plasma membrane;GO:0031225//anchored component of membrane;GO:0016021//integral component of membrane;GO:0016023//cytoplasmic, membrane-bounded vesicle	-	GO:0010215//cellulose microfibril organization;GO:0016049//cell growth	gi|75113832|sp|Q60E70.1|COBL3_ORYSJ;gi|125552171|gb|EAY97880.1|/0;0/RecName: Full=COBRA-like protein 3; AltName: Full=Protein BRITTLE CULM1-like 4; Flags: Precursor;hypothetical protein OsI_19799 [Oryza sativa Indica Group]
TCONS_00059316	up	2.2842	LOC_Os12g29400	up	2.24417	-	-	-	GO:0098755//maintenance of seed dormancy by absisic acid;GO:0009793//embryo development ending in seed dormancy;GO:0010029//regulation of seed germination	gi|1002310335|ref|XP_015618529.1|/4.39601e-170/PREDICTED: GEM-like protein 5 [Oryza sativa Japonica Group]
TCONS_00081336	up	7.85557	LOC_Os12g29400	up	2.24417	-	-	-	GO:0098755//maintenance of seed dormancy by absisic acid;GO:0009793//embryo development ending in seed dormancy;GO:0010029//regulation of seed germination	gi|1002310335|ref|XP_015618529.1|/4.39601e-170/PREDICTED: GEM-like protein 5 [Oryza sativa Japonica Group]
TCONS_00065705	up	2.64989	LOC_Os01g70190	up	2.23262	-	GO:0000139//Golgi membrane;GO:0016021//integral component of membrane;GO:0016023//cytoplasmic, membrane-bounded vesicle	GO:0016757//transferase activity, transferring glycosyl groups	GO:0071555//cell wall organization	gi|75159222|sp|Q8S1X8.1|GT14_ORYSJ/0/RecName: Full=Probable glucuronosyltransferase Os01g0926600
TCONS_00070703	up	3.1046	LOC_Os08g16120	up	2.22499	ko04626//Plant-pathogen interaction	GO:0016023//cytoplasmic, membrane-bounded vesicle;GO:0009536//plastid	GO:0043531//ADP binding	-	gi|113623361|dbj|BAF23306.1|/0/Os08g0261000 [Oryza sativa Japonica Group]
TCONS_00008924	up	2.83107	LOC_Os01g72900	up	2.22162	-	-	-	GO:0006950//response to stress	gi|573915411|ref|XP_006645360.1|/8.01999e-16/PREDICTED: abscisic stress-ripening protein 3-like [Oryza brachyantha]
TCONS_00091345	up	2.80973	LOC_Os01g72900	up	2.22162	-	-	-	GO:0006950//response to stress	gi|573915411|ref|XP_006645360.1|/8.01999e-16/PREDICTED: abscisic stress-ripening protein 3-like [Oryza brachyantha]
TCONS_00005792	up	2.63888	LOC_Os01g72900	up	2.22162	-	-	-	GO:0006950//response to stress	gi|573915411|ref|XP_006645360.1|/8.01999e-16/PREDICTED: abscisic stress-ripening protein 3-like [Oryza brachyantha]
TCONS_00010868	up	2.63376	LOC_Os01g72900	up	2.22162	-	-	-	GO:0006950//response to stress	gi|573915411|ref|XP_006645360.1|/8.01999e-16/PREDICTED: abscisic stress-ripening protein 3-like [Oryza brachyantha]
TCONS_00056787	up	2.47695	LOC_Os01g72900	up	2.22162	-	-	-	GO:0006950//response to stress	gi|573915411|ref|XP_006645360.1|/8.01999e-16/PREDICTED: abscisic stress-ripening protein 3-like [Oryza brachyantha]
TCONS_00059316	up	2.2842	LOC_Os01g72900	up	2.22162	-	-	-	GO:0006950//response to stress	gi|573915411|ref|XP_006645360.1|/8.01999e-16/PREDICTED: abscisic stress-ripening protein 3-like [Oryza brachyantha]
TCONS_00059822	up	2.24492	LOC_Os01g72900	up	2.22162	-	-	-	GO:0006950//response to stress	gi|573915411|ref|XP_006645360.1|/8.01999e-16/PREDICTED: abscisic stress-ripening protein 3-like [Oryza brachyantha]
TCONS_00059318	up	1.9494	LOC_Os01g72900	up	2.22162	-	-	-	GO:0006950//response to stress	gi|573915411|ref|XP_006645360.1|/8.01999e-16/PREDICTED: abscisic stress-ripening protein 3-like [Oryza brachyantha]
TCONS_00008924	up	2.83107	LOC_Os08g10500	up	2.21931	-	-	-	-	gi|1002288953|ref|XP_015648773.1|/1.11291e-12/PREDICTED: cysteine-rich and transmembrane domain-containing protein A [Oryza sativa Japonica Group]
TCONS_00091345	up	2.80973	LOC_Os08g10500	up	2.21931	-	-	-	-	gi|1002288953|ref|XP_015648773.1|/1.11291e-12/PREDICTED: cysteine-rich and transmembrane domain-containing protein A [Oryza sativa Japonica Group]
TCONS_00005792	up	2.63888	LOC_Os08g10500	up	2.21931	-	-	-	-	gi|1002288953|ref|XP_015648773.1|/1.11291e-12/PREDICTED: cysteine-rich and transmembrane domain-containing protein A [Oryza sativa Japonica Group]
TCONS_00010868	up	2.63376	LOC_Os08g10500	up	2.21931	-	-	-	-	gi|1002288953|ref|XP_015648773.1|/1.11291e-12/PREDICTED: cysteine-rich and transmembrane domain-containing protein A [Oryza sativa Japonica Group]
TCONS_00056787	up	2.47695	LOC_Os08g10500	up	2.21931	-	-	-	-	gi|1002288953|ref|XP_015648773.1|/1.11291e-12/PREDICTED: cysteine-rich and transmembrane domain-containing protein A [Oryza sativa Japonica Group]
TCONS_00059316	up	2.2842	LOC_Os08g10500	up	2.21931	-	-	-	-	gi|1002288953|ref|XP_015648773.1|/1.11291e-12/PREDICTED: cysteine-rich and transmembrane domain-containing protein A [Oryza sativa Japonica Group]
TCONS_00059822	up	2.24492	LOC_Os08g10500	up	2.21931	-	-	-	-	gi|1002288953|ref|XP_015648773.1|/1.11291e-12/PREDICTED: cysteine-rich and transmembrane domain-containing protein A [Oryza sativa Japonica Group]
TCONS_00059318	up	1.9494	LOC_Os08g10500	up	2.21931	-	-	-	-	gi|1002288953|ref|XP_015648773.1|/1.11291e-12/PREDICTED: cysteine-rich and transmembrane domain-containing protein A [Oryza sativa Japonica Group]
TCONS_00065705	up	2.64989	LOC_Os05g14240	up	2.20769	-	GO:0009705//plant-type vacuole membrane;GO:0005887//integral component of plasma membrane;GO:0042807//central vacuole	GO:0015254//glycerol channel activity;GO:0015250//water channel activity	GO:0009992//cellular water homeostasis;GO:0006833//water transport;GO:0015793//glycerol transport;GO:0034220//ion transmembrane transport	gi|75294967|sp|Q75GA5.1|TIP41_ORYSJ/3.27665e-123/RecName: Full=Probable aquaporin TIP4-1; AltName: Full=Tonoplast intrinsic protein 4-1; Short=OsTIP4;1
TCONS_00089479	up	3.07091	LOC_Os05g14240	up	2.20769	-	GO:0009705//plant-type vacuole membrane;GO:0005887//integral component of plasma membrane;GO:0042807//central vacuole	GO:0015254//glycerol channel activity;GO:0015250//water channel activity	GO:0009992//cellular water homeostasis;GO:0006833//water transport;GO:0015793//glycerol transport;GO:0034220//ion transmembrane transport	gi|75294967|sp|Q75GA5.1|TIP41_ORYSJ/3.27665e-123/RecName: Full=Probable aquaporin TIP4-1; AltName: Full=Tonoplast intrinsic protein 4-1; Short=OsTIP4;1
TCONS_00065705	up	2.64989	LOC_Os01g34890	up	2.20681	-	GO:0016021//integral component of membrane;GO:0000148//1,3-beta-D-glucan synthase complex	GO:0003843//1,3-beta-D-glucan synthase activity	GO:0006075//(1->3)-beta-D-glucan biosynthetic process	gi|218188390|gb|EEC70817.1|/0/hypothetical protein OsI_02281 [Oryza sativa Indica Group]
TCONS_00065705	up	2.64989	LOC_Os02g45040	up	2.2059	ko03008//Ribosome biogenesis in eukaryotes;ko03018//RNA degradation	GO:0009536//plastid	GO:0003677//DNA binding	GO:0006310//DNA recombination	gi|937905183|dbj|BAS80237.1|/0/Os02g0671800 [Oryza sativa Japonica Group]
TCONS_00089479	up	3.07091	LOC_Os02g45040	up	2.2059	ko03008//Ribosome biogenesis in eukaryotes;ko03018//RNA degradation	GO:0009536//plastid	GO:0003677//DNA binding	GO:0006310//DNA recombination	gi|937905183|dbj|BAS80237.1|/0/Os02g0671800 [Oryza sativa Japonica Group]
TCONS_00065705	up	2.64989	LOC_Os07g14150	up	2.19948	-	GO:0005829//cytosol	GO:0047974//guanosine deaminase activity;GO:0008270//zinc ion binding	GO:0009451//RNA modification	gi|1002280847|ref|XP_015644720.1|;gi|149392256|gb|ABR25967.1|;gi|992278950|gb|KXG37214.1|/1.98972e-58;2.60109e-67;5.41121e-115/PREDICTED: guanine deaminase [Oryza sativa Japonica Group];cytidine/deoxycytidylate deaminase family protein [Oryza sativa Indica Group] ;hypothetical protein SORBI_001G026900 [Sorghum bicolor]
TCONS_00089479	up	3.07091	LOC_Os07g14150	up	2.19948	-	GO:0005829//cytosol	GO:0047974//guanosine deaminase activity;GO:0008270//zinc ion binding	GO:0009451//RNA modification	gi|1002280847|ref|XP_015644720.1|;gi|149392256|gb|ABR25967.1|;gi|992278950|gb|KXG37214.1|/1.98972e-58;2.60109e-67;5.41121e-115/PREDICTED: guanine deaminase [Oryza sativa Japonica Group];cytidine/deoxycytidylate deaminase family protein [Oryza sativa Indica Group] ;hypothetical protein SORBI_001G026900 [Sorghum bicolor]
TCONS_00081336	up	7.85557	LOC_Os07g14150	up	2.19948	-	GO:0005829//cytosol	GO:0047974//guanosine deaminase activity;GO:0008270//zinc ion binding	GO:0009451//RNA modification	gi|1002280847|ref|XP_015644720.1|;gi|149392256|gb|ABR25967.1|;gi|992278950|gb|KXG37214.1|/1.98972e-58;2.60109e-67;5.41121e-115/PREDICTED: guanine deaminase [Oryza sativa Japonica Group];cytidine/deoxycytidylate deaminase family protein [Oryza sativa Indica Group] ;hypothetical protein SORBI_001G026900 [Sorghum bicolor]
TCONS_00065705	up	2.64989	LOC_Os10g16974	up	2.19409	ko00941//Flavonoid biosynthesis;ko01100//Metabolic pathways;ko01110//Biosynthesis of secondary metabolites;ko00944//Flavone and flavonol biosynthesis	GO:0016021//integral component of membrane;GO:0016023//cytoplasmic, membrane-bounded vesicle	GO:0005506//iron ion binding;GO:0016709//oxidoreductase activity, acting on paired donors, with incorporation or reduction of molecular oxygen, NAD(P)H as one donor, and incorporation of one atom of oxygen;GO:0020037//heme binding	GO:0044550//secondary metabolite biosynthetic process;GO:0055114//oxidation-reduction process	gi|113638942|dbj|BAF26247.1|/0/Os10g0317900 [Oryza sativa Japonica Group]
TCONS_00056787	up	2.47695	LOC_Os02g48360	up	2.19361	ko00230//Purine metabolism;ko00051//Fructose and mannose metabolism;ko01100//Metabolic pathways;ko01110//Biosynthesis of secondary metabolites	GO:0005737//cytoplasm	GO:0003872//6-phosphofructokinase activity;GO:0047334//diphosphate-fructose-6-phosphate 1-phosphotransferase activity;GO:0005524//ATP binding	GO:0061615//glycolytic process through fructose-6-phosphate;GO:0046835//carbohydrate phosphorylation;GO:0006002//fructose 6-phosphate metabolic process	gi|113537449|dbj|BAF09832.1|/0/Os02g0714200 [Oryza sativa Japonica Group]
TCONS_00059316	up	2.2842	LOC_Os02g48360	up	2.19361	ko00230//Purine metabolism;ko00051//Fructose and mannose metabolism;ko01100//Metabolic pathways;ko01110//Biosynthesis of secondary metabolites	GO:0005737//cytoplasm	GO:0003872//6-phosphofructokinase activity;GO:0047334//diphosphate-fructose-6-phosphate 1-phosphotransferase activity;GO:0005524//ATP binding	GO:0061615//glycolytic process through fructose-6-phosphate;GO:0046835//carbohydrate phosphorylation;GO:0006002//fructose 6-phosphate metabolic process	gi|113537449|dbj|BAF09832.1|/0/Os02g0714200 [Oryza sativa Japonica Group]
TCONS_00065705	up	2.64989	LOC_Os09g19970	up	2.18851	-	GO:0016021//integral component of membrane	-	-	gi|113631232|dbj|BAF24913.1|/1.58546e-66/Os09g0364400 [Oryza sativa Japonica Group]
TCONS_00089479	up	3.07091	LOC_Os09g19970	up	2.18851	-	GO:0016021//integral component of membrane	-	-	gi|113631232|dbj|BAF24913.1|/1.58546e-66/Os09g0364400 [Oryza sativa Japonica Group]
TCONS_00081336	up	7.85557	LOC_Os09g19970	up	2.18851	-	GO:0016021//integral component of membrane	-	-	gi|113631232|dbj|BAF24913.1|/1.58546e-66/Os09g0364400 [Oryza sativa Japonica Group]
TCONS_00056787	up	2.47695	LOC_Os04g51160	up	2.18335	-	GO:0016021//integral component of membrane;GO:0070469//respiratory chain;GO:0005739//mitochondrion	GO:0009916//alternative oxidase activity;GO:0046872//metal ion binding	GO:0055114//oxidation-reduction process	gi|3218543|dbj|BAA28771.1|/0/alternative oxidase [Oryza sativa Japonica Group]
TCONS_00065705	up	2.64989	LOC_Os06g48180	up	2.17897	ko04075//Plant hormone signal transduction	GO:0005618//cell wall;GO:0048046//apoplast;GO:0016023//cytoplasmic, membrane-bounded vesicle	GO:0004553//hydrolase activity, hydrolyzing O-glycosyl compounds;GO:0016762//xyloglucan:xyloglucosyl transferase activity	GO:0071555//cell wall organization;GO:0010411//xyloglucan metabolic process;GO:0042546//cell wall biogenesis	gi|113596497|dbj|BAF20371.1|/0/Os06g0696600 [Oryza sativa Japonica Group]
TCONS_00089479	up	3.07091	LOC_Os06g48180	up	2.17897	ko04075//Plant hormone signal transduction	GO:0005618//cell wall;GO:0048046//apoplast;GO:0016023//cytoplasmic, membrane-bounded vesicle	GO:0004553//hydrolase activity, hydrolyzing O-glycosyl compounds;GO:0016762//xyloglucan:xyloglucosyl transferase activity	GO:0071555//cell wall organization;GO:0010411//xyloglucan metabolic process;GO:0042546//cell wall biogenesis	gi|113596497|dbj|BAF20371.1|/0/Os06g0696600 [Oryza sativa Japonica Group]
TCONS_00089479	up	3.07091	LOC_Os04g49450	up	2.1744	ko04712//Circadian rhythm - plant	GO:0005634//nucleus	GO:0003677//DNA binding	GO:0006355//regulation of transcription, DNA-templated	gi|261488390|emb|CBH19570.1|;gi|38346813|emb|CAD41380.2|/0;0/DNA binding domain protein [Oryza sativa Indica Group];OSJNBa0088A01.20 [Oryza sativa Japonica Group]
TCONS_00059316	up	2.2842	LOC_Os02g54254	up	2.16239	ko00310//Lysine degradation;ko01100//Metabolic pathways;ko01110//Biosynthesis of secondary metabolites	GO:0016021//integral component of membrane	GO:0016491//oxidoreductase activity	GO:0055114//oxidation-reduction process	gi|311893431|dbj|BAJ25847.1|;gi|47497245|dbj|BAD19289.1|/0;2.67344e-156/lysine ketoglutarate reductase/saccharopine dehydrogenase [Oryza sativa Japonica Group];lysine-ketoglutarate reductase/saccharopine dehydrogenase bifunctional enzyme-like [Oryza sativa Japonica Group]
TCONS_00059318	up	1.9494	LOC_Os02g54254	up	2.16239	ko00310//Lysine degradation;ko01100//Metabolic pathways;ko01110//Biosynthesis of secondary metabolites	GO:0016021//integral component of membrane	GO:0016491//oxidoreductase activity	GO:0055114//oxidation-reduction process	gi|311893431|dbj|BAJ25847.1|;gi|47497245|dbj|BAD19289.1|/0;2.67344e-156/lysine ketoglutarate reductase/saccharopine dehydrogenase [Oryza sativa Japonica Group];lysine-ketoglutarate reductase/saccharopine dehydrogenase bifunctional enzyme-like [Oryza sativa Japonica Group]
TCONS_00059316	up	2.2842	LOC_Os03g27980	up	2.15542	ko04075//Plant hormone signal transduction	GO:0046658//anchored component of plasma membrane	GO:0004553//hydrolase activity, hydrolyzing O-glycosyl compounds;GO:0030247//polysaccharide binding	GO:0005975//carbohydrate metabolic process	gi|255674565|dbj|BAH92189.1|/0/Os03g0397600 [Oryza sativa Japonica Group]
TCONS_00059318	up	1.9494	LOC_Os03g27980	up	2.15542	ko04075//Plant hormone signal transduction	GO:0046658//anchored component of plasma membrane	GO:0004553//hydrolase activity, hydrolyzing O-glycosyl compounds;GO:0030247//polysaccharide binding	GO:0005975//carbohydrate metabolic process	gi|255674565|dbj|BAH92189.1|/0/Os03g0397600 [Oryza sativa Japonica Group]
TCONS_00008924	up	2.83107	LOC_Os06g47130	up	2.15454	-	GO:0016021//integral component of membrane;GO:0005783//endoplasmic reticulum	GO:0008289//lipid binding	-	gi|937924273|dbj|BAS99190.1|;gi|52076667|dbj|BAD45567.1|/0;0/Os06g0685300 [Oryza sativa Japonica Group];putative CLB1 protein [Oryza sativa Japonica Group]
TCONS_00091345	up	2.80973	LOC_Os06g47130	up	2.15454	-	GO:0016021//integral component of membrane;GO:0005783//endoplasmic reticulum	GO:0008289//lipid binding	-	gi|937924273|dbj|BAS99190.1|;gi|52076667|dbj|BAD45567.1|/0;0/Os06g0685300 [Oryza sativa Japonica Group];putative CLB1 protein [Oryza sativa Japonica Group]
TCONS_00005792	up	2.63888	LOC_Os06g47130	up	2.15454	-	GO:0016021//integral component of membrane;GO:0005783//endoplasmic reticulum	GO:0008289//lipid binding	-	gi|937924273|dbj|BAS99190.1|;gi|52076667|dbj|BAD45567.1|/0;0/Os06g0685300 [Oryza sativa Japonica Group];putative CLB1 protein [Oryza sativa Japonica Group]
TCONS_00010868	up	2.63376	LOC_Os06g47130	up	2.15454	-	GO:0016021//integral component of membrane;GO:0005783//endoplasmic reticulum	GO:0008289//lipid binding	-	gi|937924273|dbj|BAS99190.1|;gi|52076667|dbj|BAD45567.1|/0;0/Os06g0685300 [Oryza sativa Japonica Group];putative CLB1 protein [Oryza sativa Japonica Group]
TCONS_00056787	up	2.47695	LOC_Os06g47130	up	2.15454	-	GO:0016021//integral component of membrane;GO:0005783//endoplasmic reticulum	GO:0008289//lipid binding	-	gi|937924273|dbj|BAS99190.1|;gi|52076667|dbj|BAD45567.1|/0;0/Os06g0685300 [Oryza sativa Japonica Group];putative CLB1 protein [Oryza sativa Japonica Group]
TCONS_00059316	up	2.2842	LOC_Os06g47130	up	2.15454	-	GO:0016021//integral component of membrane;GO:0005783//endoplasmic reticulum	GO:0008289//lipid binding	-	gi|937924273|dbj|BAS99190.1|;gi|52076667|dbj|BAD45567.1|/0;0/Os06g0685300 [Oryza sativa Japonica Group];putative CLB1 protein [Oryza sativa Japonica Group]
TCONS_00059822	up	2.24492	LOC_Os06g47130	up	2.15454	-	GO:0016021//integral component of membrane;GO:0005783//endoplasmic reticulum	GO:0008289//lipid binding	-	gi|937924273|dbj|BAS99190.1|;gi|52076667|dbj|BAD45567.1|/0;0/Os06g0685300 [Oryza sativa Japonica Group];putative CLB1 protein [Oryza sativa Japonica Group]
TCONS_00065705	up	2.64989	LOC_Os08g42960	up	2.14386	-	GO:0016021//integral component of membrane	-	-	gi|113624363|dbj|BAF24308.1|/0/Os08g0542700 [Oryza sativa Japonica Group]
TCONS_00065705	up	2.64989	LOC_Os02g02780	up	2.13808	ko04075//Plant hormone signal transduction;ko04530//Tight junction;ko04010//MAPK signaling pathway	GO:0009536//plastid	GO:0016597//amino acid binding;GO:0005524//ATP binding;GO:0004674//protein serine/threonine kinase activity	GO:0006468//protein phosphorylation	gi|113535237|dbj|BAF07620.1|/0/Os02g0120100 [Oryza sativa Japonica Group]
TCONS_00089479	up	3.07091	LOC_Os02g02780	up	2.13808	ko04075//Plant hormone signal transduction;ko04530//Tight junction;ko04010//MAPK signaling pathway	GO:0009536//plastid	GO:0016597//amino acid binding;GO:0005524//ATP binding;GO:0004674//protein serine/threonine kinase activity	GO:0006468//protein phosphorylation	gi|113535237|dbj|BAF07620.1|/0/Os02g0120100 [Oryza sativa Japonica Group]
TCONS_00005781	up	3.08006	LOC_Os04g37570	up	2.12853	ko00903//Limonene and pinene degradation;ko00642//Ethylbenzene degradation;ko00362//Benzoate degradation;ko00240//Pyrimidine metabolism;ko00051//Fructose and mannose metabolism;ko01120//Microbial metabolism in diverse environments;ko01100//Metabolic pathways;ko00627//Aminobenzoate degradation;ko00350//Tyrosine metabolism	GO:0016020//membrane	GO:0004190//aspartic-type endopeptidase activity	GO:0006508//proteolysis;GO:0030163//protein catabolic process	gi|38344830|emb|CAD40872.2|/0/OSJNBa0064H22.11 [Oryza sativa Japonica Group]
TCONS_00089479	up	3.07091	LOC_Os06g36560	up	2.12756	ko00562//Inositol phosphate metabolism;ko00053//Ascorbate and aldarate metabolism	GO:0005737//cytoplasm	GO:0005506//iron ion binding;GO:0050113//inositol oxygenase activity	GO:0019310//inositol catabolic process;GO:0055114//oxidation-reduction process	gi|75112464|sp|Q5Z8T3.1|MIOX_ORYSJ/0/RecName: Full=Probable inositol oxygenase; AltName: Full=Myo-inositol oxygenase; Short=MI oxygenase
TCONS_00070703	up	3.1046	LOC_Os08g43400	up	2.12543	-	-	-	-	gi|222640978|gb|EEE69110.1|;gi|937931640|dbj|BAT06556.1|;gi|113624398|dbj|BAF24343.1|/0;0;0/hypothetical protein OsJ_28179 [Oryza sativa Japonica Group];Os08g0547500 [Oryza sativa Japonica Group];Os08g0547500 [Oryza sativa Japonica Group]
TCONS_00065705	up	2.64989	LOC_Os09g26780	up	2.12255	ko04626//Plant-pathogen interaction;ko04075//Plant hormone signal transduction	GO:0005829//cytosol;GO:0005634//nucleus	GO:0003714//transcription corepressor activity	GO:1903507//negative regulation of nucleic acid-templated transcription;GO:2000022//regulation of jasmonic acid mediated signaling pathway;GO:0009611//response to wounding;GO:0006355//regulation of transcription, DNA-templated;GO:0031347//regulation of defense response	gi|75118454|sp|Q69P94.1|TI10C_ORYSJ/3.53152e-132/RecName: Full=Protein TIFY 10c; Short=OsTIFY10c; AltName: Full=Jasmonate ZIM domain-containing protein 8; Short=OsJAZ8; AltName: Full=OsJAZ7
TCONS_00089479	up	3.07091	LOC_Os09g26780	up	2.12255	ko04626//Plant-pathogen interaction;ko04075//Plant hormone signal transduction	GO:0005829//cytosol;GO:0005634//nucleus	GO:0003714//transcription corepressor activity	GO:1903507//negative regulation of nucleic acid-templated transcription;GO:2000022//regulation of jasmonic acid mediated signaling pathway;GO:0009611//response to wounding;GO:0006355//regulation of transcription, DNA-templated;GO:0031347//regulation of defense response	gi|75118454|sp|Q69P94.1|TI10C_ORYSJ/3.53152e-132/RecName: Full=Protein TIFY 10c; Short=OsTIFY10c; AltName: Full=Jasmonate ZIM domain-containing protein 8; Short=OsJAZ8; AltName: Full=OsJAZ7
TCONS_00056787	up	2.47695	LOC_Os05g33644	up	2.11975	ko00240//Pyrimidine metabolism	-	-	-	gi|1002266785|ref|XP_015637724.1|/0/PREDICTED: uncharacterized protein LOC4338757 isoform X1 [Oryza sativa Japonica Group]
TCONS_00070703	up	3.1046	LOC_Os03g50810	up	2.11782	ko00903//Limonene and pinene degradation;ko00642//Ethylbenzene degradation;ko00362//Benzoate degradation;ko00240//Pyrimidine metabolism;ko00051//Fructose and mannose metabolism;ko01120//Microbial metabolism in diverse environments;ko01100//Metabolic pathways;ko00627//Aminobenzoate degradation;ko00350//Tyrosine metabolism	GO:0016021//integral component of membrane	GO:0005524//ATP binding;GO:0004674//protein serine/threonine kinase activity	GO:0006468//protein phosphorylation	gi|108710763|gb|ABF98558.1|/0/Protein kinase domain containing protein, expressed [Oryza sativa Japonica Group]
TCONS_00081336	up	7.85557	LOC_Os11g36200	up	2.1153	ko04626//Plant-pathogen interaction	-	GO:0016301//kinase activity	GO:0016310//phosphorylation	gi|1002303385|ref|XP_015615078.1|/0/PREDICTED: putative receptor-like protein kinase At3g47110 isoform X1 [Oryza sativa Japonica Group]
TCONS_00070703	up	3.1046	LOC_Os08g10300	up	2.11507	ko05142//Chagas disease (American trypanosomiasis);ko05133//Pertussis;ko05145//Toxoplasmosis;ko04722//Neurotrophin signaling pathway;ko05162//Measles;ko04620//Toll-like receptor signaling pathway;ko05164//Influenza A;ko05140//Leishmaniasis;ko05152//Tuberculosis;ko04064//NF-kappa B signaling pathway;ko04210//Apoptosis	GO:0005886//plasma membrane;GO:0016021//integral component of membrane;GO:0016023//cytoplasmic, membrane-bounded vesicle;GO:0005739//mitochondrion	GO:0005524//ATP binding;GO:0004674//protein serine/threonine kinase activity	GO:0006468//protein phosphorylation	gi|1002291244|ref|XP_015649960.1|/0/PREDICTED: probable LRR receptor-like serine/threonine-protein kinase At1g56140 [Oryza sativa Japonica Group]
TCONS_00070703	up	3.1046	LOC_Os02g09940	up	2.10881	ko04146//Peroxisome;ko05146//Amoebiasis	GO:0009570//chloroplast stroma	GO:0004601//peroxidase activity;GO:0051920//peroxiredoxin activity	GO:0098869//cellular oxidant detoxification;GO:0055114//oxidation-reduction process	gi|75139348|sp|Q7F8S5.1|PR2E2_ORYSJ/1.51111e-112/RecName: Full=Peroxiredoxin-2E-2, chloroplastic; AltName: Full=Peroxiredoxin IIE-2; AltName: Full=Thioredoxin reductase 2E-2; Flags: Precursor
TCONS_00009978	up	1.89024	LOC_Os02g37700	up	2.10246	ko00564//Glycerophospholipid metabolism;ko04142//Lysosome	-	GO:0008374//O-acyltransferase activity	GO:0006629//lipid metabolic process	gi|255671041|dbj|BAF09195.2|/0/Os02g0589700 [Oryza sativa Japonica Group]
TCONS_00089479	up	3.07091	LOC_Os03g49380	up	2.09855	ko00591//Linoleic acid metabolism	-	GO:0046872//metal ion binding;GO:0016702//oxidoreductase activity, acting on single donors with incorporation of molecular oxygen, incorporation of two atoms of oxygen	GO:0031408//oxylipin biosynthetic process;GO:0055114//oxidation-reduction process	gi|73920878|sp|Q53RB0.1|LOX4_ORYSJ;gi|108710598|gb|ABF98393.1|/0;0/RecName: Full=Probable linoleate 9S-lipoxygenase 4; AltName: Full=Lipoxygenase 4;Lipoxygenase 3, putative, expressed [Oryza sativa Japonica Group]
TCONS_00059316	up	2.2842	LOC_Os05g46350	up	2.0984	-	-	-	-	gi|113579737|dbj|BAF18100.1|/0/Os05g0541100 [Oryza sativa Japonica Group]
TCONS_00081336	up	7.85557	LOC_Os05g46350	up	2.0984	-	-	-	-	gi|113579737|dbj|BAF18100.1|/0/Os05g0541100 [Oryza sativa Japonica Group]
TCONS_00009978	up	1.89024	LOC_Os10g42610	up	2.09815	-	GO:0009536//plastid	-	-	gi|31433670|gb|AAP55154.1|;gi|78709047|gb|ABB48022.1|/1.42105e-84;3.00859e-71/expressed protein [Oryza sativa Japonica Group];expressed protein [Oryza sativa Japonica Group]
TCONS_00059316	up	2.2842	LOC_Os02g45780	up	2.08873	ko01100//Metabolic pathways;ko00563//Glycosylphosphatidylinositol(GPI)-anchor biosynthesis	GO:0016023//cytoplasmic, membrane-bounded vesicle	GO:0008270//zinc ion binding	-	gi|113537281|dbj|BAF09664.1|/1.2621e-78/Os02g0682300 [Oryza sativa Japonica Group]
TCONS_00081336	up	7.85557	LOC_Os02g45780	up	2.08873	ko01100//Metabolic pathways;ko00563//Glycosylphosphatidylinositol(GPI)-anchor biosynthesis	GO:0016023//cytoplasmic, membrane-bounded vesicle	GO:0008270//zinc ion binding	-	gi|113537281|dbj|BAF09664.1|/1.2621e-78/Os02g0682300 [Oryza sativa Japonica Group]
TCONS_00059318	up	1.9494	LOC_Os02g45780	up	2.08873	ko01100//Metabolic pathways;ko00563//Glycosylphosphatidylinositol(GPI)-anchor biosynthesis	GO:0016023//cytoplasmic, membrane-bounded vesicle	GO:0008270//zinc ion binding	-	gi|113537281|dbj|BAF09664.1|/1.2621e-78/Os02g0682300 [Oryza sativa Japonica Group]
TCONS_00081336	up	7.85557	LOC_Os09g04970	up	2.08062	-	-	-	-	gi|62733859|gb|AAX95968.1|/0/retrotransposon protein, putative, Ty3-gypsy sub-class [Oryza sativa Japonica Group]
TCONS_00009978	up	1.89024	LOC_Os12g29580	up	2.07995	-	GO:0005737//cytoplasm;GO:0005634//nucleus;GO:0005886//plasma membrane	GO:0004674//protein serine/threonine kinase activity;GO:0005524//ATP binding	GO:0006468//protein phosphorylation;GO:0035556//intracellular signal transduction	gi|255670306|dbj|BAF29788.2|;gi|1002313529|ref|XP_015620136.1|/0;0/Os12g0480200 [Oryza sativa Japonica Group];PREDICTED: serine/threonine-protein kinase D6PKL1 [Oryza sativa Japonica Group]
TCONS_00008924	up	2.83107	LOC_Os06g48300	up	2.07675	ko04075//Plant hormone signal transduction	-	GO:0046872//metal ion binding;GO:0004722//protein serine/threonine phosphatase activity	GO:0006470//protein dephosphorylation	gi|113596504|dbj|BAF20378.1|/0/Os06g0698300 [Oryza sativa Japonica Group]
TCONS_00091345	up	2.80973	LOC_Os06g48300	up	2.07675	ko04075//Plant hormone signal transduction	-	GO:0046872//metal ion binding;GO:0004722//protein serine/threonine phosphatase activity	GO:0006470//protein dephosphorylation	gi|113596504|dbj|BAF20378.1|/0/Os06g0698300 [Oryza sativa Japonica Group]
TCONS_00005792	up	2.63888	LOC_Os06g48300	up	2.07675	ko04075//Plant hormone signal transduction	-	GO:0046872//metal ion binding;GO:0004722//protein serine/threonine phosphatase activity	GO:0006470//protein dephosphorylation	gi|113596504|dbj|BAF20378.1|/0/Os06g0698300 [Oryza sativa Japonica Group]
TCONS_00010868	up	2.63376	LOC_Os06g48300	up	2.07675	ko04075//Plant hormone signal transduction	-	GO:0046872//metal ion binding;GO:0004722//protein serine/threonine phosphatase activity	GO:0006470//protein dephosphorylation	gi|113596504|dbj|BAF20378.1|/0/Os06g0698300 [Oryza sativa Japonica Group]
TCONS_00059316	up	2.2842	LOC_Os06g48300	up	2.07675	ko04075//Plant hormone signal transduction	-	GO:0046872//metal ion binding;GO:0004722//protein serine/threonine phosphatase activity	GO:0006470//protein dephosphorylation	gi|113596504|dbj|BAF20378.1|/0/Os06g0698300 [Oryza sativa Japonica Group]
TCONS_00059822	up	2.24492	LOC_Os06g48300	up	2.07675	ko04075//Plant hormone signal transduction	-	GO:0046872//metal ion binding;GO:0004722//protein serine/threonine phosphatase activity	GO:0006470//protein dephosphorylation	gi|113596504|dbj|BAF20378.1|/0/Os06g0698300 [Oryza sativa Japonica Group]
TCONS_00059318	up	1.9494	LOC_Os06g48300	up	2.07675	ko04075//Plant hormone signal transduction	-	GO:0046872//metal ion binding;GO:0004722//protein serine/threonine phosphatase activity	GO:0006470//protein dephosphorylation	gi|113596504|dbj|BAF20378.1|/0/Os06g0698300 [Oryza sativa Japonica Group]
TCONS_00070703	up	3.1046	LOC_Os09g37200	up	2.0763	ko00941//Flavonoid biosynthesis;ko00940//Phenylpropanoid biosynthesis;ko00945//Stilbenoid, diarylheptanoid and gingerol biosynthesis;ko01110//Biosynthesis of secondary metabolites	-	GO:0016747//transferase activity, transferring acyl groups other than amino-acyl groups	-	gi|113632062|dbj|BAF25743.1|/0/Os09g0544000 [Oryza sativa Japonica Group]
TCONS_00011723	up	1.58332	LOC_Os09g37200	up	2.0763	ko00941//Flavonoid biosynthesis;ko00940//Phenylpropanoid biosynthesis;ko00945//Stilbenoid, diarylheptanoid and gingerol biosynthesis;ko01110//Biosynthesis of secondary metabolites	-	GO:0016747//transferase activity, transferring acyl groups other than amino-acyl groups	-	gi|113632062|dbj|BAF25743.1|/0/Os09g0544000 [Oryza sativa Japonica Group]
TCONS_00065705	up	2.64989	LOC_Os01g03390	up	2.07254	-	GO:0005576//extracellular region;GO:0016023//cytoplasmic, membrane-bounded vesicle	GO:0004867//serine-type endopeptidase inhibitor activity	GO:0010951//negative regulation of endopeptidase activity	gi|7635919|emb|CAB88391.1|/5.13657e-90/putative Bowman Birk trypsin inhibitor [Oryza sativa Indica Group]
TCONS_00089479	up	3.07091	LOC_Os01g03390	up	2.07254	-	GO:0005576//extracellular region;GO:0016023//cytoplasmic, membrane-bounded vesicle	GO:0004867//serine-type endopeptidase inhibitor activity	GO:0010951//negative regulation of endopeptidase activity	gi|7635919|emb|CAB88391.1|/5.13657e-90/putative Bowman Birk trypsin inhibitor [Oryza sativa Indica Group]
TCONS_00070703	up	3.1046	LOC_Os07g47700	up	2.07002	ko00521//Streptomycin biosynthesis;ko03440//Homologous recombination;ko00520//Amino sugar and nucleotide sugar metabolism;ko01100//Metabolic pathways;ko00523//Polyketide sugar unit biosynthesis;ko02010//ABC transporters;ko03430//Mismatch repair;ko01110//Biosynthesis of secondary metabolites;ko03030//DNA replication	GO:0016021//integral component of membrane	-	-	gi|50284521|dbj|BAD29712.1|/0/UDP-glucuronic acid decarboxylase [Oryza sativa Japonica Group]
TCONS_00008924	up	2.83107	LOC_Os11g47840	up	2.06932	-	GO:0005794//Golgi apparatus;GO:0016021//integral component of membrane	GO:0004252//serine-type endopeptidase activity	GO:0016485//protein processing	gi|113645769|dbj|BAF28910.1|/0/Os11g0704800 [Oryza sativa Japonica Group]
TCONS_00010868	up	2.63376	LOC_Os11g47840	up	2.06932	-	GO:0005794//Golgi apparatus;GO:0016021//integral component of membrane	GO:0004252//serine-type endopeptidase activity	GO:0016485//protein processing	gi|113645769|dbj|BAF28910.1|/0/Os11g0704800 [Oryza sativa Japonica Group]
TCONS_00059316	up	2.2842	LOC_Os11g47840	up	2.06932	-	GO:0005794//Golgi apparatus;GO:0016021//integral component of membrane	GO:0004252//serine-type endopeptidase activity	GO:0016485//protein processing	gi|113645769|dbj|BAF28910.1|/0/Os11g0704800 [Oryza sativa Japonica Group]
TCONS_00070703	up	3.1046	LOC_Os07g03020	up	2.06589	-	-	-	-	gi|125598962|gb|EAZ38538.1|/0/hypothetical protein OsJ_22926 [Oryza sativa Japonica Group]
TCONS_00065705	up	2.64989	LOC_Os05g06390	up	2.06204	ko03013//RNA transport;ko03015//mRNA surveillance pathway;ko03008//Ribosome biogenesis in eukaryotes;ko03018//RNA degradation	GO:0005739//mitochondrion	GO:0003676//nucleic acid binding	-	gi|45267888|gb|AAS55787.1|/0/hypothetical protein [Oryza sativa Japonica Group]
TCONS_00089479	up	3.07091	LOC_Os05g06390	up	2.06204	ko03013//RNA transport;ko03015//mRNA surveillance pathway;ko03008//Ribosome biogenesis in eukaryotes;ko03018//RNA degradation	GO:0005739//mitochondrion	GO:0003676//nucleic acid binding	-	gi|45267888|gb|AAS55787.1|/0/hypothetical protein [Oryza sativa Japonica Group]
TCONS_00081336	up	7.85557	LOC_Os05g06390	up	2.06204	ko03013//RNA transport;ko03015//mRNA surveillance pathway;ko03008//Ribosome biogenesis in eukaryotes;ko03018//RNA degradation	GO:0005739//mitochondrion	GO:0003676//nucleic acid binding	-	gi|45267888|gb|AAS55787.1|/0/hypothetical protein [Oryza sativa Japonica Group]
TCONS_00065705	up	2.64989	LOC_Os05g08370	up	2.06125	-	GO:0005886//plasma membrane;GO:0016021//integral component of membrane	GO:0046872//metal ion binding;GO:0016760//cellulose synthase (UDP-forming) activity	GO:0071555//cell wall organization;GO:0030244//cellulose biosynthetic process	gi|75254483|sp|Q6AT26.1|CESA1_ORYSJ/0/RecName: Full=Probable cellulose synthase A catalytic subunit 1 [UDP-forming]; AltName: Full=OsCesA1
TCONS_00056787	up	2.47695	LOC_Os01g62900	up	2.05728	ko00330//Arginine and proline metabolism;ko01100//Metabolic pathways	GO:0005737//cytoplasm	GO:0004349//glutamate 5-kinase activity;GO:0004350//glutamate-5-semialdehyde dehydrogenase activity	GO:0016310//phosphorylation;GO:0006561//proline biosynthetic process;GO:0055114//oxidation-reduction process	gi|113534333|dbj|BAF06716.1|/0/Os01g0848200 [Oryza sativa Japonica Group]
TCONS_00059822	up	2.24492	LOC_Os01g62900	up	2.05728	ko00330//Arginine and proline metabolism;ko01100//Metabolic pathways	GO:0005737//cytoplasm	GO:0004349//glutamate 5-kinase activity;GO:0004350//glutamate-5-semialdehyde dehydrogenase activity	GO:0016310//phosphorylation;GO:0006561//proline biosynthetic process;GO:0055114//oxidation-reduction process	gi|113534333|dbj|BAF06716.1|/0/Os01g0848200 [Oryza sativa Japonica Group]
TCONS_00081336	up	7.85557	LOC_Os03g35560	up	2.04637	ko05166//HTLV-I infection;ko04115//p53 signaling pathway;ko00900//Terpenoid backbone biosynthesis;ko04110//Cell cycle;ko00908//Zeatin biosynthesis;ko05202//Transcriptional misregulation in cancer;ko01100//Metabolic pathways;ko03008//Ribosome biogenesis in eukaryotes;ko04064//NF-kappa B signaling pathway;ko01110//Biosynthesis of secondary metabolites;ko04210//Apoptosis;ko03018//RNA degradation	-	GO:0003676//nucleic acid binding;GO:0008270//zinc ion binding	GO:0015074//DNA integration	gi|108709252|gb|ABF97047.1|/0/retrotransposon protein, putative, Ty1-copia subclass [Oryza sativa Japonica Group]
TCONS_00065705	up	2.64989	LOC_Os10g26720	up	2.04481	-	-	-	-	gi|937935871|dbj|BAT10785.1|/0/Os10g0407400 [Oryza sativa Japonica Group]
TCONS_00089479	up	3.07091	LOC_Os10g26720	up	2.04481	-	-	-	-	gi|937935871|dbj|BAT10785.1|/0/Os10g0407400 [Oryza sativa Japonica Group]
TCONS_00065705	up	2.64989	LOC_Os11g45740	up	2.04436	-	-	GO:0003677//DNA binding	-	gi|13177578|gb|AAK08983.1|/0/Myb transcription factor JAMyb [Oryza sativa Japonica Group]
TCONS_00089479	up	3.07091	LOC_Os11g45740	up	2.04436	-	-	GO:0003677//DNA binding	-	gi|13177578|gb|AAK08983.1|/0/Myb transcription factor JAMyb [Oryza sativa Japonica Group]
TCONS_00070703	up	3.1046	LOC_Os02g55590	up	2.03022	-	GO:0016021//integral component of membrane	-	-	gi|113537939|dbj|BAF10322.1|;gi|937906340|dbj|BAS81394.1|/0;0/Os02g0799300 [Oryza sativa Japonica Group];Os02g0799300, partial [Oryza sativa Japonica Group]
TCONS_00008924	up	2.83107	LOC_Os08g41130	up	2.01866	-	-	GO:0008270//zinc ion binding	-	gi|113632167|dbj|BAF25848.1|/0/Os09g0562400 [Oryza sativa Japonica Group]
TCONS_00091345	up	2.80973	LOC_Os08g41130	up	2.01866	-	-	GO:0008270//zinc ion binding	-	gi|113632167|dbj|BAF25848.1|/0/Os09g0562400 [Oryza sativa Japonica Group]
TCONS_00005792	up	2.63888	LOC_Os08g41130	up	2.01866	-	-	GO:0008270//zinc ion binding	-	gi|113632167|dbj|BAF25848.1|/0/Os09g0562400 [Oryza sativa Japonica Group]
TCONS_00056787	up	2.47695	LOC_Os08g41130	up	2.01866	-	-	GO:0008270//zinc ion binding	-	gi|113632167|dbj|BAF25848.1|/0/Os09g0562400 [Oryza sativa Japonica Group]
TCONS_00059822	up	2.24492	LOC_Os08g41130	up	2.01866	-	-	GO:0008270//zinc ion binding	-	gi|113632167|dbj|BAF25848.1|/0/Os09g0562400 [Oryza sativa Japonica Group]
TCONS_00059316	up	2.2842	LOC_Os01g72970	up	2.01496	-	-	-	-	gi|20146230|dbj|BAB89012.1|/0/bzip transcription factor-like [Oryza sativa Japonica Group]
TCONS_00059318	up	1.9494	LOC_Os01g72970	up	2.01496	-	-	-	-	gi|20146230|dbj|BAB89012.1|/0/bzip transcription factor-like [Oryza sativa Japonica Group]
TCONS_00056787	up	2.47695	LOC_Os03g06510	up	2.01279	-	-	-	-	gi|108706311|gb|ABF94106.1|/0/Viral A-type inclusion protein repeat containing protein, expressed [Oryza sativa Japonica Group]
TCONS_00059316	up	2.2842	LOC_Os09g24850	up	2.00897	-	-	GO:0003964//RNA-directed DNA polymerase activity;GO:0003677//DNA binding;GO:0003682//chromatin binding;GO:0003723//RNA binding;GO:0004190//aspartic-type endopeptidase activity	GO:0006333//chromatin assembly or disassembly;GO:0006278//RNA-dependent DNA biosynthetic process;GO:0006508//proteolysis;GO:0006310//DNA recombination	gi|78708062|gb|ABB47037.1|/0/retrotransposon protein, putative, unclassified, expressed [Oryza sativa Japonica Group]
TCONS_00081336	up	7.85557	LOC_Os09g24850	up	2.00897	-	-	GO:0003964//RNA-directed DNA polymerase activity;GO:0003677//DNA binding;GO:0003682//chromatin binding;GO:0003723//RNA binding;GO:0004190//aspartic-type endopeptidase activity	GO:0006333//chromatin assembly or disassembly;GO:0006278//RNA-dependent DNA biosynthetic process;GO:0006508//proteolysis;GO:0006310//DNA recombination	gi|78708062|gb|ABB47037.1|/0/retrotransposon protein, putative, unclassified, expressed [Oryza sativa Japonica Group]
TCONS_00059318	up	1.9494	LOC_Os09g24850	up	2.00897	-	-	GO:0003964//RNA-directed DNA polymerase activity;GO:0003677//DNA binding;GO:0003682//chromatin binding;GO:0003723//RNA binding;GO:0004190//aspartic-type endopeptidase activity	GO:0006333//chromatin assembly or disassembly;GO:0006278//RNA-dependent DNA biosynthetic process;GO:0006508//proteolysis;GO:0006310//DNA recombination	gi|78708062|gb|ABB47037.1|/0/retrotransposon protein, putative, unclassified, expressed [Oryza sativa Japonica Group]
TCONS_00008924	up	2.83107	LOC_Os04g38680	up	2.00815	ko05033//Nicotine addiction;ko04721//Synaptic vesicle cycle;ko04727//GABAergic synapse;ko04723//Retrograde endocannabinoid signaling;ko05032//Morphine addiction	GO:0016021//integral component of membrane	GO:0015171//amino acid transmembrane transporter activity	GO:0003333//amino acid transmembrane transport	gi|38344962|emb|CAD40982.2|/0/OSJNBa0072F16.7 [Oryza sativa Japonica Group]
TCONS_00005792	up	2.63888	LOC_Os04g38680	up	2.00815	ko05033//Nicotine addiction;ko04721//Synaptic vesicle cycle;ko04727//GABAergic synapse;ko04723//Retrograde endocannabinoid signaling;ko05032//Morphine addiction	GO:0016021//integral component of membrane	GO:0015171//amino acid transmembrane transporter activity	GO:0003333//amino acid transmembrane transport	gi|38344962|emb|CAD40982.2|/0/OSJNBa0072F16.7 [Oryza sativa Japonica Group]
TCONS_00059316	up	2.2842	LOC_Os04g38680	up	2.00815	ko05033//Nicotine addiction;ko04721//Synaptic vesicle cycle;ko04727//GABAergic synapse;ko04723//Retrograde endocannabinoid signaling;ko05032//Morphine addiction	GO:0016021//integral component of membrane	GO:0015171//amino acid transmembrane transporter activity	GO:0003333//amino acid transmembrane transport	gi|38344962|emb|CAD40982.2|/0/OSJNBa0072F16.7 [Oryza sativa Japonica Group]
TCONS_00059318	up	1.9494	LOC_Os04g38680	up	2.00815	ko05033//Nicotine addiction;ko04721//Synaptic vesicle cycle;ko04727//GABAergic synapse;ko04723//Retrograde endocannabinoid signaling;ko05032//Morphine addiction	GO:0016021//integral component of membrane	GO:0015171//amino acid transmembrane transporter activity	GO:0003333//amino acid transmembrane transport	gi|38344962|emb|CAD40982.2|/0/OSJNBa0072F16.7 [Oryza sativa Japonica Group]
TCONS_00059316	up	2.2842	LOC_Os06g17070	up	2.00628	ko04978//Mineral absorption;ko03008//Ribosome biogenesis in eukaryotes;ko03018//RNA degradation	GO:0016020//membrane	GO:0046872//metal ion binding	-	gi|77551574|gb|ABA94371.1|/0/retrotransposon protein, putative, Ty1-copia subclass [Oryza sativa Japonica Group]
TCONS_00089479	up	3.07091	LOC_Os12g38670	up	1.99943	-	-	GO:0008234//cysteine-type peptidase activity	GO:0006508//proteolysis	gi|77556205|gb|ABA99001.1|/0/transposon protein, putative, CACTA, En/Spm sub-class [Oryza sativa Japonica Group]
TCONS_00065705	up	2.64989	LOC_Os12g38670	up	1.99943	-	-	GO:0008234//cysteine-type peptidase activity	GO:0006508//proteolysis	gi|77556205|gb|ABA99001.1|/0/transposon protein, putative, CACTA, En/Spm sub-class [Oryza sativa Japonica Group]
TCONS_00081336	up	7.85557	LOC_Os12g38670	up	1.99943	-	-	GO:0008234//cysteine-type peptidase activity	GO:0006508//proteolysis	gi|77556205|gb|ABA99001.1|/0/transposon protein, putative, CACTA, En/Spm sub-class [Oryza sativa Japonica Group]
TCONS_00059822	up	2.24492	LOC_Os01g37750	up	1.99871	ko00980//Metabolism of xenobiotics by cytochrome P450;ko05200//Pathways in cancer;ko00480//Glutathione metabolism;ko00982//Drug metabolism - cytochrome P450;ko05215//Prostate cancer	GO:0005737//cytoplasm	GO:0004364//glutathione transferase activity	GO:0009407//toxin catabolic process;GO:0006749//glutathione metabolic process	gi|113532863|dbj|BAF05246.1|/3.33648e-129/Os01g0558100 [Oryza sativa Japonica Group]
TCONS_00089479	up	3.07091	LOC_Os08g32160	up	1.99575	ko00904//Diterpenoid biosynthesis;ko01100//Metabolic pathways;ko01110//Biosynthesis of secondary metabolites	-	GO:0051213//dioxygenase activity;GO:0046872//metal ion binding	GO:0055114//oxidation-reduction process	gi|113623781|dbj|BAF23726.1|/0/Os08g0417000 [Oryza sativa Japonica Group]
TCONS_00065705	up	2.64989	LOC_Os08g32160	up	1.99575	ko00904//Diterpenoid biosynthesis;ko01100//Metabolic pathways;ko01110//Biosynthesis of secondary metabolites	-	GO:0051213//dioxygenase activity;GO:0046872//metal ion binding	GO:0055114//oxidation-reduction process	gi|113623781|dbj|BAF23726.1|/0/Os08g0417000 [Oryza sativa Japonica Group]
TCONS_00065705	up	2.64989	LOC_Os03g50510	up	1.99477	ko00260//Glycine, serine and threonine metabolism;ko00290//Valine, leucine and isoleucine biosynthesis;ko00270//Cysteine and methionine metabolism;ko01100//Metabolic pathways;ko01110//Biosynthesis of secondary metabolites	GO:0005737//cytoplasm	GO:0030170//pyridoxal phosphate binding;GO:0004794//L-threonine ammonia-lyase activity	GO:0009097//isoleucine biosynthetic process	gi|937911134|dbj|BAS86054.1|/0/Os03g0713000 [Oryza sativa Japonica Group]
TCONS_00010868	up	2.63376	LOC_Os02g43330	up	1.99016	-	GO:0005634//nucleus	GO:0043565//sequence-specific DNA binding;GO:0003700//transcription factor activity, sequence-specific DNA binding	GO:0006355//regulation of transcription, DNA-templated	gi|75123340|sp|Q6H6S3.1|HOX24_ORYSJ/4.09215e-156/RecName: Full=Homeobox-leucine zipper protein HOX24; AltName: Full=HD-ZIP protein HOX24; AltName: Full=Homeodomain transcription factor HOX24; AltName: Full=OsHox24
TCONS_00059316	up	2.2842	LOC_Os02g43330	up	1.99016	-	GO:0005634//nucleus	GO:0043565//sequence-specific DNA binding;GO:0003700//transcription factor activity, sequence-specific DNA binding	GO:0006355//regulation of transcription, DNA-templated	gi|75123340|sp|Q6H6S3.1|HOX24_ORYSJ/4.09215e-156/RecName: Full=Homeobox-leucine zipper protein HOX24; AltName: Full=HD-ZIP protein HOX24; AltName: Full=Homeodomain transcription factor HOX24; AltName: Full=OsHox24
TCONS_00059318	up	1.9494	LOC_Os02g43330	up	1.99016	-	GO:0005634//nucleus	GO:0043565//sequence-specific DNA binding;GO:0003700//transcription factor activity, sequence-specific DNA binding	GO:0006355//regulation of transcription, DNA-templated	gi|75123340|sp|Q6H6S3.1|HOX24_ORYSJ/4.09215e-156/RecName: Full=Homeobox-leucine zipper protein HOX24; AltName: Full=HD-ZIP protein HOX24; AltName: Full=Homeodomain transcription factor HOX24; AltName: Full=OsHox24
TCONS_00070703	up	3.1046	LOC_Os08g40680	up	1.97901	ko00500//Starch and sucrose metabolism;ko00520//Amino sugar and nucleotide sugar metabolism;ko01100//Metabolic pathways;ko01110//Biosynthesis of secondary metabolites	GO:0005576//extracellular region;GO:0016023//cytoplasmic, membrane-bounded vesicle	GO:0004568//chitinase activity;GO:0008061//chitin binding	GO:0006032//chitin catabolic process;GO:0006952//defense response;GO:0045493//xylan catabolic process	gi|1002287724|ref|XP_015648171.1|/0/PREDICTED: xylanase inhibitor protein 2-like [Oryza sativa Japonica Group]
TCONS_00059318	up	1.9494	LOC_Os01g32780	up	1.97882	-	-	-	GO:0006950//response to stress	gi|113532701|dbj|BAF05084.1|/9.3622e-88/Os01g0511100 [Oryza sativa Japonica Group]
TCONS_00008924	up	2.83107	LOC_Os01g32780	up	1.97882	-	-	-	GO:0006950//response to stress	gi|113532701|dbj|BAF05084.1|/9.3622e-88/Os01g0511100 [Oryza sativa Japonica Group]
TCONS_00091345	up	2.80973	LOC_Os01g32780	up	1.97882	-	-	-	GO:0006950//response to stress	gi|113532701|dbj|BAF05084.1|/9.3622e-88/Os01g0511100 [Oryza sativa Japonica Group]
TCONS_00005792	up	2.63888	LOC_Os01g32780	up	1.97882	-	-	-	GO:0006950//response to stress	gi|113532701|dbj|BAF05084.1|/9.3622e-88/Os01g0511100 [Oryza sativa Japonica Group]
TCONS_00010868	up	2.63376	LOC_Os01g32780	up	1.97882	-	-	-	GO:0006950//response to stress	gi|113532701|dbj|BAF05084.1|/9.3622e-88/Os01g0511100 [Oryza sativa Japonica Group]
TCONS_00056787	up	2.47695	LOC_Os01g32780	up	1.97882	-	-	-	GO:0006950//response to stress	gi|113532701|dbj|BAF05084.1|/9.3622e-88/Os01g0511100 [Oryza sativa Japonica Group]
TCONS_00059316	up	2.2842	LOC_Os01g32780	up	1.97882	-	-	-	GO:0006950//response to stress	gi|113532701|dbj|BAF05084.1|/9.3622e-88/Os01g0511100 [Oryza sativa Japonica Group]
TCONS_00059822	up	2.24492	LOC_Os01g32780	up	1.97882	-	-	-	GO:0006950//response to stress	gi|113532701|dbj|BAF05084.1|/9.3622e-88/Os01g0511100 [Oryza sativa Japonica Group]
TCONS_00081336	up	7.85557	LOC_Os11g44430	up	1.96939	ko05142//Chagas disease (American trypanosomiasis);ko05133//Pertussis;ko05145//Toxoplasmosis;ko04626//Plant-pathogen interaction;ko04722//Neurotrophin signaling pathway;ko05162//Measles;ko04620//Toll-like receptor signaling pathway;ko05164//Influenza A;ko05140//Leishmaniasis;ko05152//Tuberculosis;ko04064//NF-kappa B signaling pathway;ko04210//Apoptosis	-	GO:0005524//ATP binding;GO:0004674//protein serine/threonine kinase activity	GO:0006468//protein phosphorylation	gi|77552359|gb|ABA95156.1|/0/Protein kinase domain containing protein, expressed [Oryza sativa Japonica Group]
TCONS_00059316	up	2.2842	LOC_Os11g44430	up	1.96939	ko05142//Chagas disease (American trypanosomiasis);ko05133//Pertussis;ko05145//Toxoplasmosis;ko04626//Plant-pathogen interaction;ko04722//Neurotrophin signaling pathway;ko05162//Measles;ko04620//Toll-like receptor signaling pathway;ko05164//Influenza A;ko05140//Leishmaniasis;ko05152//Tuberculosis;ko04064//NF-kappa B signaling pathway;ko04210//Apoptosis	-	GO:0005524//ATP binding;GO:0004674//protein serine/threonine kinase activity	GO:0006468//protein phosphorylation	gi|77552359|gb|ABA95156.1|/0/Protein kinase domain containing protein, expressed [Oryza sativa Japonica Group]
TCONS_00009978	up	1.89024	LOC_Os01g71340	up	1.95523	-	GO:0046658//anchored component of plasma membrane;GO:0016023//cytoplasmic, membrane-bounded vesicle	GO:0004553//hydrolase activity, hydrolyzing O-glycosyl compounds;GO:0030247//polysaccharide binding	GO:0005975//carbohydrate metabolic process	gi|4884526|dbj|BAA77783.1|/0/beta 1,3-glucanase [Oryza sativa]
TCONS_00065705	up	2.64989	LOC_Os02g55890	up	1.95511	ko00190//Oxidative phosphorylation	GO:0016021//integral component of membrane;GO:0016023//cytoplasmic, membrane-bounded vesicle	GO:0009678//hydrogen-translocating pyrophosphatase activity;GO:0004427//inorganic diphosphatase activity	GO:0055085//transmembrane transport;GO:0015992//proton transport	gi|38488588|dbj|BAD02276.1|/0/vacuolar proton pyrophosphatase [Oryza sativa Japonica Group]
TCONS_00081336	up	7.85557	LOC_Os01g12430	up	1.95235	ko00903//Limonene and pinene degradation;ko05142//Chagas disease (American trypanosomiasis);ko05133//Pertussis;ko05145//Toxoplasmosis;ko04626//Plant-pathogen interaction;ko00642//Ethylbenzene degradation;ko00362//Benzoate degradation;ko04075//Plant hormone signal transduction;ko04722//Neurotrophin signaling pathway;ko05162//Measles;ko00240//Pyrimidine metabolism;ko00051//Fructose and mannose meta…	GO:0016021//integral component of membrane;GO:0016023//cytoplasmic, membrane-bounded vesicle;GO:0005886//plasma membrane	GO:0004674//protein serine/threonine kinase activity;GO:0005524//ATP binding	GO:0006468//protein phosphorylation;GO:0048544//recognition of pollen	gi|255673013|dbj|BAF04363.2|/0/Os01g0224000 [Oryza sativa Japonica Group]
TCONS_00089479	up	3.07091	LOC_Os01g12430	up	1.95235	ko00903//Limonene and pinene degradation;ko05142//Chagas disease (American trypanosomiasis);ko05133//Pertussis;ko05145//Toxoplasmosis;ko04626//Plant-pathogen interaction;ko00642//Ethylbenzene degradation;ko00362//Benzoate degradation;ko04075//Plant hormone signal transduction;ko04722//Neurotrophin signaling pathway;ko05162//Measles;ko00240//Pyrimidine metabolism;ko00051//Fructose and mannose meta…	GO:0016021//integral component of membrane;GO:0016023//cytoplasmic, membrane-bounded vesicle;GO:0005886//plasma membrane	GO:0004674//protein serine/threonine kinase activity;GO:0005524//ATP binding	GO:0006468//protein phosphorylation;GO:0048544//recognition of pollen	gi|255673013|dbj|BAF04363.2|/0/Os01g0224000 [Oryza sativa Japonica Group]
TCONS_00065705	up	2.64989	LOC_Os01g12430	up	1.95235	ko00903//Limonene and pinene degradation;ko05142//Chagas disease (American trypanosomiasis);ko05133//Pertussis;ko05145//Toxoplasmosis;ko04626//Plant-pathogen interaction;ko00642//Ethylbenzene degradation;ko00362//Benzoate degradation;ko04075//Plant hormone signal transduction;ko04722//Neurotrophin signaling pathway;ko05162//Measles;ko00240//Pyrimidine metabolism;ko00051//Fructose and mannose meta…	GO:0016021//integral component of membrane;GO:0016023//cytoplasmic, membrane-bounded vesicle;GO:0005886//plasma membrane	GO:0004674//protein serine/threonine kinase activity;GO:0005524//ATP binding	GO:0006468//protein phosphorylation;GO:0048544//recognition of pollen	gi|255673013|dbj|BAF04363.2|/0/Os01g0224000 [Oryza sativa Japonica Group]
TCONS_00008924	up	2.83107	LOC_Os02g37910	up	1.95011	ko00790//Folate biosynthesis;ko01120//Microbial metabolism in diverse environments;ko01100//Metabolic pathways;ko00627//Aminobenzoate degradation;ko02020//Two-component system	GO:0016021//integral component of membrane;GO:0016023//cytoplasmic, membrane-bounded vesicle	-	-	gi|50726474|dbj|BAD34083.1|/0/phosphodiesterase/alkaline phosphatase D-like protein [Oryza sativa Japonica Group]
TCONS_00091345	up	2.80973	LOC_Os02g37910	up	1.95011	ko00790//Folate biosynthesis;ko01120//Microbial metabolism in diverse environments;ko01100//Metabolic pathways;ko00627//Aminobenzoate degradation;ko02020//Two-component system	GO:0016021//integral component of membrane;GO:0016023//cytoplasmic, membrane-bounded vesicle	-	-	gi|50726474|dbj|BAD34083.1|/0/phosphodiesterase/alkaline phosphatase D-like protein [Oryza sativa Japonica Group]
TCONS_00010868	up	2.63376	LOC_Os02g37910	up	1.95011	ko00790//Folate biosynthesis;ko01120//Microbial metabolism in diverse environments;ko01100//Metabolic pathways;ko00627//Aminobenzoate degradation;ko02020//Two-component system	GO:0016021//integral component of membrane;GO:0016023//cytoplasmic, membrane-bounded vesicle	-	-	gi|50726474|dbj|BAD34083.1|/0/phosphodiesterase/alkaline phosphatase D-like protein [Oryza sativa Japonica Group]
TCONS_00056787	up	2.47695	LOC_Os02g37910	up	1.95011	ko00790//Folate biosynthesis;ko01120//Microbial metabolism in diverse environments;ko01100//Metabolic pathways;ko00627//Aminobenzoate degradation;ko02020//Two-component system	GO:0016021//integral component of membrane;GO:0016023//cytoplasmic, membrane-bounded vesicle	-	-	gi|50726474|dbj|BAD34083.1|/0/phosphodiesterase/alkaline phosphatase D-like protein [Oryza sativa Japonica Group]
TCONS_00059822	up	2.24492	LOC_Os02g37910	up	1.95011	ko00790//Folate biosynthesis;ko01120//Microbial metabolism in diverse environments;ko01100//Metabolic pathways;ko00627//Aminobenzoate degradation;ko02020//Two-component system	GO:0016021//integral component of membrane;GO:0016023//cytoplasmic, membrane-bounded vesicle	-	-	gi|50726474|dbj|BAD34083.1|/0/phosphodiesterase/alkaline phosphatase D-like protein [Oryza sativa Japonica Group]
TCONS_00059316	up	2.2842	LOC_Os02g49230	up	1.93708	ko04712//Circadian rhythm - plant	GO:0005622//intracellular	GO:0008270//zinc ion binding;GO:0003677//DNA binding	-	gi|222623584|gb|EEE57716.1|;gi|1002246501|ref|XP_015627429.1|/0;0/hypothetical protein OsJ_08199 [Oryza sativa Japonica Group];PREDICTED: zinc finger protein CONSTANS-LIKE 9 isoform X2 [Oryza sativa Japonica Group]
TCONS_00081336	up	7.85557	LOC_Os02g49230	up	1.93708	ko04712//Circadian rhythm - plant	GO:0005622//intracellular	GO:0008270//zinc ion binding;GO:0003677//DNA binding	-	gi|222623584|gb|EEE57716.1|;gi|1002246501|ref|XP_015627429.1|/0;0/hypothetical protein OsJ_08199 [Oryza sativa Japonica Group];PREDICTED: zinc finger protein CONSTANS-LIKE 9 isoform X2 [Oryza sativa Japonica Group]
TCONS_00089479	up	3.07091	LOC_Os05g07940	up	1.90824	-	-	GO:0016829//lyase activity	-	gi|113578327|dbj|BAF16690.1|;gi|937917577|dbj|BAS92495.1|/4.6764e-132;1.22357e-74/Os05g0171900 [Oryza sativa Japonica Group];Os05g0171900 [Oryza sativa Japonica Group]
TCONS_00081336	up	7.85557	LOC_Os05g07940	up	1.90824	-	-	GO:0016829//lyase activity	-	gi|113578327|dbj|BAF16690.1|;gi|937917577|dbj|BAS92495.1|/4.6764e-132;1.22357e-74/Os05g0171900 [Oryza sativa Japonica Group];Os05g0171900 [Oryza sativa Japonica Group]
TCONS_00059316	up	2.2842	LOC_Os03g12820	up	1.90794	-	-	GO:0003950//NAD+ ADP-ribosyltransferase activity	-	gi|108706982|gb|ABF94777.1|/0/Poly polymerase catalytic domain containing protein, expressed [Oryza sativa Japonica Group]
TCONS_00081336	up	7.85557	LOC_Os03g12820	up	1.90794	-	-	GO:0003950//NAD+ ADP-ribosyltransferase activity	-	gi|108706982|gb|ABF94777.1|/0/Poly polymerase catalytic domain containing protein, expressed [Oryza sativa Japonica Group]
TCONS_00081336	up	7.85557	LOC_Os02g17400	up	1.90635	ko04626//Plant-pathogen interaction	GO:0016021//integral component of membrane;GO:0016023//cytoplasmic, membrane-bounded vesicle	-	-	gi|1002242802|ref|XP_015625623.1|/0/PREDICTED: probable LRR receptor-like serine/threonine-protein kinase At4g36180 [Oryza sativa Japonica Group]
TCONS_00070703	up	3.1046	LOC_Os05g42330	up	1.90592	-	GO:0005886//plasma membrane;GO:0030658//transport vesicle membrane;GO:0016021//integral component of membrane	-	GO:0015031//protein transport	gi|75113853|sp|Q60EA5.1|SCAM3_ORYSJ/2.81629e-178/RecName: Full=Secretory carrier-associated membrane protein 3; Short=Secretory carrier membrane protein 3
TCONS_00056787	up	2.47695	LOC_Os07g46990	up	1.90393	ko04146//Peroxisome;ko05016//Huntington's disease;ko05020//Prion diseases;ko05014//Amyotrophic lateral sclerosis (ALS)	GO:0005737//cytoplasm	GO:0046872//metal ion binding;GO:0004784//superoxide dismutase activity	GO:0019430//removal of superoxide radicals;GO:0055114//oxidation-reduction process	gi|937928181|dbj|BAT03098.1|/6.92953e-105/Os07g0665200, partial [Oryza sativa Japonica Group]
TCONS_00009978	up	1.89024	LOC_Os03g62230	up	1.90378	-	-	-	-	gi|255675036|dbj|BAH92434.1|/0/Os03g0838800 [Oryza sativa Japonica Group]
TCONS_00089479	up	3.07091	LOC_Os06g49350	up	1.90318	ko00230//Purine metabolism;ko05166//HTLV-I infection;ko04623//Cytosolic DNA-sensing pathway;ko04115//p53 signaling pathway;ko05016//Huntington's disease;ko00900//Terpenoid backbone biosynthesis;ko05169//Epstein-Barr virus infection;ko00240//Pyrimidine metabolism;ko04110//Cell cycle;ko00908//Zeatin biosynthesis;ko05202//Transcriptional misregulation in cancer;ko01100//Metabolic pathways;ko03008//R…	-	GO:0008270//zinc ion binding;GO:0003676//nucleic acid binding	GO:0015074//DNA integration	gi|77553001|gb|ABA95797.1|/0/retrotransposon protein, putative, unclassified [Oryza sativa Japonica Group]
TCONS_00065705	up	2.64989	LOC_Os06g49350	up	1.90318	ko00230//Purine metabolism;ko05166//HTLV-I infection;ko04623//Cytosolic DNA-sensing pathway;ko04115//p53 signaling pathway;ko05016//Huntington's disease;ko00900//Terpenoid backbone biosynthesis;ko05169//Epstein-Barr virus infection;ko00240//Pyrimidine metabolism;ko04110//Cell cycle;ko00908//Zeatin biosynthesis;ko05202//Transcriptional misregulation in cancer;ko01100//Metabolic pathways;ko03008//R…	-	GO:0008270//zinc ion binding;GO:0003676//nucleic acid binding	GO:0015074//DNA integration	gi|77553001|gb|ABA95797.1|/0/retrotransposon protein, putative, unclassified [Oryza sativa Japonica Group]
TCONS_00056787	up	2.47695	LOC_Os09g26660	up	1.901	ko04626//Plant-pathogen interaction	GO:0016021//integral component of membrane	GO:0050664//oxidoreductase activity, acting on NAD(P)H, oxygen as acceptor;GO:0004601//peroxidase activity;GO:0005509//calcium ion binding	GO:0098869//cellular oxidant detoxification;GO:0055114//oxidation-reduction process	gi|113631500|dbj|BAF25181.1|/0/Os09g0438000 [Oryza sativa Japonica Group]
TCONS_00089479	up	3.07091	LOC_Os06g42380	up	1.90047	ko03013//RNA transport;ko03008//Ribosome biogenesis in eukaryotes;ko03018//RNA degradation	-	-	-	gi|222635925|gb|EEE66057.1|/0/hypothetical protein OsJ_22054 [Oryza sativa Japonica Group]
TCONS_00065705	up	2.64989	LOC_Os06g42380	up	1.90047	ko03013//RNA transport;ko03008//Ribosome biogenesis in eukaryotes;ko03018//RNA degradation	-	-	-	gi|222635925|gb|EEE66057.1|/0/hypothetical protein OsJ_22054 [Oryza sativa Japonica Group]
TCONS_00070703	up	3.1046	LOC_Os02g17750	up	1.89949	-	-	GO:0003677//DNA binding;GO:0008234//cysteine-type peptidase activity	GO:0006508//proteolysis	gi|53749409|gb|AAU90267.1|/0/Transposase family protein [Oryza sativa Japonica Group]
TCONS_00089479	up	3.07091	LOC_Os02g48870	up	1.89839	ko00903//Limonene and pinene degradation;ko00642//Ethylbenzene degradation;ko00362//Benzoate degradation;ko00240//Pyrimidine metabolism;ko00051//Fructose and mannose metabolism;ko01120//Microbial metabolism in diverse environments;ko01100//Metabolic pathways;ko00627//Aminobenzoate degradation;ko00350//Tyrosine metabolism	GO:0016023//cytoplasmic, membrane-bounded vesicle	GO:0004190//aspartic-type endopeptidase activity	GO:0030163//protein catabolic process;GO:0006508//proteolysis	gi|113537485|dbj|BAF09868.1|/0/Os02g0720600 [Oryza sativa Japonica Group]
TCONS_00065705	up	2.64989	LOC_Os02g48870	up	1.89839	ko00903//Limonene and pinene degradation;ko00642//Ethylbenzene degradation;ko00362//Benzoate degradation;ko00240//Pyrimidine metabolism;ko00051//Fructose and mannose metabolism;ko01120//Microbial metabolism in diverse environments;ko01100//Metabolic pathways;ko00627//Aminobenzoate degradation;ko00350//Tyrosine metabolism	GO:0016023//cytoplasmic, membrane-bounded vesicle	GO:0004190//aspartic-type endopeptidase activity	GO:0030163//protein catabolic process;GO:0006508//proteolysis	gi|113537485|dbj|BAF09868.1|/0/Os02g0720600 [Oryza sativa Japonica Group]
TCONS_00010868	up	2.63376	LOC_Os01g04330	up	1.8957	ko04626//Plant-pathogen interaction	-	GO:0005509//calcium ion binding	-	gi|75322067|sp|Q5ZCK5.1|CML16_ORYSJ/6.24251e-118/RecName: Full=Probable calcium-binding protein CML16; AltName: Full=Calmodulin-like protein 16
TCONS_00059316	up	2.2842	LOC_Os01g04330	up	1.8957	ko04626//Plant-pathogen interaction	-	GO:0005509//calcium ion binding	-	gi|75322067|sp|Q5ZCK5.1|CML16_ORYSJ/6.24251e-118/RecName: Full=Probable calcium-binding protein CML16; AltName: Full=Calmodulin-like protein 16
TCONS_00008924	up	2.83107	LOC_Os07g48170	up	1.88943	-	GO:0009536//plastid	-	-	gi|1002284950|ref|XP_015646775.1|/0/PREDICTED: uncharacterized protein LOC4344291 [Oryza sativa Japonica Group]
TCONS_00091345	up	2.80973	LOC_Os07g48170	up	1.88943	-	GO:0009536//plastid	-	-	gi|1002284950|ref|XP_015646775.1|/0/PREDICTED: uncharacterized protein LOC4344291 [Oryza sativa Japonica Group]
TCONS_00005792	up	2.63888	LOC_Os07g48170	up	1.88943	-	GO:0009536//plastid	-	-	gi|1002284950|ref|XP_015646775.1|/0/PREDICTED: uncharacterized protein LOC4344291 [Oryza sativa Japonica Group]
TCONS_00056787	up	2.47695	LOC_Os07g48170	up	1.88943	-	GO:0009536//plastid	-	-	gi|1002284950|ref|XP_015646775.1|/0/PREDICTED: uncharacterized protein LOC4344291 [Oryza sativa Japonica Group]
TCONS_00059822	up	2.24492	LOC_Os07g48170	up	1.88943	-	GO:0009536//plastid	-	-	gi|1002284950|ref|XP_015646775.1|/0/PREDICTED: uncharacterized protein LOC4344291 [Oryza sativa Japonica Group]
TCONS_00065705	up	2.64989	LOC_Os01g04580	up	1.88469	ko05142//Chagas disease (American trypanosomiasis);ko05133//Pertussis;ko05145//Toxoplasmosis;ko04626//Plant-pathogen interaction;ko04075//Plant hormone signal transduction;ko04722//Neurotrophin signaling pathway;ko05162//Measles;ko04620//Toll-like receptor signaling pathway;ko05164//Influenza A;ko05140//Leishmaniasis;ko05152//Tuberculosis;ko04064//NF-kappa B signaling pathway;ko04210//Apoptosis	GO:0016021//integral component of membrane	GO:0030247//polysaccharide binding;GO:0005524//ATP binding;GO:0004674//protein serine/threonine kinase activity	GO:0006468//protein phosphorylation	gi|113531501|dbj|BAF03884.1|/0/Os01g0138400 [Oryza sativa Japonica Group]
TCONS_00008924	up	2.83107	LOC_Os05g30980	up	1.86086	-	GO:0019013//viral nucleocapsid;GO:0030529//intracellular ribonucleoprotein complex	GO:0003723//RNA binding;GO:0000166//nucleotide binding	-	gi|255676313|dbj|BAF17281.2|;gi|937918792|dbj|BAS93710.1|/0;0/Os05g0373400 [Oryza sativa Japonica Group];Os05g0373400 [Oryza sativa Japonica Group]
TCONS_00091345	up	2.80973	LOC_Os05g30980	up	1.86086	-	GO:0019013//viral nucleocapsid;GO:0030529//intracellular ribonucleoprotein complex	GO:0003723//RNA binding;GO:0000166//nucleotide binding	-	gi|255676313|dbj|BAF17281.2|;gi|937918792|dbj|BAS93710.1|/0;0/Os05g0373400 [Oryza sativa Japonica Group];Os05g0373400 [Oryza sativa Japonica Group]
TCONS_00005792	up	2.63888	LOC_Os05g30980	up	1.86086	-	GO:0019013//viral nucleocapsid;GO:0030529//intracellular ribonucleoprotein complex	GO:0003723//RNA binding;GO:0000166//nucleotide binding	-	gi|255676313|dbj|BAF17281.2|;gi|937918792|dbj|BAS93710.1|/0;0/Os05g0373400 [Oryza sativa Japonica Group];Os05g0373400 [Oryza sativa Japonica Group]
TCONS_00010868	up	2.63376	LOC_Os05g30980	up	1.86086	-	GO:0019013//viral nucleocapsid;GO:0030529//intracellular ribonucleoprotein complex	GO:0003723//RNA binding;GO:0000166//nucleotide binding	-	gi|255676313|dbj|BAF17281.2|;gi|937918792|dbj|BAS93710.1|/0;0/Os05g0373400 [Oryza sativa Japonica Group];Os05g0373400 [Oryza sativa Japonica Group]
TCONS_00056787	up	2.47695	LOC_Os05g30980	up	1.86086	-	GO:0019013//viral nucleocapsid;GO:0030529//intracellular ribonucleoprotein complex	GO:0003723//RNA binding;GO:0000166//nucleotide binding	-	gi|255676313|dbj|BAF17281.2|;gi|937918792|dbj|BAS93710.1|/0;0/Os05g0373400 [Oryza sativa Japonica Group];Os05g0373400 [Oryza sativa Japonica Group]
TCONS_00059822	up	2.24492	LOC_Os05g30980	up	1.86086	-	GO:0019013//viral nucleocapsid;GO:0030529//intracellular ribonucleoprotein complex	GO:0003723//RNA binding;GO:0000166//nucleotide binding	-	gi|255676313|dbj|BAF17281.2|;gi|937918792|dbj|BAS93710.1|/0;0/Os05g0373400 [Oryza sativa Japonica Group];Os05g0373400 [Oryza sativa Japonica Group]
TCONS_00056787	up	2.47695	LOC_Os05g13940	up	1.86004	-	-	-	-	-
TCONS_00059822	up	2.24492	LOC_Os05g13940	up	1.86004	-	-	-	-	-
TCONS_00065705	up	2.64989	LOC_Os03g32420	up	1.84453	-	-	-	-	gi|108709035|gb|ABF96830.1|/1.54211e-118/expressed protein [Oryza sativa Japonica Group]
TCONS_00008924	up	2.83107	LOC_Os04g47700	up	1.84128	-	-	-	-	gi|38345401|emb|CAE03092.2|/0/OSJNBa0017B10.7 [Oryza sativa Japonica Group]
TCONS_00091345	up	2.80973	LOC_Os04g47700	up	1.84128	-	-	-	-	gi|38345401|emb|CAE03092.2|/0/OSJNBa0017B10.7 [Oryza sativa Japonica Group]
TCONS_00005792	up	2.63888	LOC_Os04g47700	up	1.84128	-	-	-	-	gi|38345401|emb|CAE03092.2|/0/OSJNBa0017B10.7 [Oryza sativa Japonica Group]
TCONS_00010868	up	2.63376	LOC_Os04g47700	up	1.84128	-	-	-	-	gi|38345401|emb|CAE03092.2|/0/OSJNBa0017B10.7 [Oryza sativa Japonica Group]
TCONS_00056787	up	2.47695	LOC_Os04g47700	up	1.84128	-	-	-	-	gi|38345401|emb|CAE03092.2|/0/OSJNBa0017B10.7 [Oryza sativa Japonica Group]
TCONS_00059316	up	2.2842	LOC_Os04g47700	up	1.84128	-	-	-	-	gi|38345401|emb|CAE03092.2|/0/OSJNBa0017B10.7 [Oryza sativa Japonica Group]
TCONS_00059822	up	2.24492	LOC_Os04g47700	up	1.84128	-	-	-	-	gi|38345401|emb|CAE03092.2|/0/OSJNBa0017B10.7 [Oryza sativa Japonica Group]
TCONS_00059318	up	1.9494	LOC_Os04g47700	up	1.84128	-	-	-	-	gi|38345401|emb|CAE03092.2|/0/OSJNBa0017B10.7 [Oryza sativa Japonica Group]
TCONS_00070703	up	3.1046	LOC_Os05g40010	up	1.83203	-	GO:0016023//cytoplasmic, membrane-bounded vesicle	GO:0008289//lipid binding	GO:0006869//lipid transport	gi|255676445|dbj|BAF17758.2|/2.81675e-54/Os05g0477900 [Oryza sativa Japonica Group]
TCONS_00009978	up	1.89024	LOC_Os07g03060	up	1.83135	-	-	-	-	gi|113610328|dbj|BAF20706.1|/0/Os07g0122300 [Oryza sativa Japonica Group]
TCONS_00011723	up	1.58332	LOC_Os02g14900	up	1.82081	-	-	-	-	gi|1002245567|ref|XP_015626965.1|/0/PREDICTED: putative callose synthase 8 isoform X4 [Oryza sativa Japonica Group]
TCONS_00081336	up	7.85557	LOC_Os07g16400	up	1.81378	ko03440//Homologous recombination;ko00240//Pyrimidine metabolism;ko01100//Metabolic pathways;ko03460//Fanconi anemia pathway;ko02020//Two-component system;ko02010//ABC transporters;ko00670//One carbon pool by folate	-	GO:0003964//RNA-directed DNA polymerase activity;GO:0003677//DNA binding;GO:0003723//RNA binding;GO:0004190//aspartic-type endopeptidase activity;GO:0008270//zinc ion binding	GO:0006278//RNA-dependent DNA biosynthetic process;GO:0006508//proteolysis;GO:0015074//DNA integration;GO:0006310//DNA recombination	gi|108862586|gb|ABG22001.1|/0/retrotransposon protein, putative, Ty3-gypsy subclass [Oryza sativa Japonica Group]
TCONS_00056787	up	2.47695	LOC_Os08g43334	up	1.80403	-	-	GO:0003677//DNA binding	GO:0006351//transcription, DNA-templated	gi|33591098|gb|AAQ23056.1|;gi|75225495|sp|Q6Z9C8.1|HFB2B_ORYSJ/0;0/heat shock factor RHSF2 [Oryza sativa Japonica Group];RecName: Full=Heat stress transcription factor B-2b; AltName: Full=Heat stress transcription factor 2; Short=rHsf2; AltName: Full=Heat stress transcription factor 21; Short=OsHsf-21
TCONS_00070703	up	3.1046	LOC_Os04g57720	up	1.80226	ko04075//Plant hormone signal transduction	GO:0005622//intracellular	-	GO:0000160//phosphorelay signal transduction system;GO:0009736//cytokinin-activated signaling pathway;GO:0006355//regulation of transcription, DNA-templated	gi|75296424|sp|Q7XQA6.1|ORR6_ORYSJ/2.28187e-87/RecName: Full=Two-component response regulator ORR6; AltName: Full=OsRR6; AltName: Full=OsRRA6
TCONS_00070703	up	3.1046	LOC_Os04g55220	up	1.80185	-	GO:0016021//integral component of membrane;GO:0009506//plasmodesma;GO:0005783//endoplasmic reticulum;GO:0005886//plasma membrane	GO:0008289//lipid binding	-	gi|32487348|emb|CAE03170.1|/0/OSJNBa0070O11.1 [Oryza sativa Japonica Group]
TCONS_00056787	up	2.47695	LOC_Os02g32970	up	1.80147	-	-	GO:0016787//hydrolase activity	-	gi|50251390|dbj|BAD28417.1|/0/hydrolase, alpha/beta fold protein-like [Oryza sativa Japonica Group]
TCONS_00059822	up	2.24492	LOC_Os02g32970	up	1.80147	-	-	GO:0016787//hydrolase activity	-	gi|50251390|dbj|BAD28417.1|/0/hydrolase, alpha/beta fold protein-like [Oryza sativa Japonica Group]
TCONS_00059316	up	2.2842	LOC_Os05g49900	up	1.80028	ko01110//Biosynthesis of secondary metabolites;ko00062//Fatty acid elongation	GO:0016021//integral component of membrane	GO:0016747//transferase activity, transferring acyl groups other than amino-acyl groups	GO:0006633//fatty acid biosynthetic process	gi|113579942|dbj|BAF18305.1|/0/Os05g0574600 [Oryza sativa Japonica Group]
TCONS_00089479	up	3.07091	LOC_Os12g36110	up	1.79675	ko04916//Melanogenesis;ko04020//Calcium signaling pathway;ko04270//Vascular smooth muscle contraction;ko05133//Pertussis;ko04744//Phototransduction;ko04626//Plant-pathogen interaction;ko04910//Insulin signaling pathway;ko04970//Salivary secretion;ko04912//GnRH signaling pathway;ko04722//Neurotrophin signaling pathway;ko05034//Alcoholism;ko05031//Amphetamine addiction;ko04745//Phototransduction - …	-	GO:0005516//calmodulin binding	GO:0006950//response to stress	gi|1002314498|ref|XP_015620621.1|/0/PREDICTED: calmodulin-binding protein 60 D isoform X2 [Oryza sativa Japonica Group]
TCONS_00065705	up	2.64989	LOC_Os12g36110	up	1.79675	ko04916//Melanogenesis;ko04020//Calcium signaling pathway;ko04270//Vascular smooth muscle contraction;ko05133//Pertussis;ko04744//Phototransduction;ko04626//Plant-pathogen interaction;ko04910//Insulin signaling pathway;ko04970//Salivary secretion;ko04912//GnRH signaling pathway;ko04722//Neurotrophin signaling pathway;ko05034//Alcoholism;ko05031//Amphetamine addiction;ko04745//Phototransduction - …	-	GO:0005516//calmodulin binding	GO:0006950//response to stress	gi|1002314498|ref|XP_015620621.1|/0/PREDICTED: calmodulin-binding protein 60 D isoform X2 [Oryza sativa Japonica Group]
TCONS_00008924	up	2.83107	LOC_Os01g49710	up	1.79444	ko00980//Metabolism of xenobiotics by cytochrome P450;ko05200//Pathways in cancer;ko00480//Glutathione metabolism;ko00982//Drug metabolism - cytochrome P450;ko05215//Prostate cancer	GO:0005739//mitochondrion	GO:0016740//transferase activity	GO:0044237//cellular metabolic process	gi|1002227395|ref|XP_015631774.1|/3.85215e-119/PREDICTED: probable glutathione S-transferase GSTU6 [Oryza sativa Japonica Group]
TCONS_00091345	up	2.80973	LOC_Os01g49710	up	1.79444	ko00980//Metabolism of xenobiotics by cytochrome P450;ko05200//Pathways in cancer;ko00480//Glutathione metabolism;ko00982//Drug metabolism - cytochrome P450;ko05215//Prostate cancer	GO:0005739//mitochondrion	GO:0016740//transferase activity	GO:0044237//cellular metabolic process	gi|1002227395|ref|XP_015631774.1|/3.85215e-119/PREDICTED: probable glutathione S-transferase GSTU6 [Oryza sativa Japonica Group]
TCONS_00005792	up	2.63888	LOC_Os01g49710	up	1.79444	ko00980//Metabolism of xenobiotics by cytochrome P450;ko05200//Pathways in cancer;ko00480//Glutathione metabolism;ko00982//Drug metabolism - cytochrome P450;ko05215//Prostate cancer	GO:0005739//mitochondrion	GO:0016740//transferase activity	GO:0044237//cellular metabolic process	gi|1002227395|ref|XP_015631774.1|/3.85215e-119/PREDICTED: probable glutathione S-transferase GSTU6 [Oryza sativa Japonica Group]
TCONS_00010868	up	2.63376	LOC_Os01g49710	up	1.79444	ko00980//Metabolism of xenobiotics by cytochrome P450;ko05200//Pathways in cancer;ko00480//Glutathione metabolism;ko00982//Drug metabolism - cytochrome P450;ko05215//Prostate cancer	GO:0005739//mitochondrion	GO:0016740//transferase activity	GO:0044237//cellular metabolic process	gi|1002227395|ref|XP_015631774.1|/3.85215e-119/PREDICTED: probable glutathione S-transferase GSTU6 [Oryza sativa Japonica Group]
TCONS_00056787	up	2.47695	LOC_Os01g49710	up	1.79444	ko00980//Metabolism of xenobiotics by cytochrome P450;ko05200//Pathways in cancer;ko00480//Glutathione metabolism;ko00982//Drug metabolism - cytochrome P450;ko05215//Prostate cancer	GO:0005739//mitochondrion	GO:0016740//transferase activity	GO:0044237//cellular metabolic process	gi|1002227395|ref|XP_015631774.1|/3.85215e-119/PREDICTED: probable glutathione S-transferase GSTU6 [Oryza sativa Japonica Group]
TCONS_00059316	up	2.2842	LOC_Os01g49710	up	1.79444	ko00980//Metabolism of xenobiotics by cytochrome P450;ko05200//Pathways in cancer;ko00480//Glutathione metabolism;ko00982//Drug metabolism - cytochrome P450;ko05215//Prostate cancer	GO:0005739//mitochondrion	GO:0016740//transferase activity	GO:0044237//cellular metabolic process	gi|1002227395|ref|XP_015631774.1|/3.85215e-119/PREDICTED: probable glutathione S-transferase GSTU6 [Oryza sativa Japonica Group]
TCONS_00059822	up	2.24492	LOC_Os01g49710	up	1.79444	ko00980//Metabolism of xenobiotics by cytochrome P450;ko05200//Pathways in cancer;ko00480//Glutathione metabolism;ko00982//Drug metabolism - cytochrome P450;ko05215//Prostate cancer	GO:0005739//mitochondrion	GO:0016740//transferase activity	GO:0044237//cellular metabolic process	gi|1002227395|ref|XP_015631774.1|/3.85215e-119/PREDICTED: probable glutathione S-transferase GSTU6 [Oryza sativa Japonica Group]
TCONS_00070703	up	3.1046	LOC_Os06g28124	up	1.79391	-	GO:0016021//integral component of membrane	GO:0016757//transferase activity, transferring glycosyl groups	-	gi|113595675|dbj|BAF19549.1|/0/Os06g0475400 [Oryza sativa Japonica Group]
TCONS_00059318	up	1.9494	LOC_Os08g44390	up	1.78933	ko04626//Plant-pathogen interaction	GO:0005737//cytoplasm	GO:0004198//calcium-dependent cysteine-type endopeptidase activity;GO:0005509//calcium ion binding	GO:0006508//proteolysis	gi|113624460|dbj|BAF24405.1|/3.04726e-115/Os08g0558100 [Oryza sativa Japonica Group]
TCONS_00059316	up	2.2842	LOC_Os08g44390	up	1.78933	ko04626//Plant-pathogen interaction	GO:0005737//cytoplasm	GO:0004198//calcium-dependent cysteine-type endopeptidase activity;GO:0005509//calcium ion binding	GO:0006508//proteolysis	gi|113624460|dbj|BAF24405.1|/3.04726e-115/Os08g0558100 [Oryza sativa Japonica Group]
TCONS_00070703	up	3.1046	LOC_Os03g57450	up	1.78825	ko05145//Toxoplasmosis;ko04626//Plant-pathogen interaction	GO:0005737//cytoplasm;GO:0005634//nucleus;GO:0005886//plasma membrane	GO:0005516//calmodulin binding;GO:0005509//calcium ion binding;GO:0009931//calcium-dependent protein serine/threonine kinase activity;GO:0005524//ATP binding;GO:0004683//calmodulin-dependent protein kinase activity	GO:0018105//peptidyl-serine phosphorylation;GO:0046777//protein autophosphorylation;GO:0035556//intracellular signal transduction;GO:0009738//abscisic acid-activated signaling pathway	gi|113549974|dbj|BAF13417.1|/0/Os03g0788500 [Oryza sativa Japonica Group]
TCONS_00091345	up	2.80973	LOC_Os04g51660	up	1.78613	ko00941//Flavonoid biosynthesis;ko00073//Cutin, suberine and wax biosynthesis;ko00940//Phenylpropanoid biosynthesis;ko00330//Arginine and proline metabolism;ko00945//Stilbenoid, diarylheptanoid and gingerol biosynthesis;ko01110//Biosynthesis of secondary metabolites	GO:0005739//mitochondrion	GO:0016747//transferase activity, transferring acyl groups other than amino-acyl groups	-	gi|38346544|emb|CAE02125.2|/0/OSJNBa0035M09.5 [Oryza sativa Japonica Group]
TCONS_00056787	up	2.47695	LOC_Os04g51660	up	1.78613	ko00941//Flavonoid biosynthesis;ko00073//Cutin, suberine and wax biosynthesis;ko00940//Phenylpropanoid biosynthesis;ko00330//Arginine and proline metabolism;ko00945//Stilbenoid, diarylheptanoid and gingerol biosynthesis;ko01110//Biosynthesis of secondary metabolites	GO:0005739//mitochondrion	GO:0016747//transferase activity, transferring acyl groups other than amino-acyl groups	-	gi|38346544|emb|CAE02125.2|/0/OSJNBa0035M09.5 [Oryza sativa Japonica Group]
TCONS_00059822	up	2.24492	LOC_Os04g51660	up	1.78613	ko00941//Flavonoid biosynthesis;ko00073//Cutin, suberine and wax biosynthesis;ko00940//Phenylpropanoid biosynthesis;ko00330//Arginine and proline metabolism;ko00945//Stilbenoid, diarylheptanoid and gingerol biosynthesis;ko01110//Biosynthesis of secondary metabolites	GO:0005739//mitochondrion	GO:0016747//transferase activity, transferring acyl groups other than amino-acyl groups	-	gi|38346544|emb|CAE02125.2|/0/OSJNBa0035M09.5 [Oryza sativa Japonica Group]
TCONS_00056787	up	2.47695	LOC_Os01g50100	up	1.78337	ko04976//Bile secretion;ko02010//ABC transporters	GO:0016021//integral component of membrane	GO:0042626//ATPase activity, coupled to transmembrane movement of substances;GO:0005524//ATP binding	GO:0055085//transmembrane transport	gi|674884486|emb|CDY48003.1|/0/BnaA04g26870D [Brassica napus]
TCONS_00059316	up	2.2842	LOC_Os01g02900	up	1.77616	-	GO:0016021//integral component of membrane;GO:0005739//mitochondrion	GO:0016757//transferase activity, transferring glycosyl groups	-	gi|218187403|gb|EEC69830.1|/0/hypothetical protein OsI_00151 [Oryza sativa Indica Group]
TCONS_00011723	up	1.58332	LOC_Os01g71760	up	1.77484	-	GO:0005887//integral component of plasma membrane	GO:0015185//gamma-aminobutyric acid transmembrane transporter activity;GO:0015189//L-lysine transmembrane transporter activity;GO:0015180//L-alanine transmembrane transporter activity;GO:0015181//arginine transmembrane transporter activity;GO:0005313//L-glutamate transmembrane transporter activity;GO:0015297//antiporter activity	GO:1903401//L-lysine transmembrane transport;GO:0015812//gamma-aminobutyric acid transport;GO:0089711//L-glutamate transmembrane transport;GO:0015808//L-alanine transport;GO:1903826//arginine transmembrane transport	gi|1002229077|ref|XP_015641827.1|/0/PREDICTED: amino-acid permease BAT1 homolog [Oryza sativa Japonica Group]
TCONS_00056787	up	2.47695	LOC_Os06g45710	up	1.76228	ko00710//Carbon fixation in photosynthetic organisms;ko01120//Microbial metabolism in diverse environments;ko01100//Metabolic pathways;ko01110//Biosynthesis of secondary metabolites;ko00010//Glycolysis / Gluconeogenesis	GO:0005829//cytosol;GO:0009506//plasmodesma;GO:0005774//vacuolar membrane;GO:0009570//chloroplast stroma;GO:0005634//nucleus;GO:0005886//plasma membrane;GO:0048046//apoplast	GO:0004618//phosphoglycerate kinase activity;GO:0005524//ATP binding	GO:0006096//glycolytic process	gi|113596357|dbj|BAF20231.1|/0/Os06g0668200 [Oryza sativa Japonica Group]
TCONS_00009978	up	1.89024	LOC_Os05g05680	up	1.7595	ko00270//Cysteine and methionine metabolism;ko01100//Metabolic pathways;ko01110//Biosynthesis of secondary metabolites	-	GO:0046872//metal ion binding;GO:0051213//dioxygenase activity	GO:0055114//oxidation-reduction process;GO:0009693//ethylene biosynthetic process	gi|113578208|dbj|BAF16571.1|/0/Os05g0149400 [Oryza sativa Japonica Group]
TCONS_00056787	up	2.47695	LOC_Os09g39620	up	1.75892	ko00903//Limonene and pinene degradation;ko05142//Chagas disease (American trypanosomiasis);ko05133//Pertussis;ko05145//Toxoplasmosis;ko00642//Ethylbenzene degradation;ko00362//Benzoate degradation;ko04722//Neurotrophin signaling pathway;ko05162//Measles;ko00240//Pyrimidine metabolism;ko00051//Fructose and mannose metabolism;ko04620//Toll-like receptor signaling pathway;ko05164//Influenza A;ko011…	-	GO:0004842//ubiquitin-protein transferase activity;GO:0004672//protein kinase activity;GO:0005524//ATP binding	GO:0006950//response to stress;GO:0016567//protein ubiquitination;GO:0006468//protein phosphorylation	gi|113632213|dbj|BAF25894.1|/0/Os09g0569800 [Oryza sativa Japonica Group]
TCONS_00089479	up	3.07091	LOC_Os10g17940	up	1.75629	-	GO:0019005//SCF ubiquitin ligase complex	GO:0004842//ubiquitin-protein transferase activity	GO:0031146//SCF-dependent proteasomal ubiquitin-dependent protein catabolic process	gi|31431168|gb|AAP52983.1|/0/F-box domain containing protein [Oryza sativa Japonica Group]
TCONS_00065705	up	2.64989	LOC_Os10g17940	up	1.75629	-	GO:0019005//SCF ubiquitin ligase complex	GO:0004842//ubiquitin-protein transferase activity	GO:0031146//SCF-dependent proteasomal ubiquitin-dependent protein catabolic process	gi|31431168|gb|AAP52983.1|/0/F-box domain containing protein [Oryza sativa Japonica Group]
TCONS_00089479	up	3.07091	LOC_Os07g41230	up	1.75589	ko00860//Porphyrin and chlorophyll metabolism;ko01110//Biosynthesis of secondary metabolites;ko00901//Indole alkaloid biosynthesis	GO:0009536//plastid	GO:0050529	-	gi|1002281433|ref|XP_015645017.1|/0/PREDICTED: putative methylesterase 11, chloroplastic [Oryza sativa Japonica Group]
TCONS_00065705	up	2.64989	LOC_Os07g41230	up	1.75589	ko00860//Porphyrin and chlorophyll metabolism;ko01110//Biosynthesis of secondary metabolites;ko00901//Indole alkaloid biosynthesis	GO:0009536//plastid	GO:0050529	-	gi|1002281433|ref|XP_015645017.1|/0/PREDICTED: putative methylesterase 11, chloroplastic [Oryza sativa Japonica Group]
TCONS_00056787	up	2.47695	LOC_Os01g06660	up	1.7528	ko01100//Metabolic pathways;ko00380//Tryptophan metabolism;ko01110//Biosynthesis of secondary metabolites;ko00010//Glycolysis / Gluconeogenesis	-	GO:0000287//magnesium ion binding;GO:0030976//thiamine pyrophosphate binding;GO:0004737//pyruvate decarboxylase activity	-	gi|113531619|dbj|BAF04002.1|/0/Os01g0160100 [Oryza sativa Japonica Group]
TCONS_00059316	up	2.2842	LOC_Os03g62430	up	1.74237	ko05142//Chagas disease (American trypanosomiasis);ko05133//Pertussis;ko05145//Toxoplasmosis;ko04722//Neurotrophin signaling pathway;ko05162//Measles;ko04620//Toll-like receptor signaling pathway;ko05164//Influenza A;ko05140//Leishmaniasis;ko05152//Tuberculosis;ko04064//NF-kappa B signaling pathway;ko04210//Apoptosis	GO:0016021//integral component of membrane;GO:0016023//cytoplasmic, membrane-bounded vesicle;GO:0005886//plasma membrane	GO:0004674//protein serine/threonine kinase activity;GO:0005509//calcium ion binding;GO:0030247//polysaccharide binding;GO:0005524//ATP binding	GO:0006468//protein phosphorylation;GO:0007166//cell surface receptor signaling pathway	gi|108712014|gb|ABF99809.1|/0/Calcium binding EGF domain containing protein, expressed [Oryza sativa Japonica Group]
TCONS_00089479	up	3.07091	LOC_Os05g05630	up	1.73365	ko05166//HTLV-I infection;ko04115//p53 signaling pathway;ko04110//Cell cycle;ko00908//Zeatin biosynthesis;ko05202//Transcriptional misregulation in cancer;ko01100//Metabolic pathways;ko03008//Ribosome biogenesis in eukaryotes;ko04064//NF-kappa B signaling pathway;ko01110//Biosynthesis of secondary metabolites;ko04210//Apoptosis;ko03018//RNA degradation	-	GO:0003676//nucleic acid binding;GO:0008270//zinc ion binding	GO:0015074//DNA integration	gi|77556955|gb|ABA99751.1|/0/retrotransposon protein, putative, Ty1-copia subclass [Oryza sativa Japonica Group]
TCONS_00065705	up	2.64989	LOC_Os05g05630	up	1.73365	ko05166//HTLV-I infection;ko04115//p53 signaling pathway;ko04110//Cell cycle;ko00908//Zeatin biosynthesis;ko05202//Transcriptional misregulation in cancer;ko01100//Metabolic pathways;ko03008//Ribosome biogenesis in eukaryotes;ko04064//NF-kappa B signaling pathway;ko01110//Biosynthesis of secondary metabolites;ko04210//Apoptosis;ko03018//RNA degradation	-	GO:0003676//nucleic acid binding;GO:0008270//zinc ion binding	GO:0015074//DNA integration	gi|77556955|gb|ABA99751.1|/0/retrotransposon protein, putative, Ty1-copia subclass [Oryza sativa Japonica Group]
TCONS_00059316	up	2.2842	LOC_Os09g34230	up	1.73217	-	GO:0043231//intracellular membrane-bounded organelle	GO:0080043//quercetin 3-O-glucosyltransferase activity;GO:0080044//quercetin 7-O-glucosyltransferase activity	GO:0009813//flavonoid biosynthetic process;GO:0052696//flavonoid glucuronidation	gi|1002294723|ref|XP_015610796.1|/0/PREDICTED: crocetin glucosyltransferase 2 [Oryza sativa Japonica Group]
TCONS_00008924	up	2.83107	LOC_Os04g45890	up	1.73162	-	-	-	-	gi|38345942|emb|CAD41274.2|/0/OSJNBb0103I08.13 [Oryza sativa Japonica Group]
TCONS_00091345	up	2.80973	LOC_Os04g45890	up	1.73162	-	-	-	-	gi|38345942|emb|CAD41274.2|/0/OSJNBb0103I08.13 [Oryza sativa Japonica Group]
TCONS_00005792	up	2.63888	LOC_Os04g45890	up	1.73162	-	-	-	-	gi|38345942|emb|CAD41274.2|/0/OSJNBb0103I08.13 [Oryza sativa Japonica Group]
TCONS_00010868	up	2.63376	LOC_Os04g45890	up	1.73162	-	-	-	-	gi|38345942|emb|CAD41274.2|/0/OSJNBb0103I08.13 [Oryza sativa Japonica Group]
TCONS_00056787	up	2.47695	LOC_Os04g45890	up	1.73162	-	-	-	-	gi|38345942|emb|CAD41274.2|/0/OSJNBb0103I08.13 [Oryza sativa Japonica Group]
TCONS_00059316	up	2.2842	LOC_Os04g45890	up	1.73162	-	-	-	-	gi|38345942|emb|CAD41274.2|/0/OSJNBb0103I08.13 [Oryza sativa Japonica Group]
TCONS_00059822	up	2.24492	LOC_Os04g45890	up	1.73162	-	-	-	-	gi|38345942|emb|CAD41274.2|/0/OSJNBb0103I08.13 [Oryza sativa Japonica Group]
TCONS_00059318	up	1.9494	LOC_Os04g45890	up	1.73162	-	-	-	-	gi|38345942|emb|CAD41274.2|/0/OSJNBb0103I08.13 [Oryza sativa Japonica Group]
TCONS_00070703	up	3.1046	LOC_Os08g04180	up	1.72322	ko00260//Glycine, serine and threonine metabolism;ko00400//Phenylalanine, tyrosine and tryptophan biosynthesis;ko01100//Metabolic pathways;ko01110//Biosynthesis of secondary metabolites	GO:0009507//chloroplast	GO:0004834//tryptophan synthase activity;GO:0030170//pyridoxal phosphate binding	GO:0000162//tryptophan biosynthetic process	gi|113622914|dbj|BAF22859.1|/0/Os08g0135900 [Oryza sativa Japonica Group]
TCONS_00065705	up	2.64989	LOC_Os03g03034	up	1.71909	ko00941//Flavonoid biosynthesis;ko01100//Metabolic pathways;ko01110//Biosynthesis of secondary metabolites	-	GO:0051213//dioxygenase activity;GO:0046872//metal ion binding	GO:0055114//oxidation-reduction process	gi|108705911|gb|ABF93706.1|;gi|108705913|gb|ABF93708.1|;gi|108705912|gb|ABF93707.1|;gi|25446683|gb|AAN74830.1|/0;0;6.63219e-126;2.64059e-131/oxidoreductase, 2OG-Fe oxygenase family protein, expressed [Oryza sativa Japonica Group];oxidoreductase, 2OG-Fe oxygenase family protein, expressed [Oryza sativa Japonica Group];oxidoreductase, 2OG-Fe oxygenase family protein, expressed [Oryza sativa Japonic…
TCONS_00009978	up	1.89024	LOC_Os03g03034	up	1.71909	ko00941//Flavonoid biosynthesis;ko01100//Metabolic pathways;ko01110//Biosynthesis of secondary metabolites	-	GO:0051213//dioxygenase activity;GO:0046872//metal ion binding	GO:0055114//oxidation-reduction process	gi|108705911|gb|ABF93706.1|;gi|108705913|gb|ABF93708.1|;gi|108705912|gb|ABF93707.1|;gi|25446683|gb|AAN74830.1|/0;0;6.63219e-126;2.64059e-131/oxidoreductase, 2OG-Fe oxygenase family protein, expressed [Oryza sativa Japonica Group];oxidoreductase, 2OG-Fe oxygenase family protein, expressed [Oryza sativa Japonica Group];oxidoreductase, 2OG-Fe oxygenase family protein, expressed [Oryza sativa Japonic…
TCONS_00065705	up	2.64989	LOC_Os09g24900	up	1.71068	-	GO:0005768//endosome;GO:0005774//vacuolar membrane;GO:0016021//integral component of membrane;GO:0005802//trans-Golgi network	GO:0008757//S-adenosylmethionine-dependent methyltransferase activity;GO:0016301//kinase activity	GO:0016310//phosphorylation;GO:0032259//methylation	gi|50251539|dbj|BAD28913.1|/0/dehydration-responsive protein-like [Oryza sativa Japonica Group]
TCONS_00008316	up	6.93456	LOC_Os07g44410	up	1.70601	-	-	-	-	gi|113611942|dbj|BAF22320.1|/0/Os07g0638100 [Oryza sativa Japonica Group]
TCONS_00009514	up	7.62476	LOC_Os07g44410	up	1.70601	-	-	-	-	gi|113611942|dbj|BAF22320.1|/0/Os07g0638100 [Oryza sativa Japonica Group]
TCONS_00056787	up	2.47695	LOC_Os06g05130	up	1.70404	ko00061//Fatty acid biosynthesis;ko01100//Metabolic pathways	GO:0009536//plastid	GO:0016790//thiolester hydrolase activity	GO:0006633//fatty acid biosynthetic process	gi|113594816|dbj|BAF18690.1|/0/Os06g0143400 [Oryza sativa Japonica Group]
TCONS_00089479	up	3.07091	LOC_Os05g51130	up	1.7038	-	-	GO:0005524//ATP binding	-	gi|1002270241|ref|XP_015639446.1|/0/PREDICTED: AAA-ATPase At3g50940 [Oryza sativa Japonica Group]
TCONS_00081336	up	7.85557	LOC_Os05g51130	up	1.7038	-	-	GO:0005524//ATP binding	-	gi|1002270241|ref|XP_015639446.1|/0/PREDICTED: AAA-ATPase At3g50940 [Oryza sativa Japonica Group]
TCONS_00081336	up	7.85557	LOC_Os01g09010	up	1.70293	ko00073//Cutin, suberine and wax biosynthesis	-	GO:0016747//transferase activity, transferring acyl groups other than amino-acyl groups	-	gi|113531770|dbj|BAF04153.1|/0/Os01g0185300 [Oryza sativa Japonica Group]
TCONS_00089479	up	3.07091	LOC_Os01g09010	up	1.70293	ko00073//Cutin, suberine and wax biosynthesis	-	GO:0016747//transferase activity, transferring acyl groups other than amino-acyl groups	-	gi|113531770|dbj|BAF04153.1|/0/Os01g0185300 [Oryza sativa Japonica Group]
TCONS_00065705	up	2.64989	LOC_Os01g09010	up	1.70293	ko00073//Cutin, suberine and wax biosynthesis	-	GO:0016747//transferase activity, transferring acyl groups other than amino-acyl groups	-	gi|113531770|dbj|BAF04153.1|/0/Os01g0185300 [Oryza sativa Japonica Group]
TCONS_00081336	up	7.85557	LOC_Os05g38720	up	1.7015	-	GO:0016021//integral component of membrane;GO:0016023//cytoplasmic, membrane-bounded vesicle	-	-	gi|113579318|dbj|BAF17681.1|/0/Os05g0462500 [Oryza sativa Japonica Group]
TCONS_00070703	up	3.1046	LOC_Os05g49170	up	1.70042	-	GO:0016021//integral component of membrane;GO:0009536//plastid	-	-	gi|51854280|gb|AAU10661.1|/4.21757e-98/cold acclimation protein COR413-TM1 [Oryza sativa Japonica Group]
TCONS_00089479	up	3.07091	LOC_Os10g41550	up	1.69312	ko00500//Starch and sucrose metabolism;ko01100//Metabolic pathways	GO:0009570//chloroplast stroma	GO:0016161//beta-amylase activity	GO:0000024//maltose biosynthetic process;GO:0005983//starch catabolic process	gi|31433554|gb|AAP55052.1|/0/Glycosyl hydrolase family 14 protein, expressed [Oryza sativa Japonica Group]
TCONS_00065705	up	2.64989	LOC_Os10g41550	up	1.69312	ko00500//Starch and sucrose metabolism;ko01100//Metabolic pathways	GO:0009570//chloroplast stroma	GO:0016161//beta-amylase activity	GO:0000024//maltose biosynthetic process;GO:0005983//starch catabolic process	gi|31433554|gb|AAP55052.1|/0/Glycosyl hydrolase family 14 protein, expressed [Oryza sativa Japonica Group]
TCONS_00081336	up	7.85557	LOC_Os10g41550	up	1.69312	ko00500//Starch and sucrose metabolism;ko01100//Metabolic pathways	GO:0009570//chloroplast stroma	GO:0016161//beta-amylase activity	GO:0000024//maltose biosynthetic process;GO:0005983//starch catabolic process	gi|31433554|gb|AAP55052.1|/0/Glycosyl hydrolase family 14 protein, expressed [Oryza sativa Japonica Group]
TCONS_00059316	up	2.2842	LOC_Os03g44810	up	1.68975	-	GO:0005634//nucleus	GO:0016874//ligase activity;GO:0061630//ubiquitin protein ligase activity;GO:0008270//zinc ion binding	GO:0016567//protein ubiquitination;GO:0043161//proteasome-mediated ubiquitin-dependent protein catabolic process	gi|75296682|sp|Q7XZZ3.1|BAHL1_ORYSJ;gi|1002254480|ref|XP_015631500.1|/0;2.69867e-164/RecName: Full=Probable E3 ubiquitin-protein ligase BAH1-like 1;PREDICTED: probable E3 ubiquitin-protein ligase BAH1-like 1 isoform X2 [Oryza sativa Japonica Group]
TCONS_00011723	up	1.58332	LOC_Os05g50250	up	1.68737	ko00940//Phenylpropanoid biosynthesis;ko01100//Metabolic pathways;ko01110//Biosynthesis of secondary metabolites	-	GO:0003854//3-beta-hydroxy-delta5-steroid dehydrogenase activity	GO:0006694//steroid biosynthetic process;GO:0055114//oxidation-reduction process	gi|113579964|dbj|BAF18327.1|/0/Os05g0578500 [Oryza sativa Japonica Group]
TCONS_00059316	up	2.2842	LOC_Os04g27810	up	1.68369	-	-	-	-	gi|77551308|gb|ABA94105.1|/5.20035e-40/hypothetical protein LOC_Os11g33280 [Oryza sativa Japonica Group]
TCONS_00081336	up	7.85557	LOC_Os04g27810	up	1.68369	-	-	-	-	gi|77551308|gb|ABA94105.1|/5.20035e-40/hypothetical protein LOC_Os11g33280 [Oryza sativa Japonica Group]
TCONS_00059316	up	2.2842	LOC_Os03g14370	up	1.6823	-	-	GO:0016597//amino acid binding	GO:0008152//metabolic process	gi|108707164|gb|ABF94959.1|;gi|108707165|gb|ABF94960.1|/0;0/ACT domain containing protein, expressed [Oryza sativa Japonica Group];ACT domain containing protein, expressed [Oryza sativa Japonica Group]
TCONS_00081336	up	7.85557	LOC_Os03g14370	up	1.6823	-	-	GO:0016597//amino acid binding	GO:0008152//metabolic process	gi|108707164|gb|ABF94959.1|;gi|108707165|gb|ABF94960.1|/0;0/ACT domain containing protein, expressed [Oryza sativa Japonica Group];ACT domain containing protein, expressed [Oryza sativa Japonica Group]
TCONS_00070703	up	3.1046	LOC_Os06g18010	up	1.68036	ko00943//Isoflavonoid biosynthesis;ko00940//Phenylpropanoid biosynthesis	GO:0043231//intracellular membrane-bounded organelle	GO:0080043//quercetin 3-O-glucosyltransferase activity;GO:0080044//quercetin 7-O-glucosyltransferase activity	GO:0009813//flavonoid biosynthetic process;GO:0052696//flavonoid glucuronidation	gi|75287487|sp|Q5VMI0.1|CGT_ORYSJ/0/RecName: Full=UDP-glucose:2-hydroxyflavanone C-glucosyltransferase; Short=OsCGT
TCONS_00091345	up	2.80973	LOC_Os06g48210	up	1.67767	-	GO:0071013//catalytic step 2 spliceosome	GO:0003723//RNA binding;GO:0004004//ATP-dependent RNA helicase activity;GO:0008270//zinc ion binding;GO:0005524//ATP binding	GO:0010501//RNA secondary structure unwinding	gi|75321947|sp|Q5Z6G5.1|RH35B_ORYSJ/0/RecName: Full=DEAD-box ATP-dependent RNA helicase 35B
TCONS_00056787	up	2.47695	LOC_Os06g48210	up	1.67767	-	GO:0071013//catalytic step 2 spliceosome	GO:0003723//RNA binding;GO:0004004//ATP-dependent RNA helicase activity;GO:0008270//zinc ion binding;GO:0005524//ATP binding	GO:0010501//RNA secondary structure unwinding	gi|75321947|sp|Q5Z6G5.1|RH35B_ORYSJ/0/RecName: Full=DEAD-box ATP-dependent RNA helicase 35B
TCONS_00059822	up	2.24492	LOC_Os06g48210	up	1.67767	-	GO:0071013//catalytic step 2 spliceosome	GO:0003723//RNA binding;GO:0004004//ATP-dependent RNA helicase activity;GO:0008270//zinc ion binding;GO:0005524//ATP binding	GO:0010501//RNA secondary structure unwinding	gi|75321947|sp|Q5Z6G5.1|RH35B_ORYSJ/0/RecName: Full=DEAD-box ATP-dependent RNA helicase 35B
TCONS_00056787	up	2.47695	LOC_Os09g27010	up	1.67577	ko00903//Limonene and pinene degradation;ko00642//Ethylbenzene degradation;ko00362//Benzoate degradation;ko00240//Pyrimidine metabolism;ko00051//Fructose and mannose metabolism;ko04976//Bile secretion;ko01120//Microbial metabolism in diverse environments;ko01100//Metabolic pathways;ko00627//Aminobenzoate degradation;ko00350//Tyrosine metabolism;ko02010//ABC transporters	GO:0009536//plastid	GO:0004672//protein kinase activity;GO:0005524//ATP binding	GO:0006468//protein phosphorylation	gi|113631521|dbj|BAF25202.1|/0/Os09g0442100 [Oryza sativa Japonica Group]
TCONS_00059822	up	2.24492	LOC_Os09g27010	up	1.67577	ko00903//Limonene and pinene degradation;ko00642//Ethylbenzene degradation;ko00362//Benzoate degradation;ko00240//Pyrimidine metabolism;ko00051//Fructose and mannose metabolism;ko04976//Bile secretion;ko01120//Microbial metabolism in diverse environments;ko01100//Metabolic pathways;ko00627//Aminobenzoate degradation;ko00350//Tyrosine metabolism;ko02010//ABC transporters	GO:0009536//plastid	GO:0004672//protein kinase activity;GO:0005524//ATP binding	GO:0006468//protein phosphorylation	gi|113631521|dbj|BAF25202.1|/0/Os09g0442100 [Oryza sativa Japonica Group]
TCONS_00065705	up	2.64989	LOC_Os05g45100	up	1.67496	ko00943//Isoflavonoid biosynthesis	GO:0043231//intracellular membrane-bounded organelle	GO:0080043//quercetin 3-O-glucosyltransferase activity;GO:0080044//quercetin 7-O-glucosyltransferase activity	GO:0009813//flavonoid biosynthetic process;GO:0052696//flavonoid glucuronidation	gi|255676508|dbj|BAF18021.2|/0/Os05g0527000 [Oryza sativa Japonica Group]
TCONS_00059316	up	2.2842	LOC_Os04g43200	up	1.6707	-	GO:0016021//integral component of membrane;GO:0012511//monolayer-surrounded lipid storage body;GO:0031969//chloroplast membrane;GO:0005773//vacuole;GO:0005783//endoplasmic reticulum	GO:0005509//calcium ion binding;GO:1990137//plant seed peroxidase activity	GO:0031407//oxylipin metabolic process;GO:0010118//stomatal movement;GO:0055114//oxidation-reduction process;GO:1902609//(R)-2-hydroxy-alpha-linolenic acid biosynthetic process;GO:2000377//regulation of reactive oxygen species metabolic process;GO:0050832//defense response to fungus	gi|75139565|sp|Q7FAX1.1|PXG_ORYSJ/0/RecName: Full=Peroxygenase
TCONS_00089479	up	3.07091	LOC_Os12g05440	up	1.66433	ko00624//Polycyclic aromatic hydrocarbon degradation;ko00903//Limonene and pinene degradation;ko00073//Cutin, suberine and wax biosynthesis;ko01120//Microbial metabolism in diverse environments;ko01100//Metabolic pathways;ko00627//Aminobenzoate degradation;ko00945//Stilbenoid, diarylheptanoid and gingerol biosynthesis;ko00363//Bisphenol degradation;ko01110//Biosynthesis of secondary metabolites	GO:0016021//integral component of membrane	GO:0020037//heme binding;GO:0016705//oxidoreductase activity, acting on paired donors, with incorporation or reduction of molecular oxygen;GO:0004497//monooxygenase activity;GO:0005506//iron ion binding	GO:0055114//oxidation-reduction process	gi|255670055|dbj|BAF29185.2|/0/Os12g0150200, partial [Oryza sativa Japonica Group]
TCONS_00065705	up	2.64989	LOC_Os12g05440	up	1.66433	ko00624//Polycyclic aromatic hydrocarbon degradation;ko00903//Limonene and pinene degradation;ko00073//Cutin, suberine and wax biosynthesis;ko01120//Microbial metabolism in diverse environments;ko01100//Metabolic pathways;ko00627//Aminobenzoate degradation;ko00945//Stilbenoid, diarylheptanoid and gingerol biosynthesis;ko00363//Bisphenol degradation;ko01110//Biosynthesis of secondary metabolites	GO:0016021//integral component of membrane	GO:0020037//heme binding;GO:0016705//oxidoreductase activity, acting on paired donors, with incorporation or reduction of molecular oxygen;GO:0004497//monooxygenase activity;GO:0005506//iron ion binding	GO:0055114//oxidation-reduction process	gi|255670055|dbj|BAF29185.2|/0/Os12g0150200, partial [Oryza sativa Japonica Group]
TCONS_00059316	up	2.2842	LOC_Os06g34090	up	1.66411	ko04978//Mineral absorption;ko00908//Zeatin biosynthesis;ko01100//Metabolic pathways;ko03008//Ribosome biogenesis in eukaryotes;ko01110//Biosynthesis of secondary metabolites;ko03018//RNA degradation	GO:0016021//integral component of membrane	GO:0003676//nucleic acid binding;GO:0008270//zinc ion binding	GO:0015074//DNA integration	gi|77556089|gb|ABA98885.1|/0/retrotransposon protein, putative, Ty1-copia subclass [Oryza sativa Japonica Group]
TCONS_00059318	up	1.9494	LOC_Os06g34090	up	1.66411	ko04978//Mineral absorption;ko00908//Zeatin biosynthesis;ko01100//Metabolic pathways;ko03008//Ribosome biogenesis in eukaryotes;ko01110//Biosynthesis of secondary metabolites;ko03018//RNA degradation	GO:0016021//integral component of membrane	GO:0003676//nucleic acid binding;GO:0008270//zinc ion binding	GO:0015074//DNA integration	gi|77556089|gb|ABA98885.1|/0/retrotransposon protein, putative, Ty1-copia subclass [Oryza sativa Japonica Group]
TCONS_00056787	up	2.47695	LOC_Os11g26130	up	1.65983	ko00903//Limonene and pinene degradation;ko00642//Ethylbenzene degradation;ko00362//Benzoate degradation;ko00240//Pyrimidine metabolism;ko00051//Fructose and mannose metabolism;ko01120//Microbial metabolism in diverse environments;ko01100//Metabolic pathways;ko00627//Aminobenzoate degradation;ko00350//Tyrosine metabolism	GO:0016021//integral component of membrane;GO:0016023//cytoplasmic, membrane-bounded vesicle	GO:0005524//ATP binding;GO:0004674//protein serine/threonine kinase activity	GO:0006468//protein phosphorylation	gi|62701711|gb|AAX92784.1|/0/receptor-like kinase RHG4 [Oryza sativa Japonica Group]
TCONS_00089479	up	3.07091	LOC_Os01g56560	up	1.65965	-	GO:0005739//mitochondrion	-	-	gi|125527874|gb|EAY75988.1|/6.78945e-136/hypothetical protein OsI_03911 [Oryza sativa Indica Group]
TCONS_00065705	up	2.64989	LOC_Os01g56560	up	1.65965	-	GO:0005739//mitochondrion	-	-	gi|125527874|gb|EAY75988.1|/6.78945e-136/hypothetical protein OsI_03911 [Oryza sativa Indica Group]
TCONS_00081336	up	7.85557	LOC_Os01g68770	up	1.65698	-	-	GO:0008430//selenium binding	-	gi|113534725|dbj|BAF07108.1|/0/Os01g0916400 [Oryza sativa Japonica Group]
TCONS_00089479	up	3.07091	LOC_Os03g12890	up	1.65516	ko00770//Pantothenate and CoA biosynthesis;ko00790//Folate biosynthesis;ko00966//Glucosinolate biosynthesis;ko00290//Valine, leucine and isoleucine biosynthesis;ko01100//Metabolic pathways;ko03010//Ribosome;ko00280//Valine, leucine and isoleucine degradation;ko01110//Biosynthesis of secondary metabolites	-	GO:0052654//L-leucine transaminase activity;GO:0052656//L-isoleucine transaminase activity;GO:0052655//L-valine transaminase activity	GO:0009081//branched-chain amino acid metabolic process	gi|108706993|gb|ABF94788.1|;gi|113547932|dbj|BAF11375.1|;gi|108706992|gb|ABF94787.1|;gi|108706991|gb|ABF94786.1|/0;0;0;0/Branched-chain-amino-acid aminotransferase 5, chloroplast precursor, putative, expressed [Oryza sativa Japonica Group];Os03g0231600 [Oryza sativa Japonica Group];Branched-chain-amino-acid aminotransferase 5, chloroplast precursor, putative, expressed [Oryza sativa Japonica Grou…
TCONS_00065705	up	2.64989	LOC_Os03g12890	up	1.65516	ko00770//Pantothenate and CoA biosynthesis;ko00790//Folate biosynthesis;ko00966//Glucosinolate biosynthesis;ko00290//Valine, leucine and isoleucine biosynthesis;ko01100//Metabolic pathways;ko03010//Ribosome;ko00280//Valine, leucine and isoleucine degradation;ko01110//Biosynthesis of secondary metabolites	-	GO:0052654//L-leucine transaminase activity;GO:0052656//L-isoleucine transaminase activity;GO:0052655//L-valine transaminase activity	GO:0009081//branched-chain amino acid metabolic process	gi|108706993|gb|ABF94788.1|;gi|113547932|dbj|BAF11375.1|;gi|108706992|gb|ABF94787.1|;gi|108706991|gb|ABF94786.1|/0;0;0;0/Branched-chain-amino-acid aminotransferase 5, chloroplast precursor, putative, expressed [Oryza sativa Japonica Group];Os03g0231600 [Oryza sativa Japonica Group];Branched-chain-amino-acid aminotransferase 5, chloroplast precursor, putative, expressed [Oryza sativa Japonica Grou…
TCONS_00011723	up	1.58332	LOC_Os12g26940	up	1.65289	ko04075//Plant hormone signal transduction	GO:0016023//cytoplasmic, membrane-bounded vesicle;GO:0016021//integral component of membrane;GO:0005886//plasma membrane	GO:0004673//protein histidine kinase activity;GO:0004674//protein serine/threonine kinase activity;GO:0005524//ATP binding	GO:0009888//tissue development;GO:0009605//response to external stimulus;GO:0048831//regulation of shoot system development;GO:1901701;GO:0009736//cytokinin-activated signaling pathway;GO:0048580;GO:0006468//protein phosphorylation;GO:0044710;GO:0009628//response to abiotic stimulus;GO:0000160//phosphorelay signal transduction system;GO:0033554//cellular response to stress	gi|122204337|sp|Q2QRN7.1|CHARK_ORYSJ/0/RecName: Full=Probable kinase CHARK; AltName: Full=CHASE domain receptor-like serine/threonine kinase; AltName: Full=OsCRL4; AltName: Full=OsHKL1
TCONS_00089479	up	3.07091	LOC_Os06g48470	up	1.65093	ko03440//Homologous recombination;ko00240//Pyrimidine metabolism;ko01100//Metabolic pathways;ko03460//Fanconi anemia pathway;ko02020//Two-component system;ko02010//ABC transporters;ko00670//One carbon pool by folate	-	GO:0004523//RNA-DNA hybrid ribonuclease activity;GO:0003676//nucleic acid binding	GO:0090502//RNA phosphodiester bond hydrolysis, endonucleolytic;GO:0015074//DNA integration	gi|77554831|gb|ABA97627.1|/0/retrotransposon protein, putative, Ty3-gypsy subclass [Oryza sativa Japonica Group]
TCONS_00065705	up	2.64989	LOC_Os06g48470	up	1.65093	ko03440//Homologous recombination;ko00240//Pyrimidine metabolism;ko01100//Metabolic pathways;ko03460//Fanconi anemia pathway;ko02020//Two-component system;ko02010//ABC transporters;ko00670//One carbon pool by folate	-	GO:0004523//RNA-DNA hybrid ribonuclease activity;GO:0003676//nucleic acid binding	GO:0090502//RNA phosphodiester bond hydrolysis, endonucleolytic;GO:0015074//DNA integration	gi|77554831|gb|ABA97627.1|/0/retrotransposon protein, putative, Ty3-gypsy subclass [Oryza sativa Japonica Group]
TCONS_00065705	up	2.64989	LOC_Os06g38670	up	1.64682	ko04626//Plant-pathogen interaction	GO:0016021//integral component of membrane;GO:0016023//cytoplasmic, membrane-bounded vesicle	GO:0005524//ATP binding;GO:0004674//protein serine/threonine kinase activity	GO:0006468//protein phosphorylation	gi|255677180|dbj|BAH93601.1|/0/Os06g0586150 [Oryza sativa Japonica Group]
TCONS_00009978	up	1.89024	LOC_Os12g29220	up	1.6448	-	GO:0005887//integral component of plasma membrane	GO:0051119//sugar transmembrane transporter activity	GO:0034219//carbohydrate transmembrane transport	gi|122204154|sp|Q2QR07.1|SWT13_ORYSJ/1.88228e-155/RecName: Full=Bidirectional sugar transporter SWEET13; Short=OsSWEET13
TCONS_00070703	up	3.1046	LOC_Os09g30458	up	1.63993	-	-	GO:0004252//serine-type endopeptidase activity	GO:0006508//proteolysis	gi|1002294678|ref|XP_015610772.1|/0/PREDICTED: CO(2)-response secreted protease [Oryza sativa Japonica Group]
TCONS_00091345	up	2.80973	LOC_Os02g47470	up	1.63825	ko00906//Carotenoid biosynthesis	GO:0016021//integral component of membrane;GO:0005789//endoplasmic reticulum membrane	GO:0010295//(+)-abscisic acid 8'-hydroxylase activity;GO:0020037//heme binding;GO:0005506//iron ion binding	GO:0016132//brassinosteroid biosynthetic process;GO:0055114//oxidation-reduction process;GO:0010268//brassinosteroid homeostasis;GO:0007275//multicellular organism development;GO:0046345//abscisic acid catabolic process;GO:0016125//sterol metabolic process	gi|122163981|sp|Q05JG2.1|ABAH1_ORYSJ;gi|255671195|dbj|BAH91860.1|/0;1.00874e-162/RecName: Full=Abscisic acid 8'-hydroxylase 1; Short=ABA 8'-hydroxylase 1; AltName: Full=Cytochrome P450 707A5; AltName: Full=OsABA8ox1;Os02g0703600 [Oryza sativa Japonica Group]
TCONS_00005781	up	3.08006	LOC_Os02g47470	up	1.63825	ko00906//Carotenoid biosynthesis	GO:0016021//integral component of membrane;GO:0005789//endoplasmic reticulum membrane	GO:0010295//(+)-abscisic acid 8'-hydroxylase activity;GO:0020037//heme binding;GO:0005506//iron ion binding	GO:0016132//brassinosteroid biosynthetic process;GO:0055114//oxidation-reduction process;GO:0010268//brassinosteroid homeostasis;GO:0007275//multicellular organism development;GO:0046345//abscisic acid catabolic process;GO:0016125//sterol metabolic process	gi|122163981|sp|Q05JG2.1|ABAH1_ORYSJ;gi|255671195|dbj|BAH91860.1|/0;1.00874e-162/RecName: Full=Abscisic acid 8'-hydroxylase 1; Short=ABA 8'-hydroxylase 1; AltName: Full=Cytochrome P450 707A5; AltName: Full=OsABA8ox1;Os02g0703600 [Oryza sativa Japonica Group]
TCONS_00010868	up	2.63376	LOC_Os02g47470	up	1.63825	ko00906//Carotenoid biosynthesis	GO:0016021//integral component of membrane;GO:0005789//endoplasmic reticulum membrane	GO:0010295//(+)-abscisic acid 8'-hydroxylase activity;GO:0020037//heme binding;GO:0005506//iron ion binding	GO:0016132//brassinosteroid biosynthetic process;GO:0055114//oxidation-reduction process;GO:0010268//brassinosteroid homeostasis;GO:0007275//multicellular organism development;GO:0046345//abscisic acid catabolic process;GO:0016125//sterol metabolic process	gi|122163981|sp|Q05JG2.1|ABAH1_ORYSJ;gi|255671195|dbj|BAH91860.1|/0;1.00874e-162/RecName: Full=Abscisic acid 8'-hydroxylase 1; Short=ABA 8'-hydroxylase 1; AltName: Full=Cytochrome P450 707A5; AltName: Full=OsABA8ox1;Os02g0703600 [Oryza sativa Japonica Group]
TCONS_00059822	up	2.24492	LOC_Os02g47470	up	1.63825	ko00906//Carotenoid biosynthesis	GO:0016021//integral component of membrane;GO:0005789//endoplasmic reticulum membrane	GO:0010295//(+)-abscisic acid 8'-hydroxylase activity;GO:0020037//heme binding;GO:0005506//iron ion binding	GO:0016132//brassinosteroid biosynthetic process;GO:0055114//oxidation-reduction process;GO:0010268//brassinosteroid homeostasis;GO:0007275//multicellular organism development;GO:0046345//abscisic acid catabolic process;GO:0016125//sterol metabolic process	gi|122163981|sp|Q05JG2.1|ABAH1_ORYSJ;gi|255671195|dbj|BAH91860.1|/0;1.00874e-162/RecName: Full=Abscisic acid 8'-hydroxylase 1; Short=ABA 8'-hydroxylase 1; AltName: Full=Cytochrome P450 707A5; AltName: Full=OsABA8ox1;Os02g0703600 [Oryza sativa Japonica Group]
TCONS_00008924	up	2.83107	LOC_Os01g74490	up	1.63499	ko04978//Mineral absorption	GO:0005737//cytoplasm	GO:0046914//transition metal ion binding	GO:0046916//cellular transition metal ion homeostasis;GO:0030001//metal ion transport	gi|15290146|dbj|BAB63837.1|/7.25481e-87/heavy-metal-associated domain-containing protein-like [Oryza sativa Japonica Group]
TCONS_00091345	up	2.80973	LOC_Os01g74490	up	1.63499	ko04978//Mineral absorption	GO:0005737//cytoplasm	GO:0046914//transition metal ion binding	GO:0046916//cellular transition metal ion homeostasis;GO:0030001//metal ion transport	gi|15290146|dbj|BAB63837.1|/7.25481e-87/heavy-metal-associated domain-containing protein-like [Oryza sativa Japonica Group]
TCONS_00005781	up	3.08006	LOC_Os01g74490	up	1.63499	ko04978//Mineral absorption	GO:0005737//cytoplasm	GO:0046914//transition metal ion binding	GO:0046916//cellular transition metal ion homeostasis;GO:0030001//metal ion transport	gi|15290146|dbj|BAB63837.1|/7.25481e-87/heavy-metal-associated domain-containing protein-like [Oryza sativa Japonica Group]
TCONS_00005792	up	2.63888	LOC_Os01g74490	up	1.63499	ko04978//Mineral absorption	GO:0005737//cytoplasm	GO:0046914//transition metal ion binding	GO:0046916//cellular transition metal ion homeostasis;GO:0030001//metal ion transport	gi|15290146|dbj|BAB63837.1|/7.25481e-87/heavy-metal-associated domain-containing protein-like [Oryza sativa Japonica Group]
TCONS_00010868	up	2.63376	LOC_Os01g74490	up	1.63499	ko04978//Mineral absorption	GO:0005737//cytoplasm	GO:0046914//transition metal ion binding	GO:0046916//cellular transition metal ion homeostasis;GO:0030001//metal ion transport	gi|15290146|dbj|BAB63837.1|/7.25481e-87/heavy-metal-associated domain-containing protein-like [Oryza sativa Japonica Group]
TCONS_00056787	up	2.47695	LOC_Os01g74490	up	1.63499	ko04978//Mineral absorption	GO:0005737//cytoplasm	GO:0046914//transition metal ion binding	GO:0046916//cellular transition metal ion homeostasis;GO:0030001//metal ion transport	gi|15290146|dbj|BAB63837.1|/7.25481e-87/heavy-metal-associated domain-containing protein-like [Oryza sativa Japonica Group]
TCONS_00059822	up	2.24492	LOC_Os01g74490	up	1.63499	ko04978//Mineral absorption	GO:0005737//cytoplasm	GO:0046914//transition metal ion binding	GO:0046916//cellular transition metal ion homeostasis;GO:0030001//metal ion transport	gi|15290146|dbj|BAB63837.1|/7.25481e-87/heavy-metal-associated domain-containing protein-like [Oryza sativa Japonica Group]
TCONS_00065705	up	2.64989	LOC_Os02g49390	up	1.63496	ko03440//Homologous recombination;ko00240//Pyrimidine metabolism;ko01100//Metabolic pathways;ko03460//Fanconi anemia pathway;ko02020//Two-component system;ko02010//ABC transporters;ko00670//One carbon pool by folate	-	GO:0004523//RNA-DNA hybrid ribonuclease activity;GO:0003964//RNA-directed DNA polymerase activity;GO:0003677//DNA binding;GO:0003723//RNA binding	GO:0090502//RNA phosphodiester bond hydrolysis, endonucleolytic;GO:0006278//RNA-dependent DNA biosynthetic process;GO:0015074//DNA integration;GO:0006310//DNA recombination	gi|14018058|gb|AAK52121.1|AC079936_17/0/Putative retroelement [Oryza sativa Japonica Group]
TCONS_00081336	up	7.85557	LOC_Os03g20840	up	1.62208	ko00230//Purine metabolism;ko04623//Cytosolic DNA-sensing pathway;ko04626//Plant-pathogen interaction;ko05016//Huntington's disease;ko05169//Epstein-Barr virus infection;ko00240//Pyrimidine metabolism;ko01100//Metabolic pathways;ko03020//RNA polymerase	-	GO:0043531//ADP binding	-	gi|108707907|gb|ABF95702.1|/0/NB-ARC domain containing protein, expressed [Oryza sativa Japonica Group]
TCONS_00089479	up	3.07091	LOC_Os03g20840	up	1.62208	ko00230//Purine metabolism;ko04623//Cytosolic DNA-sensing pathway;ko04626//Plant-pathogen interaction;ko05016//Huntington's disease;ko05169//Epstein-Barr virus infection;ko00240//Pyrimidine metabolism;ko01100//Metabolic pathways;ko03020//RNA polymerase	-	GO:0043531//ADP binding	-	gi|108707907|gb|ABF95702.1|/0/NB-ARC domain containing protein, expressed [Oryza sativa Japonica Group]
TCONS_00065705	up	2.64989	LOC_Os03g20840	up	1.62208	ko00230//Purine metabolism;ko04623//Cytosolic DNA-sensing pathway;ko04626//Plant-pathogen interaction;ko05016//Huntington's disease;ko05169//Epstein-Barr virus infection;ko00240//Pyrimidine metabolism;ko01100//Metabolic pathways;ko03020//RNA polymerase	-	GO:0043531//ADP binding	-	gi|108707907|gb|ABF95702.1|/0/NB-ARC domain containing protein, expressed [Oryza sativa Japonica Group]
TCONS_00089479	up	3.07091	LOC_Os01g09280	up	1.61878	-	GO:0005634//nucleus	GO:0008270//zinc ion binding;GO:0003677//DNA binding	GO:0009723//response to ethylene;GO:0006355//regulation of transcription, DNA-templated	gi|113531785|dbj|BAF04168.1|/0/Os01g0187900 [Oryza sativa Japonica Group]
TCONS_00065705	up	2.64989	LOC_Os01g09280	up	1.61878	-	GO:0005634//nucleus	GO:0008270//zinc ion binding;GO:0003677//DNA binding	GO:0009723//response to ethylene;GO:0006355//regulation of transcription, DNA-templated	gi|113531785|dbj|BAF04168.1|/0/Os01g0187900 [Oryza sativa Japonica Group]
TCONS_00091345	up	2.80973	LOC_Os11g16310	up	1.61862	-	GO:0016021//integral component of membrane;GO:0016023//cytoplasmic, membrane-bounded vesicle	-	-	gi|1002304652|ref|XP_015615667.1|/0/PREDICTED: uncharacterized protein LOC4350239 isoform X1 [Oryza sativa Japonica Group]
TCONS_00008316	up	6.93456	LOC_Os11g16310	up	1.61862	-	GO:0016021//integral component of membrane;GO:0016023//cytoplasmic, membrane-bounded vesicle	-	-	gi|1002304652|ref|XP_015615667.1|/0/PREDICTED: uncharacterized protein LOC4350239 isoform X1 [Oryza sativa Japonica Group]
TCONS_00005781	up	3.08006	LOC_Os11g16310	up	1.61862	-	GO:0016021//integral component of membrane;GO:0016023//cytoplasmic, membrane-bounded vesicle	-	-	gi|1002304652|ref|XP_015615667.1|/0/PREDICTED: uncharacterized protein LOC4350239 isoform X1 [Oryza sativa Japonica Group]
TCONS_00059822	up	2.24492	LOC_Os11g16310	up	1.61862	-	GO:0016021//integral component of membrane;GO:0016023//cytoplasmic, membrane-bounded vesicle	-	-	gi|1002304652|ref|XP_015615667.1|/0/PREDICTED: uncharacterized protein LOC4350239 isoform X1 [Oryza sativa Japonica Group]
TCONS_00056787	up	2.47695	LOC_Os07g07974	up	1.61759	-	-	-	-	gi|113610554|dbj|BAF20932.1|/0/Os07g0176200 [Oryza sativa Japonica Group]
TCONS_00008924	up	2.83107	LOC_Os04g57140	up	1.61675	-	GO:0005871//kinesin complex	GO:0008017//microtubule binding;GO:0016491//oxidoreductase activity;GO:0016887//ATPase activity;GO:0005524//ATP binding;GO:0005516//calmodulin binding;GO:0003777//microtubule motor activity	GO:0007018//microtubule-based movement;GO:0055114//oxidation-reduction process	gi|125591982|gb|EAZ32332.1|;gi|937916596|dbj|BAS91515.1|/0;0/hypothetical protein OsJ_16543 [Oryza sativa Japonica Group];Os04g0666900, partial [Oryza sativa Japonica Group]
TCONS_00091345	up	2.80973	LOC_Os04g57140	up	1.61675	-	GO:0005871//kinesin complex	GO:0008017//microtubule binding;GO:0016491//oxidoreductase activity;GO:0016887//ATPase activity;GO:0005524//ATP binding;GO:0005516//calmodulin binding;GO:0003777//microtubule motor activity	GO:0007018//microtubule-based movement;GO:0055114//oxidation-reduction process	gi|125591982|gb|EAZ32332.1|;gi|937916596|dbj|BAS91515.1|/0;0/hypothetical protein OsJ_16543 [Oryza sativa Japonica Group];Os04g0666900, partial [Oryza sativa Japonica Group]
TCONS_00005792	up	2.63888	LOC_Os04g57140	up	1.61675	-	GO:0005871//kinesin complex	GO:0008017//microtubule binding;GO:0016491//oxidoreductase activity;GO:0016887//ATPase activity;GO:0005524//ATP binding;GO:0005516//calmodulin binding;GO:0003777//microtubule motor activity	GO:0007018//microtubule-based movement;GO:0055114//oxidation-reduction process	gi|125591982|gb|EAZ32332.1|;gi|937916596|dbj|BAS91515.1|/0;0/hypothetical protein OsJ_16543 [Oryza sativa Japonica Group];Os04g0666900, partial [Oryza sativa Japonica Group]
TCONS_00010868	up	2.63376	LOC_Os04g57140	up	1.61675	-	GO:0005871//kinesin complex	GO:0008017//microtubule binding;GO:0016491//oxidoreductase activity;GO:0016887//ATPase activity;GO:0005524//ATP binding;GO:0005516//calmodulin binding;GO:0003777//microtubule motor activity	GO:0007018//microtubule-based movement;GO:0055114//oxidation-reduction process	gi|125591982|gb|EAZ32332.1|;gi|937916596|dbj|BAS91515.1|/0;0/hypothetical protein OsJ_16543 [Oryza sativa Japonica Group];Os04g0666900, partial [Oryza sativa Japonica Group]
TCONS_00056787	up	2.47695	LOC_Os04g57140	up	1.61675	-	GO:0005871//kinesin complex	GO:0008017//microtubule binding;GO:0016491//oxidoreductase activity;GO:0016887//ATPase activity;GO:0005524//ATP binding;GO:0005516//calmodulin binding;GO:0003777//microtubule motor activity	GO:0007018//microtubule-based movement;GO:0055114//oxidation-reduction process	gi|125591982|gb|EAZ32332.1|;gi|937916596|dbj|BAS91515.1|/0;0/hypothetical protein OsJ_16543 [Oryza sativa Japonica Group];Os04g0666900, partial [Oryza sativa Japonica Group]
TCONS_00059822	up	2.24492	LOC_Os04g57140	up	1.61675	-	GO:0005871//kinesin complex	GO:0008017//microtubule binding;GO:0016491//oxidoreductase activity;GO:0016887//ATPase activity;GO:0005524//ATP binding;GO:0005516//calmodulin binding;GO:0003777//microtubule motor activity	GO:0007018//microtubule-based movement;GO:0055114//oxidation-reduction process	gi|125591982|gb|EAZ32332.1|;gi|937916596|dbj|BAS91515.1|/0;0/hypothetical protein OsJ_16543 [Oryza sativa Japonica Group];Os04g0666900, partial [Oryza sativa Japonica Group]
TCONS_00008924	up	2.83107	LOC_Os04g43440	up	1.59992	ko04626//Plant-pathogen interaction	-	GO:0043531//ADP binding;GO:0005524//ATP binding	-	gi|38344648|emb|CAE02341.2|;gi|218195212|gb|EEC77639.1|/1.82401e-34;0/OSJNBb0072M01.2 [Oryza sativa Japonica Group];hypothetical protein OsI_16631 [Oryza sativa Indica Group]
TCONS_00091345	up	2.80973	LOC_Os04g43440	up	1.59992	ko04626//Plant-pathogen interaction	-	GO:0043531//ADP binding;GO:0005524//ATP binding	-	gi|38344648|emb|CAE02341.2|;gi|218195212|gb|EEC77639.1|/1.82401e-34;0/OSJNBb0072M01.2 [Oryza sativa Japonica Group];hypothetical protein OsI_16631 [Oryza sativa Indica Group]
TCONS_00005792	up	2.63888	LOC_Os04g43440	up	1.59992	ko04626//Plant-pathogen interaction	-	GO:0043531//ADP binding;GO:0005524//ATP binding	-	gi|38344648|emb|CAE02341.2|;gi|218195212|gb|EEC77639.1|/1.82401e-34;0/OSJNBb0072M01.2 [Oryza sativa Japonica Group];hypothetical protein OsI_16631 [Oryza sativa Indica Group]
TCONS_00010868	up	2.63376	LOC_Os04g43440	up	1.59992	ko04626//Plant-pathogen interaction	-	GO:0043531//ADP binding;GO:0005524//ATP binding	-	gi|38344648|emb|CAE02341.2|;gi|218195212|gb|EEC77639.1|/1.82401e-34;0/OSJNBb0072M01.2 [Oryza sativa Japonica Group];hypothetical protein OsI_16631 [Oryza sativa Indica Group]
TCONS_00056787	up	2.47695	LOC_Os04g43440	up	1.59992	ko04626//Plant-pathogen interaction	-	GO:0043531//ADP binding;GO:0005524//ATP binding	-	gi|38344648|emb|CAE02341.2|;gi|218195212|gb|EEC77639.1|/1.82401e-34;0/OSJNBb0072M01.2 [Oryza sativa Japonica Group];hypothetical protein OsI_16631 [Oryza sativa Indica Group]
TCONS_00059822	up	2.24492	LOC_Os04g43440	up	1.59992	ko04626//Plant-pathogen interaction	-	GO:0043531//ADP binding;GO:0005524//ATP binding	-	gi|38344648|emb|CAE02341.2|;gi|218195212|gb|EEC77639.1|/1.82401e-34;0/OSJNBb0072M01.2 [Oryza sativa Japonica Group];hypothetical protein OsI_16631 [Oryza sativa Indica Group]
TCONS_00009978	up	1.89024	LOC_Os01g53090	up	1.59407	-	-	-	-	gi|113533679|dbj|BAF06062.1|/2.43237e-176/Os01g0731100 [Oryza sativa Japonica Group]
TCONS_00089479	up	3.07091	LOC_Os08g41880	up	1.59107	-	-	GO:0046872//metal ion binding;GO:0003993//acid phosphatase activity	GO:0016311//dephosphorylation	gi|111036652|dbj|BAF02354.1|/0/nucleotide pyrophosphatase [Oryza sativa Japonica Group]
TCONS_00065705	up	2.64989	LOC_Os08g41880	up	1.59107	-	-	GO:0046872//metal ion binding;GO:0003993//acid phosphatase activity	GO:0016311//dephosphorylation	gi|111036652|dbj|BAF02354.1|/0/nucleotide pyrophosphatase [Oryza sativa Japonica Group]
TCONS_00065705	up	2.64989	LOC_Os05g46240	up	1.59042	-	GO:0005794//Golgi apparatus;GO:0016021//integral component of membrane;GO:0005783//endoplasmic reticulum	-	GO:0010105//negative regulation of ethylene-activated signaling pathway	gi|113579727|dbj|BAF18090.1|/5.0619e-171/Os05g0539800 [Oryza sativa Japonica Group]
TCONS_00008924	up	2.83107	LOC_Os09g21210	up	1.59025	ko02060//Phosphotransferase system (PTS);ko01120//Microbial metabolism in diverse environments;ko01100//Metabolic pathways;ko00480//Glutathione metabolism;ko00030//Pentose phosphate pathway;ko01110//Biosynthesis of secondary metabolites;ko00053//Ascorbate and aldarate metabolism	GO:0009986//cell surface	GO:0052861//glucan endo-1,3-beta-glucanase activity, C-3 substituted reducing group;GO:0042973//glucan endo-1,3-beta-D-glucosidase activity	GO:0006076//(1->3)-beta-D-glucan catabolic process	gi|1002297777|ref|XP_015612312.1|/0/PREDICTED: probable endo-1,3(4)-beta-glucanase ARB_01444 [Oryza sativa Japonica Group]
TCONS_00091345	up	2.80973	LOC_Os09g21210	up	1.59025	ko02060//Phosphotransferase system (PTS);ko01120//Microbial metabolism in diverse environments;ko01100//Metabolic pathways;ko00480//Glutathione metabolism;ko00030//Pentose phosphate pathway;ko01110//Biosynthesis of secondary metabolites;ko00053//Ascorbate and aldarate metabolism	GO:0009986//cell surface	GO:0052861//glucan endo-1,3-beta-glucanase activity, C-3 substituted reducing group;GO:0042973//glucan endo-1,3-beta-D-glucosidase activity	GO:0006076//(1->3)-beta-D-glucan catabolic process	gi|1002297777|ref|XP_015612312.1|/0/PREDICTED: probable endo-1,3(4)-beta-glucanase ARB_01444 [Oryza sativa Japonica Group]
TCONS_00005792	up	2.63888	LOC_Os09g21210	up	1.59025	ko02060//Phosphotransferase system (PTS);ko01120//Microbial metabolism in diverse environments;ko01100//Metabolic pathways;ko00480//Glutathione metabolism;ko00030//Pentose phosphate pathway;ko01110//Biosynthesis of secondary metabolites;ko00053//Ascorbate and aldarate metabolism	GO:0009986//cell surface	GO:0052861//glucan endo-1,3-beta-glucanase activity, C-3 substituted reducing group;GO:0042973//glucan endo-1,3-beta-D-glucosidase activity	GO:0006076//(1->3)-beta-D-glucan catabolic process	gi|1002297777|ref|XP_015612312.1|/0/PREDICTED: probable endo-1,3(4)-beta-glucanase ARB_01444 [Oryza sativa Japonica Group]
TCONS_00010868	up	2.63376	LOC_Os09g21210	up	1.59025	ko02060//Phosphotransferase system (PTS);ko01120//Microbial metabolism in diverse environments;ko01100//Metabolic pathways;ko00480//Glutathione metabolism;ko00030//Pentose phosphate pathway;ko01110//Biosynthesis of secondary metabolites;ko00053//Ascorbate and aldarate metabolism	GO:0009986//cell surface	GO:0052861//glucan endo-1,3-beta-glucanase activity, C-3 substituted reducing group;GO:0042973//glucan endo-1,3-beta-D-glucosidase activity	GO:0006076//(1->3)-beta-D-glucan catabolic process	gi|1002297777|ref|XP_015612312.1|/0/PREDICTED: probable endo-1,3(4)-beta-glucanase ARB_01444 [Oryza sativa Japonica Group]
TCONS_00056787	up	2.47695	LOC_Os09g21210	up	1.59025	ko02060//Phosphotransferase system (PTS);ko01120//Microbial metabolism in diverse environments;ko01100//Metabolic pathways;ko00480//Glutathione metabolism;ko00030//Pentose phosphate pathway;ko01110//Biosynthesis of secondary metabolites;ko00053//Ascorbate and aldarate metabolism	GO:0009986//cell surface	GO:0052861//glucan endo-1,3-beta-glucanase activity, C-3 substituted reducing group;GO:0042973//glucan endo-1,3-beta-D-glucosidase activity	GO:0006076//(1->3)-beta-D-glucan catabolic process	gi|1002297777|ref|XP_015612312.1|/0/PREDICTED: probable endo-1,3(4)-beta-glucanase ARB_01444 [Oryza sativa Japonica Group]
TCONS_00059822	up	2.24492	LOC_Os09g21210	up	1.59025	ko02060//Phosphotransferase system (PTS);ko01120//Microbial metabolism in diverse environments;ko01100//Metabolic pathways;ko00480//Glutathione metabolism;ko00030//Pentose phosphate pathway;ko01110//Biosynthesis of secondary metabolites;ko00053//Ascorbate and aldarate metabolism	GO:0009986//cell surface	GO:0052861//glucan endo-1,3-beta-glucanase activity, C-3 substituted reducing group;GO:0042973//glucan endo-1,3-beta-D-glucosidase activity	GO:0006076//(1->3)-beta-D-glucan catabolic process	gi|1002297777|ref|XP_015612312.1|/0/PREDICTED: probable endo-1,3(4)-beta-glucanase ARB_01444 [Oryza sativa Japonica Group]
TCONS_00008924	up	2.83107	LOC_Os03g22120	up	1.58372	ko00500//Starch and sucrose metabolism;ko01100//Metabolic pathways	-	GO:0016157//sucrose synthase activity	GO:0005985//sucrose metabolic process	gi|122247037|sp|Q10LP5.1|SUS4_ORYSJ;gi|108708060|gb|ABF95855.1|/0;0/RecName: Full=Sucrose synthase 4; Short=OsSUS4; AltName: Full=Sucrose-UDP glucosyltransferase 4;Sucrose synthase 2, putative, expressed [Oryza sativa Japonica Group]
TCONS_00091345	up	2.80973	LOC_Os03g22120	up	1.58372	ko00500//Starch and sucrose metabolism;ko01100//Metabolic pathways	-	GO:0016157//sucrose synthase activity	GO:0005985//sucrose metabolic process	gi|122247037|sp|Q10LP5.1|SUS4_ORYSJ;gi|108708060|gb|ABF95855.1|/0;0/RecName: Full=Sucrose synthase 4; Short=OsSUS4; AltName: Full=Sucrose-UDP glucosyltransferase 4;Sucrose synthase 2, putative, expressed [Oryza sativa Japonica Group]
TCONS_00005792	up	2.63888	LOC_Os03g22120	up	1.58372	ko00500//Starch and sucrose metabolism;ko01100//Metabolic pathways	-	GO:0016157//sucrose synthase activity	GO:0005985//sucrose metabolic process	gi|122247037|sp|Q10LP5.1|SUS4_ORYSJ;gi|108708060|gb|ABF95855.1|/0;0/RecName: Full=Sucrose synthase 4; Short=OsSUS4; AltName: Full=Sucrose-UDP glucosyltransferase 4;Sucrose synthase 2, putative, expressed [Oryza sativa Japonica Group]
TCONS_00010868	up	2.63376	LOC_Os03g22120	up	1.58372	ko00500//Starch and sucrose metabolism;ko01100//Metabolic pathways	-	GO:0016157//sucrose synthase activity	GO:0005985//sucrose metabolic process	gi|122247037|sp|Q10LP5.1|SUS4_ORYSJ;gi|108708060|gb|ABF95855.1|/0;0/RecName: Full=Sucrose synthase 4; Short=OsSUS4; AltName: Full=Sucrose-UDP glucosyltransferase 4;Sucrose synthase 2, putative, expressed [Oryza sativa Japonica Group]
TCONS_00056787	up	2.47695	LOC_Os03g22120	up	1.58372	ko00500//Starch and sucrose metabolism;ko01100//Metabolic pathways	-	GO:0016157//sucrose synthase activity	GO:0005985//sucrose metabolic process	gi|122247037|sp|Q10LP5.1|SUS4_ORYSJ;gi|108708060|gb|ABF95855.1|/0;0/RecName: Full=Sucrose synthase 4; Short=OsSUS4; AltName: Full=Sucrose-UDP glucosyltransferase 4;Sucrose synthase 2, putative, expressed [Oryza sativa Japonica Group]
TCONS_00059822	up	2.24492	LOC_Os03g22120	up	1.58372	ko00500//Starch and sucrose metabolism;ko01100//Metabolic pathways	-	GO:0016157//sucrose synthase activity	GO:0005985//sucrose metabolic process	gi|122247037|sp|Q10LP5.1|SUS4_ORYSJ;gi|108708060|gb|ABF95855.1|/0;0/RecName: Full=Sucrose synthase 4; Short=OsSUS4; AltName: Full=Sucrose-UDP glucosyltransferase 4;Sucrose synthase 2, putative, expressed [Oryza sativa Japonica Group]
TCONS_00091345	up	2.80973	LOC_Os01g04280	up	1.58244	ko04916//Melanogenesis;ko04020//Calcium signaling pathway;ko04270//Vascular smooth muscle contraction;ko05133//Pertussis;ko04744//Phototransduction;ko04626//Plant-pathogen interaction;ko04910//Insulin signaling pathway;ko04970//Salivary secretion;ko04912//GnRH signaling pathway;ko04722//Neurotrophin signaling pathway;ko05034//Alcoholism;ko05031//Amphetamine addiction;ko04745//Phototransduction - …	-	GO:0005516//calmodulin binding	GO:0006950//response to stress	gi|15528601|dbj|BAB64623.1|/0/calmodulin-binding protein -like [Oryza sativa Japonica Group]
TCONS_00005781	up	3.08006	LOC_Os01g04280	up	1.58244	ko04916//Melanogenesis;ko04020//Calcium signaling pathway;ko04270//Vascular smooth muscle contraction;ko05133//Pertussis;ko04744//Phototransduction;ko04626//Plant-pathogen interaction;ko04910//Insulin signaling pathway;ko04970//Salivary secretion;ko04912//GnRH signaling pathway;ko04722//Neurotrophin signaling pathway;ko05034//Alcoholism;ko05031//Amphetamine addiction;ko04745//Phototransduction - …	-	GO:0005516//calmodulin binding	GO:0006950//response to stress	gi|15528601|dbj|BAB64623.1|/0/calmodulin-binding protein -like [Oryza sativa Japonica Group]
TCONS_00010868	up	2.63376	LOC_Os01g04280	up	1.58244	ko04916//Melanogenesis;ko04020//Calcium signaling pathway;ko04270//Vascular smooth muscle contraction;ko05133//Pertussis;ko04744//Phototransduction;ko04626//Plant-pathogen interaction;ko04910//Insulin signaling pathway;ko04970//Salivary secretion;ko04912//GnRH signaling pathway;ko04722//Neurotrophin signaling pathway;ko05034//Alcoholism;ko05031//Amphetamine addiction;ko04745//Phototransduction - …	-	GO:0005516//calmodulin binding	GO:0006950//response to stress	gi|15528601|dbj|BAB64623.1|/0/calmodulin-binding protein -like [Oryza sativa Japonica Group]
TCONS_00059822	up	2.24492	LOC_Os01g04280	up	1.58244	ko04916//Melanogenesis;ko04020//Calcium signaling pathway;ko04270//Vascular smooth muscle contraction;ko05133//Pertussis;ko04744//Phototransduction;ko04626//Plant-pathogen interaction;ko04910//Insulin signaling pathway;ko04970//Salivary secretion;ko04912//GnRH signaling pathway;ko04722//Neurotrophin signaling pathway;ko05034//Alcoholism;ko05031//Amphetamine addiction;ko04745//Phototransduction - …	-	GO:0005516//calmodulin binding	GO:0006950//response to stress	gi|15528601|dbj|BAB64623.1|/0/calmodulin-binding protein -like [Oryza sativa Japonica Group]
TCONS_00065705	up	2.64989	LOC_Os01g60020	up	1.57802	-	GO:0005634//nucleus	GO:0003677//DNA binding	GO:0006355//regulation of transcription, DNA-templated	gi|75268448|sp|Q52QH4.1|NAC68_ORYSJ/0/RecName: Full=NAC domain-containing protein 68; Short=ONAC068
TCONS_00009978	up	1.89024	LOC_Os01g60020	up	1.57802	-	GO:0005634//nucleus	GO:0003677//DNA binding	GO:0006355//regulation of transcription, DNA-templated	gi|75268448|sp|Q52QH4.1|NAC68_ORYSJ/0/RecName: Full=NAC domain-containing protein 68; Short=ONAC068
TCONS_00089479	up	3.07091	LOC_Os07g03050	up	1.5773	-	-	-	-	gi|218199015|gb|EEC81442.1|/0/hypothetical protein OsI_24721 [Oryza sativa Indica Group]
TCONS_00065705	up	2.64989	LOC_Os07g03050	up	1.5773	-	-	-	-	gi|218199015|gb|EEC81442.1|/0/hypothetical protein OsI_24721 [Oryza sativa Indica Group]
TCONS_00059316	up	2.2842	LOC_Os10g41360	up	1.57213	ko04140//Regulation of autophagy	GO:0005634//nucleus;GO:0005737//cytoplasm	-	-	gi|78709013|gb|ABB47988.1|/0/armadillo/beta-catenin repeat family protein, putative, expressed [Oryza sativa Japonica Group]
TCONS_00081336	up	7.85557	LOC_Os04g40900	up	1.56495	-	-	GO:0003677//DNA binding;GO:0004518//nuclease activity	GO:0090305//nucleic acid phosphodiester bond hydrolysis	gi|1002262974|ref|XP_015635839.1|/0/PREDICTED: uncharacterized protein LOC4336211 isoform X1 [Oryza sativa Japonica Group]
TCONS_00009978	up	1.89024	LOC_Os07g03820	up	1.56255	ko00903//Limonene and pinene degradation;ko05142//Chagas disease (American trypanosomiasis);ko05133//Pertussis;ko05145//Toxoplasmosis;ko04626//Plant-pathogen interaction;ko00642//Ethylbenzene degradation;ko00362//Benzoate degradation;ko04722//Neurotrophin signaling pathway;ko05162//Measles;ko00240//Pyrimidine metabolism;ko00051//Fructose and mannose metabolism;ko04620//Toll-like receptor signalin…	GO:0016021//integral component of membrane;GO:0016023//cytoplasmic, membrane-bounded vesicle	GO:0030246//carbohydrate binding;GO:0005524//ATP binding;GO:0004674//protein serine/threonine kinase activity	GO:0006468//protein phosphorylation	gi|28564579|dbj|BAC57688.1|/0/putative receptor-like protein kinase [Oryza sativa Japonica Group]
TCONS_00056787	up	2.47695	LOC_Os03g60370	up	1.53963	ko00562//Inositol phosphate metabolism	GO:0005774//vacuolar membrane;GO:0016023//cytoplasmic, membrane-bounded vesicle;GO:0005783//endoplasmic reticulum	GO:0003993//acid phosphatase activity	GO:0016311//dephosphorylation	gi|113550176|dbj|BAF13619.1|/0/Os03g0818100 [Oryza sativa Japonica Group]
TCONS_00056787	up	2.47695	LOC_Os02g39570	up	1.53893	ko00660//C5-Branched dibasic acid metabolism;ko00770//Pantothenate and CoA biosynthesis;ko00290//Valine, leucine and isoleucine biosynthesis;ko01100//Metabolic pathways;ko02010//ABC transporters;ko01110//Biosynthesis of secondary metabolites;ko00650//Butanoate metabolism	-	GO:0016597//amino acid binding;GO:0003984//acetolactate synthase activity	GO:0009082//branched-chain amino acid biosynthetic process	gi|1002247102|ref|XP_015627719.1|;gi|255671076|dbj|BAF09303.2|;gi|1002247100|ref|XP_015627718.1|/0;0;0/PREDICTED: acetolactate synthase small subunit 2, chloroplastic isoform X2 [Oryza sativa Japonica Group];Os02g0608600, partial [Oryza sativa Japonica Group];PREDICTED: acetolactate synthase small subunit 2, chloroplastic isoform X1 [Oryza sativa Japonica Group]
TCONS_00070703	up	3.1046	LOC_Os04g58910	up	1.52306	ko00903//Limonene and pinene degradation;ko00642//Ethylbenzene degradation;ko00362//Benzoate degradation;ko00240//Pyrimidine metabolism;ko00051//Fructose and mannose metabolism;ko01120//Microbial metabolism in diverse environments;ko01100//Metabolic pathways;ko00627//Aminobenzoate degradation;ko00350//Tyrosine metabolism	GO:0016021//integral component of membrane	GO:0005524//ATP binding;GO:0004674//protein serine/threonine kinase activity	GO:0006468//protein phosphorylation	gi|21741125|emb|CAD41925.1|/0/OSJNBa0070M12.3 [Oryza sativa Japonica Group]
TCONS_00056787	up	2.47695	LOC_Os01g37410	up	1.52053	ko04978//Mineral absorption;ko03008//Ribosome biogenesis in eukaryotes;ko03018//RNA degradation	GO:0016021//integral component of membrane	GO:0003676//nucleic acid binding;GO:0008270//zinc ion binding	GO:0015074//DNA integration	gi|62734435|gb|AAX96544.1|/0/retrotransposon protein, putative, Ty1-copia sub-class [Oryza sativa Japonica Group]
TCONS_00059822	up	2.24492	LOC_Os01g37410	up	1.52053	ko04978//Mineral absorption;ko03008//Ribosome biogenesis in eukaryotes;ko03018//RNA degradation	GO:0016021//integral component of membrane	GO:0003676//nucleic acid binding;GO:0008270//zinc ion binding	GO:0015074//DNA integration	gi|62734435|gb|AAX96544.1|/0/retrotransposon protein, putative, Ty1-copia sub-class [Oryza sativa Japonica Group]
TCONS_00089479	up	3.07091	LOC_Os11g07440	up	1.51843	-	-	GO:0033926//glycopeptide alpha-N-acetylgalactosaminidase activity	-	gi|113644582|dbj|BAF27723.1|/0/Os11g0175400 [Oryza sativa Japonica Group]
TCONS_00065705	up	2.64989	LOC_Os11g07440	up	1.51843	-	-	GO:0033926//glycopeptide alpha-N-acetylgalactosaminidase activity	-	gi|113644582|dbj|BAF27723.1|/0/Os11g0175400 [Oryza sativa Japonica Group]
TCONS_00008924	up	2.83107	LOC_Os03g10950	up	1.51642	ko04075//Plant hormone signal transduction	-	GO:0046872//metal ion binding;GO:0004722//protein serine/threonine phosphatase activity	GO:0006470//protein dephosphorylation	gi|75244545|sp|Q8H063.1|P2C29_ORYSJ/0/RecName: Full=Probable protein phosphatase 2C 29; Short=OsPP2C29
TCONS_00091345	up	2.80973	LOC_Os03g10950	up	1.51642	ko04075//Plant hormone signal transduction	-	GO:0046872//metal ion binding;GO:0004722//protein serine/threonine phosphatase activity	GO:0006470//protein dephosphorylation	gi|75244545|sp|Q8H063.1|P2C29_ORYSJ/0/RecName: Full=Probable protein phosphatase 2C 29; Short=OsPP2C29
TCONS_00005792	up	2.63888	LOC_Os03g10950	up	1.51642	ko04075//Plant hormone signal transduction	-	GO:0046872//metal ion binding;GO:0004722//protein serine/threonine phosphatase activity	GO:0006470//protein dephosphorylation	gi|75244545|sp|Q8H063.1|P2C29_ORYSJ/0/RecName: Full=Probable protein phosphatase 2C 29; Short=OsPP2C29
TCONS_00010868	up	2.63376	LOC_Os03g10950	up	1.51642	ko04075//Plant hormone signal transduction	-	GO:0046872//metal ion binding;GO:0004722//protein serine/threonine phosphatase activity	GO:0006470//protein dephosphorylation	gi|75244545|sp|Q8H063.1|P2C29_ORYSJ/0/RecName: Full=Probable protein phosphatase 2C 29; Short=OsPP2C29
TCONS_00056787	up	2.47695	LOC_Os03g10950	up	1.51642	ko04075//Plant hormone signal transduction	-	GO:0046872//metal ion binding;GO:0004722//protein serine/threonine phosphatase activity	GO:0006470//protein dephosphorylation	gi|75244545|sp|Q8H063.1|P2C29_ORYSJ/0/RecName: Full=Probable protein phosphatase 2C 29; Short=OsPP2C29
TCONS_00059316	up	2.2842	LOC_Os03g10950	up	1.51642	ko04075//Plant hormone signal transduction	-	GO:0046872//metal ion binding;GO:0004722//protein serine/threonine phosphatase activity	GO:0006470//protein dephosphorylation	gi|75244545|sp|Q8H063.1|P2C29_ORYSJ/0/RecName: Full=Probable protein phosphatase 2C 29; Short=OsPP2C29
TCONS_00059822	up	2.24492	LOC_Os03g10950	up	1.51642	ko04075//Plant hormone signal transduction	-	GO:0046872//metal ion binding;GO:0004722//protein serine/threonine phosphatase activity	GO:0006470//protein dephosphorylation	gi|75244545|sp|Q8H063.1|P2C29_ORYSJ/0/RecName: Full=Probable protein phosphatase 2C 29; Short=OsPP2C29
TCONS_00011723	up	1.58332	LOC_Os01g71310	up	1.51439	ko00908//Zeatin biosynthesis	GO:0005615//extracellular space;GO:0016023//cytoplasmic, membrane-bounded vesicle	GO:0050660//flavin adenine dinucleotide binding;GO:0016614//oxidoreductase activity, acting on CH-OH group of donors;GO:0019139//cytokinin dehydrogenase activity	GO:0009690//cytokinin metabolic process;GO:0022900//electron transport chain	gi|75222760|sp|Q5JLP4.1|CKX4_ORYSJ/0/RecName: Full=Cytokinin dehydrogenase 4; AltName: Full=Cytokinin oxidase 4; Short=OsCKX4; Flags: Precursor
TCONS_00065705	up	2.64989	LOC_Os12g41390	up	1.50754	ko00270//Cysteine and methionine metabolism;ko01100//Metabolic pathways;ko01110//Biosynthesis of secondary metabolites	-	GO:0046872//metal ion binding;GO:0008168//methyltransferase activity	GO:0009086//methionine biosynthetic process;GO:0032259//methylation	gi|113649739|dbj|BAF30251.1|;gi|108862938|gb|ABA99259.2|;gi|937943087|dbj|BAT17999.1|/0;6.01158e-90;0/Os12g0607000 [Oryza sativa Japonica Group];Homocysteine S-methyltransferase 3, putative, expressed [Oryza sativa Japonica Group];Os12g0607000 [Oryza sativa Japonica Group]
TCONS_00008924	up	2.83107	LOC_Os11g10770	up	1.50038	ko00230//Purine metabolism;ko04623//Cytosolic DNA-sensing pathway;ko04626//Plant-pathogen interaction;ko05016//Huntington's disease;ko05169//Epstein-Barr virus infection;ko00240//Pyrimidine metabolism;ko01100//Metabolic pathways;ko03020//RNA polymerase	GO:0016023//cytoplasmic, membrane-bounded vesicle	GO:0043531//ADP binding	-	gi|77549339|gb|ABA92136.1|/0/NB-ARC domain containing protein, expressed [Oryza sativa Japonica Group]
TCONS_00091345	up	2.80973	LOC_Os11g10770	up	1.50038	ko00230//Purine metabolism;ko04623//Cytosolic DNA-sensing pathway;ko04626//Plant-pathogen interaction;ko05016//Huntington's disease;ko05169//Epstein-Barr virus infection;ko00240//Pyrimidine metabolism;ko01100//Metabolic pathways;ko03020//RNA polymerase	GO:0016023//cytoplasmic, membrane-bounded vesicle	GO:0043531//ADP binding	-	gi|77549339|gb|ABA92136.1|/0/NB-ARC domain containing protein, expressed [Oryza sativa Japonica Group]
TCONS_00005781	up	3.08006	LOC_Os11g10770	up	1.50038	ko00230//Purine metabolism;ko04623//Cytosolic DNA-sensing pathway;ko04626//Plant-pathogen interaction;ko05016//Huntington's disease;ko05169//Epstein-Barr virus infection;ko00240//Pyrimidine metabolism;ko01100//Metabolic pathways;ko03020//RNA polymerase	GO:0016023//cytoplasmic, membrane-bounded vesicle	GO:0043531//ADP binding	-	gi|77549339|gb|ABA92136.1|/0/NB-ARC domain containing protein, expressed [Oryza sativa Japonica Group]
TCONS_00005792	up	2.63888	LOC_Os11g10770	up	1.50038	ko00230//Purine metabolism;ko04623//Cytosolic DNA-sensing pathway;ko04626//Plant-pathogen interaction;ko05016//Huntington's disease;ko05169//Epstein-Barr virus infection;ko00240//Pyrimidine metabolism;ko01100//Metabolic pathways;ko03020//RNA polymerase	GO:0016023//cytoplasmic, membrane-bounded vesicle	GO:0043531//ADP binding	-	gi|77549339|gb|ABA92136.1|/0/NB-ARC domain containing protein, expressed [Oryza sativa Japonica Group]
TCONS_00010868	up	2.63376	LOC_Os11g10770	up	1.50038	ko00230//Purine metabolism;ko04623//Cytosolic DNA-sensing pathway;ko04626//Plant-pathogen interaction;ko05016//Huntington's disease;ko05169//Epstein-Barr virus infection;ko00240//Pyrimidine metabolism;ko01100//Metabolic pathways;ko03020//RNA polymerase	GO:0016023//cytoplasmic, membrane-bounded vesicle	GO:0043531//ADP binding	-	gi|77549339|gb|ABA92136.1|/0/NB-ARC domain containing protein, expressed [Oryza sativa Japonica Group]
TCONS_00056787	up	2.47695	LOC_Os11g10770	up	1.50038	ko00230//Purine metabolism;ko04623//Cytosolic DNA-sensing pathway;ko04626//Plant-pathogen interaction;ko05016//Huntington's disease;ko05169//Epstein-Barr virus infection;ko00240//Pyrimidine metabolism;ko01100//Metabolic pathways;ko03020//RNA polymerase	GO:0016023//cytoplasmic, membrane-bounded vesicle	GO:0043531//ADP binding	-	gi|77549339|gb|ABA92136.1|/0/NB-ARC domain containing protein, expressed [Oryza sativa Japonica Group]
TCONS_00059822	up	2.24492	LOC_Os11g10770	up	1.50038	ko00230//Purine metabolism;ko04623//Cytosolic DNA-sensing pathway;ko04626//Plant-pathogen interaction;ko05016//Huntington's disease;ko05169//Epstein-Barr virus infection;ko00240//Pyrimidine metabolism;ko01100//Metabolic pathways;ko03020//RNA polymerase	GO:0016023//cytoplasmic, membrane-bounded vesicle	GO:0043531//ADP binding	-	gi|77549339|gb|ABA92136.1|/0/NB-ARC domain containing protein, expressed [Oryza sativa Japonica Group]
TCONS_00056787	up	2.47695	LOC_Os06g14400	up	1.49817	ko00941//Flavonoid biosynthesis;ko01100//Metabolic pathways;ko01110//Biosynthesis of secondary metabolites;ko00402//Benzoxazinoid biosynthesis	GO:0009536//plastid	GO:0046872//metal ion binding;GO:0051213//dioxygenase activity	GO:0055114//oxidation-reduction process	gi|113595346|dbj|BAF19220.1|/0/Os06g0255100 [Oryza sativa Japonica Group]
TCONS_00011723	up	1.58332	LOC_Os08g30900	up	1.49015	-	-	GO:0042393//histone binding;GO:0008168//methyltransferase activity	GO:0032259//methylation	gi|37805966|dbj|BAC99381.1|/0/histone-lysine N-methyltransferase-like protein [Oryza sativa Japonica Group]
TCONS_00089479	up	3.07091	LOC_Os07g02490	up	1.48829	ko03013//RNA transport;ko03008//Ribosome biogenesis in eukaryotes;ko03018//RNA degradation	-	-	-	gi|1002311835|ref|XP_015619298.1|/0/PREDICTED: uncharacterized protein LOC107279689 [Oryza sativa Japonica Group]
TCONS_00065705	up	2.64989	LOC_Os07g02490	up	1.48829	ko03013//RNA transport;ko03008//Ribosome biogenesis in eukaryotes;ko03018//RNA degradation	-	-	-	gi|1002311835|ref|XP_015619298.1|/0/PREDICTED: uncharacterized protein LOC107279689 [Oryza sativa Japonica Group]
TCONS_00059316	up	2.2842	LOC_Os08g31090	up	1.48386	-	GO:0016021//integral component of membrane;GO:0016023//cytoplasmic, membrane-bounded vesicle	-	-	gi|1002289268|ref|XP_015648931.1|/4.30743e-49/PREDICTED: uncharacterized protein LOC4345515 [Oryza sativa Japonica Group]
TCONS_00065705	up	2.64989	LOC_Os01g06640	up	1.48208	-	GO:0005737//cytoplasm	GO:0046914//transition metal ion binding;GO:0046983//protein dimerization activity	GO:0046916//cellular transition metal ion homeostasis;GO:0030001//metal ion transport	gi|113531618|dbj|BAF04001.1|;gi|215741174|dbj|BAG97669.1|/1.70299e-153;2.69551e-108/Os01g0159800 [Oryza sativa Japonica Group] ;unnamed protein product [Oryza sativa Japonica Group]
TCONS_00008924	up	2.83107	LOC_Os04g05650	up	1.4725	-	-	-	-	gi|38346965|emb|CAE02262.2|/2.84129e-108/OSJNBb0049I21.1 [Oryza sativa Japonica Group]
TCONS_00091345	up	2.80973	LOC_Os04g05650	up	1.4725	-	-	-	-	gi|38346965|emb|CAE02262.2|/2.84129e-108/OSJNBb0049I21.1 [Oryza sativa Japonica Group]
TCONS_00005792	up	2.63888	LOC_Os04g05650	up	1.4725	-	-	-	-	gi|38346965|emb|CAE02262.2|/2.84129e-108/OSJNBb0049I21.1 [Oryza sativa Japonica Group]
TCONS_00010868	up	2.63376	LOC_Os04g05650	up	1.4725	-	-	-	-	gi|38346965|emb|CAE02262.2|/2.84129e-108/OSJNBb0049I21.1 [Oryza sativa Japonica Group]
TCONS_00059316	up	2.2842	LOC_Os04g05650	up	1.4725	-	-	-	-	gi|38346965|emb|CAE02262.2|/2.84129e-108/OSJNBb0049I21.1 [Oryza sativa Japonica Group]
TCONS_00059318	up	1.9494	LOC_Os04g05650	up	1.4725	-	-	-	-	gi|38346965|emb|CAE02262.2|/2.84129e-108/OSJNBb0049I21.1 [Oryza sativa Japonica Group]
TCONS_00011723	up	1.58332	LOC_Os08g06380	up	1.47153	ko00500//Starch and sucrose metabolism;ko00520//Amino sugar and nucleotide sugar metabolism;ko01100//Metabolic pathways	GO:0016021//integral component of membrane;GO:0000139//Golgi membrane	GO:0016760//cellulose synthase (UDP-forming) activity	GO:0030244//cellulose biosynthetic process;GO:0071555//cell wall organization	gi|75243376|sp|Q84UP7.1|CSLF6_ORYSJ/0/RecName: Full=Probable mixed-linked glucan synthase 6; AltName: Full=1,3;1,4-beta-D-glucan synthase 6; AltName: Full=Cellulose synthase-like protein F6; AltName: Full=OsCslF6
TCONS_00011723	up	1.58332	LOC_Os07g35290	up	1.47007	ko05142//Chagas disease (American trypanosomiasis);ko05133//Pertussis;ko05145//Toxoplasmosis;ko04626//Plant-pathogen interaction;ko04722//Neurotrophin signaling pathway;ko05162//Measles;ko04620//Toll-like receptor signaling pathway;ko05164//Influenza A;ko05140//Leishmaniasis;ko05152//Tuberculosis;ko04064//NF-kappa B signaling pathway;ko04210//Apoptosis	GO:0009506//plasmodesma;GO:0005886//plasma membrane;GO:0016021//integral component of membrane	GO:0005524//ATP binding;GO:0004674//protein serine/threonine kinase activity	GO:0006952//defense response;GO:0006468//protein phosphorylation	gi|1002285061|ref|XP_015646829.1|/0/PREDICTED: putative receptor-like protein kinase At4g00960 [Oryza sativa Japonica Group]
TCONS_00056787	up	2.47695	LOC_Os02g55560	up	1.46779	ko04075//Plant hormone signal transduction	-	GO:0003677//DNA binding;GO:0004722//protein serine/threonine phosphatase activity;GO:0061630//ubiquitin protein ligase activity;GO:0008270//zinc ion binding	GO:0042787//protein ubiquitination involved in ubiquitin-dependent protein catabolic process;GO:0000209//protein polyubiquitination;GO:0043161//proteasome-mediated ubiquitin-dependent protein catabolic process;GO:0006470//protein dephosphorylation	gi|75289687|sp|Q69QZ0.1|P2C27_ORYSJ/0/RecName: Full=Probable protein phosphatase 2C 27; Short=OsPP2C27
TCONS_00065705	up	2.64989	LOC_Os04g10530	up	1.46665	ko01100//Metabolic pathways;ko00970//Aminoacyl-tRNA biosynthesis	GO:0016023//cytoplasmic, membrane-bounded vesicle	GO:0016884//carbon-nitrogen ligase activity, with glutamine as amido-N-donor	-	gi|255675189|dbj|BAF14102.2|/0/Os04g0184100, partial [Oryza sativa Japonica Group]
TCONS_00009978	up	1.89024	LOC_Os04g10530	up	1.46665	ko01100//Metabolic pathways;ko00970//Aminoacyl-tRNA biosynthesis	GO:0016023//cytoplasmic, membrane-bounded vesicle	GO:0016884//carbon-nitrogen ligase activity, with glutamine as amido-N-donor	-	gi|255675189|dbj|BAF14102.2|/0/Os04g0184100, partial [Oryza sativa Japonica Group]
TCONS_00070703	up	3.1046	LOC_Os08g36480	up	1.45334	ko00910//Nitrogen metabolism;ko00591//Linoleic acid metabolism;ko01120//Microbial metabolism in diverse environments;ko01100//Metabolic pathways;ko00920//Sulfur metabolism	-	GO:0009703//nitrate reductase (NADH) activity;GO:0050464//nitrate reductase (NADPH) activity;GO:0030151//molybdenum ion binding;GO:0020037//heme binding;GO:0043546//molybdopterin cofactor binding	GO:0006809//nitric oxide biosynthetic process;GO:0042128//nitrate assimilation;GO:0022900//electron transport chain	gi|116256153|sp|P16081.3|NIA1_ORYSJ/0/RecName: Full=Nitrate reductase [NADH] 1; Short=NR1
TCONS_00065705	up	2.64989	LOC_Os06g44010	up	1.45223	ko04626//Plant-pathogen interaction	GO:0005634//nucleus	GO:0003700//transcription factor activity, sequence-specific DNA binding	GO:0006952//defense response;GO:0009685//gibberellin metabolic process	gi|1002274529|ref|XP_015641578.1|/0/PREDICTED: probable WRKY transcription factor 60 [Oryza sativa Japonica Group]
TCONS_00009978	up	1.89024	LOC_Os06g44010	up	1.45223	ko04626//Plant-pathogen interaction	GO:0005634//nucleus	GO:0003700//transcription factor activity, sequence-specific DNA binding	GO:0006952//defense response;GO:0009685//gibberellin metabolic process	gi|1002274529|ref|XP_015641578.1|/0/PREDICTED: probable WRKY transcription factor 60 [Oryza sativa Japonica Group]
TCONS_00089479	up	3.07091	LOC_Os07g18120	up	1.44974	ko01100//Metabolic pathways;ko00380//Tryptophan metabolism;ko00906//Carotenoid biosynthesis;ko01110//Biosynthesis of secondary metabolites	GO:0005829//cytosol	GO:0051537//2 iron, 2 sulfur cluster binding;GO:0009055//electron carrier activity;GO:0016614//oxidoreductase activity, acting on CH-OH group of donors;GO:0016903//oxidoreductase activity, acting on the aldehyde or oxo group of donors;GO:0004854//xanthine dehydrogenase activity;GO:0050660//flavin adenine dinucleotide binding;GO:0005506//iron ion binding	GO:0055114//oxidation-reduction process;GO:0009115//xanthine catabolic process	gi|1002286873|ref|XP_015647742.1|/0/PREDICTED: putative aldehyde oxidase-like protein isoform X1 [Oryza sativa Japonica Group]
TCONS_00081336	up	7.85557	LOC_Os07g18120	up	1.44974	ko01100//Metabolic pathways;ko00380//Tryptophan metabolism;ko00906//Carotenoid biosynthesis;ko01110//Biosynthesis of secondary metabolites	GO:0005829//cytosol	GO:0051537//2 iron, 2 sulfur cluster binding;GO:0009055//electron carrier activity;GO:0016614//oxidoreductase activity, acting on CH-OH group of donors;GO:0016903//oxidoreductase activity, acting on the aldehyde or oxo group of donors;GO:0004854//xanthine dehydrogenase activity;GO:0050660//flavin adenine dinucleotide binding;GO:0005506//iron ion binding	GO:0055114//oxidation-reduction process;GO:0009115//xanthine catabolic process	gi|1002286873|ref|XP_015647742.1|/0/PREDICTED: putative aldehyde oxidase-like protein isoform X1 [Oryza sativa Japonica Group]
TCONS_00059316	up	2.2842	LOC_Os03g50280	up	1.44334	-	GO:0005737//cytoplasm;GO:0005634//nucleus	GO:0017089//glycolipid transporter activity;GO:0051861//glycolipid binding	GO:0046836//glycolipid transport	gi|108710709|gb|ABF98504.1|/1.50085e-154/expressed protein [Oryza sativa Japonica Group]
TCONS_00081336	up	7.85557	LOC_Os03g50280	up	1.44334	-	GO:0005737//cytoplasm;GO:0005634//nucleus	GO:0017089//glycolipid transporter activity;GO:0051861//glycolipid binding	GO:0046836//glycolipid transport	gi|108710709|gb|ABF98504.1|/1.50085e-154/expressed protein [Oryza sativa Japonica Group]
TCONS_00008924	up	2.83107	LOC_Os04g42770	up	1.43955	-	-	-	-	gi|937915067|dbj|BAS89986.1|;gi|116310317|emb|CAH67333.1|/0;0/Os04g0506900 [Oryza sativa Japonica Group];OSIGBa0157A06.2 [Oryza sativa Indica Group]
TCONS_00091345	up	2.80973	LOC_Os04g42770	up	1.43955	-	-	-	-	gi|937915067|dbj|BAS89986.1|;gi|116310317|emb|CAH67333.1|/0;0/Os04g0506900 [Oryza sativa Japonica Group];OSIGBa0157A06.2 [Oryza sativa Indica Group]
TCONS_00005792	up	2.63888	LOC_Os04g42770	up	1.43955	-	-	-	-	gi|937915067|dbj|BAS89986.1|;gi|116310317|emb|CAH67333.1|/0;0/Os04g0506900 [Oryza sativa Japonica Group];OSIGBa0157A06.2 [Oryza sativa Indica Group]
TCONS_00010868	up	2.63376	LOC_Os04g42770	up	1.43955	-	-	-	-	gi|937915067|dbj|BAS89986.1|;gi|116310317|emb|CAH67333.1|/0;0/Os04g0506900 [Oryza sativa Japonica Group];OSIGBa0157A06.2 [Oryza sativa Indica Group]
TCONS_00059316	up	2.2842	LOC_Os04g42770	up	1.43955	-	-	-	-	gi|937915067|dbj|BAS89986.1|;gi|116310317|emb|CAH67333.1|/0;0/Os04g0506900 [Oryza sativa Japonica Group];OSIGBa0157A06.2 [Oryza sativa Indica Group]
TCONS_00059822	up	2.24492	LOC_Os04g42770	up	1.43955	-	-	-	-	gi|937915067|dbj|BAS89986.1|;gi|116310317|emb|CAH67333.1|/0;0/Os04g0506900 [Oryza sativa Japonica Group];OSIGBa0157A06.2 [Oryza sativa Indica Group]
TCONS_00059318	up	1.9494	LOC_Os04g42770	up	1.43955	-	-	-	-	gi|937915067|dbj|BAS89986.1|;gi|116310317|emb|CAH67333.1|/0;0/Os04g0506900 [Oryza sativa Japonica Group];OSIGBa0157A06.2 [Oryza sativa Indica Group]
TCONS_00089479	up	3.07091	LOC_Os03g03700	up	1.43713	-	GO:0016021//integral component of membrane;GO:0005886//plasma membrane	GO:0005516//calmodulin binding	GO:0006952//defense response;GO:0008219//cell death;GO:0009607//response to biotic stimulus	gi|113547316|dbj|BAF10759.1|;gi|1002254455|ref|XP_015631488.1|/0;0/Os03g0129100 [Oryza sativa Japonica Group];PREDICTED: MLO protein homolog 1 isoform X2 [Oryza sativa Japonica Group]
TCONS_00065705	up	2.64989	LOC_Os03g03700	up	1.43713	-	GO:0016021//integral component of membrane;GO:0005886//plasma membrane	GO:0005516//calmodulin binding	GO:0006952//defense response;GO:0008219//cell death;GO:0009607//response to biotic stimulus	gi|113547316|dbj|BAF10759.1|;gi|1002254455|ref|XP_015631488.1|/0;0/Os03g0129100 [Oryza sativa Japonica Group];PREDICTED: MLO protein homolog 1 isoform X2 [Oryza sativa Japonica Group]
TCONS_00056787	up	2.47695	LOC_Os01g59740	up	1.43323	-	GO:0016021//integral component of membrane;GO:0009536//plastid	-	-	gi|255673805|dbj|BAF06510.2|/3.40791e-151/Os01g0812900 [Oryza sativa Japonica Group]
TCONS_00056787	up	2.47695	LOC_Os04g41570	up	1.43017	-	GO:0005634//nucleus	GO:0001228//transcriptional activator activity, RNA polymerase II transcription regulatory region sequence-specific binding;GO:0001046//core promoter sequence-specific DNA binding;GO:0046983//protein dimerization activity	GO:0045944//positive regulation of transcription from RNA polymerase II promoter	gi|21740790|emb|CAD41535.1|/9.66984e-115/OSJNBb0091E11.4 [Oryza sativa Japonica Group]
TCONS_00059822	up	2.24492	LOC_Os04g41570	up	1.43017	-	GO:0005634//nucleus	GO:0001228//transcriptional activator activity, RNA polymerase II transcription regulatory region sequence-specific binding;GO:0001046//core promoter sequence-specific DNA binding;GO:0046983//protein dimerization activity	GO:0045944//positive regulation of transcription from RNA polymerase II promoter	gi|21740790|emb|CAD41535.1|/9.66984e-115/OSJNBb0091E11.4 [Oryza sativa Japonica Group]
TCONS_00070703	up	3.1046	LOC_Os03g19520	up	1.4288	-	GO:0009536//plastid	-	-	gi|108707753|gb|ABF95548.1|;gi|1002257332|ref|XP_015632984.1|;gi|113548374|dbj|BAF11817.1|/0;0;0/cyclin, putative, expressed [Oryza sativa Japonica Group];PREDICTED: uncharacterized protein LOC4332616 isoform X1 [Oryza sativa Japonica Group];Os03g0308200 [Oryza sativa Japonica Group]
TCONS_00070703	up	3.1046	LOC_Os11g03240	up	1.42182	-	GO:0016021//integral component of membrane	GO:0015297//antiporter activity;GO:0015238//drug transmembrane transporter activity	GO:0006855//drug transmembrane transport	gi|77548508|gb|ABA91305.1|/0/MATE efflux family protein, expressed [Oryza sativa Japonica Group]
TCONS_00089479	up	3.07091	LOC_Os01g51920	up	1.41976	ko00564//Glycerophospholipid metabolism;ko01100//Metabolic pathways	-	GO:0003700//transcription factor activity, sequence-specific DNA binding;GO:0003677//DNA binding;GO:0016301//kinase activity	GO:0006355//regulation of transcription, DNA-templated;GO:0016310//phosphorylation	gi|113533604|dbj|BAF05987.1|/0/Os01g0717000 [Oryza sativa Japonica Group]
TCONS_00065705	up	2.64989	LOC_Os01g51920	up	1.41976	ko00564//Glycerophospholipid metabolism;ko01100//Metabolic pathways	-	GO:0003700//transcription factor activity, sequence-specific DNA binding;GO:0003677//DNA binding;GO:0016301//kinase activity	GO:0006355//regulation of transcription, DNA-templated;GO:0016310//phosphorylation	gi|113533604|dbj|BAF05987.1|/0/Os01g0717000 [Oryza sativa Japonica Group]
TCONS_00059316	up	2.2842	LOC_Os02g51350	up	1.4124	-	-	-	-	gi|46390943|dbj|BAD16457.1|/0/kelch repeat-containing F-box-like [Oryza sativa Japonica Group]
TCONS_00059318	up	1.9494	LOC_Os02g51350	up	1.4124	-	-	-	-	gi|46390943|dbj|BAD16457.1|/0/kelch repeat-containing F-box-like [Oryza sativa Japonica Group]
TCONS_00011723	up	1.58332	LOC_Os09g29940	up	1.41158	-	GO:0016021//integral component of membrane;GO:0005737//cytoplasm	-	-	gi|1002293808|ref|XP_015651233.1|;gi|215706389|dbj|BAG93245.1|/0;0/PREDICTED: uncharacterized protein At1g04910 [Oryza sativa Japonica Group];unnamed protein product [Oryza sativa Japonica Group]
TCONS_00065705	up	2.64989	LOC_Os06g46284	up	1.40999	ko00052//Galactose metabolism;ko00740//Riboflavin metabolism;ko00500//Starch and sucrose metabolism;ko01100//Metabolic pathways	GO:0009505//plant-type cell wall;GO:0005773//vacuole;GO:0048046//apoplast;GO:0016023//cytoplasmic, membrane-bounded vesicle	GO:0032450//maltose alpha-glucosidase activity;GO:0030246//carbohydrate binding;GO:0004558//alpha-1,4-glucosidase activity	GO:0000023//maltose metabolic process	gi|75114635|sp|Q653V7.1|AGLU_ORYSJ/0/RecName: Full=Probable alpha-glucosidase Os06g0675700; AltName: Full=Maltase; Flags: Precursor
[truncated: 314 more rows]
