# Supplementary material for: Transcriptome Analysis of Rice Reveals the lncRNA–mRNA Regulatory Network in Response to Rice Black-Streaked Dwarf Virus Infection
Source: Viruses. 2020 Aug 27;12(9):951. doi: 10.3390/v12090951 (PMC7552052; doi:10.3390/v12090951)
Supplement: Supplementary file 1 [file viruses-12-00951-s001.zip › Table S11. Detail information of the DElncRNA-DEmRNA co-expressed pairs involved in the plant-pathogen interaction pathway.xlsx]

## Sheet: Sheet1
lncRNA_ID	Up-Down-Regulation(RBSDV/CK)	log2Ratio(RBSDV/CK)	Gene_ID	Up-Down-Regulation(RBSDV/CK)	log2Ratio(RBSDV/CK)	Pathway	GO Component	GO Function	GO Process	Blast nr
TCONS_00081336	up	7.85557	LOC_Os11g44430	up	1.96939	ko05142//Chagas disease (American trypanosomiasis);ko05133//Pertussis;ko05145//Toxoplasmosis;ko04626//Plant-pathogen interaction;ko04722//Neurotrophin signaling pathway;ko05162//Measles;ko04620//Toll-like receptor signaling pathway;ko05164//Influenza A;ko05140//Leishmaniasis;ko05152//Tuberculosis;ko04064//NF-kappa B signaling pathway;ko04210//Apoptosis	-	GO:0005524//ATP binding;GO:0004674//protein serine/threonine kinase activity	GO:0006468//protein phosphorylation	gi|77552359|gb|ABA95156.1|/0/Protein kinase domain containing protein, expressed [Oryza sativa Japonica Group]
TCONS_00081336	up	7.85557	LOC_Os01g12430	up	1.95235	ko00903//Limonene and pinene degradation;ko05142//Chagas disease (American trypanosomiasis);ko05133//Pertussis;ko05145//Toxoplasmosis;ko04626//Plant-pathogen interaction;ko00642//Ethylbenzene degradation;ko00362//Benzoate degradation;ko04075//Plant hormone signal transduction;ko04722//Neurotrophin signaling pathway;ko05162//Measles;ko00240//Pyrimidine metabolism;ko00051//Fructose and mannose meta…	GO:0016021//integral component of membrane;GO:0016023//cytoplasmic, membrane-bounded vesicle;GO:0005886//plasma membrane	GO:0004674//protein serine/threonine kinase activity;GO:0005524//ATP binding	GO:0006468//protein phosphorylation;GO:0048544//recognition of pollen	gi|255673013|dbj|BAF04363.2|/0/Os01g0224000 [Oryza sativa Japonica Group]
TCONS_00081336	up	7.85557	LOC_Os02g17400	up	1.90635	ko04626//Plant-pathogen interaction	GO:0016021//integral component of membrane;GO:0016023//cytoplasmic, membrane-bounded vesicle	-	-	gi|1002242802|ref|XP_015625623.1|/0/PREDICTED: probable LRR receptor-like serine/threonine-protein kinase At4g36180 [Oryza sativa Japonica Group]
TCONS_00081336	up	7.85557	LOC_Os03g20840	up	1.62208	ko00230//Purine metabolism;ko04623//Cytosolic DNA-sensing pathway;ko04626//Plant-pathogen interaction;ko05016//Huntington's disease;ko05169//Epstein-Barr virus infection;ko00240//Pyrimidine metabolism;ko01100//Metabolic pathways;ko03020//RNA polymerase	-	GO:0043531//ADP binding	-	gi|108707907|gb|ABF95702.1|/0/NB-ARC domain containing protein, expressed [Oryza sativa Japonica Group]
TCONS_00081336	up	7.85557	LOC_Os04g52840	up	1.05873	ko05142//Chagas disease (American trypanosomiasis);ko05133//Pertussis;ko05145//Toxoplasmosis;ko04626//Plant-pathogen interaction;ko04722//Neurotrophin signaling pathway;ko05162//Measles;ko04620//Toll-like receptor signaling pathway;ko05164//Influenza A;ko05140//Leishmaniasis;ko05152//Tuberculosis;ko04064//NF-kappa B signaling pathway;ko04210//Apoptosis	GO:0005886//plasma membrane;GO:0016021//integral component of membrane;GO:0016023//cytoplasmic, membrane-bounded vesicle	GO:0005524//ATP binding;GO:0004674//protein serine/threonine kinase activity	GO:0006468//protein phosphorylation	gi|38344329|emb|CAD41745.2|/0/OSJNBa0058K23.11 [Oryza sativa Japonica Group]
TCONS_00081336	up	7.85557	LOC_Os11g36200	up	2.1153	ko04626//Plant-pathogen interaction	-	GO:0016301//kinase activity	GO:0016310//phosphorylation	gi|1002303385|ref|XP_015615078.1|/0/PREDICTED: putative receptor-like protein kinase At3g47110 isoform X1 [Oryza sativa Japonica Group]
TCONS_00008316	up	6.93456	LOC_Os04g48930	up	5.48432	ko04626//Plant-pathogen interaction	GO:0016020//membrane	-	-	gi|116309691|emb|CAH66739.1|;gi|937915711|dbj|BAS90630.1|/0;0/H0404F02.15 [Oryza sativa Indica Group];Os04g0578600, partial [Oryza sativa Japonica Group]
TCONS_00008316	up	6.93456	LOC_Os08g27170	up	2.32357	ko04916//Melanogenesis;ko04020//Calcium signaling pathway;ko04270//Vascular smooth muscle contraction;ko05133//Pertussis;ko04744//Phototransduction;ko04626//Plant-pathogen interaction;ko04910//Insulin signaling pathway;ko04970//Salivary secretion;ko04912//GnRH signaling pathway;ko04722//Neurotrophin signaling pathway;ko05034//Alcoholism;ko05031//Amphetamine addiction;ko04745//Phototransduction - …	-	GO:0005516//calmodulin binding	GO:0006950//response to stress	gi|1002289249|ref|XP_015648922.1|/0/PREDICTED: protein SAR DEFICIENT 1-like [Oryza sativa Japonica Group]
TCONS_00070703	up	3.1046	LOC_Os03g57450	up	1.78825	ko05145//Toxoplasmosis;ko04626//Plant-pathogen interaction	GO:0005737//cytoplasm;GO:0005634//nucleus;GO:0005886//plasma membrane	GO:0005516//calmodulin binding;GO:0005509//calcium ion binding;GO:0009931//calcium-dependent protein serine/threonine kinase activity;GO:0005524//ATP binding;GO:0004683//calmodulin-dependent protein kinase activity	GO:0018105//peptidyl-serine phosphorylation;GO:0046777//protein autophosphorylation;GO:0035556//intracellular signal transduction;GO:0009738//abscisic acid-activated signaling pathway	gi|113549974|dbj|BAF13417.1|/0/Os03g0788500 [Oryza sativa Japonica Group]
TCONS_00070703	up	3.1046	LOC_Os03g04110	up	1.35947	ko04626//Plant-pathogen interaction	GO:0016021//integral component of membrane;GO:0016023//cytoplasmic, membrane-bounded vesicle;GO:0005886//plasma membrane	GO:0008061//chitin binding;GO:0043621//protein self-association	GO:0006952//defense response	gi|75244901|sp|Q8H8C7.1|CEBIP_ORYSJ/0/RecName: Full=Chitin elicitor-binding protein; Short=CEBiP; Flags: Precursor
TCONS_00070703	up	3.1046	LOC_Os09g34150	up	1.30801	ko04626//Plant-pathogen interaction	-	GO:0043531//ADP binding	-	gi|937934060|dbj|BAT08975.1|;gi|1002297616|ref|XP_015612238.1|/0;0/Os09g0517100 [Oryza sativa Japonica Group];PREDICTED: disease resistance protein RPM1 isoform X3 [Oryza sativa Japonica Group]
TCONS_00070703	up	3.1046	LOC_Os08g16120	up	2.22499	ko04626//Plant-pathogen interaction	GO:0016023//cytoplasmic, membrane-bounded vesicle;GO:0009536//plastid	GO:0043531//ADP binding	-	gi|113623361|dbj|BAF23306.1|/0/Os08g0261000 [Oryza sativa Japonica Group]
TCONS_00005781	up	3.08006	LOC_Os04g48930	up	5.48432	ko04626//Plant-pathogen interaction	GO:0016020//membrane	-	-	gi|116309691|emb|CAH66739.1|;gi|937915711|dbj|BAS90630.1|/0;0/H0404F02.15 [Oryza sativa Indica Group];Os04g0578600, partial [Oryza sativa Japonica Group]
TCONS_00005781	up	3.08006	LOC_Os01g04280	up	1.58244	ko04916//Melanogenesis;ko04020//Calcium signaling pathway;ko04270//Vascular smooth muscle contraction;ko05133//Pertussis;ko04744//Phototransduction;ko04626//Plant-pathogen interaction;ko04910//Insulin signaling pathway;ko04970//Salivary secretion;ko04912//GnRH signaling pathway;ko04722//Neurotrophin signaling pathway;ko05034//Alcoholism;ko05031//Amphetamine addiction;ko04745//Phototransduction - …	-	GO:0005516//calmodulin binding	GO:0006950//response to stress	gi|15528601|dbj|BAB64623.1|/0/calmodulin-binding protein -like [Oryza sativa Japonica Group]
TCONS_00005781	up	3.08006	LOC_Os11g10770	up	1.50038	ko00230//Purine metabolism;ko04623//Cytosolic DNA-sensing pathway;ko04626//Plant-pathogen interaction;ko05016//Huntington's disease;ko05169//Epstein-Barr virus infection;ko00240//Pyrimidine metabolism;ko01100//Metabolic pathways;ko03020//RNA polymerase	GO:0016023//cytoplasmic, membrane-bounded vesicle	GO:0043531//ADP binding	-	gi|77549339|gb|ABA92136.1|/0/NB-ARC domain containing protein, expressed [Oryza sativa Japonica Group]
TCONS_00005781	up	3.08006	LOC_Os09g34160	up	2.78303	ko04626//Plant-pathogen interaction	-	-	-	gi|937934061|dbj|BAT08976.1|/0/Os09g0517200 [Oryza sativa Japonica Group]
TCONS_00005781	up	3.08006	LOC_Os03g08550	up	3.10456	ko04626//Plant-pathogen interaction	GO:0016021//integral component of membrane;GO:0016023//cytoplasmic, membrane-bounded vesicle	GO:0004672//protein kinase activity;GO:0005524//ATP binding	GO:0006468//protein phosphorylation	gi|1002848586|ref|XP_006649512.2|/0/PREDICTED: protein STRUBBELIG-RECEPTOR FAMILY 7-like [Oryza brachyantha]
TCONS_00089479	up	3.07091	LOC_Os08g10310	up	5.21338	ko05142//Chagas disease (American trypanosomiasis);ko05133//Pertussis;ko05145//Toxoplasmosis;ko04626//Plant-pathogen interaction;ko04075//Plant hormone signal transduction;ko04722//Neurotrophin signaling pathway;ko05162//Measles;ko04620//Toll-like receptor signaling pathway;ko05164//Influenza A;ko05140//Leishmaniasis;ko05152//Tuberculosis;ko04064//NF-kappa B signaling pathway;ko04210//Apoptosis	GO:0005886//plasma membrane;GO:0016021//integral component of membrane;GO:0016023//cytoplasmic, membrane-bounded vesicle;GO:0005739//mitochondrion	GO:0005524//ATP binding;GO:0004674//protein serine/threonine kinase activity	GO:0006468//protein phosphorylation	gi|1002291248|ref|XP_015649962.1|;gi|113623192|dbj|BAF23137.1|/0;0/PREDICTED: probable LRR receptor-like serine/threonine-protein kinase At1g56140 isoform X2 [Oryza sativa Japonica Group];Os08g0203400 [Oryza sativa Japonica Group]
TCONS_00089479	up	3.07091	LOC_Os07g03710	up	3.90007	ko04626//Plant-pathogen interaction;ko04075//Plant hormone signal transduction	GO:0005576//extracellular region;GO:0016023//cytoplasmic, membrane-bounded vesicle	-	-	gi|937924997|dbj|BAS99913.1|/1.00022e-91/Os07g0129200, partial [Oryza sativa Japonica Group]
TCONS_00089479	up	3.07091	LOC_Os01g12420	up	4.83141	ko05142//Chagas disease (American trypanosomiasis);ko05133//Pertussis;ko05145//Toxoplasmosis;ko04626//Plant-pathogen interaction;ko04075//Plant hormone signal transduction;ko04722//Neurotrophin signaling pathway;ko05162//Measles;ko04620//Toll-like receptor signaling pathway;ko05164//Influenza A;ko05140//Leishmaniasis;ko05152//Tuberculosis;ko04064//NF-kappa B signaling pathway;ko04210//Apoptosis	GO:0016021//integral component of membrane;GO:0016023//cytoplasmic, membrane-bounded vesicle;GO:0005886//plasma membrane	GO:0004674//protein serine/threonine kinase activity;GO:0005524//ATP binding	GO:0006468//protein phosphorylation;GO:0048544//recognition of pollen	gi|113531979|dbj|BAF04362.1|/0/Os01g0223900 [Oryza sativa Japonica Group]
TCONS_00089479	up	3.07091	LOC_Os10g20120	up	3.05748	ko05142//Chagas disease (American trypanosomiasis);ko05133//Pertussis;ko05145//Toxoplasmosis;ko04626//Plant-pathogen interaction;ko04075//Plant hormone signal transduction;ko04722//Neurotrophin signaling pathway;ko05162//Measles;ko04620//Toll-like receptor signaling pathway;ko05164//Influenza A;ko05140//Leishmaniasis;ko05152//Tuberculosis;ko04064//NF-kappa B signaling pathway;ko04210//Apoptosis	GO:0005886//plasma membrane;GO:0016021//integral component of membrane	GO:0030246//carbohydrate binding;GO:0005524//ATP binding;GO:0004674//protein serine/threonine kinase activity	GO:0048544//recognition of pollen;GO:0006468//protein phosphorylation	gi|31431340|gb|AAP53135.1|/0/D-mannose binding lectin family protein, expressed [Oryza sativa Japonica Group]
TCONS_00089479	up	3.07091	LOC_Os03g08320	up	2.34133	ko04626//Plant-pathogen interaction;ko04075//Plant hormone signal transduction	GO:0005634//nucleus	GO:0003714//transcription corepressor activity	GO:1903507//negative regulation of nucleic acid-templated transcription;GO:2000022//regulation of jasmonic acid mediated signaling pathway;GO:0009611//response to wounding;GO:0031347//regulation of defense response;GO:0006351//transcription, DNA-templated	gi|75150198|sp|Q8GRS2.1|TI11C_ORYSJ/3.02982e-111/RecName: Full=Protein TIFY 11c; Short=OsTIFY11c; AltName: Full=Jasmonate ZIM domain-containing protein 11; Short=OsJAZ11; AltName: Full=OsJAZ2
TCONS_00089479	up	3.07091	LOC_Os05g39720	up	2.58547	ko04626//Plant-pathogen interaction	GO:0009536//plastid	-	-	gi|46394394|tpg|DAA05135.1|/0/TPA_inf: WRKY transcription factor 70 [Oryza sativa (indica cultivar-group)] [Oryza sativa Indica Group]
TCONS_00089479	up	3.07091	LOC_Os01g06730	up	3.23876	ko04626//Plant-pathogen interaction	GO:0016021//integral component of membrane;GO:0016023//cytoplasmic, membrane-bounded vesicle	-	-	gi|1002227256|ref|XP_015630998.1|/0/PREDICTED: receptor-like protein 12 [Oryza sativa Japonica Group]
TCONS_00089479	up	3.07091	LOC_Os01g28500	up	6.58452	ko04626//Plant-pathogen interaction;ko04075//Plant hormone signal transduction	GO:0005576//extracellular region;GO:0016023//cytoplasmic, membrane-bounded vesicle	-	GO:0006952//defense response;GO:0009607//response to biotic stimulus	gi|113532622|dbj|BAF05005.1|/2.75482e-123/Os01g0382400 [Oryza sativa Japonica Group]
TCONS_00089479	up	3.07091	LOC_Os09g26780	up	2.12255	ko04626//Plant-pathogen interaction;ko04075//Plant hormone signal transduction	GO:0005829//cytosol;GO:0005634//nucleus	GO:0003714//transcription corepressor activity	GO:1903507//negative regulation of nucleic acid-templated transcription;GO:2000022//regulation of jasmonic acid mediated signaling pathway;GO:0009611//response to wounding;GO:0006355//regulation of transcription, DNA-templated;GO:0031347//regulation of defense response	gi|75118454|sp|Q69P94.1|TI10C_ORYSJ/3.53152e-132/RecName: Full=Protein TIFY 10c; Short=OsTIFY10c; AltName: Full=Jasmonate ZIM domain-containing protein 8; Short=OsJAZ8; AltName: Full=OsJAZ7
TCONS_00089479	up	3.07091	LOC_Os04g41380	up	2.3587	ko00230//Purine metabolism;ko04623//Cytosolic DNA-sensing pathway;ko04626//Plant-pathogen interaction;ko05016//Huntington's disease;ko05169//Epstein-Barr virus infection;ko00240//Pyrimidine metabolism;ko01100//Metabolic pathways;ko03020//RNA polymerase	-	-	-	gi|32483317|emb|CAE02492.1|/0/OSJNBa0076N16.15 [Oryza sativa Japonica Group]
TCONS_00089479	up	3.07091	LOC_Os08g40270	up	3.48466	ko00903//Limonene and pinene degradation;ko05142//Chagas disease (American trypanosomiasis);ko05133//Pertussis;ko05145//Toxoplasmosis;ko04626//Plant-pathogen interaction;ko00642//Ethylbenzene degradation;ko00362//Benzoate degradation;ko04075//Plant hormone signal transduction;ko04722//Neurotrophin signaling pathway;ko05162//Measles;ko00240//Pyrimidine metabolism;ko00051//Fructose and mannose meta…	-	GO:0005488;GO:0016301//kinase activity	-	gi|1002290014|ref|XP_015649334.1|/0/PREDICTED: uncharacterized protein LOC4346025 [Oryza sativa Japonica Group]
TCONS_00089479	up	3.07091	LOC_Os01g12430	up	1.95235	ko00903//Limonene and pinene degradation;ko05142//Chagas disease (American trypanosomiasis);ko05133//Pertussis;ko05145//Toxoplasmosis;ko04626//Plant-pathogen interaction;ko00642//Ethylbenzene degradation;ko00362//Benzoate degradation;ko04075//Plant hormone signal transduction;ko04722//Neurotrophin signaling pathway;ko05162//Measles;ko00240//Pyrimidine metabolism;ko00051//Fructose and mannose meta…	GO:0016021//integral component of membrane;GO:0016023//cytoplasmic, membrane-bounded vesicle;GO:0005886//plasma membrane	GO:0004674//protein serine/threonine kinase activity;GO:0005524//ATP binding	GO:0006468//protein phosphorylation;GO:0048544//recognition of pollen	gi|255673013|dbj|BAF04363.2|/0/Os01g0224000 [Oryza sativa Japonica Group]
TCONS_00089479	up	3.07091	LOC_Os12g36110	up	1.79675	ko04916//Melanogenesis;ko04020//Calcium signaling pathway;ko04270//Vascular smooth muscle contraction;ko05133//Pertussis;ko04744//Phototransduction;ko04626//Plant-pathogen interaction;ko04910//Insulin signaling pathway;ko04970//Salivary secretion;ko04912//GnRH signaling pathway;ko04722//Neurotrophin signaling pathway;ko05034//Alcoholism;ko05031//Amphetamine addiction;ko04745//Phototransduction - …	-	GO:0005516//calmodulin binding	GO:0006950//response to stress	gi|1002314498|ref|XP_015620621.1|/0/PREDICTED: calmodulin-binding protein 60 D isoform X2 [Oryza sativa Japonica Group]
TCONS_00089479	up	3.07091	LOC_Os03g20840	up	1.62208	ko00230//Purine metabolism;ko04623//Cytosolic DNA-sensing pathway;ko04626//Plant-pathogen interaction;ko05016//Huntington's disease;ko05169//Epstein-Barr virus infection;ko00240//Pyrimidine metabolism;ko01100//Metabolic pathways;ko03020//RNA polymerase	-	GO:0043531//ADP binding	-	gi|108707907|gb|ABF95702.1|/0/NB-ARC domain containing protein, expressed [Oryza sativa Japonica Group]
TCONS_00089479	up	3.07091	LOC_Os03g53020	up	1.10958	ko04626//Plant-pathogen interaction;ko04075//Plant hormone signal transduction	GO:0005634//nucleus	GO:0046983//protein dimerization activity	GO:0006351//transcription, DNA-templated	gi|75295028|sp|Q75KV9.1|BH148_ORYSJ/2.59534e-151/RecName: Full=Transcription factor BHLH148; AltName: Full=Basic helix-loop-helix protein 148; Short=OsbHLH148; AltName: Full=bHLH transcription factor bHLH148
TCONS_00089479	up	3.07091	LOC_Os04g52840	up	1.05873	ko05142//Chagas disease (American trypanosomiasis);ko05133//Pertussis;ko05145//Toxoplasmosis;ko04626//Plant-pathogen interaction;ko04722//Neurotrophin signaling pathway;ko05162//Measles;ko04620//Toll-like receptor signaling pathway;ko05164//Influenza A;ko05140//Leishmaniasis;ko05152//Tuberculosis;ko04064//NF-kappa B signaling pathway;ko04210//Apoptosis	GO:0005886//plasma membrane;GO:0016021//integral component of membrane;GO:0016023//cytoplasmic, membrane-bounded vesicle	GO:0005524//ATP binding;GO:0004674//protein serine/threonine kinase activity	GO:0006468//protein phosphorylation	gi|38344329|emb|CAD41745.2|/0/OSJNBa0058K23.11 [Oryza sativa Japonica Group]
TCONS_00008924	up	2.83107	LOC_Os04g43440	up	1.59992	ko04626//Plant-pathogen interaction	-	GO:0043531//ADP binding;GO:0005524//ATP binding	-	gi|38344648|emb|CAE02341.2|;gi|218195212|gb|EEC77639.1|/1.82401e-34;0/OSJNBb0072M01.2 [Oryza sativa Japonica Group];hypothetical protein OsI_16631 [Oryza sativa Indica Group]
TCONS_00008924	up	2.83107	LOC_Os11g10770	up	1.50038	ko00230//Purine metabolism;ko04623//Cytosolic DNA-sensing pathway;ko04626//Plant-pathogen interaction;ko05016//Huntington's disease;ko05169//Epstein-Barr virus infection;ko00240//Pyrimidine metabolism;ko01100//Metabolic pathways;ko03020//RNA polymerase	GO:0016023//cytoplasmic, membrane-bounded vesicle	GO:0043531//ADP binding	-	gi|77549339|gb|ABA92136.1|/0/NB-ARC domain containing protein, expressed [Oryza sativa Japonica Group]
TCONS_00008924	up	2.83107	LOC_Os09g34160	up	2.78303	ko04626//Plant-pathogen interaction	-	-	-	gi|937934061|dbj|BAT08976.1|/0/Os09g0517200 [Oryza sativa Japonica Group]
TCONS_00008924	up	2.83107	LOC_Os08g27170	up	2.32357	ko04916//Melanogenesis;ko04020//Calcium signaling pathway;ko04270//Vascular smooth muscle contraction;ko05133//Pertussis;ko04744//Phototransduction;ko04626//Plant-pathogen interaction;ko04910//Insulin signaling pathway;ko04970//Salivary secretion;ko04912//GnRH signaling pathway;ko04722//Neurotrophin signaling pathway;ko05034//Alcoholism;ko05031//Amphetamine addiction;ko04745//Phototransduction - …	-	GO:0005516//calmodulin binding	GO:0006950//response to stress	gi|1002289249|ref|XP_015648922.1|/0/PREDICTED: protein SAR DEFICIENT 1-like [Oryza sativa Japonica Group]
TCONS_00008924	up	2.83107	LOC_Os07g07990	up	2.49311	ko04626//Plant-pathogen interaction	GO:0016023//cytoplasmic, membrane-bounded vesicle	GO:0016301//kinase activity	GO:0016310//phosphorylation	gi|1002284784|ref|XP_015646691.1|/0/PREDICTED: leucine-rich repeat extensin-like protein 6 [Oryza sativa Japonica Group]
TCONS_00008924	up	2.83107	LOC_Os10g25090	up	3.88245	ko04626//Plant-pathogen interaction	GO:0016021//integral component of membrane	GO:0004672//protein kinase activity;GO:0005524//ATP binding	GO:0006468//protein phosphorylation	gi|113639111|dbj|BAF26416.1|/0/Os10g0389800 [Oryza sativa Japonica Group]
TCONS_00091345	up	2.80973	LOC_Os04g43440	up	1.59992	ko04626//Plant-pathogen interaction	-	GO:0043531//ADP binding;GO:0005524//ATP binding	-	gi|38344648|emb|CAE02341.2|;gi|218195212|gb|EEC77639.1|/1.82401e-34;0/OSJNBb0072M01.2 [Oryza sativa Japonica Group];hypothetical protein OsI_16631 [Oryza sativa Indica Group]
TCONS_00091345	up	2.80973	LOC_Os01g04280	up	1.58244	ko04916//Melanogenesis;ko04020//Calcium signaling pathway;ko04270//Vascular smooth muscle contraction;ko05133//Pertussis;ko04744//Phototransduction;ko04626//Plant-pathogen interaction;ko04910//Insulin signaling pathway;ko04970//Salivary secretion;ko04912//GnRH signaling pathway;ko04722//Neurotrophin signaling pathway;ko05034//Alcoholism;ko05031//Amphetamine addiction;ko04745//Phototransduction - …	-	GO:0005516//calmodulin binding	GO:0006950//response to stress	gi|15528601|dbj|BAB64623.1|/0/calmodulin-binding protein -like [Oryza sativa Japonica Group]
TCONS_00091345	up	2.80973	LOC_Os11g10770	up	1.50038	ko00230//Purine metabolism;ko04623//Cytosolic DNA-sensing pathway;ko04626//Plant-pathogen interaction;ko05016//Huntington's disease;ko05169//Epstein-Barr virus infection;ko00240//Pyrimidine metabolism;ko01100//Metabolic pathways;ko03020//RNA polymerase	GO:0016023//cytoplasmic, membrane-bounded vesicle	GO:0043531//ADP binding	-	gi|77549339|gb|ABA92136.1|/0/NB-ARC domain containing protein, expressed [Oryza sativa Japonica Group]
TCONS_00091345	up	2.80973	LOC_Os06g14030	up	2.94829	ko04626//Plant-pathogen interaction	GO:0005887//integral component of plasma membrane	GO:0005249//voltage-gated potassium channel activity	GO:0034765//regulation of ion transmembrane transport;GO:0071805//potassium ion transmembrane transport;GO:0042391//regulation of membrane potential	gi|75114599|sp|Q653P0.1|KOR1_ORYSJ/0/RecName: Full=Potassium channel KOR1; AltName: Full=K(+) outward-rectifying channel 1
TCONS_00091345	up	2.80973	LOC_Os09g34160	up	2.78303	ko04626//Plant-pathogen interaction	-	-	-	gi|937934061|dbj|BAT08976.1|/0/Os09g0517200 [Oryza sativa Japonica Group]
TCONS_00091345	up	2.80973	LOC_Os08g27170	up	2.32357	ko04916//Melanogenesis;ko04020//Calcium signaling pathway;ko04270//Vascular smooth muscle contraction;ko05133//Pertussis;ko04744//Phototransduction;ko04626//Plant-pathogen interaction;ko04910//Insulin signaling pathway;ko04970//Salivary secretion;ko04912//GnRH signaling pathway;ko04722//Neurotrophin signaling pathway;ko05034//Alcoholism;ko05031//Amphetamine addiction;ko04745//Phototransduction - …	-	GO:0005516//calmodulin binding	GO:0006950//response to stress	gi|1002289249|ref|XP_015648922.1|/0/PREDICTED: protein SAR DEFICIENT 1-like [Oryza sativa Japonica Group]
TCONS_00091345	up	2.80973	LOC_Os07g07990	up	2.49311	ko04626//Plant-pathogen interaction	GO:0016023//cytoplasmic, membrane-bounded vesicle	GO:0016301//kinase activity	GO:0016310//phosphorylation	gi|1002284784|ref|XP_015646691.1|/0/PREDICTED: leucine-rich repeat extensin-like protein 6 [Oryza sativa Japonica Group]
TCONS_00091345	up	2.80973	LOC_Os10g25090	up	3.88245	ko04626//Plant-pathogen interaction	GO:0016021//integral component of membrane	GO:0004672//protein kinase activity;GO:0005524//ATP binding	GO:0006468//protein phosphorylation	gi|113639111|dbj|BAF26416.1|/0/Os10g0389800 [Oryza sativa Japonica Group]
TCONS_00065705	up	2.64989	LOC_Os01g12420	up	4.83141	ko05142//Chagas disease (American trypanosomiasis);ko05133//Pertussis;ko05145//Toxoplasmosis;ko04626//Plant-pathogen interaction;ko04075//Plant hormone signal transduction;ko04722//Neurotrophin signaling pathway;ko05162//Measles;ko04620//Toll-like receptor signaling pathway;ko05164//Influenza A;ko05140//Leishmaniasis;ko05152//Tuberculosis;ko04064//NF-kappa B signaling pathway;ko04210//Apoptosis	GO:0016021//integral component of membrane;GO:0016023//cytoplasmic, membrane-bounded vesicle;GO:0005886//plasma membrane	GO:0004674//protein serine/threonine kinase activity;GO:0005524//ATP binding	GO:0006468//protein phosphorylation;GO:0048544//recognition of pollen	gi|113531979|dbj|BAF04362.1|/0/Os01g0223900 [Oryza sativa Japonica Group]
TCONS_00065705	up	2.64989	LOC_Os03g08320	up	2.34133	ko04626//Plant-pathogen interaction;ko04075//Plant hormone signal transduction	GO:0005634//nucleus	GO:0003714//transcription corepressor activity	GO:1903507//negative regulation of nucleic acid-templated transcription;GO:2000022//regulation of jasmonic acid mediated signaling pathway;GO:0009611//response to wounding;GO:0031347//regulation of defense response;GO:0006351//transcription, DNA-templated	gi|75150198|sp|Q8GRS2.1|TI11C_ORYSJ/3.02982e-111/RecName: Full=Protein TIFY 11c; Short=OsTIFY11c; AltName: Full=Jasmonate ZIM domain-containing protein 11; Short=OsJAZ11; AltName: Full=OsJAZ2
TCONS_00065705	up	2.64989	LOC_Os05g39720	up	2.58547	ko04626//Plant-pathogen interaction	GO:0009536//plastid	-	-	gi|46394394|tpg|DAA05135.1|/0/TPA_inf: WRKY transcription factor 70 [Oryza sativa (indica cultivar-group)] [Oryza sativa Indica Group]
TCONS_00065705	up	2.64989	LOC_Os01g06730	up	3.23876	ko04626//Plant-pathogen interaction	GO:0016021//integral component of membrane;GO:0016023//cytoplasmic, membrane-bounded vesicle	-	-	gi|1002227256|ref|XP_015630998.1|/0/PREDICTED: receptor-like protein 12 [Oryza sativa Japonica Group]
TCONS_00065705	up	2.64989	LOC_Os01g28500	up	6.58452	ko04626//Plant-pathogen interaction;ko04075//Plant hormone signal transduction	GO:0005576//extracellular region;GO:0016023//cytoplasmic, membrane-bounded vesicle	-	GO:0006952//defense response;GO:0009607//response to biotic stimulus	gi|113532622|dbj|BAF05005.1|/2.75482e-123/Os01g0382400 [Oryza sativa Japonica Group]
TCONS_00065705	up	2.64989	LOC_Os09g26780	up	2.12255	ko04626//Plant-pathogen interaction;ko04075//Plant hormone signal transduction	GO:0005829//cytosol;GO:0005634//nucleus	GO:0003714//transcription corepressor activity	GO:1903507//negative regulation of nucleic acid-templated transcription;GO:2000022//regulation of jasmonic acid mediated signaling pathway;GO:0009611//response to wounding;GO:0006355//regulation of transcription, DNA-templated;GO:0031347//regulation of defense response	gi|75118454|sp|Q69P94.1|TI10C_ORYSJ/3.53152e-132/RecName: Full=Protein TIFY 10c; Short=OsTIFY10c; AltName: Full=Jasmonate ZIM domain-containing protein 8; Short=OsJAZ8; AltName: Full=OsJAZ7
TCONS_00065705	up	2.64989	LOC_Os04g41380	up	2.3587	ko00230//Purine metabolism;ko04623//Cytosolic DNA-sensing pathway;ko04626//Plant-pathogen interaction;ko05016//Huntington's disease;ko05169//Epstein-Barr virus infection;ko00240//Pyrimidine metabolism;ko01100//Metabolic pathways;ko03020//RNA polymerase	-	-	-	gi|32483317|emb|CAE02492.1|/0/OSJNBa0076N16.15 [Oryza sativa Japonica Group]
TCONS_00065705	up	2.64989	LOC_Os08g40270	up	3.48466	ko00903//Limonene and pinene degradation;ko05142//Chagas disease (American trypanosomiasis);ko05133//Pertussis;ko05145//Toxoplasmosis;ko04626//Plant-pathogen interaction;ko00642//Ethylbenzene degradation;ko00362//Benzoate degradation;ko04075//Plant hormone signal transduction;ko04722//Neurotrophin signaling pathway;ko05162//Measles;ko00240//Pyrimidine metabolism;ko00051//Fructose and mannose meta…	-	GO:0005488;GO:0016301//kinase activity	-	gi|1002290014|ref|XP_015649334.1|/0/PREDICTED: uncharacterized protein LOC4346025 [Oryza sativa Japonica Group]
TCONS_00065705	up	2.64989	LOC_Os08g10310	up	5.21338	ko05142//Chagas disease (American trypanosomiasis);ko05133//Pertussis;ko05145//Toxoplasmosis;ko04626//Plant-pathogen interaction;ko04075//Plant hormone signal transduction;ko04722//Neurotrophin signaling pathway;ko05162//Measles;ko04620//Toll-like receptor signaling pathway;ko05164//Influenza A;ko05140//Leishmaniasis;ko05152//Tuberculosis;ko04064//NF-kappa B signaling pathway;ko04210//Apoptosis	GO:0005886//plasma membrane;GO:0016021//integral component of membrane;GO:0016023//cytoplasmic, membrane-bounded vesicle;GO:0005739//mitochondrion	GO:0005524//ATP binding;GO:0004674//protein serine/threonine kinase activity	GO:0006468//protein phosphorylation	gi|1002291248|ref|XP_015649962.1|;gi|113623192|dbj|BAF23137.1|/0;0/PREDICTED: probable LRR receptor-like serine/threonine-protein kinase At1g56140 isoform X2 [Oryza sativa Japonica Group];Os08g0203400 [Oryza sativa Japonica Group]
TCONS_00065705	up	2.64989	LOC_Os07g03710	up	3.90007	ko04626//Plant-pathogen interaction;ko04075//Plant hormone signal transduction	GO:0005576//extracellular region;GO:0016023//cytoplasmic, membrane-bounded vesicle	-	-	gi|937924997|dbj|BAS99913.1|/1.00022e-91/Os07g0129200, partial [Oryza sativa Japonica Group]
TCONS_00065705	up	2.64989	LOC_Os10g20120	up	3.05748	ko05142//Chagas disease (American trypanosomiasis);ko05133//Pertussis;ko05145//Toxoplasmosis;ko04626//Plant-pathogen interaction;ko04075//Plant hormone signal transduction;ko04722//Neurotrophin signaling pathway;ko05162//Measles;ko04620//Toll-like receptor signaling pathway;ko05164//Influenza A;ko05140//Leishmaniasis;ko05152//Tuberculosis;ko04064//NF-kappa B signaling pathway;ko04210//Apoptosis	GO:0005886//plasma membrane;GO:0016021//integral component of membrane	GO:0030246//carbohydrate binding;GO:0005524//ATP binding;GO:0004674//protein serine/threonine kinase activity	GO:0048544//recognition of pollen;GO:0006468//protein phosphorylation	gi|31431340|gb|AAP53135.1|/0/D-mannose binding lectin family protein, expressed [Oryza sativa Japonica Group]
TCONS_00065705	up	2.64989	LOC_Os01g12430	up	1.95235	ko00903//Limonene and pinene degradation;ko05142//Chagas disease (American trypanosomiasis);ko05133//Pertussis;ko05145//Toxoplasmosis;ko04626//Plant-pathogen interaction;ko00642//Ethylbenzene degradation;ko00362//Benzoate degradation;ko04075//Plant hormone signal transduction;ko04722//Neurotrophin signaling pathway;ko05162//Measles;ko00240//Pyrimidine metabolism;ko00051//Fructose and mannose meta…	GO:0016021//integral component of membrane;GO:0016023//cytoplasmic, membrane-bounded vesicle;GO:0005886//plasma membrane	GO:0004674//protein serine/threonine kinase activity;GO:0005524//ATP binding	GO:0006468//protein phosphorylation;GO:0048544//recognition of pollen	gi|255673013|dbj|BAF04363.2|/0/Os01g0224000 [Oryza sativa Japonica Group]
TCONS_00065705	up	2.64989	LOC_Os01g04580	up	1.88469	ko05142//Chagas disease (American trypanosomiasis);ko05133//Pertussis;ko05145//Toxoplasmosis;ko04626//Plant-pathogen interaction;ko04075//Plant hormone signal transduction;ko04722//Neurotrophin signaling pathway;ko05162//Measles;ko04620//Toll-like receptor signaling pathway;ko05164//Influenza A;ko05140//Leishmaniasis;ko05152//Tuberculosis;ko04064//NF-kappa B signaling pathway;ko04210//Apoptosis	GO:0016021//integral component of membrane	GO:0030247//polysaccharide binding;GO:0005524//ATP binding;GO:0004674//protein serine/threonine kinase activity	GO:0006468//protein phosphorylation	gi|113531501|dbj|BAF03884.1|/0/Os01g0138400 [Oryza sativa Japonica Group]
TCONS_00065705	up	2.64989	LOC_Os06g38670	up	1.64682	ko04626//Plant-pathogen interaction	GO:0016021//integral component of membrane;GO:0016023//cytoplasmic, membrane-bounded vesicle	GO:0005524//ATP binding;GO:0004674//protein serine/threonine kinase activity	GO:0006468//protein phosphorylation	gi|255677180|dbj|BAH93601.1|/0/Os06g0586150 [Oryza sativa Japonica Group]
TCONS_00065705	up	2.64989	LOC_Os03g20840	up	1.62208	ko00230//Purine metabolism;ko04623//Cytosolic DNA-sensing pathway;ko04626//Plant-pathogen interaction;ko05016//Huntington's disease;ko05169//Epstein-Barr virus infection;ko00240//Pyrimidine metabolism;ko01100//Metabolic pathways;ko03020//RNA polymerase	-	GO:0043531//ADP binding	-	gi|108707907|gb|ABF95702.1|/0/NB-ARC domain containing protein, expressed [Oryza sativa Japonica Group]
TCONS_00065705	up	2.64989	LOC_Os06g44010	up	1.45223	ko04626//Plant-pathogen interaction	GO:0005634//nucleus	GO:0003700//transcription factor activity, sequence-specific DNA binding	GO:0006952//defense response;GO:0009685//gibberellin metabolic process	gi|1002274529|ref|XP_015641578.1|/0/PREDICTED: probable WRKY transcription factor 60 [Oryza sativa Japonica Group]
TCONS_00065705	up	2.64989	LOC_Os03g53020	up	1.10958	ko04626//Plant-pathogen interaction;ko04075//Plant hormone signal transduction	GO:0005634//nucleus	GO:0046983//protein dimerization activity	GO:0006351//transcription, DNA-templated	gi|75295028|sp|Q75KV9.1|BH148_ORYSJ/2.59534e-151/RecName: Full=Transcription factor BHLH148; AltName: Full=Basic helix-loop-helix protein 148; Short=OsbHLH148; AltName: Full=bHLH transcription factor bHLH148
TCONS_00065705	up	2.64989	LOC_Os04g52840	up	1.05873	ko05142//Chagas disease (American trypanosomiasis);ko05133//Pertussis;ko05145//Toxoplasmosis;ko04626//Plant-pathogen interaction;ko04722//Neurotrophin signaling pathway;ko05162//Measles;ko04620//Toll-like receptor signaling pathway;ko05164//Influenza A;ko05140//Leishmaniasis;ko05152//Tuberculosis;ko04064//NF-kappa B signaling pathway;ko04210//Apoptosis	GO:0005886//plasma membrane;GO:0016021//integral component of membrane;GO:0016023//cytoplasmic, membrane-bounded vesicle	GO:0005524//ATP binding;GO:0004674//protein serine/threonine kinase activity	GO:0006468//protein phosphorylation	gi|38344329|emb|CAD41745.2|/0/OSJNBa0058K23.11 [Oryza sativa Japonica Group]
TCONS_00065705	up	2.64989	LOC_Os12g36110	up	1.79675	ko04916//Melanogenesis;ko04020//Calcium signaling pathway;ko04270//Vascular smooth muscle contraction;ko05133//Pertussis;ko04744//Phototransduction;ko04626//Plant-pathogen interaction;ko04910//Insulin signaling pathway;ko04970//Salivary secretion;ko04912//GnRH signaling pathway;ko04722//Neurotrophin signaling pathway;ko05034//Alcoholism;ko05031//Amphetamine addiction;ko04745//Phototransduction - …	-	GO:0005516//calmodulin binding	GO:0006950//response to stress	gi|1002314498|ref|XP_015620621.1|/0/PREDICTED: calmodulin-binding protein 60 D isoform X2 [Oryza sativa Japonica Group]
TCONS_00005792	up	2.63888	LOC_Os11g10770	up	1.50038	ko00230//Purine metabolism;ko04623//Cytosolic DNA-sensing pathway;ko04626//Plant-pathogen interaction;ko05016//Huntington's disease;ko05169//Epstein-Barr virus infection;ko00240//Pyrimidine metabolism;ko01100//Metabolic pathways;ko03020//RNA polymerase	GO:0016023//cytoplasmic, membrane-bounded vesicle	GO:0043531//ADP binding	-	gi|77549339|gb|ABA92136.1|/0/NB-ARC domain containing protein, expressed [Oryza sativa Japonica Group]
TCONS_00005792	up	2.63888	LOC_Os04g43440	up	1.59992	ko04626//Plant-pathogen interaction	-	GO:0043531//ADP binding;GO:0005524//ATP binding	-	gi|38344648|emb|CAE02341.2|;gi|218195212|gb|EEC77639.1|/1.82401e-34;0/OSJNBb0072M01.2 [Oryza sativa Japonica Group];hypothetical protein OsI_16631 [Oryza sativa Indica Group]
TCONS_00005792	up	2.63888	LOC_Os07g07990	up	2.49311	ko04626//Plant-pathogen interaction	GO:0016023//cytoplasmic, membrane-bounded vesicle	GO:0016301//kinase activity	GO:0016310//phosphorylation	gi|1002284784|ref|XP_015646691.1|/0/PREDICTED: leucine-rich repeat extensin-like protein 6 [Oryza sativa Japonica Group]
TCONS_00005792	up	2.63888	LOC_Os10g25090	up	3.88245	ko04626//Plant-pathogen interaction	GO:0016021//integral component of membrane	GO:0004672//protein kinase activity;GO:0005524//ATP binding	GO:0006468//protein phosphorylation	gi|113639111|dbj|BAF26416.1|/0/Os10g0389800 [Oryza sativa Japonica Group]
TCONS_00010868	up	2.63376	LOC_Os01g04330	up	1.8957	ko04626//Plant-pathogen interaction	-	GO:0005509//calcium ion binding	-	gi|75322067|sp|Q5ZCK5.1|CML16_ORYSJ/6.24251e-118/RecName: Full=Probable calcium-binding protein CML16; AltName: Full=Calmodulin-like protein 16
TCONS_00010868	up	2.63376	LOC_Os01g04280	up	1.58244	ko04916//Melanogenesis;ko04020//Calcium signaling pathway;ko04270//Vascular smooth muscle contraction;ko05133//Pertussis;ko04744//Phototransduction;ko04626//Plant-pathogen interaction;ko04910//Insulin signaling pathway;ko04970//Salivary secretion;ko04912//GnRH signaling pathway;ko04722//Neurotrophin signaling pathway;ko05034//Alcoholism;ko05031//Amphetamine addiction;ko04745//Phototransduction - …	-	GO:0005516//calmodulin binding	GO:0006950//response to stress	gi|15528601|dbj|BAB64623.1|/0/calmodulin-binding protein -like [Oryza sativa Japonica Group]
TCONS_00010868	up	2.63376	LOC_Os04g43440	up	1.59992	ko04626//Plant-pathogen interaction	-	GO:0043531//ADP binding;GO:0005524//ATP binding	-	gi|38344648|emb|CAE02341.2|;gi|218195212|gb|EEC77639.1|/1.82401e-34;0/OSJNBb0072M01.2 [Oryza sativa Japonica Group];hypothetical protein OsI_16631 [Oryza sativa Indica Group]
TCONS_00010868	up	2.63376	LOC_Os11g10770	up	1.50038	ko00230//Purine metabolism;ko04623//Cytosolic DNA-sensing pathway;ko04626//Plant-pathogen interaction;ko05016//Huntington's disease;ko05169//Epstein-Barr virus infection;ko00240//Pyrimidine metabolism;ko01100//Metabolic pathways;ko03020//RNA polymerase	GO:0016023//cytoplasmic, membrane-bounded vesicle	GO:0043531//ADP binding	-	gi|77549339|gb|ABA92136.1|/0/NB-ARC domain containing protein, expressed [Oryza sativa Japonica Group]
TCONS_00010868	up	2.63376	LOC_Os07g07990	up	2.49311	ko04626//Plant-pathogen interaction	GO:0016023//cytoplasmic, membrane-bounded vesicle	GO:0016301//kinase activity	GO:0016310//phosphorylation	gi|1002284784|ref|XP_015646691.1|/0/PREDICTED: leucine-rich repeat extensin-like protein 6 [Oryza sativa Japonica Group]
TCONS_00010868	up	2.63376	LOC_Os10g25090	up	3.88245	ko04626//Plant-pathogen interaction	GO:0016021//integral component of membrane	GO:0004672//protein kinase activity;GO:0005524//ATP binding	GO:0006468//protein phosphorylation	gi|113639111|dbj|BAF26416.1|/0/Os10g0389800 [Oryza sativa Japonica Group]
TCONS_00056787	up	2.47695	LOC_Os06g14030	up	2.94829	ko04626//Plant-pathogen interaction	GO:0005887//integral component of plasma membrane	GO:0005249//voltage-gated potassium channel activity	GO:0034765//regulation of ion transmembrane transport;GO:0071805//potassium ion transmembrane transport;GO:0042391//regulation of membrane potential	gi|75114599|sp|Q653P0.1|KOR1_ORYSJ/0/RecName: Full=Potassium channel KOR1; AltName: Full=K(+) outward-rectifying channel 1
TCONS_00056787	up	2.47695	LOC_Os09g26660	up	1.901	ko04626//Plant-pathogen interaction	GO:0016021//integral component of membrane	GO:0050664//oxidoreductase activity, acting on NAD(P)H, oxygen as acceptor;GO:0004601//peroxidase activity;GO:0005509//calcium ion binding	GO:0098869//cellular oxidant detoxification;GO:0055114//oxidation-reduction process	gi|113631500|dbj|BAF25181.1|/0/Os09g0438000 [Oryza sativa Japonica Group]
TCONS_00056787	up	2.47695	LOC_Os11g10770	up	1.50038	ko00230//Purine metabolism;ko04623//Cytosolic DNA-sensing pathway;ko04626//Plant-pathogen interaction;ko05016//Huntington's disease;ko05169//Epstein-Barr virus infection;ko00240//Pyrimidine metabolism;ko01100//Metabolic pathways;ko03020//RNA polymerase	GO:0016023//cytoplasmic, membrane-bounded vesicle	GO:0043531//ADP binding	-	gi|77549339|gb|ABA92136.1|/0/NB-ARC domain containing protein, expressed [Oryza sativa Japonica Group]
TCONS_00056787	up	2.47695	LOC_Os11g30210	up	1.32295	ko00230//Purine metabolism;ko04623//Cytosolic DNA-sensing pathway;ko04626//Plant-pathogen interaction;ko05016//Huntington's disease;ko05169//Epstein-Barr virus infection;ko00240//Pyrimidine metabolism;ko01100//Metabolic pathways;ko03020//RNA polymerase	-	GO:0043531//ADP binding	-	gi|77550959|gb|ABA93756.1|/0/NB-ARC domain containing protein [Oryza sativa Japonica Group]
TCONS_00056787	up	2.47695	LOC_Os04g43440	up	1.59992	ko04626//Plant-pathogen interaction	-	GO:0043531//ADP binding;GO:0005524//ATP binding	-	gi|38344648|emb|CAE02341.2|;gi|218195212|gb|EEC77639.1|/1.82401e-34;0/OSJNBb0072M01.2 [Oryza sativa Japonica Group];hypothetical protein OsI_16631 [Oryza sativa Indica Group]
TCONS_00056787	up	2.47695	LOC_Os09g34160	up	2.78303	ko04626//Plant-pathogen interaction	-	-	-	gi|937934061|dbj|BAT08976.1|/0/Os09g0517200 [Oryza sativa Japonica Group]
TCONS_00056787	up	2.47695	LOC_Os01g56330	up	2.70029	ko00903//Limonene and pinene degradation;ko05142//Chagas disease (American trypanosomiasis);ko05133//Pertussis;ko05145//Toxoplasmosis;ko04626//Plant-pathogen interaction;ko00642//Ethylbenzene degradation;ko00362//Benzoate degradation;ko04722//Neurotrophin signaling pathway;ko05162//Measles;ko00240//Pyrimidine metabolism;ko00051//Fructose and mannose metabolism;ko04620//Toll-like receptor signalin…	GO:0016021//integral component of membrane;GO:0016023//cytoplasmic, membrane-bounded vesicle	GO:0005524//ATP binding;GO:0004674//protein serine/threonine kinase activity	GO:0006468//protein phosphorylation	gi|113533903|dbj|BAF06286.1|/0/Os01g0769700 [Oryza sativa Japonica Group]
TCONS_00056787	up	2.47695	LOC_Os03g08550	up	3.10456	ko04626//Plant-pathogen interaction	GO:0016021//integral component of membrane;GO:0016023//cytoplasmic, membrane-bounded vesicle	GO:0004672//protein kinase activity;GO:0005524//ATP binding	GO:0006468//protein phosphorylation	gi|1002848586|ref|XP_006649512.2|/0/PREDICTED: protein STRUBBELIG-RECEPTOR FAMILY 7-like [Oryza brachyantha]
TCONS_00056787	up	2.47695	LOC_Os08g27170	up	2.32357	ko04916//Melanogenesis;ko04020//Calcium signaling pathway;ko04270//Vascular smooth muscle contraction;ko05133//Pertussis;ko04744//Phototransduction;ko04626//Plant-pathogen interaction;ko04910//Insulin signaling pathway;ko04970//Salivary secretion;ko04912//GnRH signaling pathway;ko04722//Neurotrophin signaling pathway;ko05034//Alcoholism;ko05031//Amphetamine addiction;ko04745//Phototransduction - …	-	GO:0005516//calmodulin binding	GO:0006950//response to stress	gi|1002289249|ref|XP_015648922.1|/0/PREDICTED: protein SAR DEFICIENT 1-like [Oryza sativa Japonica Group]
TCONS_00056787	up	2.47695	LOC_Os07g07990	up	2.49311	ko04626//Plant-pathogen interaction	GO:0016023//cytoplasmic, membrane-bounded vesicle	GO:0016301//kinase activity	GO:0016310//phosphorylation	gi|1002284784|ref|XP_015646691.1|/0/PREDICTED: leucine-rich repeat extensin-like protein 6 [Oryza sativa Japonica Group]
TCONS_00056787	up	2.47695	LOC_Os10g25090	up	3.88245	ko04626//Plant-pathogen interaction	GO:0016021//integral component of membrane	GO:0004672//protein kinase activity;GO:0005524//ATP binding	GO:0006468//protein phosphorylation	gi|113639111|dbj|BAF26416.1|/0/Os10g0389800 [Oryza sativa Japonica Group]
TCONS_00056787	up	2.47695	LOC_Os05g24780	up	3.44751	ko04626//Plant-pathogen interaction	GO:0009536//plastid	GO:0005509//calcium ion binding	-	gi|125551781|gb|EAY97490.1|/2.41556e-50/hypothetical protein OsI_19419 [Oryza sativa Indica Group]
TCONS_00059316	up	2.2842	LOC_Os11g44430	up	1.96939	ko05142//Chagas disease (American trypanosomiasis);ko05133//Pertussis;ko05145//Toxoplasmosis;ko04626//Plant-pathogen interaction;ko04722//Neurotrophin signaling pathway;ko05162//Measles;ko04620//Toll-like receptor signaling pathway;ko05164//Influenza A;ko05140//Leishmaniasis;ko05152//Tuberculosis;ko04064//NF-kappa B signaling pathway;ko04210//Apoptosis	-	GO:0005524//ATP binding;GO:0004674//protein serine/threonine kinase activity	GO:0006468//protein phosphorylation	gi|77552359|gb|ABA95156.1|/0/Protein kinase domain containing protein, expressed [Oryza sativa Japonica Group]
TCONS_00059316	up	2.2842	LOC_Os01g04330	up	1.8957	ko04626//Plant-pathogen interaction	-	GO:0005509//calcium ion binding	-	gi|75322067|sp|Q5ZCK5.1|CML16_ORYSJ/6.24251e-118/RecName: Full=Probable calcium-binding protein CML16; AltName: Full=Calmodulin-like protein 16
TCONS_00059316	up	2.2842	LOC_Os08g44390	up	1.78933	ko04626//Plant-pathogen interaction	GO:0005737//cytoplasm	GO:0004198//calcium-dependent cysteine-type endopeptidase activity;GO:0005509//calcium ion binding	GO:0006508//proteolysis	gi|113624460|dbj|BAF24405.1|/3.04726e-115/Os08g0558100 [Oryza sativa Japonica Group]
TCONS_00059316	up	2.2842	LOC_Os07g07990	up	2.49311	ko04626//Plant-pathogen interaction	GO:0016023//cytoplasmic, membrane-bounded vesicle	GO:0016301//kinase activity	GO:0016310//phosphorylation	gi|1002284784|ref|XP_015646691.1|/0/PREDICTED: leucine-rich repeat extensin-like protein 6 [Oryza sativa Japonica Group]
TCONS_00059822	up	2.24492	LOC_Os04g48930	up	5.48432	ko04626//Plant-pathogen interaction	GO:0016020//membrane	-	-	gi|116309691|emb|CAH66739.1|;gi|937915711|dbj|BAS90630.1|/0;0/H0404F02.15 [Oryza sativa Indica Group];Os04g0578600, partial [Oryza sativa Japonica Group]
TCONS_00059822	up	2.24492	LOC_Os10g25090	up	3.88245	ko04626//Plant-pathogen interaction	GO:0016021//integral component of membrane	GO:0004672//protein kinase activity;GO:0005524//ATP binding	GO:0006468//protein phosphorylation	gi|113639111|dbj|BAF26416.1|/0/Os10g0389800 [Oryza sativa Japonica Group]
TCONS_00059822	up	2.24492	LOC_Os05g24780	up	3.44751	ko04626//Plant-pathogen interaction	GO:0009536//plastid	GO:0005509//calcium ion binding	-	gi|125551781|gb|EAY97490.1|/2.41556e-50/hypothetical protein OsI_19419 [Oryza sativa Indica Group]
TCONS_00059822	up	2.24492	LOC_Os07g07990	up	2.49311	ko04626//Plant-pathogen interaction	GO:0016023//cytoplasmic, membrane-bounded vesicle	GO:0016301//kinase activity	GO:0016310//phosphorylation	gi|1002284784|ref|XP_015646691.1|/0/PREDICTED: leucine-rich repeat extensin-like protein 6 [Oryza sativa Japonica Group]
TCONS_00059822	up	2.24492	LOC_Os06g14030	up	2.94829	ko04626//Plant-pathogen interaction	GO:0005887//integral component of plasma membrane	GO:0005249//voltage-gated potassium channel activity	GO:0034765//regulation of ion transmembrane transport;GO:0071805//potassium ion transmembrane transport;GO:0042391//regulation of membrane potential	gi|75114599|sp|Q653P0.1|KOR1_ORYSJ/0/RecName: Full=Potassium channel KOR1; AltName: Full=K(+) outward-rectifying channel 1
TCONS_00059822	up	2.24492	LOC_Os04g43440	up	1.59992	ko04626//Plant-pathogen interaction	-	GO:0043531//ADP binding;GO:0005524//ATP binding	-	gi|38344648|emb|CAE02341.2|;gi|218195212|gb|EEC77639.1|/1.82401e-34;0/OSJNBb0072M01.2 [Oryza sativa Japonica Group];hypothetical protein OsI_16631 [Oryza sativa Indica Group]
TCONS_00059822	up	2.24492	LOC_Os01g04280	up	1.58244	ko04916//Melanogenesis;ko04020//Calcium signaling pathway;ko04270//Vascular smooth muscle contraction;ko05133//Pertussis;ko04744//Phototransduction;ko04626//Plant-pathogen interaction;ko04910//Insulin signaling pathway;ko04970//Salivary secretion;ko04912//GnRH signaling pathway;ko04722//Neurotrophin signaling pathway;ko05034//Alcoholism;ko05031//Amphetamine addiction;ko04745//Phototransduction - …	-	GO:0005516//calmodulin binding	GO:0006950//response to stress	gi|15528601|dbj|BAB64623.1|/0/calmodulin-binding protein -like [Oryza sativa Japonica Group]
TCONS_00059822	up	2.24492	LOC_Os11g10770	up	1.50038	ko00230//Purine metabolism;ko04623//Cytosolic DNA-sensing pathway;ko04626//Plant-pathogen interaction;ko05016//Huntington's disease;ko05169//Epstein-Barr virus infection;ko00240//Pyrimidine metabolism;ko01100//Metabolic pathways;ko03020//RNA polymerase	GO:0016023//cytoplasmic, membrane-bounded vesicle	GO:0043531//ADP binding	-	gi|77549339|gb|ABA92136.1|/0/NB-ARC domain containing protein, expressed [Oryza sativa Japonica Group]
TCONS_00059822	up	2.24492	LOC_Os09g34160	up	2.78303	ko04626//Plant-pathogen interaction	-	-	-	gi|937934061|dbj|BAT08976.1|/0/Os09g0517200 [Oryza sativa Japonica Group]
TCONS_00059822	up	2.24492	LOC_Os03g08550	up	3.10456	ko04626//Plant-pathogen interaction	GO:0016021//integral component of membrane;GO:0016023//cytoplasmic, membrane-bounded vesicle	GO:0004672//protein kinase activity;GO:0005524//ATP binding	GO:0006468//protein phosphorylation	gi|1002848586|ref|XP_006649512.2|/0/PREDICTED: protein STRUBBELIG-RECEPTOR FAMILY 7-like [Oryza brachyantha]
TCONS_00059822	up	2.24492	LOC_Os08g27170	up	2.32357	ko04916//Melanogenesis;ko04020//Calcium signaling pathway;ko04270//Vascular smooth muscle contraction;ko05133//Pertussis;ko04744//Phototransduction;ko04626//Plant-pathogen interaction;ko04910//Insulin signaling pathway;ko04970//Salivary secretion;ko04912//GnRH signaling pathway;ko04722//Neurotrophin signaling pathway;ko05034//Alcoholism;ko05031//Amphetamine addiction;ko04745//Phototransduction - …	-	GO:0005516//calmodulin binding	GO:0006950//response to stress	gi|1002289249|ref|XP_015648922.1|/0/PREDICTED: protein SAR DEFICIENT 1-like [Oryza sativa Japonica Group]
TCONS_00059318	up	1.9494	LOC_Os08g44390	up	1.78933	ko04626//Plant-pathogen interaction	GO:0005737//cytoplasm	GO:0004198//calcium-dependent cysteine-type endopeptidase activity;GO:0005509//calcium ion binding	GO:0006508//proteolysis	gi|113624460|dbj|BAF24405.1|/3.04726e-115/Os08g0558100 [Oryza sativa Japonica Group]
TCONS_00059318	up	1.9494	LOC_Os07g07990	up	2.49311	ko04626//Plant-pathogen interaction	GO:0016023//cytoplasmic, membrane-bounded vesicle	GO:0016301//kinase activity	GO:0016310//phosphorylation	gi|1002284784|ref|XP_015646691.1|/0/PREDICTED: leucine-rich repeat extensin-like protein 6 [Oryza sativa Japonica Group]
TCONS_00009978	up	1.89024	LOC_Os07g03820	up	1.56255	ko00903//Limonene and pinene degradation;ko05142//Chagas disease (American trypanosomiasis);ko05133//Pertussis;ko05145//Toxoplasmosis;ko04626//Plant-pathogen interaction;ko00642//Ethylbenzene degradation;ko00362//Benzoate degradation;ko04722//Neurotrophin signaling pathway;ko05162//Measles;ko00240//Pyrimidine metabolism;ko00051//Fructose and mannose metabolism;ko04620//Toll-like receptor signalin…	GO:0016021//integral component of membrane;GO:0016023//cytoplasmic, membrane-bounded vesicle	GO:0030246//carbohydrate binding;GO:0005524//ATP binding;GO:0004674//protein serine/threonine kinase activity	GO:0006468//protein phosphorylation	gi|28564579|dbj|BAC57688.1|/0/putative receptor-like protein kinase [Oryza sativa Japonica Group]
TCONS_00009978	up	1.89024	LOC_Os06g44010	up	1.45223	ko04626//Plant-pathogen interaction	GO:0005634//nucleus	GO:0003700//transcription factor activity, sequence-specific DNA binding	GO:0006952//defense response;GO:0009685//gibberellin metabolic process	gi|1002274529|ref|XP_015641578.1|/0/PREDICTED: probable WRKY transcription factor 60 [Oryza sativa Japonica Group]
TCONS_00011723	up	1.58332	LOC_Os07g35290	up	1.47007	ko05142//Chagas disease (American trypanosomiasis);ko05133//Pertussis;ko05145//Toxoplasmosis;ko04626//Plant-pathogen interaction;ko04722//Neurotrophin signaling pathway;ko05162//Measles;ko04620//Toll-like receptor signaling pathway;ko05164//Influenza A;ko05140//Leishmaniasis;ko05152//Tuberculosis;ko04064//NF-kappa B signaling pathway;ko04210//Apoptosis	GO:0009506//plasmodesma;GO:0005886//plasma membrane;GO:0016021//integral component of membrane	GO:0005524//ATP binding;GO:0004674//protein serine/threonine kinase activity	GO:0006952//defense response;GO:0006468//protein phosphorylation	gi|1002285061|ref|XP_015646829.1|/0/PREDICTED: putative receptor-like protein kinase At4g00960 [Oryza sativa Japonica Group]
TCONS_00011723	up	1.58332	LOC_Os06g49380	up	1.19566	ko00230//Purine metabolism;ko04623//Cytosolic DNA-sensing pathway;ko04626//Plant-pathogen interaction;ko05016//Huntington's disease;ko05169//Epstein-Barr virus infection;ko00240//Pyrimidine metabolism;ko01100//Metabolic pathways;ko03020//RNA polymerase	-	GO:0043531//ADP binding	-	gi|1002279662|ref|XP_015644152.1|/0/PREDICTED: putative disease resistance protein RGA1 [Oryza sativa Japonica Group]
TCONS_00011723	up	1.58332	LOC_Os01g42330	up	1.04192	ko00230//Purine metabolism;ko04623//Cytosolic DNA-sensing pathway;ko04626//Plant-pathogen interaction;ko05016//Huntington's disease;ko05169//Epstein-Barr virus infection;ko00240//Pyrimidine metabolism;ko01100//Metabolic pathways;ko03020//RNA polymerase	-	-	-	gi|1002225948|ref|XP_015624498.1|/0/PREDICTED: disease resistance protein RGA2-like isoform X1 [Oryza sativa Japonica Group]
TCONS_00024711	down	-1.70926	LOC_Os01g25720	down	-1.24119	ko00230//Purine metabolism;ko04623//Cytosolic DNA-sensing pathway;ko04626//Plant-pathogen interaction;ko05016//Huntington's disease;ko05169//Epstein-Barr virus infection;ko00240//Pyrimidine metabolism;ko01100//Metabolic pathways;ko03020//RNA polymerase	-	GO:0043531//ADP binding	-	gi|53791625|dbj|BAD52972.1|/0/powdery mildew resistance protein PM3b-like protein [Oryza sativa Japonica Group]
TCONS_00024711	down	-1.70926	LOC_Os12g02450	down	-1.2597	ko04626//Plant-pathogen interaction	-	GO:0043565//sequence-specific DNA binding;GO:0003700//transcription factor activity, sequence-specific DNA binding	GO:0006355//regulation of transcription, DNA-templated	gi|77552845|gb|ABA95641.1|/0/WRKY DNA binding domain containing protein [Oryza sativa Japonica Group]
TCONS_00030021	down	-5.76237	LOC_Os06g15750	down	-1.31903	ko00230//Purine metabolism;ko04623//Cytosolic DNA-sensing pathway;ko04626//Plant-pathogen interaction;ko05016//Huntington's disease;ko05169//Epstein-Barr virus infection;ko00240//Pyrimidine metabolism;ko01100//Metabolic pathways;ko03020//RNA polymerase	-	-	-	gi|937922250|dbj|BAS97167.1|/0/Os06g0268500 [Oryza sativa Japonica Group]
TCONS_00030021	down	-5.76237	LOC_Os01g25720	down	-1.24119	ko00230//Purine metabolism;ko04623//Cytosolic DNA-sensing pathway;ko04626//Plant-pathogen interaction;ko05016//Huntington's disease;ko05169//Epstein-Barr virus infection;ko00240//Pyrimidine metabolism;ko01100//Metabolic pathways;ko03020//RNA polymerase	-	GO:0043531//ADP binding	-	gi|53791625|dbj|BAD52972.1|/0/powdery mildew resistance protein PM3b-like protein [Oryza sativa Japonica Group]
TCONS_00030021	down	-5.76237	LOC_Os11g11770	down	-1.2229	ko04626//Plant-pathogen interaction	-	GO:0043531//ADP binding	-	gi|77549407|gb|ABA92204.1|/0/NB-ARC domain containing protein, expressed [Oryza sativa Japonica Group]
TCONS_00030021	down	-5.76237	LOC_Os11g45750	down	-1.18473	ko04626//Plant-pathogen interaction	-	GO:0043531//ADP binding	-	gi|77552503|gb|ABA95300.1|/0/NB-ARC domain containing protein, expressed [Oryza sativa Japonica Group]
TCONS_00030021	down	-5.76237	LOC_Os05g41290	down	-1.18328	ko00230//Purine metabolism;ko04623//Cytosolic DNA-sensing pathway;ko04626//Plant-pathogen interaction;ko05016//Huntington's disease;ko05169//Epstein-Barr virus infection;ko00240//Pyrimidine metabolism;ko01100//Metabolic pathways;ko03020//RNA polymerase	-	GO:0043531//ADP binding	-	gi|937919753|dbj|BAS94671.1|/0/Os05g0492200 [Oryza sativa Japonica Group]
TCONS_00030021	down	-5.76237	LOC_Os01g02550	down	-1.58793	ko05142//Chagas disease (American trypanosomiasis);ko05133//Pertussis;ko05145//Toxoplasmosis;ko04626//Plant-pathogen interaction;ko04722//Neurotrophin signaling pathway;ko05162//Measles;ko04620//Toll-like receptor signaling pathway;ko05164//Influenza A;ko05140//Leishmaniasis;ko05152//Tuberculosis;ko04064//NF-kappa B signaling pathway;ko04210//Apoptosis	-	GO:0004672//protein kinase activity;GO:0000166//nucleotide binding	GO:0016310//phosphorylation	gi|573911913|ref|XP_006643674.1|/0/PREDICTED: glycerophosphodiester phosphodiesterase protein kinase domain-containing GDPDL2-like [Oryza brachyantha]
TCONS_00049628	down	-7.1162	LOC_Os11g07230	down	-1.07021	ko04626//Plant-pathogen interaction	GO:0016021//integral component of membrane;GO:0016023//cytoplasmic, membrane-bounded vesicle	GO:0005524//ATP binding;GO:0004674//protein serine/threonine kinase activity	GO:0006468//protein phosphorylation	gi|222615599|gb|EEE51731.1|/0/hypothetical protein OsJ_33139 [Oryza sativa Japonica Group]
TCONS_00049628	down	-7.1162	LOC_Os02g03960	down	-2.08275	ko05218//Melanoma;ko05160//Hepatitis C;ko05211//Renal cell carcinoma;ko04540//Gap junction;ko04725//Cholinergic synapse;ko04360//Axon guidance;ko04916//Melanogenesis;ko05142//Chagas disease (American trypanosomiasis);ko04270//Vascular smooth muscle contraction;ko05133//Pertussis;ko04062//Chemokine signaling pathway;ko05145//Toxoplasmosis;ko05221//Acute myeloid leukemia;ko04320//Dorso-ventral axis…	GO:0009536//plastid	GO:0043565//sequence-specific DNA binding;GO:0003700//transcription factor activity, sequence-specific DNA binding	GO:0006355//regulation of transcription, DNA-templated	gi|113535329|dbj|BAF07712.1|/4.03262e-62/Os02g0132500 [Oryza sativa Japonica Group]
TCONS_00040997	down	-8.28427	LOC_Os11g29520	down	-1.17466	ko00230//Purine metabolism;ko04623//Cytosolic DNA-sensing pathway;ko04626//Plant-pathogen interaction;ko05016//Huntington's disease;ko05169//Epstein-Barr virus infection;ko00240//Pyrimidine metabolism;ko01100//Metabolic pathways;ko03020//RNA polymerase	-	-	-	gi|77550984|gb|ABA93781.1|/0/NB-ARC domain containing protein, expressed [Oryza sativa Japonica Group]
